# Supplementary material for: First metagenomic analysis of the Andean condor (Vultur gryphus) gut microbiome reveals microbial diversity and wide resistome
Source: PeerJ. 2023 Jul 7;11:e15235. doi: 10.7717/peerj.15235 (PMC10332357; doi:10.7717/peerj.15235)
Supplement: Supplemental Information 1 [file peerj-11-15235-s001.xlsx]

## Sheet: ReAbu_GenusLevel
Phylum	Family	Genus	Relative Abundance
Proteobacteria	Rhodobacteraceae	Paracoccus	0.00369
Proteobacteria	Alcaligenaceae	Pusillimonas	0.08356
Proteobacteria	Campylobacteraceae	Campylobacter	0.06733
Proteobacteria	Alteromonadaceae	Marinobacter	0.05443
Proteobacteria	Enterobacteriaceae	Citrobacter	0.01171
Proteobacteria	Enterobacteriaceae	Escherichia	4.5212
Proteobacteria	Enterobacteriaceae	Plesiomonas	21.0397
Proteobacteria	Moraxellaceae	Psychrobacter	0.46235
Proteobacteria	Pseudomonadaceae	Pseudomonas	1.88338
Proteobacteria	Xanthomonadaceae	Stenotrophomonas	0.07972
Fusobacteria	Fusobacteriaceae	Cetobacterium	2.09374
Firmicutes	Bacillaceae	Bacillus	0.05905
Firmicutes	Bacillales_noname	Bhargavaea	0.02915
Firmicutes	Planococcaceae	Solibacillus	0.00574
Firmicutes	Staphylococcaceae	Macrococcus	0.0426
Firmicutes	Staphylococcaceae	Staphylococcus	0.51918
Firmicutes	Carnobacteriaceae	Carnobacterium	1.22176
Firmicutes	Enterococcaceae	Enterococcus	0.30558
Firmicutes	Lactobacillaceae	Lactobacillus	0.4903
Firmicutes	Streptococcaceae	Streptococcus	1.4068
Firmicutes	Clostridiaceae	Clostridium	34.905
Firmicutes	Peptostreptococcaceae	Peptostreptococcaceae_noname	28.273
Firmicutes	Erysipelotrichaceae	Turicibacter	0.08793
Bacteroidetes	Sphingobacteriaceae	Sphingobacterium	0.01132
Actinobacteria	Brevibacteriaceae	Brevibacterium	0.2209
Actinobacteria	Corynebacteriaceae	Corynebacterium	0.18506
Actinobacteria	Dermabacteraceae	Brachybacterium	0.35836
Actinobacteria	Dermabacteraceae	Dermabacteraceae_unclassified	0.35113
Actinobacteria	Dermatophilaceae	Dermatophilaceae_unclassified	0.11572
Actinobacteria	Dietziaceae	Dietzia	0.28709
Actinobacteria	Geodermatophilaceae	Geodermatophilaceae_unclassified	0.05863
Actinobacteria	Intrasporangiaceae	Serinicoccus	0.02545
Actinobacteria	Microbacteriaceae	Agromyces	0.0049
Actinobacteria	Microbacteriaceae	Leifsonia	0.03164
Actinobacteria	Microbacteriaceae	Leucobacter	0.05719
Actinobacteria	Micrococcaceae	Arthrobacter	0.15791
Actinobacteria	Micrococcaceae	Kocuria	0.38209
Actinobacteria	Nocardioidaceae	Nocardioides	0.01499

## Sheet: ReAbu_SpecieLevel
Genus	Specie	Relative Abundance
Agromyces	Agromyces unclassified	0.0049
Arthrobacter	Arthrobacter gangotriensis	0.15791
Bacillus	Bacillus isronensis	0.02128
Bacillus	Bacillus licheniformis	0.03777
Bhargavaea	Bhargavaea cecembensis	0.02915
Brachybacterium	Brachybacterium faecium	0.00157
Brachybacterium	Brachybacterium unclassified	0.35679
Brevibacterium	Brevibacterium linens	0.02675
Brevibacterium	Brevibacterium unclassified	0.19415
Campylobacter	Campylobacter jejuni	0.06733
Carnobacterium	Carnobacterium maltaromaticum	1.22176
Cetobacterium	Cetobacterium somerae	2.09374
Citrobacter	Citrobacter freundii	0.0008
Citrobacter	Citrobacter unclassified	0.01091
Clostridium	Clostridium bifermentans	0.01682
Clostridium	Clostridium celatum	0.06886
Clostridium	Clostridium glycolicum	0.43086
Clostridium	Clostridium novyi	0.01521
Clostridium	Clostridium perfringens	34.8209
Clostridium	Clostridium sordellii	1.31342
Corynebacterium	Corynebacterium efficiens	0.08921
Corynebacterium	Corynebacterium halotolerans	0.0485
Corynebacterium	Corynebacterium maris	0.04735
Dietzia	Dietzia alimentaria	0.2386
Dietzia	Dietzia unclassified	0.04849
Enterococcus	Enterococcus cecorum	0.07483
Enterococcus	Enterococcus faecalis	0.20282
Enterococcus	Enterococcus faecium	0.02793
Escherichia	Escherichia coli	4.2335
Escherichia	Escherichia unclassified	0.2877
Kocuria	Kocuria rhizophila	0.01324
Kocuria	Kocuria unclassified	0.36885
Lactobacillus	Lactobacillus crispatus	0.14431
Lactobacillus	Lactobacillus curvatus	0.01168
Lactobacillus	Lactobacillus helveticus	0.0054
Lactobacillus	Lactobacillus johnsonii	0.1535
Lactobacillus	Lactobacillus reuteri	0.06871
Lactobacillus	Lactobacillus sakei	0.02232
Lactobacillus	Lactobacillus vaginalis	0.08438
Leifsonia	Leifsonia unclassified	0.03164
Leucobacter	Leucobacter salsicius	0.01798
Leucobacter	Leucobacter unclassified	0.0392
Macrococcus	Macrococcus caseolyticus	0.0426
Marinobacter	Marinobacter unclassified	0.05443
Nocardioides	Nocardioides unclassified	0.01499
Paracoccus	Paracoccus unclassified	0.00369
Peptostreptococcaceae noname	Peptostreptococcaceae noname unclassified	26.5119
Plesiomonas	Plesiomonas shigelloides	21.0397
Pseudomonas	Pseudomonas aeruginosa	0.67555
Pseudomonas	Pseudomonas caeni	1.20783
Psychrobacter	Psychrobacter aquaticus	0.01052
Psychrobacter	Psychrobacter arcticus	0.12525
Psychrobacter	Psychrobacter cryohalolentis	0.32658
Pusillimonas	Pusillimonas unclassified	0.08356
Serinicoccus	Serinicoccus unclassified	0.02545
Solibacillus	Solibacillus silvestris	0.00574
Sphingobacterium	Sphingobacterium unclassified	0.01132
Staphylococcus	Staphylococcus equorum	0.51918
Stenotrophomonas	Stenotrophomonas maltophilia	0.0659
Stenotrophomonas	Stenotrophomonas unclassified	0.01382
Streptococcus	Streptococcus parauberis	1.4068
Turicibacter	Turicibacter sanguinis	0.06487
Turicibacter	Turicibacter unclassified	0.02306
