# Supplementary material for: First metagenomic analysis of the Andean condor (Vultur gryphus) gut microbiome reveals microbial diversity and wide resistome
Source: PeerJ. 2023 Jul 7;11:e15235. doi: 10.7717/peerj.15235 (PMC10332357; doi:10.7717/peerj.15235)
Supplement: Supplemental Information 2 [file peerj-11-15235-s002.xlsx]

## Sheet: FunAnn_MetaCondor_final
query_name	seed_eggNOG_ortholog	seed_ortholog_evalue	seed_ortholog_score	Preferred_name	EC	KEGG_ko	KEGG_Pathway	KEGG_Module	KEGG_Reaction	KEGG_rclass	BRITE	KEGG_TC	CAZy	BiGG_Reaction	COG.Functional.cat.	eggNOG.free.text.desc.	Analysis	AnAccess	Description	InterPro_ann	Interpro_description	GO	Pathways
scaffold_14573_1	1123368.AUIS01000003_gene1613	1.4e-69	270	zraR											T	Bacterial regulatory protein, Fis family	PANTHER, Gene3D, CDD, ProSitePatterns, PANTHER, SMART, SUPERFAMILY, ProSiteProfiles, Pfam	PTHR32071, G3DSA:3.40.50.300, cd00009, PS00675, PTHR32071:SF57, SM00382, SSF52540, PS50045, PF00158	AAA, Sigma-54 interaction domain ATP-binding region A signature, Sigma-54 interaction domain profile, Sigma-54 interaction domain	IPR025662, IPR003593, IPR027417, IPR002078, IPR002078	Sigma-54 interaction domain, ATP-binding site 1, AAA+ ATPase domain, P-loop containing nucleoside triphosphate hydrolase, RNA polymerase sigma factor 54 interaction domain, RNA polymerase sigma factor 54 interaction domain	GO:0005524, GO:0006355, GO:0008134, GO:0005524, GO:0006355, GO:0008134
scaffold_2088_5	1123368.AUIS01000003_gene1613	9.7e-96	357.1	zraR											T	Bacterial regulatory protein, Fis family	PANTHER, CDD, ProSiteProfiles, Pfam, ProSitePatterns, Gene3D, Gene3D, SUPERFAMILY, ProSitePatterns, Pfam, Gene3D, ProSitePatterns, SMART, SUPERFAMILY	PTHR32071, cd00009, PS50045, PF00158, PS00676, G3DSA:1.10.8.60, G3DSA:1.10.10.60, SSF46689, PS00688, PF02954, G3DSA:3.40.50.300, PS00675, SM00382, SSF52540	AAA, Sigma-54 interaction domain profile, Sigma-54 interaction domain, Sigma-54 interaction domain ATP-binding region B signature, Sigma-54 interaction domain C-terminal part signature, Bacterial regulatory protein, Fis family, Sigma-54 interaction domain ATP-binding region A signature.	IPR002078, IPR002078, IPR025943, IPR009057, IPR025944, IPR002197, IPR025662, IPR003593, IPR027417	RNA polymerase sigma factor 54 interaction domain, RNA polymerase sigma factor 54 interaction domain, Sigma-54 interaction domain, ATP-binding site 2, Homeobox-like domain superfamily, Sigma-54 interaction domain, conserved site, DNA binding HTH domain, Fis-type, Sigma-54 interaction domain, ATP-binding site 1, AAA+ ATPase domain, P-loop containing nucleoside triphosphate hydrolase	GO:0005524, GO:0006355, GO:0008134, GO:0005524, GO:0006355, GO:0008134, GO:0003677, GO:0043565
scaffold_21177_2	243159.AFE_3224	1.6e-79	302.4	yhhW		ko:K06911					ko00000				S	Pirin C-terminal cupin domain	PIRSF, PANTHER, PANTHER, Gene3D, SUPERFAMILY, Pfam	PIRSF006232, PTHR13903, PTHR13903:SF18, G3DSA:2.60.120.10, SSF51182, PF02678	Pirin	IPR012093, IPR014710, IPR011051, IPR003829	Pirin, RmlC-like jelly roll fold, RmlC-like cupin domain superfamily, Pirin, N-terminal domain		Reactome: R-HSA-8935690, Reactome: R-HSA-8935690
scaffold_33718_2	243159.AFE_3224	2.2e-51	208.4	yhhW		ko:K06911					ko00000				S	Pirin C-terminal cupin domain	PANTHER, Pfam, PANTHER, SUPERFAMILY, Gene3D	PTHR13903, PF02678, PTHR13903:SF18, SSF51182, G3DSA:2.60.120.10	Pirin	IPR003829, IPR011051, IPR014710	Pirin, N-terminal domain, RmlC-like cupin domain superfamily, RmlC-like jelly roll fold		Reactome: R-HSA-8935690,
scaffold_25463_1	903818.KI912268_gene1938	5.3e-52	211.1												L	DEAD DEAH box helicase	SUPERFAMILY, CDD, Pfam, ProSiteProfiles, SMART	SSF52540, cd17923, PF00270, PS51192, SM00487	DEXHc_Hrq1-like, DEAD/DEAH box helicase, Superfamilies 1 and 2 helicase ATP-binding type-1 domain profile.	IPR027417, IPR011545, IPR014001, IPR014001	P-loop containing nucleoside triphosphate hydrolase, DEAD/DEAH box helicase domain, Helicase superfamily 1/2, ATP-binding domain, Helicase superfamily 1/2, ATP-binding domain	GO:0003676, GO:0005524
scaffold_31507_1	240015.ACP_0649	4.6e-18	97.8												S	AAA domain	SUPERFAMILY, Pfam, CDD, Gene3D	SSF52540, PF13166, cd00267, G3DSA:3.40.50.300	AAA domain, ABC_ATPase	IPR027417, IPR026866	P-loop containing nucleoside triphosphate hydrolase, Protein CR006, P-loop domain
scaffold_36366_1	903818.KI912268_gene1935	6.5e-29	134												L	SNF2 family N-terminal domain	PANTHER, CDD, Gene3D, Coils, PANTHER	PTHR10799, cd18011, G3DSA:3.40.50.10810, Coil, PTHR10799:SF971	DEXDc_RapA	IPR038718	SNF2-like, N-terminal domain superfamily
scaffold_42192_1	903818.KI912268_gene1164	2.4e-22	112.1												O	ATPase family associated with various cellular activities (AAA)	Gene3D, PANTHER, Pfam, SUPERFAMILY, CDD, PANTHER	G3DSA:3.40.50.300, PTHR23077:SF139, PF00004, SSF52540, cd00009, PTHR23077	ATPase family associated with various cellular activities (AAA), AAA	IPR003959, IPR027417	ATPase, AAA-type, core, P-loop containing nucleoside triphosphate hydrolase	GO:0005524
scaffold_50967_1	903818.KI912268_gene1935	3.1e-29	134.8												L	SNF2 family N-terminal domain	Pfam, PANTHER, Gene3D, SUPERFAMILY, ProSiteProfiles, PANTHER, CDD, SMART	PF00271, PTHR10799:SF971, G3DSA:3.40.50.300, SSF52540, PS51194, PTHR10799, cd18793, SM00490	Helicase conserved C-terminal domain, Superfamilies 1 and 2 helicase C-terminal domain profile, SF2_C_SNF	IPR001650, IPR027417, IPR001650, IPR001650	Helicase, C-terminal, P-loop containing nucleoside triphosphate hydrolase, Helicase, C-terminal, Helicase, C-terminal
scaffold_79570_1	234267.Acid_7602	8.6e-18	96.3												G	Glucose / Sorbosone dehydrogenase	NA	NA	NA	NA	NA	na	NA
scaffold_8599_1	234267.Acid_0554	1.6e-40	174.1												O	Beta-propeller repeat	Gene3D, PANTHER, PANTHER, SUPERFAMILY, Pfam, Pfam, Pfam	G3DSA:2.40.10.500, PTHR35580, PTHR35580, SSF101898, PF06739, PF06739, PF06739	Beta-propeller repeat, Beta-propeller repeat, Beta-propeller repeat	IPR010620, IPR010620, IPR010620	Beta-propeller repeat, Beta-propeller repeat, Beta-propeller repeat
scaffold_16716_2	1382359.JIAL01000001_gene588	5.1e-35	154.1												G	Glycosyl hydrolases family 43	CDD, SUPERFAMILY, Gene3D, PANTHER, CDD, Pfam	cd09004, SSF75005, G3DSA:2.115.10.20, PTHR43817, cd18820, PF04616	GH43_bXyl-like, GH43_LbAraf43-like, Glycosyl hydrolases family 43	IPR023296, IPR023296, IPR006710	Glycosyl hydrolase, five-bladed beta-propellor domain superfamily, Glycosyl hydrolase, five-bladed beta-propellor domain superfamily, Glycoside hydrolase, family 43	GO:0004553, GO:0005975
scaffold_23487_1	278963.ATWD01000001_gene1217	6.8e-74	283.9												C	TIGRFAM luciferase family oxidoreductase, group 1	SUPERFAMILY, Gene3D, PANTHER, Pfam, TIGRFAM, PANTHER	SSF51679, G3DSA:3.20.20.30, PTHR30137, PF00296, TIGR03558, PTHR30137:SF6	Luciferase-like monooxygenase, oxido_grp_1: luciferase family oxidoreductase, group 1	IPR036661, IPR036661, IPR011251, IPR019949	Luciferase-like domain superfamily, Luciferase-like domain superfamily, Luciferase-like domain, Luciferase family oxidoreductase, group 1	GO:0016705, GO:0055114, GO:0016705, GO:0055114, GO:0016705, GO:0055114
scaffold_2400_7	1267533.KB906739_gene2622	6.6e-10	71.2	dpo	3.2.2.27	ko:K21929	ko03410,map03410				ko00000,ko00001,ko01000,ko03400				L	TIGRFAM Phage SPO1 DNA polymerase-related protein	PANTHER, SUPERFAMILY, Pfam, Gene3D, PANTHER	PTHR33693:SF7, SSF52141, PF03167, G3DSA:3.40.470.10, PTHR33693	Uracil DNA glycosylase superfamily	IPR036895, IPR005122, IPR036895	Uracil-DNA glycosylase-like domain superfamily, Uracil-DNA glycosylase-like, Uracil-DNA glycosylase-like domain superfamily		Reactome: R-HSA-110328, Reactome: R-HSA-110329, Reactome: R-HSA-110357, Reactome: R-HSA-110328, Reactome: R-HSA-110329, Reactome: R-HSA-110357, Reactome: R-HSA-110328, Reactome: R-HSA-110329, Reactome: R-HSA-110357,
scaffold_24488_2	278963.ATWD01000001_gene1217	6.3e-17	93.2												C	TIGRFAM luciferase family oxidoreductase, group 1	Gene3D, SUPERFAMILY	G3DSA:3.20.20.30, SSF51679		IPR036661, IPR036661	Luciferase-like domain superfamily, Luciferase-like domain superfamily	GO:0016705, GO:0055114, GO:0016705, GO:0055114
scaffold_291_16	1267533.KB906734_gene4073	2e-08	66.2	yorS	3.1.3.5	ko:K01081	ko00230,ko00240,ko00760,ko01100,ko01110,map00230,map00240,map00760,map01100,map01110		R00183,R00511,R00963,R01126,R01227,R01569,R01664,R01968,R02088,R02102,R02323,R02719,R03346	RC00017	ko00000,ko00001,ko01000				S	5 nucleotidase, deoxy (Pyrimidine), cytosolic type C protein (NT5C)	Pfam, SUPERFAMILY, Gene3D, Gene3D	PF06941, SSF56784, G3DSA:3.40.50.1000, G3DSA:1.10.40.40	[5 nucleotidase, deoxy (Pyrimidine), cytosolic type C protein (NT5C)	IPR010708, IPR036412, IPR023214	\5(3)-deoxyribonucleotidase\", HAD-like superfamily, HAD superfamily"	GO:0008253, GO:0009264	Reactome: R-HSA-73621,
scaffold_595_2	1382359.JIAL01000001_gene3000	2.6e-32	147.1												G	PFAM Glycoside hydrolase, family 20, catalytic core	Pfam, SUPERFAMILY, Gene3D, Coils, SUPERFAMILY, PANTHER, Gene3D, PRINTS, PRINTS, PRINTS, PRINTS, PRINTS	PF00728, SSF55545, G3DSA:3.30.379.10, Coil, SSF51445, PTHR22600, G3DSA:3.20.20.80, PR00738, PR00738, PR00738, PR00738, PR00738	Glycosyl hydrolase family 20, catalytic domain, Glycosyl hydrolase family 20 signature, Glycosyl hydrolase family 20 signature, Glycosyl hydrolase family 20 signature, Glycosyl hydrolase family 20 signature, Glycosyl hydrolase family 20 signature	IPR015883, IPR029018, IPR029018, IPR017853, IPR025705, IPR025705, IPR025705, IPR025705, IPR025705	Glycoside hydrolase family 20, catalytic domain, Beta-hexosaminidase-like, domain 2, Beta-hexosaminidase-like, domain 2, Glycoside hydrolase superfamily, Beta-hexosaminidase, Beta-hexosaminidase, Beta-hexosaminidase, Beta-hexosaminidase, Beta-hexosaminidase	GO:0004553, GO:0005975, GO:0004563, GO:0005975, GO:0004563, GO:0005975, GO:0004563, GO:0005975, GO:0004563, GO:0005975, GO:0004563, GO:0005975	KEGG: 00511+3.2.1.52, KEGG: 00513+3.2.1.52, KEGG: 00520+3.2.1.52, KEGG: 00531+3.2.1.52, KEGG: 00603+3.2.1.52, KEGG: 00604+3.2.1.52, MetaCyc: PWY-6902, MetaCyc: PWY-7822, MetaCyc: PWY-7883, KEGG: 00511+3.2.1.52, KEGG: 00513+3.2.1.52, KEGG: 00520+3.2.1.52, KEGG: 00531+3.2.1.52, KEGG: 00603+3.2.1.52, KEGG: 00604+3.2.1.52, MetaCyc: PWY-6902, MetaCyc: PWY-7822, MetaCyc: PWY-7883, Reactome: R-HSA-16606…
scaffold_7_35	278963.ATWD01000001_gene1217	8e-111	407.1												C	TIGRFAM luciferase family oxidoreductase, group 1	PANTHER, TIGRFAM, SUPERFAMILY, Gene3D, CDD, PANTHER, Pfam	PTHR30137, TIGR03558, SSF51679, G3DSA:3.20.20.30, cd00347, PTHR30137:SF6, PF00296	oxido_grp_1: luciferase family oxidoreductase, group 1, Flavin_utilizing_monoxygenases, Luciferase-like monooxygenase	IPR019949, IPR036661, IPR036661, IPR011251	Luciferase family oxidoreductase, group 1, Luciferase-like domain superfamily, Luciferase-like domain superfamily, Luciferase-like domain	GO:0016705, GO:0055114, GO:0016705, GO:0055114, GO:0016705, GO:0055114
scaffold_70034_1	1382359.JIAL01000001_gene1410	5.2e-27	127.1	lacZ	3.2.1.23	ko:K01190	ko00052,ko00511,ko00600,ko01100,map00052,map00511,map00600,map01100		R01105,R01678,R03355,R04783,R06114	RC00049,RC00452	ko00000,ko00001,ko01000				G	PFAM Glycoside hydrolase, family 2, TIM barrel	PANTHER, SUPERFAMILY, Pfam, Gene3D, PANTHER	PTHR42732, SSF49785, PF02837, G3DSA:2.60.120.260, PTHR42732:SF1	Glycosyl hydrolases family 2, sugar binding domain	IPR008979, IPR006104, IPR008979	Galactose-binding-like domain superfamily, Glycosyl hydrolases family 2, sugar binding domain, Galactose-binding-like domain superfamily	GO:0004553, GO:0005975	KEGG: 00052+3.2.1.23, KEGG: 00511+3.2.1.23, KEGG: 00531+3.2.1.23, KEGG: 00600+3.2.1.23, KEGG: 00604+3.2.1.23, MetaCyc: PWY-6807,
scaffold_10756_1	1448389.BAVQ01000023_gene1409	3.9e-13	80.9	ku		ko:K10979	ko03450,map03450				ko00000,ko00001,ko03400				L	With LigD forms a non-homologous end joining (NHEJ) DNA repair enzyme, which repairs dsDNA breaks with reduced fidelity. Binds linear dsDNA with 5- and 3- overhangs but not closed circular dsDNA nor ssDNA. Recruits and stimulates the ligase activity of LigD	MobiDBLite, PANTHER, SUPERFAMILY, MobiDBLite	mobidb-lite, PTHR41251, SSF100939, mobidb-lite	consensus disorder prediction, consensus disorder prediction	IPR009187, IPR016194	Non-homologous end joining protein Ku, prokaryotic type, SPOC-like, C-terminal domain superfamily
scaffold_10756_2	1448389.BAVQ01000023_gene1499	7.2e-153	546.6	galU	2.7.7.9	ko:K00963	ko00040,ko00052,ko00500,ko00520,ko01100,ko01130,map00040,map00052,map00500,map00520,map01100,map01130	M00129,M00361,M00362,M00549	R00289	RC00002	ko00000,ko00001,ko00002,ko01000				M	Utp--glucose-1-phosphate uridylyltransferase	Gene3D, PANTHER, CDD, SUPERFAMILY, Pfam, PANTHER	G3DSA:3.90.550.10, PTHR43197, cd02541, SSF53448, PF00483, PTHR43197:SF1	UGPase_prokaryotic, Nucleotidyl transferase	IPR029044, IPR005771, IPR005771, IPR029044, IPR005835	Nucleotide-diphospho-sugar transferases, UTP--glucose-1-phosphate uridylyltransferase, bacterial/archaeal-type, UTP--glucose-1-phosphate uridylyltransferase, bacterial/archaeal-type, Nucleotide-diphospho-sugar transferases, Nucleotidyl transferase domain	GO:0003983, GO:0006011, GO:0003983, GO:0006011, GO:0009058, GO:0016779	KEGG: 00040+2.7.7.9, KEGG: 00052+2.7.7.9, KEGG: 00500+2.7.7.9, KEGG: 00520+2.7.7.9, KEGG: 00561+2.7.7.9, MetaCyc: PWY-3801, MetaCyc: PWY-6527, MetaCyc: PWY-7238, MetaCyc: PWY-7343, MetaCyc: PWY-7817, KEGG: 00040+2.7.7.9, KEGG: 00052+2.7.7.9, KEGG: 00500+2.7.7.9, KEGG: 00520+2.7.7.9, KEGG: 00561+2.7.7.9, MetaCyc: PWY-3801, MetaCyc: PWY-6527, MetaCyc: PWY-7238, MetaCyc: PWY-7343, MetaCyc: PWY-7817,
scaffold_11426_1	1157638.KB892159_gene5851	9.1e-41	173.3												K	Arac family	Gene3D, SUPERFAMILY, SUPERFAMILY, PANTHER, Pfam, PRINTS, PRINTS, ProSiteProfiles, PANTHER, SMART	G3DSA:1.10.10.60, SSF46689, SSF46689, PTHR11019, PF12833, PR00032, PR00032, PS01124, PTHR11019:SF199, SM00342	Helix-turn-helix domain, AraC bacterial regulatory protein HTH signature, AraC bacterial regulatory protein HTH signature, Bacterial regulatory proteins, araC family DNA-binding domain profile.	IPR009057, IPR009057, IPR018060, IPR020449, IPR020449, IPR018060, IPR018060	Homeobox-like domain superfamily, Homeobox-like domain superfamily, DNA binding HTH domain, AraC-type, Transcription regulator HTH, AraC- type, Transcription regulator HTH, AraC- type, DNA binding HTH domain, AraC-type, DNA binding HTH domain, AraC-type	GO:0003677, GO:0003677, GO:0003700, GO:0006355, GO:0043565, GO:0003700, GO:0006355, GO:0003700, GO:0006355, GO:0003700, GO:0006355, GO:0043565, GO:0003700, GO:0006355, GO:0043565
scaffold_11498_1	1448389.BAVQ01000013_gene4040	1.4e-11	74.7			ko:K01998	ko02010,ko02024,map02010,map02024	M00237			ko00000,ko00001,ko00002,ko02000	3.A.1.4			I	Alpha beta hydrolase	Gene3D	G3DSA:3.40.50.1820		IPR029058	Alpha/Beta hydrolase fold
scaffold_11498_2	1448389.BAVQ01000073_gene2131	5.7e-137	493.8												KLT	serine threonine protein kinase	ProSitePatterns, CDD, SMART, Gene3D, ProSiteProfiles, PANTHER, PANTHER, SUPERFAMILY, Gene3D, Pfam, ProSitePatterns	PS00107, cd14014, SM00220, G3DSA:3.30.200.20, PS50011, PTHR43289, PTHR43289:SF11, SSF56112, G3DSA:1.10.510.10, PF00069, PS00108	Protein kinases ATP-binding region signature, STKc_PknB_like, Protein kinase domain profile, Protein kinase domain, Serine/Threonine protein kinases active-site signature.	IPR017441, IPR000719, IPR000719, IPR011009, IPR000719, IPR008271	Protein kinase, ATP binding site, Protein kinase domain, Protein kinase domain, Protein kinase-like domain superfamily, Protein kinase domain, Serine/threonine-protein kinase, active site	GO:0005524, GO:0004672, GO:0005524, GO:0006468, GO:0004672, GO:0005524, GO:0006468, GO:0004672, GO:0005524, GO:0006468, GO:0004672, GO:0006468
scaffold_11987_1	398513.BBNG_01583	9.4e-105	387.1	nagH	3.2.1.35,3.2.1.52	ko:K01197,ko:K02022,ko:K12373	ko00511,ko00513,ko00520,ko00531,ko00603,ko00604,ko01100,ko04142,map00511,map00513,map00520,map00531,map00603,map00604,map01100,map04142	M00076,M00077,M00079	R00022,R06004,R07824,R07825,R10905,R11316	RC00049	ko00000,ko00001,ko00002,ko00536,ko00537,ko01000,ko02042,ko03110		GH20		G	beta-N-acetylglucosaminidase	Pfam, PANTHER, Gene3D, SUPERFAMILY, Gene3D, Gene3D, SUPERFAMILY, PANTHER	PF07555, PTHR13170:SF15, G3DSA:1.20.58.460, SSF140657, G3DSA:3.20.20.80, G3DSA:2.60.120.260, SSF51445, PTHR13170	beta-N-acetylglucosaminidase	IPR011496, IPR008979, IPR017853	Beta-N-acetylglucosaminidase, Galactose-binding-like domain superfamily, Glycoside hydrolase superfamily		MetaCyc: PWY-7437,
scaffold_12215_1	1095772.CAHH01000015_gene1042	2.7e-104	384.8	fhaA		ko:K02283					ko00000,ko02035,ko02044				T	(FHA) domain	Pfam, PANTHER, Pfam, Gene3D, ProSiteProfiles, SUPERFAMILY, PANTHER, CDD, SMART, Gene3D	PF16697, PTHR23308, PF12401, G3DSA:3.30.2320.60, PS50006, SSF49879, PTHR23308:SF47, cd00060, SM00240, G3DSA:2.60.200.20	Inner membrane component of T3SS, cytoplasmic domain, Protein of unknown function (DUF2662), Forkhead-associated (FHA) domain profile, FHA	IPR032030, IPR022128, IPR042287, IPR000253, IPR008984, IPR000253, IPR000253	YscD, cytoplasmic domain, Domain of unknown function DUF3662, FhaA, N-terminal, Forkhead-associated (FHA) domain, SMAD/FHA domain superfamily, Forkhead-associated (FHA) domain, Forkhead-associated (FHA) domain	GO:0003674, GO:0003676, GO:0003723, GO:0003729, GO:0005488, GO:0005575, GO:0005618, GO:0005622, GO:0005623, GO:0005737, GO:0005829, GO:0030312, GO:0044424, GO:0044444, GO:0044464, GO:0071944, GO:0097159, GO:1901363GO:0005515, GO:0005515, GO:0005515, GO:0005515
scaffold_12338_1	1448389.BAVQ01000022_gene1591	1.8e-153	548.9												I	acyl-CoA dehydrogenase	PANTHER, SUPERFAMILY, Gene3D, Gene3D, Pfam, SUPERFAMILY, Pfam, PANTHER	PTHR43884, SSF56645, G3DSA:1.20.140.10, G3DSA:1.10.540.10, PF00441, SSF47203, PF02771, PTHR43884:SF20	Acyl-CoA dehydrogenase, C-terminal domain, Acyl-CoA dehydrogenase, N-terminal domain	IPR009100, IPR037069, IPR009075, IPR036250, IPR013786	Acyl-CoA dehydrogenase/oxidase, N-terminal and middle domain superfamily, Acyl-CoA dehydrogenase/oxidase, N-terminal domain superfamily, Acyl-CoA dehydrogenase/oxidase C-terminal, Acyl-CoA dehydrogenase-like, C-terminal, Acyl-CoA dehydrogenase/oxidase, N-terminal	GO:0016627, GO:0055114, GO:0016627, GO:0050660, GO:0055114, GO:0016627, GO:0055114, GO:0016627, GO:0055114, GO:0016627, GO:0050660, GO:0055114
scaffold_12527_1	754252.PFREUD_09020	5.9e-70	270.4	dhaB	4.2.1.28,4.2.1.30	ko:K01699,ko:K06120	ko00561,ko00640,map00561,map00640		R01047,R02376	RC00429,RC00707	ko00000,ko00001,ko01000				Q	Dehydratase large subunit	Gene3D, SUPERFAMILY, Pfam	G3DSA:3.20.20.350, SSF51703, PF02286	Dehydratase large subunit	IPR036999, IPR016176, IPR003206	Diol/glycerol dehydratase, large subunit superfamily, Cobalamin (vitamin B12)-dependent enzyme, catalytic, Diol/glycerol dehydratase, large subunit	GO:0016836, GO:0031419, GO:0003824, GO:0031419, GO:0016836, GO:0031419	Reactome: R-HSA-196741, Reactome: R-HSA-3359475, Reactome: R-HSA-3359478, Reactome: R-HSA-71032,
scaffold_12883_1	1448389.BAVQ01000015_gene4131	6.1e-114	417.5	traA											L	DNA-dependent ATPase and ATP-dependent 5-3 DNA helicase. Has no activity on blunt DNA or DNA with 3-overhangs, requires at least 10 bases of 5-ssDNA for helicase activity	Gene3D, CDD, Gene3D, SUPERFAMILY	G3DSA:2.30.30.940, cd18809, G3DSA:3.40.50.300, SSF52540	SF1_C_RecD	IPR027417	P-loop containing nucleoside triphosphate hydrolase
scaffold_12988_1	1448389.BAVQ01000048_gene1131	6.4e-48	196.4			ko:K07483					ko00000				L	PFAM transposase IS3 IS911 family protein	Gene3D, SUPERFAMILY, PANTHER, Coils	G3DSA:1.10.10.10, SSF46689, PTHR33215, Coil		IPR036388, IPR009057	Winged helix-like DNA-binding domain superfamily, Homeobox-like domain superfamily	GO:0003677
scaffold_12988_2	1448389.BAVQ01000048_gene1132	5.6e-69	266.9												L	PFAM Integrase catalytic	NA	NA	NA	NA	NA	na	NA
scaffold_13103_1	446469.Sked_02840	1e-28	132.5			ko:K17319	ko02010,map02010	M00603			ko00000,ko00001,ko00002,ko02000	3.A.1.1.29,3.A.1.1.9			G	Binding-protein-dependent transport systems inner membrane component	SUPERFAMILY, PANTHER, TMHMM, Gene3D, TMHMM, PANTHER	SSF161098, PTHR43227:SF10, TMhelix, G3DSA:1.10.3720.10, TMhelix, PTHR43227	Region of a membrane-bound protein predicted to be embedded in the membrane, Region of a membrane-bound protein predicted to be embedded in the membrane.	IPR035906, IPR035906	MetI-like superfamily, MetI-like superfamily
scaffold_13279_1	443218.AS9A_4302	3.4e-102	377.9	yedK											S	Belongs to the SOS response-associated peptidase family	SUPERFAMILY, PANTHER, Pfam, Gene3D	SSF143081, PTHR13604, PF02586, G3DSA:3.90.1680.10	SOS response associated peptidase (SRAP)	IPR036590, IPR003738, IPR003738, IPR036590	SOS response associated peptidase-like, SOS response associated peptidase (SRAP), SOS response associated peptidase (SRAP), SOS response associated peptidase-like
scaffold_13357_1	443218.AS9A_P10007	9.1e-51	207.2	parA		ko:K03496					ko00000,ko03036,ko04812				D	chromosome partitioning	CDD, Gene3D, Pfam, SUPERFAMILY, PIRSF, PIRSF, CDD, PANTHER	cd02035, G3DSA:3.40.50.300, PF13614, SSF52540, PIRSF009320, PIRSF009320, cd02042, PTHR13696	ArsA, AAA domain, ParAB_family	IPR025669, IPR027417	AAA domain, P-loop containing nucleoside triphosphate hydrolase
scaffold_13698_1	1448389.BAVQ01000025_gene1243	3e-174	617.8	fadB	1.1.1.35,4.2.1.17,5.1.2.3	ko:K01782	ko00071,ko00280,ko00281,ko00310,ko00362,ko00380,ko00410,ko00640,ko00650,ko00903,ko00930,ko01040,ko01100,ko01110,ko01120,ko01130,ko01200,ko01212,map00071,map00280,map00281,map00310,map00362,map00380,map00410,map00640,map00650,map00903,map00930,map01040,map01100,map01110,map01120,map01130,map01200,map01212	M00032,M00087	R01975,R03026,R03045,R03276,R04137,R04170,R04203,R04204,R04224,R04737,R04738,R04739,R04740,R04741,R04744,R04745,R04746,R04748,R04749,R05066,R05305,R06411,R06412,R06941,R06942,R07935,R07951,R08093,R08094	RC00029,RC00099,RC00117,RC00241,RC00525,RC00831,RC00834,RC00896,RC01086,RC01095,RC01098,RC01103,RC01217,RC02115	ko00000,ko00001,ko00002,ko01000				I	3-hydroxyacyl-CoA dehydrogenase	Gene3D, Gene3D, SUPERFAMILY, PANTHER, PANTHER, Gene3D, SUPERFAMILY, Pfam, Pfam, PIRSF	G3DSA:3.40.50.720, G3DSA:3.90.226.10, SSF48179, PTHR43612:SF3, PTHR43612, G3DSA:1.10.1040.50, SSF51735, PF02737, PF00725, PIRSF000105	3-hydroxyacyl-CoA dehydrogenase, NAD binding domain, 3-hydroxyacyl-CoA dehydrogenase, C-terminal domain	IPR008927, IPR036291, IPR006176, IPR006108, IPR022694	6-phosphogluconate dehydrogenase-like, C-terminal domain superfamily, NAD(P)-binding domain superfamily, 3-hydroxyacyl-CoA dehydrogenase, NAD binding, 3-hydroxyacyl-CoA dehydrogenase, C-terminal, 3-hydroxyacyl-CoA dehydrogenase	GO:0055114, GO:0003857, GO:0006631, GO:0016491, GO:0055114, GO:0003857, GO:0006631, GO:0016491, GO:0055114, GO:0003857, GO:0006631, GO:0055114, GO:0070403	KEGG: 00062+4.2.1.17+1.1.1.35, KEGG: 00071+4.2.1.17+1.1.1.35, KEGG: 00280+4.2.1.17+1.1.1.35, KEGG: 00281+4.2.1.17+1.1.1.35, KEGG: 00310+4.2.1.17+1.1.1.35, KEGG: 00360+4.2.1.17, KEGG: 00362+4.2.1.17+1.1.1.35, KEGG: 00380+4.2.1.17+1.1.1.35, KEGG: 00410+4.2.1.17, KEGG: 00592+4.2.1.17, KEGG: 00623+1.1.1.35, KEGG: 00627+4.2.1.17, KEGG: 00640+4.2.1.17, KEGG: 00650+4.2.1.17+1.1.1.35, KEGG: 00720+4.2.1.1…
scaffold_13721_1	196162.Noca_1588	9.9e-154	549.7		2.1.1.72,3.1.21.3,3.1.21.4	ko:K01153,ko:K01155,ko:K03427,ko:K09384					ko00000,ko01000,ko02048				L	Type I site-specific restriction-modification system, R (Restriction) subunit and related	ProSiteProfiles, SMART, Gene3D, SUPERFAMILY, CDD, Pfam	PS51192, SM00487, G3DSA:3.40.50.300, SSF52540, cd18011, PF04851	Superfamilies 1 and 2 helicase ATP-binding type-1 domain profile, DEXDc_RapA, Type III restriction enzyme, res subunit	IPR014001, IPR014001, IPR027417, IPR006935	Helicase superfamily 1/2, ATP-binding domain, Helicase superfamily 1/2, ATP-binding domain, P-loop containing nucleoside triphosphate hydrolase, Helicase/UvrB, N-terminal	GO:0003677, GO:0005524, GO:0016787
scaffold_13741_4	1292020.H483_0110455	6.9e-13	79.7	parA		ko:K03496					ko00000,ko03036,ko04812				D	COG1192 ATPases involved in chromosome partitioning	NA	NA	NA	NA	NA	na	NA
scaffold_14039_1	66874.JOFS01000004_gene5317	4.7e-43	181.4												L	viral genome integration into host DNA	Gene3D, SUPERFAMILY	G3DSA:1.10.443.10, SSF56349		IPR013762, IPR011010	Integrase-like, catalytic domain superfamily, DNA breaking-rejoining enzyme, catalytic core	GO:0003677, GO:0006310, GO:0015074, GO:0003677
scaffold_14436_1	1448389.BAVQ01000080_gene489	2.7e-54	218.4	ppiB	5.2.1.8	ko:K01802,ko:K03768					ko00000,ko01000,ko03110				O	PPIases accelerate the folding of proteins. It catalyzes the cis-trans isomerization of proline imidic peptide bonds in oligopeptides	PANTHER, SignalP_GRAM_POSITIVE, SignalP_GRAM_NEGATIVE, SUPERFAMILY, SignalP_EUK, PANTHER, Pfam, Gene3D	PTHR45625:SF3, SignalP-TM, SignalP-noTM, SSF50891, SignalP-noTM, PTHR45625, PF00160, G3DSA:2.40.100.10	Cyclophilin type peptidyl-prolyl cis-trans isomerase/CLD	IPR029000, IPR002130, IPR029000	Cyclophilin-like domain superfamily, Cyclophilin-type peptidyl-prolyl cis-trans isomerase domain, Cyclophilin-like domain superfamily	GO:0000413, GO:0003755
scaffold_14436_2	1448389.BAVQ01000080_gene488	4.2e-53	213.8	ycbL	3.1.2.6	ko:K01069	ko00620,map00620		R01736	RC00004,RC00137	ko00000,ko00001,ko01000				S	domain protein	CDD, Pfam, Gene3D, PANTHER, PANTHER, SUPERFAMILY	cd06262, PF00753, G3DSA:3.60.15.10, PTHR46233, PTHR46233:SF3, SSF56281	metallo-hydrolase-like_MBL-fold, Metallo-beta-lactamase superfamily	IPR001279, IPR036866, IPR036866	Metallo-beta-lactamase, Ribonuclease Z/Hydroxyacylglutathione hydrolase-like, Ribonuclease Z/Hydroxyacylglutathione hydrolase-like
scaffold_15010_1	1448389.BAVQ01000002_gene2932	2.7e-54	218	mscL		ko:K03282					ko00000,ko02000	1.A.22.1			M	Channel that opens in response to stretch forces in the membrane lipid bilayer. May participate in the regulation of osmotic pressure changes within the cell	Gene3D, SUPERFAMILY, Pfam, TMHMM, TMHMM, PANTHER	G3DSA:1.10.1200.120, SSF81330, PF01741, TMhelix, TMhelix, PTHR30266	Large-conductance mechanosensitive channel, MscL, Region of a membrane-bound protein predicted to be embedded in the membrane, Region of a membrane-bound protein predicted to be embedded in the membrane.	IPR036019, IPR036019, IPR037673, IPR037673	Gated mechanosensitive channel, Gated mechanosensitive channel, Large-conductance mechanosensitive channel/anditomin synthesis protein L, Large-conductance mechanosensitive channel/anditomin synthesis protein L	GO:0003674, GO:0005215, GO:0005488, GO:0005515, GO:0005575, GO:0005623, GO:0005886, GO:0005887, GO:0006810, GO:0006811, GO:0006884, GO:0008150, GO:0008361, GO:0008381, GO:0009987, GO:0009992, GO:0015267, GO:0016020, GO:0016021, GO:0016043, GO:0019725, GO:0022803, GO:0022836, GO:0022857, GO:0030104, GO:0031224, GO:0031226, GO:0032535, GO:0042592, GO:0042802, GO:0044425, GO:0044459, GO:0044464, GO:…
scaffold_15244_1	1448389.BAVQ01000015_gene4142	2.3e-157	561.6												L	helicase	ProSitePatterns, Gene3D, SUPERFAMILY	PS00092, G3DSA:3.40.50.150, SSF53335	N-6 Adenine-specific DNA methylases signature.	IPR002052, IPR029063	DNA methylase, N-6 adenine-specific, conserved site, S-adenosyl-L-methionine-dependent methyltransferase	GO:0003676, GO:0008168, GO:0032259
scaffold_15432_1	1448389.BAVQ01000004_gene3721	1.5e-88	332.4												K	transcriptional regulator	PANTHER, PANTHER, Gene3D, ProSiteProfiles, SUPERFAMILY, Pfam	PTHR30136:SF24, PTHR30136, G3DSA:3.30.450.40, PS51078, SSF55781, PF01614	IclR effector binding domain profile, Bacterial transcriptional regulator	IPR029016, IPR014757, IPR014757	GAF-like domain superfamily, Transcription regulator IclR, C-terminal, Transcription regulator IclR, C-terminal
scaffold_15615_1	1448389.BAVQ01000072_gene2555	5.7e-112	410.2		3.1.2.6	ko:K01069	ko00620,map00620		R01736	RC00004,RC00137	ko00000,ko00001,ko01000				S	Zn-dependent	SMART, SUPERFAMILY, CDD, PANTHER, Pfam, Gene3D, PANTHER	SM00849, SSF56281, cd06262, PTHR46233, PF00753, G3DSA:3.60.15.10, PTHR46233:SF4	metallo-hydrolase-like_MBL-fold, Metallo-beta-lactamase superfamily	IPR001279, IPR036866, IPR001279, IPR036866	Metallo-beta-lactamase, Ribonuclease Z/Hydroxyacylglutathione hydrolase-like, Metallo-beta-lactamase, Ribonuclease Z/Hydroxyacylglutathione hydrolase-like
scaffold_15615_2	1448389.BAVQ01000072_gene2556	4.1e-24	117.1	yiiM											C	PFAM MOSC domain containing protein	MobiDBLite, PANTHER, SUPERFAMILY, Pfam, Gene3D, ProSiteProfiles	mobidb-lite, PTHR30212, SSF50800, PF03473, G3DSA:2.40.33.20, PS51340	consensus disorder prediction, MOSC domain, MOSC domain profile.	IPR011037, IPR005302, IPR005302	Pyruvate kinase-like, insert domain superfamily, Molybdenum cofactor sulfurase, C-terminal, Molybdenum cofactor sulfurase, C-terminal	GO:0005575, GO:0005622, GO:0005623, GO:0005737, GO:0005829, GO:0008150, GO:0008152, GO:0009056, GO:0009404, GO:0009407, GO:0009636, GO:0009987, GO:0019748, GO:0042221, GO:0044237, GO:0044248, GO:0044424, GO:0044444, GO:0044464, GO:0050896, GO:0098754GO:0003824, GO:0030151, GO:0030170, GO:0003824, GO:0030151, GO:0030170
scaffold_15876_1	1101188.KI912155_gene3057	4.7e-155	553.9												E	oxidoreductase	Pfam, PANTHER, PANTHER, SUPERFAMILY, SUPERFAMILY	PF00732, PTHR46056:SF4, PTHR46056, SSF51905, SSF54373	GMC oxidoreductase	IPR000172, IPR036188	Glucose-methanol-choline oxidoreductase, N-terminal, FAD/NAD(P)-binding domain superfamily	GO:0016614, GO:0050660, GO:0055114	Reactome: R-HSA-6798163,
scaffold_159_24	78344.BIGA_0454	1.2e-55	224.2														Coils	Coil
scaffold_16007_1	1448389.BAVQ01000005_gene3028	3.7e-136	491.1	metXA	2.3.1.31	ko:K00641	ko00270,ko01100,ko01130,map00270,map01100,map01130		R01776	RC00004,RC00041	ko00000,ko00001,ko01000				E	Transfers an acetyl group from acetyl-CoA to L- homoserine, forming acetyl-L-homoserine	Gene3D, Pfam, TIGRFAM, SUPERFAMILY, PIRSF, PANTHER, Gene3D, PANTHER, Hamap	G3DSA:1.10.1740.110, PF00561, TIGR01392, SSF53474, PIRSF000443, PTHR32268:SF11, G3DSA:3.40.50.1820, PTHR32268, MF_00296	alpha/beta hydrolase fold, homoserO_Ac_trn: homoserine O-acetyltransferase, Homoserine O-acetyltransferase [metXA].	IPR000073, IPR008220, IPR029058, IPR008220, IPR029058, IPR008220, IPR008220	Alpha/beta hydrolase fold-1, Homoserine/serine acetyltransferase MetX-like, Alpha/Beta hydrolase fold, Homoserine/serine acetyltransferase MetX-like, Alpha/Beta hydrolase fold, Homoserine/serine acetyltransferase MetX-like, Homoserine/serine acetyltransferase MetX-like	GO:0000096, GO:0000097, GO:0003674, GO:0003824, GO:0004414, GO:0005575, GO:0005623, GO:0005886, GO:0006082, GO:0006520, GO:0006555, GO:0006790, GO:0006807, GO:0008150, GO:0008152, GO:0008374, GO:0008652, GO:0009058, GO:0009066, GO:0009067, GO:0009069, GO:0009086, GO:0009092, GO:0009987, GO:0016020, GO:0016053, GO:0016407, GO:0016413, GO:0016740, GO:0016746, GO:0016747, GO:0019752, GO:0040007, GO:…
scaffold_16053_1	471856.Jden_2321	1.9e-18	100.1												S	Fibronectin type 3 domain	ProSiteProfiles, SUPERFAMILY, Gene3D	PS50853, SSF49265, G3DSA:2.60.40.10	Fibronectin type-III domain profile.	IPR003961, IPR036116, IPR013783	Fibronectin type III, Fibronectin type III superfamily, Immunoglobulin-like fold	GO:0005515, GO:0005515
scaffold_16228_1	1403948.Q618_VCMC00003G0140	3e-11	75.5														Coils, Coils	Coil, Coil
scaffold_16251_1	1292020.H483_0110465	4.2e-07	62.4	traA											L	DNA-dependent ATPase and ATP-dependent 5-3 DNA helicase. Has no activity on blunt DNA or DNA with 3-overhangs, requires at least 10 bases of 5-ssDNA for helicase activity	MobiDBLite	mobidb-lite	consensus disorder prediction
scaffold_16460_1	1155718.KB891866_gene586	5.4e-12	75.9												G	Hydrolase	NA	NA	NA	NA	NA	na	NA
scaffold_16460_2	1448389.BAVQ01000043_gene1732	1.4e-115	422.5	yxnA											S	Belongs to the short-chain dehydrogenases reductases (SDR) family	ProSitePatterns, Gene3D, PANTHER, SUPERFAMILY, PRINTS, PRINTS, PRINTS, PRINTS, PRINTS, PANTHER, SMART, Pfam	PS00061, G3DSA:3.40.50.720, PTHR43391:SF51, SSF51735, PR00081, PR00081, PR00081, PR00081, PR00081, PTHR43391, SM00822, PF00106	Short-chain dehydrogenases/reductases family signature, Glucose/ribitol dehydrogenase family signature, Glucose/ribitol dehydrogenase family signature, Glucose/ribitol dehydrogenase family signature, Glucose/ribitol dehydrogenase family signature, Glucose/ribitol dehydrogenase family signature, This enzymatic domain is part of bacterial polyketide synthases and catalyses the first step in the red…	IPR020904, IPR036291, IPR002347, IPR002347, IPR002347, IPR002347, IPR002347, IPR002347	Short-chain dehydrogenase/reductase, conserved site, NAD(P)-binding domain superfamily, Short-chain dehydrogenase/reductase SDR, Short-chain dehydrogenase/reductase SDR, Short-chain dehydrogenase/reductase SDR, Short-chain dehydrogenase/reductase SDR, Short-chain dehydrogenase/reductase SDR, Short-chain dehydrogenase/reductase SDR	GO:0016491
scaffold_16867_1	1448389.BAVQ01000036_gene843	6.3e-23	113.6												S	Putative Actinobacterial Holin-X, holin superfamily III	MobiDBLite, TMHMM, TMHMM, Pfam	mobidb-lite, TMhelix, TMhelix, PF07332	consensus disorder prediction, Region of a membrane-bound protein predicted to be embedded in the membrane, Region of a membrane-bound protein predicted to be embedded in the membrane, Putative Actinobacterial Holin-X, holin superfamily III	IPR009937	Putative Actinobacterial Holin-X, holin superfamily III
scaffold_16867_2	1448389.BAVQ01000036_gene842	1e-85	322.8												I	Alpha beta hydrolase	PRINTS, PRINTS, PRINTS, SUPERFAMILY, PRINTS, PRINTS, PRINTS, PRINTS, Gene3D, Pfam, PANTHER	PR00111, PR00111, PR00111, SSF53474, PR00412, PR00412, PR00412, PR00412, G3DSA:3.40.50.1820, PF00561, PTHR43329	Alpha/beta hydrolase fold signature, Alpha/beta hydrolase fold signature, Alpha/beta hydrolase fold signature, Epoxide hydrolase signature, Epoxide hydrolase signature, Epoxide hydrolase signature, Epoxide hydrolase signature, alpha/beta hydrolase fold	IPR000073, IPR000073, IPR000073, IPR029058, IPR000639, IPR000639, IPR000639, IPR000639, IPR029058, IPR000073	Alpha/beta hydrolase fold-1, Alpha/beta hydrolase fold-1, Alpha/beta hydrolase fold-1, Alpha/Beta hydrolase fold, Epoxide hydrolase-like, Epoxide hydrolase-like, Epoxide hydrolase-like, Epoxide hydrolase-like, Alpha/Beta hydrolase fold, Alpha/beta hydrolase fold-1	GO:0003824, GO:0003824, GO:0003824, GO:0003824
scaffold_17284_2	1292020.H483_0110285	6.5e-19	99.4	fieF											P	Belongs to the cation diffusion facilitator (CDF) transporter (TC 2.A.4) family	Pfam, Gene3D, PANTHER, TMHMM, PANTHER, TMHMM, SUPERFAMILY	PF01545, G3DSA:1.20.1510.10, PTHR43840, TMhelix, PTHR43840:SF15, TMhelix, SSF161111	Cation efflux family, Region of a membrane-bound protein predicted to be embedded in the membrane, Region of a membrane-bound protein predicted to be embedded in the membrane.	IPR002524, IPR027469, IPR027469	Cation efflux protein, Cation efflux transmembrane domain superfamily, Cation efflux transmembrane domain superfamily	GO:0006812, GO:0008324, GO:0016021, GO:0055085
scaffold_17690_1	1448389.BAVQ01000043_gene1774	6.3e-146	523.5	fas	2.3.1.179	ko:K09458,ko:K11533	ko00061,ko00780,ko01100,ko01212,ko04931,map00061,map00780,map01100,map01212,map04931	M00082,M00083,M00572	R01624,R01626,R04355,R04428,R04429,R04533,R04534,R04535,R04536,R04537,R04543,R04544,R04566,R04568,R04724,R04726,R04952,R04953,R04954,R04955,R04957,R04958,R04960,R04961,R04963,R04964,R04965,R04966,R04968,R04969,R07762,R07763,R07764,R07765,R10115,R10119,R10700	RC00004,RC00029,RC00039,RC00052,RC00076,RC00117,RC00831,RC01095,RC02727,RC02728,RC02729,RC02857,RC02888	ko00000,ko00001,ko00002,ko01000,ko01004				I	capsule polysaccharide biosynthetic process	Gene3D, Pfam, SUPERFAMILY, PANTHER, PANTHER, Pfam, PRINTS, PRINTS, PRINTS, PRINTS, PRINTS, PANTHER, PANTHER, Gene3D, SUPERFAMILY	G3DSA:3.40.366.10, PF01575, SSF52151, PTHR10982, PTHR10982, PF00698, PR01483, PR01483, PR01483, PR01483, PR01483, PTHR10982:SF21, PTHR10982:SF21, G3DSA:3.10.129.10, SSF54637	MaoC like domain, Acyl transferase domain, Fatty acid synthase signature, Fatty acid synthase signature, Fatty acid synthase signature, Fatty acid synthase signature, Fatty acid synthase signature	IPR001227, IPR002539, IPR016035, IPR014043, IPR003965, IPR003965, IPR003965, IPR003965, IPR003965, IPR029069	Acyl transferase domain superfamily, MaoC-like dehydratase domain, Acyl transferase/acyl hydrolase/lysophospholipase, Acyl transferase, Fatty acid synthase, Fatty acid synthase, Fatty acid synthase, Fatty acid synthase, Fatty acid synthase, HotDog domain superfamily	GO:0016740, GO:0004312, GO:0005835, GO:0006633, GO:0055114, GO:0004312, GO:0005835, GO:0006633, GO:0055114, GO:0004312, GO:0005835, GO:0006633, GO:0055114, GO:0004312, GO:0005835, GO:0006633, GO:0055114, GO:0004312, GO:0005835, GO:0006633, GO:0055114
scaffold_17749_1	1077144.AGFF01000024_gene246	2.3e-38	165.6												S	Terminase	MobiDBLite	mobidb-lite	consensus disorder prediction
scaffold_17839_2	471856.Jden_2321	2.7e-13	82.4												S	Fibronectin type 3 domain	CDD, SUPERFAMILY, ProSiteProfiles, Gene3D	cd00063, SSF49265, PS50853, G3DSA:2.60.40.10	FN3, Fibronectin type-III domain profile.	IPR003961, IPR036116, IPR003961, IPR013783	Fibronectin type III, Fibronectin type III superfamily, Fibronectin type III, Immunoglobulin-like fold	GO:0005515, GO:0005515, GO:0005515
scaffold_17874_1	1448389.BAVQ01000070_gene2194	2.3e-132	478.4												IQ	Catalyzes the first of the two reduction steps in the elongation cycle of fatty acid synthesis	CDD, Gene3D, PRINTS, PRINTS, SUPERFAMILY, Pfam, PANTHER, PANTHER, Gene3D, SUPERFAMILY	cd05233, G3DSA:3.40.50.720, PR00081, PR00081, SSF51735, PF13561, PTHR42760:SF78, PTHR42760, G3DSA:3.40.50.720, SSF51735	SDR_c, Glucose/ribitol dehydrogenase family signature, Glucose/ribitol dehydrogenase family signature, Enoyl-(Acyl carrier protein) reductase	IPR002347, IPR002347, IPR036291, IPR036291	Short-chain dehydrogenase/reductase SDR, Short-chain dehydrogenase/reductase SDR, NAD(P)-binding domain superfamily, NAD(P)-binding domain superfamily
scaffold_17875_1	1448389.BAVQ01000088_gene1150	2.9e-37	160.6		1.13.11.25	ko:K16049	ko00984,ko01100,ko01120,ko01220,map00984,map01100,map01120,map01220		R04597	RC01610	ko00000,ko00001,ko01000				E	PFAM Glyoxalase bleomycin resistance protein dioxygenase	Gene3D, SUPERFAMILY, ProSitePatterns, Pfam, ProSiteProfiles	G3DSA:3.10.180.10, SSF54593, PS00082, PF00903, PS51819	Extradiol ring-cleavage dioxygenases signature, Glyoxalase/Bleomycin resistance protein/Dioxygenase superfamily, Vicinal oxygen chelate (VOC) domain profile.	IPR029068, IPR029068, IPR000486, IPR004360, IPR037523	Glyoxalase/Bleomycin resistance protein/Dihydroxybiphenyl dioxygenase, Glyoxalase/Bleomycin resistance protein/Dihydroxybiphenyl dioxygenase, Extradiol ring-cleavage dioxygenase, class I /II, Glyoxalase/fosfomycin resistance/dioxygenase domain, Vicinal oxygen chelate (VOC) domain	GO:0003824, GO:0006725, GO:0008198, GO:0055114
scaffold_17875_2	1448389.BAVQ01000088_gene1151	1.1e-60	239.2	kshA	1.14.13.142	ko:K15982	ko00984,ko01100,ko01120,map00984,map01100,map01120		R09860	RC02691	ko00000,ko00001,ko01000				P	Rieske 2Fe-2S	SUPERFAMILY, ProSiteProfiles, PANTHER, Gene3D, PANTHER, Pfam	SSF50022, PS51296, PTHR21266:SF32, G3DSA:2.102.10.10, PTHR21266, PF00355	Rieske [2Fe-2S] iron-sulfur domain profile, Rieske [2Fe-2S] domain	IPR036922, IPR017941, IPR036922, IPR017941	Rieske 2Fe-2S] iron-sulphur domain superfamily, Rieske 2Fe-2S] iron-sulphur domain, Rieske 2Fe-2S] iron-sulphur domain superfamily, Rieske 2Fe-2S] iron-sulphur domain	GO:0016491, GO:0051537, GO:0055114, GO:0016491, GO:0051537, GO:0055114, GO:0016491, GO:0051537, GO:0055114, GO:0016491, GO:0051537, GO:0055114
scaffold_18079_1	1448389.BAVQ01000025_gene1310	5.6e-78	297												IQ	Short-chain dehydrogenase reductase sdr	Gene3D, SUPERFAMILY, ProSitePatterns, CDD, Pfam, PRINTS, PRINTS, PRINTS, PRINTS, PANTHER	G3DSA:3.40.50.720, SSF51735, PS00061, cd05233, PF13561, PR00081, PR00081, PR00081, PR00081, PTHR43639	Short-chain dehydrogenases/reductases family signature, SDR_c, Enoyl-(Acyl carrier protein) reductase, Glucose/ribitol dehydrogenase family signature, Glucose/ribitol dehydrogenase family signature, Glucose/ribitol dehydrogenase family signature, Glucose/ribitol dehydrogenase family signature	IPR036291, IPR020904, IPR002347, IPR002347, IPR002347, IPR002347	NAD(P)-binding domain superfamily, Short-chain dehydrogenase/reductase, conserved site, Short-chain dehydrogenase/reductase SDR, Short-chain dehydrogenase/reductase SDR, Short-chain dehydrogenase/reductase SDR, Short-chain dehydrogenase/reductase SDR	GO:0016491
scaffold_18089_1	1449976.KALB_4957	5.9e-15	88.2			ko:K07451					ko00000,ko01000,ko02048				V	HNH endonuclease	NA	NA	NA	NA	NA	na	NA
scaffold_18840_1	1448389.BAVQ01000036_gene822	5.2e-126	457.2												IQ	Belongs to the short-chain dehydrogenases reductases (SDR) family	PRINTS, PRINTS, PRINTS, PANTHER, Pfam, Gene3D, SUPERFAMILY, PANTHER	PR00081, PR00081, PR00081, PTHR24320:SF124, PF00106, G3DSA:3.40.50.720, SSF51735, PTHR24320	Glucose/ribitol dehydrogenase family signature, Glucose/ribitol dehydrogenase family signature, Glucose/ribitol dehydrogenase family signature, short chain dehydrogenase	IPR002347, IPR002347, IPR002347, IPR002347, IPR036291	Short-chain dehydrogenase/reductase SDR, Short-chain dehydrogenase/reductase SDR, Short-chain dehydrogenase/reductase SDR, Short-chain dehydrogenase/reductase SDR, NAD(P)-binding domain superfamily
scaffold_18843_1	1089544.KB912942_gene2752	2.3e-65	255.8	cobT	3.4.17.14,6.6.1.2	ko:K07114,ko:K07260,ko:K09883	ko00550,ko00860,ko01100,ko01502,ko02020,map00550,map00860,map01100,map01502,map02020	M00651	R05227	RC02000	ko00000,ko00001,ko00002,ko01000,ko01002,ko01011,ko01504,ko02000	1.A.13.2.2,1.A.13.2.3			H	Cobalamin biosynthesis protein CobT VWA domain	Pfam, SUPERFAMILY	PF11775, SSF53300	Cobalamin biosynthesis protein CobT VWA domain	IPR025861, IPR036465	Cobalamin biosynthesis protein CobT VWA domain, von Willebrand factor A-like domain superfamily		KEGG: 00860+6.6.1.2, MetaCyc: PWY-7376,
scaffold_18955_1	1448389.BAVQ01000023_gene1407	6.9e-142	510		1.2.99.10	ko:K22445					ko00000,ko01000				C	Belongs to the aldehyde dehydrogenase family	PANTHER, SUPERFAMILY, Gene3D, Pfam, Gene3D, ProSitePatterns, PANTHER	PTHR11699:SF202, SSF53720, G3DSA:3.40.309.10, PF00171, G3DSA:3.40.605.10, PS00687, PTHR11699	Aldehyde dehydrogenase family, Aldehyde dehydrogenases glutamic acid active site.	IPR016161, IPR016163, IPR015590, IPR016162, IPR029510	Aldehyde/histidinol dehydrogenase, Aldehyde dehydrogenase, C-terminal, Aldehyde dehydrogenase domain, Aldehyde dehydrogenase, N-terminal, Aldehyde dehydrogenase, glutamic acid active site	GO:0016491, GO:0055114, GO:0016491, GO:0016620, GO:0055114, GO:0016491, GO:0055114, GO:0016491, GO:0055114, GO:0016491, GO:0055114
scaffold_19009_1	1448389.BAVQ01000030_gene673	6.9e-94	350.1												C	Nitroreductase	SUPERFAMILY, Pfam, CDD, PANTHER, Gene3D, PANTHER	SSF55469, PF00881, cd02136, PTHR23026:SF119, G3DSA:3.40.109.10, PTHR23026	Nitroreductase family, Nitroreductase	IPR000415, IPR029479, IPR000415	Nitroreductase-like, Nitroreductase, Nitroreductase-like	GO:0016491, GO:0016491	Reactome: R-HSA-209968, Reactome: R-HSA-209968, Reactome: R-HSA-209968,
scaffold_19009_2	1448389.BAVQ01000030_gene674	2.2e-14	84.3														TMHMM, TMHMM	TMhelix, TMhelix	Region of a membrane-bound protein predicted to be embedded in the membrane, Region of a membrane-bound protein predicted to be embedded in the membrane.
scaffold_19052_1	1448389.BAVQ01000036_gene908	6.8e-142	510	clpC		ko:K03696	ko01100,map01100				ko00000,ko03110				O	associated with various cellular activities	Coils, Gene3D, Gene3D, Pfam, SUPERFAMILY, ProSiteProfiles, Coils, CDD, SUPERFAMILY, PANTHER, Pfam, PRINTS, PRINTS, PANTHER	Coil, G3DSA:3.40.50.300, G3DSA:3.40.50.300, PF17871, SSF52540, PS50151, Coil, cd00009, SSF52540, PTHR43572:SF4, PF07724, PR00300, PR00300, PTHR43572	AAA lid domain, UVR domain profile, AAA, AAA domain (Cdc48 subfamily), ATP-dependent Clp protease ATP-binding subunit signature, ATP-dependent Clp protease ATP-binding subunit signature	IPR041546, IPR027417, IPR001943, IPR027417, IPR003959, IPR001270, IPR001270	ClpA/ClpB, AAA lid domain, P-loop containing nucleoside triphosphate hydrolase, UVR domain, P-loop containing nucleoside triphosphate hydrolase, ATPase, AAA-type, core, ClpA/B family, ClpA/B family	GO:0003674, GO:0003824, GO:0005488, GO:0005515, GO:0005575, GO:0005618, GO:0005622, GO:0005623, GO:0005737, GO:0005829, GO:0005886, GO:0006457, GO:0008150, GO:0009987, GO:0016020, GO:0016462, GO:0016787, GO:0016817, GO:0016818, GO:0016887, GO:0017111, GO:0030312, GO:0040007, GO:0042802, GO:0042803, GO:0044183, GO:0044424, GO:0044444, GO:0044464, GO:0046983, GO:0071944GO:0005515, GO:0005524, GO:00…
scaffold_195_19	285514.JNWO01000004_gene6424	5.4e-22	111.7														SUPERFAMILY, Pfam, TIGRFAM	SSF56563, PF05065, TIGR01554	Phage capsid family, major_cap_HK97: phage major capsid protein, HK97 family	IPR024455, IPR024455	Phage capsid, Phage capsid
scaffold_19631_1	1448389.BAVQ01000021_gene1690	2.5e-141	508.1												L	helicase	SUPERFAMILY, Gene3D, CDD, SUPERFAMILY, Pfam	SSF52540, G3DSA:3.40.50.300, cd17926, SSF52540, PF04851	DEXHc_RE, Type III restriction enzyme, res subunit	IPR027417, IPR027417, IPR006935	P-loop containing nucleoside triphosphate hydrolase, P-loop containing nucleoside triphosphate hydrolase, Helicase/UvrB, N-terminal	GO:0003677, GO:0005524, GO:0016787
scaffold_19981_1	1448389.BAVQ01000072_gene2636	2.3e-36	158.7												Q	methyltransferase	PANTHER, Pfam, Gene3D, PANTHER, CDD, SUPERFAMILY	PTHR43464, PF13649, G3DSA:3.40.50.150, PTHR43464:SF31, cd02440, SSF53335	Methyltransferase domain, AdoMet_MTases	IPR041698, IPR029063	Methyltransferase domain 25, S-adenosyl-L-methionine-dependent methyltransferase
scaffold_20091_1	1101188.KI912155_gene3058	1e-42	179.9												I	Gluconate 2-dehydrogenase subunit 3	Pfam	PF13618	Gluconate 2-dehydrogenase subunit 3	IPR027056	Gluconate 2-dehydrogenase subunit 3		KEGG: 00030+1.1.99.3, MetaCyc: PWY-7165
scaffold_20346_1	44060.JODL01000016_gene4261	5.4e-80	304.3												EF	Pfam Carbamoyl-phosphate synthase L chain, ATP binding domain	PANTHER, SUPERFAMILY, Pfam, PANTHER, Gene3D, ProSiteProfiles	PTHR43585, SSF56059, PF02786, PTHR43585:SF2, G3DSA:3.30.470.20, PS50975	Carbamoyl-phosphate synthase L chain, ATP binding domain, ATP-grasp fold profile.	IPR005479, IPR011761	Carbamoyl-phosphate synthetase large subunit-like, ATP-binding domain, ATP-grasp fold	GO:0005524, GO:0005524, GO:0046872
scaffold_20384_1	1448389.BAVQ01000009_gene3811	5.7e-114	417.2	yhbH		ko:K09786					ko00000				S	Iron-containing redox enzyme	SUPERFAMILY, Pfam, Gene3D, SMART	SSF48613, PF14518, G3DSA:1.20.910.10, SM01236	Iron-containing redox enzyme	IPR016084, IPR016084	Haem oxygenase-like, multi-helical, Haem oxygenase-like, multi-helical		Reactome: R-HSA-189483, Reactome: R-HSA-917937, Reactome: R-HSA-189483, Reactome: R-HSA-917937,
scaffold_20497_2	1095772.CAHH01000064_gene678	2.3e-07	61.6		3.1.11.3	ko:K01143					ko00000,ko01000				L	YqaJ-like viral recombinase domain	Gene3D, SUPERFAMILY	G3DSA:3.90.320.10, SSF52980		IPR011604, IPR011335	Exonuclease, phage-type/RecB, C-terminal, Restriction endonuclease type II-like		Reactome: R-HSA-6783310
scaffold_20701_1	1448389.BAVQ01000071_gene2478	2.3e-123	448.4	msbA9		ko:K06147,ko:K06148					ko00000,ko02000	3.A.1,3.A.1.106,3.A.1.109,3.A.1.21			V	ABC transporter	PANTHER, SMART, ProSitePatterns, PANTHER, Pfam, ProSiteProfiles, SUPERFAMILY, Gene3D	PTHR24221:SF461, SM00382, PS00211, PTHR24221, PF00005, PS50893, SSF52540, G3DSA:3.40.50.300	ABC transporters family signature, ABC transporter, ATP-binding cassette, ABC transporter-type domain profile.	IPR003593, IPR017871, IPR039421, IPR003439, IPR003439, IPR027417	AAA+ ATPase domain, ABC transporter, conserved site, Type I protein exporter, ABC transporter-like, ABC transporter-like, P-loop containing nucleoside triphosphate hydrolase	GO:0005524, GO:0016887, GO:0005524, GO:0016887, GO:0005524, GO:0016887
scaffold_20860_1	1448389.BAVQ01000005_gene3060	1.6e-98	365.5	upp	2.4.2.9	ko:K00761	ko00240,ko01100,map00240,map01100		R00966	RC00063	ko00000,ko00001,ko01000				F	Catalyzes the conversion of uracil and 5-phospho-alpha- D-ribose 1-diphosphate (PRPP) to UMP and diphosphate	CDD, Hamap, Pfam, SUPERFAMILY, Gene3D, PANTHER, PANTHER, TIGRFAM	cd06223, MF_01218_B, PF14681, SSF53271, G3DSA:3.40.50.2020, PTHR10285, PTHR10285:SF135, TIGR01091	PRTases_typeI, Uracil phosphoribosyltransferase [upp], Uracil phosphoribosyltransferase, upp: uracil phosphoribosyltransferase	IPR000836, IPR034332, IPR029057, IPR005765	Phosphoribosyltransferase domain, Uracil phosphoribosyltransferase, bacterial-type, Phosphoribosyltransferase-like, Uracil phosphoribosyl transferase	GO:0003674, GO:0003824, GO:0004849, GO:0005575, GO:0005622, GO:0005623, GO:0005737, GO:0005829, GO:0006139, GO:0006206, GO:0006213, GO:0006220, GO:0006221, GO:0006222, GO:0006725, GO:0006753, GO:0006793, GO:0006796, GO:0006807, GO:0008150, GO:0008152, GO:0008655, GO:0009058, GO:0009112, GO:0009116, GO:0009117, GO:0009119, GO:0009123, GO:0009124, GO:0009129, GO:0009130, GO:0009156, GO:0009161, GO:…	KEGG: 00240+2.4.2.9, MetaCyc: PWY-7183, KEGG: 00240+2.4.2.9, MetaCyc: PWY-7183
scaffold_21097_1	494419.ALPM01000004_gene1775	8.3e-22	110.5			ko:K03497					ko00000,ko03000,ko03036,ko04812				K	ParB domain protein nuclease	SUPERFAMILY, SMART, PANTHER, Gene3D, Pfam, Gene3D, CDD	SSF110849, SM00470, PTHR33375, G3DSA:1.10.10.2830, PF02195, G3DSA:3.90.1530.30, cd16387	ParB-like nuclease domain, ParB_N_Srx	IPR036086, IPR003115, IPR003115	ParB/Sulfiredoxin superfamily, ParB/Sulfiredoxin, ParB/Sulfiredoxin
scaffold_21190_1	1448389.BAVQ01000015_gene4135	1.5e-31	143.3														Coils, MobiDBLite, Coils, MobiDBLite, Coils	Coil, mobidb-lite, Coil, mobidb-lite, Coil	consensus disorder prediction, consensus disorder prediction
scaffold_21351_1	1448389.BAVQ01000002_gene2989	1.3e-123	449.1	trxB	1.8.1.9,4.3.1.9	ko:K00384,ko:K22345	ko00030,ko00450,map00030,map00450		R01544,R02016,R03596,R09372	RC00013,RC00544,RC02518,RC02873	ko00000,ko00001,ko01000			iPC815.YPO1374	C	Belongs to the class-II pyridine nucleotide-disulfide oxidoreductase family	PRINTS, PRINTS, PRINTS, PRINTS, PANTHER, PRINTS, PRINTS, PRINTS, PRINTS, PRINTS, PRINTS, PRINTS, PRINTS, SUPERFAMILY, Pfam, ProSitePatterns, Gene3D, TMHMM, Gene3D	PR00368, PR00368, PR00368, PR00368, PTHR42863, PR00469, PR00469, PR00469, PR00469, PR00469, PR00469, PR00469, PR00469, SSF51905, PF07992, PS00573, G3DSA:3.50.50.60, TMhelix, G3DSA:3.50.50.60	FAD-dependent pyridine nucleotide reductase signature, FAD-dependent pyridine nucleotide reductase signature, FAD-dependent pyridine nucleotide reductase signature, FAD-dependent pyridine nucleotide reductase signature, Pyridine nucleotide disulphide reductase class-II signature, Pyridine nucleotide disulphide reductase class-II signature, Pyridine nucleotide disulphide reductase class-II signatu…	IPR036188, IPR023753, IPR008255, IPR036188, IPR036188	FAD/NAD(P)-binding domain superfamily, FAD/NAD(P)-binding domain, Pyridine nucleotide-disulphide oxidoreductase, class-II, active site, FAD/NAD(P)-binding domain superfamily, FAD/NAD(P)-binding domain superfamily	GO:0000166, GO:0003674, GO:0003824, GO:0004791, GO:0005488, GO:0005575, GO:0005622, GO:0005623, GO:0005737, GO:0005829, GO:0008150, GO:0008152, GO:0009636, GO:0009987, GO:0015036, GO:0016209, GO:0016491, GO:0016651, GO:0016667, GO:0016668, GO:0036094, GO:0042221, GO:0043167, GO:0043168, GO:0044424, GO:0044444, GO:0044464, GO:0048037, GO:0050660, GO:0050662, GO:0050896, GO:0051716, GO:0055114, GO:…
scaffold_21436_1	1246445.ANAY01000006_gene3628	2.7e-113	414.8												J	tRNA cytidylyltransferase activity	Pfam, SUPERFAMILY, CDD	PF18144, SSF81301, cd05400	Second Messenger Oligonucleotide or Dinucleotide Synthetase domain, NT_2-5OAS_ClassI-CCAase
scaffold_21567_1	1448389.BAVQ01000003_gene3474	1.7e-116	425.2	aroG	2.5.1.54	ko:K01626	ko00400,ko01100,ko01110,ko01130,ko01230,ko02024,map00400,map01100,map01110,map01130,map01230,map02024	M00022	R01826	RC00435	ko00000,ko00001,ko00002,ko01000			iNJ661.Rv2178c	E	Belongs to the class-II DAHP synthase family	Pfam, SUPERFAMILY, PANTHER, PANTHER, Gene3D	PF01474, SSF51569, PTHR21337:SF0, PTHR21337, G3DSA:3.20.20.70	Class-II DAHP synthetase family	IPR002480, IPR002480, IPR013785	DAHP synthetase, class II, DAHP synthetase, class II, Aldolase-type TIM barrel	GO:0003674, GO:0003824, GO:0003849, GO:0005488, GO:0005575, GO:0005618, GO:0005622, GO:0005623, GO:0005737, GO:0005829, GO:0005886, GO:0006082, GO:0008150, GO:0008152, GO:0009058, GO:0009423, GO:0009987, GO:0016020, GO:0016043, GO:0016053, GO:0016740, GO:0016765, GO:0019752, GO:0022607, GO:0030145, GO:0030312, GO:0040007, GO:0043167, GO:0043169, GO:0043436, GO:0043648, GO:0043650, GO:0043933, GO:…	KEGG: 00400+2.5.1.54, MetaCyc: PWY-6164, KEGG: 00400+2.5.1.54, MetaCyc: PWY-6164,
scaffold_21675_1	1292020.H483_0103110	1.1e-141	509.2												G	Domain of unknown function (DUF4185)	Pfam	PF13810	Domain of unknown function (DUF4185)	IPR025442	Domain of unknown function DUF4185
scaffold_21703_1	1448389.BAVQ01000070_gene2227	2.9e-20	103.6	cmpC	3.6.3.25	ko:K02045,ko:K02049,ko:K15555	ko00920,ko02010,map00920,map02010	M00185,M00188,M00436			ko00000,ko00001,ko00002,ko01000,ko02000	3.A.1.16,3.A.1.17,3.A.1.17.2,3.A.1.6.1,3.A.1.6.3			P	ATPases associated with a variety of cellular activities	PANTHER, SUPERFAMILY, Gene3D, Pfam	PTHR42788, SSF52540, G3DSA:3.40.50.300, PF00005	ABC transporter	IPR027417, IPR003439	P-loop containing nucleoside triphosphate hydrolase, ABC transporter-like	GO:0005524, GO:0016887
scaffold_21703_2	1448389.BAVQ01000070_gene2226	4.4e-77	294.3												I	acyl-CoA dehydrogenase activity	PANTHER, SUPERFAMILY, SUPERFAMILY, Coils, Gene3D, PANTHER, Gene3D	PTHR43835, SSF56645, SSF47203, Coil, G3DSA:2.40.110.10, PTHR43835:SF17, G3DSA:1.20.140.10		IPR009100, IPR036250	Acyl-CoA dehydrogenase/oxidase, N-terminal and middle domain superfamily, Acyl-CoA dehydrogenase-like, C-terminal	GO:0016627, GO:0055114, GO:0016627, GO:0055114
scaffold_21771_1	1448389.BAVQ01000002_gene2916	4.5e-92	344.4												S	protein conserved in bacteria	Pfam, TMHMM, PANTHER, Gene3D, PANTHER	PF05949, TMhelix, PTHR37313, G3DSA:3.30.70.1880, PTHR37313:SF4	Bacterial protein of unknown function (DUF881), Region of a membrane-bound protein predicted to be embedded in the membrane.	IPR010273, IPR010273	Protein of unknown function DUF881, Protein of unknown function DUF881
scaffold_21845_2	1095772.CAHH01000006_gene2244	2.1e-59	235	rpsH		ko:K02994	ko03010,map03010	M00178,M00179			br01610,ko00000,ko00001,ko00002,ko03011				J	One of the primary rRNA binding proteins, it binds directly to 16S rRNA central domain where it helps coordinate assembly of the platform of the 30S subunit	PANTHER, PANTHER, Gene3D, Pfam, SUPERFAMILY, ProSitePatterns, Gene3D, Hamap	PTHR11758:SF29, PTHR11758, G3DSA:3.30.1490.10, PF00410, SSF56047, PS00053, G3DSA:3.30.1370.30, MF_01302_B	Ribosomal protein S8, Ribosomal protein S8 signature, 30S ribosomal protein S8 [rpsH].	IPR000630, IPR000630, IPR035987, IPR000630, IPR000630	Ribosomal protein S8, Ribosomal protein S8, Ribosomal protein S8 superfamily, Ribosomal protein S8, Ribosomal protein S8	GO:0003674, GO:0003735, GO:0005198, GO:0005575, GO:0005622, GO:0005623, GO:0005737, GO:0005829, GO:0005840, GO:0008150, GO:0015935, GO:0022626, GO:0022627, GO:0032991, GO:0040007, GO:0043226, GO:0043228, GO:0043229, GO:0043232, GO:0044391, GO:0044422, GO:0044424, GO:0044444, GO:0044445, GO:0044446, GO:0044464, GO:1990904GO:0003735, GO:0005840, GO:0006412, GO:0003735, GO:0005840, GO:0006412, GO:00…	Reactome: R-HSA-156827, Reactome: R-HSA-156902, Reactome: R-HSA-1799339, Reactome: R-HSA-192823, Reactome: R-HSA-2408557, Reactome: R-HSA-6791226, Reactome: R-HSA-72649, Reactome: R-HSA-72689, Reactome: R-HSA-72695, Reactome: R-HSA-72702, Reactome: R-HSA-72706, Reactome: R-HSA-72764, Reactome: R-HSA-9010553, Reactome: R-HSA-975956, Reactome: R-HSA-975957, Reactome: R-HSA-156827, Reactome: R-HSA-1…
scaffold_21867_2	1292020.H483_0110475	1.1e-50	206.5														SUPERFAMILY	SSF54060
scaffold_22016_1	2002.JOEQ01000079_gene1528	2.8e-43	181.8												L	Belongs to the phage integrase family	SUPERFAMILY, Gene3D	SSF56349, G3DSA:1.10.150.130		IPR011010, IPR010998	DNA breaking-rejoining enzyme, catalytic core, Integrase/recombinase, N-terminal	GO:0003677
scaffold_22095_1	1448389.BAVQ01000080_gene473	2.1e-29	134.4	mltG		ko:K07082					ko00000				S	Functions as a peptidoglycan terminase that cleaves nascent peptidoglycan strands endolytically to terminate their elongation	PANTHER, Pfam	PTHR30518, PF02618	YceG-like family	IPR003770, IPR003770	Endolytic murein transglycosylase, Endolytic murein transglycosylase
scaffold_22095_2	1448389.BAVQ01000080_gene472	4.7e-66	257.3	aroE	1.1.1.25	ko:K00014	ko00400,ko01100,ko01110,ko01130,ko01230,map00400,map01100,map01110,map01130,map01230	M00022	R02413	RC00206	ko00000,ko00001,ko00002,ko01000			iNJ661.Rv2552c	E	Shikimate dehydrogenase	Gene3D, PANTHER, Pfam, PANTHER, SUPERFAMILY, Gene3D, SUPERFAMILY	G3DSA:3.40.50.10860, PTHR21089, PF08501, PTHR21089:SF1, SSF51735, G3DSA:3.40.50.720, SSF53223	Shikimate dehydrogenase substrate binding domain	IPR013708, IPR036291	Shikimate dehydrogenase substrate binding, N-terminal, NAD(P)-binding domain superfamily	GO:0000166, GO:0003674, GO:0003824, GO:0004764, GO:0005488, GO:0005575, GO:0005622, GO:0005623, GO:0005737, GO:0005829, GO:0006082, GO:0008150, GO:0008152, GO:0009058, GO:0009423, GO:0009987, GO:0016053, GO:0016491, GO:0016614, GO:0016616, GO:0019632, GO:0019752, GO:0032787, GO:0036094, GO:0043436, GO:0043648, GO:0043650, GO:0044237, GO:0044249, GO:0044281, GO:0044283, GO:0044424, GO:0044444, GO:…	KEGG: 00400+1.1.1.25, MetaCyc: PWY-6163,
scaffold_22164_1	1448389.BAVQ01000036_gene847	1.3e-33	148.7	ssgB											E	HAD-superfamily subfamily IB hydrolase, TIGR01490	Gene3D, PANTHER, Gene3D, PANTHER	G3DSA:1.20.1440.100, PTHR43344, G3DSA:3.40.50.1000, PTHR43344:SF4		IPR023214	HAD superfamily	GO:0005575, GO:0005622, GO:0005623, GO:0005737, GO:0005829, GO:0044424, GO:0044444, GO:0044464
scaffold_22261_1	1448389.BAVQ01000071_gene2405	9.3e-100	369.8	pat	2.6.1.9	ko:K00817	ko00340,ko00350,ko00360,ko00400,ko00401,ko00960,ko01100,ko01110,ko01130,ko01230,map00340,map00350,map00360,map00400,map00401,map00960,map01100,map01110,map01130,map01230	M00026	R00694,R00734,R03243	RC00006,RC00888	ko00000,ko00001,ko00002,ko01000,ko01007				E	May catalyze the transamination reaction in phenylalanine biosynthesis	CDD, ProSitePatterns, PANTHER, SUPERFAMILY, Pfam, PANTHER, Gene3D, Gene3D	cd00609, PS00599, PTHR43643:SF3, SSF53383, PF00155, PTHR43643, G3DSA:3.90.1150.10, G3DSA:3.40.640.10	AAT_like, Aminotransferases class-II pyridoxal-phosphate attachment site, Aminotransferase class I and II	IPR001917, IPR015424, IPR004839, IPR015422, IPR015421	Aminotransferase, class-II, pyridoxal-phosphate binding site, Pyridoxal phosphate-dependent transferase, Aminotransferase, class I/classII, Pyridoxal phosphate-dependent transferase domain 1, Pyridoxal phosphate-dependent transferase, major domain	GO:0016740, GO:0009058, GO:0030170, GO:0003824, GO:0003824
scaffold_22358_1	1095772.CAHH01000063_gene655	9e-08	63.5														NA	NA	NA	NA	NA	na	NA
scaffold_22399_1	1449976.KALB_4957	1.6e-15	89.7			ko:K07451					ko00000,ko01000,ko02048				V	HNH endonuclease	Gene3D, Pfam, CDD, SMART	G3DSA:3.30.40.60, PF01844, cd00085, SM00507	HNH endonuclease, HNHc	IPR002711, IPR003615, IPR003615	HNH endonuclease, HNH nuclease, HNH nuclease	GO:0003676, GO:0004519
scaffold_22677_1	1463881.KL591002_gene4534	2.4e-60	238.4												J	Acetyltransferase (GNAT) domain	PANTHER, Pfam, SUPERFAMILY, Gene3D, PANTHER, ProSiteProfiles	PTHR43441, PF13302, SSF55729, G3DSA:3.40.630.30, PTHR43441:SF6, PS51186	Acetyltransferase (GNAT) domain, Gcn5-related N-acetyltransferase (GNAT) domain profile.	IPR000182, IPR016181, IPR000182	GNAT domain, Acyl-CoA N-acyltransferase, GNAT domain	GO:0008080, GO:0008080
scaffold_22755_1	1448389.BAVQ01000023_gene1390	1e-35	156.8														MobiDBLite, MobiDBLite, Coils, MobiDBLite, MobiDBLite, Coils	mobidb-lite, mobidb-lite, Coil, mobidb-lite, mobidb-lite, Coil	consensus disorder prediction, consensus disorder prediction, consensus disorder prediction, consensus disorder prediction
scaffold_22794_1	68570.DC74_4918	1.3e-51	209.9												L	Belongs to the helicase family. UvrD subfamily	NA	NA	NA	NA	NA	na	NA
scaffold_22846_1	1448389.BAVQ01000023_gene1569	4.1e-44	183.7	serC	2.6.1.52	ko:K00831	ko00260,ko00680,ko00750,ko01100,ko01120,ko01130,ko01200,ko01230,map00260,map00680,map00750,map01100,map01120,map01130,map01200,map01230	M00020,M00124	R04173,R05085	RC00006,RC00036	ko00000,ko00001,ko00002,ko01000,ko01007				E	Catalyzes the reversible conversion of 3- phosphohydroxypyruvate to phosphoserine and of 3-hydroxy-2-oxo-4- phosphonooxybutanoate to phosphohydroxythreonine	Gene3D, SUPERFAMILY	G3DSA:3.90.1150.10, SSF53383		IPR015422, IPR015424	Pyridoxal phosphate-dependent transferase domain 1, Pyridoxal phosphate-dependent transferase	GO:0001505, GO:0003674, GO:0003824, GO:0004760, GO:0005575, GO:0005576, GO:0005622, GO:0005623, GO:0005737, GO:0005777, GO:0005886, GO:0006082, GO:0006520, GO:0006544, GO:0006545, GO:0006807, GO:0008150, GO:0008152, GO:0008453, GO:0008483, GO:0008652, GO:0009058, GO:0009069, GO:0009070, GO:0009987, GO:0016020, GO:0016053, GO:0016740, GO:0016769, GO:0017144, GO:0019265, GO:0019752, GO:0040007, GO:…
scaffold_22846_2	1448389.BAVQ01000023_gene1570	1e-23	115.5												S	DNA-binding protein	Pfam	PF11268	Protein of unknown function (DUF3071)	IPR021421	Protein of unknown function DUF3071	GO:0008150, GO:0040007
scaffold_23006_1	1121362.A605_05485	7.7e-65	253.8	hldE	2.7.1.167,2.7.7.70	ko:K03272	ko00540,ko01100,map00540,map01100	M00064	R05644,R05646	RC00002,RC00078	ko00000,ko00001,ko00002,ko01000,ko01005				IM	Catalyzes the ADP transfer from ATP to D-glycero-beta-D- manno-heptose 1-phosphate, yielding ADP-D-glycero-beta-D-manno- heptose	ProSitePatterns, Pfam, Gene3D, PANTHER, SUPERFAMILY	PS00583, PF00294, G3DSA:3.40.1190.20, PTHR46969, SSF53613	pfkB family of carbohydrate kinases signature 1, pfkB family carbohydrate kinase	IPR002173, IPR011611, IPR029056, IPR029056	Carbohydrate/puine kinase, PfkB, conserved site, Carbohydrate kinase PfkB, Ribokinase-like, Ribokinase-like	GO:0016773
scaffold_23369_2	1151118.KB895790_gene1116	3.2e-13	81.3												E	flavin adenine dinucleotide binding	MobiDBLite, Gene3D	mobidb-lite, G3DSA:3.40.50.12500	consensus disorder prediction
scaffold_23379_2	1448389.BAVQ01000003_gene3649	4.9e-57	227.6	folC	6.3.2.12,6.3.2.17	ko:K11754	ko00790,ko01100,map00790,map01100	M00126,M00841	R00942,R02237,R04241	RC00064,RC00090,RC00162	ko00000,ko00001,ko00002,ko01000			iNJ661.Rv2447c	H	Folylpolyglutamate synthase	SUPERFAMILY, Gene3D, PANTHER, MobiDBLite, PANTHER	SSF53623, G3DSA:3.40.1190.10, PTHR11136, mobidb-lite, PTHR11136:SF0	consensus disorder prediction	IPR036565, IPR036565, IPR001645	Mur-like, catalytic domain superfamily, Mur-like, catalytic domain superfamily, Folylpolyglutamate synthetase	GO:0003674, GO:0003824, GO:0004326, GO:0005575, GO:0005622, GO:0005623, GO:0005737, GO:0006082, GO:0006575, GO:0006725, GO:0006732, GO:0006760, GO:0006761, GO:0006807, GO:0008150, GO:0008152, GO:0008841, GO:0009058, GO:0009108, GO:0009396, GO:0009987, GO:0016053, GO:0016874, GO:0016879, GO:0016881, GO:0018130, GO:0019438, GO:0019752, GO:0034641, GO:0042398, GO:0042558, GO:0042559, GO:0043436, GO:…	Reactome: R-HSA-196757, Reactome: R-HSA-196757, KEGG: 00790+6.3.2.17, MetaCyc: PWY-2161, Reactome: R-HSA-196757,
scaffold_23384_1	883077.HMPREF9241_00001	1.7e-08	65.1														NA	NA	NA	NA	NA	na	NA
scaffold_23703_1	591157.SSLG_00003	4.5e-09	68.6														NA	NA	NA	NA	NA	na	NA
scaffold_23926_1	1448389.BAVQ01000072_gene2715	1.4e-47	195.3	rplW		ko:K02892	ko03010,map03010	M00178,M00179			br01610,ko00000,ko00001,ko00002,ko03011				J	One of the early assembly proteins it binds 23S rRNA. One of the proteins that surrounds the polypeptide exit tunnel on the outside of the ribosome. Forms the main docking site for trigger factor binding to the ribosome	Hamap, PANTHER, PANTHER, ProSitePatterns, SUPERFAMILY, Pfam, Gene3D	MF_01369_B, PTHR11620, PTHR11620:SF2, PS00050, SSF54189, PF00276, G3DSA:3.30.70.330	50S ribosomal protein L23 [rplW], Ribosomal protein L23 signature, Ribosomal protein L23	IPR013025, IPR001014, IPR012678, IPR013025, IPR012677	Ribosomal protein L25/L23, Ribosomal protein L23/L25, conserved site, Ribosomal protein L23/L15e core domain superfamily, Ribosomal protein L25/L23, Nucleotide-binding alpha-beta plait domain superfamily	GO:0000027, GO:0003674, GO:0003676, GO:0003723, GO:0003735, GO:0005198, GO:0005488, GO:0005575, GO:0005622, GO:0005623, GO:0005737, GO:0005829, GO:0005840, GO:0005886, GO:0006412, GO:0006518, GO:0006807, GO:0006996, GO:0008150, GO:0008152, GO:0009058, GO:0009059, GO:0009987, GO:0010467, GO:0015934, GO:0016020, GO:0016043, GO:0019538, GO:0022607, GO:0022613, GO:0022618, GO:0022625, GO:0022626, GO:…	Reactome: R-HSA-156827, Reactome: R-HSA-156902, Reactome: R-HSA-1799339, Reactome: R-HSA-192823, Reactome: R-HSA-2408557, Reactome: R-HSA-6791226, Reactome: R-HSA-72689, Reactome: R-HSA-72706, Reactome: R-HSA-72764, Reactome: R-HSA-9010553, Reactome: R-HSA-975956, Reactome: R-HSA-975957,
scaffold_23926_2	1448389.BAVQ01000072_gene2716	6.5e-50	203	rplB		ko:K02886	ko03010,map03010	M00178,M00179			br01610,ko00000,ko00001,ko00002,ko03011				J	One of the primary rRNA binding proteins. Required for association of the 30S and 50S subunits to form the 70S ribosome, for tRNA binding and peptide bond formation. It has been suggested to have peptidyltransferase activity	MobiDBLite, SMART, Pfam, Gene3D, PANTHER, PANTHER, MobiDBLite, SUPERFAMILY	mobidb-lite, SM01383, PF00181, G3DSA:2.40.50.140, PTHR13691:SF5, PTHR13691, mobidb-lite, SSF50249	consensus disorder prediction, Ribosomal Proteins L2, RNA binding domain, consensus disorder prediction	IPR002171, IPR022666, IPR002171, IPR012340	Ribosomal protein L2, Ribosomal Proteins L2, RNA binding domain, Ribosomal protein L2, Nucleic acid-binding, OB-fold	GO:0000027, GO:0002181, GO:0003674, GO:0003676, GO:0003723, GO:0003735, GO:0005198, GO:0005488, GO:0005575, GO:0005622, GO:0005623, GO:0005737, GO:0005829, GO:0005840, GO:0005886, GO:0006412, GO:0006518, GO:0006807, GO:0006996, GO:0008150, GO:0008152, GO:0008270, GO:0009058, GO:0009059, GO:0009987, GO:0010467, GO:0015934, GO:0016020, GO:0016043, GO:0019538, GO:0022607, GO:0022613, GO:0022618, GO:…
scaffold_24223_1	1448389.BAVQ01000013_gene4005	1.9e-39	168.7	chiS											T	Histidine kinase	CDD, PANTHER, SUPERFAMILY, Gene3D, MobiDBLite, PANTHER	cd16917, PTHR24421, SSF55874, G3DSA:3.30.565.10, mobidb-lite, PTHR24421:SF10	HATPase_UhpB-NarQ-NarX-like, consensus disorder prediction	IPR036890, IPR036890	Histidine kinase/HSP90-like ATPase superfamily, Histidine kinase/HSP90-like ATPase superfamily
scaffold_24223_2	1448389.BAVQ01000013_gene4004	1.7e-28	131.7	chiR											T	response regulator	CDD, SUPERFAMILY, Gene3D, PANTHER, ProSiteProfiles, PANTHER, Pfam	cd00156, SSF52172, G3DSA:3.40.50.12740, PTHR43214:SF29, PS50110, PTHR43214, PF00072	REC, Response regulatory domain profile, Response regulator receiver domain	IPR001789, IPR011006, IPR001789, IPR001789	Signal transduction response regulator, receiver domain, CheY-like superfamily, Signal transduction response regulator, receiver domain, Signal transduction response regulator, receiver domain	GO:0000160, GO:0000160, GO:0000160
scaffold_24251_2	1448389.BAVQ01000083_gene238	6.1e-17	93.2														MobiDBLite	mobidb-lite	consensus disorder prediction
scaffold_24258_1	266117.Rxyl_1933	1.8e-10	73.2												S	Sulfotransferase family	TMHMM, Gene3D, Pfam, SUPERFAMILY	TMhelix, G3DSA:3.40.50.300, PF00685, SSF52540	Region of a membrane-bound protein predicted to be embedded in the membrane, Sulfotransferase domain	IPR000863, IPR027417	Sulfotransferase domain, P-loop containing nucleoside triphosphate hydrolase	GO:0008146
scaffold_24538_1	754252.PFREUD_09040	4e-48	197.6	pduE	4.2.1.28,4.2.1.30	ko:K06122,ko:K13920	ko00561,ko00640,map00561,map00640		R01047,R02376	RC00429,RC00707	ko00000,ko00001,ko01000				Q	Dehydratase small subunit	PIRSF, SUPERFAMILY, Gene3D, Pfam	PIRSF018505, SSF47148, G3DSA:1.10.1510.20, PF02287	Dehydratase small subunit	IPR003207, IPR036091, IPR036091, IPR003207	Propanediol/glycerol dehydratase, small subunit, Propanediol/glycerol dehydratase, small subunit superfamily, Propanediol/glycerol dehydratase, small subunit superfamily, Propanediol/glycerol dehydratase, small subunit		KEGG: 00640+4.2.1.28, MetaCyc: PWY-7013, KEGG: 00640+4.2.1.28, MetaCyc: PWY-7013, KEGG: 00640+4.2.1.28, MetaCyc: PWY-7013, KEGG: 00640+4.2.1.28, MetaCyc: PWY-7013
scaffold_24583_1	1448389.BAVQ01000072_gene2699	2.5e-105	388.3			ko:K00666					ko00000,ko01000,ko01004				IQ	PFAM AMP-dependent synthetase and ligase	PANTHER, PANTHER, CDD, SUPERFAMILY, TMHMM, Pfam, Gene3D	PTHR43767:SF1, PTHR43767, cd17631, SSF56801, TMhelix, PF00501, G3DSA:3.40.50.12780	FACL_FadD13-like, Region of a membrane-bound protein predicted to be embedded in the membrane, AMP-binding enzyme	IPR000873, IPR042099	AMP-dependent synthetase/ligase, AMP-dependent synthetase-like superfamily	GO:0003824
scaffold_24586_1	1448389.BAVQ01000036_gene891	3.4e-110	404.4	ftsH		ko:K03798		M00742			ko00000,ko00002,ko01000,ko01002,ko03110				O	Acts as a processive, ATP-dependent zinc metallopeptidase for both cytoplasmic and membrane proteins. Plays a role in the quality control of integral membrane proteins	SUPERFAMILY, Pfam, CDD, SMART, Gene3D, TMHMM, PANTHER, PANTHER	SSF52540, PF00004, cd00009, SM00382, G3DSA:3.40.50.300, TMhelix, PTHR23076:SF97, PTHR23076	ATPase family associated with various cellular activities (AAA), AAA, Region of a membrane-bound protein predicted to be embedded in the membrane.	IPR027417, IPR003959, IPR003593	P-loop containing nucleoside triphosphate hydrolase, ATPase, AAA-type, core, AAA+ ATPase domain	GO:0000166, GO:0003674, GO:0003824, GO:0004175, GO:0004176, GO:0004222, GO:0005488, GO:0005515, GO:0005524, GO:0005575, GO:0005622, GO:0005623, GO:0005737, GO:0005829, GO:0005886, GO:0005887, GO:0006508, GO:0006807, GO:0006950, GO:0006979, GO:0008144, GO:0008150, GO:0008152, GO:0008233, GO:0008237, GO:0008270, GO:0009056, GO:0009057, GO:0010468, GO:0016020, GO:0016021, GO:0016462, GO:0016787, GO:…
scaffold_24636_2	1448389.BAVQ01000072_gene2636	2.3e-54	218.4												Q	methyltransferase	Gene3D, SUPERFAMILY	G3DSA:3.40.50.150, SSF53335		IPR029063	S-adenosyl-L-methionine-dependent methyltransferase
scaffold_24665_1	1448389.BAVQ01000043_gene1847	4.6e-80	304.3	lon		ko:K07177	ko02024,map02024				ko00000,ko00001,ko01002				T	Belongs to the peptidase S16 family	Gene3D, ProSiteProfiles, PANTHER, SUPERFAMILY, CDD, Pfam, Pfam, Gene3D, SUPERFAMILY, PANTHER	G3DSA:3.30.230.10, PS51786, PTHR10046:SF48, SSF54211, cd00987, PF13180, PF05362, G3DSA:2.30.42.10, SSF50156, PTHR10046	Lon proteolytic domain profile, PDZ_serine_protease, PDZ domain, Lon protease (S16) C-terminal proteolytic domain	IPR014721, IPR008269, IPR020568, IPR001478, IPR008269, IPR036034, IPR027065	Ribosomal protein S5 domain 2-type fold, subgroup, Peptidase S16, Lon proteolytic domain, Ribosomal protein S5 domain 2-type fold, PDZ domain, Peptidase S16, Lon proteolytic domain, PDZ superfamily, Lon protease	GO:0004176, GO:0004252, GO:0006508, GO:0005515, GO:0004176, GO:0004252, GO:0006508, GO:0005515, GO:0004176, GO:0004252, GO:0005524, GO:0030163
scaffold_24796_1	1448389.BAVQ01000084_gene79	2.2e-101	375.2	ppgK	2.7.1.2,2.7.1.63	ko:K00845,ko:K00886	ko00010,ko00052,ko00500,ko00520,ko00521,ko00524,ko01100,ko01110,ko01120,ko01130,ko01200,map00010,map00052,map00500,map00520,map00521,map00524,map01100,map01110,map01120,map01130,map01200	M00001,M00549	R00299,R01600,R01786,R02187,R02189	RC00002,RC00017	ko00000,ko00001,ko00002,ko01000				GK	polyphosphate glucokinase	Gene3D, Pfam, PANTHER, SUPERFAMILY, Gene3D, PANTHER	G3DSA:3.30.420.40, PF00480, PTHR18964, SSF53067, G3DSA:3.30.420.40, PTHR18964:SF146	ROK family	IPR000600, IPR000600	ROK family, ROK family	GO:0003674, GO:0003824, GO:0004340, GO:0004396, GO:0005975, GO:0006793, GO:0006796, GO:0008150, GO:0008152, GO:0009987, GO:0016301, GO:0016310, GO:0016740, GO:0016772, GO:0016773, GO:0019200, GO:0019637, GO:0040007, GO:0044237, GO:0044238, GO:0044262, GO:0046835, GO:0047330, GO:0051156, GO:0071704, GO:1901135	Reactome: R-HSA-4085001, Reactome: R-HSA-4085011, Reactome: R-HSA-4085001, Reactome: R-HSA-4085011,
scaffold_24901_1	1448389.BAVQ01000090_gene2076	3.4e-74	284.6												V	Beta-lactamase	Gene3D, SUPERFAMILY	G3DSA:3.40.710.10, SSF56601		IPR012338	Beta-lactamase/transpeptidase-like
scaffold_24968_1	1448389.BAVQ01000001_gene2829	2e-63	248.4	tadA	3.5.4.1,3.5.4.33,3.8.1.5,6.3.4.19	ko:K01485,ko:K01563,ko:K04075,ko:K11991	ko00240,ko00330,ko00361,ko00625,ko01100,ko01120,map00240,map00330,map00361,map00625,map01100,map01120		R00974,R01411,R02922,R05284,R05367,R05368,R05369,R05370,R07669,R07670,R09597,R10223	RC00074,RC00477,RC00514,RC00809,RC01317,RC01340,RC01341,RC02013,RC02633,RC02634	ko00000,ko00001,ko01000,ko03016				FJ	Catalyzes the deamination of adenosine to inosine at the wobble position 34 of tRNA(Arg2)	Pfam, ProSitePatterns, PANTHER, CDD, PANTHER, Hamap, ProSiteProfiles, Gene3D, SUPERFAMILY	PF00383, PS00903, PTHR11079:SF169, cd01285, PTHR11079, MF_00972, PS51747, G3DSA:3.40.140.10, SSF53927	Cytidine and deoxycytidylate deaminase zinc-binding region, Cytidine and deoxycytidylate deaminases zinc-binding region signature, nucleoside_deaminase, tRNA-specific adenosine deaminase [tadA], Cytidine and deoxycytidylate deaminases domain profile.	IPR002125, IPR016192, IPR028883, IPR002125, IPR016193	Cytidine and deoxycytidylate deaminase domain, APOBEC/CMP deaminase, zinc-binding, tRNA-specific adenosine deaminase, Cytidine and deoxycytidylate deaminase domain, Cytidine deaminase-like	GO:0008270, GO:0016787, GO:0002100, GO:0008251, GO:0003824	Reactome: R-HSA-6782315,
scaffold_24968_2	1448389.BAVQ01000001_gene2828	1.2e-29	135.2												S	tRNA adenosine	TIGRFAM	TIGR03941	tRNA_deam_assoc: putative tRNA adenosine deaminase-associated protein	IPR023869	tRNA adenosine deaminase-associated protein, putative
scaffold_25142_1	1120933.ATUY01000002_gene87	2.2e-23	115.2												S	Terminase	NA	NA	NA	NA	NA	na	NA
scaffold_25142_2	33898.JRHJ01000001_gene725	1.5e-11	75.5												S	Phage portal protein, SPP1 Gp6-like	NA	NA	NA	NA	NA	na	NA
scaffold_25170_1	1095772.CAHH01000016_gene884	1.2e-56	226.5		1.7.1.15	ko:K00362	ko00910,ko01120,map00910,map01120	M00530	R00787	RC00176	ko00000,ko00001,ko00002,ko01000				Q	pyridine nucleotide-disulphide oxidoreductase	Pfam, Gene3D, PRINTS, PRINTS, PRINTS, SUPERFAMILY, PANTHER, Gene3D	PF07992, G3DSA:3.50.50.60, PR00411, PR00411, PR00411, SSF51905, PTHR43557, G3DSA:3.50.50.60	Pyridine nucleotide-disulphide oxidoreductase, Pyridine nucleotide disulphide reductase class-I signature, Pyridine nucleotide disulphide reductase class-I signature, Pyridine nucleotide disulphide reductase class-I signature	IPR023753, IPR036188, IPR036188, IPR036188	FAD/NAD(P)-binding domain, FAD/NAD(P)-binding domain superfamily, FAD/NAD(P)-binding domain superfamily, FAD/NAD(P)-binding domain superfamily	GO:0016491, GO:0055114
scaffold_25274_1	1448389.BAVQ01000016_gene4055	2e-83	315.5	clpC		ko:K03696	ko01100,map01100				ko00000,ko03110				O	Part of a stress-induced multi-chaperone system, it is involved in the recovery of the cell from heat-induced damage, in cooperation with DnaK, DnaJ and GrpE	Gene3D, SUPERFAMILY, SUPERFAMILY, Gene3D, PANTHER, MobiDBLite, Pfam, ProSiteProfiles, CDD	G3DSA:3.40.50.300, SSF52540, SSF52540, G3DSA:3.40.50.300, PTHR11638, mobidb-lite, PF17871, PS50151, cd00009	consensus disorder prediction, AAA lid domain, UVR domain profile, AAA	IPR027417, IPR027417, IPR041546, IPR001943	P-loop containing nucleoside triphosphate hydrolase, P-loop containing nucleoside triphosphate hydrolase, ClpA/ClpB, AAA lid domain, UVR domain	GO:0005515
scaffold_25315_1	1384484.AEQU_2269	2.3e-52	212.2	icaA		ko:K00786					ko00000,ko01000				M	Glycosyl transferase family 2	TMHMM, PANTHER, TMHMM, Pfam, PANTHER, TMHMM, TMHMM, SUPERFAMILY	TMhelix, PTHR43630, TMhelix, PF13632, PTHR43630:SF1, TMhelix, TMhelix, SSF53448	Region of a membrane-bound protein predicted to be embedded in the membrane, Region of a membrane-bound protein predicted to be embedded in the membrane, Glycosyl transferase family group 2, Region of a membrane-bound protein predicted to be embedded in the membrane, Region of a membrane-bound protein predicted to be embedded in the membrane.	IPR001173, IPR029044	Glycosyltransferase 2-like, Nucleotide-diphospho-sugar transferases		Reactome: R-HSA-913709,
scaffold_25367_1	1448389.BAVQ01000083_gene174	8.5e-75	286.2	ilvC	1.1.1.86	ko:K00053	ko00290,ko00770,ko01100,ko01110,ko01130,ko01210,ko01230,map00290,map00770,map01100,map01110,map01130,map01210,map01230	M00019,M00570	R03051,R04439,R04440,R05068,R05069,R05071	RC00726,RC00836,RC00837,RC01726	ko00000,ko00001,ko00002,ko01000				EH	Involved in the biosynthesis of branched-chain amino acids (BCAA). Catalyzes an alkyl-migration followed by a ketol- acid reduction of (S)-2-acetolactate (S2AL) to yield (R)-2,3- dihydroxy-isovalerate. In the isomerase reaction, S2AL is rearranged via a Mg-dependent methyl migration to produce 3- hydroxy-3-methyl-2-ketobutyrate (HMKB). In the reductase reaction, this 2-ketoacid undergoes a metal-…	Pfam, SUPERFAMILY, ProSiteProfiles, PANTHER, PANTHER, Gene3D	PF01450, SSF48179, PS51851, PTHR21371:SF1, PTHR21371, G3DSA:1.10.3730.40	Acetohydroxy acid isomeroreductase, catalytic domain, KARI C-terminal domain profile.	IPR000506, IPR008927, IPR000506, IPR013023	Ketol-acid reductoisomerase, C-terminal, 6-phosphogluconate dehydrogenase-like, C-terminal domain superfamily, Ketol-acid reductoisomerase, C-terminal, Ketol-acid reductoisomerase	GO:0003674, GO:0003824, GO:0005575, GO:0005622, GO:0005623, GO:0005737, GO:0005829, GO:0005886, GO:0008150, GO:0008152, GO:0008677, GO:0016020, GO:0016491, GO:0016614, GO:0016616, GO:0040007, GO:0044424, GO:0044444, GO:0044464, GO:0055114, GO:0071944GO:0004455, GO:0009082, GO:0055114, GO:0055114, GO:0004455, GO:0009082, GO:0055114, GO:0009082, GO:0016491, GO:0055114	KEGG: 00290+1.1.1.86, KEGG: 00770+1.1.1.86, MetaCyc: PWY-5103, MetaCyc: PWY-7111, KEGG: 00290+1.1.1.86, KEGG: 00770+1.1.1.86, MetaCyc: PWY-5103, MetaCyc: PWY-7111, KEGG: 00290+1.1.1.86, KEGG: 00770+1.1.1.86, MetaCyc: PWY-5103, MetaCyc: PWY-7111,
scaffold_25367_2	1448389.BAVQ01000083_gene175	1.1e-13	81.6												O	endopeptidase activity	NA	NA	NA	NA	NA	na	NA
scaffold_25400_1	1032480.MLP_17290	2.4e-31	141												S	COG NOG14600 non supervised orthologous group	MobiDBLite	mobidb-lite	consensus disorder prediction
scaffold_2559_2	1120941.AUBL01000013_gene498	7.9e-51	208.4												S	Polysaccharide biosynthesis protein	TMHMM, Pfam, TMHMM, TMHMM, TMHMM, TMHMM, PANTHER, TMHMM, TMHMM, TMHMM, TMHMM, TMHMM, TMHMM, TMHMM, TMHMM, TMHMM	TMhelix, PF01943, TMhelix, TMhelix, TMhelix, TMhelix, PTHR30250, TMhelix, TMhelix, TMhelix, TMhelix, TMhelix, TMhelix, TMhelix, TMhelix, TMhelix	Region of a membrane-bound protein predicted to be embedded in the membrane, Polysaccharide biosynthesis protein, Region of a membrane-bound protein predicted to be embedded in the membrane, Region of a membrane-bound protein predicted to be embedded in the membrane, Region of a membrane-bound protein predicted to be embedded in the membrane, Region of a membrane-bound protein predicted to be emb…	IPR002797	Polysaccharide biosynthesis protein	GO:0016020
scaffold_25590_1	443218.AS9A_0015	9.2e-10	70.5														MobiDBLite, MobiDBLite, MobiDBLite, MobiDBLite, MobiDBLite	mobidb-lite, mobidb-lite, mobidb-lite, mobidb-lite, mobidb-lite	consensus disorder prediction, consensus disorder prediction, consensus disorder prediction, consensus disorder prediction, consensus disorder prediction
scaffold_25720_1	1095772.CAHH01000069_gene432	8.8e-42	176.4	pecS											K	MarR family	Gene3D, SUPERFAMILY, PANTHER, PANTHER, Pfam	G3DSA:1.10.10.10, SSF46785, PTHR33164:SF63, PTHR33164, PF12802	MarR family	IPR036388, IPR036390, IPR000835	Winged helix-like DNA-binding domain superfamily, Winged helix DNA-binding domain superfamily, MarR-type HTH domain	GO:0003700, GO:0006355
scaffold_25888_1	1448389.BAVQ01000036_gene948	1.1e-66	259.2	drrB		ko:K01992		M00254			ko00000,ko00002,ko02000	3.A.1			V	Transport permease protein	PANTHER, ProSiteProfiles, TMHMM, TMHMM, Pfam, TMHMM, PANTHER, TMHMM	PTHR43077:SF1, PS51012, TMhelix, TMhelix, PF01061, TMhelix, PTHR43077, TMhelix	ABC transporter integral membrane type-2 domain profile, Region of a membrane-bound protein predicted to be embedded in the membrane, Region of a membrane-bound protein predicted to be embedded in the membrane, ABC-2 type transporter, Region of a membrane-bound protein predicted to be embedded in the membrane, Region of a membrane-bound protein predicted to be embedded in the membrane.	IPR000412, IPR013525	ABC-2 transporter, ABC-2 type transporter	GO:0016021, GO:0043190, GO:0055085, GO:0016020	Reactome: R-HSA-1369062,
scaffold_25888_2	1448389.BAVQ01000036_gene947	5.1e-18	96.7												K	Transcriptional regulator	NA	NA	NA	NA	NA	na	NA
scaffold_25928_1	1448389.BAVQ01000036_gene823	2.9e-95	354.8			ko:K07071					ko00000				S	epimerase	Gene3D, Gene3D, SUPERFAMILY, CDD, SUPERFAMILY	G3DSA:3.30.530.20, G3DSA:3.40.50.720, SSF55961, cd07820, SSF51735	SRPBCC_3	IPR023393, IPR036291	START-like domain superfamily, NAD(P)-binding domain superfamily
scaffold_26104_1	1448389.BAVQ01000005_gene3135	1.8e-87	328.6												C	Oxidoreductase FAD-binding domain	Gene3D, PANTHER, SUPERFAMILY, Pfam, PANTHER, ProSiteProfiles, SUPERFAMILY, CDD, Gene3D	G3DSA:3.40.50.80, PTHR47354:SF6, SSF54292, PF00111, PTHR47354, PS51085, SSF52343, cd00207, G3DSA:3.10.20.30	2Fe-2S iron-sulfur cluster binding domain, 2Fe-2S ferredoxin-type iron-sulfur binding domain profile, fer2	IPR039261, IPR036010, IPR001041, IPR001041, IPR039261, IPR001041, IPR012675	Ferredoxin-NADP reductase (FNR), nucleotide-binding domain, 2Fe-2S ferredoxin-like superfamily, 2Fe-2S ferredoxin-type iron-sulfur binding domain, 2Fe-2S ferredoxin-type iron-sulfur binding domain, Ferredoxin-NADP reductase (FNR), nucleotide-binding domain, 2Fe-2S ferredoxin-type iron-sulfur binding domain, Beta-grasp domain superfamily	GO:0000166, GO:0003674, GO:0003824, GO:0005488, GO:0006091, GO:0008150, GO:0008152, GO:0009055, GO:0009987, GO:0016491, GO:0022900, GO:0036094, GO:0043167, GO:0043168, GO:0044237, GO:0048037, GO:0050661, GO:0050662, GO:0055114, GO:0070402, GO:0097159, GO:1901265, GO:1901363GO:0009055, GO:0051536, GO:0009055, GO:0051536, GO:0009055, GO:0051536, GO:0009055, GO:0051536
scaffold_26181_1	1448389.BAVQ01000004_gene3701	3.1e-09	66.2	cysE	2.3.1.30	ko:K00640	ko00270,ko00920,ko01100,ko01110,ko01120,ko01200,ko01230,ko05111,map00270,map00920,map01100,map01110,map01120,map01200,map01230,map05111	M00021	R00586	RC00004,RC00041	ko00000,ko00001,ko00002,ko01000			iJN746.PP_0840	E	Serine acetyltransferase	MobiDBLite	mobidb-lite	consensus disorder prediction			GO:0000096, GO:0000097, GO:0003674, GO:0003824, GO:0005575, GO:0005622, GO:0005623, GO:0005737, GO:0005829, GO:0006082, GO:0006520, GO:0006534, GO:0006535, GO:0006563, GO:0006790, GO:0006807, GO:0008150, GO:0008152, GO:0008374, GO:0008652, GO:0009001, GO:0009058, GO:0009069, GO:0009070, GO:0009987, GO:0016053, GO:0016407, GO:0016412, GO:0016413, GO:0016740, GO:0016746, GO:0016747, GO:0019344, GO:…
scaffold_26181_2	1448389.BAVQ01000004_gene3700	3e-69	268.1												P	Flavoprotein involved in K transport	Pfam, PANTHER, SUPERFAMILY, PRINTS, PRINTS, PRINTS, Gene3D, PANTHER	PF13738, PTHR43539:SF28, SSF51905, PR00411, PR00411, PR00411, G3DSA:3.50.50.60, PTHR43539	Pyridine nucleotide-disulphide oxidoreductase, Pyridine nucleotide disulphide reductase class-I signature, Pyridine nucleotide disulphide reductase class-I signature, Pyridine nucleotide disulphide reductase class-I signature	IPR036188, IPR036188	FAD/NAD(P)-binding domain superfamily, FAD/NAD(P)-binding domain superfamily
scaffold_26248_3	67332.FM21_19335	3e-11	74.3		2.7.1.33	ko:K03525	ko00770,ko01100,map00770,map01100	M00120	R02971,R03018,R04391	RC00002,RC00017	ko00000,ko00001,ko00002,ko01000				M	Catalyzes the transfer of a N-acetyl-glucosamine moiety to 1D-myo-inositol 3-phosphate to produce 1D-myo-inositol 2- acetamido-2-deoxy-glucopyranoside 3-phosphate in the mycothiol biosynthesis pathway	CDD, Pfam, Gene3D, SUPERFAMILY	cd03800, PF00534, G3DSA:3.40.50.2000, SSF53756	GT4_sucrose_synthase, Glycosyl transferases group 1	IPR001296	Glycosyl transferase, family 1
scaffold_26318_1	1448389.BAVQ01000004_gene3738	2.4e-60	238	pin											L	Site-specific recombinases, DNA invertase Pin homologs	SUPERFAMILY, SUPERFAMILY, Pfam, ProSitePatterns, CDD, Pfam, CDD, Gene3D, Gene3D, SMART, ProSiteProfiles, PANTHER, PANTHER	SSF46689, SSF53041, PF00239, PS00398, cd03768, PF02796, cd00569, G3DSA:3.40.50.1390, G3DSA:1.10.10.60, SM00857, PS51736, PTHR30461:SF3, PTHR30461	Resolvase, N terminal domain, Site-specific recombinases signature 2, SR_ResInv, Helix-turn-helix domain of resolvase, HTH_Hin_like, Resolvase/invertase-type recombinase catalytic domain profile.	IPR009057, IPR036162, IPR006119, IPR006118, IPR006120, IPR036162, IPR006119, IPR006119	Homeobox-like domain superfamily, Resolvase-like, N-terminal catalytic domain superfamily, Resolvase, N-terminal catalytic domain, Recombinase, conserved site, Resolvase, HTH domain, Resolvase-like, N-terminal catalytic domain superfamily, Resolvase, N-terminal catalytic domain, Resolvase, N-terminal catalytic domain	GO:0003677, GO:0000150, GO:0003677, GO:0006310, GO:0000150, GO:0003677, GO:0006310, GO:0000150, GO:0006310, GO:0000150, GO:0003677, GO:0006310, GO:0000150, GO:0003677, GO:0006310, GO:0000150, GO:0003677, GO:0006310, GO:0000150, GO:0003677, GO:0006310
scaffold_26366_1	1448389.BAVQ01000043_gene1745	2.3e-76	292												C	Alpha/beta hydrolase	Coils, Pfam	Coil, PF06259	Alpha/beta hydrolase	IPR010427	Protein of unknown function DUF1023
scaffold_26505_1	1172188.KB911820_gene2937	4e-12	78.6														NA	NA	NA	NA	NA	na	NA
scaffold_26939_1	1448389.BAVQ01000043_gene1794	7.3e-99	366.7	dinG	2.7.7.7,3.6.4.12	ko:K02342,ko:K03722	ko00230,ko00240,ko01100,ko03030,ko03430,ko03440,map00230,map00240,map01100,map03030,map03430,map03440	M00260	R00375,R00376,R00377,R00378	RC02795	ko00000,ko00001,ko00002,ko01000,ko03032,ko03400				KL	helicase	Gene3D, PANTHER, PANTHER, SMART, MobiDBLite, Pfam	G3DSA:3.40.50.300, PTHR11472, PTHR11472:SF60, SM00491, mobidb-lite, PF13307	consensus disorder prediction, Helicase C-terminal domain	IPR006555, IPR006555	ATP-dependent helicase, C-terminal, ATP-dependent helicase, C-terminal	GO:0003674, GO:0003824, GO:0004386, GO:0004518, GO:0004527, GO:0005575, GO:0005622, GO:0005623, GO:0005737, GO:0005829, GO:0005886, GO:0006139, GO:0006259, GO:0006260, GO:0006261, GO:0006281, GO:0006301, GO:0006725, GO:0006807, GO:0006950, GO:0006974, GO:0008026, GO:0008150, GO:0008152, GO:0008408, GO:0009058, GO:0009059, GO:0009360, GO:0009987, GO:0016020, GO:0016462, GO:0016787, GO:0016788, GO:…
scaffold_26988_2	1122130.AUHN01000010_gene387	2.1e-27	128.3	yceD		ko:K07040					ko00000				S	metal-binding, possibly nucleic acid-binding protein	Coils, PANTHER, Pfam	Coil, PTHR34374, PF02620	Large ribosomal RNA subunit accumulation protein YceD	IPR003772	Large ribosomal RNA subunit accumulation protein YceD	GO:0005575, GO:0005622, GO:0005623, GO:0005737, GO:0005829, GO:0008150, GO:0040007, GO:0044424, GO:0044444, GO:0044464
scaffold_26995_1	1448389.BAVQ01000003_gene3488	4.9e-79	300.8	cho	2.7.7.7	ko:K02342,ko:K03763,ko:K05984	ko00230,ko00240,ko01100,ko03030,ko03430,ko03440,map00230,map00240,map01100,map03030,map03430,map03440	M00260	R00375,R00376,R00377,R00378	RC02795	ko00000,ko00001,ko00002,ko01000,ko03032,ko03400				L	DNA polymerase III, epsilon subunit	SUPERFAMILY, PANTHER	SSF46600, PTHR30562		IPR036876	UVR domain superfamily	GO:0003674, GO:0003824, GO:0004518, GO:0004519, GO:0004520, GO:0004536, GO:0005575, GO:0005618, GO:0005622, GO:0005623, GO:0005737, GO:0005829, GO:0005886, GO:0006139, GO:0006259, GO:0006281, GO:0006289, GO:0006725, GO:0006807, GO:0006950, GO:0006974, GO:0007154, GO:0008150, GO:0008152, GO:0009380, GO:0009432, GO:0009605, GO:0009987, GO:0009991, GO:0016020, GO:0016787, GO:0016788, GO:0030312, GO:…
scaffold_26996_1	1448389.BAVQ01000023_gene1457	7e-57	226.9	ybdK_1											S	glutamate--cysteine ligase	Gene3D, SUPERFAMILY	G3DSA:3.30.590.20, SSF55931		IPR014746	Glutamine synthetase/guanido kinase, catalytic domain	GO:0003824
scaffold_27021_1	1448389.BAVQ01000071_gene2412	4.3e-57	227.6												K	transcriptional regulator	MobiDBLite, ProSiteProfiles, PANTHER, Gene3D, MobiDBLite, SUPERFAMILY, PRINTS, PRINTS, PRINTS, PANTHER, Pfam, SMART	mobidb-lite, PS50995, PTHR33164, G3DSA:1.10.10.10, mobidb-lite, SSF46785, PR00598, PR00598, PR00598, PTHR33164:SF27, PF12802, SM00347	consensus disorder prediction, MarR-type HTH domain profile, consensus disorder prediction, Bacterial regulatory protein MarR family signature, Bacterial regulatory protein MarR family signature, Bacterial regulatory protein MarR family signature, MarR family	IPR000835, IPR036388, IPR036390, IPR000835, IPR000835, IPR000835, IPR000835, IPR000835	MarR-type HTH domain, Winged helix-like DNA-binding domain superfamily, Winged helix DNA-binding domain superfamily, MarR-type HTH domain, MarR-type HTH domain, MarR-type HTH domain, MarR-type HTH domain, MarR-type HTH domain	GO:0003700, GO:0006355, GO:0003700, GO:0006355, GO:0003700, GO:0006355, GO:0003700, GO:0006355, GO:0003700, GO:0006355, GO:0003700, GO:0006355
scaffold_27186_1	1448389.BAVQ01000083_gene195	4.7e-47	194.1												K	COG0663 Carbonic anhydrases acetyltransferases, isoleucine patch superfamily	PANTHER, CDD, PANTHER, Pfam, Gene3D, SUPERFAMILY	PTHR13061:SF0, cd04645, PTHR13061, PF00132, G3DSA:2.160.10.10, SSF51161	LbH_gamma_CA_like, Bacterial transferase hexapeptide (six repeats)	IPR001451, IPR011004	Hexapeptide repeat, Trimeric LpxA-like superfamily
scaffold_27186_2	1448389.BAVQ01000083_gene196	1.8e-12	77.8	ung	3.2.2.27	ko:K03648	ko03410,ko05340,map03410,map05340				ko00000,ko00001,ko01000,ko03400				L	Excises uracil residues from the DNA which can arise as a result of misincorporation of dUMP residues by DNA polymerase or due to deamination of cytosine	NA	NA	NA	NA	NA	GO:0003674, GO:0003824, GO:0004844, GO:0005575, GO:0005622, GO:0005623, GO:0005737, GO:0006139, GO:0006259, GO:0006281, GO:0006284, GO:0006285, GO:0006725, GO:0006807, GO:0006950, GO:0006974, GO:0008150, GO:0008152, GO:0009987, GO:0016787, GO:0016798, GO:0016799, GO:0019104, GO:0033554, GO:0034641, GO:0043170, GO:0044237, GO:0044238, GO:0044260, GO:0044424, GO:0044464, GO:0046483, GO:0050896, GO:…	NA
scaffold_27228_1	1448389.BAVQ01000070_gene2220	2.1e-85	321.6	dcd	3.5.4.13	ko:K01494	ko00240,ko01100,map00240,map01100	M00053	R00568,R02325	RC00074	ko00000,ko00001,ko00002,ko01000			iPC815.YPO1525	F	Belongs to the dCTP deaminase family	PANTHER, Pfam, Gene3D, SUPERFAMILY, TIGRFAM, CDD, PANTHER	PTHR42680:SF3, PF00692, G3DSA:2.70.40.10, SSF51283, TIGR02274, cd07557, PTHR42680	dUTPase, dCTP_deam: deoxycytidine triphosphate deaminase, trimeric_dUTPase	IPR029054, IPR036157, IPR036157, IPR011962, IPR033704	dUTPase-like, dUTPase-like superfamily, dUTPase-like superfamily, dCTP deaminase, dUTPase, trimeric	GO:0003674, GO:0003824, GO:0004170, GO:0005575, GO:0005622, GO:0005623, GO:0005737, GO:0005829, GO:0006139, GO:0006220, GO:0006244, GO:0006253, GO:0006725, GO:0006753, GO:0006793, GO:0006796, GO:0006807, GO:0008150, GO:0008152, GO:0008829, GO:0009056, GO:0009058, GO:0009117, GO:0009141, GO:0009143, GO:0009147, GO:0009149, GO:0009166, GO:0009200, GO:0009204, GO:0009211, GO:0009213, GO:0009219, GO:…
scaffold_27236_1	1448389.BAVQ01000006_gene3305	6.7e-105	386.7	ask	1.1.1.3,2.7.2.4	ko:K00928,ko:K12524	ko00260,ko00261,ko00270,ko00300,ko01100,ko01110,ko01120,ko01130,ko01210,ko01230,map00260,map00261,map00270,map00300,map01100,map01110,map01120,map01130,map01210,map01230	M00016,M00017,M00018,M00033,M00525,M00526,M00527	R00480,R01773,R01775	RC00002,RC00043,RC00087	ko00000,ko00001,ko00002,ko01000				E	Belongs to the aspartokinase family	SUPERFAMILY, Gene3D, PANTHER, TIGRFAM, PANTHER, Pfam	SSF53633, G3DSA:3.40.1160.10, PTHR21499:SF3, TIGR00657, PTHR21499, PF00696	asp_kinases: aspartate kinase, Amino acid kinase family	IPR036393, IPR036393, IPR001341, IPR001048	Acetylglutamate kinase-like superfamily, Acetylglutamate kinase-like superfamily, Aspartate kinase, Aspartate/glutamate/uridylate kinase	GO:0003674, GO:0003824, GO:0004072, GO:0005575, GO:0005618, GO:0005622, GO:0005623, GO:0005737, GO:0005886, GO:0006082, GO:0006520, GO:0006553, GO:0006793, GO:0006796, GO:0006807, GO:0008150, GO:0008152, GO:0008652, GO:0009058, GO:0009066, GO:0009067, GO:0009085, GO:0009089, GO:0009987, GO:0016020, GO:0016053, GO:0016301, GO:0016310, GO:0016740, GO:0016772, GO:0016774, GO:0019202, GO:0019752, GO:…	KEGG: 00260+2.7.2.4, KEGG: 00261+2.7.2.4, KEGG: 00270+2.7.2.4, KEGG: 00300+2.7.2.4, MetaCyc: PWY-2941, MetaCyc: PWY-2942, MetaCyc: PWY-5097, MetaCyc: PWY-6160, MetaCyc: PWY-6559, MetaCyc: PWY-6562, MetaCyc: PWY-7153, MetaCyc: PWY-7977, Reactome: R-HSA-8964539
scaffold_27311_1	1448389.BAVQ01000004_gene3697	5.4e-86	323.9	gabD	1.2.1.16,1.2.1.20,1.2.1.79	ko:K00135	ko00250,ko00310,ko00350,ko00650,ko00760,ko01100,ko01120,map00250,map00310,map00350,map00650,map00760,map01100,map01120	M00027	R00713,R00714,R02401	RC00080	ko00000,ko00001,ko00002,ko01000				C	Belongs to the aldehyde dehydrogenase family	Pfam, PANTHER, Gene3D, PANTHER, Gene3D, SUPERFAMILY	PF00171, PTHR43217:SF2, G3DSA:3.40.605.10, PTHR43217, G3DSA:3.40.309.10, SSF53720	Aldehyde dehydrogenase family	IPR015590, IPR016162, IPR016163, IPR016161	Aldehyde dehydrogenase domain, Aldehyde dehydrogenase, N-terminal, Aldehyde dehydrogenase, C-terminal, Aldehyde/histidinol dehydrogenase	GO:0016491, GO:0055114, GO:0016491, GO:0055114, GO:0016491, GO:0016620, GO:0055114, GO:0016491, GO:0055114
scaffold_27456_1	1125712.HMPREF1316_1217	9.7e-10	68.6	MA20_43635											M	Capsular polysaccharide synthesis protein	Pfam	PF05704	Capsular polysaccharide synthesis protein	IPR008441	Capsular polysaccharide synthesis protein
scaffold_27456_2	1125712.HMPREF1316_1227	1.4e-40	172.6		2.3.1.30	ko:K00640	ko00270,ko00920,ko01100,ko01110,ko01120,ko01200,ko01230,ko05111,map00270,map00920,map01100,map01110,map01120,map01200,map01230,map05111	M00021	R00586	RC00004,RC00041	ko00000,ko00001,ko00002,ko01000				E	serine acetyltransferase	SUPERFAMILY	SSF51161		IPR011004	Trimeric LpxA-like superfamily
scaffold_27468_2	1381751.JAJB01000050_gene145	5.4e-47	194.1												S	P22 coat protein-protein 5 domain protein	Pfam	PF11651	P22 coat protein - gene protein 5	IPR024659	Major capsid protein Gp5
scaffold_27478_1	1448389.BAVQ01000025_gene1299	1.6e-91	342	ymaE											S	Metallo-beta-lactamase superfamily	PANTHER, SUPERFAMILY	PTHR36839, SSF56281		IPR036866	Ribonuclease Z/Hydroxyacylglutathione hydrolase-like
scaffold_27493_1	1448389.BAVQ01000005_gene3126	9.4e-43	179.1												T	Response regulator receiver	Pfam, PANTHER, SMART, PANTHER, SUPERFAMILY, Gene3D, ProSiteProfiles, CDD	PF00486, PTHR26402, SM00862, PTHR26402:SF725, SSF46894, G3DSA:1.10.10.10, PS51755, cd00383	Transcriptional regulatory protein, C terminal, OmpR/PhoB-type DNA-binding domain profile, trans_reg_C	IPR001867, IPR039420, IPR001867, IPR016032, IPR036388, IPR001867, IPR001867	OmpR/PhoB-type DNA-binding domain, Transcriptional regulatory protein WalR-like, OmpR/PhoB-type DNA-binding domain, Signal transduction response regulator, C-terminal effector, Winged helix-like DNA-binding domain superfamily, OmpR/PhoB-type DNA-binding domain, OmpR/PhoB-type DNA-binding domain	GO:0000160, GO:0003677, GO:0006355, GO:0000160, GO:0003677, GO:0006355, GO:0003677, GO:0006355, GO:0000160, GO:0003677, GO:0006355, GO:0000160, GO:0003677, GO:0006355
scaffold_27493_2	1448389.BAVQ01000005_gene3127	4.6e-34	150.6	mtrB	2.7.13.3	ko:K02484,ko:K07653,ko:K07654	ko02020,map02020	M00460,M00461			ko00000,ko00001,ko00002,ko01000,ko01001,ko02022				T	Histidine kinase	TMHMM	TMhelix	Region of a membrane-bound protein predicted to be embedded in the membrane.			GO:0005575, GO:0005622, GO:0005623, GO:0005737, GO:0005829, GO:0008150, GO:0040007, GO:0044424, GO:0044444, GO:0044464
scaffold_27770_1	1122130.AUHN01000004_gene1343	2.6e-98	364.8	purA	6.3.4.4	ko:K01939	ko00230,ko00250,ko01100,map00230,map00250,map01100	M00049	R01135	RC00458,RC00459	ko00000,ko00001,ko00002,ko01000				F	Plays an important role in the de novo pathway of purine nucleotide biosynthesis. Catalyzes the first committed step in the biosynthesis of AMP from IMP	Gene3D, PANTHER, SUPERFAMILY, CDD, Hamap, SMART, Pfam, PANTHER, Gene3D	G3DSA:3.90.170.10, PTHR11846, SSF52540, cd03108, MF_00011, SM00788, PF00709, PTHR11846:SF0, G3DSA:3.40.440.10	AdSS, Adenylosuccinate synthetase [purA], Adenylosuccinate synthetase	IPR042111, IPR001114, IPR027417, IPR001114, IPR001114, IPR001114, IPR001114, IPR042109	Adenylosuccinate synthetase, domain 3, Adenylosuccinate synthetase, P-loop containing nucleoside triphosphate hydrolase, Adenylosuccinate synthetase, Adenylosuccinate synthetase, Adenylosuccinate synthetase, Adenylosuccinate synthetase, Adenylosuccinate synthetase, domain 1	GO:0003674, GO:0003824, GO:0004019, GO:0005575, GO:0005622, GO:0005623, GO:0005737, GO:0006139, GO:0006163, GO:0006164, GO:0006167, GO:0006725, GO:0006753, GO:0006793, GO:0006796, GO:0006807, GO:0008150, GO:0008152, GO:0009058, GO:0009117, GO:0009123, GO:0009124, GO:0009126, GO:0009127, GO:0009150, GO:0009152, GO:0009156, GO:0009161, GO:0009165, GO:0009167, GO:0009168, GO:0009259, GO:0009260, GO:…	KEGG: 00230+6.3.4.4, KEGG: 00250+6.3.4.4, MetaCyc: PWY-7219, Reactome: R-HSA-73817, KEGG: 00230+6.3.4.4, KEGG: 00250+6.3.4.4, MetaCyc: PWY-7219, Reactome: R-HSA-73817, KEGG: 00230+6.3.4.4, KEGG: 00250+6.3.4.4, MetaCyc: PWY-7219, Reactome: R-HSA-73817, KEGG: 00230+6.3.4.4, KEGG: 00250+6.3.4.4, MetaCyc: PWY-7219, Reactome: R-HSA-73817, KEGG: 00230+6.3.4.4, KEGG: 00250+6.3.4.4, MetaCyc: PWY-7219, Re…
scaffold_27776_1	1448389.BAVQ01000005_gene3119	7.8e-89	333.2	manB	5.4.2.2,5.4.2.8	ko:K01840,ko:K15778	ko00010,ko00030,ko00051,ko00052,ko00230,ko00500,ko00520,ko00521,ko01100,ko01110,ko01120,ko01130,map00010,map00030,map00051,map00052,map00230,map00500,map00520,map00521,map01100,map01110,map01120,map01130	M00114	R00959,R01057,R01818,R08639	RC00408	ko00000,ko00001,ko00002,ko01000			iECS88_1305.ECS88_2145,iECUMN_1333.ECUMN_2384,iUTI89_1310.UTI89_C2321	G	the resulting product is then converted to GDP-mannose by ManC which is then used in the synthesis of mannose-containing glycoconjugates that are important for mediating entry into host cells	SUPERFAMILY, Gene3D, PANTHER, SUPERFAMILY, Pfam, PANTHER, Pfam, Gene3D	SSF53738, G3DSA:3.40.120.10, PTHR43771:SF1, SSF55957, PF02880, PTHR43771, PF00408, G3DSA:3.30.310.50	Phosphoglucomutase/phosphomannomutase, alpha/beta/alpha domain III, Phosphoglucomutase/phosphomannomutase, C-terminal domain	IPR016055, IPR036900, IPR005846, IPR005843	Alpha-D-phosphohexomutase, alpha/beta/alpha I/II/III, Alpha-D-phosphohexomutase, C-terminal domain superfamily, Alpha-D-phosphohexomutase, alpha/beta/alpha domain III, Alpha-D-phosphohexomutase, C-terminal	GO:0000271, GO:0000287, GO:0003674, GO:0003824, GO:0004614, GO:0004615, GO:0005488, GO:0005975, GO:0005976, GO:0006082, GO:0006629, GO:0008150, GO:0008152, GO:0008610, GO:0008653, GO:0009058, GO:0009059, GO:0009103, GO:0009243, GO:0009244, GO:0009311, GO:0009312, GO:0009405, GO:0009987, GO:0016051, GO:0016053, GO:0016853, GO:0016866, GO:0016868, GO:0017144, GO:0019752, GO:0033692, GO:0034637, GO:…	KEGG: 00520+5.4.2.10, MetaCyc: PWY-6749, KEGG: 00520+5.4.2.10, MetaCyc: PWY-6749, KEGG: 00520+5.4.2.10, MetaCyc: PWY-6749, KEGG: 00520+5.4.2.10, MetaCyc: PWY-6749,
scaffold_27826_1	883077.HMPREF9241_01708	4e-25	121.3														NA	NA	NA	NA	NA	na	NA
scaffold_28003_1	1448389.BAVQ01000006_gene3206	5.8e-81	307	aspT											EK	COG1167 Transcriptional regulators containing a DNA-binding HTH domain and an aminotransferase domain (MocR family) and their eukaryotic orthologs	PANTHER, Pfam, Gene3D, SUPERFAMILY	PTHR43799, PF12897, G3DSA:3.90.1150.10, SSF53383	Alanine-glyoxylate amino-transferase	IPR024551, IPR024551, IPR015422, IPR015424	Aminotransferase, putative, Aminotransferase, putative, Pyridoxal phosphate-dependent transferase domain 1, Pyridoxal phosphate-dependent transferase	GO:0003824
scaffold_28010_1	1448389.BAVQ01000071_gene2413	2.8e-48	198	qor	1.6.5.5	ko:K00344					ko00000,ko01000				C	NAD(P)H quinone oxidoreductase, PIG3 family	Gene3D, PANTHER, Pfam, SUPERFAMILY, Gene3D, PANTHER	G3DSA:3.40.50.720, PTHR43006:SF7, PF13602, SSF51735, G3DSA:3.90.180.10, PTHR43006	Zinc-binding dehydrogenase	IPR036291	NAD(P)-binding domain superfamily
scaffold_28010_2	1448389.BAVQ01000071_gene2414	2.2e-28	131		3.5.1.104	ko:K22278					ko00000,ko01000				G	polysaccharide deacetylase	NA	NA	NA	NA	NA	na	NA
scaffold_28117_1	1448389.BAVQ01000006_gene3304	1.4e-67	262.7	tdsD											C	nitroreductase	PANTHER, MobiDBLite, Pfam, Gene3D, SUPERFAMILY, PANTHER	PTHR23026, mobidb-lite, PF00881, G3DSA:3.40.109.10, SSF55469, PTHR23026:SF100	consensus disorder prediction, Nitroreductase family	IPR029479, IPR000415, IPR000415	Nitroreductase, Nitroreductase-like, Nitroreductase-like	GO:0016491, GO:0016491	Reactome: R-HSA-209968, Reactome: R-HSA-209968, Reactome: R-HSA-209968,
scaffold_28118_1	1448389.BAVQ01000036_gene885	3.4e-86	324.3	ppa	3.6.1.1	ko:K01507	ko00190,map00190				ko00000,ko00001,ko01000			iNJ661.Rv3628	C	Catalyzes the hydrolysis of inorganic pyrophosphate (PPi) forming two phosphate ions	SUPERFAMILY, ProSitePatterns, CDD, Pfam, Hamap, Gene3D, PANTHER, PANTHER	SSF50324, PS00387, cd00412, PF00719, MF_00209, G3DSA:3.90.80.10, PTHR10286:SF0, PTHR10286	Inorganic pyrophosphatase signature, pyrophosphatase, Inorganic pyrophosphatase, Inorganic pyrophosphatase [ppa].	IPR036649, IPR008162, IPR008162, IPR008162, IPR008162, IPR036649, IPR008162	Inorganic pyrophosphatase superfamily, Inorganic pyrophosphatase, Inorganic pyrophosphatase, Inorganic pyrophosphatase, Inorganic pyrophosphatase, Inorganic pyrophosphatase superfamily, Inorganic pyrophosphatase	GO:0000287, GO:0003674, GO:0003824, GO:0004427, GO:0005488, GO:0005575, GO:0005622, GO:0005623, GO:0005737, GO:0005829, GO:0005886, GO:0006793, GO:0006796, GO:0008150, GO:0008152, GO:0009987, GO:0016020, GO:0016462, GO:0016787, GO:0016817, GO:0016818, GO:0043167, GO:0043169, GO:0044237, GO:0044424, GO:0044444, GO:0044464, GO:0046872, GO:0071944GO:0000287, GO:0004427, GO:0005737, GO:0006796, GO:00…	KEGG: 00190+3.6.1.1, MetaCyc: PWY-7805, MetaCyc: PWY-7807, Reactome: R-HSA-71737, KEGG: 00190+3.6.1.1, MetaCyc: PWY-7805, MetaCyc: PWY-7807, Reactome: R-HSA-71737, KEGG: 00190+3.6.1.1, MetaCyc: PWY-7805, MetaCyc: PWY-7807, Reactome: R-HSA-71737, KEGG: 00190+3.6.1.1, MetaCyc: PWY-7805, MetaCyc: PWY-7807, Reactome: R-HSA-71737, KEGG: 00190+3.6.1.1, MetaCyc: PWY-7805, MetaCyc: PWY-7807, Reactome: R-…
scaffold_282_14	754252.PFREUD_09020	7.7e-257	892.9	dhaB	4.2.1.28,4.2.1.30	ko:K01699,ko:K06120	ko00561,ko00640,map00561,map00640		R01047,R02376	RC00429,RC00707	ko00000,ko00001,ko01000				Q	Dehydratase large subunit	CDD, SUPERFAMILY, Pfam, Gene3D, PIRSF	cd03687, SSF51703, PF02286, G3DSA:3.20.20.350, PIRSF018507	Dehydratase_LU, Dehydratase large subunit	IPR003206, IPR016176, IPR003206, IPR036999, IPR003206	Diol/glycerol dehydratase, large subunit, Cobalamin (vitamin B12)-dependent enzyme, catalytic, Diol/glycerol dehydratase, large subunit, Diol/glycerol dehydratase, large subunit superfamily, Diol/glycerol dehydratase, large subunit	GO:0016836, GO:0031419, GO:0003824, GO:0031419, GO:0016836, GO:0031419, GO:0016836, GO:0031419, GO:0016836, GO:0031419	Reactome: R-HSA-196741, Reactome: R-HSA-3359475, Reactome: R-HSA-3359478, Reactome: R-HSA-71032,
scaffold_28225_1	1120933.ATUY01000002_gene92	1.4e-43	183												S	Phage capsid family	SUPERFAMILY, Gene3D, TIGRFAM, Pfam	SSF56563, G3DSA:3.30.2400.10, TIGR01554, PF05065	major_cap_HK97: phage major capsid protein, HK97 family, Phage capsid family	IPR024455, IPR024455	Phage capsid, Phage capsid
scaffold_28246_1	1448389.BAVQ01000004_gene3697	5e-43	181	gabD	1.2.1.16,1.2.1.20,1.2.1.79	ko:K00135	ko00250,ko00310,ko00350,ko00650,ko00760,ko01100,ko01120,map00250,map00310,map00350,map00650,map00760,map01100,map01120	M00027	R00713,R00714,R02401	RC00080	ko00000,ko00001,ko00002,ko01000				C	Belongs to the aldehyde dehydrogenase family	Pfam, Gene3D, MobiDBLite, PANTHER, SUPERFAMILY	PF00171, G3DSA:3.40.605.10, mobidb-lite, PTHR43217, SSF53720	Aldehyde dehydrogenase family, consensus disorder prediction	IPR015590, IPR016162, IPR016161	Aldehyde dehydrogenase domain, Aldehyde dehydrogenase, N-terminal, Aldehyde/histidinol dehydrogenase	GO:0016491, GO:0055114, GO:0016491, GO:0055114, GO:0016491, GO:0055114
scaffold_28317_1	1043205.AFYF01000058_gene2433	3.3e-09	67.8														MobiDBLite	mobidb-lite	consensus disorder prediction
scaffold_28477_1	1448389.BAVQ01000006_gene3189	8.3e-92	343.2		3.6.3.54	ko:K17686	ko01524,ko04016,map01524,map04016		R00086	RC00002	ko00000,ko00001,ko01000	3.A.3.5			P	Heavy metal translocating P-type atpase	Gene3D, TMHMM, TMHMM, PANTHER, TIGRFAM, SUPERFAMILY, Pfam, PANTHER	G3DSA:2.70.150.20, TMhelix, TMhelix, PTHR43520:SF8, TIGR01494, SSF81653, PF00122, PTHR43520	Region of a membrane-bound protein predicted to be embedded in the membrane, Region of a membrane-bound protein predicted to be embedded in the membrane, ATPase_P-type: HAD ATPase, P-type, family IC, E1-E2 ATPase	IPR001757, IPR008250	P-type ATPase, P-type ATPase, A domain superfamily	GO:0016021	Reactome: R-HSA-936837, Reactome: R-HSA-936837,
scaffold_28480_1	330084.JNYZ01000003_gene2299	5.2e-24	117.9														MobiDBLite, MobiDBLite	mobidb-lite, mobidb-lite	consensus disorder prediction, consensus disorder prediction
scaffold_28528_1	1292020.H483_0108430	6.6e-62	243.4	icd	1.1.1.42	ko:K00031	ko00020,ko00480,ko00720,ko01100,ko01110,ko01120,ko01130,ko01200,ko01210,ko01230,ko04146,map00020,map00480,map00720,map01100,map01110,map01120,map01130,map01200,map01210,map01230,map04146	M00009,M00010,M00173,M00740	R00267,R00268,R01899	RC00001,RC00084,RC00114,RC00626,RC02801	br01601,ko00000,ko00001,ko00002,ko01000				C	Isocitrate dehydrogenase	Pfam, PANTHER, SUPERFAMILY	PF03971, PTHR36999, SSF53659	Monomeric isocitrate dehydrogenase	IPR004436, IPR004436	Isocitrate dehydrogenase NADP-dependent, monomeric, Isocitrate dehydrogenase NADP-dependent, monomeric	GO:0004450, GO:0006099, GO:0055114, GO:0004450, GO:0006099, GO:0055114	KEGG: 00020+1.1.1.42, KEGG: 00480+1.1.1.42, KEGG: 00720+1.1.1.42, MetaCyc: PWY-5913, MetaCyc: PWY-6549, MetaCyc: PWY-6728, MetaCyc: PWY-6969, MetaCyc: PWY-7124, MetaCyc: PWY-7254, MetaCyc: PWY-7268, KEGG: 00020+1.1.1.42, KEGG: 00480+1.1.1.42, KEGG: 00720+1.1.1.42, MetaCyc: PWY-5913, MetaCyc: PWY-6549, MetaCyc: PWY-6728, MetaCyc: PWY-6969, MetaCyc: PWY-7124, MetaCyc: PWY-7254, MetaCyc: PWY-7268,
scaffold_28605_1	1095772.CAHH01000012_gene1968	1.7e-18	99.4														TMHMM	TMhelix	Region of a membrane-bound protein predicted to be embedded in the membrane.
scaffold_28648_1	1448389.BAVQ01000006_gene3192	1.6e-76	292.4												S	Belongs to the short-chain dehydrogenases reductases (SDR) family	SUPERFAMILY, Gene3D, PANTHER, CDD, SignalP_GRAM_NEGATIVE, Pfam, SignalP_GRAM_POSITIVE, ProSitePatterns, SMART, PRINTS, PRINTS, PRINTS, PRINTS, PRINTS, PRINTS, PRINTS, PRINTS, PANTHER	SSF51735, G3DSA:3.40.50.720, PTHR43391:SF34, cd05374, SignalP-noTM, PF00106, SignalP-TM, PS00061, SM00822, PR00080, PR00080, PR00080, PR00081, PR00081, PR00081, PR00081, PR00081, PTHR43391	17beta-HSD-like_SDR_c, short chain dehydrogenase, Short-chain dehydrogenases/reductases family signature, This enzymatic domain is part of bacterial polyketide synthases and catalyses the first step in the reductive modification of the beta-carbonyl centres in the growing polyketide chain. It uses NADPH to reduce the keto group to a hydroxy group, Short-chain dehydrogenase/reductase (SDR) superfa…	IPR036291, IPR002347, IPR020904, IPR002347, IPR002347, IPR002347, IPR002347, IPR002347, IPR002347, IPR002347, IPR002347	NAD(P)-binding domain superfamily, Short-chain dehydrogenase/reductase SDR, Short-chain dehydrogenase/reductase, conserved site, Short-chain dehydrogenase/reductase SDR, Short-chain dehydrogenase/reductase SDR, Short-chain dehydrogenase/reductase SDR, Short-chain dehydrogenase/reductase SDR, Short-chain dehydrogenase/reductase SDR, Short-chain dehydrogenase/reductase SDR, Short-chain dehydrogenas…	GO:0016491
scaffold_28688_1	471856.Jden_2094	8.9e-78	296.6	nadB	1.3.5.4,1.4.3.16,2.4.2.19	ko:K00244,ko:K00278,ko:K00767	ko00020,ko00190,ko00250,ko00620,ko00650,ko00720,ko00760,ko01100,ko01110,ko01120,ko01130,ko01200,ko02020,map00020,map00190,map00250,map00620,map00650,map00720,map00760,map01100,map01110,map01120,map01130,map01200,map02020	M00009,M00011,M00115,M00150,M00173	R00357,R00481,R02164,R03348	RC00006,RC00045,RC02566,RC02877	ko00000,ko00001,ko00002,ko01000				H	Catalyzes the oxidation of L-aspartate to iminoaspartate	Pfam, Gene3D, PANTHER, SUPERFAMILY, PANTHER	PF00890, G3DSA:3.50.50.60, PTHR42716, SSF51905, PTHR42716:SF2	FAD binding domain	IPR003953, IPR036188, IPR036188, IPR005288	FAD-dependent oxidoreductase 2, FAD binding domain, FAD/NAD(P)-binding domain superfamily, FAD/NAD(P)-binding domain superfamily, L-aspartate oxidase	GO:0008734, GO:0009435, GO:0055114	Reactome: R-HSA-611105, Reactome: R-HSA-71403, KEGG: 00250+1.4.3.16, KEGG: 00760+1.4.3.16, MetaCyc: PWY-5316, MetaCyc: PWY-7342
scaffold_28718_1	1448389.BAVQ01000003_gene3545	3.3e-85	321.2	fabD	2.3.1.180,2.3.1.39	ko:K00645,ko:K00648	ko00061,ko00333,ko01100,ko01130,ko01212,map00061,map00333,map01100,map01130,map01212	M00082,M00083	R01626,R10707,R11671	RC00004,RC00039,RC02727,RC02729,RC02888	ko00000,ko00001,ko00002,ko01000,ko01004				I	PFAM Acyl transferase	SUPERFAMILY, SMART, Pfam, Gene3D, PANTHER, SUPERFAMILY	SSF52151, SM00827, PF00698, G3DSA:3.40.366.20, PTHR42681, SSF55048	Acyl transferase domain in polyketide synthase (PKS) enzymes, Acyl transferase domain	IPR016035, IPR020801, IPR014043, IPR016036	Acyl transferase/acyl hydrolase/lysophospholipase, Polyketide synthase, acyl transferase domain, Acyl transferase, Malonyl-CoA ACP transacylase, ACP-binding	GO:0003674, GO:0003824, GO:0004312, GO:0004314, GO:0005575, GO:0005622, GO:0005623, GO:0005737, GO:0005829, GO:0005835, GO:0006082, GO:0006629, GO:0006631, GO:0006633, GO:0008150, GO:0008152, GO:0008610, GO:0009058, GO:0009987, GO:0016053, GO:0016417, GO:0016419, GO:0016420, GO:0016740, GO:0016746, GO:0016747, GO:0019752, GO:0032787, GO:0032991, GO:0043436, GO:0044237, GO:0044238, GO:0044249, GO:…
scaffold_28737_1	1448389.BAVQ01000036_gene869	7.8e-58	230.3												S	Psort location CytoplasmicMembrane, score	TMHMM, TMHMM, TMHMM, TMHMM, TMHMM	TMhelix, TMhelix, TMhelix, TMhelix, TMhelix	Region of a membrane-bound protein predicted to be embedded in the membrane, Region of a membrane-bound protein predicted to be embedded in the membrane, Region of a membrane-bound protein predicted to be embedded in the membrane, Region of a membrane-bound protein predicted to be embedded in the membrane, Region of a membrane-bound protein predicted to be embedded in the membrane.
scaffold_28923_1	42256.RradSPS_2195	5.3e-14	84.3														MobiDBLite, SignalP_GRAM_NEGATIVE, SignalP_EUK, MobiDBLite, SignalP_GRAM_POSITIVE	mobidb-lite, SignalP-noTM, SignalP-noTM, mobidb-lite, SignalP-TM	consensus disorder prediction, consensus disorder prediction
scaffold_28935_1	479431.Namu_0259	2.8e-39	168.7	xdhA	1.17.1.4,1.2.5.3	ko:K03518,ko:K13481,ko:K13482	ko00230,ko01100,ko01120,map00230,map01100,map01120	M00546	R01768,R02103,R11168	RC00143,RC02800	ko00000,ko00001,ko00002,ko01000				F	Xanthine dehydrogenase iron-sulfur cluster and FAD-binding subunit A	Pfam, Gene3D, PANTHER, Gene3D, PANTHER, SUPERFAMILY, SUPERFAMILY, Pfam, SUPERFAMILY	PF01799, G3DSA:3.30.365.10, PTHR11908:SF100, G3DSA:1.10.150.120, PTHR11908, SSF56176, SSF47741, PF00941, SSF47741	[2Fe-2S] binding domain, FAD binding domain in molybdopterin dehydrogenase	IPR002888, IPR036318, IPR036884, IPR002346, IPR036884	2Fe-2S]-binding, FAD-binding, type PCMH-like superfamily, 2Fe-2S]-binding domain superfamily, Molybdopterin dehydrogenase, FAD-binding, 2Fe-2S]-binding domain superfamily	GO:0016491, GO:0046872, GO:0055114, GO:0050660, GO:0016491, GO:0055114
scaffold_28947_1	1448389.BAVQ01000084_gene7	5.5e-96	357.1												S	Uncharacterised conserved protein (DUF2156)	PANTHER, Pfam	PTHR34697, PF09924	Uncharacterised conserved protein (DUF2156)	IPR024320	Phosphatidylglycerol lysyltransferase, C-terminal
scaffold_29028_1	1077144.AGFF01000007_gene1970	3.8e-97	360.9			ko:K02066	ko02010,map02010	M00210,M00669,M00670			ko00000,ko00001,ko00002,ko02000	3.A.1.27			Q	ABC-type transport system involved in resistance to organic solvents, permease component	TMHMM, TMHMM, Pfam, PANTHER, TMHMM, TMHMM, PANTHER	TMhelix, TMhelix, PF02405, PTHR30188:SF4, TMhelix, TMhelix, PTHR30188	Region of a membrane-bound protein predicted to be embedded in the membrane, Region of a membrane-bound protein predicted to be embedded in the membrane, Permease MlaE, Region of a membrane-bound protein predicted to be embedded in the membrane, Region of a membrane-bound protein predicted to be embedded in the membrane.	IPR030802, IPR030802	ABC transporter permease MalE, ABC transporter permease MalE	GO:0043190, GO:0043190
scaffold_29046_1	1284679.HMPREF1626_07215	1.3e-17	95.5			ko:K02026		M00207			ko00000,ko00002,ko02000	3.A.1.1			P	ABC transporter permease	TMHMM, Gene3D, TMHMM, SUPERFAMILY, PANTHER	TMhelix, G3DSA:1.10.3720.10, TMhelix, SSF161098, PTHR43744	Region of a membrane-bound protein predicted to be embedded in the membrane, Region of a membrane-bound protein predicted to be embedded in the membrane.	IPR035906, IPR035906	MetI-like superfamily, MetI-like superfamily
scaffold_29280_1	1095772.CAHH01000018_gene965	8.6e-62	243		3.2.1.23	ko:K12308	ko00052,map00052		R01105	RC00452	ko00000,ko00001,ko01000				G	Beta-galactosidase	PANTHER, Gene3D, SUPERFAMILY, Pfam, MobiDBLite	PTHR36447, G3DSA:3.20.20.80, SSF51445, PF02449, mobidb-lite	Beta-galactosidase, consensus disorder prediction	IPR003476, IPR017853, IPR013529	Glycoside hydrolase, family 42, Glycoside hydrolase superfamily, Glycoside hydrolase, family 42, N-terminal	GO:0004565, GO:0005975, GO:0004565, GO:0005975, GO:0009341	KEGG: 00052+3.2.1.23, KEGG: 00511+3.2.1.23, KEGG: 00531+3.2.1.23, KEGG: 00600+3.2.1.23, KEGG: 00604+3.2.1.23, MetaCyc: PWY-6807, KEGG: 00052+3.2.1.23, KEGG: 00511+3.2.1.23, KEGG: 00531+3.2.1.23, KEGG: 00600+3.2.1.23, KEGG: 00604+3.2.1.23, MetaCyc: PWY-6807,
scaffold_29280_2	548479.HMPREF0573_10217	1.6e-09	67.4			ko:K02026		M00207			ko00000,ko00002,ko02000	3.A.1.1			P	ABC transporter permease	TMHMM, SUPERFAMILY	TMhelix, SSF161098	Region of a membrane-bound protein predicted to be embedded in the membrane.	IPR035906	MetI-like superfamily
scaffold_29524_1	1448389.BAVQ01000025_gene1290	9.3e-64	250	ramA		ko:K21685					ko00000,ko03000				K	Transcriptional regulator	SUPERFAMILY, Gene3D	SSF55781, G3DSA:3.30.450.40		IPR029016	GAF-like domain superfamily	GO:0003674, GO:0003676, GO:0003677, GO:0005488, GO:0006082, GO:0006083, GO:0006355, GO:0008150, GO:0008152, GO:0009889, GO:0009987, GO:0010468, GO:0010556, GO:0016999, GO:0017144, GO:0019219, GO:0019222, GO:0019752, GO:0031323, GO:0031326, GO:0032787, GO:0043436, GO:0044237, GO:0044281, GO:0050789, GO:0050794, GO:0051171, GO:0051252, GO:0060255, GO:0065007, GO:0071704, GO:0080090, GO:0097159, GO:…
scaffold_29578_1	1448389.BAVQ01000015_gene4131	2.7e-71	275	traA											L	DNA-dependent ATPase and ATP-dependent 5-3 DNA helicase. Has no activity on blunt DNA or DNA with 3-overhangs, requires at least 10 bases of 5-ssDNA for helicase activity	Pfam, Gene3D, SUPERFAMILY, CDD	PF13604, G3DSA:3.40.50.300, SSF52540, cd17933	AAA domain, DEXSc_RecD-like	IPR027417	P-loop containing nucleoside triphosphate hydrolase
scaffold_29588_1	1448389.BAVQ01000023_gene1408	2.5e-64	251.9	ligD	6.5.1.1,6.5.1.6,6.5.1.7	ko:K01971,ko:K10747	ko03030,ko03410,ko03420,ko03430,ko03450,map03030,map03410,map03420,map03430,map03450		R00381,R00382,R10822,R10823	RC00005	ko00000,ko00001,ko01000,ko03032,ko03400				L	DNA polymerase LigD polymerase domain	Gene3D, PANTHER, Pfam, SUPERFAMILY, ProSitePatterns, PANTHER, Pfam	G3DSA:3.30.470.30, PTHR39465:SF2, PF13298, SSF56091, PS00697, PTHR39465, PF01068	DNA polymerase Ligase (LigD), ATP-dependent DNA ligase AMP-binding site, ATP dependent DNA ligase domain	IPR014144, IPR016059, IPR012310	\DNA ligase D, 3-phosphoesterase domain\", DNA ligase, ATP-dependent, conserved site, DNA ligase, ATP-dependent, central"	GO:0000166, GO:0000287, GO:0000726, GO:0003674, GO:0003676, GO:0003677, GO:0003824, GO:0003887, GO:0003896, GO:0003899, GO:0003909, GO:0003910, GO:0004518, GO:0004527, GO:0004529, GO:0004536, GO:0004652, GO:0005488, GO:0005524, GO:0005575, GO:0005623, GO:0005886, GO:0006139, GO:0006259, GO:0006260, GO:0006261, GO:0006266, GO:0006269, GO:0006281, GO:0006302, GO:0006303, GO:0006725, GO:0006807, GO:…
scaffold_29768_1	1448389.BAVQ01000083_gene164	4.4e-90	337.4	pfkA	2.7.1.11,2.7.1.90	ko:K00850,ko:K02351,ko:K07245,ko:K21071	ko00010,ko00030,ko00051,ko00052,ko00680,ko01100,ko01110,ko01120,ko01130,ko01200,ko01230,ko03018,ko04152,ko05230,map00010,map00030,map00051,map00052,map00680,map01100,map01110,map01120,map01130,map01200,map01230,map03018,map04152,map05230	M00001,M00345	R00756,R00764,R02073,R03236,R03237,R03238,R03239,R04779	RC00002,RC00017	ko00000,ko00001,ko00002,ko01000,ko01009,ko02000,ko03019	9.B.62.1			G	Catalyzes the phosphorylation of D-fructose 6-phosphate to fructose 1,6-bisphosphate by ATP, the first committing step of glycolysis	PANTHER, PANTHER, Pfam, SUPERFAMILY, Gene3D, PRINTS, PRINTS, PRINTS, PRINTS, PRINTS	PTHR13697:SF52, PTHR13697, PF00365, SSF53784, G3DSA:3.40.50.460, PR00476, PR00476, PR00476, PR00476, PR00476	Phosphofructokinase, ATP-dependent phosphofructokinase family signature, ATP-dependent phosphofructokinase family signature, ATP-dependent phosphofructokinase family signature, ATP-dependent phosphofructokinase family signature, ATP-dependent phosphofructokinase family signature	IPR000023, IPR035966, IPR022953, IPR022953, IPR022953, IPR022953, IPR022953	Phosphofructokinase domain, Phosphofructokinase superfamily, ATP-dependent 6-phosphofructokinase, ATP-dependent 6-phosphofructokinase, ATP-dependent 6-phosphofructokinase, ATP-dependent 6-phosphofructokinase, ATP-dependent 6-phosphofructokinase	GO:0005575, GO:0005618, GO:0005623, GO:0005886, GO:0016020, GO:0030312, GO:0044464, GO:0071944GO:0003872, GO:0006096, GO:0003872, GO:0006096, GO:0003872, GO:0006002, GO:0006096, GO:0003872, GO:0006002, GO:0006096, GO:0003872, GO:0006002, GO:0006096, GO:0003872, GO:0006002, GO:0006096, GO:0003872, GO:0006002, GO:0006096	KEGG: 00010+2.7.1.11, KEGG: 00030+2.7.1.11, KEGG: 00051+2.7.1.11, KEGG: 00052+2.7.1.11, KEGG: 00680+2.7.1.11, MetaCyc: PWY-1042, MetaCyc: PWY-1861, MetaCyc: PWY-5484, MetaCyc: PWY-7385, Reactome: R-HSA-70171, KEGG: 00010+2.7.1.11, KEGG: 00030+2.7.1.11, KEGG: 00051+2.7.1.11, KEGG: 00052+2.7.1.11, KEGG: 00680+2.7.1.11, MetaCyc: PWY-1042, MetaCyc: PWY-1861, MetaCyc: PWY-5484, MetaCyc: PWY-7385, Reac…
scaffold_29780_2	1448389.BAVQ01000030_gene681	9.1e-37	159.5												T	response regulator, receiver	SMART, Pfam, PANTHER, Gene3D, CDD, PANTHER, ProSiteProfiles, SUPERFAMILY	SM00448, PF00072, PTHR43214, G3DSA:3.40.50.12740, cd00156, PTHR43214:SF29, PS50110, SSF52172	Response regulator receiver domain, REC, Response regulatory domain profile.	IPR001789, IPR001789, IPR001789, IPR001789, IPR011006	Signal transduction response regulator, receiver domain, Signal transduction response regulator, receiver domain, Signal transduction response regulator, receiver domain, Signal transduction response regulator, receiver domain, CheY-like superfamily	GO:0000160, GO:0000160, GO:0000160, GO:0000160
scaffold_29868_1	1448389.BAVQ01000007_gene4196	7.1e-73	280	rluC	5.4.99.24	ko:K06179					ko00000,ko01000,ko03009				J	Responsible for synthesis of pseudouridine from uracil	Pfam, PANTHER, CDD, Gene3D, PANTHER, SUPERFAMILY	PF00849, PTHR21600:SF46, cd02869, G3DSA:3.30.2350.10, PTHR21600, SSF55120	RNA pseudouridylate synthase, PseudoU_synth_RluCD_like	IPR006145, IPR006145, IPR020103	Pseudouridine synthase, RsuA/RluA, Pseudouridine synthase, RsuA/RluA, Pseudouridine synthase, catalytic domain superfamily	GO:0000154, GO:0000455, GO:0001522, GO:0003674, GO:0003824, GO:0005575, GO:0005622, GO:0005623, GO:0005737, GO:0005829, GO:0006139, GO:0006364, GO:0006396, GO:0006725, GO:0006807, GO:0008150, GO:0008152, GO:0009451, GO:0009982, GO:0009987, GO:0010467, GO:0016070, GO:0016072, GO:0016853, GO:0016866, GO:0022613, GO:0031118, GO:0034470, GO:0034641, GO:0034660, GO:0042254, GO:0043170, GO:0043412, GO:…
scaffold_29903_1	1448389.BAVQ01000005_gene3141	3.3e-69	267.7	ltp3	2.3.1.9	ko:K00626	ko00071,ko00072,ko00280,ko00310,ko00362,ko00380,ko00620,ko00630,ko00640,ko00650,ko00720,ko00900,ko01100,ko01110,ko01120,ko01130,ko01200,ko01212,ko02020,map00071,map00072,map00280,map00310,map00362,map00380,map00620,map00630,map00640,map00650,map00720,map00900,map01100,map01110,map01120,map01130,map01200,map01212,map02020	M00088,M00095,M00373,M00374,M00375	R00238,R01177	RC00004,RC00326	ko00000,ko00001,ko00002,ko01000,ko04147				I	Catalyzes the synthesis of acetoacetyl coenzyme A from two molecules of acetyl coenzyme A. It can also act as a thiolase, catalyzing the reverse reaction and generating two-carbon units from the four-carbon product of fatty acid oxidation	PANTHER, Gene3D, SUPERFAMILY, PANTHER	PTHR42870:SF1, G3DSA:3.40.47.10, SSF53901, PTHR42870		IPR016039, IPR016039	Thiolase-like, Thiolase-like	GO:0003824, GO:0003824
scaffold_29903_2	1448389.BAVQ01000005_gene3142	1e-13	81.6	ltp4	2.3.1.9	ko:K00626	ko00071,ko00072,ko00280,ko00310,ko00362,ko00380,ko00620,ko00630,ko00640,ko00650,ko00720,ko00900,ko01100,ko01110,ko01120,ko01130,ko01200,ko01212,ko02020,map00071,map00072,map00280,map00310,map00362,map00380,map00620,map00630,map00640,map00650,map00720,map00900,map01100,map01110,map01120,map01130,map01200,map01212,map02020	M00088,M00095,M00373,M00374,M00375	R00238,R01177	RC00004,RC00326	ko00000,ko00001,ko00002,ko01000,ko04147				I	lipid-transfer protein	NA	NA	NA	NA	NA	na	NA
scaffold_29955_1	1448389.BAVQ01000022_gene1595	2.2e-102	378.3			ko:K07124					ko00000				S	PFAM Short-chain dehydrogenase reductase SDR	Pfam, PRINTS, PRINTS, PRINTS, PRINTS, PRINTS, PANTHER, SUPERFAMILY, PANTHER, Gene3D	PF00106, PR00081, PR00081, PR00081, PR00081, PR00081, PTHR43899, SSF51735, PTHR43899:SF13, G3DSA:3.40.50.720	short chain dehydrogenase, Glucose/ribitol dehydrogenase family signature, Glucose/ribitol dehydrogenase family signature, Glucose/ribitol dehydrogenase family signature, Glucose/ribitol dehydrogenase family signature, Glucose/ribitol dehydrogenase family signature	IPR002347, IPR002347, IPR002347, IPR002347, IPR002347, IPR002347, IPR036291	Short-chain dehydrogenase/reductase SDR, Short-chain dehydrogenase/reductase SDR, Short-chain dehydrogenase/reductase SDR, Short-chain dehydrogenase/reductase SDR, Short-chain dehydrogenase/reductase SDR, Short-chain dehydrogenase/reductase SDR, NAD(P)-binding domain superfamily
scaffold_29971_1	1095772.CAHH01000009_gene2139	1.5e-69	269.2		2.7.7.7	ko:K02335	ko00230,ko00240,ko01100,ko03030,ko03410,ko03420,ko03440,map00230,map00240,map01100,map03030,map03410,map03420,map03440		R00375,R00376,R00377,R00378	RC02795	ko00000,ko00001,ko01000,ko03032,ko03400				L	DNA polymerase	SUPERFAMILY	SSF56672
scaffold_30058_1	1095772.CAHH01000052_gene246	1.4e-09	67.8														NA	NA	NA	NA	NA	na	NA
scaffold_30086_1	1448389.BAVQ01000043_gene1839	1.2e-95	355.9	fadE23	1.3.8.7	ko:K00249	ko00071,ko00280,ko00410,ko00640,ko01100,ko01110,ko01130,ko01200,ko01212,ko03320,map00071,map00280,map00410,map00640,map01100,map01110,map01130,map01200,map01212,map03320	M00013,M00036,M00087	R00924,R01175,R01279,R02661,R03172,R03777,R03857,R03990,R04095,R04432,R04751,R04754	RC00052,RC00068,RC00076,RC00095,RC00148,RC00246	ko00000,ko00001,ko00002,ko01000				I	acyl-CoA dehydrogenase	PANTHER, SUPERFAMILY, Pfam, Gene3D, PANTHER	PTHR43516:SF5, SSF56645, PF02770, G3DSA:2.40.110.10, PTHR43516	Acyl-CoA dehydrogenase, middle domain	IPR009100, IPR006091	Acyl-CoA dehydrogenase/oxidase, N-terminal and middle domain superfamily, Acyl-CoA oxidase/dehydrogenase, central domain	GO:0016627, GO:0055114, GO:0016627, GO:0055114
scaffold_30127_1	1043205.AFYF01000035_gene122	2.8e-84	318.2												L	Transposase	Pfam, ProSitePatterns, PANTHER, PANTHER	PF00872, PS01007, PTHR33217:SF5, PTHR33217	Transposase, Mutator family, Transposases, Mutator family, signature.	IPR001207, IPR001207, IPR001207	Transposase, mutator type, Transposase, mutator type, Transposase, mutator type	GO:0003677, GO:0004803, GO:0006313, GO:0003677, GO:0004803, GO:0006313, GO:0003677, GO:0004803, GO:0006313
scaffold_30157_2	446469.Sked_03460	6.6e-45	186.8												S	PIN domain	Pfam, SUPERFAMILY	PF13470, SSF88723	PIN domain	IPR002716, IPR029060	PIN domain, PIN-like domain superfamily
scaffold_30208_1	1448389.BAVQ01000083_gene254	3.3e-77	294.7	rseP		ko:K11749	ko02024,ko04112,map02024,map04112				ko00000,ko00001,ko01000,ko01002				M	Peptidase M50	CDD, PANTHER, Gene3D, Pfam, SMART, SUPERFAMILY, PANTHER, ProSiteProfiles	cd00989, PTHR42837, G3DSA:2.30.42.10, PF13180, SM00228, SSF50156, PTHR42837:SF2, PS50106	PDZ_metalloprotease, PDZ domain, PDZ domain profile.	IPR001478, IPR001478, IPR036034, IPR001478	PDZ domain, PDZ domain, PDZ superfamily, PDZ domain	GO:0008150, GO:0040007GO:0005515, GO:0005515, GO:0005515, GO:0005515
scaffold_30291_1	1292020.H483_0116915	5.1e-60	237.3												E	GDSL-like Lipase/Acylhydrolase family	Gene3D, Pfam, SUPERFAMILY	G3DSA:3.40.50.1110, PF13472, SSF52266	GDSL-like Lipase/Acylhydrolase family	IPR036514, IPR013830	SGNH hydrolase superfamily, SGNH hydrolase-type esterase domain
scaffold_30347_1	1448389.BAVQ01000022_gene1629	1.7e-80	305.4	accA1	6.3.4.14,6.4.1.2,6.4.1.3,6.4.1.4	ko:K01968,ko:K11263	ko00061,ko00280,ko00620,ko00630,ko00640,ko01100,ko01110,ko01120,ko01130,ko01200,ko01212,map00061,map00280,map00620,map00630,map00640,map01100,map01110,map01120,map01130,map01200,map01212	M00036,M00082,M00741	R00742,R01859,R04138,R04385	RC00040,RC00097,RC00253,RC00367,RC00609,RC00942	ko00000,ko00001,ko00002,ko01000			iNJ661.Rv2501c	I	carboxylase	ProSiteProfiles, ProSiteProfiles, SUPERFAMILY, PANTHER, Pfam, Gene3D, Pfam, SUPERFAMILY, ProSitePatterns	PS50975, PS50979, SSF52440, PTHR18866, PF00289, G3DSA:3.30.470.130, PF02786, SSF56059, PS00866	ATP-grasp fold profile, Biotin carboxylation domain profile, Biotin carboxylase, N-terminal domain, Carbamoyl-phosphate synthase L chain, ATP binding domain, Carbamoyl-phosphate synthase subdomain signature 1.	IPR011761, IPR011764, IPR016185, IPR005481, IPR005479, IPR005479	ATP-grasp fold, Biotin carboxylation domain, Pre-ATP-grasp domain superfamily, Biotin carboxylase-like, N-terminal domain, Carbamoyl-phosphate synthetase large subunit-like, ATP-binding domain, Carbamoyl-phosphate synthetase large subunit-like, ATP-binding domain	GO:0005575, GO:0005623, GO:0005886, GO:0016020, GO:0044464, GO:0071944GO:0005524, GO:0046872, GO:0005524, GO:0005524	Reactome: R-HSA-196780, Reactome: R-HSA-3371599, Reactome: R-HSA-196780, Reactome: R-HSA-3371599,
scaffold_30361_1	1448389.BAVQ01000023_gene1447	1.6e-27	129.4														TMHMM, SignalP_GRAM_POSITIVE	TMhelix, SignalP-TM	Region of a membrane-bound protein predicted to be embedded in the membrane.
scaffold_30393_2	1122130.AUHN01000004_gene843	6.5e-47	193.4	secA_2											S	SEC-C motif	NA	NA	NA	NA	NA	na	NA
scaffold_30609_1	1448389.BAVQ01000071_gene2435	9.4e-77	293.1												M	Cell wall arabinan synthesis protein	Pfam, TMHMM, TMHMM, Gene3D, Pfam	PF17689, TMhelix, TMhelix, G3DSA:2.60.120.610, PF04602	Arabinosyltransferase concanavalin like domain, Region of a membrane-bound protein predicted to be embedded in the membrane, Region of a membrane-bound protein predicted to be embedded in the membrane, Mycobacterial cell wall arabinan synthesis protein	IPR040920, IPR027451, IPR007680	Arabinosyltransferas, concanavalin like domain, Arabinofuranosyltransferase, domain 1, Arabinofuranosyltransferase, central domain	GO:0052636, GO:0071766
scaffold_30660_2	446469.Sked_15470	2.9e-41	174.1	lpdA	1.8.1.4	ko:K00382	ko00010,ko00020,ko00260,ko00280,ko00620,ko00630,ko00640,ko01100,ko01110,ko01120,ko01130,ko01200,map00010,map00020,map00260,map00280,map00620,map00630,map00640,map01100,map01110,map01120,map01130,map01200	M00009,M00011,M00036,M00307,M00532	R00209,R01221,R01698,R03815,R07618,R08549	RC00004,RC00022,RC00583,RC02742,RC02833,RC02834	br01601,ko00000,ko00001,ko00002,ko01000,ko04147				C	Dehydrogenase	Gene3D, PRINTS, PRINTS, PANTHER, Pfam, PANTHER, SUPERFAMILY	G3DSA:3.30.390.30, PR00411, PR00411, PTHR22912, PF02852, PTHR22912:SF199, SSF55424	Pyridine nucleotide disulphide reductase class-I signature, Pyridine nucleotide disulphide reductase class-I signature, Pyridine nucleotide-disulphide oxidoreductase, dimerisation domain	IPR016156, IPR004099, IPR016156	FAD/NAD-linked reductase, dimerisation domain superfamily, Pyridine nucleotide-disulphide oxidoreductase, dimerisation domain, FAD/NAD-linked reductase, dimerisation domain superfamily	GO:0016491, GO:0050660, GO:0055114, GO:0045454, GO:0055114, GO:0016491, GO:0050660, GO:0055114
scaffold_30663_1	1448389.BAVQ01000002_gene2976	2.7e-26	124.4	recF		ko:K03629,ko:K07459	ko03440,map03440				ko00000,ko00001,ko03400				L	it is required for DNA replication and normal SOS inducibility. RecF binds preferentially to single-stranded, linear DNA. It also seems to bind ATP	Gene3D, ProSitePatterns	G3DSA:3.40.50.300, PS00618	RecF protein signature 2.	IPR018078	DNA-binding, RecF, conserved site	GO:0000731, GO:0003674, GO:0003676, GO:0003677, GO:0003697, GO:0005488, GO:0005575, GO:0005622, GO:0005623, GO:0005737, GO:0005829, GO:0005886, GO:0006139, GO:0006259, GO:0006260, GO:0006281, GO:0006302, GO:0006725, GO:0006807, GO:0006950, GO:0006974, GO:0007154, GO:0008150, GO:0008152, GO:0009058, GO:0009059, GO:0009314, GO:0009411, GO:0009416, GO:0009432, GO:0009605, GO:0009628, GO:0009987, GO:…
scaffold_30663_2	1448389.BAVQ01000002_gene2975	4.2e-39	167.2												S	Zn-ribbon-containing possibly RNA-binding protein and truncated derivatives	MobiDBLite, Pfam	mobidb-lite, PF05258	consensus disorder prediction, Dna[CI] antecedent, DciA	IPR007922	Protein of unknown function DUF721/UPF0232
scaffold_30689_1	1448389.BAVQ01000009_gene3795	8.7e-91	339.7	gcvP	1.4.4.2	ko:K00281,ko:K00282	ko00260,ko00630,ko01100,ko01110,ko01130,ko01200,map00260,map00630,map01100,map01110,map01130,map01200	M00532	R01221,R03425	RC00022,RC00929,RC02834,RC02880	ko00000,ko00001,ko00002,ko01000			iECIAI39_1322.ECIAI39_3318	E	The glycine cleavage system catalyzes the degradation of glycine. The P protein binds the alpha-amino group of glycine through its pyridoxal phosphate cofactor	Pfam, PANTHER, SUPERFAMILY, Gene3D	PF02347, PTHR11773, SSF53383, G3DSA:3.40.640.10	Glycine cleavage system P-protein	IPR020581, IPR020581, IPR015424, IPR015421	Glycine cleavage system P protein, Glycine cleavage system P protein, Pyridoxal phosphate-dependent transferase, Pyridoxal phosphate-dependent transferase, major domain	GO:0003674, GO:0003824, GO:0004375, GO:0005488, GO:0005515, GO:0005575, GO:0005622, GO:0005623, GO:0005737, GO:0005829, GO:0008150, GO:0008152, GO:0016491, GO:0016638, GO:0016642, GO:0042802, GO:0044424, GO:0044444, GO:0044464, GO:0055114GO:0004375, GO:0006546, GO:0055114, GO:0004375, GO:0006546, GO:0055114, GO:0003824	KEGG: 00260+1.4.4.2, Reactome: R-HSA-6783984, KEGG: 00260+1.4.4.2, Reactome: R-HSA-6783984,
scaffold_30767_1	1448389.BAVQ01000002_gene2998	3.2e-76	291.2												GM	PFAM NAD-dependent epimerase dehydratase	Gene3D, MobiDBLite, SUPERFAMILY	G3DSA:3.40.50.720, mobidb-lite, SSF51735	consensus disorder prediction	IPR036291	NAD(P)-binding domain superfamily
scaffold_30768_1	1193181.BN10_1240012	1.6e-07	63.2														SignalP_GRAM_POSITIVE, TMHMM, SignalP_EUK	SignalP-TM, TMhelix, SignalP-noTM	Region of a membrane-bound protein predicted to be embedded in the membrane.
scaffold_30803_1	1095772.CAHH01000024_gene2029	1.3e-56	226.1	ssb		ko:K03111	ko03030,ko03430,ko03440,map03030,map03430,map03440				ko00000,ko00001,ko03029,ko03032,ko03400				L	single-stranded DNA-binding protein	Hamap, TIGRFAM, Pfam, PANTHER, SUPERFAMILY, MobiDBLite, CDD, PANTHER, Gene3D, ProSiteProfiles	MF_00984, TIGR00621, PF00436, PTHR10302, SSF50249, mobidb-lite, cd04496, PTHR10302:SF10, G3DSA:2.40.50.140, PS50935	Single-stranded DNA-binding protein, ssb: single-stranded DNA-binding protein, Single-strand binding protein family, consensus disorder prediction, SSB_OBF, Single-strand binding (SSB) domain profile.	IPR011344, IPR011344, IPR000424, IPR011344, IPR012340, IPR000424, IPR000424	Single-stranded DNA-binding protein, Single-stranded DNA-binding protein, Primosome PriB/single-strand DNA-binding, Single-stranded DNA-binding protein, Nucleic acid-binding, OB-fold, Primosome PriB/single-strand DNA-binding, Primosome PriB/single-strand DNA-binding	GO:0003674, GO:0003676, GO:0003677, GO:0003697, GO:0005488, GO:0005575, GO:0005576, GO:0005623, GO:0005886, GO:0006950, GO:0006974, GO:0008150, GO:0009987, GO:0016020, GO:0033554, GO:0042221, GO:0044464, GO:0046677, GO:0050896, GO:0051716, GO:0071944, GO:0097159, GO:1901363GO:0003697, GO:0006260, GO:0003697, GO:0006260, GO:0003697, GO:0003697, GO:0006260, GO:0003697, GO:0003697	Reactome: R-HSA-2151201, Reactome: R-HSA-2151201, Reactome: R-HSA-2151201, Reactome: R-HSA-2151201, Reactome: R-HSA-2151201, Reactome: R-HSA-2151201
scaffold_30867_1	1448389.BAVQ01000080_gene487	3.1e-96	357.8	hisS	6.1.1.21	ko:K01892	ko00970,map00970	M00359,M00360	R03655	RC00055,RC00523	ko00000,ko00001,ko00002,ko01000,ko01007,ko03016			iE2348C_1286.E2348C_2797,iECNA114_1301.ECNA114_2592,iECSF_1327.ECSF_2358	J	histidyl-tRNA synthetase	SUPERFAMILY, Pfam, PANTHER, Gene3D, PANTHER	SSF55681, PF13393, PTHR43707:SF4, G3DSA:3.30.930.10, PTHR43707	Histidyl-tRNA synthetase	IPR041715, IPR004516	Class II Histidinyl-tRNA synthetase (HisRS)-like catalytic core domain, Histidine-tRNA ligase/ATP phosphoribosyltransferase regulatory subunit	GO:0003674, GO:0003824, GO:0004812, GO:0004821, GO:0005575, GO:0005618, GO:0005622, GO:0005623, GO:0005737, GO:0005829, GO:0005886, GO:0006082, GO:0006139, GO:0006399, GO:0006412, GO:0006418, GO:0006427, GO:0006518, GO:0006520, GO:0006725, GO:0006807, GO:0008150, GO:0008152, GO:0009058, GO:0009059, GO:0009987, GO:0010467, GO:0016020, GO:0016070, GO:0016874, GO:0016875, GO:0019538, GO:0019752, GO:…
scaffold_30956_1	1448389.BAVQ01000003_gene3510	3.2e-98	364.4	pepA	3.4.11.1	ko:K01255	ko00480,ko01100,map00480,map01100		R00899,R04951	RC00096,RC00141	ko00000,ko00001,ko01000,ko01002				E	Presumably involved in the processing and regular turnover of intracellular proteins. Catalyzes the removal of unsubstituted N-terminal amino acids from various peptides	Pfam, PANTHER, SUPERFAMILY, PANTHER, ProSitePatterns, Gene3D, PRINTS, PRINTS, PRINTS	PF00883, PTHR11963, SSF53187, PTHR11963:SF23, PS00631, G3DSA:3.40.630.10, PR00481, PR00481, PR00481	Cytosol aminopeptidase family, catalytic domain, Cytosol aminopeptidase signature, Cytosol aminopeptidase signature, Cytosol aminopeptidase signature, Cytosol aminopeptidase signature	IPR000819, IPR011356, IPR000819, IPR011356, IPR011356, IPR011356	Peptidase M17, leucyl aminopeptidase, C-terminal, Peptidase M17, leucine aminopeptidase/peptidase B, Peptidase M17, leucyl aminopeptidase, C-terminal, Peptidase M17, leucine aminopeptidase/peptidase B, Peptidase M17, leucine aminopeptidase/peptidase B, Peptidase M17, leucine aminopeptidase/peptidase B	GO:0005575, GO:0005618, GO:0005623, GO:0005886, GO:0016020, GO:0030312, GO:0044464, GO:0071944GO:0004177, GO:0006508, GO:0004177, GO:0005737, GO:0008235, GO:0019538, GO:0030145, GO:0004177, GO:0006508, GO:0004177, GO:0005737, GO:0008235, GO:0019538, GO:0030145, GO:0004177, GO:0005737, GO:0008235, GO:0019538, GO:0030145, GO:0004177, GO:0005737, GO:0008235, GO:0019538, GO:0030145	KEGG: 00480+3.4.11.1, KEGG: 00480+3.4.11.1, KEGG: 00480+3.4.11.1, KEGG: 00480+3.4.11.1, KEGG: 00480+3.4.11.1, KEGG: 00480+3.4.11.1
scaffold_30968_1	1077144.AGFF01000016_gene2775	5.6e-66	256.9	fadD3	6.2.1.3	ko:K01897	ko00061,ko00071,ko01100,ko01212,ko02024,ko03320,ko04146,ko04216,ko04714,ko04920,map00061,map00071,map01100,map01212,map02024,map03320,map04146,map04216,map04714,map04920	M00086	R01280	RC00004,RC00014	ko00000,ko00001,ko00002,ko01000,ko01004,ko04147	4.C.1.1			IQ	PFAM AMP-dependent synthetase and ligase	SUPERFAMILY, CDD, Pfam, PANTHER, Gene3D, Gene3D, Pfam	SSF56801, cd05936, PF13193, PTHR43767, G3DSA:3.40.50.12780, G3DSA:3.30.300.30, PF00501	FC-FACS_FadD_like, AMP-binding enzyme C-terminal domain, AMP-binding enzyme	IPR025110, IPR042099, IPR000873	AMP-binding enzyme, C-terminal domain, AMP-dependent synthetase-like superfamily, AMP-dependent synthetase/ligase	GO:0003824
scaffold_31049_1	1448389.BAVQ01000071_gene2458	7.8e-46	189.9												S	Septum formation	Pfam	PF13845	Septum formation	IPR026004	Septum formation-related domain	GO:0005575, GO:0005576, GO:0005618, GO:0005623, GO:0005886, GO:0016020, GO:0030312, GO:0044464, GO:0071944
scaffold_31101_1	1448389.BAVQ01000070_gene2269	5.4e-37	160.2			ko:K08372	ko02020,map02020				ko00000,ko00001,ko01000,ko01002				O	serine protease	SUPERFAMILY, ProSiteProfiles, SMART, Pfam, CDD, Gene3D	SSF50156, PS50106, SM00228, PF13180, cd00987, G3DSA:2.30.42.10	PDZ domain profile, PDZ domain, PDZ_serine_protease	IPR036034, IPR001478, IPR001478, IPR001478	PDZ superfamily, PDZ domain, PDZ domain, PDZ domain	GO:0005515, GO:0005515, GO:0005515, GO:0005515
scaffold_31187_1	1463936.JOJI01000043_gene7976	5.1e-43	181	recT		ko:K07455					ko00000,ko03400				L	RecT family	Pfam, TIGRFAM	PF03837, TIGR00616	RecT family, rect: recombinase, phage RecT family	IPR018330, IPR004590	RecT family, DNA single-strand annealing protein RecT	GO:0000724, GO:0000725, GO:0000731, GO:0003674, GO:0003676, GO:0003677, GO:0003697, GO:0005488, GO:0005575, GO:0006139, GO:0006259, GO:0006281, GO:0006302, GO:0006310, GO:0006725, GO:0006807, GO:0006950, GO:0006974, GO:0006996, GO:0008150, GO:0008152, GO:0009058, GO:0009059, GO:0009987, GO:0016043, GO:0018130, GO:0019438, GO:0032392, GO:0032508, GO:0032991, GO:0032993, GO:0033554, GO:0034641, GO:…
scaffold_31351_1	1448389.BAVQ01000080_gene365	1.6e-84	318.9												IQ	Dehydrogenases with different specificities (Related to short-chain alcohol dehydrogenases)	PANTHER, SUPERFAMILY, PANTHER	PTHR43544, SSF51735, PTHR43544:SF2		IPR036291	NAD(P)-binding domain superfamily
scaffold_31481_1	1448389.BAVQ01000003_gene3612	7.1e-61	240.4	cbiX	4.99.1.3	ko:K03795	ko00860,ko01100,ko01120,map00860,map01100,map01120		R05807	RC01012	ko00000,ko00001,ko01000				P	cobalamin (vitamin B12) biosynthesis CbiX protein	CDD, SUPERFAMILY, Pfam, Gene3D, PANTHER	cd03416, SSF53800, PF01903, G3DSA:3.40.50.1400, PTHR33542	CbiX_SirB_N, CbiX	IPR002762	Cobalamin (vitamin B12) biosynthesis CbiX	GO:0009236, GO:0016852	KEGG: 00860+4.99.1.3, MetaCyc: PWY-7377,
scaffold_31739_1	1448389.BAVQ01000016_gene4113	2.5e-98	364.8	purB	4.3.2.2	ko:K01756	ko00230,ko00250,ko01100,ko01110,ko01130,map00230,map00250,map01100,map01110,map01130	M00048,M00049	R01083,R04559	RC00379,RC00444,RC00445	ko00000,ko00001,ko00002,ko01000				F	Belongs to the lyase 1 family. Adenylosuccinate lyase subfamily	Pfam, SUPERFAMILY, Gene3D, Gene3D, ProSitePatterns, PANTHER	PF00206, SSF48557, G3DSA:1.20.200.10, G3DSA:1.20.200.10, PS00163, PTHR43172	Lyase, Fumarate lyases signature.	IPR022761, IPR008948, IPR020557	Fumarate lyase, N-terminal, L-Aspartase-like, Fumarate lyase, conserved site	GO:0003824, GO:0003824
scaffold_31887_1	1448389.BAVQ01000084_gene50	1.1e-16	91.7	hrpA	3.6.4.13	ko:K03578					ko00000,ko01000				L	ATP-dependent helicase	Pfam	PF11898	Domain of unknown function (DUF3418)	IPR024590	RNA helicase HrpA, C-terminal	GO:0003674, GO:0003724, GO:0003824, GO:0004004, GO:0004386, GO:0006139, GO:0006396, GO:0006397, GO:0006725, GO:0006807, GO:0008026, GO:0008150, GO:0008152, GO:0008186, GO:0009451, GO:0009987, GO:0010467, GO:0016070, GO:0016071, GO:0016462, GO:0016787, GO:0016817, GO:0016818, GO:0016887, GO:0017111, GO:0034641, GO:0042623, GO:0043170, GO:0043412, GO:0044237, GO:0044238, GO:0046483, GO:0070035, GO:…
scaffold_31887_2	1448389.BAVQ01000084_gene48	2e-42	178.3	nrdR		ko:K07738					ko00000,ko03000				K	Negatively regulates transcription of bacterial ribonucleotide reductase nrd genes and operons by binding to NrdR- boxes	Hamap, Pfam, PANTHER, ProSiteProfiles	MF_00440, PF03477, PTHR30455, PS51161	Transcriptional repressor NrdR [nrdR], ATP cone domain, ATP-cone domain profile.	IPR003796, IPR005144, IPR003796, IPR005144	Ribonucleotide reductase regulator NrdR-like, ATP-cone domain, Ribonucleotide reductase regulator NrdR-like, ATP-cone domain	GO:0000166, GO:0003674, GO:0003676, GO:0003677, GO:0003690, GO:0005488, GO:0005524, GO:0005575, GO:0005622, GO:0005623, GO:0005737, GO:0005829, GO:0006355, GO:0008144, GO:0008150, GO:0009889, GO:0009890, GO:0009892, GO:0010468, GO:0010556, GO:0010558, GO:0010605, GO:0010629, GO:0017076, GO:0019219, GO:0019222, GO:0030554, GO:0031323, GO:0031324, GO:0031326, GO:0031327, GO:0032553, GO:0032555, GO:…	Reactome: R-HSA-499943, Reactome: R-HSA-499943
scaffold_32023_1	1448389.BAVQ01000036_gene947	1.5e-55	222.6												K	Transcriptional regulator	TMHMM	TMhelix	Region of a membrane-bound protein predicted to be embedded in the membrane.
scaffold_32051_1	1077144.AGFF01000010_gene2659	9e-81	306.2	ybdL	2.6.1.17,2.6.1.88	ko:K14267,ko:K14287	ko00300,ko01100,ko01120,ko01230,map00300,map01100,map01120,map01230	M00016	R04475,R08618	RC00006,RC00025	ko00000,ko00001,ko00002,ko01000,ko01007			iNJ661.Rv0858c	E	Aminotransferase	CDD, PANTHER, Pfam, Gene3D, SUPERFAMILY, PANTHER, Gene3D	cd00609, PTHR43807, PF00155, G3DSA:3.40.640.10, SSF53383, PTHR43807:SF20, G3DSA:3.90.1150.10	AAT_like, Aminotransferase class I and II	IPR004839, IPR015421, IPR015424, IPR015422	Aminotransferase, class I/classII, Pyridoxal phosphate-dependent transferase, major domain, Pyridoxal phosphate-dependent transferase, Pyridoxal phosphate-dependent transferase domain 1	GO:0003674, GO:0003824, GO:0005488, GO:0005575, GO:0005618, GO:0005623, GO:0008144, GO:0008483, GO:0010326, GO:0016740, GO:0016769, GO:0019842, GO:0030170, GO:0030312, GO:0036094, GO:0043167, GO:0043168, GO:0044464, GO:0048037, GO:0050662, GO:0070279, GO:0071944, GO:0097159, GO:1901363GO:0009058, GO:0030170, GO:0003824, GO:0003824
scaffold_32061_1	321955.AAGP01000036_gene3419	3.3e-07	60.5		1.6.5.5	ko:K00344					ko00000,ko01000				C	Zinc-binding dehydrogenase	SignalP_EUK, Gene3D	SignalP-noTM, G3DSA:3.40.50.720
scaffold_32061_2	1123065.ATWL01000025_gene1866	9.4e-23	113.2		1.6.5.5	ko:K00344					ko00000,ko01000				C	Zinc-binding dehydrogenase	PANTHER, Gene3D, PANTHER, SUPERFAMILY, Gene3D	PTHR43677:SF6, G3DSA:3.40.50.720, PTHR43677, SSF51735, G3DSA:3.90.180.10		IPR036291	NAD(P)-binding domain superfamily
scaffold_32126_1	1448389.BAVQ01000016_gene4055	5.7e-87	327	clpC		ko:K03696	ko01100,map01100				ko00000,ko03110				O	Part of a stress-induced multi-chaperone system, it is involved in the recovery of the cell from heat-induced damage, in cooperation with DnaK, DnaJ and GrpE	Pfam, PRINTS, PRINTS, PRINTS, PANTHER, ProSitePatterns, SUPERFAMILY, Gene3D, CDD	PF07724, PR00300, PR00300, PR00300, PTHR11638, PS00871, SSF52540, G3DSA:3.40.50.300, cd00009	AAA domain (Cdc48 subfamily), ATP-dependent Clp protease ATP-binding subunit signature, ATP-dependent Clp protease ATP-binding subunit signature, ATP-dependent Clp protease ATP-binding subunit signature, Chaperonins clpA/B signature 2, AAA	IPR003959, IPR001270, IPR001270, IPR001270, IPR028299, IPR027417	ATPase, AAA-type, core, ClpA/B family, ClpA/B family, ClpA/B family, ClpA/B, conserved site 2, P-loop containing nucleoside triphosphate hydrolase	GO:0005524, GO:0005524, GO:0005524, GO:0005524
scaffold_32188_1	1448389.BAVQ01000001_gene2827	4.1e-77	294.3	tyrA	1.3.1.12,1.3.1.43	ko:K00210,ko:K00220,ko:K04517	ko00400,ko00401,ko01100,ko01110,ko01130,ko01230,map00400,map00401,map01100,map01110,map01130,map01230	M00025,M00040	R00732,R01728	RC00125	ko00000,ko00001,ko00002,ko01000				E	Prephenate dehydrogenase	ProSiteProfiles, Gene3D, PANTHER, Pfam, Gene3D, SUPERFAMILY, SUPERFAMILY, PANTHER	PS51176, G3DSA:1.10.3660.10, PTHR21363:SF0, PF02153, G3DSA:3.40.50.720, SSF51735, SSF48179, PTHR21363	Prephenate/arogenate dehydrogenase domain profile, Prephenate dehydrogenase	IPR003099, IPR003099, IPR036291, IPR008927	Prephenate dehydrogenase, Prephenate dehydrogenase, NAD(P)-binding domain superfamily, 6-phosphogluconate dehydrogenase-like, C-terminal domain superfamily	GO:0000166, GO:0003674, GO:0003824, GO:0005488, GO:0006082, GO:0006520, GO:0006570, GO:0006571, GO:0006725, GO:0006807, GO:0008150, GO:0008152, GO:0008652, GO:0008977, GO:0009058, GO:0009072, GO:0009073, GO:0009095, GO:0009987, GO:0016053, GO:0016491, GO:0016627, GO:0016628, GO:0019438, GO:0019752, GO:0036094, GO:0043167, GO:0043168, GO:0043436, GO:0044237, GO:0044238, GO:0044249, GO:0044281, GO:…
scaffold_32199_1	1448389.BAVQ01000088_gene1174	2.1e-97	361.7		3.5.1.24	ko:K01442	ko00120,ko00121,ko01100,map00120,map00121,map01100		R02797,R03975,R03977,R04486,R04487,R05835	RC00090,RC00096	ko00000,ko00001,ko01000				M	Choloylglycine hydrolase	Gene3D, Pfam, SUPERFAMILY, PANTHER	G3DSA:3.60.60.10, PF02275, SSF56235, PTHR35527	Linear amide C-N hydrolases, choloylglycine hydrolase family	IPR029132, IPR029055	Choloylglycine hydrolase/NAAA C-terminal, Nucleophile aminohydrolases, N-terminal
scaffold_32204_2	1077144.AGFF01000018_gene1547	1e-16	92														NA	NA	NA	NA	NA	na	NA
scaffold_32232_1	936548.HMPREF1136_0812	2.6e-31	141.4												S	EcsC protein family	NA	NA	NA	NA	NA	na	NA
scaffold_32363_1	471853.Bcav_0592	2.2e-34	152.1	nagA	3.5.1.25	ko:K01443	ko00520,ko01130,map00520,map01130		R02059	RC00166,RC00300	ko00000,ko00001,ko01000				G	Belongs to the metallo-dependent hydrolases superfamily. NagA family	Pfam, PANTHER, PANTHER, SUPERFAMILY, Gene3D, SUPERFAMILY	PF07969, PTHR11113, PTHR11113:SF1, SSF51556, G3DSA:3.20.20.140, SSF51338	Amidohydrolase family	IPR013108, IPR003764, IPR032466, IPR011059	Amidohydrolase 3, N-acetylglucosamine-6-phosphate deacetylase, Metal-dependent hydrolase, Metal-dependent hydrolase, composite domain superfamily	GO:0006044, GO:0008448, GO:0016810	KEGG: 00052+3.5.1.25, KEGG: 00520+3.5.1.25, MetaCyc: PWY-6906, MetaCyc: PWY-7077, MetaCyc: PWY-7395, Reactome: R-HSA-446210,
scaffold_32452_1	1448389.BAVQ01000023_gene1352	3.3e-29	134.4												S	SEC-C motif	MobiDBLite	mobidb-lite	consensus disorder prediction
scaffold_32502_1	888439.HMPREF9240_01048	2.2e-38	165.6												S	Terminase	Gene3D	G3DSA:3.40.50.300
scaffold_32563_2	1448389.BAVQ01000037_gene2053	4e-10	69.3	MA20_22130		ko:K07077					ko00000				S	Dehydrogenase	PANTHER	PTHR43260		IPR014614	Uncharacterised conserved protein UCP036654	GO:0016627, GO:0055114
scaffold_32573_1	1448389.BAVQ01000044_gene1729	2.5e-79	301.6												IQ	Belongs to the short-chain dehydrogenases reductases (SDR) family	ProSitePatterns, SUPERFAMILY, PANTHER, PANTHER, PRINTS, PRINTS, PRINTS, Gene3D, Pfam, PRINTS, PRINTS, PRINTS, PRINTS	PS00061, SSF51735, PTHR42760, PTHR42760:SF52, PR00080, PR00080, PR00080, G3DSA:3.40.50.720, PF00106, PR00081, PR00081, PR00081, PR00081	Short-chain dehydrogenases/reductases family signature, Short-chain dehydrogenase/reductase (SDR) superfamily signature, Short-chain dehydrogenase/reductase (SDR) superfamily signature, Short-chain dehydrogenase/reductase (SDR) superfamily signature, short chain dehydrogenase, Glucose/ribitol dehydrogenase family signature, Glucose/ribitol dehydrogenase family signature, Glucose/ribitol dehydroge…	IPR020904, IPR036291, IPR002347, IPR002347, IPR002347, IPR002347, IPR002347, IPR002347, IPR002347, IPR002347	Short-chain dehydrogenase/reductase, conserved site, NAD(P)-binding domain superfamily, Short-chain dehydrogenase/reductase SDR, Short-chain dehydrogenase/reductase SDR, Short-chain dehydrogenase/reductase SDR, Short-chain dehydrogenase/reductase SDR, Short-chain dehydrogenase/reductase SDR, Short-chain dehydrogenase/reductase SDR, Short-chain dehydrogenase/reductase SDR, Short-chain dehydrogenas…	GO:0016491
scaffold_32581_1	1448389.BAVQ01000072_gene2755	1.3e-12	77.8	tsaD	2.3.1.234	ko:K01409,ko:K03070	ko02024,ko03060,ko03070,map02024,map03060,map03070	M00335	R10648	RC00070,RC00416	ko00000,ko00001,ko00002,ko01000,ko02044,ko03016	3.A.5.1,3.A.5.10,3.A.5.2,3.A.5.4			O	Required for the formation of a threonylcarbamoyl group on adenosine at position 37 (t(6)A37) in tRNAs that read codons beginning with adenine. Is involved in the transfer of the threonylcarbamoyl moiety of threonylcarbamoyl-AMP (TC-AMP) to the N6 group of A37, together with TsaE and TsaB. TsaD likely plays a direct catalytic role in this reaction	Gene3D	G3DSA:3.30.420.40				GO:0000287, GO:0000408, GO:0002949, GO:0003674, GO:0003824, GO:0004175, GO:0004222, GO:0005488, GO:0005506, GO:0005515, GO:0005575, GO:0005622, GO:0005623, GO:0005737, GO:0005829, GO:0006139, GO:0006396, GO:0006399, GO:0006400, GO:0006508, GO:0006725, GO:0006807, GO:0008033, GO:0008150, GO:0008152, GO:0008233, GO:0008237, GO:0009451, GO:0009987, GO:0010467, GO:0016070, GO:0016787, GO:0019538, GO:…
scaffold_32581_2	1448389.BAVQ01000072_gene2754	1.3e-43	182.6	rimI	2.3.1.128,2.3.1.234	ko:K01409,ko:K03789,ko:K14742			R10648	RC00070,RC00416	ko00000,ko01000,ko03009,ko03016				K	This enzyme acetylates the N-terminal alanine of ribosomal protein S18	ProSiteProfiles, PANTHER, Gene3D, Pfam, PANTHER, CDD, TIGRFAM, SUPERFAMILY	PS51186, PTHR43420, G3DSA:3.40.630.30, PF00583, PTHR43420:SF16, cd04301, TIGR01575, SSF55729	Gcn5-related N-acetyltransferase (GNAT) domain profile, Acetyltransferase (GNAT) family, NAT_SF, rimI: ribosomal-protein-alanine acetyltransferase	IPR000182, IPR000182, IPR006464, IPR016181	GNAT domain, GNAT domain, N-acetyltransferase RimI/Ard1, Acyl-CoA N-acyltransferase	GO:0003674, GO:0003824, GO:0004596, GO:0005575, GO:0005622, GO:0005623, GO:0005737, GO:0006464, GO:0006473, GO:0006474, GO:0006807, GO:0008080, GO:0008150, GO:0008152, GO:0008999, GO:0009987, GO:0010467, GO:0016407, GO:0016410, GO:0016740, GO:0016746, GO:0016747, GO:0017189, GO:0018193, GO:0018194, GO:0019538, GO:0031365, GO:0034212, GO:0036211, GO:0043170, GO:0043412, GO:0043543, GO:0044237, GO:…
scaffold_32593_1	1448389.BAVQ01000023_gene1393	5.7e-47	194.1	iphP	3.1.3.48	ko:K01104					ko00000,ko01000				T	Protein tyrosine serine phosphatase	Pfam, CDD, SUPERFAMILY, Gene3D, PANTHER, PANTHER	PF13350, cd14529, SSF52799, G3DSA:3.90.190.10, PTHR31126, PTHR31126:SF1	Tyrosine phosphatase family, TpbA-like	IPR026893, IPR029021, IPR029021	Tyrosine/serine-protein phosphatase IphP-type, Protein-tyrosine phosphatase-like, Protein-tyrosine phosphatase-like
scaffold_32610_1	714083.JH370377_gene1318	1.8e-21	109.4		3.2.1.4,3.2.1.78	ko:K01179,ko:K01218	ko00051,ko00500,ko01100,ko02024,map00051,map00500,map01100,map02024		R01332,R06200,R11307,R11308	RC00467	ko00000,ko00001,ko01000		GH26,GH5,GH9		S	Fibronectin type 3 domain	NA	NA	NA	NA	NA	GO:0003674, GO:0005488, GO:0005515, GO:0042802na	NA
scaffold_32641_1	1448389.BAVQ01000043_gene1774	9e-69	266.5	fas	2.3.1.179	ko:K09458,ko:K11533	ko00061,ko00780,ko01100,ko01212,ko04931,map00061,map00780,map01100,map01212,map04931	M00082,M00083,M00572	R01624,R01626,R04355,R04428,R04429,R04533,R04534,R04535,R04536,R04537,R04543,R04544,R04566,R04568,R04724,R04726,R04952,R04953,R04954,R04955,R04957,R04958,R04960,R04961,R04963,R04964,R04965,R04966,R04968,R04969,R07762,R07763,R07764,R07765,R10115,R10119,R10700	RC00004,RC00029,RC00039,RC00052,RC00076,RC00117,RC00831,RC01095,RC02727,RC02728,RC02729,RC02857,RC02888	ko00000,ko00001,ko00002,ko01000,ko01004				I	capsule polysaccharide biosynthetic process	Pfam	PF18094	DNA polymerase beta N-terminal domain
scaffold_32652_1	1448389.BAVQ01000090_gene2097	3.1e-77	294.7	phoA	3.1.3.1,3.1.3.39	ko:K01077,ko:K04342	ko00521,ko00730,ko00790,ko01100,ko01130,ko02020,map00521,map00730,map00790,map01100,map01130,map02020	M00126	R02135,R02228,R04620	RC00017,RC00078	ko00000,ko00001,ko00002,ko00537,ko01000,ko04147			iECO111_1330.ECO111_0413,iECO26_1355.ECO26_0416	P	Belongs to the alkaline phosphatase family	Pfam, Gene3D, ProSitePatterns, PRINTS, PRINTS, PRINTS, SUPERFAMILY, PANTHER, PANTHER	PF00245, G3DSA:3.40.720.10, PS00123, PR00113, PR00113, PR00113, SSF53649, PTHR11596, PTHR11596:SF5	Alkaline phosphatase, Alkaline phosphatase active site, Alkaline phosphatase signature, Alkaline phosphatase signature, Alkaline phosphatase signature	IPR001952, IPR017850, IPR018299, IPR001952, IPR001952, IPR001952, IPR017850, IPR001952	Alkaline phosphatase, Alkaline-phosphatase-like, core domain superfamily, Alkaline phosphatase, active site, Alkaline phosphatase, Alkaline phosphatase, Alkaline phosphatase, Alkaline-phosphatase-like, core domain superfamily, Alkaline phosphatase	GO:0000287, GO:0003674, GO:0003824, GO:0004035, GO:0004721, GO:0005488, GO:0005575, GO:0005623, GO:0006464, GO:0006470, GO:0006793, GO:0006796, GO:0006807, GO:0008150, GO:0008152, GO:0008270, GO:0009987, GO:0016311, GO:0016491, GO:0016695, GO:0016787, GO:0016788, GO:0016791, GO:0019538, GO:0030288, GO:0030313, GO:0030613, GO:0031975, GO:0033748, GO:0036211, GO:0042578, GO:0042597, GO:0043167, GO:…	KEGG: 00730+3.1.3.1, KEGG: 00790+3.1.3.1, MetaCyc: PWY-5083, MetaCyc: PWY-5491, KEGG: 00730+3.1.3.1, KEGG: 00790+3.1.3.1, MetaCyc: PWY-5083, MetaCyc: PWY-5491, KEGG: 00730+3.1.3.1, KEGG: 00790+3.1.3.1, MetaCyc: PWY-5083, MetaCyc: PWY-5491, KEGG: 00730+3.1.3.1, KEGG: 00790+3.1.3.1, MetaCyc: PWY-5083, MetaCyc: PWY-5491, KEGG: 00730+3.1.3.1, KEGG: 00790+3.1.3.1, MetaCyc: PWY-5083, MetaCyc: PWY-5491,…
scaffold_32667_1	1121362.A605_05490	1.3e-64	252.7		1.2.1.16,1.2.1.20,1.2.1.39,1.2.1.79	ko:K00135,ko:K00146	ko00250,ko00310,ko00350,ko00360,ko00643,ko00650,ko00760,ko01100,ko01120,map00250,map00310,map00350,map00360,map00643,map00650,map00760,map01100,map01120	M00027	R00713,R00714,R02401,R02536	RC00080	ko00000,ko00001,ko00002,ko01000				C	Aldehyde dehydrogenase	Pfam, SUPERFAMILY, Gene3D, PANTHER, PANTHER, Gene3D, MobiDBLite	PF00171, SSF53720, G3DSA:3.40.605.10, PTHR43353:SF12, PTHR43353, G3DSA:3.40.309.10, mobidb-lite	Aldehyde dehydrogenase family, consensus disorder prediction	IPR015590, IPR016161, IPR016162, IPR016163	Aldehyde dehydrogenase domain, Aldehyde/histidinol dehydrogenase, Aldehyde dehydrogenase, N-terminal, Aldehyde dehydrogenase, C-terminal	GO:0016491, GO:0055114, GO:0016491, GO:0055114, GO:0016491, GO:0055114, GO:0016491, GO:0016620, GO:0055114
scaffold_32685_1	1077144.AGFF01000031_gene2814	8.7e-58	229.9	nia	1.8.3.1	ko:K00387	ko00920,ko01100,ko01120,map00920,map01100,map01120		R00533	RC00168	ko00000,ko00001,ko01000				M	Oxidoreductase molybdopterin binding	TMHMM, TMHMM, TMHMM, TMHMM	TMhelix, TMhelix, TMhelix, TMhelix	Region of a membrane-bound protein predicted to be embedded in the membrane, Region of a membrane-bound protein predicted to be embedded in the membrane, Region of a membrane-bound protein predicted to be embedded in the membrane, Region of a membrane-bound protein predicted to be embedded in the membrane.
scaffold_32724_1	1448389.BAVQ01000006_gene3230	6.2e-62	243.8												BQ	Histone deacetylase domain	Gene3D, PANTHER, Pfam, MobiDBLite, PANTHER, SUPERFAMILY	G3DSA:3.40.800.20, PTHR43497, PF00850, mobidb-lite, PTHR43497:SF4, SSF52768	Histone deacetylase domain, consensus disorder prediction	IPR037138, IPR023801, IPR023696	Histone deacetylase domain superfamily, Histone deacetylase domain, Ureohydrolase domain superfamily		Reactome: R-HSA-2122947, Reactome: R-HSA-2644606, Reactome: R-HSA-2894862, Reactome: R-HSA-350054, Reactome: R-HSA-2122947, Reactome: R-HSA-2644606, Reactome: R-HSA-2894862, Reactome: R-HSA-350054,
scaffold_32834_1	649743.HMPREF0972_01518	1.5e-79	302.4	fixC		ko:K00313					ko00000,ko01000				C	FAD dependent oxidoreductase	PANTHER, SUPERFAMILY, Gene3D	PTHR43624, SSF51905, G3DSA:3.50.50.60		IPR039651, IPR036188, IPR036188	Protein FixC-like, FAD/NAD(P)-binding domain superfamily, FAD/NAD(P)-binding domain superfamily
scaffold_32900_1	1448389.BAVQ01000090_gene2079	8.6e-59	233		4.3.3.2	ko:K01757	ko00901,ko01100,ko01110,map00901,map01100,map01110		R03738	RC01072,RC01568	ko00000,ko00001,ko01000				G	Strictosidine synthase	MobiDBLite, Gene3D, MobiDBLite, PANTHER, SUPERFAMILY	mobidb-lite, G3DSA:2.120.10.30, mobidb-lite, PTHR10426, SSF63829	consensus disorder prediction, consensus disorder prediction	IPR011042	Six-bladed beta-propeller, TolB-like
scaffold_32924_1	1193181.BN10_970005	1.1e-41	176.4	mcrB		ko:K07448,ko:K07452					ko00000,ko01000,ko02048				L	restriction endonuclease	Pfam, PANTHER, SUPERFAMILY	PF04471, PTHR30015, SSF52980	Restriction endonuclease	IPR007560, IPR011335	Restriction endonuclease type IV, Mrr, Restriction endonuclease type II-like	GO:0003677, GO:0004519, GO:0009307	Reactome: R-HSA-6783310
scaffold_32953_1	645465.ACUR01000578_gene1354	7.2e-26	124												CH	COG0654 2-polyprenyl-6-methoxyphenol hydroxylase and related FAD-dependent oxidoreductases	PANTHER, SUPERFAMILY, PANTHER, Pfam, Gene3D	PTHR13789, SSF51905, PTHR13789:SF309, PF01494, G3DSA:3.50.50.60	FAD binding domain	IPR036188, IPR002938, IPR036188	FAD/NAD(P)-binding domain superfamily, FAD-binding domain, FAD/NAD(P)-binding domain superfamily	GO:0071949
scaffold_32972_1	1448389.BAVQ01000012_gene3920	1.4e-66	259.2	mrcB	2.4.1.129,3.4.16.4	ko:K05365,ko:K05366	ko00550,ko01100,ko01501,map00550,map01100,map01501		R04519	RC00005,RC00049	ko00000,ko00001,ko01000,ko01003,ko01011		GT51		M	penicillin-binding protein	MobiDBLite, Pfam, TMHMM, PANTHER, Gene3D, PANTHER, Gene3D, SUPERFAMILY	mobidb-lite, PF00912, TMhelix, PTHR32282, G3DSA:3.90.1310.20, PTHR32282:SF8, G3DSA:1.10.3810.10, SSF53955	consensus disorder prediction, Transglycosylase, Region of a membrane-bound protein predicted to be embedded in the membrane.	IPR001264, IPR036950, IPR023346	Glycosyl transferase, family 51, Penicillin binding protein transglycosylase domain, Lysozyme-like domain superfamily	GO:0001666, GO:0003674, GO:0005488, GO:0005575, GO:0005623, GO:0006950, GO:0008144, GO:0008150, GO:0008658, GO:0009628, GO:0009987, GO:0030288, GO:0030313, GO:0031406, GO:0031975, GO:0033218, GO:0033293, GO:0033554, GO:0036094, GO:0036293, GO:0036294, GO:0042221, GO:0042597, GO:0043167, GO:0043168, GO:0043177, GO:0044464, GO:0050896, GO:0051716, GO:0070482, GO:0070887, GO:0071453, GO:0071456, GO:…	KEGG: 00550+2.4.1.129, MetaCyc: PWY-5265, MetaCyc: PWY-6385, MetaCyc: PWY-6470, MetaCyc: PWY-6471, KEGG: 00550+2.4.1.129, MetaCyc: PWY-5265, MetaCyc: PWY-6385, MetaCyc: PWY-6470, MetaCyc: PWY-6471,
scaffold_33191_1	1064537.AGSO01000011_gene3009	1.6e-51	209.1												S	Mycothiol maleylpyruvate isomerase N-terminal domain	Pfam, Gene3D, SUPERFAMILY, TIGRFAM	PF11716, G3DSA:1.20.120.450, SSF109854, TIGR03083	Mycothiol maleylpyruvate isomerase N-terminal domain, TIGR03083: uncharacterized Actinobacterial protein TIGR03083	IPR024344, IPR034660, IPR034660, IPR017517	Mycothiol-dependent maleylpyruvate isomerase, metal-binding domain, DinB/YfiT-like putative metalloenzymes, DinB/YfiT-like putative metalloenzymes, Conserved hypothetical protein CHP03083, actinobacterial-type	GO:0046872
scaffold_33241_1	1448389.BAVQ01000006_gene3292	2.6e-45	187.6	leuA	2.3.3.13	ko:K01649	ko00290,ko00620,ko01100,ko01110,ko01210,ko01230,map00290,map00620,map01100,map01110,map01210,map01230	M00432	R01213	RC00004,RC00470,RC02754	br01601,ko00000,ko00001,ko00002,ko01000				E	Catalyzes the condensation of the acetyl group of acetyl-CoA with 3-methyl-2-oxobutanoate (2-oxoisovalerate) to form 3-carboxy-3-hydroxy-4-methylpentanoate (2-isopropylmalate)	Gene3D, MobiDBLite, SUPERFAMILY, PANTHER, ProSitePatterns, PANTHER	G3DSA:3.20.20.70, mobidb-lite, SSF51569, PTHR46911, PS00815, PTHR46911:SF1	consensus disorder prediction, Alpha-isopropylmalate and homocitrate synthases signature 1.	IPR013785, IPR002034	Aldolase-type TIM barrel, Alpha-isopropylmalate/homocitrate synthase, conserved site	GO:0000287, GO:0003674, GO:0003824, GO:0003852, GO:0005488, GO:0005575, GO:0005576, GO:0005623, GO:0005886, GO:0006082, GO:0006520, GO:0006551, GO:0006807, GO:0008150, GO:0008152, GO:0008270, GO:0008652, GO:0009058, GO:0009081, GO:0009082, GO:0009098, GO:0009987, GO:0016020, GO:0016053, GO:0016740, GO:0016746, GO:0019752, GO:0030145, GO:0030955, GO:0031420, GO:0040007, GO:0043167, GO:0043169, GO:…	KEGG: 00290+2.3.3.13, KEGG: 00620+2.3.3.13, MetaCyc: PWY-6871,
scaffold_33276_1	1448389.BAVQ01000009_gene3811	7.9e-62	243	yhbH		ko:K09786					ko00000				S	Iron-containing redox enzyme	Pfam, Gene3D	PF14518, G3DSA:1.20.910.10	Iron-containing redox enzyme	IPR016084	Haem oxygenase-like, multi-helical		Reactome: R-HSA-189483, Reactome: R-HSA-917937
scaffold_33276_2	1448389.BAVQ01000009_gene3810	1.5e-10	71.2	prmC_1	2.1.1.297	ko:K02493			R10806	RC00003,RC03279	ko00000,ko01000,ko03012				J	Methyltransferase	NA	NA	NA	NA	NA	na	NA
scaffold_33310_1	1448389.BAVQ01000071_gene2433	4.1e-90	337.4												IQ	Dehydrogenase	Pfam, SUPERFAMILY, PANTHER, PANTHER, PRINTS, PRINTS, PRINTS, PRINTS, ProSitePatterns, Gene3D, CDD	PF00106, SSF51735, PTHR43669, PTHR43669:SF6, PR00081, PR00081, PR00081, PR00081, PS00061, G3DSA:3.40.50.720, cd05233	short chain dehydrogenase, Glucose/ribitol dehydrogenase family signature, Glucose/ribitol dehydrogenase family signature, Glucose/ribitol dehydrogenase family signature, Glucose/ribitol dehydrogenase family signature, Short-chain dehydrogenases/reductases family signature, SDR_c	IPR002347, IPR036291, IPR002347, IPR002347, IPR002347, IPR002347, IPR020904	Short-chain dehydrogenase/reductase SDR, NAD(P)-binding domain superfamily, Short-chain dehydrogenase/reductase SDR, Short-chain dehydrogenase/reductase SDR, Short-chain dehydrogenase/reductase SDR, Short-chain dehydrogenase/reductase SDR, Short-chain dehydrogenase/reductase, conserved site	GO:0016491
scaffold_33367_1	67373.JOBF01000022_gene6623	1.5e-15	89														Gene3D	G3DSA:3.30.1050.10		IPR036527	SCP2 sterol-binding domain superfamily
scaffold_33512_1	196162.Noca_1588	6.8e-77	293.5		2.1.1.72,3.1.21.3,3.1.21.4	ko:K01153,ko:K01155,ko:K03427,ko:K09384					ko00000,ko01000,ko02048				L	Type I site-specific restriction-modification system, R (Restriction) subunit and related	Coils, MobiDBLite, MobiDBLite	Coil, mobidb-lite, mobidb-lite	consensus disorder prediction, consensus disorder prediction
scaffold_33529_1	1448389.BAVQ01000070_gene2250	1.4e-51	209.1			ko:K07032					ko00000				E	glyoxalase bleomycin resistance protein dioxygenase	ProSiteProfiles, SUPERFAMILY, PANTHER, Pfam, Gene3D, PANTHER	PS51819, SSF54593, PTHR36503:SF1, PF00903, G3DSA:3.10.180.10, PTHR36503	Vicinal oxygen chelate (VOC) domain profile, Glyoxalase/Bleomycin resistance protein/Dioxygenase superfamily	IPR037523, IPR029068, IPR004360, IPR029068	Vicinal oxygen chelate (VOC) domain, Glyoxalase/Bleomycin resistance protein/Dihydroxybiphenyl dioxygenase, Glyoxalase/fosfomycin resistance/dioxygenase domain, Glyoxalase/Bleomycin resistance protein/Dihydroxybiphenyl dioxygenase
scaffold_33567_1	1448389.BAVQ01000023_gene1539	1.6e-69	268.9	lipT		ko:K03929					ko00000,ko01000		CE10		I	Belongs to the type-B carboxylesterase lipase family	SUPERFAMILY, PANTHER, Gene3D, PANTHER, Pfam	SSF53474, PTHR43142, G3DSA:3.40.50.1820, PTHR43142:SF9, PF00135	Carboxylesterase family	IPR029058, IPR029058, IPR002018	Alpha/Beta hydrolase fold, Alpha/Beta hydrolase fold, Carboxylesterase, type B
scaffold_33568_2	1121019.AUMN01000001_gene858	6.3e-46	190.3												M	mandelate racemase muconate lactonizing	ProSitePatterns, PANTHER, Gene3D, Pfam, PANTHER, Gene3D, SUPERFAMILY	PS00908, PTHR43287:SF10, G3DSA:3.30.390.10, PF02746, PTHR43287, G3DSA:3.20.20.120, SSF54826	Mandelate racemase / muconate lactonizing enzyme family signature 1, Mandelate racemase / muconate lactonizing enzyme, N-terminal domain	IPR018110, IPR029017, IPR013341, IPR034593, IPR036849	Mandelate racemase/muconate lactonizing enzyme, conserved site, Enolase-like, N-terminal, Mandelate racemase/muconate lactonizing enzyme, N-terminal domain, Mandelate racemase-like, Enolase-like, C-terminal domain superfamily	GO:0009063
scaffold_3374_1	67267.JNXT01000017_gene7190	4.3e-09	67.8		2.1.1.45	ko:K00560	ko00240,ko00670,ko01100,ko01523,map00240,map00670,map01100,map01523	M00053	R02101	RC00219,RC00332	ko00000,ko00001,ko00002,ko01000				F	Catalyzes the reductive methylation of 2-deoxyuridine- 5-monophosphate (dUMP) to 2-deoxythymidine-5-monophosphate (dTMP) while utilizing 5,10-methylenetetrahydrofolate (mTHF) as the methyl donor and reductant in the reaction, yielding dihydrofolate (DHF) as a by-product. This enzymatic reaction provides an intracellular de novo source of dTMP, an essential precursor for DNA biosynthesis	PANTHER, PANTHER, SUPERFAMILY, Pfam, Gene3D, PRINTS, PRINTS	PTHR11548:SF9, PTHR11548, SSF55831, PF00303, G3DSA:3.30.572.10, PR00108, PR00108	Thymidylate synthase, Thymidylate synthase family signature, Thymidylate synthase family signature	IPR036926, IPR023451, IPR036926, IPR000398, IPR000398	Thymidylate synthase/dCMP hydroxymethylase superfamily, Thymidylate synthase/dCMP hydroxymethylase domain, Thymidylate synthase/dCMP hydroxymethylase superfamily, Thymidylate synthase, Thymidylate synthase	GO:0004799, GO:0006231, GO:0004799, GO:0006231	KEGG: 00240+2.1.1.45, KEGG: 00670+2.1.1.45, MetaCyc: PWY-3841, MetaCyc: PWY-7184, MetaCyc: PWY-7187, MetaCyc: PWY-7198, MetaCyc: PWY-7199, MetaCyc: PWY-7210, Reactome: R-HSA-499943, Reactome: R-HSA-69205, KEGG: 00240+2.1.1.45, KEGG: 00670+2.1.1.45, MetaCyc: PWY-3841, MetaCyc: PWY-7184, MetaCyc: PWY-7187, MetaCyc: PWY-7198, MetaCyc: PWY-7199, MetaCyc: PWY-7210, Reactome: R-HSA-499943, Reactome: R-…
scaffold_33770_1	1448389.BAVQ01000023_gene1352	7e-58	230.3												S	SEC-C motif	NA	NA	NA	NA	NA	na	NA
scaffold_33803_1	1095772.CAHH01000026_gene2526	9.3e-10	70.5														MobiDBLite, MobiDBLite, MobiDBLite	mobidb-lite, mobidb-lite, mobidb-lite	consensus disorder prediction, consensus disorder prediction, consensus disorder prediction
scaffold_33891_1	1448389.BAVQ01000080_gene485	5.9e-59	233.4														NA	NA	NA	NA	NA	na	NA
scaffold_33950_1	1448389.BAVQ01000025_gene1241	3.2e-39	167.9		3.6.1.27	ko:K19302	ko00550,map00550		R05627	RC00002	ko00000,ko00001,ko01000,ko01011				I	PFAM phosphoesterase, PA-phosphatase related	TMHMM, TMHMM, TMHMM, TMHMM	TMhelix, TMhelix, TMhelix, TMhelix	Region of a membrane-bound protein predicted to be embedded in the membrane, Region of a membrane-bound protein predicted to be embedded in the membrane, Region of a membrane-bound protein predicted to be embedded in the membrane, Region of a membrane-bound protein predicted to be embedded in the membrane.
scaffold_33985_1	298654.FraEuI1c_7018	1.2e-09	69.7		2.4.1.109	ko:K00728	ko00514,ko00515,ko01100,map00514,map00515,map01100		R04072,R07620,R11399	RC00005,RC00059,RC00397	ko00000,ko00001,ko01000,ko01003		GT39		O	C-terminal four TMM region of protein-O-mannosyltransferase	NA	NA	NA	NA	NA	na	NA
scaffold_34017_1	1121019.AUMN01000001_gene858	1.1e-68	266.2												M	mandelate racemase muconate lactonizing	Pfam, PANTHER, SFLD, SMART, Gene3D, SUPERFAMILY, PANTHER	PF13378, PTHR13794:SF50, SFLDS00001, SM00922, G3DSA:3.20.20.120, SSF51604, PTHR13794	Enolase C-terminal domain-like, Enolase	IPR029065, IPR013342, IPR036849, IPR036849	Enolase C-terminal domain-like, Mandelate racemase/muconate lactonizing enzyme, C-terminal, Enolase-like, C-terminal domain superfamily, Enolase-like, C-terminal domain superfamily
scaffold_34026_1	1448389.BAVQ01000003_gene3502	1.8e-85	322	adoK	2.7.1.15,2.7.1.20	ko:K00852,ko:K00856	ko00030,ko00230,ko01100,map00030,map00230,map01100		R00185,R01051,R02750	RC00002,RC00017	ko00000,ko00001,ko01000			iAF987.Gmet_2683	G	Ribokinase	Pfam, SUPERFAMILY, Gene3D, PANTHER, PANTHER	PF00294, SSF53613, G3DSA:3.40.1190.20, PTHR43085, PTHR43085:SF25	pfkB family carbohydrate kinase	IPR011611, IPR029056, IPR029056	Carbohydrate kinase PfkB, Ribokinase-like, Ribokinase-like	GO:0000166, GO:0000287, GO:0001882, GO:0001883, GO:0003674, GO:0003824, GO:0004001, GO:0005488, GO:0005524, GO:0005525, GO:0005575, GO:0005622, GO:0005623, GO:0005737, GO:0005886, GO:0005975, GO:0006139, GO:0006163, GO:0006164, GO:0006167, GO:0006725, GO:0006753, GO:0006793, GO:0006796, GO:0006807, GO:0008144, GO:0008150, GO:0008152, GO:0009058, GO:0009117, GO:0009123, GO:0009124, GO:0009126, GO:…
scaffold_34031_1	1123065.ATWL01000009_gene976	1.2e-57	229.2	add	3.5.4.4	ko:K01488	ko00230,ko01100,ko05340,map00230,map01100,map05340		R01560,R02556	RC00477	ko00000,ko00001,ko01000				F	Catalyzes the hydrolytic deamination of adenine to hypoxanthine. Plays an important role in the purine salvage pathway and in nitrogen catabolism	Pfam, PANTHER, PANTHER, SUPERFAMILY, Gene3D	PF00962, PTHR43114, PTHR43114:SF2, SSF51556, G3DSA:3.20.20.140	Adenosine/AMP deaminase	IPR001365, IPR032466	Adenosine/AMP deaminase domain, Metal-dependent hydrolase	GO:0019239	Reactome: R-HSA-74217,
scaffold_34085_1	1454010.JEOE01000045_gene1506	5.6e-15	87.8			ko:K03497					ko00000,ko03000,ko03036,ko04812				K	ParB domain protein nuclease	NA	NA	NA	NA	NA	na	NA
scaffold_34170_1	1077144.AGFF01000007_gene1996	7.1e-87	326.6	purB	4.3.2.2	ko:K01756	ko00230,ko00250,ko01100,ko01110,ko01130,map00230,map00250,map01100,map01110,map01130	M00048,M00049	R01083,R04559	RC00379,RC00444,RC00445	ko00000,ko00001,ko00002,ko01000				F	Belongs to the lyase 1 family. Adenylosuccinate lyase subfamily	Gene3D, Pfam, PRINTS, PRINTS, PANTHER, SUPERFAMILY	G3DSA:1.20.200.10, PF00206, PR00149, PR00149, PTHR43172, SSF48557	Lyase, Fumarate lyase superfamily signature, Fumarate lyase superfamily signature	IPR022761, IPR000362, IPR000362, IPR008948	Fumarate lyase, N-terminal, Fumarate lyase family, Fumarate lyase family, L-Aspartase-like	GO:0003824
scaffold_34190_2	1448389.BAVQ01000072_gene2574	1e-31	142.5												CH	Alpha beta hydrolase	Gene3D, PANTHER, PANTHER, SUPERFAMILY	G3DSA:3.40.50.1820, PTHR43329:SF36, PTHR43329, SSF53474		IPR029058, IPR029058	Alpha/Beta hydrolase fold, Alpha/Beta hydrolase fold
scaffold_34202_1	1077144.AGFF01000014_gene3091	4.5e-09	65.9												S	Protein of unknown function (DUF3263)	Pfam	PF11662	Protein of unknown function (DUF3263)	IPR021678	Protein of unknown function DUF3263
scaffold_34202_2	1292020.H483_0113165	4.9e-11	74.3												S	LytR cell envelope-related transcriptional attenuator	MobiDBLite, MobiDBLite, MobiDBLite, TMHMM, MobiDBLite	mobidb-lite, mobidb-lite, mobidb-lite, TMhelix, mobidb-lite	consensus disorder prediction, consensus disorder prediction, consensus disorder prediction, Region of a membrane-bound protein predicted to be embedded in the membrane, consensus disorder prediction
scaffold_34205_1	1448389.BAVQ01000043_gene1859	2.1e-83	315.1	uvrD	3.6.4.12	ko:K03657	ko03420,ko03430,map03420,map03430				ko00000,ko00001,ko01000,ko03400				L	Belongs to the helicase family. UvrD subfamily	Pfam, Gene3D	PF12705, G3DSA:3.90.320.10	PD-(D/E)XK nuclease superfamily	IPR038726, IPR011604	PD-(D/E)XK endonuclease-like domain, AddAB-type, Exonuclease, phage-type/RecB, C-terminal
scaffold_34220_1	1448389.BAVQ01000002_gene2974	1.5e-84	318.9	gyrB	5.99.1.3	ko:K02470					ko00000,ko01000,ko03032,ko03400				L	A type II topoisomerase that negatively supercoils closed circular double-stranded (ds) DNA in an ATP-dependent manner to modulate DNA topology and maintain chromosomes in an underwound state. Negative supercoiling favors strand separation, and DNA replication, transcription, recombination and repair, all of which involve strand separation. Also able to catalyze the interconversion of other topol…	Gene3D, Pfam, PRINTS, PRINTS, PRINTS, SMART, PANTHER, CDD, SUPERFAMILY, SMART	G3DSA:3.30.565.10, PF02518, PR00418, PR00418, PR00418, SM00387, PTHR45866, cd16928, SSF55874, SM00433	Histidine kinase-, DNA gyrase B-, and HSP90-like ATPase, DNA topoisomerase II family signature, DNA topoisomerase II family signature, DNA topoisomerase II family signature, HATPase_GyrB-like	IPR036890, IPR003594, IPR003594, IPR036890, IPR001241	Histidine kinase/HSP90-like ATPase superfamily, Histidine kinase/HSP90-like ATPase, Histidine kinase/HSP90-like ATPase, Histidine kinase/HSP90-like ATPase superfamily, DNA topoisomerase, type IIA	GO:0000166, GO:0000287, GO:0003674, GO:0003824, GO:0003916, GO:0003918, GO:0005488, GO:0005524, GO:0005575, GO:0005618, GO:0005623, GO:0005886, GO:0006139, GO:0006259, GO:0006265, GO:0006725, GO:0006807, GO:0006996, GO:0007059, GO:0008094, GO:0008144, GO:0008150, GO:0008152, GO:0009295, GO:0009987, GO:0016020, GO:0016043, GO:0016462, GO:0016787, GO:0016817, GO:0016818, GO:0016853, GO:0016887, GO:…	Reactome: R-HSA-4615885
scaffold_34507_1	1448389.BAVQ01000023_gene1331	1.1e-10	71.2	aroG	2.5.1.54	ko:K01626	ko00400,ko01100,ko01110,ko01130,ko01230,ko02024,map00400,map01100,map01110,map01130,map01230,map02024	M00022	R01826	RC00435	ko00000,ko00001,ko00002,ko01000				E	Stereospecific condensation of phosphoenolpyruvate (PEP) and D-erythrose-4-phosphate (E4P) giving rise to 3-deoxy-D- arabino-heptulosonate-7-phosphate (DAHP)	Gene3D, SUPERFAMILY	G3DSA:3.20.20.70, SSF51569		IPR013785	Aldolase-type TIM barrel	GO:0003824
scaffold_34507_2	1448389.BAVQ01000023_gene1332	4.4e-47	194.1	yyaL		ko:K06888					ko00000				O	Highly conserved protein containing a thioredoxin domain	NA	NA	NA	NA	NA	na	NA
scaffold_3453_4	979556.MTES_1732	3.3e-31	141												S	Antitoxin component of a toxin-antitoxin (TA) module	TIGRFAM, Pfam, Gene3D, SUPERFAMILY	TIGR01552, PF02604, G3DSA:3.40.1620.10, SSF143120	phd_fam: prevent-host-death family protein, Antitoxin Phd_YefM, type II toxin-antitoxin system	IPR006442, IPR036165	Type II toxin-antitoxin system, antitoxin Phd/YefM, YefM-like superfamily
scaffold_3453_6	1223542.GM1_055_00050	1e-07	63.2														Coils, MobiDBLite	Coil, mobidb-lite	consensus disorder prediction
scaffold_34554_1	1448389.BAVQ01000036_gene947	4.2e-71	274.2												K	Transcriptional regulator	PANTHER, SUPERFAMILY	PTHR47691, SSF52540		IPR027417	P-loop containing nucleoside triphosphate hydrolase
scaffold_34559_1	1448389.BAVQ01000018_gene1220	4.2e-71	274.2	fadE28											I	acyl-CoA dehydrogenase	SUPERFAMILY, PANTHER, Gene3D, PANTHER	SSF56645, PTHR43884, G3DSA:2.40.110.10, PTHR43884:SF20		IPR009100	Acyl-CoA dehydrogenase/oxidase, N-terminal and middle domain superfamily	GO:0000166, GO:0003674, GO:0005488, GO:0006066, GO:0006082, GO:0006629, GO:0006631, GO:0006635, GO:0006706, GO:0006707, GO:0008150, GO:0008152, GO:0008202, GO:0008203, GO:0009056, GO:0009062, GO:0009268, GO:0009405, GO:0009628, GO:0009987, GO:0016042, GO:0016054, GO:0016125, GO:0016127, GO:0019395, GO:0019752, GO:0030258, GO:0032787, GO:0033539, GO:0034440, GO:0036094, GO:0040007, GO:0043167, GO:…
scaffold_34674_1	1385521.N803_02155	5.5e-23	114.4												T	Cyclic nucleotide-monophosphate binding domain	TMHMM, TMHMM, CDD, TMHMM, Gene3D, PANTHER, SUPERFAMILY, Pfam	TMhelix, TMhelix, cd06173, TMhelix, G3DSA:1.20.1250.20, PTHR23513, SSF103473, PF07690	Region of a membrane-bound protein predicted to be embedded in the membrane, Region of a membrane-bound protein predicted to be embedded in the membrane, MFS_MefA_like, Region of a membrane-bound protein predicted to be embedded in the membrane, Major Facilitator Superfamily	IPR036259, IPR011701	MFS transporter superfamily, Major facilitator superfamily	GO:0055085
scaffold_34886_1	1448389.BAVQ01000003_gene3468	1.6e-83	315.5	crtE	2.5.1.1,2.5.1.10,2.5.1.29	ko:K13787	ko00900,ko01100,ko01110,ko01130,map00900,map01100,map01110,map01130	M00364,M00365	R01658,R02003,R02061	RC00279	ko00000,ko00001,ko00002,ko01000,ko01006				H	Belongs to the FPP GGPP synthase family	SFLD, PANTHER, ProSitePatterns, ProSitePatterns, Pfam, Gene3D, PANTHER, SUPERFAMILY	SFLDS00005, PTHR12001:SF76, PS00723, PS00444, PF00348, G3DSA:1.10.600.10, PTHR12001, SSF48576	Isoprenoid Synthase Type I, Polyprenyl synthases signature 1, Polyprenyl synthases signature 2, Polyprenyl synthetase	IPR033749, IPR033749, IPR000092, IPR008949, IPR008949	Polyprenyl synthetase, conserved site, Polyprenyl synthetase, conserved site, Polyprenyl synthetase, Isoprenoid synthase domain superfamily, Isoprenoid synthase domain superfamily	GO:0008299
scaffold_34961_1	1448389.BAVQ01000070_gene2202	7.9e-30	137.1	yhgE		ko:K01421					ko00000				S	YhgE Pip domain protein	PANTHER, PANTHER, TIGRFAM, TIGRFAM, TIGRFAM, TIGRFAM	PTHR43077, PTHR43077:SF5, TIGR03057, TIGR03057, TIGR03057, TIGR03057	xxxLxxG_by_4: X-X-X-Leu-X-X-Gly heptad repeats, xxxLxxG_by_4: X-X-X-Leu-X-X-Gly heptad repeats, xxxLxxG_by_4: X-X-X-Leu-X-X-Gly heptad repeats, xxxLxxG_by_4: X-X-X-Leu-X-X-Gly heptad repeats	IPR023908, IPR023908, IPR023908, IPR023908	xxxLxxG heptad repeat, xxxLxxG heptad repeat, xxxLxxG heptad repeat, xxxLxxG heptad repeat
scaffold_34977_2	1448389.BAVQ01000006_gene3284	2.3e-59	234.6	recR		ko:K06187	ko03440,map03440				ko00000,ko00001,ko03400				L	May play a role in DNA repair. It seems to be involved in an RecBC-independent recombinational process of DNA repair. It may act with RecF and RecO	Gene3D, Pfam, PANTHER, Hamap, Gene3D, SUPERFAMILY, CDD, SMART, ProSiteProfiles, Pfam, Pfam, ProSitePatterns	G3DSA:3.40.1360.10, PF00633, PTHR30446, MF_00017, G3DSA:1.10.8.420, SSF111304, cd00080, SM00278, PS50880, PF02132, PF13662, PS01300	Helix-hairpin-helix motif, Recombination protein RecR [recR], H3TH_StructSpec-5-nucleases, Toprim domain profile, RecR protein, Toprim domain, RecR protein signature.	IPR000445, IPR000093, IPR000093, IPR023627, IPR003583, IPR006171, IPR023628, IPR006171, IPR015967	Helix-hairpin-helix motif, DNA recombination protein RecR, DNA recombination protein RecR, Recombination protein RecR, Helix-hairpin-helix DNA-binding motif, class 1, TOPRIM domain, Recombination protein RecR, C4-type zinc finger, TOPRIM domain, Recombination protein RecR, conserved site	GO:0000731, GO:0006139, GO:0006259, GO:0006281, GO:0006302, GO:0006310, GO:0006725, GO:0006807, GO:0006950, GO:0006974, GO:0008150, GO:0008152, GO:0009058, GO:0009059, GO:0009314, GO:0009411, GO:0009416, GO:0009628, GO:0009987, GO:0018130, GO:0019438, GO:0033554, GO:0034641, GO:0034645, GO:0034654, GO:0043170, GO:0044237, GO:0044238, GO:0044249, GO:0044260, GO:0044271, GO:0046483, GO:0050896, GO:…	Reactome: R-HSA-110357,
scaffold_35053_1	446469.Sked_01370	1.8e-18	99.4	yuaG		ko:K07192	ko04910,map04910				ko00000,ko00001,ko03036,ko04131,ko04147				S	PFAM Band 7 protein	PANTHER, PANTHER, Pfam, Coils	PTHR13806, PTHR13806:SF16, PF15975, Coil	Flotillin	IPR027705, IPR031905	Flotillin family, Flotillin, C-terminal domain		Reactome: R-HSA-8849932, Reactome: R-HSA-8849932,
scaffold_35113_1	1448389.BAVQ01000043_gene1803	8e-35	152.5	nrdH		ko:K06191					ko00000				O	Glutaredoxin	PANTHER, SUPERFAMILY, Gene3D, TIGRFAM, ProSiteProfiles, CDD, Pfam, PANTHER	PTHR34386, SSF52833, G3DSA:3.40.30.10, TIGR02194, PS51354, cd02976, PF00462, PTHR34386:SF1	GlrX_NrdH: glutaredoxin-like protein NrdH, Glutaredoxin domain profile, NrdH, Glutaredoxin	IPR036249, IPR011909, IPR002109, IPR002109	Thioredoxin-like superfamily, Glutaredoxin-like protein NrdH, Glutaredoxin, Glutaredoxin	GO:0045454, GO:0009055, GO:0015035, GO:0045454, GO:0009055, GO:0015035, GO:0045454
scaffold_35279_1	1448389.BAVQ01000072_gene2552	6.1e-91	340.1		1.3.8.4	ko:K00253	ko00280,ko01100,map00280,map01100	M00036	R04095	RC00246	ko00000,ko00001,ko00002,ko01000				I	acyl-CoA dehydrogenase	ProSitePatterns, Gene3D, Pfam, SUPERFAMILY, Gene3D, PANTHER, PANTHER	PS00072, G3DSA:2.40.110.10, PF02770, SSF56645, G3DSA:1.10.540.10, PTHR43835, PTHR43835:SF16	Acyl-CoA dehydrogenases signature 1, Acyl-CoA dehydrogenase, middle domain	IPR006089, IPR006091, IPR009100, IPR037069	Acyl-CoA dehydrogenase, conserved site, Acyl-CoA oxidase/dehydrogenase, central domain, Acyl-CoA dehydrogenase/oxidase, N-terminal and middle domain superfamily, Acyl-CoA dehydrogenase/oxidase, N-terminal domain superfamily	GO:0003995, GO:0055114, GO:0016627, GO:0055114, GO:0016627, GO:0055114, GO:0016627, GO:0050660, GO:0055114
scaffold_35284_1	1448389.BAVQ01000004_gene3709	9.3e-32	143.3														SignalP_GRAM_POSITIVE, ProSiteProfiles, TMHMM, SignalP_GRAM_NEGATIVE	SignalP-TM, PS51318, TMhelix, SignalP-noTM	Twin arginine translocation (Tat) signal profile, Region of a membrane-bound protein predicted to be embedded in the membrane.	IPR006311	Twin-arginine translocation pathway, signal sequence
scaffold_35446_1	1448389.BAVQ01000003_gene3355	2.5e-84	318.2	helD											L	DNA helicase	Gene3D, PANTHER, PANTHER, Coils, SUPERFAMILY, Pfam	G3DSA:3.40.50.300, PTHR11070:SF17, PTHR11070, Coil, SSF52540, PF00580	UvrD/REP helicase N-terminal domain	IPR000212, IPR027417, IPR034739	DNA helicase, UvrD/REP type, P-loop containing nucleoside triphosphate hydrolase, UvrD/AddA helicase, N-terminal	GO:0003677, GO:0003678, GO:0005524, GO:0005524
scaffold_35452_1	446469.Sked_32390	5.2e-42	177.6	yojI		ko:K06159,ko:K06160,ko:K06161	ko02010,map02010				ko00000,ko00001,ko02000	3.A.1.113.1,3.A.1.113.2,3.A.1.113.3			PQ	Cyclic peptide transporter	Gene3D, SUPERFAMILY	G3DSA:3.40.50.300, SSF52540		IPR027417	P-loop containing nucleoside triphosphate hydrolase	GO:0000166, GO:0003674, GO:0005488, GO:0005524, GO:0005575, GO:0006810, GO:0008144, GO:0008150, GO:0015833, GO:0015893, GO:0016020, GO:0016021, GO:0017076, GO:0030554, GO:0031224, GO:0032553, GO:0032555, GO:0032559, GO:0035639, GO:0036094, GO:0042221, GO:0042493, GO:0042884, GO:0042886, GO:0042891, GO:0043167, GO:0043168, GO:0044425, GO:0046677, GO:0050896, GO:0051179, GO:0051234, GO:0071702, GO:…
scaffold_35569_1	1448389.BAVQ01000002_gene2996	4.7e-51	207.6	deoC	3.6.1.13,3.6.1.17,3.6.1.55,3.6.1.61	ko:K01515,ko:K01518,ko:K03574,ko:K18445	ko00230,ko00240,map00230,map00240		R00184,R00969,R01054,R01232,R02805	RC00002	ko00000,ko00001,ko01000,ko03400				L	Belongs to the NUDIX hydrolase family	SUPERFAMILY, CDD, PRINTS, PRINTS, Gene3D, ProSitePatterns, PANTHER, PANTHER, MobiDBLite, Pfam, ProSiteProfiles	SSF55811, cd03673, PR00502, PR00502, G3DSA:3.90.79.10, PS00893, PTHR43736, PTHR43736:SF3, mobidb-lite, PF00293, PS51462	Ap6A_hydrolase, NUDIX hydrolase family signature, NUDIX hydrolase family signature, Nudix box signature, consensus disorder prediction, NUDIX domain, Nudix hydrolase domain profile.	IPR015797, IPR020476, IPR020476, IPR020084, IPR000086, IPR000086	NUDIX hydrolase-like domain superfamily, NUDIX hydrolase, NUDIX hydrolase, NUDIX hydrolase, conserved site, NUDIX hydrolase domain, NUDIX hydrolase domain	GO:0016787, GO:0016787, GO:0016787, GO:0016787	Reactome: R-HSA-2393930, Reactome: R-HSA-2393930,
scaffold_35690_1	1095772.CAHH01000011_gene719	1.2e-35	156	dsbA											Q	Dithiol-disulfide isomerase involved in polyketide biosynthesis	Pfam, PANTHER, PANTHER, Gene3D, SUPERFAMILY	PF01323, PTHR13887, PTHR13887:SF41, G3DSA:3.40.30.10, SSF52833	DSBA-like thioredoxin domain	IPR001853, IPR036249	DSBA-like thioredoxin domain, Thioredoxin-like superfamily	GO:0015035	Reactome: R-HSA-156590, Reactome: R-HSA-9033241,
scaffold_35773_1	1292020.H483_0103105	1.6e-19	101.7														NA	NA	NA	NA	NA	na	NA
scaffold_35773_2	1292020.H483_0103110	3.1e-26	123.6												G	Domain of unknown function (DUF4185)	Pfam	PF13810	Domain of unknown function (DUF4185)	IPR025442	Domain of unknown function DUF4185
scaffold_35790_1	1448389.BAVQ01000072_gene2646	2e-83	315.1	fadE12	1.3.8.7	ko:K00249,ko:K00257	ko00071,ko00280,ko00410,ko00640,ko01100,ko01110,ko01130,ko01200,ko01212,ko03320,map00071,map00280,map00410,map00640,map01100,map01110,map01130,map01200,map01212,map03320	M00013,M00036,M00087	R00924,R01175,R01279,R02661,R03172,R03777,R03857,R03990,R04095,R04432,R04547,R04592,R04751,R04754	RC00052,RC00068,RC00076,RC00095,RC00148,RC00246,RC01942	ko00000,ko00001,ko00002,ko01000				I	acyl-CoA dehydrogenase	PANTHER, SUPERFAMILY, Gene3D, CDD, PANTHER, Pfam	PTHR43835:SF4, SSF47203, G3DSA:1.20.140.10, cd00567, PTHR43835, PF00441	ACAD, Acyl-CoA dehydrogenase, C-terminal domain	IPR036250, IPR009075	Acyl-CoA dehydrogenase-like, C-terminal, Acyl-CoA dehydrogenase/oxidase C-terminal	GO:0003674, GO:0003824, GO:0003995, GO:0005575, GO:0005623, GO:0005886, GO:0008150, GO:0008152, GO:0016020, GO:0016491, GO:0016627, GO:0044464, GO:0055114, GO:0071944GO:0016627, GO:0055114, GO:0016627, GO:0055114
scaffold_35873_1	1123065.ATWL01000006_gene2211	6e-41	173.7	tauB	3.6.3.36	ko:K02049,ko:K10831	ko00920,ko02010,map00920,map02010	M00188,M00435			ko00000,ko00001,ko00002,ko01000,ko02000	3.A.1.16,3.A.1.17,3.A.1.17.1,3.A.1.17.4			P	ABC transporter	SUPERFAMILY, Pfam, Gene3D, PANTHER	SSF52540, PF00005, G3DSA:3.40.50.300, PTHR42788	ABC transporter	IPR027417, IPR003439	P-loop containing nucleoside triphosphate hydrolase, ABC transporter-like	GO:0003674, GO:0003824, GO:0005215, GO:0005342, GO:0005368, GO:0006810, GO:0006811, GO:0006820, GO:0006855, GO:0008150, GO:0008509, GO:0008514, GO:0008559, GO:0015075, GO:0015238, GO:0015399, GO:0015405, GO:0015411, GO:0015711, GO:0015734, GO:0015849, GO:0015893, GO:0016462, GO:0016787, GO:0016817, GO:0016818, GO:0016887, GO:0017111, GO:0022804, GO:0022857, GO:0033283, GO:0034220, GO:0042221, GO:…
scaffold_35881_1	882083.SacmaDRAFT_2036	1.3e-10	71.6												IQ	Belongs to the short-chain dehydrogenases reductases (SDR) family	Gene3D, SUPERFAMILY	G3DSA:3.40.50.720, SSF51735		IPR036291	NAD(P)-binding domain superfamily
scaffold_35881_2	1448389.BAVQ01000025_gene1250	1.2e-53	215.7	ditO	2.3.1.16,2.3.1.9	ko:K00626,ko:K00632	ko00071,ko00072,ko00280,ko00281,ko00310,ko00362,ko00380,ko00592,ko00620,ko00630,ko00640,ko00642,ko00650,ko00720,ko00900,ko01100,ko01110,ko01120,ko01130,ko01200,ko01212,ko02020,map00071,map00072,map00280,map00281,map00310,map00362,map00380,map00592,map00620,map00630,map00640,map00642,map00650,map00720,map00900,map01100,map01110,map01120,map01130,map01200,map01212,map02020	M00087,M00088,M00095,M00113,M00373,M00374,M00375	R00238,R00829,R00927,R01177,R03778,R03858,R03991,R04546,R04742,R04747,R05506,R05586,R07891,R07895,R07899,R08091,R08095	RC00004,RC00326,RC00405,RC01702,RC02728,RC02898,RC02955	ko00000,ko00001,ko00002,ko01000,ko04147				I	Belongs to the thiolase family	ProSitePatterns, PANTHER, SUPERFAMILY, Gene3D, PANTHER, ProSitePatterns, Pfam	PS00737, PTHR18919, SSF53901, G3DSA:3.40.47.10, PTHR18919:SF12, PS00099, PF02803	Thiolases signature 2, Thiolases active site, Thiolase, C-terminal domain	IPR020613, IPR016039, IPR016039, IPR020610, IPR020617	Thiolase, conserved site, Thiolase-like, Thiolase-like, Thiolase, active site, Thiolase, C-terminal	GO:0016747, GO:0003824, GO:0003824, GO:0016747, GO:0016747
scaffold_35925_1	1095772.CAHH01000052_gene246	3.7e-56	224.6														NA	NA	NA	NA	NA	na	NA
scaffold_35940_1	1448389.BAVQ01000071_gene2414	9.3e-84	316.2		3.5.1.104	ko:K22278					ko00000,ko01000				G	polysaccharide deacetylase	NA	NA	NA	NA	NA	na	NA
scaffold_35960_1	1448389.BAVQ01000012_gene3927	4.8e-31	140.2		4.1.2.27	ko:K01634	ko00600,ko01100,ko04071,map00600,map01100,map04071	M00100	R02464,R06516	RC00264,RC00721,RC01266	ko00000,ko00001,ko00002,ko01000				E	Belongs to the group II decarboxylase family	NA	NA	NA	NA	NA	na	NA
scaffold_35960_2	1448389.BAVQ01000012_gene3926	2.6e-31	141			ko:K03292					ko00000	2.A.2			G	Major Facilitator	TMHMM, CDD, TMHMM	TMhelix, cd17332, TMhelix	Region of a membrane-bound protein predicted to be embedded in the membrane, MFS_MelB_like, Region of a membrane-bound protein predicted to be embedded in the membrane.
scaffold_35965_1	1321775.HMPREF1980_00450	7.4e-08	63.5	gyrB2	5.99.1.3	ko:K02470					ko00000,ko01000,ko03032,ko03400				L	DNA topoisomerase (ATP-hydrolyzing)	CDD, Gene3D, PANTHER, PANTHER, SUPERFAMILY, Pfam	cd16928, G3DSA:3.30.565.10, PTHR45866, PTHR45866:SF1, SSF55874, PF02518	HATPase_GyrB-like, Histidine kinase-, DNA gyrase B-, and HSP90-like ATPase	IPR036890, IPR036890, IPR003594	Histidine kinase/HSP90-like ATPase superfamily, Histidine kinase/HSP90-like ATPase superfamily, Histidine kinase/HSP90-like ATPase
scaffold_36076_1	1448389.BAVQ01000072_gene2531	1.6e-80	305.4	dkgA	1.1.1.346	ko:K06221			R08878	RC00089	ko00000,ko01000			iECH74115_1262.ECH74115_4323,iECSP_1301.ECSP_3988	K	aldo keto reductase	PRINTS, PRINTS, PRINTS, PRINTS, ProSitePatterns, Pfam, SUPERFAMILY, PANTHER, Gene3D, CDD	PR00069, PR00069, PR00069, PR00069, PS00062, PF00248, SSF51430, PTHR43827, G3DSA:3.20.20.100, cd06660	Aldo-keto reductase signature, Aldo-keto reductase signature, Aldo-keto reductase signature, Aldo-keto reductase signature, Aldo/keto reductase family signature 2, Aldo/keto reductase family, Aldo_ket_red	IPR020471, IPR020471, IPR020471, IPR020471, IPR018170, IPR023210, IPR036812, IPR020471, IPR036812, IPR023210	Aldo/keto reductase, Aldo/keto reductase, Aldo/keto reductase, Aldo/keto reductase, Aldo/keto reductase, conserved site, NADP-dependent oxidoreductase domain, NADP-dependent oxidoreductase domain superfamily, Aldo/keto reductase, NADP-dependent oxidoreductase domain superfamily, NADP-dependent oxidoreductase domain	GO:0003674, GO:0003824, GO:0004033, GO:0005575, GO:0005622, GO:0005623, GO:0005737, GO:0005829, GO:0006081, GO:0008106, GO:0008150, GO:0008152, GO:0009056, GO:0009438, GO:0009987, GO:0016491, GO:0016614, GO:0016616, GO:0042180, GO:0042182, GO:0044237, GO:0044248, GO:0044281, GO:0044282, GO:0044424, GO:0044444, GO:0044464, GO:0046185, GO:0051596, GO:0055114, GO:0071704, GO:1901575GO:0016491, GO:00…
scaffold_361_14	247156.NFA_39550	7.9e-31	141.7												S	RNA ligase	Pfam, SUPERFAMILY, Gene3D	PF09414, SSF56091, G3DSA:2.40.50.140	RNA ligase	IPR021122	RNA ligase domain, REL/Rln2
scaffold_36115_1	1448389.BAVQ01000012_gene3911	2.5e-73	281.6			ko:K10112	ko02010,map02010	M00194,M00196,M00197,M00200,M00201,M00206,M00207,M00491,M00602,M00605,M00606			ko00000,ko00001,ko00002,ko02000	3.A.1.1			E	Belongs to the ABC transporter superfamily	Gene3D, Gene3D, Pfam, SUPERFAMILY, SUPERFAMILY, Pfam, PANTHER, PANTHER, Gene3D	G3DSA:3.40.50.300, G3DSA:2.40.50.940, PF00005, SSF50331, SSF52540, PF17912, PTHR43875, PTHR43875:SF11, G3DSA:2.40.50.140	ABC transporter, MalK OB fold domain	IPR003439, IPR008995, IPR027417, IPR040582	ABC transporter-like, Molybdate/tungstate binding, C-terminal, P-loop containing nucleoside triphosphate hydrolase, MalK, OB fold domain	GO:0005524, GO:0016887
scaffold_36153_1	1448389.BAVQ01000003_gene3672	2.1e-80	305.1	gdhB	1.4.1.2	ko:K15371	ko00220,ko00250,ko00430,ko00910,ko01100,map00220,map00250,map00430,map00910,map01100		R00243	RC00006,RC02799	ko00000,ko00001,ko01000				E	Dehydrogenase	PANTHER, PANTHER, Pfam	PTHR43403:SF1, PTHR43403, PF05088	Bacterial NAD-glutamate dehydrogenase	IPR007780, IPR028971	NAD-glutamate dehydrogenase, bacteria, NAD-glutamate dehydrogenase	GO:0003674, GO:0003824, GO:0004352, GO:0004353, GO:0005575, GO:0005618, GO:0005622, GO:0005623, GO:0005737, GO:0005829, GO:0005886, GO:0008150, GO:0008152, GO:0016020, GO:0016491, GO:0016638, GO:0016639, GO:0030312, GO:0044424, GO:0044444, GO:0044464, GO:0055114, GO:0071944GO:0004352, GO:0019551, GO:0004352, GO:0019551	KEGG: 00220+1.4.1.2, KEGG: 00250+1.4.1.2, KEGG: 00430+1.4.1.2, KEGG: 00910+1.4.1.2, MetaCyc: PWY-5022, MetaCyc: PWY-6728, MetaCyc: PWY-7126, KEGG: 00220+1.4.1.2, KEGG: 00250+1.4.1.2, KEGG: 00430+1.4.1.2, KEGG: 00910+1.4.1.2, MetaCyc: PWY-5022, MetaCyc: PWY-6728, MetaCyc: PWY-7126
scaffold_36183_1	1435356.Y013_10435	3.1e-79	301.2		2.1.1.14	ko:K00549	ko00270,ko00450,ko01100,ko01110,ko01230,map00270,map00450,map01100,map01110,map01230	M00017	R04405,R09365	RC00035,RC00113,RC01241	ko00000,ko00001,ko00002,ko01000				E	Methionine synthase	Gene3D, SUPERFAMILY	G3DSA:3.20.20.210, SSF51726		IPR038071, IPR038071	UROD/MetE-like superfamily, UROD/MetE-like superfamily		Reactome: R-HSA-189451, Reactome: R-HSA-189451
scaffold_36204_1	1160718.SU9_00030	2.9e-53	214.9	sfnG	1.14.14.35	ko:K17228	ko00920,map00920		R10203	RC02556,RC03080	ko00000,ko00001,ko01000				C	Monooxygenase	SUPERFAMILY, Gene3D, Pfam, PANTHER, PANTHER	SSF51679, G3DSA:3.20.20.30, PF00296, PTHR42847:SF2, PTHR42847	Luciferase-like monooxygenase	IPR036661, IPR036661, IPR011251	Luciferase-like domain superfamily, Luciferase-like domain superfamily, Luciferase-like domain	GO:0016705, GO:0055114, GO:0016705, GO:0055114, GO:0016705, GO:0055114
scaffold_36212_1	1095772.CAHH01000035_gene1928	1.1e-70	272.7	nadE	6.3.1.5,6.3.5.1	ko:K01916,ko:K01950	ko00760,ko01100,map00760,map01100	M00115	R00189,R00257	RC00010,RC00100	ko00000,ko00001,ko00002,ko01000				H	Catalyzes the ATP-dependent amidation of deamido-NAD to form NAD. Uses L-glutamine as a nitrogen source	SUPERFAMILY, PANTHER, Gene3D, TIGRFAM, PANTHER, MobiDBLite, Pfam	SSF52402, PTHR23090, G3DSA:3.40.50.620, TIGR00552, PTHR23090:SF9, mobidb-lite, PF02540	nadE: NAD+ synthetase, consensus disorder prediction, NAD synthase	IPR003694, IPR014729, IPR003694, IPR022310	NAD(+) synthetase, Rossmann-like alpha/beta/alpha sandwich fold, NAD(+) synthetase, NAD/GMP synthase	GO:0003674, GO:0003824, GO:0005575, GO:0005622, GO:0005623, GO:0005737, GO:0006139, GO:0006725, GO:0006732, GO:0006733, GO:0006753, GO:0006793, GO:0006796, GO:0006807, GO:0008150, GO:0008152, GO:0008795, GO:0009058, GO:0009108, GO:0009117, GO:0009165, GO:0009435, GO:0009987, GO:0016874, GO:0016879, GO:0016880, GO:0018130, GO:0019359, GO:0019362, GO:0019363, GO:0019438, GO:0019637, GO:0019674, GO:…	KEGG: 00760+6.3.1.5, Reactome: R-HSA-196807, KEGG: 00760+6.3.1.5, Reactome: R-HSA-196807,
scaffold_36235_1	1292020.H483_0118320	3.9e-82	310.8														NA	NA	NA	NA	NA	na	NA
scaffold_36238_1	1292020.H483_0108505	6.9e-71	273.5	araJ		ko:K19577					ko00000,ko02000	2.A.1.2.65			EGP	Major facilitator Superfamily	TMHMM, CDD, PANTHER, Gene3D, TMHMM, ProSiteProfiles, TMHMM, Pfam, TMHMM, SUPERFAMILY	TMhelix, cd17324, PTHR43124, G3DSA:1.20.1250.20, TMhelix, PS50850, TMhelix, PF07690, TMhelix, SSF103473	Region of a membrane-bound protein predicted to be embedded in the membrane, MFS_NepI_like, Region of a membrane-bound protein predicted to be embedded in the membrane, Major facilitator superfamily (MFS) profile, Region of a membrane-bound protein predicted to be embedded in the membrane, Major Facilitator Superfamily, Region of a membrane-bound protein predicted to be embedded in the membrane.	IPR020846, IPR011701, IPR036259	Major facilitator superfamily domain, Major facilitator superfamily, MFS transporter superfamily	GO:0005575, GO:0005623, GO:0005886, GO:0016020, GO:0044464, GO:0071944GO:0055085
scaffold_36296_1	1448389.BAVQ01000071_gene2449	1.5e-73	282.3	glfT	2.4.1.288	ko:K16650					ko00000,ko01000,ko01003		GT2	iNJ661.Rv3808c	NU	Glycosyl transferase	NA	NA	NA	NA	NA	GO:0000271, GO:0003674, GO:0003824, GO:0005575, GO:0005622, GO:0005623, GO:0005737, GO:0005829, GO:0005886, GO:0005975, GO:0005976, GO:0006139, GO:0006629, GO:0006725, GO:0006793, GO:0006807, GO:0008150, GO:0008152, GO:0008194, GO:0008378, GO:0008610, GO:0008653, GO:0008921, GO:0009058, GO:0009059, GO:0009103, GO:0009225, GO:0009273, GO:0009987, GO:0010383, GO:0016020, GO:0016043, GO:0016051, GO:…	NA
scaffold_36321_1	1095772.CAHH01000022_gene861	2.8e-66	258.1	trxB	1.8.1.9,4.3.1.9	ko:K00384,ko:K22345	ko00030,ko00450,map00030,map00450		R01544,R02016,R03596,R09372	RC00013,RC00544,RC02518,RC02873	ko00000,ko00001,ko01000			iPC815.YPO1374	C	Belongs to the class-II pyridine nucleotide-disulfide oxidoreductase family	Pfam, Gene3D, Gene3D, PANTHER, PRINTS, PRINTS, PRINTS, SUPERFAMILY	PF07992, G3DSA:3.50.50.60, G3DSA:3.50.50.60, PTHR42863, PR00469, PR00469, PR00469, SSF51905	Pyridine nucleotide-disulphide oxidoreductase, Pyridine nucleotide disulphide reductase class-II signature, Pyridine nucleotide disulphide reductase class-II signature, Pyridine nucleotide disulphide reductase class-II signature	IPR023753, IPR036188, IPR036188, IPR036188	FAD/NAD(P)-binding domain, FAD/NAD(P)-binding domain superfamily, FAD/NAD(P)-binding domain superfamily, FAD/NAD(P)-binding domain superfamily	GO:0000166, GO:0003674, GO:0003824, GO:0004791, GO:0005488, GO:0005575, GO:0005622, GO:0005623, GO:0005737, GO:0005829, GO:0008150, GO:0008152, GO:0009636, GO:0009987, GO:0015036, GO:0016209, GO:0016491, GO:0016651, GO:0016667, GO:0016668, GO:0036094, GO:0042221, GO:0043167, GO:0043168, GO:0044424, GO:0044444, GO:0044464, GO:0048037, GO:0050660, GO:0050662, GO:0050896, GO:0051716, GO:0055114, GO:…
scaffold_36441_2	321955.AAGP01000050_gene3727	4.5e-48	197.2	nanL	4.3.3.7	ko:K01714	ko00261,ko00300,ko01100,ko01110,ko01120,ko01130,ko01230,map00261,map00300,map01100,map01110,map01120,map01130,map01230	M00016,M00525,M00526,M00527	R10147	RC03062,RC03063	ko00000,ko00001,ko00002,ko01000				EM	Belongs to the DapA family	Gene3D, PANTHER, SUPERFAMILY, Pfam	G3DSA:3.20.20.70, PTHR12128, SSF51569, PF00701	Dihydrodipicolinate synthetase family	IPR013785, IPR002220, IPR002220	Aldolase-type TIM barrel, DapA-like, DapA-like	GO:0003824, GO:0016829, GO:0016829
scaffold_36463_1	1448389.BAVQ01000037_gene2042	9e-39	166	megL	2.5.1.48,4.4.1.1,4.4.1.11,4.4.1.8	ko:K01739,ko:K01758,ko:K01760,ko:K01761	ko00260,ko00270,ko00450,ko00920,ko01100,ko01110,ko01130,ko01230,map00260,map00270,map00450,map00920,map01100,map01110,map01130,map01230	M00017,M00338	R00654,R00782,R00999,R01001,R01286,R01288,R02408,R02508,R03217,R03260,R04770,R04930,R04941,R04944,R04945,R04946,R09366	RC00020,RC00056,RC00069,RC00196,RC00348,RC00382,RC00420,RC00488,RC00710,RC01209,RC01210,RC01245,RC02303,RC02848,RC02866	ko00000,ko00001,ko00002,ko01000,ko04147				E	cystathionine	Pfam, SUPERFAMILY, Gene3D	PF01053, SSF53383, G3DSA:3.40.640.10	Cys/Met metabolism PLP-dependent enzyme	IPR000277, IPR015424, IPR015421	Cys/Met metabolism, pyridoxal phosphate-dependent enzyme, Pyridoxal phosphate-dependent transferase, Pyridoxal phosphate-dependent transferase, major domain	GO:0019346, GO:0030170, GO:0003824	Reactome: R-HSA-1614558, Reactome: R-HSA-1614603, Reactome: R-HSA-2408508,
scaffold_36557_1	1448389.BAVQ01000016_gene4105	2.9e-69	267.7	purQ	6.3.5.3	ko:K01952	ko00230,ko01100,ko01110,ko01130,map00230,map01100,map01110,map01130	M00048	R04463	RC00010,RC01160	ko00000,ko00001,ko00002,ko01000				F	Part of the phosphoribosylformylglycinamidine synthase complex involved in the purines biosynthetic pathway. Catalyzes the ATP-dependent conversion of formylglycinamide ribonucleotide (FGAR) and glutamine to yield formylglycinamidine ribonucleotide (FGAM) and glutamate. The FGAM synthase complex is composed of three subunits. PurQ produces an ammonia molecule by converting glutamine to glutamate.…	SUPERFAMILY, Coils, Pfam, Gene3D, PANTHER, SMART, ProSiteProfiles	SSF52317, Coil, PF13507, G3DSA:3.40.50.880, PTHR47552, SM01211, PS51273	CobB/CobQ-like glutamine amidotransferase domain, Glutamine amidotransferase type 1 domain profile.	IPR029062, IPR029062, IPR017926	Class I glutamine amidotransferase-like, Class I glutamine amidotransferase-like, Glutamine amidotransferase	GO:0003674, GO:0003824, GO:0004642, GO:0005575, GO:0005622, GO:0005623, GO:0005737, GO:0005886, GO:0006139, GO:0006163, GO:0006164, GO:0006725, GO:0006753, GO:0006793, GO:0006796, GO:0006807, GO:0008150, GO:0008152, GO:0009058, GO:0009117, GO:0009150, GO:0009152, GO:0009165, GO:0009259, GO:0009260, GO:0009987, GO:0016020, GO:0016874, GO:0016879, GO:0016884, GO:0018130, GO:0019438, GO:0019637, GO:…
scaffold_36598_1	1095772.CAHH01000059_gene1385	2e-62	245.4	rsmC	2.1.1.172	ko:K00564			R07234	RC00003	ko00000,ko01000,ko03009				J	methyltransferase small	PANTHER, Gene3D, PANTHER, CDD, Pfam, SUPERFAMILY	PTHR47816:SF4, G3DSA:3.40.50.150, PTHR47816, cd02440, PF05175, SSF53335	AdoMet_MTases, Methyltransferase small domain	IPR007848, IPR029063	Methyltransferase small domain, S-adenosyl-L-methionine-dependent methyltransferase	GO:0003674, GO:0003824, GO:0005575, GO:0005622, GO:0005623, GO:0005737, GO:0008150, GO:0008152, GO:0008168, GO:0008757, GO:0016740, GO:0016741, GO:0032259, GO:0044424, GO:0044464GO:0008168
scaffold_36610_1	1448389.BAVQ01000027_gene1098	4.8e-20	103.6												M	Fusaric acid resistance protein-like	TMHMM, TMHMM	TMhelix, TMhelix	Region of a membrane-bound protein predicted to be embedded in the membrane, Region of a membrane-bound protein predicted to be embedded in the membrane.
scaffold_36610_2	1448389.BAVQ01000027_gene1109	3.9e-11	73.2		3.1.11.5,3.1.12.1,3.6.4.12	ko:K01144,ko:K07464,ko:K16898					ko00000,ko01000,ko02048,ko03400				L	A helicase nuclease that prepares dsDNA breaks (DSB) for recombinational DNA repair. Binds to DSBs and unwinds DNA via a highly rapid and processive ATP-dependent bidirectional helicase activity. Unwinds dsDNA until it encounters a Chi (crossover hotspot instigator) sequence from the 3 direction. Cuts ssDNA a few nucleotides 3 to the Chi site. The properties and activities of the enzyme are chang…	NA	NA	NA	NA	NA	na	NA
scaffold_36612_1	1448389.BAVQ01000029_gene631	8.4e-53	213.4												S	membrane	MobiDBLite, TMHMM, TMHMM, Pfam, TMHMM	mobidb-lite, TMhelix, TMhelix, PF15420, TMhelix	consensus disorder prediction, Region of a membrane-bound protein predicted to be embedded in the membrane, Region of a membrane-bound protein predicted to be embedded in the membrane, Alpha/beta-hydrolase family N-terminus, Region of a membrane-bound protein predicted to be embedded in the membrane.	IPR027788	Alpha/beta-hydrolase, N-terminal domain
scaffold_36639_1	1448389.BAVQ01000002_gene2994	3.3e-73	281.2	murJ		ko:K03980					ko00000,ko01011,ko02000	2.A.66.4			KLT	Integral membrane protein MviN	Gene3D, CDD, Gene3D	G3DSA:3.30.200.20, cd13973, G3DSA:1.10.510.10	PK_MviN-like			GO:0003674, GO:0005215, GO:0005575, GO:0005576, GO:0005623, GO:0005886, GO:0005887, GO:0006810, GO:0006855, GO:0008150, GO:0015238, GO:0015893, GO:0016020, GO:0016021, GO:0022857, GO:0031224, GO:0031226, GO:0042221, GO:0042493, GO:0042891, GO:0042895, GO:0044425, GO:0044459, GO:0044464, GO:0046677, GO:0050896, GO:0051179, GO:0051234, GO:0055085, GO:0071944
scaffold_36724_1	1448389.BAVQ01000084_gene45	9.9e-62	243	ptsI	2.7.3.9	ko:K08483	ko02060,map02060				ko00000,ko00001,ko01000,ko02000	8.A.7			G	General (non sugar-specific) component of the phosphoenolpyruvate-dependent sugar phosphotransferase system (sugar PTS). This major carbohydrate active-transport system catalyzes the phosphorylation of incoming sugar substrates concomitantly with their translocation across the cell membrane. Enzyme I transfers the phosphoryl group from phosphoenolpyruvate (PEP) to the phosphoryl carrier protein (…	MobiDBLite, Gene3D, PANTHER, Pfam, PANTHER, SUPERFAMILY	mobidb-lite, G3DSA:3.20.20.60, PTHR46244:SF2, PF02896, PTHR46244, SSF51621	consensus disorder prediction, PEP-utilising enzyme, TIM barrel domain	IPR040442, IPR000121, IPR015813	Pyruvate kinase-like domain superfamily, PEP-utilising enzyme, C-terminal, Pyruvate/Phosphoenolpyruvate kinase-like domain superfamily	GO:0016310, GO:0016772, GO:0003824
scaffold_36742_1	1448389.BAVQ01000072_gene2530	4.3e-89	334	acsA	6.2.1.1	ko:K01895	ko00010,ko00620,ko00640,ko00680,ko00720,ko01100,ko01110,ko01120,ko01130,ko01200,map00010,map00620,map00640,map00680,map00720,map01100,map01110,map01120,map01130,map01200	M00357	R00235,R00236,R00316,R00926,R01354	RC00004,RC00012,RC00043,RC00070,RC02746,RC02816	ko00000,ko00001,ko00002,ko01000,ko01004				I	Catalyzes the conversion of acetate into acetyl-CoA (AcCoA), an essential intermediate at the junction of anabolic and catabolic pathways. AcsA undergoes a two-step reaction. In the first half reaction, AcsA combines acetate with ATP to form acetyl-adenylate (AcAMP) intermediate. In the second half reaction, it can then transfer the acetyl group from AcAMP to the sulfhydryl group of CoA, forming …	Gene3D, PANTHER, Pfam, SUPERFAMILY, CDD, PANTHER	G3DSA:3.40.50.12780, PTHR24095:SF14, PF00501, SSF56801, cd05966, PTHR24095	AMP-binding enzyme, ACS	IPR042099, IPR000873	AMP-dependent synthetase-like superfamily, AMP-dependent synthetase/ligase	GO:0003824
scaffold_36763_1	1448389.BAVQ01000070_gene2143	6.1e-49	200.3		2.1.1.79	ko:K00574					ko00000,ko01000				M	cyclopropane-fatty-acyl-phospholipid synthase	NA	NA	NA	NA	NA	na	NA
scaffold_36817_2	1122130.AUHN01000004_gene870	1.2e-31	142.5			ko:K02025,ko:K15771,ko:K17330	ko02010,map02010	M00207,M00491,M00606			ko00000,ko00001,ko00002,ko02000	3.A.1.1,3.A.1.1.16,3.A.1.1.2,3.A.1.1.33			G	PFAM binding-protein-dependent transport systems inner membrane component	SUPERFAMILY, Gene3D, TMHMM, PANTHER, PANTHER	SSF161098, G3DSA:1.10.3720.10, TMhelix, PTHR43227, PTHR43227:SF6	Region of a membrane-bound protein predicted to be embedded in the membrane.	IPR035906, IPR035906	MetI-like superfamily, MetI-like superfamily
scaffold_36819_1	471856.Jden_0432	1.8e-55	222.2	pon1	2.4.1.129,3.4.16.4	ko:K05365,ko:K05366	ko00550,ko01100,ko01501,map00550,map01100,map01501		R04519	RC00005,RC00049	ko00000,ko00001,ko01000,ko01003,ko01011		GT51		M	penicillin-binding protein	SUPERFAMILY, Pfam, PANTHER, Gene3D, Gene3D, TMHMM	SSF53955, PF00912, PTHR32282, G3DSA:1.10.3810.10, G3DSA:3.90.1310.20, TMhelix	Transglycosylase, Region of a membrane-bound protein predicted to be embedded in the membrane.	IPR023346, IPR001264, IPR036950	Lysozyme-like domain superfamily, Glycosyl transferase, family 51, Penicillin binding protein transglycosylase domain		KEGG: 00550+2.4.1.129, MetaCyc: PWY-5265, MetaCyc: PWY-6385, MetaCyc: PWY-6470, MetaCyc: PWY-6471, KEGG: 00550+2.4.1.129, MetaCyc: PWY-5265, MetaCyc: PWY-6385, MetaCyc: PWY-6470, MetaCyc: PWY-6471,
scaffold_36891_1	1448389.BAVQ01000070_gene2186	6e-75	287	aftD		ko:K16648					ko00000,ko01000,ko01003				I	capsule polysaccharide biosynthetic process	TMHMM, TMHMM, TMHMM, TMHMM, Pfam	TMhelix, TMhelix, TMhelix, TMhelix, PF11847	Region of a membrane-bound protein predicted to be embedded in the membrane, Region of a membrane-bound protein predicted to be embedded in the membrane, Region of a membrane-bound protein predicted to be embedded in the membrane, Region of a membrane-bound protein predicted to be embedded in the membrane, Alpha-(1->3)-arabinofuranosyltransferase	IPR021798	Alpha-(1->3)-arabinofuranosyltransferase	GO:0005575, GO:0005623, GO:0005886, GO:0008150, GO:0016020, GO:0040007, GO:0044464, GO:0071944GO:0016740	KEGG: 00571+2.4.2.47, KEGG: 00572+2.4.2.47, MetaCyc: PWY-6397
scaffold_36897_2	1077144.AGFF01000031_gene2813	8e-28	129	mpb		ko:K03286					ko00000,ko02000	1.B.6			M	Fasciclin	Pfam, ProSiteProfiles, Gene3D, SUPERFAMILY	PF02469, PS50213, G3DSA:2.30.180.10, SSF82153	Fasciclin domain, FAS1/BIgH3 domain profile.	IPR000782, IPR000782, IPR036378, IPR036378	FAS1 domain, FAS1 domain, FAS1 domain superfamily, FAS1 domain superfamily
scaffold_36898_2	1122130.AUHN01000006_gene1936	4.8e-15	86.3	yciO	2.7.7.87	ko:K07566			R10463	RC00745	ko00000,ko01000,ko03009,ko03016				J	Belongs to the SUA5 family	SUPERFAMILY, Gene3D	SSF55821, G3DSA:3.90.870.10		IPR017945	DHBP synthase RibB-like alpha/beta domain superfamily	GO:0005575, GO:0005622, GO:0005623, GO:0005737, GO:0005829, GO:0044424, GO:0044444, GO:0044464
scaffold_36966_1	1077144.AGFF01000031_gene2811	1.6e-75	288.9												EGP	Major facilitator Superfamily	CDD, Pfam, TMHMM, PANTHER, TMHMM, TMHMM, SUPERFAMILY, Gene3D, ProSiteProfiles, PANTHER, TMHMM, TMHMM	cd17502, PF07690, TMhelix, PTHR23501:SF166, TMhelix, TMhelix, SSF103473, G3DSA:1.20.1250.20, PS50850, PTHR23501, TMhelix, TMhelix	MFS_Azr1_MDR_like, Major Facilitator Superfamily, Region of a membrane-bound protein predicted to be embedded in the membrane, Region of a membrane-bound protein predicted to be embedded in the membrane, Region of a membrane-bound protein predicted to be embedded in the membrane, Major facilitator superfamily (MFS) profile, Region of a membrane-bound protein predicted to be embedded in the membra…	IPR011701, IPR036259, IPR020846, IPR001411	Major facilitator superfamily, MFS transporter superfamily, Major facilitator superfamily domain, Tetracycline resistance protein/drug resistance transporter	GO:0055085
scaffold_37003_1	591158.SSMG_03249	2.8e-23	115.2			ko:K03265	ko03015,map03015				ko00000,ko00001,ko03012,ko03019				J	translation release factor activity	MobiDBLite	mobidb-lite	consensus disorder prediction			GO:0001666, GO:0005575, GO:0005618, GO:0005622, GO:0005623, GO:0005737, GO:0005829, GO:0005886, GO:0006950, GO:0008150, GO:0009628, GO:0016020, GO:0030312, GO:0036293, GO:0044424, GO:0044444, GO:0044464, GO:0050896, GO:0070482, GO:0071944
scaffold_37074_1	1448389.BAVQ01000071_gene2507	1.9e-30	138.3			ko:K07245					ko00000,ko02000	9.B.62.1			P	copper resistance	TMHMM, Pfam	TMhelix, PF05425	Region of a membrane-bound protein predicted to be embedded in the membrane, Copper resistance protein D	IPR008457	Copper resistance protein D	GO:0016021
scaffold_37074_2	1448389.BAVQ01000071_gene2508	9e-09	65.1	fabH	2.3.1.180	ko:K00648,ko:K11608	ko00061,ko01100,ko01212,map00061,map01100,map01212	M00082,M00083	R10707	RC00004,RC02729,RC02888	ko00000,ko00001,ko00002,ko01000,ko01004				I	Catalyzes the condensation reaction of fatty acid synthesis by the addition to an acyl acceptor of two carbons from malonyl-ACP. Catalyzes the first condensation reaction which initiates fatty acid synthesis and may therefore play a role in governing the total rate of fatty acid production. Possesses both acetoacetyl-ACP synthase and acetyl transacylase activities. Its substrate specificity deter…	SUPERFAMILY, Pfam, TMHMM, Gene3D	SSF53901, PF08541, TMhelix, G3DSA:3.40.47.10	3-Oxoacyl-[acyl-carrier-protein (ACP)] synthase III C terminal, Region of a membrane-bound protein predicted to be embedded in the membrane.	IPR016039, IPR013747, IPR016039	Thiolase-like, 3-Oxoacyl-acyl-carrier-protein (ACP)] synthase III, C-terminal, Thiolase-like	GO:0003824, GO:0003824	KEGG: 00061+2.3.1.180, MetaCyc: PWY-4381,
scaffold_37148_1	1448389.BAVQ01000068_gene2112	7.3e-45	186.8												L	required for the transposition of insertion element IS2404	PANTHER, TMHMM, Pfam	PTHR30298, TMhelix, PF13808	Region of a membrane-bound protein predicted to be embedded in the membrane, DDE_Tnp_1-associated	IPR032806	H repeat-associated protein, N-terminal
scaffold_37150_1	471856.Jden_0373	8.1e-16	90.5												M	Peptidoglycan-binding domain 1 protein	Gene3D, Gene3D	G3DSA:2.40.30.170, G3DSA:2.40.420.20
scaffold_37197_1	649831.L083_0372	1.1e-09	70.1														NA	NA	NA	NA	NA	na	NA
scaffold_37223_1	1095772.CAHH01000075_gene1588	1.8e-33	149.1												I	dehydratase	Gene3D, PANTHER, PANTHER	G3DSA:3.10.129.10, PTHR43841:SF1, PTHR43841
scaffold_37294_1	1448389.BAVQ01000022_gene1598	3.9e-45	187.2												C	Luciferase-like monooxygenase	Pfam, Gene3D, SUPERFAMILY	PF00296, G3DSA:3.20.20.30, SSF51679	Luciferase-like monooxygenase	IPR011251, IPR036661, IPR036661	Luciferase-like domain, Luciferase-like domain superfamily, Luciferase-like domain superfamily	GO:0016705, GO:0055114, GO:0016705, GO:0055114, GO:0016705, GO:0055114
scaffold_37318_1	1123322.KB904709_gene103	1.4e-39	169.5			ko:K02025,ko:K10233,ko:K15771	ko02010,map02010	M00201,M00207,M00491			ko00000,ko00001,ko00002,ko02000	3.A.1.1,3.A.1.1.16,3.A.1.1.2,3.A.1.1.32,3.A.1.1.8			G	PFAM binding-protein-dependent transport systems inner membrane component	Gene3D, Coils, SUPERFAMILY	G3DSA:2.60.40.10, Coil, SSF49478		IPR013783	Immunoglobulin-like fold
scaffold_37347_1	1095772.CAHH01000030_gene1717	3.4e-62	244.6	metB	2.5.1.48,4.4.1.8	ko:K01739,ko:K01760	ko00270,ko00450,ko00920,ko01100,ko01110,ko01130,ko01230,map00270,map00450,map00920,map01100,map01110,map01130,map01230	M00017	R00782,R00999,R01286,R01288,R02408,R02508,R03217,R03260,R04941,R04944,R04945,R04946	RC00020,RC00056,RC00069,RC00382,RC00420,RC00488,RC00710,RC01245,RC02303,RC02848,RC02866	ko00000,ko00001,ko00002,ko01000				E	Pfam Cys Met metabolism	PANTHER, Gene3D, Pfam, SUPERFAMILY	PTHR11808, G3DSA:3.40.640.10, PF01053, SSF53383	Cys/Met metabolism PLP-dependent enzyme	IPR000277, IPR015421, IPR000277, IPR015424	Cys/Met metabolism, pyridoxal phosphate-dependent enzyme, Pyridoxal phosphate-dependent transferase, major domain, Cys/Met metabolism, pyridoxal phosphate-dependent enzyme, Pyridoxal phosphate-dependent transferase	GO:0019346, GO:0030170, GO:0003824, GO:0019346, GO:0030170	Reactome: R-HSA-1614558, Reactome: R-HSA-1614603, Reactome: R-HSA-2408508, Reactome: R-HSA-1614558, Reactome: R-HSA-1614603, Reactome: R-HSA-2408508,
scaffold_37366_1	471853.Bcav_4182	3.5e-51	208	mrcB	2.4.1.129,2.7.11.1,3.4.16.4	ko:K05365,ko:K05366,ko:K12132	ko00550,ko01100,ko01501,map00550,map01100,map01501		R04519	RC00005,RC00049	ko00000,ko00001,ko01000,ko01001,ko01003,ko01011		GT51		M	penicillin-binding protein	SUPERFAMILY, PANTHER, TMHMM, Gene3D, Pfam, SignalP_EUK, PANTHER	SSF53955, PTHR32282:SF8, TMhelix, G3DSA:1.10.3810.10, PF00912, SignalP-TM, PTHR32282	Region of a membrane-bound protein predicted to be embedded in the membrane, Transglycosylase	IPR023346, IPR036950, IPR001264	Lysozyme-like domain superfamily, Penicillin binding protein transglycosylase domain, Glycosyl transferase, family 51		KEGG: 00550+2.4.1.129, MetaCyc: PWY-5265, MetaCyc: PWY-6385, MetaCyc: PWY-6470, MetaCyc: PWY-6471, KEGG: 00550+2.4.1.129, MetaCyc: PWY-5265, MetaCyc: PWY-6385, MetaCyc: PWY-6470, MetaCyc: PWY-6471,
scaffold_37400_1	1448389.BAVQ01000090_gene2087	1.7e-54	218.8												S	nuclear transport factor 2	Gene3D, SUPERFAMILY, Pfam	G3DSA:3.10.450.50, SSF54427, PF12680	SnoaL-like domain	IPR032710, IPR037401	NTF2-like domain superfamily, SnoaL-like domain
scaffold_37484_1	1448389.BAVQ01000043_gene1834	1.7e-66	258.8	mscS		ko:K22044					ko00000,ko02000	1.A.23.3			M	mechanosensitive ion channel	Pfam, SUPERFAMILY, PANTHER, SignalP_GRAM_POSITIVE, SUPERFAMILY, Gene3D, PANTHER, Gene3D	PF00924, SSF50182, PTHR30460, SignalP-TM, SSF82861, G3DSA:3.30.70.100, PTHR30460:SF0, G3DSA:2.30.30.60	Mechanosensitive ion channel	IPR006685, IPR010920, IPR011014, IPR023408	Mechanosensitive ion channel MscS, LSM domain superfamily, Mechanosensitive ion channel MscS, transmembrane-2, Mechanosensitive ion channel MscS domain superfamily	GO:0016020, GO:0055085, GO:0016020
scaffold_37522_1	1448389.BAVQ01000036_gene891	3.6e-88	330.9	ftsH		ko:K03798		M00742			ko00000,ko00002,ko01000,ko01002,ko03110				O	Acts as a processive, ATP-dependent zinc metallopeptidase for both cytoplasmic and membrane proteins. Plays a role in the quality control of integral membrane proteins	Gene3D, SUPERFAMILY, SUPERFAMILY, Pfam, Gene3D, Pfam, PANTHER, PANTHER	G3DSA:1.10.8.60, SSF52540, SSF140990, PF17862, G3DSA:1.20.58.760, PF01434, PTHR23076, PTHR23076:SF97	AAA+ lid domain, Peptidase family M41	IPR027417, IPR037219, IPR041569, IPR037219, IPR000642	P-loop containing nucleoside triphosphate hydrolase, Peptidase M41-like, AAA ATPase, AAA+ lid domain, Peptidase M41-like, Peptidase M41	GO:0000166, GO:0003674, GO:0003824, GO:0004175, GO:0004176, GO:0004222, GO:0005488, GO:0005515, GO:0005524, GO:0005575, GO:0005622, GO:0005623, GO:0005737, GO:0005829, GO:0005886, GO:0005887, GO:0006508, GO:0006807, GO:0006950, GO:0006979, GO:0008144, GO:0008150, GO:0008152, GO:0008233, GO:0008237, GO:0008270, GO:0009056, GO:0009057, GO:0010468, GO:0016020, GO:0016021, GO:0016462, GO:0016787, GO:…	Reactome: R-HSA-8949664, Reactome: R-HSA-8949664, Reactome: R-HSA-8949664,
scaffold_37604_1	253839.SSNG_03733	1.1e-14	84.7														NA	NA	NA	NA	NA	na	NA
scaffold_37635_1	1095772.CAHH01000024_gene2012	8.3e-37	160.2												EGP	Pfam Major Facilitator Superfamily	TMHMM, PANTHER, CDD, TMHMM, Gene3D, TMHMM, PANTHER, TMHMM, SUPERFAMILY, ProSiteProfiles	TMhelix, PTHR23513:SF17, cd06173, TMhelix, G3DSA:1.20.1250.20, TMhelix, PTHR23513, TMhelix, SSF103473, PS50850	Region of a membrane-bound protein predicted to be embedded in the membrane, MFS_MefA_like, Region of a membrane-bound protein predicted to be embedded in the membrane, Region of a membrane-bound protein predicted to be embedded in the membrane, Region of a membrane-bound protein predicted to be embedded in the membrane, Major facilitator superfamily (MFS) profile.	IPR036259, IPR020846	MFS transporter superfamily, Major facilitator superfamily domain
scaffold_37644_1	1448389.BAVQ01000003_gene3456	4.6e-72	277.3	murF	6.3.2.10	ko:K01929	ko00300,ko00550,ko01100,ko01502,map00300,map00550,map01100,map01502		R04573,R04617	RC00064,RC00141	ko00000,ko00001,ko01000,ko01011				M	Involved in cell wall formation. Catalyzes the final step in the synthesis of UDP-N-acetylmuramoyl-pentapeptide, the precursor of murein	SUPERFAMILY, Gene3D, PANTHER, Gene3D, SUPERFAMILY, Pfam	SSF53623, G3DSA:3.90.190.20, PTHR43024, G3DSA:3.40.1190.10, SSF53244, PF02875	Mur ligase family, glutamate ligase domain	IPR036565, IPR036615, IPR036565, IPR036615, IPR004101	Mur-like, catalytic domain superfamily, Mur ligase, C-terminal domain superfamily, Mur-like, catalytic domain superfamily, Mur ligase, C-terminal domain superfamily, Mur ligase, C-terminal	GO:0008150, GO:0040007GO:0005524, GO:0009058, GO:0005524, GO:0009058, GO:0016874, GO:0005524, GO:0009058, GO:0005524, GO:0009058, GO:0016874, GO:0005524, GO:0009058, GO:0016874	Reactome: R-HSA-196757, Reactome: R-HSA-196757, Reactome: R-HSA-196757, Reactome: R-HSA-196757,
scaffold_37873_1	1448389.BAVQ01000004_gene3712	1e-58	233												C	alcohol dehydrogenase	Gene3D, SUPERFAMILY, PANTHER, Gene3D	G3DSA:3.40.50.720, SSF51735, PTHR44154, G3DSA:3.90.180.10		IPR036291	NAD(P)-binding domain superfamily
scaffold_37917_1	1448389.BAVQ01000083_gene92	8.4e-12	75.5														NA	NA	NA	NA	NA	na	NA
scaffold_38014_1	1448389.BAVQ01000037_gene2046	6.5e-13	79	dtpT		ko:K03305					ko00000	2.A.17			E	amino acid peptide transporter	Gene3D, CDD	G3DSA:1.20.1250.20, cd17346	MFS_DtpA_like
scaffold_38014_2	1448389.BAVQ01000037_gene2047	7.3e-40	169.9												S	Protein of unknown function (DUF3054)	Pfam, TMHMM, TMHMM, TMHMM	PF11255, TMhelix, TMhelix, TMhelix	Protein of unknown function (DUF3054), Region of a membrane-bound protein predicted to be embedded in the membrane, Region of a membrane-bound protein predicted to be embedded in the membrane, Region of a membrane-bound protein predicted to be embedded in the membrane.	IPR021414	Protein of unknown function DUF3054
scaffold_38073_1	1095772.CAHH01000023_gene840	3.6e-43	181	cca	2.7.7.19,2.7.7.72	ko:K00970,ko:K00974	ko03013,ko03018,map03013,map03018		R09382,R09383,R09384,R09386	RC00078	ko00000,ko00001,ko01000,ko03016,ko03019				J	tRNA nucleotidyltransferase poly(A) polymerase	SUPERFAMILY, Coils	SSF81891, Coil
scaffold_3814_5	78345.BMERY_0816	4.3e-18	96.7		3.2.2.10	ko:K06966	ko00230,ko00240,map00230,map00240		R00182,R00510	RC00063,RC00318	ko00000,ko00001,ko01000				F	belongs to the nudix hydrolase family	NA	NA	NA	NA	NA	na	NA
scaffold_38155_1	1095772.CAHH01000043_gene1169	1.4e-39	169.5												A	Belongs to the DEAD box helicase family	MobiDBLite, MobiDBLite	mobidb-lite, mobidb-lite	consensus disorder prediction, consensus disorder prediction
scaffold_38355_1	285514.JNWO01000012_gene6578	1.1e-17	96.7												T	Histidine kinase	Gene3D	G3DSA:3.30.450.40		IPR029016	GAF-like domain superfamily
scaffold_38361_1	1448389.BAVQ01000022_gene1639	3.1e-64	251.1												S	Belongs to the sodium solute symporter (SSF) (TC 2.A.21) family	PANTHER, TMHMM, Pfam, TMHMM, ProSiteProfiles, TMHMM, PANTHER, Gene3D, TMHMM	PTHR43291:SF2, TMhelix, PF00474, TMhelix, PS50283, TMhelix, PTHR43291, G3DSA:1.20.1730.10, TMhelix	Region of a membrane-bound protein predicted to be embedded in the membrane, Sodium:solute symporter family, Region of a membrane-bound protein predicted to be embedded in the membrane, Sodium:solute symporter family profile, Region of a membrane-bound protein predicted to be embedded in the membrane, Region of a membrane-bound protein predicted to be embedded in the membrane.	IPR001734, IPR001734, IPR038377	Sodium/solute symporter, Sodium/solute symporter, Sodium/glucose symporter superfamily	GO:0016020, GO:0022857, GO:0055085, GO:0016020, GO:0022857, GO:0055085
scaffold_38482_1	1120947.ATUX01000001_gene2001	4.2e-25	121.3												S	tape measure	NA	NA	NA	NA	NA	na	NA
scaffold_38584_1	1448389.BAVQ01000003_gene3659	9.9e-75	286.2	tig		ko:K03545					ko00000				D	Involved in protein export. Acts as a chaperone by maintaining the newly synthesized protein in an open conformation. Functions as a peptidyl-prolyl cis-trans isomerase	SUPERFAMILY, Gene3D, Pfam, Gene3D, SUPERFAMILY, Coils, Pfam, PANTHER	SSF109998, G3DSA:3.10.50.40, PF05698, G3DSA:1.10.3120.10, SSF54534, Coil, PF00254, PTHR30560	Bacterial trigger factor protein (TF) C-terminus, FKBP-type peptidyl-prolyl cis-trans isomerase	IPR027304, IPR008880, IPR037041, IPR001179, IPR005215	Trigger factor/SurA domain superfamily, Trigger factor, C-terminal, Trigger factor, C-terminal domain superfamily, FKBP-type peptidyl-prolyl cis-trans isomerase domain, Trigger factor	GO:0005575, GO:0005618, GO:0005622, GO:0005623, GO:0005737, GO:0005829, GO:0005886, GO:0006950, GO:0007154, GO:0008150, GO:0009267, GO:0009605, GO:0009987, GO:0009991, GO:0016020, GO:0030312, GO:0031667, GO:0031668, GO:0031669, GO:0033554, GO:0042221, GO:0042594, GO:0044424, GO:0044444, GO:0044464, GO:0046677, GO:0050896, GO:0051716, GO:0071496, GO:0071944GO:0006457, GO:0015031, GO:0006457, GO:00…
scaffold_38616_1	1448389.BAVQ01000007_gene4291	3.7e-90	337.4	sucA	1.2.4.2,4.1.1.71	ko:K00164,ko:K01616	ko00020,ko00310,ko00380,ko01100,ko01110,ko01120,ko01130,ko01200,map00020,map00310,map00380,map01100,map01110,map01120,map01130,map01200	M00009,M00011,M00032	R00621,R01933,R01940,R03316,R08549	RC00004,RC00027,RC00627,RC02743,RC02833,RC02883	br01601,ko00000,ko00001,ko00002,ko01000			iNJ661.Rv1248c,iSSON_1240.SSON_0677,iYL1228.KPN_00732	C	Dehydrogenase E1 component	SUPERFAMILY, Gene3D, PANTHER, PANTHER, Pfam	SSF52518, G3DSA:3.40.50.12470, PTHR23152, PTHR23152:SF22, PF02779	Transketolase, pyrimidine binding domain	IPR029061, IPR011603, IPR005475	Thiamin diphosphate-binding fold, 2-oxoglutarate dehydrogenase E1 component, Transketolase-like, pyrimidine-binding domain	GO:0000287, GO:0003674, GO:0003824, GO:0004591, GO:0005488, GO:0005515, GO:0005575, GO:0005618, GO:0005622, GO:0005623, GO:0005737, GO:0005829, GO:0005886, GO:0006082, GO:0006091, GO:0006099, GO:0006101, GO:0006103, GO:0008150, GO:0008152, GO:0008683, GO:0009055, GO:0009060, GO:0009987, GO:0015980, GO:0016020, GO:0016491, GO:0016624, GO:0016740, GO:0016744, GO:0016829, GO:0016830, GO:0016831, GO:…	KEGG: 00020+1.2.4.2, KEGG: 00310+1.2.4.2, KEGG: 00380+1.2.4.2, MetaCyc: PWY-5084,
scaffold_38748_1	1095772.CAHH01000055_gene1653	8.3e-35	153.3	ileS	6.1.1.5	ko:K01870	ko00970,map00970	M00359,M00360	R03656	RC00055,RC00523	ko00000,ko00001,ko00002,ko01000,ko01007,ko03016				J	amino acids such as valine, to avoid such errors it has two additional distinct tRNA(Ile)-dependent editing activities. One activity is designated as pretransfer editing and involves the hydrolysis of activated Val-AMP. The other activity is designated posttransfer editing and involves deacylation of mischarged Val-tRNA(Ile)	NA	NA	NA	NA	NA	GO:0003674, GO:0003824, GO:0004812, GO:0004822, GO:0005575, GO:0005618, GO:0005622, GO:0005623, GO:0005737, GO:0005886, GO:0006082, GO:0006139, GO:0006399, GO:0006412, GO:0006418, GO:0006428, GO:0006518, GO:0006520, GO:0006725, GO:0006807, GO:0008150, GO:0008152, GO:0009058, GO:0009059, GO:0009987, GO:0010467, GO:0016020, GO:0016070, GO:0016874, GO:0016875, GO:0019538, GO:0019752, GO:0030312, GO:…	NA
scaffold_38831_1	1077144.AGFF01000018_gene1546	9.2e-73	279.6		4.1.3.4,4.1.3.46	ko:K01640,ko:K18314	ko00072,ko00280,ko00281,ko00650,ko01100,ko04146,map00072,map00280,map00281,map00650,map01100,map04146	M00036,M00088	R01360,R08090,R10674	RC00502,RC00503,RC01118,RC01205,RC01946	ko00000,ko00001,ko00002,ko01000				E	Hydroxymethylglutaryl-CoA lyase	Gene3D, PANTHER, PANTHER, Pfam, SUPERFAMILY, ProSiteProfiles	G3DSA:3.20.20.70, PTHR42738, PTHR42738:SF7, PF00682, SSF51569, PS50991	HMGL-like, Pyruvate carboxyltransferase domain.	IPR013785, IPR000891, IPR000891	Aldolase-type TIM barrel, Pyruvate carboxyltransferase, Pyruvate carboxyltransferase	GO:0003674, GO:0003824, GO:0006081, GO:0006082, GO:0008150, GO:0008152, GO:0009056, GO:0009436, GO:0009987, GO:0015977, GO:0016054, GO:0016829, GO:0016830, GO:0016833, GO:0019752, GO:0032787, GO:0043427, GO:0043436, GO:0044237, GO:0044248, GO:0044281, GO:0044282, GO:0046185, GO:0046395, GO:0046487, GO:0071704, GO:0072329, GO:1901575GO:0003824, GO:0003824, GO:0003824
scaffold_38833_2	888439.HMPREF9240_01932	3e-08	63.9														NA	NA	NA	NA	NA	na	NA
scaffold_38857_1	1448389.BAVQ01000023_gene1383	1.2e-72	279.3	mfd		ko:K03723	ko03420,map03420				ko00000,ko00001,ko01000,ko03400				L	Couples transcription and DNA repair by recognizing RNA polymerase (RNAP) stalled at DNA lesions. Mediates ATP-dependent release of RNAP and its truncated transcript from the DNA, and recruitment of nucleotide excision repair machinery to the damaged site	SUPERFAMILY, Coils	SSF52540, Coil		IPR027417	P-loop containing nucleoside triphosphate hydrolase	GO:0005575, GO:0005622, GO:0005623, GO:0005737, GO:0005829, GO:0005886, GO:0016020, GO:0044424, GO:0044444, GO:0044464, GO:0071944
scaffold_38873_1	1448389.BAVQ01000057_gene2761	8.9e-52	209.9	helZ	2.7.11.1	ko:K08282					ko00000,ko01000				L	helicase	NA	NA	NA	NA	NA	na	NA
scaffold_38874_1	1448389.BAVQ01000070_gene2309	3e-21	107.5												IQ	Short-chain dehydrogenase reductase sdr	PANTHER, PANTHER, SUPERFAMILY, Pfam, Gene3D	PTHR42760:SF75, PTHR42760, SSF51735, PF00106, G3DSA:3.40.50.720	short chain dehydrogenase	IPR036291, IPR002347	NAD(P)-binding domain superfamily, Short-chain dehydrogenase/reductase SDR
scaffold_38897_1	1448389.BAVQ01000070_gene2197	7.3e-41	172.9												P	P-aminobenzoate N-oxygenase AurF	Pfam	PF11583	P-aminobenzoate N-oxygenase AurF	IPR025859	P-aminobenzoate N-oxygenase AurF
scaffold_38977_1	1448389.BAVQ01000090_gene2061	1.3e-87	328.9	cobN	6.6.1.2	ko:K02230	ko00860,ko01100,map00860,map01100		R05227	RC02000	ko00000,ko00001,ko01000			iNJ661.Rv2062c	H	cobaltochelatase CobN subunit	Pfam, PANTHER, PANTHER	PF02514, PTHR44119:SF4, PTHR44119	CobN/Magnesium Chelatase	IPR003672	CobN/magnesium chelatase	GO:0009058
scaffold_39094_1	1448389.BAVQ01000035_gene759	5e-55	220.7	atfA1	2.3.1.20	ko:K00635	ko00561,ko01100,map00561,map01100	M00089	R02251	RC00004,RC00041	ko00000,ko00001,ko00002,ko01000				I	Belongs to the long-chain O-acyltransferase family	Pfam, Pfam, PANTHER, PANTHER	PF03007, PF06974, PTHR31650:SF1, PTHR31650	Wax ester synthase-like Acyl-CoA acyltransferase domain, Protein of unknown function (DUF1298)	IPR004255, IPR009721	O-acyltransferase, WSD1, N-terminal, O-acyltransferase WSD1, C-terminal	GO:0004144, GO:0045017, GO:0004144	KEGG: 00073+2.3.1.20, KEGG: 00561+2.3.1.20, KEGG: 00073+2.3.1.20, KEGG: 00561+2.3.1.20,
scaffold_39168_1	1121927.GOHSU_25_00450	7.3e-30	137.1												K	helix_turn_helix, arabinose operon control protein	PANTHER, Pfam, PANTHER	PTHR43280:SF5, PF14525, PTHR43280	AraC-binding-like domain	IPR035418	Transcription regulator HTH, AraC- type, ligand binding domain-like
scaffold_39171_1	1448389.BAVQ01000003_gene3442	1.6e-60	238.8	ileS	6.1.1.5	ko:K01870	ko00970,map00970	M00359,M00360	R03656	RC00055,RC00523	ko00000,ko00001,ko00002,ko01000,ko01007,ko03016				J	amino acids such as valine, to avoid such errors it has two additional distinct tRNA(Ile)-dependent editing activities. One activity is designated as pretransfer editing and involves the hydrolysis of activated Val-AMP. The other activity is designated posttransfer editing and involves deacylation of mischarged Val-tRNA(Ile)	NA	NA	NA	NA	NA	GO:0003674, GO:0003824, GO:0004812, GO:0004822, GO:0005575, GO:0005618, GO:0005622, GO:0005623, GO:0005737, GO:0005886, GO:0006082, GO:0006139, GO:0006399, GO:0006412, GO:0006418, GO:0006428, GO:0006518, GO:0006520, GO:0006725, GO:0006807, GO:0008150, GO:0008152, GO:0009058, GO:0009059, GO:0009987, GO:0010467, GO:0016020, GO:0016070, GO:0016874, GO:0016875, GO:0019538, GO:0019752, GO:0030312, GO:…	NA
scaffold_39221_1	1448389.BAVQ01000023_gene1400	5.2e-31	139.8		1.3.99.5	ko:K16051	ko00984,ko01120,map00984,map01120		R01834	RC00145	ko00000,ko00001,ko01000				C	succinate dehydrogenase fumarate reductase, flavoprotein subunit	Pfam, PANTHER, PANTHER, Gene3D, SUPERFAMILY	PF00890, PTHR43400, PTHR43400:SF7, G3DSA:3.50.50.60, SSF51905	FAD binding domain	IPR003953, IPR036188, IPR036188	FAD-dependent oxidoreductase 2, FAD binding domain, FAD/NAD(P)-binding domain superfamily, FAD/NAD(P)-binding domain superfamily		Reactome: R-HSA-611105, Reactome: R-HSA-71403,
scaffold_39239_1	1095772.CAHH01000059_gene1421	5.4e-53	213.8	dnaE	2.7.7.7	ko:K02337	ko00230,ko00240,ko01100,ko03030,ko03430,ko03440,map00230,map00240,map01100,map03030,map03430,map03440	M00260	R00375,R00376,R00377,R00378	RC02795	ko00000,ko00001,ko00002,ko01000,ko03032,ko03400				L	DNA polymerase involved in damage-induced mutagenesis and translesion synthesis (TLS). It is not the major replicative DNA polymerase	CDD, Pfam, PANTHER, PANTHER	cd04485, PF01336, PTHR32294:SF0, PTHR32294	DnaE_OBF, OB-fold nucleic acid binding domain	IPR004365, IPR004805	OB-fold nucleic acid binding domain, AA-tRNA synthetase-type, DNA polymerase III, alpha subunit	GO:0003676, GO:0006260, GO:0008408
scaffold_39251_1	1448389.BAVQ01000070_gene2269	8.1e-27	126.3			ko:K08372	ko02020,map02020				ko00000,ko00001,ko01000,ko01002				O	serine protease	SignalP_GRAM_POSITIVE, SignalP_EUK, CDD	SignalP-TM, SignalP-noTM, cd04600	CBS_pair_HPP_assoc
scaffold_39251_2	1448389.BAVQ01000070_gene2271	1.3e-21	108.2												I	lipid kinase activity	NA	NA	NA	NA	NA	na	NA
scaffold_39260_2	1095772.CAHH01000009_gene2128	3.4e-15	87.4	radA		ko:K04485					ko00000,ko03400				O	DNA-dependent ATPase involved in processing of recombination intermediates, plays a role in repairing DNA breaks. Stimulates the branch migration of RecA-mediated strand transfer reactions, allowing the 3 invading strand to extend heteroduplex DNA faster. Binds ssDNA in the presence of ADP but not other nucleotides, has ATPase activity that is stimulated by ssDNA and various branched DNA structur…	SUPERFAMILY, Gene3D	SSF54211, G3DSA:3.30.230.10		IPR020568, IPR014721	Ribosomal protein S5 domain 2-type fold, Ribosomal protein S5 domain 2-type fold, subgroup	GO:0000725, GO:0003674, GO:0003676, GO:0003677, GO:0003697, GO:0003824, GO:0005488, GO:0005575, GO:0005622, GO:0005623, GO:0005737, GO:0005829, GO:0006139, GO:0006259, GO:0006281, GO:0006310, GO:0006725, GO:0006807, GO:0006950, GO:0006974, GO:0008094, GO:0008150, GO:0008152, GO:0009314, GO:0009628, GO:0009987, GO:0016462, GO:0016787, GO:0016817, GO:0016818, GO:0016887, GO:0017111, GO:0033554, GO:…
scaffold_39264_1	1448389.BAVQ01000071_gene2474	2.9e-79	301.2	glpQ	3.1.4.46	ko:K01126	ko00564,map00564		R01030,R01470	RC00017,RC00425	ko00000,ko00001,ko01000				C	glycerophosphoryl diester phosphodiesterase	ProSiteProfiles, PANTHER, PANTHER, Pfam, SUPERFAMILY, Gene3D	PS51704, PTHR46211:SF7, PTHR46211, PF03009, SSF51695, G3DSA:3.20.20.190	GP-PDE domain profile, Glycerophosphoryl diester phosphodiesterase family	IPR030395, IPR030395, IPR017946, IPR017946	Glycerophosphodiester phosphodiesterase domain, Glycerophosphodiester phosphodiesterase domain, PLC-like phosphodiesterase, TIM beta/alpha-barrel domain superfamily, PLC-like phosphodiesterase, TIM beta/alpha-barrel domain superfamily	GO:0006629, GO:0008081, GO:0006629, GO:0008081, GO:0006629, GO:0008081, GO:0006629, GO:0008081
scaffold_39347_1	1448389.BAVQ01000043_gene1802	1.6e-35	154.8	nrdE	1.17.4.1	ko:K00525	ko00230,ko00240,ko01100,map00230,map00240,map01100	M00053	R02017,R02018,R02019,R02024	RC00613	ko00000,ko00001,ko00002,ko01000,ko03400			iAPECO1_1312.APECO1_3846,iYO844.BSU17380	F	Provides the precursors necessary for DNA synthesis. Catalyzes the biosynthesis of deoxyribonucleotides from the corresponding ribonucleotides	PANTHER, SUPERFAMILY, Gene3D, Pfam, PANTHER	PTHR11573:SF19, SSF51998, G3DSA:3.20.70.20, PF02867, PTHR11573	Ribonucleotide reductase, barrel domain	IPR000788, IPR039718	Ribonucleotide reductase large subunit, C-terminal, Ribonucleoside-diphosphate reductase large subunit	GO:0000166, GO:0003674, GO:0003824, GO:0004748, GO:0005488, GO:0005524, GO:0005575, GO:0005622, GO:0005623, GO:0005737, GO:0005829, GO:0005886, GO:0005971, GO:0006139, GO:0006259, GO:0006260, GO:0006725, GO:0006753, GO:0006793, GO:0006796, GO:0006807, GO:0008144, GO:0008150, GO:0008152, GO:0009058, GO:0009059, GO:0009117, GO:0009165, GO:0009262, GO:0009263, GO:0009987, GO:0015949, GO:0016020, GO:…	KEGG: 00230+1.17.4.1, KEGG: 00240+1.17.4.1, KEGG: 00480+1.17.4.1, KEGG: 00983+1.17.4.1, MetaCyc: PWY-6545, MetaCyc: PWY-7184, MetaCyc: PWY-7198, MetaCyc: PWY-7210, MetaCyc: PWY-7220, MetaCyc: PWY-7222, MetaCyc: PWY-7226, MetaCyc: PWY-7227, Reactome: R-HSA-499943, KEGG: 00230+1.17.4.1, KEGG: 00240+1.17.4.1, KEGG: 00480+1.17.4.1, KEGG: 00983+1.17.4.1, MetaCyc: PWY-6545, MetaCyc: PWY-7184, MetaCyc: …
scaffold_39450_1	1448389.BAVQ01000043_gene1917	6.1e-69	266.9	fadD3	6.2.1.41	ko:K18687	ko00984,ko01100,ko01120,map00984,map01100,map01120		R10769	RC00004,RC00014	ko00000,ko00001,ko01000				IQ	PFAM AMP-dependent synthetase and ligase	PANTHER, SUPERFAMILY, Pfam, CDD, ProSitePatterns, Gene3D	PTHR24096, SSF56801, PF00501, cd17638, PS00455, G3DSA:3.40.50.12780	AMP-binding enzyme, FadD3, Putative AMP-binding domain signature.	IPR000873, IPR020845, IPR042099	AMP-dependent synthetase/ligase, AMP-binding, conserved site, AMP-dependent synthetase-like superfamily	GO:0003674, GO:0005488, GO:0005515, GO:0005575, GO:0005622, GO:0005623, GO:0005737, GO:0005777, GO:0042579, GO:0043226, GO:0043227, GO:0043229, GO:0043231, GO:0044424, GO:0044444, GO:0044464, GO:0051087GO:0003824
scaffold_39491_1	1448389.BAVQ01000090_gene2084	8.5e-79	299.7												C	PFAM fumarate reductase succinate dehydrogenase flavoprotein domain protein	Pfam, PANTHER, SUPERFAMILY, Gene3D, PANTHER, Gene3D	PF00890, PTHR43400, SSF51905, G3DSA:3.50.50.60, PTHR43400:SF7, G3DSA:3.90.700.10	FAD binding domain	IPR003953, IPR036188, IPR036188, IPR027477	FAD-dependent oxidoreductase 2, FAD binding domain, FAD/NAD(P)-binding domain superfamily, FAD/NAD(P)-binding domain superfamily, Succinate dehydrogenase/fumarate reductase flavoprotein, catalytic domain superfamily		Reactome: R-HSA-611105, Reactome: R-HSA-71403, Reactome: R-HSA-611105, Reactome: R-HSA-71403
scaffold_39528_1	1448389.BAVQ01000036_gene844	3e-68	264.6	nhaA		ko:K03313					ko00000,ko02000	2.A.33.1			P	Na( ) H( ) antiporter that extrudes sodium in exchange for external protons	Pfam, Gene3D, PANTHER, TMHMM, ProSiteProfiles, TMHMM, TMHMM, TMHMM, TMHMM	PF06965, G3DSA:1.20.1530.10, PTHR30341, TMhelix, PS50262, TMhelix, TMhelix, TMhelix, TMhelix	Na+/H+ antiporter 1, Region of a membrane-bound protein predicted to be embedded in the membrane, G-protein coupled receptors family 1 profile, Region of a membrane-bound protein predicted to be embedded in the membrane, Region of a membrane-bound protein predicted to be embedded in the membrane, Region of a membrane-bound protein predicted to be embedded in the membrane, Region of a membrane-bou…	IPR004670, IPR023171, IPR004670, IPR017452	Na+/H+ antiporter NhaA, Na/H antiporter domain superfamily, Na+/H+ antiporter NhaA, GPCR, rhodopsin-like, 7TM	GO:0006814, GO:0006885, GO:0016021, GO:0006814, GO:0006885, GO:0016021, GO:0016021
scaffold_39556_1	1448389.BAVQ01000090_gene2106	5.3e-73	280.4												IQ	Belongs to the short-chain dehydrogenases reductases (SDR) family	PRINTS, PRINTS, PRINTS, PANTHER, PANTHER, Pfam, Gene3D, PRINTS, PRINTS, PRINTS, SUPERFAMILY, ProSitePatterns	PR00080, PR00080, PR00080, PTHR43658:SF6, PTHR43658, PF00106, G3DSA:3.40.50.720, PR00081, PR00081, PR00081, SSF51735, PS00061	Short-chain dehydrogenase/reductase (SDR) superfamily signature, Short-chain dehydrogenase/reductase (SDR) superfamily signature, Short-chain dehydrogenase/reductase (SDR) superfamily signature, short chain dehydrogenase, Glucose/ribitol dehydrogenase family signature, Glucose/ribitol dehydrogenase family signature, Glucose/ribitol dehydrogenase family signature, Short-chain dehydrogenases/reduct…	IPR002347, IPR002347, IPR002347, IPR002347, IPR002347, IPR002347, IPR002347, IPR036291, IPR020904	Short-chain dehydrogenase/reductase SDR, Short-chain dehydrogenase/reductase SDR, Short-chain dehydrogenase/reductase SDR, Short-chain dehydrogenase/reductase SDR, Short-chain dehydrogenase/reductase SDR, Short-chain dehydrogenase/reductase SDR, Short-chain dehydrogenase/reductase SDR, NAD(P)-binding domain superfamily, Short-chain dehydrogenase/reductase, conserved site	GO:0016491
scaffold_39565_1	446469.Sked_34090	1e-28	132.5	purF	2.4.2.14	ko:K00764	ko00230,ko00250,ko01100,ko01110,ko01130,map00230,map00250,map01100,map01110,map01130	M00048	R01072	RC00010,RC02724,RC02752	ko00000,ko00001,ko00002,ko01000,ko01002				F	Catalyzes the formation of phosphoribosylamine from phosphoribosylpyrophosphate (PRPP) and glutamine	SUPERFAMILY, Gene3D, MobiDBLite, Gene3D	SSF53271, G3DSA:3.60.20.10, mobidb-lite, G3DSA:3.40.50.2020	consensus disorder prediction	IPR029057, IPR029055	Phosphoribosyltransferase-like, Nucleophile aminohydrolases, N-terminal	GO:0005575, GO:0005622, GO:0005623, GO:0005737, GO:0008150, GO:0009507, GO:0009536, GO:0040007, GO:0043226, GO:0043227, GO:0043229, GO:0043231, GO:0044424, GO:0044444, GO:0044464
scaffold_39565_2	1095772.CAHH01000075_gene1550	3.3e-23	113.6	purM	6.3.3.1,6.3.4.13	ko:K01933,ko:K11788	ko00230,ko01100,ko01110,ko01130,map00230,map01100,map01110,map01130	M00048	R04144,R04208	RC00090,RC00166,RC01100	ko00000,ko00001,ko00002,ko01000			iAF987.Gmet_1844,iECSF_1327.ECSF_2340	F	Phosphoribosylformylglycinamidine cyclo-ligase	Gene3D, SUPERFAMILY	G3DSA:3.30.1330.10, SSF55326		IPR036921, IPR036921	PurM-like, N-terminal domain superfamily, PurM-like, N-terminal domain superfamily	GO:0003674, GO:0003824, GO:0004641, GO:0005575, GO:0005622, GO:0005623, GO:0005737, GO:0005829, GO:0006139, GO:0006163, GO:0006164, GO:0006725, GO:0006753, GO:0006793, GO:0006796, GO:0006807, GO:0008150, GO:0008152, GO:0009058, GO:0009117, GO:0009150, GO:0009152, GO:0009165, GO:0009259, GO:0009260, GO:0009987, GO:0016874, GO:0016879, GO:0016882, GO:0018130, GO:0019438, GO:0019637, GO:0019693, GO:…
scaffold_39616_1	888050.HMPREF9004_1978	1.7e-29	135.6		2.7.7.7	ko:K02342	ko00230,ko00240,ko01100,ko03030,ko03430,ko03440,map00230,map00240,map01100,map03030,map03430,map03440	M00260	R00375,R00376,R00377,R00378	RC02795	ko00000,ko00001,ko00002,ko01000,ko03032,ko03400				L	Transposase and inactivated derivatives	NA	NA	NA	NA	NA	na	NA
scaffold_39783_1	1448389.BAVQ01000006_gene3279	3.4e-72	277.7		3.1.1.45	ko:K01061	ko00361,ko00364,ko00623,ko01100,ko01110,ko01120,ko01130,map00361,map00364,map00623,map01100,map01110,map01120,map01130		R03893,R05510,R05511,R06835,R06838,R08120,R08121,R09136,R09220,R09222	RC01018,RC01906,RC01907,RC02441,RC02467,RC02468,RC02674,RC02675,RC02686	ko00000,ko00001,ko01000				Q	Dienelactone hydrolase	SUPERFAMILY, PANTHER, Pfam, Gene3D, PANTHER	SSF53474, PTHR46623:SF3, PF01738, G3DSA:3.40.50.1820, PTHR46623	Dienelactone hydrolase family	IPR029058, IPR002925, IPR029058	Alpha/Beta hydrolase fold, Dienelactone hydrolase, Alpha/Beta hydrolase fold	GO:0016787
scaffold_39802_1	1064537.AGSO01000011_gene3026	4.7e-45	187.6												K	Fusaric acid resistance protein-like	TMHMM, TMHMM, TMHMM, TMHMM, TMHMM	TMhelix, TMhelix, TMhelix, TMhelix, TMhelix	Region of a membrane-bound protein predicted to be embedded in the membrane, Region of a membrane-bound protein predicted to be embedded in the membrane, Region of a membrane-bound protein predicted to be embedded in the membrane, Region of a membrane-bound protein predicted to be embedded in the membrane, Region of a membrane-bound protein predicted to be embedded in the membrane.
scaffold_39824_1	1077144.AGFF01000007_gene1725	2e-14	84.3	bioF	2.3.1.29,2.3.1.47	ko:K00639,ko:K00652	ko00260,ko00780,ko01100,map00260,map00780,map01100	M00123,M00573,M00577	R00371,R03210,R10124	RC00004,RC00039,RC00394,RC02725	ko00000,ko00001,ko00002,ko01000,ko01007			iJN678.bioF,iNJ661.Rv1569	E	Catalyzes the cleavage of 2-amino-3-ketobutyrate to glycine and acetyl-CoA	Gene3D	G3DSA:3.90.1150.10		IPR015422	Pyridoxal phosphate-dependent transferase domain 1	GO:0003674, GO:0003824, GO:0005488, GO:0005575, GO:0005618, GO:0005623, GO:0005886, GO:0006082, GO:0006732, GO:0006766, GO:0006767, GO:0006768, GO:0006790, GO:0006807, GO:0008144, GO:0008150, GO:0008152, GO:0008710, GO:0009058, GO:0009102, GO:0009108, GO:0009110, GO:0009987, GO:0016020, GO:0016053, GO:0016740, GO:0016746, GO:0016747, GO:0017144, GO:0018130, GO:0019752, GO:0019842, GO:0030170, GO:…
scaffold_39824_2	1077144.AGFF01000007_gene1724	5.4e-34	150.2	bioD	2.3.1.47,6.3.3.3	ko:K00652,ko:K01935	ko00780,ko01100,map00780,map01100	M00123,M00573,M00577	R03182,R03210,R10124	RC00004,RC00039,RC00868,RC02725	ko00000,ko00001,ko00002,ko01000,ko01007				H	Catalyzes a mechanistically unusual reaction, the ATP- dependent insertion of CO2 between the N7 and N8 nitrogen atoms of 7,8-diaminopelargonic acid (DAPA) to form an ureido ring	Pfam, PANTHER, CDD, SUPERFAMILY, PANTHER, Gene3D	PF13500, PTHR43210, cd03109, SSF52540, PTHR43210:SF2, G3DSA:3.40.50.300	AAA domain, DTBS	IPR004472, IPR027417	Dethiobiotin synthase BioD, P-loop containing nucleoside triphosphate hydrolase	GO:0000166, GO:0000287, GO:0003674, GO:0003824, GO:0004141, GO:0005488, GO:0005524, GO:0005575, GO:0005622, GO:0005623, GO:0005737, GO:0005829, GO:0006082, GO:0006732, GO:0006766, GO:0006767, GO:0006768, GO:0006790, GO:0006807, GO:0008144, GO:0008150, GO:0008152, GO:0009058, GO:0009102, GO:0009108, GO:0009110, GO:0009987, GO:0016053, GO:0016874, GO:0016879, GO:0016882, GO:0017076, GO:0017144, GO:…	KEGG: 00780+6.3.3.3, MetaCyc: PWY-7380,
scaffold_39839_1	1448389.BAVQ01000003_gene3614	8.1e-82	309.7	ddh	1.4.1.16	ko:K03340	ko00300,ko01100,ko01110,ko01230,map00300,map01100,map01110,map01230	M00526	R02755	RC00006	ko00000,ko00001,ko00002,ko01000				E	Catalyzes the reversible NADPH-dependent reductive amination of L-2-amino-6-oxopimelate, the acyclic form of L- tetrahydrodipicolinate, to generate the meso compound, D,L-2,6- diaminopimelate	Gene3D, SUPERFAMILY, Gene3D, Pfam, TIGRFAM	G3DSA:3.30.360.10, SSF55347, G3DSA:3.40.50.720, PF16654, TIGR01921	Diaminopimelic acid dehydrogenase C-terminal domain, DAP-DH: diaminopimelate dehydrogenase	IPR032094, IPR010190	Meso-diaminopimelate D-dehydrogenase, C-terminal, Diaminopimelate dehydrogenase, Ddh	GO:0009089, GO:0047850	KEGG: 00300+1.4.1.16, MetaCyc: PWY-2942, KEGG: 00300+1.4.1.16, MetaCyc: PWY-2942
scaffold_39873_1	1448389.BAVQ01000016_gene4067	7.2e-61	240	pstA		ko:K02037,ko:K02038	ko02010,map02010	M00222			ko00000,ko00001,ko00002,ko02000	3.A.1.7		iJN746.PP_2658,iPC815.YPO4115,iYL1228.KPN_04131,iZ_1308.Z5217	P	phosphate transport system permease	ProSiteProfiles, PANTHER, TMHMM, TMHMM, Gene3D, TMHMM, SUPERFAMILY, TMHMM	PS50928, PTHR42922, TMhelix, TMhelix, G3DSA:1.10.3720.10, TMhelix, SSF161098, TMhelix	ABC transporter integral membrane type-1 domain profile, Region of a membrane-bound protein predicted to be embedded in the membrane, Region of a membrane-bound protein predicted to be embedded in the membrane, Region of a membrane-bound protein predicted to be embedded in the membrane, Region of a membrane-bound protein predicted to be embedded in the membrane.	IPR000515, IPR035906, IPR035906	ABC transporter type 1, transmembrane domain MetI-like, MetI-like superfamily, MetI-like superfamily	GO:0003674, GO:0005215, GO:0005315, GO:0005575, GO:0005623, GO:0005886, GO:0005887, GO:0006810, GO:0006811, GO:0006817, GO:0006820, GO:0006950, GO:0006974, GO:0008150, GO:0009987, GO:0010921, GO:0015291, GO:0015318, GO:0015698, GO:0016020, GO:0016021, GO:0019220, GO:0019222, GO:0022804, GO:0022857, GO:0031224, GO:0031226, GO:0031323, GO:0033554, GO:0034220, GO:0035303, GO:0035435, GO:0044425, GO:…
scaffold_39925_1	1077144.AGFF01000020_gene829	2.4e-69	268.1	rplO		ko:K02876	ko03010,map03010	M00178,M00179			br01610,ko00000,ko00001,ko00002,ko03011				J	binds to the 23S rRNA	PANTHER, SUPERFAMILY, Pfam, MobiDBLite, Hamap, MobiDBLite, PANTHER, TIGRFAM, Gene3D	PTHR12934, SSF52080, PF00828, mobidb-lite, MF_01341, mobidb-lite, PTHR12934:SF11, TIGR01071, G3DSA:3.100.10.10	Ribosomal proteins 50S-L15, 50S-L18e, 60S-L27A, consensus disorder prediction, 50S ribosomal protein L15 [rplO], consensus disorder prediction, rplO_bact: ribosomal protein uL15	IPR005749, IPR036227, IPR021131, IPR030878, IPR005749	Ribosomal protein L15, bacterial-type, Ribosomal L18e/L15P superfamily, Ribosomal protein L18e/L15P, Ribosomal protein L15, Ribosomal protein L15, bacterial-type	GO:0003674, GO:0003735, GO:0005198, GO:0005575, GO:0005622, GO:0005623, GO:0005737, GO:0005829, GO:0005840, GO:0005886, GO:0006412, GO:0006518, GO:0006807, GO:0008150, GO:0008152, GO:0009058, GO:0009059, GO:0009987, GO:0010467, GO:0015934, GO:0016020, GO:0019538, GO:0022625, GO:0022626, GO:0032991, GO:0034641, GO:0034645, GO:0043043, GO:0043170, GO:0043226, GO:0043228, GO:0043229, GO:0043232, GO:…	Reactome: R-HSA-5368286, Reactome: R-HSA-5389840, Reactome: R-HSA-5419276, Reactome: R-HSA-5368286, Reactome: R-HSA-5389840, Reactome: R-HSA-5419276,
scaffold_39946_1	1448389.BAVQ01000018_gene1187	1.8e-68	265.4		1.11.1.10	ko:K00433					ko00000,ko01000				I	Alpha beta hydrolase	SUPERFAMILY, Gene3D	SSF53474, G3DSA:3.40.50.1820		IPR029058, IPR029058	Alpha/Beta hydrolase fold, Alpha/Beta hydrolase fold
scaffold_39971_1	1448389.BAVQ01000043_gene1799	8.5e-71	273.1												S	Htaa	Pfam	PF04213	Htaa	IPR007331	Htaa
scaffold_39985_1	1095772.CAHH01000012_gene1943	1.9e-75	288.5	pgm	5.4.2.2	ko:K01835	ko00010,ko00030,ko00052,ko00230,ko00500,ko00520,ko00521,ko01100,ko01110,ko01120,ko01130,map00010,map00030,map00052,map00230,map00500,map00520,map00521,map01100,map01110,map01120,map01130	M00549	R00959,R01057,R08639	RC00408	ko00000,ko00001,ko00002,ko01000			iAPECO1_1312.APECO1_1376,iECED1_1282.ECED1_0670,iECNA114_1301.ECNA114_0627,iECOK1_1307.ECOK1_0699,iECP_1309.ECP_0709,iECS88_1305.ECS88_0725,iJN678.pgm,iLF82_1304.LF82_1632,iNRG857_1313.NRG857_03110,iUMN146_1321.UM146_14115,iYL1228.KPN_00711	G	Phosphoglucomutase	Pfam, SUPERFAMILY, Gene3D, PANTHER, Pfam, ProSitePatterns, PANTHER, Gene3D	PF02879, SSF53738, G3DSA:3.40.120.10, PTHR22573:SF57, PF02878, PS00710, PTHR22573, G3DSA:3.40.120.10	Phosphoglucomutase/phosphomannomutase, alpha/beta/alpha domain II, Phosphoglucomutase/phosphomannomutase, alpha/beta/alpha domain I, Phosphoglucomutase and phosphomannomutase phosphoserine signature.	IPR005845, IPR016055, IPR005844, IPR016066	Alpha-D-phosphohexomutase, alpha/beta/alpha domain II, Alpha-D-phosphohexomutase, alpha/beta/alpha I/II/III, Alpha-D-phosphohexomutase, alpha/beta/alpha domain I, Alpha-D-phosphohexomutase, conserved site	GO:0000271, GO:0003674, GO:0003824, GO:0004614, GO:0005575, GO:0005622, GO:0005623, GO:0005737, GO:0005829, GO:0005975, GO:0005976, GO:0005977, GO:0005978, GO:0005996, GO:0006006, GO:0006012, GO:0006073, GO:0006091, GO:0006112, GO:0008150, GO:0008152, GO:0009056, GO:0009058, GO:0009059, GO:0009250, GO:0009987, GO:0015980, GO:0016051, GO:0016052, GO:0016853, GO:0016866, GO:0016868, GO:0019318, GO:…	KEGG: 00520+5.4.2.10, MetaCyc: PWY-6749, KEGG: 00520+5.4.2.10, MetaCyc: PWY-6749, KEGG: 00520+5.4.2.10, MetaCyc: PWY-6749, KEGG: 00520+5.4.2.10, MetaCyc: PWY-6749,
scaffold_40033_1	1448389.BAVQ01000002_gene2906	1.5e-64	252.3	MA20_17250		ko:K02035	ko02024,map02024	M00239			ko00000,ko00001,ko00002,ko02000	3.A.1.5			E	Extracellular solute-binding protein, family 5	Gene3D, SUPERFAMILY, PANTHER, PANTHER	G3DSA:3.10.105.10, SSF53850, PTHR30290, PTHR30290:SF38		IPR039424	Solute-binding protein family 5
scaffold_40075_1	1448389.BAVQ01000043_gene1774	1.3e-63	249.2	fas	2.3.1.179	ko:K09458,ko:K11533	ko00061,ko00780,ko01100,ko01212,ko04931,map00061,map00780,map01100,map01212,map04931	M00082,M00083,M00572	R01624,R01626,R04355,R04428,R04429,R04533,R04534,R04535,R04536,R04537,R04543,R04544,R04566,R04568,R04724,R04726,R04952,R04953,R04954,R04955,R04957,R04958,R04960,R04961,R04963,R04964,R04965,R04966,R04968,R04969,R07762,R07763,R07764,R07765,R10115,R10119,R10700	RC00004,RC00029,RC00039,RC00052,RC00076,RC00117,RC00831,RC01095,RC02727,RC02728,RC02729,RC02857,RC02888	ko00000,ko00001,ko00002,ko01000,ko01004				I	capsule polysaccharide biosynthetic process	Gene3D, PANTHER, PANTHER	G3DSA:3.40.50.720, PTHR10982:SF23, PTHR10982
scaffold_40112_1	1448389.BAVQ01000013_gene3979	6.9e-73	280	dnaE2	2.7.7.6,2.7.7.7	ko:K00960,ko:K02337,ko:K14162	ko00230,ko00240,ko01100,ko03030,ko03430,ko03440,map00230,map00240,map01100,map03030,map03430,map03440	M00260	R00375,R00376,R00377,R00378	RC02795	ko00000,ko00001,ko00002,ko01000,ko03032,ko03400				L	DNA polymerase involved in damage-induced mutagenesis and translesion synthesis (TLS). It is not the major replicative DNA polymerase	Gene3D, Pfam, PANTHER, PANTHER	G3DSA:3.20.20.140, PF02811, PTHR32294, PTHR32294:SF4	PHP domain	IPR004013, IPR004805, IPR023073	PHP domain, DNA polymerase III, alpha subunit, DNA polymerase, error-prone	GO:0000731, GO:0003674, GO:0003824, GO:0003887, GO:0005575, GO:0005618, GO:0005623, GO:0005886, GO:0006139, GO:0006259, GO:0006260, GO:0006281, GO:0006301, GO:0006725, GO:0006807, GO:0006950, GO:0006974, GO:0007154, GO:0008150, GO:0008152, GO:0009058, GO:0009059, GO:0009432, GO:0009605, GO:0009987, GO:0009991, GO:0016020, GO:0016740, GO:0016772, GO:0016779, GO:0018130, GO:0019438, GO:0019985, GO:…
scaffold_40129_1	1095772.CAHH01000006_gene2250	2.3e-25	120.9	rpmC		ko:K02904	ko03010,map03010	M00178,M00179			br01610,ko00000,ko00001,ko00002,ko03011				J	Belongs to the universal ribosomal protein uL29 family	Hamap, PANTHER, Pfam, Gene3D, SUPERFAMILY, ProSitePatterns, TIGRFAM, CDD	MF_00374, PTHR10916, PF00831, G3DSA:1.10.287.310, SSF46561, PS00579, TIGR00012, cd00427	50S ribosomal protein L29 [rpmC], Ribosomal L29 protein, Ribosomal protein L29 signature, L29: ribosomal protein uL29, Ribosomal_L29_HIP	IPR001854, IPR001854, IPR036049, IPR018254, IPR001854	Ribosomal protein L29/L35, Ribosomal protein L29/L35, Ribosomal protein L29/L35 superfamily, Ribosomal protein L29, conserved site, Ribosomal protein L29/L35	GO:0000027, GO:0003674, GO:0003735, GO:0005198, GO:0005575, GO:0005622, GO:0005623, GO:0005737, GO:0005829, GO:0005840, GO:0006412, GO:0006518, GO:0006807, GO:0006996, GO:0008150, GO:0008152, GO:0009058, GO:0009059, GO:0009987, GO:0010467, GO:0015934, GO:0016043, GO:0019538, GO:0022607, GO:0022613, GO:0022618, GO:0022625, GO:0022626, GO:0032991, GO:0034622, GO:0034641, GO:0034645, GO:0040007, GO:…	Reactome: R-HSA-156827, Reactome: R-HSA-156902, Reactome: R-HSA-1799339, Reactome: R-HSA-192823, Reactome: R-HSA-2408557, Reactome: R-HSA-6791226, Reactome: R-HSA-72689, Reactome: R-HSA-72706, Reactome: R-HSA-72764, Reactome: R-HSA-9010553, Reactome: R-HSA-975956, Reactome: R-HSA-975957, Reactome: R-HSA-156827, Reactome: R-HSA-156902, Reactome: R-HSA-1799339, Reactome: R-HSA-192823, Reactome: R-H…
scaffold_40129_2	1095772.CAHH01000006_gene2249	1.5e-37	161.8	rpsQ		ko:K02961	ko03010,map03010	M00178,M00179			br01610,ko00000,ko00001,ko00002,ko03011				J	One of the primary rRNA binding proteins, it binds specifically to the 5-end of 16S ribosomal RNA	Hamap, PRINTS, PRINTS, PRINTS, PANTHER, SUPERFAMILY, Gene3D, TIGRFAM, Pfam, PANTHER, ProSitePatterns	MF_01345_B, PR00973, PR00973, PR00973, PTHR10744, SSF50249, G3DSA:2.40.50.140, TIGR03635, PF00366, PTHR10744:SF1, PS00056	30S ribosomal protein S17 [rpsQ], Ribosomal protein S17 family signature, Ribosomal protein S17 family signature, Ribosomal protein S17 family signature, uS17_bact: ribosomal protein uS17, Ribosomal protein S17, Ribosomal protein S17 signature.	IPR019984, IPR000266, IPR000266, IPR000266, IPR000266, IPR012340, IPR019984, IPR000266, IPR019979	30S ribosomal protein S17, Ribosomal protein S17/S11, Ribosomal protein S17/S11, Ribosomal protein S17/S11, Ribosomal protein S17/S11, Nucleic acid-binding, OB-fold, 30S ribosomal protein S17, Ribosomal protein S17/S11, Ribosomal protein S17, conserved site	GO:0003674, GO:0003735, GO:0005198, GO:0005575, GO:0005622, GO:0005623, GO:0005737, GO:0005829, GO:0005840, GO:0005886, GO:0006412, GO:0006518, GO:0006807, GO:0008150, GO:0008152, GO:0009058, GO:0009059, GO:0009987, GO:0010467, GO:0015935, GO:0016020, GO:0019538, GO:0022626, GO:0022627, GO:0032991, GO:0034641, GO:0034645, GO:0040007, GO:0043043, GO:0043170, GO:0043226, GO:0043228, GO:0043229, GO:…	Reactome: R-HSA-156827, Reactome: R-HSA-156902, Reactome: R-HSA-1799339, Reactome: R-HSA-192823, Reactome: R-HSA-2408557, Reactome: R-HSA-6791226, Reactome: R-HSA-72649, Reactome: R-HSA-72689, Reactome: R-HSA-72695, Reactome: R-HSA-72702, Reactome: R-HSA-72706, Reactome: R-HSA-72764, Reactome: R-HSA-9010553, Reactome: R-HSA-975956, Reactome: R-HSA-975957
scaffold_40131_2	1122622.ATWJ01000008_gene2958	1.5e-26	125.6												K	transcriptional regulator	NA	NA	NA	NA	NA	na	NA
scaffold_40136_1	1448389.BAVQ01000038_gene1953	1.1e-33	149.8												V	Beta-lactamase	PANTHER, Gene3D, PANTHER	PTHR43645, G3DSA:2.40.128.600, PTHR43645:SF6
scaffold_40178_1	1120933.ATUY01000023_gene1	8e-17	92														NA	NA	NA	NA	NA	na	NA
scaffold_40180_1	1077144.AGFF01000005_gene2191	5.8e-80	303.5		3.5.1.23	ko:K12349	ko00600,ko01100,ko04071,map00600,map01100,map04071	M00099	R01494	RC00064,RC00328	ko00000,ko00001,ko00002,ko01000				S	Neutral/alkaline non-lysosomal ceramidase, N-terminal	PANTHER, MobiDBLite, Pfam, PANTHER	PTHR12670, mobidb-lite, PF04734, PTHR12670:SF3	consensus disorder prediction, Neutral/alkaline non-lysosomal ceramidase, N-terminal	IPR006823, IPR031329	Neutral/alkaline nonlysosomal ceramidase, Neutral/alkaline non-lysosomal ceramidase, N-terminal	GO:0001676, GO:0003674, GO:0003824, GO:0005575, GO:0005618, GO:0005623, GO:0006066, GO:0006082, GO:0006629, GO:0006631, GO:0006633, GO:0006643, GO:0006665, GO:0006670, GO:0006672, GO:0006807, GO:0008150, GO:0008152, GO:0008610, GO:0009056, GO:0009058, GO:0009987, GO:0016042, GO:0016053, GO:0016787, GO:0016810, GO:0016811, GO:0017040, GO:0019751, GO:0019752, GO:0030148, GO:0030149, GO:0030312, GO:…	KEGG: 00600+3.5.1.23, MetaCyc: PWY-6483, MetaCyc: PWY-7119, KEGG: 00600+3.5.1.23, MetaCyc: PWY-6483, MetaCyc: PWY-7119, Reactome: R-HSA-1660662,
scaffold_40184_1	1095772.CAHH01000040_gene2412	2.5e-66	258.1	glgA	2.4.1.342	ko:K16148	ko00500,ko01100,map00500,map01100		R02421,R11530	RC00005,RC00049,RC02748	ko00000,ko00001,ko01000,ko01003		GT4		M	Catalyzes the transfer of a N-acetyl-glucosamine moiety to 1D-myo-inositol 3-phosphate to produce 1D-myo-inositol 2- acetamido-2-deoxy-glucopyranoside 3-phosphate in the mycothiol biosynthesis pathway	Gene3D, SUPERFAMILY, CDD, Pfam	G3DSA:3.40.50.2000, SSF53756, cd03801, PF13439	GT4_PimA-like, Glycosyltransferase Family 4	IPR028098	Glycosyltransferase subfamily 4-like, N-terminal domain		Reactome: R-HSA-446193, Reactome: R-HSA-4549349
scaffold_40246_1	1448389.BAVQ01000083_gene124	1.1e-78	299.3	fadA4	2.3.1.9	ko:K00626	ko00071,ko00072,ko00280,ko00310,ko00362,ko00380,ko00620,ko00630,ko00640,ko00650,ko00720,ko00900,ko01100,ko01110,ko01120,ko01130,ko01200,ko01212,ko02020,map00071,map00072,map00280,map00310,map00362,map00380,map00620,map00630,map00640,map00650,map00720,map00900,map01100,map01110,map01120,map01130,map01200,map01212,map02020	M00088,M00095,M00373,M00374,M00375	R00238,R01177	RC00004,RC00326	ko00000,ko00001,ko00002,ko01000,ko04147				I	Belongs to the thiolase family	PANTHER, PANTHER, SUPERFAMILY, Gene3D, Pfam, Pfam, SUPERFAMILY	PTHR18919:SF107, PTHR18919, SSF53901, G3DSA:3.40.47.10, PF02803, PF00108, SSF53901	Thiolase, C-terminal domain, Thiolase, N-terminal domain	IPR016039, IPR016039, IPR020617, IPR020616, IPR016039	Thiolase-like, Thiolase-like, Thiolase, C-terminal, Thiolase, N-terminal, Thiolase-like	GO:0003674, GO:0003824, GO:0003988, GO:0005575, GO:0005576, GO:0005623, GO:0005886, GO:0006082, GO:0006629, GO:0006631, GO:0006635, GO:0008150, GO:0008152, GO:0009056, GO:0009062, GO:0009605, GO:0009607, GO:0009987, GO:0016020, GO:0016042, GO:0016054, GO:0016408, GO:0016740, GO:0016746, GO:0016747, GO:0019395, GO:0019752, GO:0030258, GO:0032787, GO:0034440, GO:0043207, GO:0043436, GO:0044237, GO:…
scaffold_40249_2	471856.Jden_1221	3.4e-46	190.7	pyk	2.7.1.40	ko:K00873	ko00010,ko00230,ko00620,ko01100,ko01110,ko01120,ko01130,ko01200,ko01230,ko04922,ko04930,ko05165,ko05203,ko05230,map00010,map00230,map00620,map01100,map01110,map01120,map01130,map01200,map01230,map04922,map04930,map05165,map05203,map05230	M00001,M00002,M00049,M00050	R00200,R00430,R01138,R01858,R02320	RC00002,RC00015	ko00000,ko00001,ko00002,ko01000,ko04131,ko04147			e_coli_core.b1854,iAF1260.b1854,iB21_1397.B21_01813,iBWG_1329.BWG_1668,iEC042_1314.EC042_2021,iECBD_1354.ECBD_1784,iECB_1328.ECB_01825,iECDH10B_1368.ECDH10B_1995,iECDH1ME8569_1439.ECDH1ME8569_1801,iECD_1391.ECD_01825,iECO103_1326.ECO103_2044,iECO111_1330.ECO111_2362,iECO26_1355.ECO26_2692,iECUMN_1333.ECUMN_2152,iETEC_1333.ETEC_1887,iEcDH1_1363.EcDH1_1786,iEcE24377_1341.EcE24377A_2084,iEcHS_1320.E…	G	Belongs to the pyruvate kinase family	Gene3D, PANTHER, SUPERFAMILY, Pfam, Gene3D, PANTHER, SUPERFAMILY	G3DSA:3.20.20.60, PTHR11817, SSF51621, PF00224, G3DSA:2.40.33.10, PTHR11817:SF3, SSF50800	Pyruvate kinase, barrel domain	IPR040442, IPR001697, IPR015813, IPR015793, IPR015806, IPR011037	Pyruvate kinase-like domain superfamily, Pyruvate kinase, Pyruvate/Phosphoenolpyruvate kinase-like domain superfamily, Pyruvate kinase, barrel, Pyruvate kinase, insert domain superfamily, Pyruvate kinase-like, insert domain superfamily	GO:0003674, GO:0003824, GO:0004743, GO:0005488, GO:0005515, GO:0005575, GO:0005622, GO:0005623, GO:0005737, GO:0005829, GO:0005886, GO:0005975, GO:0006082, GO:0006090, GO:0006091, GO:0006096, GO:0006139, GO:0006163, GO:0006164, GO:0006165, GO:0006725, GO:0006732, GO:0006733, GO:0006753, GO:0006754, GO:0006757, GO:0006793, GO:0006796, GO:0006807, GO:0008150, GO:0008152, GO:0009056, GO:0009058, GO:…	KEGG: 00010+2.7.1.40, KEGG: 00230+2.7.1.40, KEGG: 00620+2.7.1.40, MetaCyc: PWY-1042, MetaCyc: PWY-2221, MetaCyc: PWY-5484, MetaCyc: PWY-5723, MetaCyc: PWY-6142, MetaCyc: PWY-6886, MetaCyc: PWY-6901, MetaCyc: PWY-7003, MetaCyc: PWY-7218, MetaCyc: PWY-7383, MetaCyc: PWY-8004, Reactome: R-HSA-70171, KEGG: 00010+2.7.1.40, KEGG: 00230+2.7.1.40, KEGG: 00620+2.7.1.40, MetaCyc: PWY-1042, MetaCyc: PWY-222…
scaffold_40451_1	1448389.BAVQ01000005_gene3131	1.6e-73	282	secA		ko:K03070	ko02024,ko03060,ko03070,map02024,map03060,map03070	M00335			ko00000,ko00001,ko00002,ko02044	3.A.5.1,3.A.5.10,3.A.5.2,3.A.5.4			U	Part of the Sec protein translocase complex. Interacts with the SecYEG preprotein conducting channel. Has a central role in coupling the hydrolysis of ATP to the transfer of proteins into and across the cell membrane, serving as an ATP-driven molecular motor driving the stepwise translocation of polypeptide chains across the membrane	MobiDBLite, ProSiteProfiles, SUPERFAMILY, MobiDBLite, Pfam, PANTHER, SUPERFAMILY, CDD, Gene3D, PANTHER, Gene3D	mobidb-lite, PS51196, SSF81886, mobidb-lite, PF07516, PTHR30612, SSF52540, cd18803, G3DSA:3.40.50.300, PTHR30612:SF6, G3DSA:1.10.3060.10	consensus disorder prediction, SecA family profile, consensus disorder prediction, SecA Wing and Scaffold domain, SF2_C_secA	IPR014018, IPR036266, IPR011116, IPR000185, IPR027417	SecA motor DEAD, SecA, Wing/Scaffold superfamily, SecA Wing/Scaffold, Protein translocase subunit SecA, P-loop containing nucleoside triphosphate hydrolase	GO:0000166, GO:0003674, GO:0003824, GO:0005215, GO:0005488, GO:0005524, GO:0005575, GO:0005576, GO:0005618, GO:0005622, GO:0005623, GO:0005737, GO:0005829, GO:0005886, GO:0005887, GO:0006810, GO:0008104, GO:0008144, GO:0008150, GO:0008320, GO:0008565, GO:0015031, GO:0015399, GO:0015405, GO:0015440, GO:0015450, GO:0015462, GO:0015833, GO:0016020, GO:0016021, GO:0016462, GO:0016787, GO:0016817, GO:…
scaffold_40491_1	446469.Sked_04500	1.2e-35	155.6	tadA	3.5.4.1,3.5.4.33,3.8.1.5,6.3.4.19	ko:K01485,ko:K01563,ko:K04075,ko:K11991	ko00240,ko00330,ko00361,ko00625,ko01100,ko01120,map00240,map00330,map00361,map00625,map01100,map01120		R00974,R01411,R02922,R05284,R05367,R05368,R05369,R05370,R07669,R07670,R09597,R10223	RC00074,RC00477,RC00514,RC00809,RC01317,RC01340,RC01341,RC02013,RC02633,RC02634	ko00000,ko00001,ko01000,ko03016				FJ	Catalyzes the deamination of adenosine to inosine at the wobble position 34 of tRNA(Arg2)	PANTHER, Gene3D, SUPERFAMILY, CDD, Pfam, ProSiteProfiles, PANTHER	PTHR11079, G3DSA:3.40.140.10, SSF53927, cd01285, PF14437, PS51747, PTHR11079:SF169	nucleoside_deaminase, MafB19-like deaminase, Cytidine and deoxycytidylate deaminases domain profile.	IPR016193, IPR028883, IPR002125	Cytidine deaminase-like, tRNA-specific adenosine deaminase, Cytidine and deoxycytidylate deaminase domain	GO:0003824, GO:0002100, GO:0008251	Reactome: R-HSA-6782315,
scaffold_40519_1	1077144.AGFF01000023_gene1055	6e-61	240.4	dapE	3.5.1.18	ko:K01439	ko00300,ko01100,ko01120,ko01230,map00300,map01100,map01120,map01230	M00016	R02734	RC00064,RC00090	ko00000,ko00001,ko00002,ko01000				E	succinyl-diaminopimelate desuccinylase	PANTHER, Gene3D, CDD, PANTHER, SUPERFAMILY, Pfam	PTHR43808:SF8, G3DSA:3.40.630.10, cd05647, PTHR43808, SSF53187, PF01546	M20_DapE_actinobac, Peptidase family M20/M25/M40	IPR002933	Peptidase M20	GO:0008150, GO:0040007GO:0016787
scaffold_40557_1	1448389.BAVQ01000043_gene1850	2.3e-76	291.6												S	unusual protein kinase	PANTHER, PANTHER, Pfam, SUPERFAMILY	PTHR43851, PTHR43851:SF5, PF03109, SSF56112	ABC1 family	IPR034646, IPR004147, IPR011009	UbiB domain, ADCK3-like, UbiB domain, Protein kinase-like domain superfamily
scaffold_40586_1	446469.Sked_04180	1.1e-54	219.5	fbpC	3.6.3.30,3.6.3.31	ko:K02010,ko:K02052,ko:K02062,ko:K11072	ko02010,ko02024,map02010,map02024	M00190,M00191,M00193,M00299			ko00000,ko00001,ko00002,ko01000,ko02000	3.A.1.10,3.A.1.11,3.A.1.11.1,3.A.1.19			E	Belongs to the ABC transporter superfamily	Gene3D, PANTHER, Pfam, SUPERFAMILY, ProSitePatterns	G3DSA:3.40.50.300, PTHR42781, PF00005, SSF52540, PS00211	ABC transporter, ABC transporters family signature.	IPR003439, IPR027417, IPR017871	ABC transporter-like, P-loop containing nucleoside triphosphate hydrolase, ABC transporter, conserved site	GO:0005524, GO:0016887, GO:0005524, GO:0016887
scaffold_40588_1	1077144.AGFF01000005_gene2150	1.2e-82	312.4												P	C4-dicarboxylate transporter malic acid transport protein	TMHMM, TMHMM, TMHMM, Gene3D, Pfam, TMHMM, CDD, TMHMM	TMhelix, TMhelix, TMhelix, G3DSA:1.50.10.150, PF03595, TMhelix, cd09319, TMhelix	Region of a membrane-bound protein predicted to be embedded in the membrane, Region of a membrane-bound protein predicted to be embedded in the membrane, Region of a membrane-bound protein predicted to be embedded in the membrane, Voltage-dependent anion channel, Region of a membrane-bound protein predicted to be embedded in the membrane, TDT_like_1, Region of a membrane-bound protein predicted t…	IPR038665, IPR004695	Voltage-dependent anion channel superfamily, Voltage-dependent anion channel	GO:0016021, GO:0055085
scaffold_40591_1	1448389.BAVQ01000070_gene2252	2e-30	137.9														NA	NA	NA	NA	NA	na	NA
scaffold_40656_1	1448389.BAVQ01000003_gene3537	4.1e-11	72.8	yqfO	3.5.4.16	ko:K22391	ko00790,ko01100,map00790,map01100	M00126	R00428,R04639,R05046,R05048	RC00263,RC00294,RC00323,RC00945,RC01188	ko00000,ko00001,ko00002,ko01000				L	Belongs to the GTP cyclohydrolase I type 2 NIF3 family	NA	NA	NA	NA	NA	GO:0005575, GO:0005622, GO:0005623, GO:0005737, GO:0044424, GO:0044464na	NA
scaffold_40656_2	1448389.BAVQ01000003_gene3536	7.2e-29	132.9			ko:K07164					ko00000				S	Zn-ribbon protein, possibly nucleic acid-binding	Coils	Coil				GO:0005575, GO:0005618, GO:0005623, GO:0005886, GO:0008150, GO:0016020, GO:0030312, GO:0040007, GO:0044464, GO:0071944
scaffold_40674_1	1448389.BAVQ01000083_gene143	3.4e-72	277.7		2.4.1.11,2.4.1.18	ko:K16149,ko:K16150	ko00500,ko01100,ko01110,map00500,map01100,map01110	M00565	R00292,R02110	RC00005	ko00000,ko00001,ko00002,ko01000,ko01003		GH57,GT4		G	PFAM Glycosyl transferase, group 1	Gene3D, PANTHER, PANTHER, Pfam, SUPERFAMILY, CDD	G3DSA:3.40.50.2000, PTHR12526:SF554, PTHR12526, PF00534, SSF53756, cd03801	Glycosyl transferases group 1, GT4_PimA-like	IPR001296	Glycosyl transferase, family 1	GO:0000271, GO:0003674, GO:0003824, GO:0005975, GO:0005976, GO:0005977, GO:0005978, GO:0006073, GO:0006091, GO:0006112, GO:0006629, GO:0008150, GO:0008152, GO:0008610, GO:0008653, GO:0009058, GO:0009059, GO:0009103, GO:0009250, GO:0009987, GO:0015980, GO:0016051, GO:0016740, GO:0016757, GO:0033692, GO:0034637, GO:0034645, GO:0040007, GO:0043170, GO:0044042, GO:0044237, GO:0044238, GO:0044249, GO:…
scaffold_40692_1	1448389.BAVQ01000083_gene236	3.2e-17	94.7		2.7.11.1	ko:K04757					ko00000,ko01000,ko01001,ko03021				T	anti-sigma regulatory factor	NA	NA	NA	NA	NA	na	NA
scaffold_40744_1	1448389.BAVQ01000036_gene920	5.6e-19	99.4	carD		ko:K07736					ko00000,ko03000				K	transcriptional regulator	Gene3D, PANTHER	G3DSA:1.20.58.1290, PTHR38447		IPR042215	CarD-like, C-terminal domain	GO:0006950, GO:0007154, GO:0008150, GO:0009267, GO:0009405, GO:0009605, GO:0009987, GO:0009991, GO:0015968, GO:0031667, GO:0031668, GO:0031669, GO:0033554, GO:0040007, GO:0042594, GO:0044419, GO:0050896, GO:0051704, GO:0051716, GO:0071496
scaffold_40744_2	1448389.BAVQ01000036_gene921	2.1e-27	128.3	ispD	1.1.1.405,2.7.7.40,2.7.7.60,4.6.1.12	ko:K00991,ko:K12506,ko:K21681	ko00040,ko00900,ko01100,ko01110,ko01130,map00040,map00900,map01100,map01110,map01130	M00096	R01525,R02921,R05633,R05637	RC00002,RC00089,RC01440	ko00000,ko00001,ko00002,ko01000				I	Catalyzes the formation of 4-diphosphocytidyl-2-C- methyl-D-erythritol from CTP and 2-C-methyl-D-erythritol 4- phosphate (MEP)	PANTHER, Pfam, SUPERFAMILY, PANTHER, Gene3D	PTHR32125:SF4, PF01128, SSF53448, PTHR32125, G3DSA:3.90.550.10	2-C-methyl-D-erythritol 4-phosphate cytidylyltransferase	IPR034683, IPR029044, IPR029044	Cytidylyltransferase IspD/TarI, Nucleotide-diphospho-sugar transferases, Nucleotide-diphospho-sugar transferases	GO:0000166, GO:0000287, GO:0001882, GO:0001884, GO:0002135, GO:0003674, GO:0003824, GO:0005488, GO:0005575, GO:0005623, GO:0005886, GO:0006081, GO:0006082, GO:0006090, GO:0006629, GO:0006644, GO:0006720, GO:0006721, GO:0006793, GO:0006796, GO:0008150, GO:0008152, GO:0008270, GO:0008299, GO:0008610, GO:0008654, GO:0009058, GO:0009240, GO:0009987, GO:0016020, GO:0016114, GO:0016740, GO:0016772, GO:…	KEGG: 00900+2.7.7.60, MetaCyc: PWY-7560,
scaffold_40780_1	1448389.BAVQ01000070_gene2360	2.4e-70	271.6												EGP	Major facilitator Superfamily	TMHMM, CDD, TMHMM, TMHMM, Gene3D, PANTHER, ProSiteProfiles, PANTHER, SUPERFAMILY, TMHMM, Pfam, TMHMM	TMhelix, cd17502, TMhelix, TMhelix, G3DSA:1.20.1720.10, PTHR23501:SF166, PS50850, PTHR23501, SSF103473, TMhelix, PF07690, TMhelix	Region of a membrane-bound protein predicted to be embedded in the membrane, MFS_Azr1_MDR_like, Region of a membrane-bound protein predicted to be embedded in the membrane, Region of a membrane-bound protein predicted to be embedded in the membrane, Major facilitator superfamily (MFS) profile, Region of a membrane-bound protein predicted to be embedded in the membrane, Major Facilitator Superfami…	IPR020846, IPR001411, IPR036259, IPR011701	Major facilitator superfamily domain, Tetracycline resistance protein/drug resistance transporter, MFS transporter superfamily, Major facilitator superfamily	GO:0055085
scaffold_40793_1	1448389.BAVQ01000043_gene1787	1.6e-77	295.4	murI	3.6.1.66,5.1.1.3	ko:K01776,ko:K02428	ko00230,ko00471,ko01100,map00230,map00471,map01100		R00260,R00426,R00720,R01855,R02100,R02720,R03531	RC00002,RC00302	ko00000,ko00001,ko01000,ko01011			iYO844.BSU28390	M	Provides the (R)-glutamate required for cell wall biosynthesis	SUPERFAMILY, TIGRFAM, Gene3D, Gene3D, SUPERFAMILY, ProSitePatterns, PANTHER, PANTHER, Pfam	SSF53681, TIGR00067, G3DSA:3.40.50.1860, G3DSA:3.40.50.1860, SSF53681, PS00923, PTHR21198, PTHR21198:SF2, PF01177	glut_race: glutamate racemase, Aspartate and glutamate racemases signature 1, Asp/Glu/Hydantoin racemase	IPR001920, IPR004391, IPR001920, IPR018187, IPR004391, IPR015942	Asp/Glu racemase, Glutamate racemase, Asp/Glu racemase, Asp/Glu racemase, active site 1, Glutamate racemase, Asp/Glu/hydantoin racemase	GO:0000270, GO:0003674, GO:0003824, GO:0004857, GO:0005488, GO:0005515, GO:0005575, GO:0005623, GO:0005886, GO:0006022, GO:0006023, GO:0006024, GO:0006807, GO:0008150, GO:0008152, GO:0008657, GO:0008881, GO:0009058, GO:0009059, GO:0009252, GO:0009273, GO:0009987, GO:0010911, GO:0016020, GO:0016853, GO:0016854, GO:0016855, GO:0030203, GO:0030234, GO:0032780, GO:0034645, GO:0036361, GO:0042030, GO:…	KEGG: 00471+5.1.1.3, MetaCyc: PWY-6386, MetaCyc: PWY-6387, KEGG: 00471+5.1.1.3, MetaCyc: PWY-6386, MetaCyc: PWY-6387, KEGG: 00471+5.1.1.3, MetaCyc: PWY-6386, MetaCyc: PWY-6387, KEGG: 00471+5.1.1.3, MetaCyc: PWY-6386, MetaCyc: PWY-6387, KEGG: 00471+5.1.1.3, MetaCyc: PWY-6386, MetaCyc: PWY-6387, KEGG: 00471+5.1.1.3, MetaCyc: PWY-6386, MetaCyc: PWY-6387
scaffold_40908_1	471856.Jden_1506	1.3e-30	139												S	Ketosteroid isomerase-related protein	Gene3D, SUPERFAMILY	G3DSA:3.10.450.50, SSF54427		IPR032710	NTF2-like domain superfamily
scaffold_41027_1	471856.Jden_1924	3.9e-46	190.7	eno	4.2.1.11	ko:K01689	ko00010,ko00680,ko01100,ko01110,ko01120,ko01130,ko01200,ko01230,ko03018,ko04066,map00010,map00680,map01100,map01110,map01120,map01130,map01200,map01230,map03018,map04066	M00001,M00002,M00003,M00346,M00394	R00658	RC00349	ko00000,ko00001,ko00002,ko01000,ko03019,ko04147				G	Catalyzes the reversible conversion of 2- phosphoglycerate into phosphoenolpyruvate. It is essential for the degradation of carbohydrates via glycolysis	Gene3D, SMART, PRINTS, PRINTS, PANTHER, Pfam, ProSitePatterns, PANTHER, SUPERFAMILY	G3DSA:3.20.20.120, SM01192, PR00148, PR00148, PTHR11902:SF1, PF00113, PS00164, PTHR11902, SSF51604	Enolase signature, Enolase signature, Enolase, C-terminal TIM barrel domain, Enolase signature.	IPR036849, IPR020810, IPR000941, IPR000941, IPR020810, IPR020809, IPR000941, IPR036849	Enolase-like, C-terminal domain superfamily, Enolase, C-terminal TIM barrel domain, Enolase, Enolase, Enolase, C-terminal TIM barrel domain, Enolase, conserved site, Enolase, Enolase-like, C-terminal domain superfamily	GO:0000015, GO:0000287, GO:0004634, GO:0006096, GO:0000015, GO:0000287, GO:0004634, GO:0006096, GO:0000015, GO:0000287, GO:0004634, GO:0006096	KEGG: 00010+4.2.1.11, KEGG: 00680+4.2.1.11, MetaCyc: PWY-1042, MetaCyc: PWY-1622, MetaCyc: PWY-2221, MetaCyc: PWY-5484, MetaCyc: PWY-5723, MetaCyc: PWY-6142, MetaCyc: PWY-6886, MetaCyc: PWY-6901, MetaCyc: PWY-7003, MetaCyc: PWY-7124, MetaCyc: PWY-7218, MetaCyc: PWY-8004, KEGG: 00010+4.2.1.11, KEGG: 00680+4.2.1.11, MetaCyc: PWY-1042, MetaCyc: PWY-1622, MetaCyc: PWY-2221, MetaCyc: PWY-5484, MetaCyc…
scaffold_41032_1	1448389.BAVQ01000022_gene1623	1.3e-47	196.1	MA20_17250		ko:K02035	ko02024,map02024	M00239			ko00000,ko00001,ko00002,ko02000	3.A.1.5			E	Bacterial extracellular solute-binding proteins, family 5 Middle	SUPERFAMILY, Gene3D, Pfam	SSF53850, G3DSA:3.10.105.10, PF00496	Bacterial extracellular solute-binding proteins, family 5 Middle	IPR000914	Solute-binding protein family 5 domain
scaffold_41050_1	68260.JOAY01000003_gene4594	1.9e-11	75.9												L	viral genome integration into host DNA	MobiDBLite	mobidb-lite	consensus disorder prediction
scaffold_41065_1	1095772.CAHH01000055_gene1635	5.6e-32	143.7	clpX		ko:K03544	ko04112,map04112				ko00000,ko00001,ko03110				O	ATP-dependent specificity component of the Clp protease. It directs the protease to specific substrates. Can perform chaperone functions in the absence of ClpP	Gene3D, PANTHER, PANTHER, SUPERFAMILY, SMART, Pfam	G3DSA:1.10.8.60, PTHR11262, PTHR11262:SF4, SSF52540, SM01086, PF10431	C-terminal, D2-small domain, of ClpB protein	IPR004487, IPR027417, IPR019489, IPR019489	Clp protease, ATP-binding subunit ClpX, P-loop containing nucleoside triphosphate hydrolase, Clp ATPase, C-terminal, Clp ATPase, C-terminal	GO:0000166, GO:0000502, GO:0002020, GO:0003674, GO:0003824, GO:0004176, GO:0005488, GO:0005515, GO:0005524, GO:0005575, GO:0005622, GO:0005623, GO:0005737, GO:0005829, GO:0006508, GO:0006807, GO:0008144, GO:0008150, GO:0008152, GO:0008233, GO:0009056, GO:0009057, GO:0009376, GO:0009987, GO:0016462, GO:0016787, GO:0016817, GO:0016818, GO:0016887, GO:0017076, GO:0017111, GO:0019538, GO:0019899, GO:…
scaffold_41086_1	1448389.BAVQ01000011_gene3961	1.6e-69	268.9												EH	D-isomer specific 2-hydroxyacid dehydrogenase	PANTHER, ProSitePatterns, Gene3D, SUPERFAMILY, Pfam	PTHR43333, PS00671, G3DSA:3.40.50.720, SSF51735, PF02826	D-isomer specific 2-hydroxyacid dehydrogenases signature 3, D-isomer specific 2-hydroxyacid dehydrogenase, NAD binding domain	IPR029753, IPR036291, IPR006140	D-isomer specific 2-hydroxyacid dehydrogenase, NAD-binding domain conserved site, NAD(P)-binding domain superfamily, D-isomer specific 2-hydroxyacid dehydrogenase, NAD-binding domain	GO:0051287, GO:0055114
scaffold_41232_1	1448389.BAVQ01000003_gene3559	7e-86	323.2	dnaG		ko:K02316	ko03030,map03030				ko00000,ko00001,ko01000,ko03032				L	RNA polymerase that catalyzes the synthesis of short RNA molecules used as primers for DNA polymerase during DNA replication	SUPERFAMILY, Pfam, Gene3D, Pfam, Gene3D, PANTHER, SMART, SUPERFAMILY	SSF56731, PF01807, G3DSA:3.90.580.10, PF08275, G3DSA:3.90.980.10, PTHR30313, SM00400, SSF57783	CHC2 zinc finger, DNA primase catalytic core, N-terminal domain	IPR002694, IPR036977, IPR013264, IPR037068, IPR002694	Zinc finger, CHC2-type, DNA Primase, CHC2-type zinc finger, DNA primase, catalytic core, N-terminal, DNA primase, catalytic core, N-terminal domain superfamily, Zinc finger, CHC2-type	GO:0005575, GO:0005623, GO:0005886, GO:0008150, GO:0016020, GO:0040007, GO:0044464, GO:0071944GO:0003677, GO:0003896, GO:0006260, GO:0008270, GO:0003677, GO:0006260, GO:0008270, GO:0003677, GO:0003896, GO:0006260, GO:0008270
scaffold_41247_1	1448389.BAVQ01000006_gene3272	4.4e-72	277.3			ko:K03307					ko00000	2.A.21			E	Belongs to the sodium solute symporter (SSF) (TC 2.A.21) family	ProSiteProfiles, PANTHER, PANTHER, TMHMM, Pfam, TMHMM, TMHMM, Gene3D, TMHMM	PS50283, PTHR43291, PTHR43291:SF5, TMhelix, PF00474, TMhelix, TMhelix, G3DSA:1.20.1730.10, TMhelix	Sodium:solute symporter family profile, Region of a membrane-bound protein predicted to be embedded in the membrane, Sodium:solute symporter family, Region of a membrane-bound protein predicted to be embedded in the membrane, Region of a membrane-bound protein predicted to be embedded in the membrane, Region of a membrane-bound protein predicted to be embedded in the membrane.	IPR001734, IPR001734, IPR038377	Sodium/solute symporter, Sodium/solute symporter, Sodium/glucose symporter superfamily	GO:0016020, GO:0022857, GO:0055085, GO:0016020, GO:0022857, GO:0055085
scaffold_41253_1	321955.AAGP01000050_gene3729	6.9e-59	233.4	nanE	5.1.3.9	ko:K01788	ko00520,map00520		R02087	RC00290	ko00000,ko00001,ko01000				G	Converts N-acetylmannosamine-6-phosphate (ManNAc-6-P) to N-acetylglucosamine-6-phosphate (GlcNAc-6-P)	ProSiteProfiles, Pfam, PANTHER, SUPERFAMILY, Gene3D	PS50972, PF04131, PTHR36204, SSF51366, G3DSA:3.20.20.70	Pterin-binding domain profile, Putative N-acetylmannosamine-6-phosphate epimerase	IPR000489, IPR007260, IPR007260, IPR011060, IPR013785	Pterin-binding domain, Putative N-acetylmannosamine-6-phosphate epimerase, Putative N-acetylmannosamine-6-phosphate epimerase, Ribulose-phosphate binding barrel, Aldolase-type TIM barrel	GO:0042558, GO:0006051, GO:0047465, GO:0006051, GO:0047465, GO:0003824, GO:0003824	Reactome: R-HSA-156581, Reactome: R-HSA-1614635, Reactome: R-HSA-196741, Reactome: R-HSA-3359467, Reactome: R-HSA-3359469, KEGG: 00520+5.1.3.9, KEGG: 00520+5.1.3.9,
scaffold_41264_1	1121019.AUMN01000001_gene452	2.6e-20	104												S	Ribbon-helix-helix protein, copG family	MobiDBLite	mobidb-lite	consensus disorder prediction
scaffold_41285_1	1448389.BAVQ01000015_gene4142	3.2e-46	191.4												L	helicase	Pfam	PF18135	Type ISP C-terminal specificity domain	IPR041635	Type ISP restriction-modification enzyme LLaBIII, C-terminal specificity domain
scaffold_41286_2	1122622.ATWJ01000013_gene80	6.1e-09	65.5		2.3.1.57	ko:K00657	ko00330,ko01100,ko04216,map00330,map01100,map04216	M00135	R01154	RC00004,RC00096	ko00000,ko00001,ko00002,ko01000				J	Acetyltransferase (GNAT) domain	NA	NA	NA	NA	NA	na	NA
scaffold_41287_1	1448389.BAVQ01000008_gene4156	1.4e-62	245.7		3.5.1.4	ko:K01426	ko00330,ko00360,ko00380,ko00627,ko00643,ko01120,map00330,map00360,map00380,map00627,map00643,map01120		R02540,R03096,R03180,R03909,R05551,R05590	RC00010,RC00100,RC00950,RC01025	ko00000,ko00001,ko01000				J	Belongs to the amidase family	Gene3D, Pfam, SUPERFAMILY, PANTHER, PANTHER	G3DSA:3.90.1300.10, PF01425, SSF75304, PTHR11895:SF35, PTHR11895	Amidase	IPR036928, IPR023631, IPR036928, IPR000120	Amidase signature (AS) superfamily, Amidase signature domain, Amidase signature (AS) superfamily, Amidase	GO:0004040	KEGG: 00970+6.3.5.7, KEGG: 00970+6.3.5.7, KEGG: 00970+6.3.5.7, KEGG: 00970+6.3.5.7
scaffold_41297_2	1292020.H483_0116455	2.9e-37	161	nuoK	1.6.5.3	ko:K00340,ko:K05576	ko00190,ko01100,map00190,map01100	M00144,M00145	R11945	RC00061	ko00000,ko00001,ko00002,ko01000	3.D.1			C	NDH-1 shuttles electrons from NADH, via FMN and iron- sulfur (Fe-S) centers, to quinones in the respiratory chain. The immediate electron acceptor for the enzyme in this species is believed to be a menaquinone. Couples the redox reaction to proton translocation (for every two electrons transferred, four hydrogen ions are translocated across the cytoplasmic membrane), and thus conserves the redox …	PANTHER, PANTHER, TMHMM, TMHMM, Pfam, Hamap, TMHMM	PTHR11434, PTHR11434:SF13, TMhelix, TMhelix, PF00420, MF_01456, TMhelix	Region of a membrane-bound protein predicted to be embedded in the membrane, Region of a membrane-bound protein predicted to be embedded in the membrane, NADH-ubiquinone/plastoquinone oxidoreductase chain 4L, NAD(P)H-quinone oxidoreductase subunit 4L, chloroplastic [ndhE], Region of a membrane-bound protein predicted to be embedded in the membrane.	IPR001133, IPR039428, IPR001133	NADH-ubiquinone oxidoreductase chain 4L/K, NADH-ubiquinone oxidoreductase chain 4L/Mnh complex subunit C1-like, NADH-ubiquinone oxidoreductase chain 4L/K	GO:0003674, GO:0003824, GO:0003954, GO:0005575, GO:0005623, GO:0005886, GO:0006091, GO:0006119, GO:0006120, GO:0006139, GO:0006163, GO:0006725, GO:0006753, GO:0006793, GO:0006796, GO:0006807, GO:0008137, GO:0008150, GO:0008152, GO:0009117, GO:0009123, GO:0009126, GO:0009141, GO:0009144, GO:0009150, GO:0009161, GO:0009167, GO:0009199, GO:0009205, GO:0009259, GO:0009987, GO:0015980, GO:0016020, GO:…
scaffold_41325_1	1077144.AGFF01000006_gene1658	2.4e-70	271.6												EG	Permeases of the drug metabolite transporter (DMT) superfamily	TMHMM, TMHMM, TMHMM, TMHMM, PANTHER	TMhelix, TMhelix, TMhelix, TMhelix, PTHR40761	Region of a membrane-bound protein predicted to be embedded in the membrane, Region of a membrane-bound protein predicted to be embedded in the membrane, Region of a membrane-bound protein predicted to be embedded in the membrane, Region of a membrane-bound protein predicted to be embedded in the membrane.
scaffold_41344_1	1122130.AUHN01000010_gene372	1.1e-54	219.5	obg		ko:K03979					ko00000,ko01000,ko03009				S	An essential GTPase which binds GTP, GDP and possibly (p)ppGpp with moderate affinity, with high nucleotide exchange rates and a fairly low GTP hydrolysis rate. Plays a role in control of the cell cycle, stress response, ribosome biogenesis and in those bacteria that undergo differentiation, in morphogenesis control	SUPERFAMILY, Gene3D, MobiDBLite, TIGRFAM, MobiDBLite, Pfam	SSF102741, G3DSA:2.40.240.60, mobidb-lite, TIGR03595, mobidb-lite, PF09269	consensus disorder prediction, Obg_CgtA_exten: Obg family GTPase CgtA, C-terminal extension, consensus disorder prediction, Domain of unknown function (DUF1967)	IPR036346, IPR036346, IPR015349, IPR015349	GTP-binding protein OBG, C-terminal domain superfamily, GTP-binding protein OBG, C-terminal domain superfamily, GTP-binding protein OBG, C-terminal, GTP-binding protein OBG, C-terminal	GO:0000287, GO:0003674, GO:0003824, GO:0003924, GO:0005488, GO:0005575, GO:0005622, GO:0005623, GO:0005737, GO:0005840, GO:0005886, GO:0006464, GO:0006468, GO:0006793, GO:0006796, GO:0006807, GO:0008150, GO:0008152, GO:0009987, GO:0016020, GO:0016310, GO:0016462, GO:0016787, GO:0016817, GO:0016818, GO:0017111, GO:0019538, GO:0032991, GO:0036211, GO:0040007, GO:0043167, GO:0043169, GO:0043170, GO:…
scaffold_41414_1	1095772.CAHH01000009_gene2104	2.3e-60	238.4	gguB		ko:K10547	ko02010,map02010	M00216			ko00000,ko00001,ko00002,ko02000	3.A.1.2.5			G	Belongs to the binding-protein-dependent transport system permease family	PANTHER, TMHMM, PANTHER, TMHMM, Pfam, TMHMM, TMHMM, TMHMM	PTHR32196, TMhelix, PTHR32196:SF32, TMhelix, PF02653, TMhelix, TMhelix, TMhelix	Region of a membrane-bound protein predicted to be embedded in the membrane, Region of a membrane-bound protein predicted to be embedded in the membrane, Branched-chain amino acid transport system / permease component, Region of a membrane-bound protein predicted to be embedded in the membrane, Region of a membrane-bound protein predicted to be embedded in the membrane, Region of a membrane-bound…	IPR001851	ABC transporter, permease	GO:0005575, GO:0005623, GO:0005886, GO:0005975, GO:0005996, GO:0008150, GO:0008152, GO:0016020, GO:0016021, GO:0019321, GO:0031224, GO:0042732, GO:0044238, GO:0044281, GO:0044425, GO:0044464, GO:0071704, GO:0071944GO:0016020, GO:0022857, GO:0055085
scaffold_41447_1	1448389.BAVQ01000035_gene756	2.3e-65	255	ybbM		ko:K02069		M00211			ko00000,ko00002,ko02000	9.B.25.1			V	transport system permease	PANTHER, SignalP_EUK, TMHMM, TMHMM, Pfam, TMHMM, SignalP_GRAM_POSITIVE	PTHR30028, SignalP-TM, TMhelix, TMhelix, PF03649, TMhelix, SignalP-TM	Region of a membrane-bound protein predicted to be embedded in the membrane, Region of a membrane-bound protein predicted to be embedded in the membrane, Uncharacterised protein family (UPF0014), Region of a membrane-bound protein predicted to be embedded in the membrane.	IPR005226, IPR005226	UPF0014 family, UPF0014 family	GO:0003674, GO:0005215, GO:0005575, GO:0005623, GO:0005886, GO:0005887, GO:0006810, GO:0006811, GO:0006873, GO:0006875, GO:0006879, GO:0008150, GO:0009987, GO:0015075, GO:0016020, GO:0016021, GO:0019725, GO:0022857, GO:0030003, GO:0031224, GO:0031226, GO:0034220, GO:0042592, GO:0044425, GO:0044459, GO:0044464, GO:0046916, GO:0048878, GO:0050801, GO:0051179, GO:0051234, GO:0055065, GO:0055072, GO:…
scaffold_41449_1	1448389.BAVQ01000006_gene3234	1.4e-70	272.3	MA20_40060	1.3.8.7	ko:K00249	ko00071,ko00280,ko00410,ko00640,ko01100,ko01110,ko01130,ko01200,ko01212,ko03320,map00071,map00280,map00410,map00640,map01100,map01110,map01130,map01200,map01212,map03320	M00013,M00036,M00087	R00924,R01175,R01279,R02661,R03172,R03777,R03857,R03990,R04095,R04432,R04751,R04754	RC00052,RC00068,RC00076,RC00095,RC00148,RC00246	ko00000,ko00001,ko00002,ko01000				I	acyl-CoA dehydrogenase	Gene3D, SUPERFAMILY, Pfam, PANTHER, PANTHER	G3DSA:1.20.140.10, SSF47203, PF00441, PTHR43292, PTHR43292:SF4	Acyl-CoA dehydrogenase, C-terminal domain	IPR036250, IPR009075	Acyl-CoA dehydrogenase-like, C-terminal, Acyl-CoA dehydrogenase/oxidase C-terminal	GO:0016627, GO:0055114, GO:0016627, GO:0055114
scaffold_4145_1	1298880.AUEV01000002_gene1779	1e-16	93.6												M	COG3209 Rhs family protein	MobiDBLite, Pfam, PANTHER, PANTHER, MobiDBLite, Gene3D, TIGRFAM, Gene3D	mobidb-lite, PF15526, PTHR32305, PTHR32305:SF15, mobidb-lite, G3DSA:2.180.10.10, TIGR03696, G3DSA:3.10.380.20	consensus disorder prediction, Novel toxin 21, consensus disorder prediction, Rhs_assc_core: RHS repeat-associated core domain	IPR028190, IPR022385, IPR038181	Novel toxin 21, Rhs repeat-associated core, Novel toxin 21 superfamily
scaffold_41541_1	67275.JOAP01000009_gene3905	6.3e-08	63.2														NA	NA	NA	NA	NA	na	NA
scaffold_41577_1	1448389.BAVQ01000006_gene3288	2.2e-76	291.6	murD	3.4.21.10,6.3.2.13,6.3.2.9	ko:K01317,ko:K01925,ko:K01928,ko:K01932	ko00300,ko00471,ko00550,ko01100,map00300,map00471,map00550,map01100		R02783,R02788	RC00064,RC00090,RC00141	ko00000,ko00001,ko01000,ko01002,ko01011,ko04131				M	Mur ligase, middle domain protein	SUPERFAMILY, PANTHER, PANTHER, Pfam	SSF53623, PTHR23135:SF7, PTHR23135, PF08353	Domain of unknown function (DUF1727)	IPR036565, IPR013564	Mur-like, catalytic domain superfamily, Domain of unknown function DUF1727	GO:0005524, GO:0009058	Reactome: R-HSA-196757, KEGG: 00550+6.3.5.13, MetaCyc: PWY-5265, MetaCyc: PWY-6471
scaffold_41641_1	1448389.BAVQ01000038_gene1948	2.4e-78	298.1	cyp130		ko:K21119					ko00000,ko00199				Q	cytochrome p450	CDD, PRINTS, PRINTS, PRINTS, Gene3D, PANTHER, PANTHER, SUPERFAMILY	cd05969, PR00359, PR00359, PR00359, G3DSA:1.10.630.10, PTHR46696:SF1, PTHR46696, SSF48264	MACS_like_4, B-class P450 signature, B-class P450 signature, B-class P450 signature	IPR002397, IPR002397, IPR002397, IPR036396, IPR036396	Cytochrome P450, B-class, Cytochrome P450, B-class, Cytochrome P450, B-class, Cytochrome P450 superfamily, Cytochrome P450 superfamily	GO:0003674, GO:0005488, GO:0005575, GO:0005618, GO:0005623, GO:0020037, GO:0030312, GO:0044464, GO:0046906, GO:0048037, GO:0071944, GO:0097159, GO:1901363GO:0005506, GO:0020037, GO:0055114, GO:0005506, GO:0020037, GO:0055114, GO:0005506, GO:0020037, GO:0055114, GO:0005506, GO:0016705, GO:0020037, GO:0055114, GO:0005506, GO:0016705, GO:0020037, GO:0055114
scaffold_41675_1	1448389.BAVQ01000071_gene2426	5.7e-80	303.5		1.2.1.39	ko:K00146	ko00360,ko00643,ko01100,ko01120,map00360,map00643,map01100,map01120		R02536	RC00080	ko00000,ko00001,ko01000				C	Belongs to the aldehyde dehydrogenase family	Gene3D, PANTHER, SUPERFAMILY, Pfam	G3DSA:3.40.309.10, PTHR11699, SSF53720, PF00171	Aldehyde dehydrogenase family	IPR016163, IPR016161, IPR015590	Aldehyde dehydrogenase, C-terminal, Aldehyde/histidinol dehydrogenase, Aldehyde dehydrogenase domain	GO:0016491, GO:0016620, GO:0055114, GO:0016491, GO:0055114, GO:0016491, GO:0055114
scaffold_41736_1	1448389.BAVQ01000013_gene4040	2.8e-63	248.1			ko:K01998	ko02010,ko02024,map02010,map02024	M00237			ko00000,ko00001,ko00002,ko02000	3.A.1.4			I	Alpha beta hydrolase	SUPERFAMILY, Gene3D	SSF53474, G3DSA:3.40.50.1820		IPR029058, IPR029058	Alpha/Beta hydrolase fold, Alpha/Beta hydrolase fold
scaffold_41829_1	1095772.CAHH01000027_gene2541	6.4e-15	87.4			ko:K06994					ko00000				F	Drug exporters of the RND superfamily	Coils	Coil
scaffold_4185_4	996637.SGM_3307	3.1e-56	224.9												K	NAD(P)H-dependent FMN reductase	Pfam, Gene3D, PANTHER, PANTHER, SUPERFAMILY	PF03358, G3DSA:3.40.50.360, PTHR30543:SF1, PTHR30543, SSF52218	NADPH-dependent FMN reductase	IPR005025, IPR029039, IPR029039	NADPH-dependent FMN reductase-like, Flavoprotein-like superfamily, Flavoprotein-like superfamily	GO:0016491
scaffold_41901_1	2002.JOEQ01000054_gene445	1.6e-16	92.4												EGP	Major facilitator Superfamily	TMHMM	TMhelix	Region of a membrane-bound protein predicted to be embedded in the membrane.
scaffold_41970_1	1077144.AGFF01000024_gene393	3.4e-77	294.3	maf	1.1.1.25,2.1.1.190	ko:K00014,ko:K03215,ko:K06287	ko00400,ko01100,ko01110,ko01130,ko01230,map00400,map01100,map01110,map01130,map01230	M00022	R02413	RC00206	ko00000,ko00001,ko00002,ko01000,ko03009				D	Maf-like protein	PIRSF, SUPERFAMILY, Pfam, Gene3D, PANTHER, PANTHER	PIRSF006305, SSF52972, PF02545, G3DSA:3.90.950.10, PTHR43213:SF5, PTHR43213	Maf-like protein	IPR003697, IPR029001, IPR003697, IPR029001, IPR003697	Nucleoside triphosphate pyrophosphatase Maf-like protein, Inosine triphosphate pyrophosphatase-like, Nucleoside triphosphate pyrophosphatase Maf-like protein, Inosine triphosphate pyrophosphatase-like, Nucleoside triphosphate pyrophosphatase Maf-like protein	GO:0003674, GO:0003824, GO:0005488, GO:0005515, GO:0005575, GO:0005618, GO:0005623, GO:0016462, GO:0016787, GO:0016817, GO:0016818, GO:0030145, GO:0030312, GO:0036218, GO:0036221, GO:0042802, GO:0043167, GO:0043169, GO:0044464, GO:0046872, GO:0046914, GO:0047429, GO:0071944GO:0047429, GO:0047429, GO:0047429	KEGG: 00230+3.6.1.9, KEGG: 00240+3.6.1.9, KEGG: 00500+3.6.1.9, KEGG: 00740+3.6.1.9, KEGG: 00760+3.6.1.9, KEGG: 00770+3.6.1.9, MetaCyc: PWY-6545, MetaCyc: PWY-7184, MetaCyc: PWY-7187, MetaCyc: PWY-7206, MetaCyc: PWY-7821, KEGG: 00230+3.6.1.9, KEGG: 00240+3.6.1.9, KEGG: 00500+3.6.1.9, KEGG: 00740+3.6.1.9, KEGG: 00760+3.6.1.9, KEGG: 00770+3.6.1.9, MetaCyc: PWY-6545, MetaCyc: PWY-7184, MetaCyc: PWY-7…
scaffold_42013_1	1448389.BAVQ01000071_gene2503	3.1e-29	134.8														MobiDBLite, Coils	mobidb-lite, Coil	consensus disorder prediction
scaffold_42047_1	1448389.BAVQ01000002_gene2987	5.6e-23	112.8	cwlM	3.2.1.17,3.5.1.28	ko:K01185,ko:K01448	ko01503,map01503	M00727	R04112	RC00064,RC00141	ko00000,ko00001,ko00002,ko01000,ko01011,ko03036				M	N-acetylmuramoyl-L-alanine amidase	NA	NA	NA	NA	NA	GO:0005575, GO:0005623, GO:0030288, GO:0030313, GO:0031975, GO:0042597, GO:0044464na	NA
scaffold_42077_1	1095772.CAHH01000026_gene2513	1.1e-72	279.3	pdhB	1.2.4.1	ko:K00162,ko:K21417	ko00010,ko00020,ko00620,ko01100,ko01110,ko01120,ko01130,ko01200,ko04066,ko04922,ko05230,map00010,map00020,map00620,map01100,map01110,map01120,map01130,map01200,map04066,map04922,map05230	M00307	R00014,R00209,R01699,R03270	RC00004,RC00027,RC00627,RC02742,RC02744,RC02882	br01601,ko00000,ko00001,ko00002,ko01000			iSB619.SA_RS05355,iYO844.BSU14590	C	Pyruvate 2-oxoglutarate dehydrogenase complex dehydrogenase (E1) component eukaryotic type beta subunit	SUPERFAMILY, PANTHER, Gene3D, PANTHER, Pfam	SSF52922, PTHR42980:SF6, G3DSA:3.40.50.920, PTHR42980, PF02780	Transketolase, C-terminal domain	IPR009014, IPR009014, IPR033248	Transketolase C-terminal/Pyruvate-ferredoxin oxidoreductase domain II, Transketolase C-terminal/Pyruvate-ferredoxin oxidoreductase domain II, Transketolase, C-terminal domain	GO:0003674, GO:0005488, GO:0005515, GO:0140030, GO:0140032GO:0003824, GO:0003824
scaffold_42144_1	1095772.CAHH01000058_gene1434	7.2e-67	260	frr		ko:K02838					ko00000,ko03012				J	Responsible for the release of ribosomes from messenger RNA at the termination of protein biosynthesis. May increase the efficiency of translation by recycling ribosomes from one round of translation to another	MobiDBLite, Pfam, TIGRFAM, SUPERFAMILY, CDD, Gene3D, PANTHER, Gene3D, Coils	mobidb-lite, PF01765, TIGR00496, SSF55194, cd00520, G3DSA:1.10.132.20, PTHR20982, G3DSA:3.30.1360.40, Coil	consensus disorder prediction, Ribosome recycling factor, frr: ribosome recycling factor, RRF	IPR023584, IPR002661, IPR036191, IPR002661, IPR002661	Ribosome recycling factor domain, Ribosome recycling factor, RRF superfamily, Ribosome recycling factor, Ribosome recycling factor	GO:0002181, GO:0002184, GO:0003674, GO:0003676, GO:0003723, GO:0005488, GO:0005575, GO:0005618, GO:0005622, GO:0005623, GO:0005737, GO:0005829, GO:0005886, GO:0006412, GO:0006415, GO:0006518, GO:0006807, GO:0008079, GO:0008135, GO:0008150, GO:0008152, GO:0009058, GO:0009059, GO:0009987, GO:0010467, GO:0016020, GO:0016043, GO:0019538, GO:0022411, GO:0030312, GO:0032984, GO:0034641, GO:0034645, GO:…	Reactome: R-HSA-5419276, Reactome: R-HSA-5419276, Reactome: R-HSA-5419276, Reactome: R-HSA-5419276, Reactome: R-HSA-5419276,
scaffold_42151_1	1448389.BAVQ01000021_gene1690	1.6e-71	275.4												L	helicase	SUPERFAMILY, Gene3D	SSF53335, G3DSA:3.40.50.150		IPR029063	S-adenosyl-L-methionine-dependent methyltransferase
scaffold_42191_1	1448389.BAVQ01000080_gene475	4.2e-75	287.3	alaS	6.1.1.7	ko:K01872	ko00970,map00970	M00359,M00360	R03038	RC00055,RC00523	ko00000,ko00001,ko00002,ko01000,ko01007,ko03016				J	Catalyzes the attachment of alanine to tRNA(Ala) in a two-step reaction alanine is first activated by ATP to form Ala- AMP and then transferred to the acceptor end of tRNA(Ala). Also edits incorrectly charged Ser-tRNA(Ala) and Gly-tRNA(Ala) via its editing domain	PRINTS, PRINTS, Pfam, ProSiteProfiles, PANTHER, SUPERFAMILY	PR00980, PR00980, PF01411, PS50860, PTHR11777, SSF101353	Alanyl-tRNA synthetase signature, Alanyl-tRNA synthetase signature, tRNA synthetases class II (A), Alanyl-transfer RNA synthetases family profile.	IPR002318, IPR002318, IPR018164, IPR018165, IPR018162	Alanine-tRNA ligase, class IIc, Alanine-tRNA ligase, class IIc, Alanyl-tRNA synthetase, class IIc, N-terminal, Alanyl-tRNA synthetase, class IIc, core domain, Alanine-tRNA ligase, class IIc, anti-codon-binding domain superfamily	GO:0003674, GO:0003824, GO:0004812, GO:0004813, GO:0005488, GO:0005575, GO:0005618, GO:0005622, GO:0005623, GO:0005737, GO:0005829, GO:0005886, GO:0006082, GO:0006139, GO:0006396, GO:0006399, GO:0006400, GO:0006412, GO:0006418, GO:0006419, GO:0006518, GO:0006520, GO:0006725, GO:0006807, GO:0008033, GO:0008150, GO:0008152, GO:0009058, GO:0009059, GO:0009451, GO:0009987, GO:0010467, GO:0016020, GO:…	KEGG: 00970+6.1.1.7, KEGG: 00970+6.1.1.7, KEGG: 00970+6.1.1.7, KEGG: 00970+6.1.1.7, KEGG: 00970+6.1.1.7
scaffold_42198_1	1077144.AGFF01000024_gene424	1.5e-56	225.7			ko:K03453					ko00000	2.A.28			S	Bile acid	Pfam, PANTHER, TMHMM, TMHMM, TMHMM, PANTHER, TMHMM, Gene3D	PF01758, PTHR10361, TMhelix, TMhelix, TMhelix, PTHR10361:SF24, TMhelix, G3DSA:1.20.1530.20	Sodium Bile acid symporter family, Region of a membrane-bound protein predicted to be embedded in the membrane, Region of a membrane-bound protein predicted to be embedded in the membrane, Region of a membrane-bound protein predicted to be embedded in the membrane, Region of a membrane-bound protein predicted to be embedded in the membrane.	IPR002657, IPR004710, IPR038770	Bile acid:sodium symporter/arsenical resistance protein Acr3, Bile acid:sodium symporter, Sodium/solute symporter superfamily	GO:0016020
scaffold_42242_1	1448389.BAVQ01000090_gene2072	8.9e-55	219.5	bchI	6.6.1.1	ko:K03404,ko:K03405,ko:K13580	ko00860,ko01100,ko01110,map00860,map01100,map01110		R03877	RC01012	ko00000,ko00001,ko01000				H	von Willebrand factor type A	Gene3D, SUPERFAMILY	G3DSA:3.40.50.410, SSF53300		IPR036465, IPR036465	von Willebrand factor A-like domain superfamily, von Willebrand factor A-like domain superfamily
scaffold_42297_1	1448389.BAVQ01000002_gene3005	1e-76	292.7	leuS	6.1.1.4	ko:K01869	ko00970,map00970	M00359,M00360	R03657	RC00055,RC00523	ko00000,ko00001,ko00002,ko01000,ko01007,ko03016,ko03029				J	Belongs to the class-I aminoacyl-tRNA synthetase family	PANTHER, SUPERFAMILY, SUPERFAMILY, Gene3D	PTHR43740, SSF52374, SSF47323, G3DSA:1.10.730.10		IPR002302, IPR009080	Leucine-tRNA ligase, Aminoacyl-tRNA synthetase, class Ia, anticodon-binding	GO:0003674, GO:0003824, GO:0004812, GO:0004823, GO:0005575, GO:0005618, GO:0005622, GO:0005623, GO:0005737, GO:0005829, GO:0005886, GO:0006082, GO:0006139, GO:0006399, GO:0006412, GO:0006418, GO:0006429, GO:0006518, GO:0006520, GO:0006725, GO:0006807, GO:0008150, GO:0008152, GO:0009058, GO:0009059, GO:0009987, GO:0010467, GO:0016020, GO:0016070, GO:0016874, GO:0016875, GO:0019538, GO:0019752, GO:…	KEGG: 00970+6.1.1.4, Reactome: R-HSA-379726,
scaffold_42380_1	234621.RER_01180	2e-37	162.2														TMHMM, TMHMM	TMhelix, TMhelix	Region of a membrane-bound protein predicted to be embedded in the membrane, Region of a membrane-bound protein predicted to be embedded in the membrane.
scaffold_42453_1	1122130.AUHN01000009_gene668	1.1e-56	226.1			ko:K03924					ko00000,ko01000				S	associated with various cellular activities	Gene3D, Pfam, Pfam, SUPERFAMILY, Gene3D, PANTHER, PANTHER	G3DSA:3.40.50.300, PF17863, PF07726, SSF52540, G3DSA:1.10.8.300, PTHR42759, PTHR42759:SF1	AAA lid domain, ATPase family associated with various cellular activities (AAA)	IPR041628, IPR011703, IPR027417	ChlI/MoxR, AAA lid domain, ATPase, AAA-3, P-loop containing nucleoside triphosphate hydrolase	GO:0005524, GO:0016887	KEGG: 00860+6.6.1.1, MetaCyc: PWY-5531, MetaCyc: PWY-7159,
scaffold_42454_1	1448389.BAVQ01000084_gene31	6e-58	230.3	miaA	2.5.1.75	ko:K00791	ko00908,ko01100,ko01110,map00908,map01100,map01110		R01122	RC02820	ko00000,ko00001,ko01000,ko01006,ko03016				J	Catalyzes the transfer of a dimethylallyl group onto the adenine at position 37 in tRNAs that read codons beginning with uridine, leading to the formation of N6-(dimethylallyl)adenosine (i(6)A)	Gene3D, Gene3D, TMHMM, SignalP_GRAM_POSITIVE, SUPERFAMILY, Pfam, SignalP_EUK, PANTHER, PANTHER	G3DSA:1.10.20.140, G3DSA:3.40.50.300, TMhelix, SignalP-TM, SSF52540, PF01715, SignalP-noTM, PTHR11088:SF25, PTHR11088	Region of a membrane-bound protein predicted to be embedded in the membrane, IPP transferase	IPR027417, IPR018022, IPR039657	P-loop containing nucleoside triphosphate hydrolase, IPP transferase, Dimethylallyltransferase	GO:0003674, GO:0003824, GO:0006139, GO:0006396, GO:0006399, GO:0006400, GO:0006417, GO:0006725, GO:0006807, GO:0006950, GO:0008033, GO:0008150, GO:0008152, GO:0009266, GO:0009408, GO:0009451, GO:0009628, GO:0009889, GO:0009987, GO:0010467, GO:0010468, GO:0010556, GO:0010608, GO:0016070, GO:0016740, GO:0016765, GO:0019222, GO:0031323, GO:0031326, GO:0032268, GO:0033554, GO:0034248, GO:0034470, GO:…	KEGG: 00908+2.5.1.75, MetaCyc: PWY-2781, Reactome: R-HSA-6782315, Reactome: R-HSA-6787450, KEGG: 00908+2.5.1.75, MetaCyc: PWY-2781, Reactome: R-HSA-6782315, Reactome: R-HSA-6787450
scaffold_42530_1	1448389.BAVQ01000088_gene1155	1.6e-70	271.9			ko:K16048	ko00984,ko01100,map00984,map01100		R09819	RC00236	ko00000,ko00001,ko01000				K	PFAM flavin reductase domain protein, FMN-binding	Gene3D, Pfam, PANTHER, PANTHER, SUPERFAMILY, SMART	G3DSA:2.30.110.10, PF01613, PTHR30466:SF11, PTHR30466, SSF50475, SM00903	Flavin reductase like domain	IPR012349, IPR002563, IPR002563	FMN-binding split barrel, Flavin reductase like domain, Flavin reductase like domain	GO:0048037, GO:0010181, GO:0010181
scaffold_42580_1	1448389.BAVQ01000083_gene275	4.4e-68	263.8	nusA		ko:K02600					ko00000,ko03009,ko03021				K	Participates in both transcription termination and antitermination	PANTHER, Gene3D, Gene3D, Pfam, Pfam, SUPERFAMILY	PTHR22648, G3DSA:3.30.1480.10, G3DSA:2.40.50.140, PF08529, PF08529, SSF69705	NusA N-terminal domain, NusA N-terminal domain	IPR030842, IPR036555, IPR013735, IPR013735, IPR036555	Transcription termination/antitermination protein NusA, bacterial, NusA, N-terminal domain superfamily, Transcription factor NusA, N-terminal, Transcription factor NusA, N-terminal, NusA, N-terminal domain superfamily	GO:0003674, GO:0003676, GO:0003723, GO:0005488, GO:0005575, GO:0005618, GO:0005622, GO:0005623, GO:0005737, GO:0005829, GO:0005886, GO:0006355, GO:0008150, GO:0009889, GO:0010468, GO:0010556, GO:0016020, GO:0019219, GO:0019222, GO:0030312, GO:0031323, GO:0031326, GO:0031554, GO:0031564, GO:0040007, GO:0043244, GO:0044424, GO:0044444, GO:0044464, GO:0050789, GO:0050794, GO:0051128, GO:0051171, GO:…
scaffold_42595_1	1448389.BAVQ01000072_gene2550	1.5e-53	215.7	galM	5.1.3.3	ko:K01785	ko00010,ko00052,ko01100,ko01110,ko01120,ko01130,map00010,map00052,map01100,map01110,map01120,map01130	M00632	R01602,R10619	RC00563	ko00000,ko00001,ko00002,ko01000				G	Aldose 1-epimerase	Gene3D, SUPERFAMILY, Pfam	G3DSA:2.70.98.10, SSF74650, PF01263	Aldose 1-epimerase	IPR014718, IPR011013, IPR008183	Glycoside hydrolase-type carbohydrate-binding, Galactose mutarotase-like domain superfamily, Aldose 1-/Glucose-6-phosphate 1-epimerase	GO:0030246, GO:0003824, GO:0005975, GO:0030246, GO:0005975, GO:0016853
scaffold_42652_1	1095772.CAHH01000026_gene2514	5.9e-29	133.7	pdhC	2.3.1.12	ko:K00627	ko00010,ko00020,ko00620,ko01100,ko01110,ko01120,ko01130,ko01200,map00010,map00020,map00620,map01100,map01110,map01120,map01130,map01200	M00307	R00209,R02569	RC00004,RC02742,RC02857	br01601,ko00000,ko00001,ko00002,ko01000				C	Dihydrolipoamide acetyltransferase component of pyruvate dehydrogenase complex	ProSiteProfiles, MobiDBLite, Pfam, SUPERFAMILY, Gene3D	PS51826, mobidb-lite, PF02817, SSF47005, G3DSA:4.10.320.10	Peripheral subunit-binding (PSBD) domain profile, consensus disorder prediction, e3 binding domain	IPR004167, IPR004167, IPR036625, IPR036625	Peripheral subunit-binding domain, Peripheral subunit-binding domain, E3-binding domain superfamily, E3-binding domain superfamily	GO:0016746, GO:0016746, GO:0016746, GO:0016746	Reactome: R-HSA-389661, Reactome: R-HSA-389661, Reactome: R-HSA-389661, Reactome: R-HSA-389661
scaffold_42666_1	1448389.BAVQ01000006_gene3290	4.6e-58	230.7	qorB	1.6.5.2	ko:K19267	ko00130,ko01110,map00130,map01110		R02964,R03643,R03816	RC00819	ko00000,ko00001,ko01000				GM	PFAM NmrA family protein	SUPERFAMILY, Gene3D, PANTHER	SSF51735, G3DSA:3.40.50.720, PTHR47129		IPR036291	NAD(P)-binding domain superfamily
scaffold_42705_1	1448389.BAVQ01000070_gene2349	1e-36	159.8	eccC4		ko:K03466					ko00000,ko03036	3.A.12			D	DNA segregation ATPase FtsK SpoIIIE and related	MobiDBLite, Pfam, Gene3D, SUPERFAMILY, PANTHER, PANTHER	mobidb-lite, PF01580, G3DSA:3.40.50.300, SSF52540, PTHR22683:SF1, PTHR22683	consensus disorder prediction, FtsK/SpoIIIE family	IPR002543, IPR027417	FtsK domain, P-loop containing nucleoside triphosphate hydrolase	GO:0000166, GO:0003677, GO:0005524
scaffold_42749_1	1292020.H483_0107770	1.8e-20	104.4	ilvN	2.2.1.6	ko:K01653	ko00290,ko00650,ko00660,ko00770,ko01100,ko01110,ko01130,ko01210,ko01230,map00290,map00650,map00660,map00770,map01100,map01110,map01130,map01210,map01230	M00019,M00570	R00006,R00014,R00226,R03050,R04672,R04673,R08648	RC00027,RC00106,RC01192,RC02744,RC02893	ko00000,ko00001,ko00002,ko01000			iECO103_1326.ilvN,iJN678.ilvN	E	Acetolactate synthase	Gene3D, PANTHER, SUPERFAMILY, ProSiteProfiles, Pfam, TIGRFAM, CDD, PANTHER	G3DSA:3.30.70.260, PTHR30239, SSF55021, PS51671, PF01842, TIGR00119, cd04878, PTHR30239:SF0	ACT domain profile, ACT domain, acolac_sm: acetolactate synthase, small subunit, ACT_AHAS	IPR004789, IPR002912, IPR002912, IPR004789, IPR039557	Acetolactate synthase, small subunit, ACT domain, ACT domain, Acetolactate synthase, small subunit, AHAS, ACT domain	GO:0003674, GO:0003824, GO:0003984, GO:0005575, GO:0005618, GO:0005622, GO:0005623, GO:0005737, GO:0005829, GO:0005886, GO:0005948, GO:0006082, GO:0006520, GO:0006549, GO:0006573, GO:0006807, GO:0008150, GO:0008152, GO:0008652, GO:0009058, GO:0009081, GO:0009082, GO:0009097, GO:0009099, GO:0009987, GO:0016020, GO:0016053, GO:0016740, GO:0016744, GO:0019752, GO:0030312, GO:0032991, GO:0040007, GO:…	KEGG: 00290+2.2.1.6, KEGG: 00650+2.2.1.6, KEGG: 00660+2.2.1.6, KEGG: 00770+2.2.1.6, MetaCyc: PWY-5101, MetaCyc: PWY-5103, MetaCyc: PWY-5104, MetaCyc: PWY-5938, MetaCyc: PWY-5939, MetaCyc: PWY-6389, MetaCyc: PWY-7111, KEGG: 00290+2.2.1.6, KEGG: 00650+2.2.1.6, KEGG: 00660+2.2.1.6, KEGG: 00770+2.2.1.6, MetaCyc: PWY-5101, MetaCyc: PWY-5103, MetaCyc: PWY-5104, MetaCyc: PWY-5938, MetaCyc: PWY-5939, Met…
scaffold_42749_2	1077144.AGFF01000023_gene1143	6.5e-45	186.4	ilvB	2.2.1.6	ko:K01652	ko00290,ko00650,ko00660,ko00770,ko01100,ko01110,ko01130,ko01210,ko01230,map00290,map00650,map00660,map00770,map01100,map01110,map01130,map01210,map01230	M00019,M00570	R00006,R00014,R00226,R03050,R04672,R04673,R08648	RC00027,RC00106,RC01192,RC02744,RC02893	ko00000,ko00001,ko00002,ko01000			iNJ661.Rv3003c	E	Acetolactate synthase	Gene3D, SUPERFAMILY	G3DSA:3.40.50.970, SSF52518		IPR029061	Thiamin diphosphate-binding fold	GO:0000287, GO:0003674, GO:0003824, GO:0003984, GO:0005488, GO:0005575, GO:0005618, GO:0005623, GO:0006082, GO:0006520, GO:0006549, GO:0006573, GO:0006807, GO:0008150, GO:0008152, GO:0008652, GO:0009058, GO:0009081, GO:0009082, GO:0009097, GO:0009099, GO:0009987, GO:0016053, GO:0016740, GO:0016744, GO:0019752, GO:0019842, GO:0030312, GO:0030976, GO:0036094, GO:0040007, GO:0043167, GO:0043168, GO:…
scaffold_42752_1	1448389.BAVQ01000071_gene2440	3.8e-28	131.3	pks13		ko:K12437,ko:K13614,ko:K13615,ko:K15679					ko00000,ko01004,ko01008				Q	amino acid activation for nonribosomal peptide biosynthetic process	MobiDBLite	mobidb-lite	consensus disorder prediction
scaffold_42816_1	471856.Jden_2310	4.2e-39	167.5														SUPERFAMILY	SSF56563
scaffold_42944_1	1448389.BAVQ01000071_gene2434	2e-61	241.9	aftA	2.4.2.46	ko:K13686					ko00000,ko01000,ko01003		GT85		S	capsule polysaccharide biosynthetic process	TMHMM, TMHMM, TMHMM, TMHMM, Pfam	TMhelix, TMhelix, TMhelix, TMhelix, PF12250	Region of a membrane-bound protein predicted to be embedded in the membrane, Region of a membrane-bound protein predicted to be embedded in the membrane, Region of a membrane-bound protein predicted to be embedded in the membrane, Region of a membrane-bound protein predicted to be embedded in the membrane, Arabinofuranosyltransferase N terminal	IPR020963	Arabinofuranosyltransferase AftA, N-terminal	GO:0003674, GO:0003824, GO:0005575, GO:0005618, GO:0005623, GO:0005886, GO:0008150, GO:0008152, GO:0008194, GO:0008378, GO:0009058, GO:0009059, GO:0009273, GO:0009987, GO:0016020, GO:0016043, GO:0016740, GO:0016757, GO:0016758, GO:0022607, GO:0030312, GO:0034645, GO:0035250, GO:0040007, GO:0042546, GO:0043170, GO:0044036, GO:0044038, GO:0044085, GO:0044237, GO:0044249, GO:0044260, GO:0044464, GO:…	KEGG: 00572+2.4.2.46, MetaCyc: PWY-6397
scaffold_42947_1	1077144.AGFF01000024_gene362	4.6e-82	310.5	tgs3	2.3.1.20	ko:K00635	ko00561,ko01100,map00561,map01100	M00089	R02251	RC00004,RC00041	ko00000,ko00001,ko00002,ko01000				Q	Belongs to the long-chain O-acyltransferase family	Pfam, PANTHER, PANTHER, SUPERFAMILY	PF03007, PTHR31650:SF1, PTHR31650, SSF52777	Wax ester synthase-like Acyl-CoA acyltransferase domain	IPR004255	O-acyltransferase, WSD1, N-terminal	GO:0000302, GO:0001666, GO:0003674, GO:0003824, GO:0004144, GO:0005575, GO:0005618, GO:0005623, GO:0005886, GO:0006629, GO:0006638, GO:0006639, GO:0006641, GO:0006950, GO:0006979, GO:0008150, GO:0008152, GO:0008374, GO:0008610, GO:0009058, GO:0009628, GO:0009987, GO:0010035, GO:0016020, GO:0016411, GO:0016740, GO:0016746, GO:0016747, GO:0019432, GO:0030312, GO:0036293, GO:0040007, GO:0042221, GO:…	KEGG: 00073+2.3.1.20, KEGG: 00561+2.3.1.20,
scaffold_42952_1	1095772.CAHH01000042_gene1189	1.5e-29	135.2	merR2											K	transcriptional regulator	MobiDBLite, Gene3D, MobiDBLite, SUPERFAMILY, Pfam, PANTHER, PANTHER	mobidb-lite, G3DSA:1.10.1660.10, mobidb-lite, SSF46955, PF13411, PTHR30204, PTHR30204:SF3	consensus disorder prediction, consensus disorder prediction, MerR HTH family regulatory protein	IPR009061, IPR000551	Putative DNA-binding domain superfamily, MerR-type HTH domain	GO:0003677, GO:0006355
scaffold_42991_1	1095772.CAHH01000075_gene1502	3.9e-26	124	aspT											EK	COG1167 Transcriptional regulators containing a DNA-binding HTH domain and an aminotransferase domain (MocR family) and their eukaryotic orthologs	Coils, Pfam, Gene3D, Gene3D	Coil, PF12897, G3DSA:3.90.1150.10, G3DSA:3.40.640.10	Alanine-glyoxylate amino-transferase	IPR024551, IPR015422, IPR015421	Aminotransferase, putative, Pyridoxal phosphate-dependent transferase domain 1, Pyridoxal phosphate-dependent transferase, major domain	GO:0003824, GO:0003824
scaffold_43041_1	1122130.AUHN01000009_gene525	4.3e-80	303.9	rplB		ko:K02886	ko03010,map03010	M00178,M00179			br01610,ko00000,ko00001,ko00002,ko03011				J	One of the primary rRNA binding proteins. Required for association of the 30S and 50S subunits to form the 70S ribosome, for tRNA binding and peptide bond formation. It has been suggested to have peptidyltransferase activity	Pfam, ProSitePatterns, Pfam, SUPERFAMILY, Gene3D, SMART, PANTHER, Gene3D, Gene3D, PANTHER, SUPERFAMILY, TIGRFAM, SMART	PF00181, PS00467, PF03947, SSF50249, G3DSA:2.40.50.140, SM01382, PTHR13691, G3DSA:4.10.950.10, G3DSA:2.30.30.30, PTHR13691:SF5, SSF50104, TIGR01171, SM01383	Ribosomal Proteins L2, RNA binding domain, Ribosomal protein L2 signature, Ribosomal Proteins L2, C-terminal domain, rplB_bact: ribosomal protein uL2	IPR022666, IPR022671, IPR022669, IPR012340, IPR022669, IPR002171, IPR014726, IPR014722, IPR008991, IPR005880, IPR002171	Ribosomal Proteins L2, RNA binding domain, Ribosomal protein L2, conserved site, Ribosomal protein L2, C-terminal, Nucleic acid-binding, OB-fold, Ribosomal protein L2, C-terminal, Ribosomal protein L2, Ribosomal protein L2, domain 3, Ribosomal protein L2, domain 2, Translation protein SH3-like domain superfamily, Ribosomal protein L2, bacterial/organellar-type, Ribosomal protein L2	GO:0000027, GO:0002181, GO:0003674, GO:0003676, GO:0003723, GO:0003735, GO:0005198, GO:0005488, GO:0005575, GO:0005622, GO:0005623, GO:0005737, GO:0005829, GO:0005840, GO:0005886, GO:0006412, GO:0006518, GO:0006807, GO:0006996, GO:0008150, GO:0008152, GO:0008270, GO:0009058, GO:0009059, GO:0009987, GO:0010467, GO:0015934, GO:0016020, GO:0016043, GO:0019538, GO:0022607, GO:0022613, GO:0022618, GO:…	Reactome: R-HSA-156827, Reactome: R-HSA-156902, Reactome: R-HSA-1799339, Reactome: R-HSA-192823, Reactome: R-HSA-2408557, Reactome: R-HSA-6791226, Reactome: R-HSA-72689, Reactome: R-HSA-72706, Reactome: R-HSA-72764, Reactome: R-HSA-9010553, Reactome: R-HSA-975956, Reactome: R-HSA-975957, Reactome: R-HSA-156827, Reactome: R-HSA-156902, Reactome: R-HSA-1799339, Reactome: R-HSA-192823, Reactome: R-H…
scaffold_43111_1	1463858.JOHR01000008_gene3221	6.6e-16	90.5														NA	NA	NA	NA	NA	na	NA
scaffold_43177_1	1448389.BAVQ01000036_gene839	5.3e-45	186.8	cvpA											O	Trypsin-like serine proteases, typically periplasmic, contain C-terminal PDZ domain	SUPERFAMILY, PANTHER, Gene3D, PANTHER	SSF50494, PTHR43019:SF36, G3DSA:2.40.10.10, PTHR43019		IPR009003	Peptidase S1, PA clan	GO:0005575, GO:0005576, GO:0005618, GO:0005623, GO:0005886, GO:0005887, GO:0008150, GO:0009268, GO:0009405, GO:0009628, GO:0010447, GO:0016020, GO:0016021, GO:0030312, GO:0031224, GO:0031226, GO:0044419, GO:0044425, GO:0044459, GO:0044464, GO:0050896, GO:0051704, GO:0071944
scaffold_43177_2	1448389.BAVQ01000036_gene842	9.1e-10	68.6												I	Alpha beta hydrolase	Gene3D, SUPERFAMILY	G3DSA:3.40.50.1820, SSF53474		IPR029058, IPR029058	Alpha/Beta hydrolase fold, Alpha/Beta hydrolase fold
scaffold_43185_1	1448389.BAVQ01000070_gene2302	6.2e-57	226.9	ackA	2.7.2.1,2.7.2.15	ko:K00925,ko:K19697	ko00430,ko00620,ko00640,ko00680,ko00720,ko01100,ko01120,ko01200,map00430,map00620,map00640,map00680,map00720,map01100,map01120,map01200	M00357,M00579	R00315,R01353	RC00002,RC00043	ko00000,ko00001,ko00002,ko01000			iAF987.Gmet_1034,iIT341.HP0903m,iNJ661.Rv0409	C	Catalyzes the formation of acetyl phosphate from acetate and ATP. Can also catalyze the reverse reaction	Pfam, PANTHER, Gene3D, PRINTS, PRINTS, PRINTS, SUPERFAMILY	PF00871, PTHR21060, G3DSA:3.30.420.40, PR00471, PR00471, PR00471, SSF53067	Acetokinase family, Acetate kinase family signature, Acetate kinase family signature, Acetate kinase family signature	IPR000890, IPR000890, IPR000890, IPR000890, IPR000890	Aliphatic acid kinase, short-chain, Aliphatic acid kinase, short-chain, Aliphatic acid kinase, short-chain, Aliphatic acid kinase, short-chain, Aliphatic acid kinase, short-chain	GO:0005575, GO:0005622, GO:0005623, GO:0005737, GO:0006082, GO:0006083, GO:0008150, GO:0008152, GO:0009058, GO:0009987, GO:0016053, GO:0016999, GO:0017000, GO:0017144, GO:0019413, GO:0019752, GO:0032787, GO:0043436, GO:0044237, GO:0044249, GO:0044281, GO:0044283, GO:0044424, GO:0044464, GO:0046394, GO:0071704, GO:0072330, GO:1901576GO:0016301, GO:0016310, GO:0016774, GO:0016301, GO:0016310, GO:00…	KEGG: 00430+2.7.2.1, KEGG: 00620+2.7.2.1, KEGG: 00640+2.7.2.1, KEGG: 00680+2.7.2.1, KEGG: 00720+2.7.2.1, MetaCyc: PWY-5482, MetaCyc: PWY-5485, MetaCyc: PWY-5497, MetaCyc: PWY-8015, KEGG: 00430+2.7.2.1, KEGG: 00620+2.7.2.1, KEGG: 00640+2.7.2.1, KEGG: 00680+2.7.2.1, KEGG: 00720+2.7.2.1, MetaCyc: PWY-5482, MetaCyc: PWY-5485, MetaCyc: PWY-5497, MetaCyc: PWY-8015, KEGG: 00430+2.7.2.1, KEGG: 00620+2.7.…
scaffold_43226_1	1448389.BAVQ01000003_gene3560	1.2e-25	122.1	dgt	3.1.5.1	ko:K01129	ko00230,map00230		R01856	RC00017	ko00000,ko00001,ko01000				F	Deoxyguanosinetriphosphate triphosphohydrolase-like protein	Gene3D, MobiDBLite, MobiDBLite, PANTHER, PANTHER, MobiDBLite, SUPERFAMILY	G3DSA:1.10.3210.10, mobidb-lite, mobidb-lite, PTHR11373:SF32, PTHR11373, mobidb-lite, SSF109604	consensus disorder prediction, consensus disorder prediction, consensus disorder prediction			GO:0003674, GO:0003824, GO:0005575, GO:0005623, GO:0005886, GO:0006139, GO:0006163, GO:0006195, GO:0006203, GO:0006725, GO:0006753, GO:0006793, GO:0006796, GO:0006807, GO:0008150, GO:0008152, GO:0008832, GO:0009056, GO:0009058, GO:0009117, GO:0009141, GO:0009143, GO:0009144, GO:0009146, GO:0009151, GO:0009155, GO:0009166, GO:0009200, GO:0009204, GO:0009215, GO:0009217, GO:0009262, GO:0009264, GO:…
scaffold_43226_2	1448389.BAVQ01000003_gene3561	7.8e-32	142.5												S	DUF218 domain	NA	NA	NA	NA	NA	na	NA
scaffold_43273_1	1095772.CAHH01000058_gene1439	1.1e-72	279.3	ispG	1.17.7.1,1.17.7.3	ko:K03526	ko00900,ko01100,ko01110,ko01130,map00900,map01100,map01110,map01130	M00096	R08689,R10859	RC01486	ko00000,ko00001,ko00002,ko01000			iHN637.CLJU_RS06430,iJN678.gcpE	I	Converts 2C-methyl-D-erythritol 2,4-cyclodiphosphate (ME-2,4cPP) into 1-hydroxy-2-methyl-2-(E)-butenyl 4-diphosphate	PANTHER, Gene3D, SUPERFAMILY, Pfam, PANTHER	PTHR30454, G3DSA:3.20.20.20, SSF51395, PF04551, PTHR30454:SF0	GcpE protein	IPR004588, IPR011005, IPR004588	4-hydroxy-3-methylbut-2-en-1-yl diphosphate synthase, bacterial-type, Dihydropteroate synthase-like, 4-hydroxy-3-methylbut-2-en-1-yl diphosphate synthase, bacterial-type	GO:0003674, GO:0003824, GO:0005488, GO:0006081, GO:0006082, GO:0006090, GO:0006091, GO:0006629, GO:0006644, GO:0006720, GO:0006793, GO:0006796, GO:0008150, GO:0008152, GO:0008299, GO:0008610, GO:0008654, GO:0009055, GO:0009058, GO:0009240, GO:0009987, GO:0016491, GO:0016725, GO:0019288, GO:0019637, GO:0019682, GO:0019752, GO:0022900, GO:0032787, GO:0043436, GO:0044237, GO:0044238, GO:0044249, GO:…	KEGG: 00900+1.17.7.3, Reactome: R-HSA-156581, Reactome: R-HSA-1614635, Reactome: R-HSA-196741, Reactome: R-HSA-3359467, Reactome: R-HSA-3359469, KEGG: 00900+1.17.7.3,
scaffold_43292_1	1448389.BAVQ01000009_gene3796	6.6e-49	200.3	gcvT	2.1.2.10	ko:K00605	ko00260,ko00630,ko00670,ko01100,ko01110,ko01130,ko01200,map00260,map00630,map00670,map01100,map01110,map01130,map01200	M00532	R01221,R02300,R04125	RC00022,RC00069,RC00183,RC02834	ko00000,ko00001,ko00002,ko01000			iSFV_1184.SFV_2953	E	The glycine cleavage system catalyzes the degradation of glycine	SUPERFAMILY, Pfam, PANTHER, Gene3D, Gene3D, Gene3D	SSF103025, PF01571, PTHR43757, G3DSA:3.30.1360.120, G3DSA:4.10.1250.10, G3DSA:3.30.70.1400	Aminomethyltransferase folate-binding domain	IPR006222, IPR027266	Aminomethyltransferase, folate-binding domain, GTP-binding protein TrmE/Glycine cleavage system T protein, domain 1	GO:0001505, GO:0003674, GO:0003824, GO:0004047, GO:0005575, GO:0005622, GO:0005623, GO:0005737, GO:0005829, GO:0006082, GO:0006520, GO:0006544, GO:0006546, GO:0006807, GO:0008150, GO:0008152, GO:0008168, GO:0009056, GO:0009063, GO:0009069, GO:0009071, GO:0009987, GO:0016054, GO:0016740, GO:0016741, GO:0017144, GO:0019464, GO:0019752, GO:0032259, GO:0042133, GO:0042135, GO:0042737, GO:0043436, GO:…
scaffold_43385_1	1448389.BAVQ01000067_gene2111	3.4e-31	140.6			ko:K07493					ko00000				L	Transposase	PANTHER, PANTHER, Pfam	PTHR33217:SF7, PTHR33217, PF00872	Transposase, Mutator family	IPR001207, IPR001207	Transposase, mutator type, Transposase, mutator type	GO:0003677, GO:0004803, GO:0006313, GO:0003677, GO:0004803, GO:0006313
scaffold_43404_1	1448389.BAVQ01000003_gene3366	1e-60	239.2	plsC	2.3.1.51,3.1.3.3	ko:K00655,ko:K07003,ko:K15781	ko00561,ko00564,ko01100,ko01110,map00561,map00564,map01100,map01110	M00089	R02241,R09381	RC00004,RC00037,RC00039	ko00000,ko00001,ko00002,ko01000,ko01004				E	HAD-superfamily subfamily IB hydrolase, TIGR01490	Gene3D, Pfam, SUPERFAMILY, Gene3D	G3DSA:1.20.1440.100, PF12710, SSF56784, G3DSA:3.40.50.1000	haloacid dehalogenase-like hydrolase	IPR036412, IPR023214	HAD-like superfamily, HAD superfamily	GO:0003674, GO:0003824, GO:0003841, GO:0005575, GO:0005623, GO:0005886, GO:0006629, GO:0006644, GO:0006650, GO:0006793, GO:0006796, GO:0008150, GO:0008152, GO:0008374, GO:0008610, GO:0008654, GO:0009058, GO:0009987, GO:0016020, GO:0016411, GO:0016740, GO:0016746, GO:0016747, GO:0019637, GO:0042171, GO:0044237, GO:0044238, GO:0044249, GO:0044255, GO:0044464, GO:0045017, GO:0046474, GO:0046486, GO:…
scaffold_43535_1	1292020.H483_0104440	4.1e-18	97.8	surf1		ko:K14998					ko00000,ko03029	3.D.4.8			S	SURF1-like protein	TMHMM, MobiDBLite	TMhelix, mobidb-lite	Region of a membrane-bound protein predicted to be embedded in the membrane, consensus disorder prediction			GO:0005575, GO:0005618, GO:0005623, GO:0008150, GO:0030312, GO:0040007, GO:0044110, GO:0044116, GO:0044117, GO:0044119, GO:0044403, GO:0044419, GO:0044464, GO:0051704, GO:0071944
scaffold_43545_1	1448389.BAVQ01000070_gene2330	2.6e-16	90.1	def	3.5.1.88	ko:K01462					ko00000,ko01000				J	Removes the formyl group from the N-terminal Met of newly synthesized proteins. Requires at least a dipeptide for an efficient rate of reaction. N-terminal L-methionine is a prerequisite for activity but the enzyme has broad specificity at other positions	NA	NA	NA	NA	NA	GO:0003674, GO:0003824, GO:0006464, GO:0006807, GO:0008150, GO:0008152, GO:0009987, GO:0016787, GO:0016810, GO:0016811, GO:0018193, GO:0018206, GO:0019538, GO:0031365, GO:0035601, GO:0036211, GO:0040007, GO:0042586, GO:0043170, GO:0043412, GO:0043686, GO:0044237, GO:0044238, GO:0044260, GO:0044267, GO:0071704, GO:0098732, GO:1901564na	NA
scaffold_43545_2	1448389.BAVQ01000070_gene2329	1.1e-26	125.9	yobR	2.3.1.1	ko:K22476	ko00220,ko01210,ko01230,map00220,map01210,map01230		R00259	RC00004,RC00064	ko00000,ko00001,ko01000				K	acetyltransferase	NA	NA	NA	NA	NA	GO:0003674, GO:0003824, GO:0004596, GO:0005575, GO:0005622, GO:0005623, GO:0006464, GO:0006473, GO:0006474, GO:0006807, GO:0008080, GO:0008150, GO:0008152, GO:0009987, GO:0010467, GO:0016407, GO:0016410, GO:0016740, GO:0016746, GO:0016747, GO:0019538, GO:0031248, GO:0031365, GO:0032991, GO:0034212, GO:0036211, GO:0043170, GO:0043412, GO:0043543, GO:0044237, GO:0044238, GO:0044260, GO:0044267, GO:…	NA
scaffold_43567_1	1448389.BAVQ01000080_gene326	2.3e-54	218.4	pafC		ko:K13573					ko00000,ko03051				K	transcriptional regulator	PANTHER, Pfam, PANTHER, Coils	PTHR34580, PF13280, PTHR34580:SF3, Coil	WYL domain	IPR026881	WYL domain	GO:0005575, GO:0005618, GO:0005623, GO:0030312, GO:0044464, GO:0071944
scaffold_43601_1	1448389.BAVQ01000030_gene680	1.7e-57	228.8												T	Histidine kinase	PANTHER, TMHMM, TMHMM, Pfam, PANTHER	PTHR24421, TMhelix, TMhelix, PF07730, PTHR24421:SF10	Region of a membrane-bound protein predicted to be embedded in the membrane, Region of a membrane-bound protein predicted to be embedded in the membrane, Histidine kinase	IPR011712	Signal transduction histidine kinase, subgroup 3, dimerisation and phosphoacceptor domain	GO:0000155, GO:0000160, GO:0016021, GO:0046983
scaffold_43648_1	1448389.BAVQ01000003_gene3365	3.5e-66	257.7	plsB	2.3.1.15	ko:K00631	ko00561,ko00564,ko01100,ko01110,map00561,map00564,map01100,map01110	M00089	R00851,R09380	RC00004,RC00039,RC00041	ko00000,ko00001,ko00002,ko01000,ko01004				I	Belongs to the GPAT DAPAT family	NA	NA	NA	NA	NA	na	NA
scaffold_43686_1	471856.Jden_2546	4.3e-24	117.9												KLT	serine threonine protein kinase	Gene3D	G3DSA:1.10.510.10
scaffold_43691_1	446469.Sked_11360	8.9e-54	216.5	cydD		ko:K02068,ko:K16013	ko02010,map02010	M00211			ko00000,ko00001,ko00002,ko02000	3.A.1.129			V	ABC transporter CydDC cysteine exporter (CydDC-E) family permease ATP-binding protein CydD	CDD, Pfam, TMHMM, SUPERFAMILY, Gene3D, TMHMM, ProSiteProfiles, PANTHER, PANTHER, TMHMM, TMHMM	cd18584, PF00664, TMhelix, SSF90123, G3DSA:1.20.1560.10, TMhelix, PS50929, PTHR24221:SF261, PTHR24221, TMhelix, TMhelix	ABC_6TM_AarD_CydD, ABC transporter transmembrane region, Region of a membrane-bound protein predicted to be embedded in the membrane, Region of a membrane-bound protein predicted to be embedded in the membrane, ABC transporter integral membrane type-1 fused domain profile, Region of a membrane-bound protein predicted to be embedded in the membrane, Region of a membrane-bound protein predicted to …	IPR011527, IPR036640, IPR036640, IPR011527, IPR039421	ABC transporter type 1, transmembrane domain, ABC transporter type 1, transmembrane domain superfamily, ABC transporter type 1, transmembrane domain superfamily, ABC transporter type 1, transmembrane domain, Type I protein exporter	GO:0005524, GO:0016021, GO:0042626, GO:0055085, GO:0005524, GO:0016021, GO:0005524, GO:0016021, GO:0005524, GO:0016021, GO:0042626, GO:0055085
scaffold_43700_1	1448389.BAVQ01000036_gene898	9.7e-61	239.6												S	Oxidoreductase	Pfam, Pfam, Gene3D, PANTHER, SUPERFAMILY	PF10728, PF10727, G3DSA:3.40.50.720, PTHR40459, SSF51735	Domain of unknown function (DUF2520), Rossmann-like domain	IPR018931, IPR019665, IPR036291	Domain of unknown function DUF2520, Putative oxidoreductase/dehydrogenase, Rossmann-like domain, NAD(P)-binding domain superfamily
scaffold_43752_1	1448389.BAVQ01000043_gene1830	1.9e-19	100.9	smpB		ko:K03664					ko00000				O	the 2 termini fold to resemble tRNA(Ala) and it encodes a tag peptide , a short internal open reading frame. During trans-translation Ala- aminoacylated tmRNA acts like a tRNA, entering the A-site of stalled ribosomes, displacing the stalled mRNA. The ribosome then switches to translate the ORF on the tmRNA	SUPERFAMILY, Pfam, PANTHER	SSF74982, PF01668, PTHR30308	SmpB protein	IPR023620, IPR000037, IPR000037	Small protein B, SsrA-binding protein, SsrA-binding protein	GO:0003674, GO:0003676, GO:0003723, GO:0005488, GO:0005575, GO:0005622, GO:0005623, GO:0005737, GO:0005829, GO:0006464, GO:0006807, GO:0008150, GO:0008152, GO:0009987, GO:0019538, GO:0036211, GO:0043170, GO:0043412, GO:0044237, GO:0044238, GO:0044260, GO:0044267, GO:0044424, GO:0044444, GO:0044464, GO:0070930, GO:0071704, GO:0097159, GO:1901363, GO:1901564GO:0003723, GO:0003723
scaffold_43753_1	1448389.BAVQ01000036_gene914	1.1e-77	295.8	cah	4.2.1.1	ko:K01673	ko00910,map00910		R00132,R10092	RC02807	ko00000,ko00001,ko01000				P	reversible hydration of carbon dioxide	PANTHER, SUPERFAMILY, PANTHER, SMART, Gene3D, Pfam, ProSitePatterns	PTHR11002, SSF53056, PTHR11002:SF17, SM00947, G3DSA:3.40.1050.10, PF00484, PS00705	Carbonic anhydrase, Prokaryotic-type carbonic anhydrases signature 2.	IPR036874, IPR001765, IPR036874, IPR001765, IPR015892	Carbonic anhydrase superfamily, Carbonic anhydrase, Carbonic anhydrase superfamily, Carbonic anhydrase, Carbonic anhydrase, prokaryotic-like, conserved site	GO:0003674, GO:0003824, GO:0004089, GO:0005488, GO:0008270, GO:0016829, GO:0016835, GO:0016836, GO:0043167, GO:0043169, GO:0046872, GO:0046914GO:0004089, GO:0008270, GO:0004089, GO:0008270, GO:0004089, GO:0008270, GO:0004089, GO:0008270, GO:0004089, GO:0008270, GO:0015976	KEGG: 00910+4.2.1.1, MetaCyc: PWY-241, MetaCyc: PWY-5743, MetaCyc: PWY-5744, MetaCyc: PWY-5789, MetaCyc: PWY-6142, MetaCyc: PWY-7115, MetaCyc: PWY-7117, KEGG: 00910+4.2.1.1, MetaCyc: PWY-241, MetaCyc: PWY-5743, MetaCyc: PWY-5744, MetaCyc: PWY-5789, MetaCyc: PWY-6142, MetaCyc: PWY-7115, MetaCyc: PWY-7117, KEGG: 00910+4.2.1.1, MetaCyc: PWY-241, MetaCyc: PWY-5743, MetaCyc: PWY-5744, MetaCyc: PWY-578…
scaffold_43773_1	1435356.Y013_10435	1.6e-71	275.4		2.1.1.14	ko:K00549	ko00270,ko00450,ko01100,ko01110,ko01230,map00270,map00450,map01100,map01110,map01230	M00017	R04405,R09365	RC00035,RC00113,RC01241	ko00000,ko00001,ko00002,ko01000				E	Methionine synthase	SUPERFAMILY, Gene3D	SSF51726, G3DSA:3.20.20.210		IPR038071, IPR038071	UROD/MetE-like superfamily, UROD/MetE-like superfamily		Reactome: R-HSA-189451, Reactome: R-HSA-189451
scaffold_43786_1	1448389.BAVQ01000080_gene381	1.5e-18	99														MobiDBLite	mobidb-lite	consensus disorder prediction
scaffold_43805_1	1448389.BAVQ01000023_gene1435	5.5e-56	223.4												M	Sulfotransferase family	SUPERFAMILY, Pfam, PANTHER, PANTHER, Gene3D	SSF52540, PF13469, PTHR36451:SF2, PTHR36451, G3DSA:3.40.50.300	Sulfotransferase family	IPR027417	P-loop containing nucleoside triphosphate hydrolase
scaffold_43805_2	1229780.BN381_170011	1.1e-07	61.2														NA	NA	NA	NA	NA	na	NA
scaffold_43818_1	1448389.BAVQ01000072_gene2755	3.1e-75	287.7	tsaD	2.3.1.234	ko:K01409,ko:K03070	ko02024,ko03060,ko03070,map02024,map03060,map03070	M00335	R10648	RC00070,RC00416	ko00000,ko00001,ko00002,ko01000,ko02044,ko03016	3.A.5.1,3.A.5.10,3.A.5.2,3.A.5.4			O	Required for the formation of a threonylcarbamoyl group on adenosine at position 37 (t(6)A37) in tRNAs that read codons beginning with adenine. Is involved in the transfer of the threonylcarbamoyl moiety of threonylcarbamoyl-AMP (TC-AMP) to the N6 group of A37, together with TsaE and TsaB. TsaD likely plays a direct catalytic role in this reaction	Pfam, PANTHER, PANTHER, Gene3D, PRINTS, PRINTS, SUPERFAMILY	PF00814, PTHR11735:SF6, PTHR11735, G3DSA:3.30.420.40, PR00789, PR00789, SSF53067	Glycoprotease family, O-sialoglycoprotein endopeptidase (M22) metallo-protease family signature, O-sialoglycoprotein endopeptidase (M22) metallo-protease family signature	IPR000905, IPR022450, IPR000905, IPR017861, IPR017861	Gcp-like domain, tRNA N6-adenosine threonylcarbamoyltransferase, TsaD, Gcp-like domain, Kae1/TsaD family, Kae1/TsaD family	GO:0000287, GO:0000408, GO:0002949, GO:0003674, GO:0003824, GO:0004175, GO:0004222, GO:0005488, GO:0005506, GO:0005515, GO:0005575, GO:0005622, GO:0005623, GO:0005737, GO:0005829, GO:0006139, GO:0006396, GO:0006399, GO:0006400, GO:0006508, GO:0006725, GO:0006807, GO:0008033, GO:0008150, GO:0008152, GO:0008233, GO:0008237, GO:0009451, GO:0009987, GO:0010467, GO:0016070, GO:0016787, GO:0019538, GO:…
scaffold_43846_1	1448389.BAVQ01000083_gene247	6.8e-51	206.5	pyrH	2.7.4.22	ko:K09903	ko00240,ko01100,map00240,map01100		R00158	RC00002	ko00000,ko00001,ko01000			iSB619.SA_RS06240	F	Catalyzes the reversible phosphorylation of UMP to UDP	Pfam, SUPERFAMILY, Gene3D, PANTHER, PANTHER	PF00696, SSF53633, G3DSA:3.40.1160.10, PTHR42833:SF4, PTHR42833	Amino acid kinase family	IPR001048, IPR036393, IPR036393	Aspartate/glutamate/uridylate kinase, Acetylglutamate kinase-like superfamily, Acetylglutamate kinase-like superfamily	GO:0000287, GO:0003674, GO:0003824, GO:0005488, GO:0005575, GO:0005623, GO:0005886, GO:0006139, GO:0006213, GO:0006220, GO:0006221, GO:0006225, GO:0006725, GO:0006753, GO:0006793, GO:0006796, GO:0006807, GO:0008150, GO:0008152, GO:0009041, GO:0009058, GO:0009116, GO:0009117, GO:0009119, GO:0009123, GO:0009132, GO:0009133, GO:0009138, GO:0009139, GO:0009163, GO:0009165, GO:0009185, GO:0009188, GO:…	Reactome: R-HSA-8964539,
scaffold_43872_1	680198.SCAB_64881	9.6e-16	90.1												S	Phage portal protein	Pfam	PF04860	Phage portal protein	IPR006944	Bacteriophage/Gene transfer agent portal protein
scaffold_43900_1	1246445.ANAY01000015_gene2493	8.9e-16	89	mvaA	1.1.1.34,1.1.1.88,2.3.1.9	ko:K00021,ko:K00054,ko:K00626	ko00071,ko00072,ko00280,ko00310,ko00362,ko00380,ko00620,ko00630,ko00640,ko00650,ko00720,ko00900,ko01100,ko01110,ko01120,ko01130,ko01200,ko01212,ko02020,ko04152,ko04976,map00071,map00072,map00280,map00310,map00362,map00380,map00620,map00630,map00640,map00650,map00720,map00900,map01100,map01110,map01120,map01130,map01200,map01212,map02020,map04152,map04976	M00088,M00095,M00373,M00374,M00375	R00238,R01177,R02081,R02082	RC00004,RC00326,RC00644	ko00000,ko00001,ko00002,ko01000,ko04147				I	Belongs to the HMG-CoA reductase family	PANTHER, Gene3D, PANTHER, SUPERFAMILY	PTHR10572, G3DSA:1.10.8.660, PTHR10572:SF13, SSF56542		IPR002202, IPR004553, IPR009029	Hydroxymethylglutaryl-CoA reductase, class I/II, Hydroxymethylglutaryl-CoA reductase, bacterial-type, Hydroxymethylglutaryl-CoA reductase, class I/II, substrate-binding domain superfamily	GO:0004420, GO:0015936, GO:0050662, GO:0055114, GO:0015936, GO:0016616, GO:0050662, GO:0015936, GO:0016616, GO:0050662, GO:0055114	KEGG: 00900+1.1.1.34, MetaCyc: PWY-6174, MetaCyc: PWY-7391, MetaCyc: PWY-7524, MetaCyc: PWY-922, Reactome: R-HSA-191273, Reactome: R-HSA-1989781, Reactome: R-HSA-2426168, KEGG: 00900+1.1.1.34, MetaCyc: PWY-6174, MetaCyc: PWY-7391, MetaCyc: PWY-7524, MetaCyc: PWY-922, Reactome: R-HSA-191273, Reactome: R-HSA-1989781, Reactome: R-HSA-2426168
scaffold_43972_1	1448389.BAVQ01000004_gene3697	1.7e-60	238.8	gabD	1.2.1.16,1.2.1.20,1.2.1.79	ko:K00135	ko00250,ko00310,ko00350,ko00650,ko00760,ko01100,ko01120,map00250,map00310,map00350,map00650,map00760,map01100,map01120	M00027	R00713,R00714,R02401	RC00080	ko00000,ko00001,ko00002,ko01000				C	Belongs to the aldehyde dehydrogenase family	Gene3D, PANTHER, SUPERFAMILY, Pfam	G3DSA:3.40.309.10, PTHR43217, SSF53720, PF00171	Aldehyde dehydrogenase family	IPR016163, IPR016161, IPR015590	Aldehyde dehydrogenase, C-terminal, Aldehyde/histidinol dehydrogenase, Aldehyde dehydrogenase domain	GO:0016491, GO:0016620, GO:0055114, GO:0016491, GO:0055114, GO:0016491, GO:0055114
scaffold_43978_1	67275.JOAP01000043_gene7754	4.6e-34	151	terL											L	phage terminase	PANTHER, Pfam, Gene3D	PTHR41287, PF03354, G3DSA:3.40.50.300	Phage Terminase	IPR005021, IPR005021	Terminase large subunit, Lambdalikevirus-type, Terminase large subunit, Lambdalikevirus-type
scaffold_44037_1	471856.Jden_0520	5e-65	253.8		3.1.3.3,3.1.3.73	ko:K02226,ko:K22305	ko00260,ko00680,ko00860,ko01100,ko01120,ko01130,map00260,map00680,map00860,map01100,map01120,map01130	M00122	R00582,R04594,R11173	RC00017	ko00000,ko00001,ko00002,ko01000				G	phosphoglycerate mutase	PANTHER, Gene3D, PANTHER, SUPERFAMILY, CDD, Pfam	PTHR23029, G3DSA:3.40.50.1240, PTHR23029:SF90, SSF53254, cd07067, PF00300	HP_PGM_like, Histidine phosphatase superfamily (branch 1)	IPR029033, IPR029033, IPR013078, IPR013078	Histidine phosphatase superfamily, Histidine phosphatase superfamily, Histidine phosphatase superfamily, clade-1, Histidine phosphatase superfamily, clade-1
scaffold_44046_1	1448389.BAVQ01000072_gene2532	4.6e-59	233.8												IQ	short-chain dehydrogenase	SUPERFAMILY, Pfam, PANTHER, Gene3D	SSF51735, PF00106, PTHR44147, G3DSA:3.40.50.720	short chain dehydrogenase	IPR036291, IPR002347	NAD(P)-binding domain superfamily, Short-chain dehydrogenase/reductase SDR
scaffold_44081_1	1095772.CAHH01000068_gene403	3.6e-55	221.1												L	Superfamily I DNA and RNA helicases and helicase subunits	NA	NA	NA	NA	NA	na	NA
scaffold_44106_1	1448389.BAVQ01000022_gene1630	1.8e-67	261.9	mccB	2.1.3.15,6.4.1.3,6.4.1.4	ko:K01969,ko:K15052	ko00280,ko00720,ko01100,ko01200,map00280,map00720,map01100,map01200	M00036,M00376	R01859,R04138	RC00097,RC00367,RC00609,RC00942	ko00000,ko00001,ko00002,ko01000			iAF987.Gmet_3290	I	Acetyl-CoA carboxylase, carboxyltransferase component subunits alpha and beta	Pfam, SUPERFAMILY, SUPERFAMILY, ProSiteProfiles, Gene3D, PANTHER	PF01039, SSF52096, SSF52096, PS50980, G3DSA:3.90.226.10, PTHR22855	Carboxyl transferase domain, Acetyl-coenzyme A (CoA) carboxyltransferase N-terminal domain profile.	IPR034733, IPR029045, IPR029045, IPR011762	Acetyl-CoA carboxylase, ClpP/crotonase-like domain superfamily, ClpP/crotonase-like domain superfamily, Acetyl-coenzyme A carboxyltransferase, N-terminal		MetaCyc: PWY-4381, MetaCyc: PWY-5743, MetaCyc: PWY-5744, MetaCyc: PWY-5789, MetaCyc: PWY-6722, Reactome: R-HSA-196780, MetaCyc: PWY-4381, MetaCyc: PWY-5743, MetaCyc: PWY-5744, MetaCyc: PWY-5789, MetaCyc: PWY-6722, Reactome: R-HSA-196780,
scaffold_44162_1	1448389.BAVQ01000043_gene1908	2.7e-49	201.4	nrp											GM	NAD(P)H-binding	SUPERFAMILY, Gene3D, Pfam	SSF51735, G3DSA:3.40.50.720, PF13460	NAD(P)H-binding	IPR036291, IPR016040	NAD(P)-binding domain superfamily, NAD(P)-binding domain
scaffold_44200_1	1448389.BAVQ01000005_gene3133	2.7e-63	248.1	tgs3	2.3.1.20	ko:K00635	ko00561,ko01100,map00561,map01100	M00089	R02251	RC00004,RC00041	ko00000,ko00001,ko00002,ko01000				Q	Belongs to the long-chain O-acyltransferase family	Pfam, MobiDBLite	PF03007, mobidb-lite	Wax ester synthase-like Acyl-CoA acyltransferase domain, consensus disorder prediction	IPR004255	O-acyltransferase, WSD1, N-terminal	GO:0000302, GO:0001666, GO:0003674, GO:0003824, GO:0004144, GO:0005575, GO:0005618, GO:0005623, GO:0005886, GO:0006629, GO:0006638, GO:0006639, GO:0006641, GO:0006950, GO:0006979, GO:0008150, GO:0008152, GO:0008374, GO:0008610, GO:0009058, GO:0009628, GO:0009987, GO:0010035, GO:0016020, GO:0016411, GO:0016740, GO:0016746, GO:0016747, GO:0019432, GO:0030312, GO:0036293, GO:0040007, GO:0042221, GO:…	KEGG: 00073+2.3.1.20, KEGG: 00561+2.3.1.20,
scaffold_44220_1	1448389.BAVQ01000036_gene825	9.4e-80	302.8	ykuE		ko:K07098					ko00000				S	metallophosphoesterase	PANTHER, SUPERFAMILY, PANTHER	PTHR31302:SF20, SSF56300, PTHR31302
scaffold_44266_1	1448389.BAVQ01000003_gene3596	3e-62	244.6	amiA2	3.5.1.4	ko:K01426	ko00330,ko00360,ko00380,ko00627,ko00643,ko01120,map00330,map00360,map00380,map00627,map00643,map01120		R02540,R03096,R03180,R03909,R05551,R05590	RC00010,RC00100,RC00950,RC01025	ko00000,ko00001,ko01000			iNJ661.Rv2363	J	Belongs to the amidase family	PANTHER, PANTHER, Pfam, SUPERFAMILY, MobiDBLite, Gene3D	PTHR11895, PTHR11895:SF35, PF01425, SSF75304, mobidb-lite, G3DSA:3.90.1300.10	Amidase, consensus disorder prediction	IPR000120, IPR023631, IPR036928, IPR036928	Amidase, Amidase signature domain, Amidase signature (AS) superfamily, Amidase signature (AS) superfamily	GO:0004040	KEGG: 00970+6.3.5.7, KEGG: 00970+6.3.5.7, KEGG: 00970+6.3.5.7, KEGG: 00970+6.3.5.7
scaffold_44270_1	1448389.BAVQ01000043_gene1796	3.9e-62	244.2	serB	3.1.3.3	ko:K01079	ko00260,ko00680,ko01100,ko01120,ko01130,ko01200,ko01230,map00260,map00680,map01100,map01120,map01130,map01200,map01230	M00020	R00582	RC00017	ko00000,ko00001,ko00002,ko01000,ko01009			iNJ661.Rv3042c	E	Phosphoserine phosphatase	Gene3D	G3DSA:3.30.70.260				GO:0003674, GO:0003824, GO:0004647, GO:0004721, GO:0004722, GO:0005488, GO:0006464, GO:0006470, GO:0006793, GO:0006796, GO:0006807, GO:0008150, GO:0008152, GO:0009987, GO:0016311, GO:0016597, GO:0016787, GO:0016788, GO:0016791, GO:0019538, GO:0031406, GO:0036094, GO:0036211, GO:0040007, GO:0042578, GO:0043167, GO:0043168, GO:0043170, GO:0043177, GO:0043412, GO:0044237, GO:0044238, GO:0044260, GO:…
scaffold_44294_1	1095772.CAHH01000052_gene246	1.6e-23	115.9														NA	NA	NA	NA	NA	na	NA
scaffold_44299_1	446471.Xcel_0522	1.2e-39	169.5	yacH											D	Phage tail tape measure protein, TP901 family	NA	NA	NA	NA	NA	na	NA
scaffold_44304_1	1095772.CAHH01000073_gene577	2.2e-48	198.4	sigH		ko:K03088					ko00000,ko03021				K	belongs to the sigma-70 factor family, ECF subfamily	Gene3D, PANTHER, SUPERFAMILY, PANTHER, CDD, Pfam	G3DSA:1.10.10.10, PTHR43133, SSF88659, PTHR43133:SF4, cd06171, PF08281	Sigma70_r4, Sigma-70, region 4	IPR036388, IPR039425, IPR013324, IPR013249	Winged helix-like DNA-binding domain superfamily, RNA polymerase sigma-70 like, RNA polymerase sigma factor, region 3/4-like, RNA polymerase sigma factor 70, region 4 type 2	GO:0005575, GO:0005618, GO:0005623, GO:0006355, GO:0006950, GO:0006979, GO:0008150, GO:0009266, GO:0009408, GO:0009628, GO:0009889, GO:0009987, GO:0010468, GO:0010556, GO:0019219, GO:0019222, GO:0030312, GO:0031323, GO:0031326, GO:0033554, GO:0034605, GO:0044464, GO:0050789, GO:0050794, GO:0050896, GO:0051171, GO:0051252, GO:0051409, GO:0051716, GO:0060255, GO:0065007, GO:0071944, GO:0080090, GO:…
scaffold_44416_1	926564.KI911577_gene452	2.5e-42	178.3		2.7.7.7	ko:K02335	ko00230,ko00240,ko01100,ko03030,ko03410,ko03420,ko03440,map00230,map00240,map01100,map03030,map03410,map03420,map03440		R00375,R00376,R00377,R00378	RC02795	ko00000,ko00001,ko01000,ko03032,ko03400				L	COG0749 DNA polymerase I - 3-5 exonuclease and polymerase domains	Pfam, Gene3D, Gene3D, SUPERFAMILY, PANTHER	PF00476, G3DSA:3.30.70.370, G3DSA:1.10.150.20, SSF56672, PTHR10133	DNA polymerase family A	IPR001098, IPR002298	DNA-directed DNA polymerase, family A, palm domain, DNA polymerase A	GO:0003677, GO:0003887, GO:0006260, GO:0003887, GO:0006261
scaffold_44456_1	1077144.AGFF01000005_gene2236	2.2e-64	251.5		3.1.1.3	ko:K01046	ko00561,ko01100,map00561,map01100	M00098	R02250,R02687	RC00020,RC00037,RC00041,RC00094	ko00000,ko00001,ko00002,ko01000				I	secretory lipase	Gene3D, Pfam, PANTHER	G3DSA:3.40.50.1820, PF03583, PTHR34853	Secretory lipase	IPR029058, IPR005152, IPR005152	Alpha/Beta hydrolase fold, Lipase, secreted, Lipase, secreted	GO:0004806, GO:0016042, GO:0004806, GO:0016042
scaffold_44472_1	1448389.BAVQ01000037_gene2049	2.9e-65	254.6		4.6.1.1	ko:K01768	ko00230,ko02025,ko04113,ko04213,map00230,map02025,map04113,map04213	M00695	R00089,R00434	RC00295	ko00000,ko00001,ko00002,ko01000				T	Adenylyl cyclase class-3 4 guanylyl cyclase	SUPERFAMILY, MobiDBLite, MobiDBLite, MobiDBLite, Gene3D, ProSiteProfiles, PANTHER, CDD, Pfam, PANTHER	SSF55073, mobidb-lite, mobidb-lite, mobidb-lite, G3DSA:3.30.70.1230, PS50125, PTHR43081, cd07302, PF00211, PTHR43081:SF14	consensus disorder prediction, consensus disorder prediction, consensus disorder prediction, Guanylate cyclase domain profile, CHD, Adenylate and Guanylate cyclase catalytic domain	IPR029787, IPR029787, IPR001054, IPR001054	Nucleotide cyclase, Nucleotide cyclase, Adenylyl cyclase class-3/4/guanylyl cyclase, Adenylyl cyclase class-3/4/guanylyl cyclase	GO:0009190, GO:0016849, GO:0035556, GO:0009190, GO:0016849, GO:0035556
scaffold_44514_1	1448389.BAVQ01000070_gene2365	3.2e-72	277.7	groL		ko:K04077	ko03018,ko04212,ko04940,ko05134,ko05152,map03018,map04212,map04940,map05134,map05152				ko00000,ko00001,ko03019,ko03029,ko03110,ko04147				O	Prevents misfolding and promotes the refolding and proper assembly of unfolded polypeptides generated under stress conditions	SUPERFAMILY, PANTHER, Pfam, Gene3D, Gene3D	SSF48592, PTHR45633, PF00118, G3DSA:1.10.560.10, G3DSA:3.50.7.10	TCP-1/cpn60 chaperonin family	IPR027413, IPR002423, IPR027413, IPR027409	GroEL-like equatorial domain superfamily, Chaperonin Cpn60/TCP-1 family, GroEL-like equatorial domain superfamily, GroEL-like apical domain superfamily	GO:0001666, GO:0003674, GO:0005488, GO:0005515, GO:0005575, GO:0005576, GO:0005618, GO:0005622, GO:0005623, GO:0005737, GO:0005829, GO:0005886, GO:0006457, GO:0006458, GO:0006950, GO:0008150, GO:0009266, GO:0009408, GO:0009628, GO:0009987, GO:0016020, GO:0016465, GO:0022610, GO:0030112, GO:0030312, GO:0030313, GO:0031975, GO:0032991, GO:0036293, GO:0040007, GO:0042026, GO:0042603, GO:0043388, GO:…
scaffold_44581_1	1448389.BAVQ01000070_gene2375	2.1e-76	291.6	lpd	1.8.1.4	ko:K00382	ko00010,ko00020,ko00260,ko00280,ko00620,ko00630,ko00640,ko01100,ko01110,ko01120,ko01130,ko01200,map00010,map00020,map00260,map00280,map00620,map00630,map00640,map01100,map01110,map01120,map01130,map01200	M00009,M00011,M00036,M00307,M00532	R00209,R01221,R01698,R03815,R07618,R08549	RC00004,RC00022,RC00583,RC02742,RC02833,RC02834	br01601,ko00000,ko00001,ko00002,ko01000,ko04147				C	Dehydrogenase	PANTHER, Pfam, PRINTS, PRINTS, PRINTS, PANTHER, PRINTS, PRINTS, ProSitePatterns, Gene3D, SUPERFAMILY	PTHR22912, PF07992, PR00411, PR00411, PR00411, PTHR22912:SF199, PR00368, PR00368, PS00076, G3DSA:3.50.50.60, SSF51905	Pyridine nucleotide-disulphide oxidoreductase, Pyridine nucleotide disulphide reductase class-I signature, Pyridine nucleotide disulphide reductase class-I signature, Pyridine nucleotide disulphide reductase class-I signature, FAD-dependent pyridine nucleotide reductase signature, FAD-dependent pyridine nucleotide reductase signature, Pyridine nucleotide-disulphide oxidoreductases class-I active …	IPR023753, IPR012999, IPR036188, IPR036188	FAD/NAD(P)-binding domain, Pyridine nucleotide-disulphide oxidoreductase, class I, active site, FAD/NAD(P)-binding domain superfamily, FAD/NAD(P)-binding domain superfamily	GO:0000166, GO:0003674, GO:0003824, GO:0004148, GO:0005488, GO:0005515, GO:0005575, GO:0005576, GO:0005622, GO:0005623, GO:0005737, GO:0005829, GO:0005886, GO:0008150, GO:0008152, GO:0009987, GO:0015036, GO:0016020, GO:0016491, GO:0016651, GO:0016655, GO:0016667, GO:0016668, GO:0019725, GO:0019899, GO:0032991, GO:0035375, GO:0036094, GO:0040007, GO:0042592, GO:0043167, GO:0043168, GO:0044424, GO:…
scaffold_44627_1	1077144.AGFF01000012_gene2536	3.7e-23	113.6												S	Polyketide cyclase / dehydrase and lipid transport	NA	NA	NA	NA	NA	na	NA
scaffold_44627_2	1077144.AGFF01000012_gene2535	3.8e-34	150.2		1.13.12.16	ko:K00459	ko00910,map00910		R00025	RC02541,RC02759	ko00000,ko00001,ko01000				J	2-nitropropane dioxygenase	Gene3D	G3DSA:3.20.20.70		IPR013785	Aldolase-type TIM barrel	GO:0003674, GO:0003824, GO:0008150, GO:0008152, GO:0016491, GO:0055114GO:0003824
scaffold_44679_1	1123065.ATWL01000006_gene2201	1.6e-49	202.2												EGP	Major facilitator Superfamily	TMHMM, PANTHER, CDD, SUPERFAMILY, TMHMM, Gene3D, TMHMM	TMhelix, PTHR42910, cd17324, SSF103473, TMhelix, G3DSA:1.20.1250.20, TMhelix	Region of a membrane-bound protein predicted to be embedded in the membrane, MFS_NepI_like, Region of a membrane-bound protein predicted to be embedded in the membrane, Region of a membrane-bound protein predicted to be embedded in the membrane.	IPR036259	MFS transporter superfamily
scaffold_44699_1	1095772.CAHH01000068_gene399	9e-43	179.9												S	5-oxoprolinase (ATP-hydrolyzing) activity	TMHMM	TMhelix	Region of a membrane-bound protein predicted to be embedded in the membrane.
scaffold_44741_1	1193181.BN10_1300016	5.2e-23	113.2														NA	NA	NA	NA	NA	na	NA
scaffold_44777_1	411466.ACTODO_00002	4.6e-19	99.8														NA	NA	NA	NA	NA	na	NA
scaffold_44793_1	1448389.BAVQ01000023_gene1384	1.2e-51	209.1	icaR											K	transcriptional regulator	ProSitePatterns, PRINTS, PRINTS, PANTHER, PANTHER, SUPERFAMILY, Pfam, Gene3D, ProSiteProfiles	PS01081, PR00455, PR00455, PTHR30055:SF150, PTHR30055, SSF46689, PF00440, G3DSA:1.10.357.10, PS50977	TetR-type HTH domain signature, TetR bacterial regulatory protein HTH signature, TetR bacterial regulatory protein HTH signature, Bacterial regulatory proteins, tetR family, TetR-type HTH domain profile.	IPR023772, IPR001647, IPR001647, IPR009057, IPR001647, IPR001647	DNA-binding HTH domain, TetR-type, conserved site, DNA-binding HTH domain, TetR-type, DNA-binding HTH domain, TetR-type, Homeobox-like domain superfamily, DNA-binding HTH domain, TetR-type, DNA-binding HTH domain, TetR-type	GO:0003677, GO:0003677, GO:0003677, GO:0003677, GO:0003677
scaffold_44877_1	1448389.BAVQ01000027_gene1084	6.6e-54	216.9	lhr		ko:K03724					ko00000,ko01000,ko03400				L	dead DEAH box helicase	CDD, Gene3D, Pfam, ProSiteProfiles, PANTHER, PANTHER, SUPERFAMILY	cd17922, G3DSA:3.40.50.300, PF00270, PS51192, PTHR24031:SF348, PTHR24031, SSF52540	DEXHc_LHR-like, DEAD/DEAH box helicase, Superfamilies 1 and 2 helicase ATP-binding type-1 domain profile.	IPR011545, IPR014001, IPR027417	DEAD/DEAH box helicase domain, Helicase superfamily 1/2, ATP-binding domain, P-loop containing nucleoside triphosphate hydrolase	GO:0003674, GO:0003724, GO:0003824, GO:0004004, GO:0004386, GO:0005575, GO:0005622, GO:0005623, GO:0005737, GO:0006139, GO:0006725, GO:0006807, GO:0008026, GO:0008150, GO:0008152, GO:0008186, GO:0009987, GO:0010501, GO:0016070, GO:0016462, GO:0016787, GO:0016817, GO:0016818, GO:0016887, GO:0017111, GO:0034641, GO:0042623, GO:0043170, GO:0044237, GO:0044238, GO:0044424, GO:0044464, GO:0046483, GO:…
scaffold_44903_1	1448389.BAVQ01000036_gene861	1.5e-74	285.4	yprA		ko:K06877					ko00000				L	dead DEAH box helicase	NA	NA	NA	NA	NA	GO:0003674, GO:0003724, GO:0003824, GO:0004004, GO:0004386, GO:0005575, GO:0005622, GO:0005623, GO:0005737, GO:0006139, GO:0006725, GO:0006807, GO:0008026, GO:0008150, GO:0008152, GO:0008186, GO:0009987, GO:0010501, GO:0016070, GO:0016462, GO:0016787, GO:0016817, GO:0016818, GO:0016887, GO:0017111, GO:0034641, GO:0042623, GO:0043170, GO:0044237, GO:0044238, GO:0044424, GO:0044464, GO:0046483, GO:…	NA
scaffold_45024_1	1448389.BAVQ01000027_gene1111	2.3e-70	271.6	gabT	2.6.1.19,2.6.1.22	ko:K00823,ko:K07250	ko00250,ko00280,ko00410,ko00640,ko00650,ko01100,ko01120,map00250,map00280,map00410,map00640,map00650,map01100,map01120	M00027	R00908,R01648,R04188	RC00006,RC00062,RC00160	ko00000,ko00001,ko00002,ko01000,ko01007				E	Belongs to the class-III pyridoxal-phosphate-dependent aminotransferase family	PANTHER, SUPERFAMILY, Gene3D, PANTHER, Pfam	PTHR43206:SF2, SSF53383, G3DSA:3.40.640.10, PTHR43206, PF00202	Aminotransferase class-III	IPR015424, IPR015421, IPR005814	Pyridoxal phosphate-dependent transferase, Pyridoxal phosphate-dependent transferase, major domain, Aminotransferase class-III	GO:0003824, GO:0008483, GO:0030170
scaffold_45065_1	1448389.BAVQ01000036_gene890	5.6e-61	240.4		3.5.1.4	ko:K01426	ko00330,ko00360,ko00380,ko00627,ko00643,ko01120,map00330,map00360,map00380,map00627,map00643,map01120		R02540,R03096,R03180,R03909,R05551,R05590	RC00010,RC00100,RC00950,RC01025	ko00000,ko00001,ko01000				J	Belongs to the amidase family	Gene3D, Pfam, SUPERFAMILY	G3DSA:3.90.1300.10, PF01425, SSF75304	Amidase	IPR036928, IPR023631, IPR036928	Amidase signature (AS) superfamily, Amidase signature domain, Amidase signature (AS) superfamily		KEGG: 00970+6.3.5.7, KEGG: 00970+6.3.5.7, KEGG: 00970+6.3.5.7
scaffold_45092_2	356829.BITS_0171	4.6e-12	76.6												K	transcriptional regulator	Pfam, PANTHER, ProSiteProfiles, SUPERFAMILY, Gene3D	PF00440, PTHR43479, PS50977, SSF46689, G3DSA:1.10.357.10	Bacterial regulatory proteins, tetR family, TetR-type HTH domain profile.	IPR001647, IPR001647, IPR009057	DNA-binding HTH domain, TetR-type, DNA-binding HTH domain, TetR-type, Homeobox-like domain superfamily	GO:0003677, GO:0003677, GO:0003677
scaffold_45095_1	1448389.BAVQ01000023_gene1548	1.4e-59	235.7	uspA1											T	Belongs to the universal stress protein A family	Pfam, PANTHER, SUPERFAMILY, Gene3D, PRINTS, PRINTS, CDD, PANTHER	PF00582, PTHR46268, SSF52402, G3DSA:3.40.50.12370, PR01438, PR01438, cd00293, PTHR46268:SF9	Universal stress protein family, Universal stress protein signature, Universal stress protein signature, USP_Like	IPR006016, IPR006015, IPR006015, IPR006015	UspA, Universal stress protein A family, Universal stress protein A family, Universal stress protein A family
scaffold_45127_1	478801.Ksed_00530	7.7e-17	93.2		2.3.1.94	ko:K10817,ko:K12443,ko:K15672	ko00522,ko01051,ko01052,ko01130,map00522,map01051,map01052,map01130	M00774	R00918	RC00004,RC02825,RC02826,RC02828,RC02829,RC02830,RC02831	ko00000,ko00001,ko00002,ko01000,ko01004,ko01008				GM	ADP-glyceromanno-heptose 6-epimerase activity	Coils	Coil
scaffold_45172_2	714083.JH370377_gene1317	3.8e-08	63.9														NA	NA	NA	NA	NA	na	NA
scaffold_45262_1	1448389.BAVQ01000016_gene4110	3.2e-56	224.6	modA		ko:K02020	ko02010,map02010	M00189			ko00000,ko00001,ko00002,ko02000	3.A.1.8			P	ABC transporter, periplasmic molybdate-binding protein	SUPERFAMILY, PANTHER, Gene3D, Pfam, TIGRFAM, PANTHER, Gene3D	SSF53850, PTHR30632, G3DSA:3.40.190.10, PF13531, TIGR01256, PTHR30632:SF0, G3DSA:3.40.190.10	Bacterial extracellular solute-binding protein, modA: molybdate ABC transporter, periplasmic molybdate-binding protein	IPR005950	Molybdate ABC transporter, substrate-binding protein	GO:0003674, GO:0005488, GO:0005575, GO:0005623, GO:0008150, GO:0030288, GO:0030313, GO:0030973, GO:0031975, GO:0040007, GO:0042597, GO:0043167, GO:0043168, GO:0044110, GO:0044116, GO:0044117, GO:0044119, GO:0044403, GO:0044419, GO:0044464, GO:0051704GO:0015689
scaffold_45299_1	1448389.BAVQ01000023_gene1457	2.4e-80	304.7	ybdK_1											S	glutamate--cysteine ligase	Pfam, Gene3D, SUPERFAMILY	PF04107, G3DSA:3.30.590.20, SSF55931	Glutamate-cysteine ligase family 2(GCS2)	IPR006336, IPR014746	Glutamate--cysteine ligase, GCS2, Glutamine synthetase/guanido kinase, catalytic domain	GO:0004357, GO:0042398, GO:0003824	KEGG: 00270+6.3.2.2, KEGG: 00480+6.3.2.2, MetaCyc: PWY-6840, MetaCyc: PWY-7255, MetaCyc: PWY-8043,
scaffold_45318_1	1448389.BAVQ01000003_gene3425	1.6e-71	275.4	bioA	2.6.1.62	ko:K00833	ko00780,ko01100,map00780,map01100	M00123,M00573,M00577	R03231	RC00006,RC00887	ko00000,ko00001,ko00002,ko01000,ko01007			iIT341.HP0976,iUTI89_1310.UTI89_C0772,iZ_1308.Z0993	H	Catalyzes the transfer of the alpha-amino group from S- adenosyl-L-methionine (SAM) to 7-keto-8-aminopelargonic acid (KAPA) to form 7,8-diaminopelargonic acid (DAPA). It is the only animotransferase known to utilize SAM as an amino donor	PANTHER, Gene3D, PANTHER, Pfam, SUPERFAMILY, ProSitePatterns	PTHR42684:SF3, G3DSA:3.40.640.10, PTHR42684, PF00202, SSF53383, PS00600	Aminotransferase class-III, Aminotransferases class-III pyridoxal-phosphate attachment site.	IPR015421, IPR005814, IPR015424, IPR005814	Pyridoxal phosphate-dependent transferase, major domain, Aminotransferase class-III, Pyridoxal phosphate-dependent transferase, Aminotransferase class-III	GO:0003674, GO:0003824, GO:0004015, GO:0005488, GO:0006082, GO:0006732, GO:0006766, GO:0006767, GO:0006768, GO:0006790, GO:0006807, GO:0008144, GO:0008150, GO:0008152, GO:0008483, GO:0009058, GO:0009102, GO:0009108, GO:0009110, GO:0009987, GO:0016053, GO:0016740, GO:0016769, GO:0017144, GO:0018130, GO:0019752, GO:0019842, GO:0030170, GO:0032787, GO:0034641, GO:0036094, GO:0042364, GO:0043167, GO:…
scaffold_45388_1	1095772.CAHH01000009_gene2090	3.5e-22	110.9	ccsA											O	cytochrome C	Coils, TMHMM, TMHMM	Coil, TMhelix, TMhelix	Region of a membrane-bound protein predicted to be embedded in the membrane, Region of a membrane-bound protein predicted to be embedded in the membrane.			GO:0005575, GO:0005623, GO:0005886, GO:0006810, GO:0008150, GO:0008152, GO:0015886, GO:0016020, GO:0044464, GO:0051179, GO:0051181, GO:0051234, GO:0055114, GO:0071702, GO:0071705, GO:0071944, GO:1901678
scaffold_45429_1	1448389.BAVQ01000013_gene3973	4.9e-57	227.3	hbhA		ko:K16645					ko00000,ko00536				S	Heparin-binding hemagglutinin	Coils	Coil				GO:0003674, GO:0005488, GO:0005515, GO:0005539, GO:0005575, GO:0005618, GO:0005622, GO:0005623, GO:0005737, GO:0005829, GO:0005886, GO:0007155, GO:0007157, GO:0008150, GO:0008201, GO:0009986, GO:0016020, GO:0022610, GO:0030100, GO:0030312, GO:0032879, GO:0035821, GO:0042802, GO:0043167, GO:0043168, GO:0044003, GO:0044068, GO:0044077, GO:0044078, GO:0044403, GO:0044419, GO:0044424, GO:0044444, GO:…
scaffold_45438_1	1448389.BAVQ01000004_gene3697	1.1e-45	189.5	gabD	1.2.1.16,1.2.1.20,1.2.1.79	ko:K00135	ko00250,ko00310,ko00350,ko00650,ko00760,ko01100,ko01120,map00250,map00310,map00350,map00650,map00760,map01100,map01120	M00027	R00713,R00714,R02401	RC00080	ko00000,ko00001,ko00002,ko01000				C	Belongs to the aldehyde dehydrogenase family	Pfam, SUPERFAMILY, Coils, PANTHER, Gene3D	PF00171, SSF53720, Coil, PTHR43217, G3DSA:3.40.605.10	Aldehyde dehydrogenase family	IPR015590, IPR016161, IPR016162	Aldehyde dehydrogenase domain, Aldehyde/histidinol dehydrogenase, Aldehyde dehydrogenase, N-terminal	GO:0016491, GO:0055114, GO:0016491, GO:0055114, GO:0016491, GO:0055114
scaffold_45515_1	1122130.AUHN01000006_gene1999	2.6e-42	178.3	dhaL	2.7.1.121	ko:K05879	ko00561,ko01100,map00561,map01100		R01012	RC00015,RC00017	ko00000,ko00001,ko01000			iECUMN_1333.ECUMN_1495	S	Dihydroxyacetone kinase	SUPERFAMILY, Gene3D, ProSiteProfiles, PANTHER, SMART, Pfam, PANTHER, TIGRFAM	SSF101473, G3DSA:1.25.40.340, PS51480, PTHR28629, SM01120, PF02734, PTHR28629:SF4, TIGR02365	DhaL domain profile, DAK2 domain, dha_L_ycgS: dihydroxyacetone kinase, L subunit	IPR036117, IPR036117, IPR004007, IPR004007, IPR004007, IPR012737	DhaL domain superfamily, DhaL domain superfamily, DhaL domain, DhaL domain, DhaL domain, Dihydroxyacetone kinase, subunit L	GO:0000166, GO:0000287, GO:0003674, GO:0003824, GO:0005488, GO:0005524, GO:0005575, GO:0005622, GO:0005623, GO:0005737, GO:0005829, GO:0006793, GO:0006796, GO:0008144, GO:0008150, GO:0008152, GO:0009987, GO:0016301, GO:0016310, GO:0016740, GO:0016772, GO:0016773, GO:0017076, GO:0030554, GO:0032553, GO:0032555, GO:0032559, GO:0035639, GO:0036094, GO:0043167, GO:0043168, GO:0043169, GO:0043531, GO:…	Reactome: R-HSA-168928, Reactome: R-HSA-70350, Reactome: R-HSA-168928, Reactome: R-HSA-70350, Reactome: R-HSA-168928, Reactome: R-HSA-70350, Reactome: R-HSA-168928, Reactome: R-HSA-70350, Reactome: R-HSA-168928, Reactome: R-HSA-70350, KEGG: 00561+2.7.1.121
scaffold_45528_1	1123322.KB904671_gene2860	6.2e-20	104		3.2.1.51	ko:K01206	ko00511,map00511				ko00000,ko00001,ko01000,ko04147		GH29		G	Alpha-L-fucosidase	Pfam, Gene3D, SUPERFAMILY	PF13385, G3DSA:2.60.120.200, SSF49899	Concanavalin A-like lectin/glucanases superfamily	IPR013320	Concanavalin A-like lectin/glucanase domain superfamily
scaffold_45544_1	1095772.CAHH01000026_gene2479	1.2e-63	249.2												S	Sulfatase-modifying factor enzyme 1	NA	NA	NA	NA	NA	na	NA
scaffold_45622_1	1448389.BAVQ01000022_gene1614	2.3e-54	218.4												IQ	Belongs to the short-chain dehydrogenases reductases (SDR) family	SUPERFAMILY, Gene3D, PANTHER, PANTHER, Pfam, PRINTS, PRINTS	SSF51735, G3DSA:3.40.50.720, PTHR45024:SF1, PTHR45024, PF00106, PR00081, PR00081	short chain dehydrogenase, Glucose/ribitol dehydrogenase family signature, Glucose/ribitol dehydrogenase family signature	IPR036291, IPR002347, IPR002347, IPR002347	NAD(P)-binding domain superfamily, Short-chain dehydrogenase/reductase SDR, Short-chain dehydrogenase/reductase SDR, Short-chain dehydrogenase/reductase SDR
scaffold_45645_1	196162.Noca_1588	2.8e-68	264.6		2.1.1.72,3.1.21.3,3.1.21.4	ko:K01153,ko:K01155,ko:K03427,ko:K09384					ko00000,ko01000,ko02048				L	Type I site-specific restriction-modification system, R (Restriction) subunit and related	SUPERFAMILY, Gene3D	SSF52540, G3DSA:3.40.50.300		IPR027417	P-loop containing nucleoside triphosphate hydrolase
scaffold_45702_1	1448389.BAVQ01000071_gene2520	1.4e-67	262.3												E	Alanine racemase	PANTHER, PANTHER, Gene3D, SUPERFAMILY, Pfam	PTHR28004, PTHR28004:SF7, G3DSA:3.20.20.10, SSF51419, PF01168	Alanine racemase, N-terminal domain	IPR029066, IPR029066, IPR001608	PLP-binding barrel, PLP-binding barrel, Alanine racemase, N-terminal		KEGG: 00473+5.1.1.1, MetaCyc: PWY-7383, MetaCyc: PWY-8040
scaffold_45723_1	1448389.BAVQ01000036_gene846	3.7e-65	254.2												S	Belongs to the short-chain dehydrogenases reductases (SDR) family	Pfam, PRINTS, PRINTS, PRINTS, PRINTS, PRINTS, PRINTS, PRINTS, PANTHER, PANTHER, CDD, Gene3D, SUPERFAMILY	PF00106, PR00080, PR00080, PR00080, PR00081, PR00081, PR00081, PR00081, PTHR44196:SF1, PTHR44196, cd05233, G3DSA:3.40.50.720, SSF51735	short chain dehydrogenase, Short-chain dehydrogenase/reductase (SDR) superfamily signature, Short-chain dehydrogenase/reductase (SDR) superfamily signature, Short-chain dehydrogenase/reductase (SDR) superfamily signature, Glucose/ribitol dehydrogenase family signature, Glucose/ribitol dehydrogenase family signature, Glucose/ribitol dehydrogenase family signature, Glucose/ribitol dehydrogenase fam…	IPR002347, IPR002347, IPR002347, IPR002347, IPR002347, IPR002347, IPR002347, IPR002347, IPR036291	Short-chain dehydrogenase/reductase SDR, Short-chain dehydrogenase/reductase SDR, Short-chain dehydrogenase/reductase SDR, Short-chain dehydrogenase/reductase SDR, Short-chain dehydrogenase/reductase SDR, Short-chain dehydrogenase/reductase SDR, Short-chain dehydrogenase/reductase SDR, Short-chain dehydrogenase/reductase SDR, NAD(P)-binding domain superfamily
scaffold_45767_1	1448389.BAVQ01000072_gene2651	4.8e-38	163.3	rpsG		ko:K02992	ko03010,map03010	M00178,M00179			br01610,ko00000,ko00001,ko00002,ko03011				J	One of the primary rRNA binding proteins, it binds directly to 16S rRNA where it nucleates assembly of the head domain of the 30S subunit. Is located at the subunit interface close to the decoding center, probably blocks exit of the E-site tRNA	Pfam, Gene3D, SUPERFAMILY, PANTHER, PANTHER	PF00177, G3DSA:1.10.455.10, SSF47973, PTHR11205:SF19, PTHR11205	Ribosomal protein S7p/S5e	IPR023798, IPR036823, IPR036823, IPR000235	Ribosomal protein S7 domain, Ribosomal protein S7 domain superfamily, Ribosomal protein S7 domain superfamily, Ribosomal protein S5/S7	GO:0000028, GO:0003674, GO:0003676, GO:0003723, GO:0003729, GO:0003735, GO:0005198, GO:0005488, GO:0005575, GO:0005618, GO:0005622, GO:0005623, GO:0005737, GO:0005829, GO:0005840, GO:0005886, GO:0006412, GO:0006417, GO:0006518, GO:0006807, GO:0006996, GO:0008150, GO:0008152, GO:0009058, GO:0009059, GO:0009889, GO:0009890, GO:0009892, GO:0009987, GO:0010467, GO:0010468, GO:0010556, GO:0010558, GO:…
scaffold_45772_1	1448389.BAVQ01000018_gene1207	4.7e-68	263.8	hemD	1.3.1.76,2.1.1.107,4.2.1.75,4.99.1.4	ko:K02302,ko:K02303,ko:K13542	ko00860,ko01100,ko01110,ko01120,map00860,map01100,map01110,map01120	M00121	R02864,R03165,R03194,R03947	RC00003,RC00871,RC01012,RC01034,RC01861	ko00000,ko00001,ko00002,ko01000				H	Uroporphyrinogen-III synthase	PANTHER, PANTHER, SUPERFAMILY, Pfam, Gene3D	PTHR45790, PTHR45790:SF3, SSF53790, PF00590, G3DSA:3.40.1010.10	Tetrapyrrole (Corrin/Porphyrin) Methylases	IPR035996, IPR000878, IPR014777	Tetrapyrrole methylase superfamily, Tetrapyrrole methylase, Tetrapyrrole methylase, subdomain 1	GO:0003674, GO:0003824, GO:0004851, GO:0006725, GO:0006778, GO:0006779, GO:0006783, GO:0006807, GO:0008150, GO:0008152, GO:0008168, GO:0008169, GO:0008757, GO:0009058, GO:0009987, GO:0016740, GO:0016741, GO:0018130, GO:0019354, GO:0019438, GO:0032259, GO:0033013, GO:0033014, GO:0034641, GO:0042168, GO:0042440, GO:0044237, GO:0044249, GO:0044271, GO:0046148, GO:0046156, GO:0046483, GO:0051186, GO:…	Reactome: R-HSA-5358493, Reactome: R-HSA-5358493, Reactome: R-HSA-5358493
scaffold_45877_1	1095772.CAHH01000034_gene1332	6.4e-33	147.1			ko:K09817	ko02010,map02010	M00242			ko00000,ko00001,ko00002,ko01000,ko02000	3.A.1.15.3,3.A.1.15.5			P	ABC transporter	Gene3D, Pfam, PANTHER, SUPERFAMILY	G3DSA:3.40.50.300, PF00005, PTHR42734, SSF52540	ABC transporter	IPR003439, IPR027417	ABC transporter-like, P-loop containing nucleoside triphosphate hydrolase	GO:0005524, GO:0016887
scaffold_45885_1	1122622.ATWJ01000011_gene2181	4.3e-37	161												G	PFAM SMP-30 Gluconolaconase	SUPERFAMILY, Gene3D	SSF63829, G3DSA:2.120.10.30		IPR011042	Six-bladed beta-propeller, TolB-like
scaffold_45955_1	479431.Namu_4714	3.9e-22	111.3			ko:K02450,ko:K07782	ko02020,ko02024,ko02026,map02020,map02024,map02026	M00331			ko00000,ko00001,ko00002,ko02044,ko03000	9.B.42			K	regulatory protein LuxR	NA	NA	NA	NA	NA	na	NA
scaffold_45972_1	1448389.BAVQ01000043_gene1776	7.2e-50	203.4	ohrR											K	transcriptional regulator	Gene3D, SUPERFAMILY, SMART, ProSiteProfiles, PANTHER, PANTHER, Pfam	G3DSA:1.10.10.10, SSF46785, SM00347, PS50995, PTHR33164:SF5, PTHR33164, PF01047	MarR-type HTH domain profile, MarR family	IPR036388, IPR036390, IPR000835, IPR000835, IPR000835	Winged helix-like DNA-binding domain superfamily, Winged helix DNA-binding domain superfamily, MarR-type HTH domain, MarR-type HTH domain, MarR-type HTH domain	GO:0003700, GO:0006355, GO:0003700, GO:0006355, GO:0003700, GO:0006355
scaffold_45994_1	1120959.ATXF01000004_gene2824	8.1e-24	115.9												L	Eco57I restriction-modification methylase	SUPERFAMILY, SignalP_GRAM_POSITIVE	SSF56784, SignalP-TM		IPR036412	HAD-like superfamily
scaffold_46033_1	888439.HMPREF9240_01920	3.1e-43	181.4												S	Terminase	NA	NA	NA	NA	NA	na	NA
scaffold_46050_1	1448389.BAVQ01000025_gene1256	2.7e-45	187.6		1.17.1.1	ko:K12452	ko00520,map00520		R03391,R03392	RC00230	ko00000,ko00001,ko01000				E	Belongs to the DegT DnrJ EryC1 family	SUPERFAMILY, Gene3D, Pfam	SSF53383, G3DSA:3.90.1150.10, PF01041	DegT/DnrJ/EryC1/StrS aminotransferase family	IPR015424, IPR015422, IPR000653	Pyridoxal phosphate-dependent transferase, Pyridoxal phosphate-dependent transferase domain 1, DegT/DnrJ/EryC1/StrS aminotransferase	GO:0003824
scaffold_46050_2	1448389.BAVQ01000025_gene1257	1.1e-19	101.7												IQ	Belongs to the short-chain dehydrogenases reductases (SDR) family	SUPERFAMILY, Pfam, Gene3D	SSF51735, PF00106, G3DSA:3.40.50.720	short chain dehydrogenase	IPR036291, IPR002347	NAD(P)-binding domain superfamily, Short-chain dehydrogenase/reductase SDR
scaffold_46094_1	1448389.BAVQ01000080_gene359	4.4e-08	64.3	lppL											S	amine dehydrogenase activity	MobiDBLite, SignalP_GRAM_POSITIVE, MobiDBLite, MobiDBLite	mobidb-lite, SignalP-TM, mobidb-lite, mobidb-lite	consensus disorder prediction, consensus disorder prediction, consensus disorder prediction
scaffold_46122_1	1996.JOFO01000078_gene4182	5.7e-23	114														NA	NA	NA	NA	NA	na	NA
scaffold_46130_1	1305732.JAGG01000001_gene714	4.2e-27	127.5			ko:K06888,ko:K20948	ko05111,map05111				ko00000,ko00001				O	Highly conserved protein containing a thioredoxin domain	SUPERFAMILY	SSF48239		IPR008930	Terpenoid cyclases/protein prenyltransferase alpha-alpha toroid
scaffold_46243_1	1448389.BAVQ01000002_gene2946	2.7e-45	188	cobT	1.13.11.79,2.4.2.21	ko:K00768,ko:K04719	ko00740,ko00860,ko01100,map00740,map00860,map01100	M00122	R04148,R09083	RC00033,RC00063,RC00435,RC02413	ko00000,ko00001,ko00002,ko01000				C	Cob(II)yrinic acid a,c-diamide reductase	PANTHER, PANTHER, Gene3D, SUPERFAMILY, Pfam	PTHR43463:SF2, PTHR43463, G3DSA:3.40.109.10, SSF55469, PF00881	Nitroreductase family	IPR000415, IPR000415, IPR029479	Nitroreductase-like, Nitroreductase-like, Nitroreductase	GO:0016491, GO:0016491	Reactome: R-HSA-209968, Reactome: R-HSA-209968, Reactome: R-HSA-209968
scaffold_46303_1	1448389.BAVQ01000005_gene3133	1.7e-55	221.9	tgs3	2.3.1.20	ko:K00635	ko00561,ko01100,map00561,map01100	M00089	R02251	RC00004,RC00041	ko00000,ko00001,ko00002,ko01000				Q	Belongs to the long-chain O-acyltransferase family	PANTHER, Pfam, PANTHER	PTHR31650:SF1, PF06974, PTHR31650	Protein of unknown function (DUF1298)	IPR009721	O-acyltransferase WSD1, C-terminal	GO:0000302, GO:0001666, GO:0003674, GO:0003824, GO:0004144, GO:0005575, GO:0005618, GO:0005623, GO:0005886, GO:0006629, GO:0006638, GO:0006639, GO:0006641, GO:0006950, GO:0006979, GO:0008150, GO:0008152, GO:0008374, GO:0008610, GO:0009058, GO:0009628, GO:0009987, GO:0010035, GO:0016020, GO:0016411, GO:0016740, GO:0016746, GO:0016747, GO:0019432, GO:0030312, GO:0036293, GO:0040007, GO:0042221, GO:…	KEGG: 00073+2.3.1.20, KEGG: 00561+2.3.1.20,
scaffold_46332_2	446469.Sked_04950	1.4e-20	105.1												S	DsrE/DsrF-like family	Pfam, Gene3D, SUPERFAMILY	PF02635, G3DSA:3.40.1260.10, SSF75169	DsrE/DsrF-like family	IPR003787, IPR027396, IPR027396	Sulphur relay, DsrE/F-like protein, DsrEFH-like, DsrEFH-like
scaffold_46402_1	1448389.BAVQ01000015_gene4142	4.2e-53	214.2												L	helicase	MobiDBLite, MobiDBLite	mobidb-lite, mobidb-lite	consensus disorder prediction, consensus disorder prediction
scaffold_46433_2	1448389.BAVQ01000005_gene3045	2.6e-23	114.4												S	conserved protein, contains double-stranded beta-helix domain	Gene3D, PANTHER, SUPERFAMILY	G3DSA:2.60.120.10, PTHR37694, SSF51182		IPR014710, IPR011051	RmlC-like jelly roll fold, RmlC-like cupin domain superfamily
scaffold_46450_1	1448389.BAVQ01000003_gene3674	4.9e-78	297	yjjK											S	ABC transporter	Pfam, Gene3D, Pfam, PANTHER, CDD, SUPERFAMILY	PF12848, G3DSA:3.40.50.300, PF00005, PTHR43858, cd03221, SSF52540	ABC transporter, ABC transporter, ABCF_EF-3	IPR032781, IPR003439, IPR022374, IPR027417	ABC-transporter extension domain, ABC transporter-like, Energy-dependent translational throttle protein EttA, P-loop containing nucleoside triphosphate hydrolase	GO:0005575, GO:0005618, GO:0005622, GO:0005623, GO:0005737, GO:0005829, GO:0005886, GO:0008150, GO:0016020, GO:0030312, GO:0040007, GO:0044424, GO:0044444, GO:0044464, GO:0071944GO:0005524, GO:0016887, GO:0045900
scaffold_46459_1	1448389.BAVQ01000030_gene684	3.2e-61	241.1												EGP	Major facilitator superfamily	TMHMM, Pfam, PANTHER, TMHMM, PANTHER, CDD, Gene3D, ProSiteProfiles, TMHMM, TMHMM, SUPERFAMILY, TMHMM, ProSitePatterns	TMhelix, PF07690, PTHR42718, TMhelix, PTHR42718:SF29, cd17321, G3DSA:1.20.1720.10, PS50850, TMhelix, TMhelix, SSF103473, TMhelix, PS00216	Region of a membrane-bound protein predicted to be embedded in the membrane, Major Facilitator Superfamily, Region of a membrane-bound protein predicted to be embedded in the membrane, MFS_MMR_MDR_like, Major facilitator superfamily (MFS) profile, Region of a membrane-bound protein predicted to be embedded in the membrane, Region of a membrane-bound protein predicted to be embedded in the membran…	IPR011701, IPR020846, IPR036259, IPR005829	Major facilitator superfamily, Major facilitator superfamily domain, MFS transporter superfamily, Sugar transporter, conserved site	GO:0055085, GO:0016021, GO:0022857, GO:0055085
scaffold_46465_1	1448389.BAVQ01000038_gene1962	3.8e-62	244.2												D	Putative exonuclease SbcCD, C subunit	NA	NA	NA	NA	NA	na	NA
scaffold_46472_1	1448389.BAVQ01000003_gene3646	7.7e-09	65.5	rne	3.1.26.12	ko:K08300,ko:K08301	ko03018,map03018	M00394			ko00000,ko00001,ko00002,ko01000,ko03009,ko03019				J	ribonuclease Rne Rng family	Pfam	PF04760	Translation initiation factor IF-2, N-terminal region	IPR006847	Translation initiation factor IF-2, N-terminal	GO:0006139, GO:0006364, GO:0006396, GO:0006397, GO:0006725, GO:0006807, GO:0008150, GO:0008152, GO:0009987, GO:0010467, GO:0016070, GO:0016071, GO:0016072, GO:0022613, GO:0034470, GO:0034641, GO:0034660, GO:0042254, GO:0043170, GO:0044085, GO:0044237, GO:0044238, GO:0046483, GO:0071704, GO:0071840, GO:0090304, GO:1901360
scaffold_46486_1	548479.HMPREF0573_10611	6.2e-20	104												M	regulator of chromosome condensation, RCC1	Pfam	PF04122	Putative cell wall binding repeat 2	IPR007253	Putative cell wall binding repeat 2
scaffold_46542_1	1448389.BAVQ01000070_gene2183	1.3e-18	98.6			ko:K06994					ko00000				T	PFAM MMPL domain protein	MobiDBLite, Pfam, TMHMM, MobiDBLite	mobidb-lite, PF03176, TMhelix, mobidb-lite	consensus disorder prediction, MMPL family, Region of a membrane-bound protein predicted to be embedded in the membrane, consensus disorder prediction	IPR004869	Membrane transport protein MMPL domain	GO:0016020
scaffold_46550_1	1077144.AGFF01000003_gene2390	3.9e-51	207.6	murJ		ko:K03980					ko00000,ko01011,ko02000	2.A.66.4			KLT	Integral membrane protein MviN	TMHMM, MobiDBLite, MobiDBLite	TMhelix, mobidb-lite, mobidb-lite	Region of a membrane-bound protein predicted to be embedded in the membrane, consensus disorder prediction, consensus disorder prediction
scaffold_46569_1	1448389.BAVQ01000023_gene1569	5.1e-75	287	serC	2.6.1.52	ko:K00831	ko00260,ko00680,ko00750,ko01100,ko01120,ko01130,ko01200,ko01230,map00260,map00680,map00750,map01100,map01120,map01130,map01200,map01230	M00020,M00124	R04173,R05085	RC00006,RC00036	ko00000,ko00001,ko00002,ko01000,ko01007				E	Catalyzes the reversible conversion of 3- phosphohydroxypyruvate to phosphoserine and of 3-hydroxy-2-oxo-4- phosphonooxybutanoate to phosphohydroxythreonine	PANTHER, Pfam, Gene3D, PANTHER, SUPERFAMILY	PTHR21152, PF00266, G3DSA:3.40.640.10, PTHR21152:SF24, SSF53383	Aminotransferase class-V	IPR000192, IPR015421, IPR015424	Aminotransferase class V domain, Pyridoxal phosphate-dependent transferase, major domain, Pyridoxal phosphate-dependent transferase	GO:0001505, GO:0003674, GO:0003824, GO:0004760, GO:0005575, GO:0005576, GO:0005622, GO:0005623, GO:0005737, GO:0005777, GO:0005886, GO:0006082, GO:0006520, GO:0006544, GO:0006545, GO:0006807, GO:0008150, GO:0008152, GO:0008453, GO:0008483, GO:0008652, GO:0009058, GO:0009069, GO:0009070, GO:0009987, GO:0016020, GO:0016053, GO:0016740, GO:0016769, GO:0017144, GO:0019265, GO:0019752, GO:0040007, GO:…
scaffold_46581_1	1448389.BAVQ01000023_gene1383	9.4e-61	239.6	mfd		ko:K03723	ko03420,map03420				ko00000,ko00001,ko01000,ko03400				L	Couples transcription and DNA repair by recognizing RNA polymerase (RNAP) stalled at DNA lesions. Mediates ATP-dependent release of RNAP and its truncated transcript from the DNA, and recruitment of nucleotide excision repair machinery to the damaged site	SUPERFAMILY, Gene3D	SSF52540, G3DSA:3.40.50.11180		IPR027417	P-loop containing nucleoside triphosphate hydrolase	GO:0005575, GO:0005622, GO:0005623, GO:0005737, GO:0005829, GO:0005886, GO:0016020, GO:0044424, GO:0044444, GO:0044464, GO:0071944
scaffold_46584_1	1448389.BAVQ01000022_gene1652	1e-51	209.5	iaaM	1.13.12.3	ko:K00466	ko00380,map00380		R00679	RC00213	ko00000,ko00001,ko01000			iJN746.PP_0383	E	amine oxidase	Pfam, PANTHER, PANTHER, Gene3D, Gene3D, SUPERFAMILY	PF01593, PTHR42923, PTHR42923:SF10, G3DSA:3.50.50.60, G3DSA:1.10.405.40, SSF51905	Flavin containing amine oxidoreductase	IPR002937, IPR036188, IPR036188	Amine oxidase, FAD/NAD(P)-binding domain superfamily, FAD/NAD(P)-binding domain superfamily	GO:0016491, GO:0055114
scaffold_46617_1	1448389.BAVQ01000037_gene2025	9.1e-64	249.6		1.18.1.2,1.19.1.1	ko:K00528			R10159		ko00000,ko01000				E	oxidoreductase	PANTHER, SUPERFAMILY, Gene3D, CDD, PANTHER	PTHR11938:SF91, SSF51905, G3DSA:3.40.50.720, cd05924, PTHR11938	FACL_like_5	IPR036188	FAD/NAD(P)-binding domain superfamily
scaffold_46652_1	1095772.CAHH01000026_gene2479	1.3e-38	166												S	Sulfatase-modifying factor enzyme 1	TMHMM	TMhelix	Region of a membrane-bound protein predicted to be embedded in the membrane.
scaffold_46664_1	1122130.AUHN01000005_gene2482	5.5e-27	126.7												E	G-D-S-L family lipolytic protein	Gene3D, SUPERFAMILY	G3DSA:3.40.50.1110, SSF52266		IPR036514	SGNH hydrolase superfamily
scaffold_46688_1	1448389.BAVQ01000006_gene3326	2.2e-62	245	ufaA1	2.1.1.317,2.1.1.79	ko:K00574,ko:K20238					ko00000,ko01000				M	synthase	SUPERFAMILY, Gene3D, PANTHER, PANTHER, Pfam	SSF53335, G3DSA:3.40.50.150, PTHR42912:SF25, PTHR42912, PF02353	Mycolic acid cyclopropane synthetase	IPR029063	S-adenosyl-L-methionine-dependent methyltransferase
scaffold_46704_1	1448389.BAVQ01000015_gene4139	1.8e-64	251.9		2.7.1.176	ko:K16214					ko00000,ko01000,ko02048				S	Zeta toxin	MobiDBLite, Gene3D	mobidb-lite, G3DSA:3.40.50.300	consensus disorder prediction
scaffold_46734_1	1448389.BAVQ01000029_gene672	9.5e-46	189.1												I	Belongs to the thiolase family	Gene3D, SUPERFAMILY, PANTHER	G3DSA:3.40.47.10, SSF53901, PTHR42870		IPR016039, IPR016039	Thiolase-like, Thiolase-like	GO:0003824, GO:0003824
scaffold_46767_1	1448389.BAVQ01000036_gene863	3.8e-62	244.2	topA	5.99.1.2	ko:K03168					ko00000,ko01000,ko03032,ko03400				L	Releases the supercoiling and torsional tension of DNA, which is introduced during the DNA replication and transcription, by transiently cleaving and rejoining one strand of the DNA duplex. Introduces a single-strand break via transesterification at a target site in duplex DNA. The scissile phosphodiester is attacked by the catalytic tyrosine of the enzyme, resulting in the formation of a DNA-(5-…	PANTHER, PANTHER, Gene3D, SMART, Pfam, Gene3D, SUPERFAMILY	PTHR42785:SF1, PTHR42785, G3DSA:1.10.460.10, SM00436, PF01131, G3DSA:2.70.20.10, SSF56712	DNA topoisomerase	IPR000380, IPR013824, IPR003601, IPR013497, IPR013825, IPR023405	DNA topoisomerase, type IA, DNA topoisomerase, type IA, central region, subdomain 1, DNA topoisomerase, type IA, domain 2, DNA topoisomerase, type IA, central, DNA topoisomerase, type IA, central region, subdomain 2, DNA topoisomerase, type IA, core domain	GO:0000287, GO:0003674, GO:0003824, GO:0003916, GO:0003917, GO:0005488, GO:0005575, GO:0005618, GO:0005622, GO:0005623, GO:0005737, GO:0005829, GO:0005886, GO:0008150, GO:0009892, GO:0010605, GO:0016020, GO:0016853, GO:0019219, GO:0019222, GO:0030312, GO:0031323, GO:0031324, GO:0032069, GO:0032074, GO:0040007, GO:0043086, GO:0043167, GO:0043169, GO:0044092, GO:0044424, GO:0044444, GO:0044464, GO:…
scaffold_46793_1	1448389.BAVQ01000043_gene1808	9.3e-69	266.2	ndh	1.6.99.3	ko:K03885	ko00190,map00190				ko00000,ko00001,ko01000				C	Pyridine nucleotide-disulphide oxidoreductase	Pfam, PANTHER, Gene3D, SUPERFAMILY, PANTHER	PF07992, PTHR42913:SF3, G3DSA:3.50.50.100, SSF51905, PTHR42913	Pyridine nucleotide-disulphide oxidoreductase	IPR023753, IPR036188	FAD/NAD(P)-binding domain, FAD/NAD(P)-binding domain superfamily	GO:0016491, GO:0055114
scaffold_46835_1	1448389.BAVQ01000002_gene2994	1.5e-71	275.4	murJ		ko:K03980					ko00000,ko01011,ko02000	2.A.66.4			KLT	Integral membrane protein MviN	Pfam, PANTHER, TMHMM, TMHMM, TMHMM	PF03023, PTHR47019, TMhelix, TMhelix, TMhelix	Lipid II flippase MurJ, Region of a membrane-bound protein predicted to be embedded in the membrane, Region of a membrane-bound protein predicted to be embedded in the membrane, Region of a membrane-bound protein predicted to be embedded in the membrane.	IPR004268	Peptidoglycan biosynthesis protein MurJ	GO:0003674, GO:0005215, GO:0005575, GO:0005576, GO:0005623, GO:0005886, GO:0005887, GO:0006810, GO:0006855, GO:0008150, GO:0015238, GO:0015893, GO:0016020, GO:0016021, GO:0022857, GO:0031224, GO:0031226, GO:0042221, GO:0042493, GO:0042891, GO:0042895, GO:0044425, GO:0044459, GO:0044464, GO:0046677, GO:0050896, GO:0051179, GO:0051234, GO:0055085, GO:0071944
scaffold_46978_1	1077144.AGFF01000004_gene2112	6e-68	263.5	add	3.5.4.4	ko:K01488	ko00230,ko01100,ko05340,map00230,map01100,map05340		R01560,R02556	RC00477	ko00000,ko00001,ko01000				F	Adenosine deaminase	SUPERFAMILY, PANTHER, Gene3D, Pfam, PANTHER	SSF51556, PTHR43114, G3DSA:3.20.20.140, PF00962, PTHR43114:SF3	Adenosine/AMP deaminase	IPR032466, IPR001365	Metal-dependent hydrolase, Adenosine/AMP deaminase domain	GO:0019239	Reactome: R-HSA-74217,
scaffold_46984_1	1448389.BAVQ01000036_gene912	1e-51	209.5												S	Alpha/beta hydrolase family	Gene3D, SUPERFAMILY, PANTHER, Pfam	G3DSA:3.40.50.1820, SSF53474, PTHR43194, PF12697	Alpha/beta hydrolase family	IPR029058, IPR029058, IPR000073	Alpha/Beta hydrolase fold, Alpha/Beta hydrolase fold, Alpha/beta hydrolase fold-1
scaffold_46986_2	1448389.BAVQ01000036_gene831	4.8e-14	82.4														NA	NA	NA	NA	NA	na	NA
scaffold_46998_1	1448389.BAVQ01000083_gene179	1.1e-61	242.7												S	PFAM LmbE family protein	PANTHER, Gene3D, PANTHER, SUPERFAMILY, Pfam	PTHR12993:SF20, G3DSA:3.40.50.10320, PTHR12993, SSF102588, PF02585	GlcNAc-PI de-N-acetylase	IPR024078, IPR003737, IPR024078, IPR003737	Putative deacetylase LmbE-like domain superfamily, N-acetylglucosaminyl phosphatidylinositol deacetylase-related, Putative deacetylase LmbE-like domain superfamily, N-acetylglucosaminyl phosphatidylinositol deacetylase-related		Reactome: R-HSA-162710, Reactome: R-HSA-162710, Reactome: R-HSA-162710, Reactome: R-HSA-162710
scaffold_47019_1	1448389.BAVQ01000022_gene1607	2.9e-54	218		2.3.1.16,2.3.1.9	ko:K00626,ko:K00632	ko00071,ko00072,ko00280,ko00281,ko00310,ko00362,ko00380,ko00592,ko00620,ko00630,ko00640,ko00642,ko00650,ko00720,ko00900,ko01100,ko01110,ko01120,ko01130,ko01200,ko01212,ko02020,map00071,map00072,map00280,map00281,map00310,map00362,map00380,map00592,map00620,map00630,map00640,map00642,map00650,map00720,map00900,map01100,map01110,map01120,map01130,map01200,map01212,map02020	M00087,M00088,M00095,M00113,M00373,M00374,M00375	R00238,R00829,R00927,R01177,R03778,R03858,R03991,R04546,R04742,R04747,R05506,R05586,R07891,R07895,R07899,R08091,R08095	RC00004,RC00326,RC00405,RC01702,RC02728,RC02898,RC02955	ko00000,ko00001,ko00002,ko01000,ko04147				I	Belongs to the thiolase family	Pfam, ProSitePatterns, Gene3D, PANTHER, PANTHER, SUPERFAMILY	PF00108, PS00098, G3DSA:3.40.47.10, PTHR18919, PTHR18919:SF12, SSF53901	Thiolase, N-terminal domain, Thiolases acyl-enzyme intermediate signature.	IPR020616, IPR020615, IPR016039, IPR016039	Thiolase, N-terminal, Thiolase, acyl-enzyme intermediate active site, Thiolase-like, Thiolase-like	GO:0016747, GO:0016747, GO:0003824, GO:0003824
scaffold_47086_1	1122622.ATWJ01000011_gene2295	1.6e-52	212.2												EGP	Major facilitator Superfamily	TMHMM, Pfam, Gene3D, TMHMM, SUPERFAMILY, CDD, TMHMM, PANTHER	TMhelix, PF05977, G3DSA:1.20.1250.20, TMhelix, SSF103473, cd06173, TMhelix, PTHR23513	Region of a membrane-bound protein predicted to be embedded in the membrane, Transmembrane secretion effector, Region of a membrane-bound protein predicted to be embedded in the membrane, MFS_MefA_like, Region of a membrane-bound protein predicted to be embedded in the membrane.	IPR010290, IPR036259	Transmembrane secretion effector, MFS transporter superfamily
scaffold_47097_2	1123065.ATWL01000004_gene2750	2.4e-32	144.8	mvaD	4.1.1.33	ko:K01597	ko00900,ko01100,ko01110,ko01130,map00900,map01100,map01110,map01130	M00095	R01121	RC00453	ko00000,ko00001,ko00002,ko01000				I	decarboxylase	Pfam, Gene3D, SUPERFAMILY	PF18376, G3DSA:3.30.70.890, SSF55060	Mevalonate 5-diphosphate decarboxylase C-terminal domain	IPR041431, IPR036554, IPR036554	Mvd1, C-terminal, GHMP kinase, C-terminal domain superfamily, GHMP kinase, C-terminal domain superfamily		KEGG: 00900+4.1.1.33, MetaCyc: PWY-7391, MetaCyc: PWY-922, Reactome: R-HSA-191273, Reactome: R-HSA-2426168, Reactome: R-HSA-446199,
scaffold_47125_1	1077144.AGFF01000007_gene1734	9.9e-63	246.1			ko:K13277	ko02024,map02024				ko00000,ko00001,ko01000,ko01002,ko03110				V	antibiotic catabolic process	MobiDBLite	mobidb-lite	consensus disorder prediction
scaffold_47155_1	471856.Jden_0581	3.2e-61	241.1	rpoC	2.7.7.6	ko:K03046	ko00230,ko00240,ko01100,ko03020,map00230,map00240,map01100,map03020	M00183	R00435,R00441,R00442,R00443	RC02795	br01611,ko00000,ko00001,ko00002,ko01000,ko03021,ko03400				K	DNA-dependent RNA polymerase catalyzes the transcription of DNA into RNA using the four ribonucleoside triphosphates as substrates	Coils, Pfam, SUPERFAMILY, Coils	Coil, PF04997, SSF64484, Coil	RNA polymerase Rpb1, domain 1	IPR007080	RNA polymerase Rpb1, domain 1	GO:0000428, GO:0005575, GO:0005618, GO:0005622, GO:0005623, GO:0005886, GO:0008150, GO:0016020, GO:0030312, GO:0030880, GO:0032991, GO:0040007, GO:0044424, GO:0044464, GO:0061695, GO:0071944, GO:1902494, GO:1990234GO:0003677, GO:0003899, GO:0006351
scaffold_47222_1	1448389.BAVQ01000022_gene1652	4.1e-47	193.7	iaaM	1.13.12.3	ko:K00466	ko00380,map00380		R00679	RC00213	ko00000,ko00001,ko01000			iJN746.PP_0383	E	amine oxidase	Gene3D, Pfam, PANTHER, SUPERFAMILY, PANTHER	G3DSA:3.50.50.60, PF01593, PTHR42923:SF10, SSF51905, PTHR42923	Flavin containing amine oxidoreductase	IPR036188, IPR002937, IPR036188	FAD/NAD(P)-binding domain superfamily, Amine oxidase, FAD/NAD(P)-binding domain superfamily	GO:0016491, GO:0055114
scaffold_47236_1	1448389.BAVQ01000071_gene2439	3.8e-70	270.8	accD4	2.1.3.15,6.4.1.3	ko:K01966	ko00280,ko00630,ko00640,ko01100,ko01120,ko01130,ko01200,map00280,map00630,map00640,map01100,map01120,map01130,map01200	M00373,M00741	R01859	RC00097,RC00609	ko00000,ko00001,ko00002,ko01000				I	Acetyl-CoA carboxylase, carboxyltransferase component (subunits alpha and beta)	ProSiteProfiles, PANTHER, SUPERFAMILY, Gene3D, Pfam, PANTHER	PS50980, PTHR43842, SSF52096, G3DSA:3.90.226.10, PF01039, PTHR43842:SF2	Acetyl-coenzyme A (CoA) carboxyltransferase N-terminal domain profile, Carboxyl transferase domain	IPR011762, IPR029045, IPR034733	Acetyl-coenzyme A carboxyltransferase, N-terminal, ClpP/crotonase-like domain superfamily, Acetyl-CoA carboxylase		MetaCyc: PWY-4381, MetaCyc: PWY-5743, MetaCyc: PWY-5744, MetaCyc: PWY-5789, MetaCyc: PWY-6722, Reactome: R-HSA-196780, MetaCyc: PWY-4381, MetaCyc: PWY-5743, MetaCyc: PWY-5744, MetaCyc: PWY-5789, MetaCyc: PWY-6722, Reactome: R-HSA-196780,
scaffold_47343_1	1448389.BAVQ01000083_gene295	8.9e-45	186	dapA	4.3.3.7	ko:K01714	ko00261,ko00300,ko01100,ko01110,ko01120,ko01130,ko01230,map00261,map00300,map01100,map01110,map01120,map01130,map01230	M00016,M00525,M00526,M00527	R10147	RC03062,RC03063	ko00000,ko00001,ko00002,ko01000				E	Catalyzes the condensation of (S)-aspartate-beta- semialdehyde (S)-ASA and pyruvate to 4-hydroxy- tetrahydrodipicolinate (HTPA)	Gene3D, PANTHER, SUPERFAMILY, TMHMM, Pfam	G3DSA:3.20.20.70, PTHR12128, SSF51569, TMhelix, PF00701	Region of a membrane-bound protein predicted to be embedded in the membrane, Dihydrodipicolinate synthetase family	IPR013785, IPR002220, IPR002220	Aldolase-type TIM barrel, DapA-like, DapA-like	GO:0003674, GO:0003824, GO:0005575, GO:0005623, GO:0005886, GO:0006082, GO:0006520, GO:0006553, GO:0006807, GO:0008150, GO:0008152, GO:0008652, GO:0008840, GO:0009058, GO:0009066, GO:0009067, GO:0009085, GO:0009089, GO:0009987, GO:0016020, GO:0016053, GO:0016829, GO:0016835, GO:0016836, GO:0019752, GO:0040007, GO:0043436, GO:0043648, GO:0044237, GO:0044238, GO:0044249, GO:0044281, GO:0044283, GO:…
scaffold_47386_1	1448389.BAVQ01000004_gene3689	1.2e-57	229.2	gpm	5.4.2.12	ko:K15634	ko00010,ko00260,ko00680,ko01100,ko01110,ko01120,ko01130,ko01200,ko01230,map00010,map00260,map00680,map01100,map01110,map01120,map01130,map01200,map01230	M00001,M00002,M00003	R01518	RC00536	ko00000,ko00001,ko00002,ko01000				G	Phosphoglycerate mutase	Pfam, Gene3D, SUPERFAMILY	PF00300, G3DSA:3.40.50.1240, SSF53254	Histidine phosphatase superfamily (branch 1)	IPR013078, IPR029033, IPR029033	Histidine phosphatase superfamily, clade-1, Histidine phosphatase superfamily, Histidine phosphatase superfamily
scaffold_47422_1	1448389.BAVQ01000013_gene3986	2.2e-50	204.9														NA	NA	NA	NA	NA	na	NA
scaffold_47483_1	1448389.BAVQ01000005_gene3057	2.7e-60	238	add	3.5.4.4	ko:K01488	ko00230,ko01100,ko05340,map00230,map01100,map05340		R01560,R02556	RC00477	ko00000,ko00001,ko01000			iNJ661.Rv3313c	F	Catalyzes the hydrolytic deamination of adenine to hypoxanthine. Plays an important role in the purine salvage pathway and in nitrogen catabolism	Pfam, PANTHER, PANTHER, Gene3D, SUPERFAMILY	PF00962, PTHR11409:SF43, PTHR11409, G3DSA:3.20.20.140, SSF51556	Adenosine/AMP deaminase	IPR001365, IPR032466	Adenosine/AMP deaminase domain, Metal-dependent hydrolase	GO:0003674, GO:0003824, GO:0004000, GO:0005575, GO:0005622, GO:0005623, GO:0005737, GO:0005829, GO:0006139, GO:0006144, GO:0006152, GO:0006154, GO:0006725, GO:0006807, GO:0008150, GO:0008152, GO:0009056, GO:0009058, GO:0009112, GO:0009113, GO:0009116, GO:0009119, GO:0009163, GO:0009164, GO:0009987, GO:0016787, GO:0016810, GO:0016814, GO:0017144, GO:0018130, GO:0019239, GO:0019438, GO:0019439, GO:…	Reactome: R-HSA-74217,
scaffold_47517_1	1448389.BAVQ01000071_gene2464	7.3e-74	283.1	gadB	4.1.1.15	ko:K01580	ko00250,ko00410,ko00430,ko00650,ko01100,ko01110,ko01120,ko02024,ko04727,ko04940,map00250,map00410,map00430,map00650,map01100,map01110,map01120,map02024,map04727,map04940	M00027	R00261,R00489,R01682,R02466	RC00299	ko00000,ko00001,ko00002,ko01000				E	Belongs to the group II decarboxylase family	Gene3D, Pfam, PANTHER, PANTHER, SUPERFAMILY	G3DSA:3.40.640.10, PF00282, PTHR43321, PTHR43321:SF3, SSF53383	Pyridoxal-dependent decarboxylase conserved domain	IPR015421, IPR002129, IPR010107, IPR015424	Pyridoxal phosphate-dependent transferase, major domain, Pyridoxal phosphate-dependent decarboxylase, Glutamate decarboxylase, Pyridoxal phosphate-dependent transferase	GO:0003824, GO:0016831, GO:0019752, GO:0030170, GO:0004351, GO:0006536, GO:0030170	KEGG: 00250+4.1.1.15, KEGG: 00410+4.1.1.15, KEGG: 00430+4.1.1.15, KEGG: 00650+4.1.1.15, MetaCyc: PWY-4321,
scaffold_47523_1	1448389.BAVQ01000009_gene3810	5.6e-58	230.3	prmC_1	2.1.1.297	ko:K02493			R10806	RC00003,RC03279	ko00000,ko01000,ko03012				J	Methyltransferase	CDD, TIGRFAM, PANTHER, SUPERFAMILY, ProSitePatterns, Gene3D, PANTHER, Pfam	cd02440, TIGR00537, PTHR45875:SF4, SSF53335, PS00092, G3DSA:3.40.50.150, PTHR45875, PF05175	AdoMet_MTases, hemK_rel_arch: putative methylase, N-6 Adenine-specific DNA methylases signature, Methyltransferase small domain	IPR004557, IPR029063, IPR002052, IPR007848	Eukaryotic/archaeal PrmC-related, S-adenosyl-L-methionine-dependent methyltransferase, DNA methylase, N-6 adenine-specific, conserved site, Methyltransferase small domain	GO:0008168, GO:0003676, GO:0008168, GO:0032259, GO:0008168	Reactome: R-HSA-156581, Reactome: R-HSA-72764,
scaffold_47567_1	1448389.BAVQ01000036_gene897	1.3e-30	139.4														MobiDBLite, TMHMM, TMHMM	mobidb-lite, TMhelix, TMhelix	consensus disorder prediction, Region of a membrane-bound protein predicted to be embedded in the membrane, Region of a membrane-bound protein predicted to be embedded in the membrane.
scaffold_47609_1	1448389.BAVQ01000023_gene1504	3.6e-26	124.4	moaB	4.2.1.96	ko:K01724	ko00790,map00790		R04734	RC01208	ko00000,ko00001,ko01000,ko04147				H	molybdenum cofactor	Gene3D, SUPERFAMILY	G3DSA:3.40.980.10, SSF53218		IPR036425, IPR036425	MoaB/Mog-like domain superfamily, MoaB/Mog-like domain superfamily
scaffold_47652_1	1448389.BAVQ01000071_gene2510	5.3e-72	276.9	gabD2	1.2.1.16,1.2.1.20,1.2.1.79,1.2.99.10	ko:K00135,ko:K22445	ko00250,ko00310,ko00350,ko00650,ko00760,ko01100,ko01120,map00250,map00310,map00350,map00650,map00760,map01100,map01120	M00027	R00713,R00714,R02401	RC00080	ko00000,ko00001,ko00002,ko01000				C	Belongs to the aldehyde dehydrogenase family	PANTHER, SUPERFAMILY, Pfam, Gene3D, PANTHER	PTHR11699, SSF53720, PF00171, G3DSA:3.40.605.10, PTHR11699:SF202	Aldehyde dehydrogenase family	IPR016161, IPR015590, IPR016162	Aldehyde/histidinol dehydrogenase, Aldehyde dehydrogenase domain, Aldehyde dehydrogenase, N-terminal	GO:0016491, GO:0055114, GO:0016491, GO:0055114, GO:0016491, GO:0055114
scaffold_47678_1	1448389.BAVQ01000080_gene372	2e-62	245	argK		ko:K07588					ko00000,ko01000				E	LAO AO transport system ATPase	Gene3D, PANTHER, SUPERFAMILY, CDD, Pfam, Gene3D	G3DSA:3.40.50.300, PTHR23408, SSF52540, cd03114, PF03308, G3DSA:1.10.287.130	MMAA-like, Methylmalonyl Co-A mutase-associated GTPase MeaB	IPR005129, IPR027417	SIMIBI class G3E GTPase, ArgK/MeaB, P-loop containing nucleoside triphosphate hydrolase	GO:0003674, GO:0003824, GO:0003924, GO:0016462, GO:0016787, GO:0016817, GO:0016818, GO:0017111GO:0003924, GO:0005525	Reactome: R-HSA-196741, Reactome: R-HSA-3359475, Reactome: R-HSA-3359478, Reactome: R-HSA-71032,
scaffold_47691_1	1095772.CAHH01000059_gene1416	5.7e-24	116.3	wag31											D	Cell division initiation protein	PANTHER, Pfam, TIGRFAM, Coils	PTHR35794, PF05103, TIGR03544, Coil	DivIVA protein, DivI1A_domain: DivIVA domain	IPR007793, IPR007793, IPR019933	DivIVA family, DivIVA family, DivIVA domain	GO:0005575, GO:0005618, GO:0005623, GO:0005886, GO:0008150, GO:0008360, GO:0009273, GO:0009987, GO:0016020, GO:0022603, GO:0022604, GO:0030312, GO:0031647, GO:0040007, GO:0042546, GO:0044085, GO:0044464, GO:0050789, GO:0050793, GO:0050794, GO:0050821, GO:0051128, GO:0060187, GO:0065007, GO:0065008, GO:0071554, GO:0071840, GO:0071944
scaffold_47701_1	1448389.BAVQ01000072_gene2647	1.2e-57	229.2	echA7	4.2.1.17,4.2.1.18	ko:K01692,ko:K13766	ko00071,ko00280,ko00281,ko00310,ko00360,ko00362,ko00380,ko00410,ko00627,ko00640,ko00650,ko00903,ko00930,ko01100,ko01110,ko01120,ko01130,ko01212,map00071,map00280,map00281,map00310,map00360,map00362,map00380,map00410,map00627,map00640,map00650,map00903,map00930,map01100,map01110,map01120,map01130,map01212	M00032,M00036,M00087	R02085,R03026,R03045,R04137,R04170,R04204,R04224,R04738,R04740,R04744,R04746,R04749,R05595,R06411,R06412,R06942,R08093	RC00831,RC00834,RC01086,RC01095,RC01098,RC01103,RC01217,RC02115,RC02416	ko00000,ko00001,ko00002,ko01000				I	Enoyl-CoA hydratase	CDD, Gene3D, PANTHER, SUPERFAMILY, Pfam	cd06558, G3DSA:3.90.226.10, PTHR42964, SSF52096, PF00378	crotonase-like, Enoyl-CoA hydratase/isomerase	IPR029045, IPR001753	ClpP/crotonase-like domain superfamily, Enoyl-CoA hydratase/isomerase	GO:0003824
scaffold_47708_1	1112204.GPOL_c28740	1.7e-14	85.9												S	Protein conserved in bacteria	NA	NA	NA	NA	NA	na	NA
scaffold_47724_1	1944.JOAZ01000032_gene425	3.4e-63	247.7			ko:K03307					ko00000	2.A.21			E	Belongs to the sodium solute symporter (SSF) (TC 2.A.21) family	Gene3D, TMHMM, Pfam, TMHMM, TMHMM, TMHMM, ProSiteProfiles, PANTHER	G3DSA:1.20.1730.10, TMhelix, PF00474, TMhelix, TMhelix, TMhelix, PS50283, PTHR46154	Region of a membrane-bound protein predicted to be embedded in the membrane, Sodium:solute symporter family, Region of a membrane-bound protein predicted to be embedded in the membrane, Region of a membrane-bound protein predicted to be embedded in the membrane, Region of a membrane-bound protein predicted to be embedded in the membrane, Sodium:solute symporter family profile.	IPR038377, IPR001734, IPR001734	Sodium/glucose symporter superfamily, Sodium/solute symporter, Sodium/solute symporter	GO:0016020, GO:0022857, GO:0055085, GO:0016020, GO:0022857, GO:0055085
scaffold_47730_1	1172188.KB911820_gene2858	1.5e-07	62.8			ko:K08307					ko00000,ko01000,ko01011				M	Transglycosylase SLT domain	MobiDBLite, PANTHER, MobiDBLite, Pfam, Gene3D, SUPERFAMILY	mobidb-lite, PTHR21666, mobidb-lite, PF01551, G3DSA:2.70.70.10, SSF51261	consensus disorder prediction, consensus disorder prediction, Peptidase family M23	IPR016047, IPR011055, IPR011055	Peptidase M23, Duplicated hybrid motif, Duplicated hybrid motif
scaffold_47739_1	1306174.JODP01000006_gene3478	1.5e-23	115.9	menD	2.2.1.9	ko:K02551	ko00130,ko01100,ko01110,map00130,map01100,map01110	M00116	R08165	RC02186	ko00000,ko00001,ko00002,ko01000			iSB619.SA_RS05085	H	Catalyzes the thiamine diphosphate-dependent decarboxylation of 2-oxoglutarate and the subsequent addition of the resulting succinic semialdehyde-thiamine pyrophosphate anion to isochorismate to yield 2-succinyl-5-enolpyruvyl-6-hydroxy-3- cyclohexene-1-carboxylate (SEPHCHC)	Gene3D, SUPERFAMILY, PANTHER	G3DSA:3.40.50.970, SSF52518, PTHR42916		IPR029061, IPR004433	Thiamin diphosphate-binding fold, 2-succinyl-5-enolpyruvyl-6-hydroxy-3-cyclohexene-1-carboxylic-acid synthase	GO:0005575, GO:0005623, GO:0005886, GO:0008150, GO:0016020, GO:0040007, GO:0044464, GO:0071944GO:0009234, GO:0030976, GO:0070204	KEGG: 00130+2.2.1.9, MetaCyc: PWY-5837
scaffold_47797_1	44060.JODL01000018_gene4614	5.4e-53	213.8		1.8.1.9	ko:K00384	ko00450,map00450		R02016,R03596,R09372	RC00013,RC02518,RC02873	ko00000,ko00001,ko01000				O	pyridine nucleotide-disulphide oxidoreductase	TMHMM, PANTHER, SUPERFAMILY, Gene3D, PRINTS, PRINTS, Pfam, PANTHER, Gene3D, PRINTS, PRINTS, PRINTS	TMhelix, PTHR42817:SF1, SSF51905, G3DSA:3.50.50.60, PR00368, PR00368, PF07992, PTHR42817, G3DSA:3.50.50.60, PR00469, PR00469, PR00469	Region of a membrane-bound protein predicted to be embedded in the membrane, FAD-dependent pyridine nucleotide reductase signature, FAD-dependent pyridine nucleotide reductase signature, Pyridine nucleotide-disulphide oxidoreductase, Pyridine nucleotide disulphide reductase class-II signature, Pyridine nucleotide disulphide reductase class-II signature, Pyridine nucleotide disulphide reductase cl…	IPR036188, IPR036188, IPR023753, IPR036188	FAD/NAD(P)-binding domain superfamily, FAD/NAD(P)-binding domain superfamily, FAD/NAD(P)-binding domain, FAD/NAD(P)-binding domain superfamily	GO:0016491, GO:0055114
scaffold_47874_1	1095772.CAHH01000031_gene1773	2.4e-56	224.9	proB	2.7.2.11	ko:K00931	ko00330,ko00332,ko01100,ko01130,ko01230,map00330,map00332,map01100,map01130,map01230	M00015	R00239	RC00002,RC00043	ko00000,ko00001,ko00002,ko01000				E	Catalyzes the transfer of a phosphate group to glutamate to form L-glutamate 5-phosphate	PRINTS, PRINTS, PRINTS, PANTHER, SUPERFAMILY, Gene3D, PANTHER, Pfam	PR00474, PR00474, PR00474, PTHR43654:SF3, SSF53633, G3DSA:3.40.1160.10, PTHR43654, PF00696	Glutamate 5-kinase family signature, Glutamate 5-kinase family signature, Glutamate 5-kinase family signature, Amino acid kinase family	IPR001057, IPR001057, IPR001057, IPR036393, IPR036393, IPR001048	Glutamate/acetylglutamate kinase, Glutamate/acetylglutamate kinase, Glutamate/acetylglutamate kinase, Acetylglutamate kinase-like superfamily, Acetylglutamate kinase-like superfamily, Aspartate/glutamate/uridylate kinase	GO:0003674, GO:0003824, GO:0004349, GO:0005575, GO:0005622, GO:0005623, GO:0005737, GO:0005829, GO:0006082, GO:0006520, GO:0006560, GO:0006561, GO:0006793, GO:0006796, GO:0006807, GO:0008150, GO:0008152, GO:0008652, GO:0009058, GO:0009064, GO:0009084, GO:0009987, GO:0016053, GO:0016301, GO:0016310, GO:0016740, GO:0016772, GO:0016774, GO:0018130, GO:0019202, GO:0019752, GO:0040007, GO:0043436, GO:…	Reactome: R-HSA-8964539, Reactome: R-HSA-8964539, Reactome: R-HSA-8964539, Reactome: R-HSA-8964539
scaffold_47913_1	1448389.BAVQ01000070_gene2385	6e-60	236.9	trkH		ko:K03498					ko00000,ko02000	2.A.38.1,2.A.38.4			P	Potassium uptake protein	Pfam, TMHMM, PANTHER, PANTHER, TMHMM, TMHMM	PF02386, TMhelix, PTHR32024:SF1, PTHR32024, TMhelix, TMhelix	Cation transport protein, Region of a membrane-bound protein predicted to be embedded in the membrane, Region of a membrane-bound protein predicted to be embedded in the membrane, Region of a membrane-bound protein predicted to be embedded in the membrane.	IPR003445	Cation transporter	GO:0006812, GO:0008324, GO:0055085
scaffold_47971_1	1448389.BAVQ01000004_gene3692	4.4e-63	247.3	gltB	1.4.1.13,1.4.1.14,1.4.7.1	ko:K00265,ko:K00284	ko00250,ko00630,ko00910,ko01100,ko01110,ko01120,ko01130,ko01230,map00250,map00630,map00910,map01100,map01110,map01120,map01130,map01230		R00021,R00093,R00114,R00248,R10086	RC00006,RC00010,RC02799	ko00000,ko00001,ko01000				E	Glutamate synthase	SUPERFAMILY, PANTHER, Pfam, Gene3D, PANTHER	SSF51395, PTHR11938, PF04898, G3DSA:3.20.20.70, PTHR11938:SF132	Glutamate synthase central domain	IPR006982, IPR013785	Glutamate synthase, central-N, Aldolase-type TIM barrel	GO:0003674, GO:0003824, GO:0005575, GO:0005622, GO:0005623, GO:0005737, GO:0005829, GO:0005886, GO:0006082, GO:0006520, GO:0006536, GO:0006537, GO:0006541, GO:0006807, GO:0008150, GO:0008152, GO:0008652, GO:0009058, GO:0009064, GO:0009084, GO:0009987, GO:0015930, GO:0016020, GO:0016053, GO:0016491, GO:0016638, GO:0019676, GO:0019740, GO:0019752, GO:0040007, GO:0043436, GO:0043648, GO:0043650, GO:…
scaffold_48002_1	1276920.ADIAG_00477	3e-59	234.6												G	Major facilitator superfamily	TMHMM, TMHMM, ProSiteProfiles, PANTHER, CDD, TMHMM, SUPERFAMILY, Gene3D, TMHMM, PANTHER	TMhelix, TMhelix, PS50850, PTHR23508:SF20, cd17371, TMhelix, SSF103473, G3DSA:1.20.1250.20, TMhelix, PTHR23508	Region of a membrane-bound protein predicted to be embedded in the membrane, Region of a membrane-bound protein predicted to be embedded in the membrane, Major facilitator superfamily (MFS) profile, MFS_MucK, Region of a membrane-bound protein predicted to be embedded in the membrane, Region of a membrane-bound protein predicted to be embedded in the membrane.	IPR020846, IPR036259	Major facilitator superfamily domain, MFS transporter superfamily
scaffold_48137_1	1448389.BAVQ01000015_gene4131	3.5e-28	131.3	traA											L	DNA-dependent ATPase and ATP-dependent 5-3 DNA helicase. Has no activity on blunt DNA or DNA with 3-overhangs, requires at least 10 bases of 5-ssDNA for helicase activity	NA	NA	NA	NA	NA	na	NA
scaffold_48190_1	1292020.H483_0101455	1.5e-07	62.8												E	GDSL-like Lipase/Acylhydrolase family	Gene3D, MobiDBLite, SignalP_GRAM_POSITIVE, SignalP_EUK, SignalP_GRAM_NEGATIVE, MobiDBLite, SUPERFAMILY	G3DSA:3.40.50.1110, mobidb-lite, SignalP-TM, SignalP-noTM, SignalP-noTM, mobidb-lite, SSF52266	consensus disorder prediction, consensus disorder prediction	IPR036514	SGNH hydrolase superfamily
scaffold_48269_1	1448389.BAVQ01000025_gene1256	9.3e-13	78.2		1.17.1.1	ko:K12452	ko00520,map00520		R03391,R03392	RC00230	ko00000,ko00001,ko01000				E	Belongs to the DegT DnrJ EryC1 family	NA	NA	NA	NA	NA	na	NA
[truncated: 123,477 more rows]
