# Supplementary material for: First metagenomic analysis of the Andean condor (Vultur gryphus) gut microbiome reveals microbial diversity and wide resistome
Source: PeerJ. 2023 Jul 7;11:e15235. doi: 10.7717/peerj.15235 (PMC10332357; doi:10.7717/peerj.15235)
Supplement: Supplemental Information 3 [file peerj-11-15235-s003.xlsx]

## Sheet: Hoja1
geneID	length	Target_id	Target_length	E-value	Identity	Target_name	Specie
scaffold_529_4	353	VFG037984	349	3.9e-134	65.4	VFG037984 (ABK1_0091) sialic acid synthase Capsule (CVF775)	Acinetobacter baumannii 1656-2
scaffold_529_7	231	VFG037939	230	5.4e-76	62.4	VFG037939 (ABK1_0088) Putative NeuA Capsule (CVF775)	Acinetobacter baumannii 1656-2
scaffold_529_8	391	VFG037924	386	1.5e-147	66.1	VFG037924 (ABK1_0087) DegT/DnrJ/EryC1/StrS aminotransferase Capsule (CVF775)	Acinetobacter baumannii 1656-2
scaffold_529_9	333	VFG037909	332	1.2e-156	79.8	VFG037909 (ABK1_0086) Polysaccharide biosynthesis protein CapD Capsule (CVF775)	Acinetobacter baumannii 1656-2
scaffold_10951_2	155	VFG037819	300	4.0e-51	60.1	VFG037819 (lpxC) lpxC LPS (CVF774)	Acinetobacter baumannii 1656-2
scaffold_45887_1	84	VFG037789	262	8.9e-13	71.6	VFG037789 (lpxA) lpxA LPS (CVF774)	Acinetobacter baumannii 1656-2
scaffold_48015_2	123	VFG037939	230	2.8e-39	62.1	VFG037939 (ABK1_0088) Putative NeuA Capsule (CVF775)	Acinetobacter baumannii 1656-2
scaffold_53025_1	91	VFG037939	230	1.8e-27	63.6	VFG037939 (ABK1_0088) Putative NeuA Capsule (CVF775)	Acinetobacter baumannii 1656-2
scaffold_78513_1	100	VFG037789	262	6.6e-23	61.8	VFG037789 (lpxA) lpxA LPS (CVF774)	Acinetobacter baumannii 1656-2
scaffold_25900_1	135	VFG037910	340	3.5e-43	65.5	VFG037910 (AB57_0095) VI polysaccharide biosynthesis protein VipB/tviC Capsule (CVF775)	Acinetobacter baumannii AB0057
scaffold_81800_1	43	VFG038104	340	2.5e-11	65.9	VFG038104 (galE) UDP-glucose 4-epimerase Capsule (CVF775)	Acinetobacter baumannii AB0057
scaffold_10146_1	433	VFG038031	424	6.0e-137	60.2	VFG038031 (ABBFA_003458) protein capL Capsule (CVF775)	Acinetobacter baumannii AB307-0294
scaffold_12026_2	328	VFG038031	424	5.0e-112	64.5	VFG038031 (ABBFA_003458) protein capL Capsule (CVF775)	Acinetobacter baumannii AB307-0294
scaffold_15079_2	216	VFG038016	340	1.2e-90	78.4	VFG038016 (ABBFA_003457) Vi polysaccharide biosynthesis protein vipB/tviC Capsule (CVF775)	Acinetobacter baumannii AB307-0294
scaffold_23378_1	109	VFG037926	391	5.3e-42	74.3	VFG037926 (ABBFA_003451) spore coat polysaccharide biosynthesis protein spsC Capsule (CVF775)	Acinetobacter baumannii AB307-0294
scaffold_37512_1	169	VFG038016	340	6.0e-77	78.1	VFG038016 (ABBFA_003457) Vi polysaccharide biosynthesis protein vipB/tviC Capsule (CVF775)	Acinetobacter baumannii AB307-0294
scaffold_64316_1	116	VFG038031	424	1.2e-47	73.0	VFG038031 (ABBFA_003458) protein capL Capsule (CVF775)	Acinetobacter baumannii AB307-0294
scaffold_16073_1	96	VFG038219	238	6.8e-41	81.7	VFG038219 (bfmR) biofilm-controlling response regulator BfmRS (VF0463)	Acinetobacter baumannii ACICU
scaffold_27344_1	121	VFG038219	238	3.9e-54	86.7	VFG038219 (bfmR) biofilm-controlling response regulator BfmRS (VF0463)	Acinetobacter baumannii ACICU
scaffold_31758_2	66	VFG038234	549	1.8e-13	80.0	VFG038234 (bfmS) signal transduction histidine kinase BfmRS (VF0463)	Acinetobacter baumannii ACICU
scaffold_38540_1	69	VFG038219	238	1.4e-24	78.1	VFG038219 (bfmR) biofilm-controlling response regulator BfmRS (VF0463)	Acinetobacter baumannii ACICU
scaffold_53778_1	62	VFG038219	238	3.8e-29	98.4	VFG038219 (bfmR) biofilm-controlling response regulator BfmRS (VF0463)	Acinetobacter baumannii ACICU
scaffold_13_82	431	VFG037898	345	3.0e-112	61.6	VFG037898 (A1S_0052) WecC protein Capsule (CVF775)	Acinetobacter baumannii ATCC 17978
scaffold_827_5	276	VFG037793	228	1.3e-44	63.6	VFG037793 (lpxA) UDP-N-acetylglucosamine acyltransferase LPS (CVF774)	Acinetobacter baumannii ATCC 17978
scaffold_7343_1	253	VFG037793	228	9.7e-55	73.0	VFG037793 (lpxA) UDP-N-acetylglucosamine acyltransferase LPS (CVF774)	Acinetobacter baumannii ATCC 17978
scaffold_13674_1	240	VFG037823	276	2.5e-84	61.1	VFG037823 (lpxC) UDP-3-O-3-hydroxymyristoyl N-acetylglucosamine deacetylase LPS (CVF774)	Acinetobacter baumannii ATCC 17978
scaffold_10671_1	79	VFG037974	204	1.4e-20	60.8	VFG037974 (ABAYE3808) UDP-galactose phosphate transferase (WeeH) Capsule (CVF775)	Acinetobacter baumannii AYE
scaffold_47187_1	146	VFG037974	204	1.2e-44	65.5	VFG037974 (ABAYE3808) UDP-galactose phosphate transferase (WeeH) Capsule (CVF775)	Acinetobacter baumannii AYE
scaffold_2755_5	229	VFG037990	446	4.9e-90	68.9	VFG037990 (BJAB07104_00096) putative UDP-glucose 6-dehydrogenase Capsule (CVF775)	Acinetobacter baumannii BJAB07104
scaffold_10296_2	220	VFG037990	446	2.0e-88	73.8	VFG037990 (BJAB07104_00096) putative UDP-glucose 6-dehydrogenase Capsule (CVF775)	Acinetobacter baumannii BJAB07104
scaffold_21207_2	67	VFG038121	338	4.4e-15	76.1	VFG038121 (BJAB07104_00105) UDP-glucose 4-epimerase Capsule (CVF775)	Acinetobacter baumannii BJAB07104
scaffold_22852_2	122	VFG038020	176	5.8e-37	60.4	VFG038020 (BJAB07104_00098) Sugar transferases involved in lipopolysaccharide synthesis Capsule (CVF775)	Acinetobacter baumannii BJAB07104
scaffold_27539_1	115	VFG038020	176	1.9e-21	62.5	VFG038020 (BJAB07104_00098) Sugar transferases involved in lipopolysaccharide synthesis Capsule (CVF775)	Acinetobacter baumannii BJAB07104
scaffold_42165_2	53	VFG037990	446	2.5e-13	62.7	VFG037990 (BJAB07104_00096) putative UDP-glucose 6-dehydrogenase Capsule (CVF775)	Acinetobacter baumannii BJAB07104
scaffold_61424_2	50	VFG038121	338	1.3e-11	72.1	VFG038121 (BJAB07104_00105) UDP-glucose 4-epimerase Capsule (CVF775)	Acinetobacter baumannii BJAB07104
scaffold_67891_1	115	VFG037990	446	1.3e-38	68.4	VFG037990 (BJAB07104_00096) putative UDP-glucose 6-dehydrogenase Capsule (CVF775)	Acinetobacter baumannii BJAB07104
scaffold_168_5	379	VFG037294	383	4.4e-160	70.2	VFG037294 (basG) histidine decarboxylase Acinetobactin (CVF768)	Acinetobacter baumannii D1279779
scaffold_203_8	430	VFG037903	424	1.4e-154	61.3	VFG037903 (ugd) UDP-glucose 6-dehydrogenase Capsule (CVF775)	Acinetobacter baumannii D1279779
scaffold_22046_1	236	VFG037993	344	2.8e-96	73.2	VFG037993 (fnlA) UDP-N-acetylglucosamine 4,6-dehydratase Capsule (CVF775)	Acinetobacter baumannii D1279779
scaffold_20963_1	252	VFG037859	456	4.4e-100	65.9	VFG037859 (ABTJ_03743) phosphomannomutase Capsule (CVF775)	Acinetobacter baumannii MDR-TJ
scaffold_75736_1	104	VFG037874	338	9.6e-33	62.1	VFG037874 (ABTJ_03744) UDP-glucose-4-epimerase Capsule (CVF775)	Acinetobacter baumannii MDR-TJ
scaffold_57865_1	129	VFG037920	382	2.9e-47	67.4	VFG037920 (ABZJ_00079) putative polysaccharide biosynthesis protein Capsule (CVF775)	Acinetobacter baumannii MDR-ZJ06
scaffold_80057_1	98	VFG037905	398	3.8e-39	74.2	VFG037905 (ABZJ_00078) putative nucleoside-diphosphate sugar epimerase Capsule (CVF775)	Acinetobacter baumannii MDR-ZJ06
scaffold_21091_2	73	VFG038150	456	1.1e-11	62.5	VFG038150 (manB) bifunctional phosphomannomutase/phosphoglucomutas Capsule (CVF775)	Acinetobacter baumannii SDF
scaffold_37682_1	169	VFG038127	556	7.9e-69	65.7	VFG038127 (pgi) glucose-6-phosphate isomerase Capsule (CVF775)	Acinetobacter baumannii SDF
scaffold_203_1	291	VFG037938	290	3.1e-105	64.1	VFG037938 (M3Q_286) bifunctional UDP-N-acetylglucosamine pyrophosphorylase/glucosamine-1-phosphate N-acetyltransferase Capsule (CVF775)	Acinetobacter baumannii TYTH-1
scaffold_2709_1	163	VFG037923	352	4.9e-68	77.8	VFG037923 (M3Q_285) nucleoside-diphosphate sugar epimerase Capsule (CVF775)	Acinetobacter baumannii TYTH-1
scaffold_7489_2	267	VFG037938	290	2.2e-121	76.7	VFG037938 (M3Q_286) bifunctional UDP-N-acetylglucosamine pyrophosphorylase/glucosamine-1-phosphate N-acetyltransferase Capsule (CVF775)	Acinetobacter baumannii TYTH-1
scaffold_23868_1	138	VFG037938	290	1.8e-55	72.6	VFG037938 (M3Q_286) bifunctional UDP-N-acetylglucosamine pyrophosphorylase/glucosamine-1-phosphate N-acetyltransferase Capsule (CVF775)	Acinetobacter baumannii TYTH-1
scaffold_26594_1	212	VFG037938	290	1.1e-75	65.1	VFG037938 (M3Q_286) bifunctional UDP-N-acetylglucosamine pyrophosphorylase/glucosamine-1-phosphate N-acetyltransferase Capsule (CVF775)	Acinetobacter baumannii TYTH-1
scaffold_44897_1	151	VFG037923	352	2.3e-43	61.2	VFG037923 (M3Q_285) nucleoside-diphosphate sugar epimerase Capsule (CVF775)	Acinetobacter baumannii TYTH-1
scaffold_47603_1	146	VFG037923	352	9.2e-66	80.1	VFG037923 (M3Q_285) nucleoside-diphosphate sugar epimerase Capsule (CVF775)	Acinetobacter baumannii TYTH-1
scaffold_48228_1	144	VFG037938	290	4.7e-46	60.1	VFG037938 (M3Q_286) bifunctional UDP-N-acetylglucosamine pyrophosphorylase/glucosamine-1-phosphate N-acetyltransferase Capsule (CVF775)	Acinetobacter baumannii TYTH-1
scaffold_48453_1	144	VFG037923	352	1.5e-44	61.2	VFG037923 (M3Q_285) nucleoside-diphosphate sugar epimerase Capsule (CVF775)	Acinetobacter baumannii TYTH-1
scaffold_73446_1	107	VFG037938	290	4.9e-32	60.7	VFG037938 (M3Q_286) bifunctional UDP-N-acetylglucosamine pyrophosphorylase/glucosamine-1-phosphate N-acetyltransferase Capsule (CVF775)	Acinetobacter baumannii TYTH-1
scaffold_73537_1	107	VFG037938	290	1.6e-46	80.4	VFG037938 (M3Q_286) bifunctional UDP-N-acetylglucosamine pyrophosphorylase/glucosamine-1-phosphate N-acetyltransferase Capsule (CVF775)	Acinetobacter baumannii TYTH-1
scaffold_80_9	245	VFG038840	244	3.8e-104	80.3	VFG038840 (flmH) 3-oxoacyl-ACP reductase Polar flagella (VF0473)	Aeromonas hydrophila ML09-119
scaffold_285_8	173	VFG038370	172	2.0e-96	95.3	VFG038370 (hcp) HcpA-like protein T6SS (VF0480)	Aeromonas hydrophila ML09-119
scaffold_285_9	675	VFG038368	926	8.4e-271	79.6	VFG038368 (vgrG1) Rhs element Vgr protein T6SS (VF0480)	Aeromonas hydrophila ML09-119
scaffold_377_6	677	VFG038372	682	6.9e-249	73.0	VFG038372 (vgrG2) Rhs element Vgr family protein T6SS (VF0480)	Aeromonas hydrophila ML09-119
scaffold_621_2	251	VFG038845	253	4.1e-106	77.5	VFG038845 (nueA) 3-deoxy-D-manno-octulosonate cytidylyltransferase Polar flagella (VF0473)	Aeromonas hydrophila ML09-119
scaffold_3160_4	252	VFG038845	253	1.8e-80	63.1	VFG038845 (nueA) 3-deoxy-D-manno-octulosonate cytidylyltransferase Polar flagella (VF0473)	Aeromonas hydrophila ML09-119
scaffold_4703_1	346	VFG038687	473	3.9e-123	69.6	VFG038687 (flhF) flagellar biosynthesis protein FlhF Polar flagella (VF0473)	Aeromonas hydrophila ML09-119
scaffold_8936_2	77	VFG038840	244	1.5e-22	70.1	VFG038840 (flmH) 3-oxoacyl-ACP reductase Polar flagella (VF0473)	Aeromonas hydrophila ML09-119
scaffold_12458_1	364	VFG038687	473	3.6e-119	62.1	VFG038687 (flhF) flagellar biosynthesis protein FlhF Polar flagella (VF0473)	Aeromonas hydrophila ML09-119
scaffold_14189_2	168	VFG038683	700	1.4e-62	75.9	VFG038683 (flhA) flagellar biosynthesis protein FlhA Polar flagella (VF0473)	Aeromonas hydrophila ML09-119
scaffold_15404_1	186	VFG038753	277	8.7e-53	61.7	VFG038753 (motY) sodium-type flagellar protein MotY Polar flagella (VF0473)	Aeromonas hydrophila ML09-119
scaffold_20883_1	173	VFG038840	244	3.3e-78	84.9	VFG038840 (flmH) 3-oxoacyl-ACP reductase Polar flagella (VF0473)	Aeromonas hydrophila ML09-119
scaffold_25725_1	217	VFG038687	473	8.9e-49	61.8	VFG038687 (flhF) flagellar biosynthesis protein FlhF Polar flagella (VF0473)	Aeromonas hydrophila ML09-119
scaffold_30386_1	194	VFG038683	700	7.7e-76	72.2	VFG038683 (flhA) flagellar biosynthesis protein FlhA Polar flagella (VF0473)	Aeromonas hydrophila ML09-119
scaffold_44924_2	41	VFG038840	244	6.9e-11	80.5	VFG038840 (flmH) 3-oxoacyl-ACP reductase Polar flagella (VF0473)	Aeromonas hydrophila ML09-119
scaffold_46649_1	147	VFG038707	729	7.9e-41	67.9	VFG038707 (cheA-2) chemotaxis protein CheA Polar flagella (VF0473)	Aeromonas hydrophila ML09-119
scaffold_47633_1	65	VFG038840	244	1.7e-24	81.3	VFG038840 (flmH) 3-oxoacyl-ACP reductase Polar flagella (VF0473)	Aeromonas hydrophila ML09-119
scaffold_56135_1	131	VFG038840	244	1.9e-38	62.6	VFG038840 (flmH) 3-oxoacyl-ACP reductase Polar flagella (VF0473)	Aeromonas hydrophila ML09-119
scaffold_72755_1	101	VFG038840	244	3.5e-40	82.0	VFG038840 (flmH) 3-oxoacyl-ACP reductase Polar flagella (VF0473)	Aeromonas hydrophila ML09-119
scaffold_97_20	116	VFG043174	108	1.8e-16	62.9	VFG043174 (fliE) FliEL ND (AI143)	Aeromonas hydrophila str. AH-3
scaffold_97_24	444	VFG043178	443	6.3e-158	66.9	VFG043178 (fliI) FliIL ND (AI143)	Aeromonas hydrophila str. AH-3
scaffold_97_30	141	VFG043184	141	3.2e-39	61.6	VFG043184 (flgC) FlgCL ND (AI143)	Aeromonas hydrophila str. AH-3
scaffold_3743_5	67	VFG043195(gb|AAK20919)	279	3.6e-17	63.1	VFG043195(gb|AAK20919) (lafA) lateral flagellin LafA ND (AI143)	Aeromonas hydrophila str. AH-3
scaffold_12102_1	259	VFG043178	443	3.6e-73	60.4	VFG043178 (fliI) FliIL ND (AI143)	Aeromonas hydrophila str. AH-3
scaffold_12800_2	107	VFG043174	108	2.8e-19	67.6	VFG043174 (fliE) FliEL ND (AI143)	Aeromonas hydrophila str. AH-3
scaffold_22022_1	241	VFG043186	397	2.6e-81	60.5	VFG043186 (flgE) FlgEL ND (AI143)	Aeromonas hydrophila str. AH-3
scaffold_23021_2	140	VFG043184	141	4.0e-42	61.2	VFG043184 (flgC) FlgCL ND (AI143)	Aeromonas hydrophila str. AH-3
scaffold_23652_1	49	VFG043189	223	2.1e-14	70.2	VFG043189 (flgH) FlgHL ND (AI143)	Aeromonas hydrophila str. AH-3
scaffold_25123_1	127	VFG043195(gb|AAK20919)	279	9.9e-48	77.0	VFG043195(gb|AAK20919) (lafA) lateral flagellin LafA ND (AI143)	Aeromonas hydrophila str. AH-3
scaffold_28279_2	107	VFG043174	108	2.1e-19	67.6	VFG043174 (fliE) FliEL ND (AI143)	Aeromonas hydrophila str. AH-3
scaffold_38556_1	149	VFG043195(gb|AAK20919)	279	7.5e-55	75.8	VFG043195(gb|AAK20919) (lafA) lateral flagellin LafA ND (AI143)	Aeromonas hydrophila str. AH-3
scaffold_46410_2	114	VFG043176	342	9.8e-31	62.9	VFG043176 (fliG) FliGL ND (AI143)	Aeromonas hydrophila str. AH-3
scaffold_48890_2	57	VFG043186	397	4.0e-17	75.4	VFG043186 (flgE) FlgEL ND (AI143)	Aeromonas hydrophila str. AH-3
scaffold_59930_1	114	VFG043195(gb|AAK20919)	279	1.8e-45	82.5	VFG043195(gb|AAK20919) (lafA) lateral flagellin LafA ND (AI143)	Aeromonas hydrophila str. AH-3
scaffold_134_5	343	VFG038630	353	3.3e-138	74.5	VFG038630 (fliG) flagellar motor switch protein G ND (AI144)	Aeromonas hydrophila subsp. hydrophila ATCC 7966
scaffold_134_25	378	VFG038710	371	3.1e-145	72.5	VFG038710 (cheB-2) chemotaxis-specific methylesterase ND (AI144)	Aeromonas hydrophila subsp. hydrophila ATCC 7966
scaffold_308_3	869	VFG038395	880	0.0e+00	81.9	VFG038395 (clpB) type VI secretion system ATPase ClpV1 T6SS (SS194)	Aeromonas hydrophila subsp. hydrophila ATCC 7966
scaffold_308_5	447	VFG038391	444	8.1e-230	90.8	VFG038391 (AHA_1839) Type VI secretion system protein T6SS (SS194)	Aeromonas hydrophila subsp. hydrophila ATCC 7966
scaffold_308_6	172	VFG038389	171	4.0e-76	81.3	VFG038389 (AHA_1838) Type VI secretion system protein T6SS (SS194)	Aeromonas hydrophila subsp. hydrophila ATCC 7966
scaffold_308_7	414	VFG038387	416	1.0e-157	68.3	VFG038387 (AHA_1837) Type VI secretion system protein T6SS (SS194)	Aeromonas hydrophila subsp. hydrophila ATCC 7966
scaffold_308_8	333	VFG038385	332	1.7e-152	79.2	VFG038385 (AHA_1836) Type VI secretion system protein T6SS (SS194)	Aeromonas hydrophila subsp. hydrophila ATCC 7966
scaffold_308_9	589	VFG038383	588	1.2e-302	84.7	VFG038383 (AHA_1835) Type VI secretion system protein T6SS (SS194)	Aeromonas hydrophila subsp. hydrophila ATCC 7966
scaffold_308_10	144	VFG038381	143	1.8e-61	80.4	VFG038381 (AHA_1834) Type VI secretion system protein T6SS (SS194)	Aeromonas hydrophila subsp. hydrophila ATCC 7966
scaffold_308_11	493	VFG038380	490	1.2e-266	91.8	VFG038380 (AHA_1833) Type VI secretion system contractile sheath large subunit TssC/VipB T6SS (SS194)	Aeromonas hydrophila subsp. hydrophila ATCC 7966
scaffold_377_3	1166	VFG038402	1161	0.0e+00	73.3	VFG038402 (vasK/icmF) Type VI secretion system protein T6SS (SS194)	Aeromonas hydrophila subsp. hydrophila ATCC 7966
scaffold_377_4	471	VFG038403	476	9.9e-186	70.2	VFG038403 (AHA_1846) Type VI secretion system protein T6SS (SS194)	Aeromonas hydrophila subsp. hydrophila ATCC 7966
scaffold_377_5	96	VFG038405	95	1.3e-44	88.4	VFG038405 (AHA_1847) PAAR motif-containing protein T6SS (SS194)	Aeromonas hydrophila subsp. hydrophila ATCC 7966
scaffold_382_2	367	VFG038463	344	3.1e-142	73.6	VFG038463 (tapT) twitching ATPase Tap type IV pili (CVF783)	Aeromonas hydrophila subsp. hydrophila ATCC 7966
scaffold_1356_2	401	VFG038710	371	1.1e-140	65.9	VFG038710 (cheB-2) chemotaxis-specific methylesterase ND (AI144)	Aeromonas hydrophila subsp. hydrophila ATCC 7966
scaffold_1356_5	262	VFG038722	264	1.9e-93	66.1	VFG038722 (AHA_1389) CobQ/CobB/MinD/ParA family protein Polar flagella (CVF786)	Aeromonas hydrophila subsp. hydrophila ATCC 7966
scaffold_1356_7	163	VFG043204	162	5.5e-67	77.8	VFG043204 (cheW-2) chemotaxis protein CheW ND (AI144)	Aeromonas hydrophila subsp. hydrophila ATCC 7966
scaffold_2835_4	134	VFG038807	132	8.8e-47	64.1	VFG038807 (flgB) flagellar basal-body rod protein FlgB ND (AI144)	Aeromonas hydrophila subsp. hydrophila ATCC 7966
scaffold_2835_6	50	VFG038815	303	1.2e-17	81.6	VFG038815 (cheV) CheV ND (AI144)	Aeromonas hydrophila subsp. hydrophila ATCC 7966
scaffold_2949_2	449	VFG038638	443	1.5e-183	74.7	VFG038638 (fliI) flagellum-specific ATP synthase ND (AI144)	Aeromonas hydrophila subsp. hydrophila ATCC 7966
scaffold_3063_1	237	VFG038674	263	1.3e-77	62.4	VFG038674 (fliR) flagellar biosynthesis protein FliR ND (AI144)	Aeromonas hydrophila subsp. hydrophila ATCC 7966
scaffold_3063_3	260	VFG038666	259	1.2e-97	81.4	VFG038666 (fliP) flagellar biosynthesis protein FliP ND (AI144)	Aeromonas hydrophila subsp. hydrophila ATCC 7966
scaffold_3063_5	146	VFG038658	130	4.2e-42	64.6	VFG038658 (fliN) flagellar motor switch protein FliN ND (AI144)	Aeromonas hydrophila subsp. hydrophila ATCC 7966
scaffold_4154_1	497	VFG038626	560	1.3e-159	60.3	VFG038626 (fliF) flagellar MS-ring protein ND (AI144)	Aeromonas hydrophila subsp. hydrophila ATCC 7966
scaffold_4703_3	166	VFG038694	239	1.4e-49	65.4	VFG038694 (fliA) flagellar biosynthesis sigma factor ND (AI144)	Aeromonas hydrophila subsp. hydrophila ATCC 7966
scaffold_4948_2	124	VFG038698	127	8.4e-60	91.1	VFG038698 (cheY) chemotaxis protein CheY ND (AI144)	Aeromonas hydrophila subsp. hydrophila ATCC 7966
scaffold_6510_2	451	VFG038431	571	2.2e-150	61.3	VFG038431 (tapB) type IV pilus assembly ATPase, PilB-like Tap type IV pili (CVF783)	Aeromonas hydrophila subsp. hydrophila ATCC 7966
scaffold_7371_4	126	VFG038795	444	6.1e-50	76.2	VFG038795 (flgE) flagellar hook protein FlgE ND (AI144)	Aeromonas hydrophila subsp. hydrophila ATCC 7966
scaffold_8230_1	172	VFG038654	356	1.3e-82	86.9	VFG038654 (fliM) flagellar motor switch protein FliM ND (AI144)	Aeromonas hydrophila subsp. hydrophila ATCC 7966
scaffold_11157_2	100	VFG038678	376	8.1e-37	71.1	VFG038678 (flhB) flagellar biosynthetic protein FlhB ND (AI144)	Aeromonas hydrophila subsp. hydrophila ATCC 7966
scaffold_11515_2	247	VFG038674	263	2.0e-81	61.8	VFG038674 (fliR) flagellar biosynthesis protein FliR ND (AI144)	Aeromonas hydrophila subsp. hydrophila ATCC 7966
scaffold_12014_2	200	VFG038463	344	3.2e-93	81.5	VFG038463 (tapT) twitching ATPase Tap type IV pili (CVF783)	Aeromonas hydrophila subsp. hydrophila ATCC 7966
scaffold_14257_1	169	VFG038666	259	8.8e-60	75.2	VFG038666 (fliP) flagellar biosynthesis protein FliP ND (AI144)	Aeromonas hydrophila subsp. hydrophila ATCC 7966
scaffold_15499_2	145	VFG038722	264	2.7e-49	65.2	VFG038722 (AHA_1389) CobQ/CobB/MinD/ParA family protein Polar flagella (CVF786)	Aeromonas hydrophila subsp. hydrophila ATCC 7966
scaffold_15981_2	123	VFG038674	263	7.6e-37	60.7	VFG038674 (fliR) flagellar biosynthesis protein FliR ND (AI144)	Aeromonas hydrophila subsp. hydrophila ATCC 7966
scaffold_16247_1	239	VFG038710	371	5.5e-76	66.5	VFG038710 (cheB-2) chemotaxis-specific methylesterase ND (AI144)	Aeromonas hydrophila subsp. hydrophila ATCC 7966
scaffold_16308_1	190	VFG038835	252	1.4e-69	71.2	VFG038835 (pomA2) chemotaxis protein PomA Polar flagella (CVF786)	Aeromonas hydrophila subsp. hydrophila ATCC 7966
scaffold_21714_2	200	VFG038599	557	6.5e-54	60.7	VFG038599 (mshL) MSHA (mannose-sensitive hemagglutinin) pili biogenesis protein MshL, outer membrane secretin, GspD-like Mannose-sensitive hemagglutinin (Msh) pilus, type IV pili (CVF785)	Aeromonas hydrophila subsp. hydrophila ATCC 7966
scaffold_23014_2	207	VFG038710	371	7.4e-85	74.5	VFG038710 (cheB-2) chemotaxis-specific methylesterase ND (AI144)	Aeromonas hydrophila subsp. hydrophila ATCC 7966
scaffold_25526_1	219	VFG038638	443	6.2e-90	76.9	VFG038638 (fliI) flagellum-specific ATP synthase ND (AI144)	Aeromonas hydrophila subsp. hydrophila ATCC 7966
scaffold_37377_1	65	VFG038654	356	7.4e-15	61.9	VFG038654 (fliM) flagellar motor switch protein FliM ND (AI144)	Aeromonas hydrophila subsp. hydrophila ATCC 7966
scaffold_40617_1	160	VFG038589	569	1.3e-60	70.0	VFG038589 (mshE) ATPase protein MshE, GspE-like Mannose-sensitive hemagglutinin (Msh) pilus, type IV pili (CVF785)	Aeromonas hydrophila subsp. hydrophila ATCC 7966
scaffold_40735_1	160	VFG038638	443	2.3e-70	85.0	VFG038638 (fliI) flagellum-specific ATP synthase ND (AI144)	Aeromonas hydrophila subsp. hydrophila ATCC 7966
scaffold_41071_1	136	VFG038694	239	1.3e-42	72.5	VFG038694 (fliA) flagellar biosynthesis sigma factor ND (AI144)	Aeromonas hydrophila subsp. hydrophila ATCC 7966
scaffold_41472_1	151	VFG038706	728	6.6e-51	73.1	VFG038706 (cheA-2) chemotaxis protein CheA ND (AI144)	Aeromonas hydrophila subsp. hydrophila ATCC 7966
scaffold_41678_1	104	VFG038783	223	1.1e-36	66.3	VFG038783 (flgH) flagellar basal body L-ring protein ND (AI144)	Aeromonas hydrophila subsp. hydrophila ATCC 7966
scaffold_42166_1	122	VFG038779	365	5.8e-45	86.3	VFG038779 (flgI) flagellar basal body P-ring protein ND (AI144)	Aeromonas hydrophila subsp. hydrophila ATCC 7966
scaffold_44554_1	151	VFG038431	571	3.8e-62	78.1	VFG038431 (tapB) type IV pilus assembly ATPase, PilB-like Tap type IV pili (CVF783)	Aeromonas hydrophila subsp. hydrophila ATCC 7966
scaffold_50038_2	43	VFG038815	303	7.0e-14	78.6	VFG038815 (cheV) CheV ND (AI144)	Aeromonas hydrophila subsp. hydrophila ATCC 7966
scaffold_51471_2	78	VFG038807	132	1.8e-23	62.3	VFG038807 (flgB) flagellar basal-body rod protein FlgB ND (AI144)	Aeromonas hydrophila subsp. hydrophila ATCC 7966
scaffold_52010_1	138	VFG038638	443	9.4e-52	70.1	VFG038638 (fliI) flagellum-specific ATP synthase ND (AI144)	Aeromonas hydrophila subsp. hydrophila ATCC 7966
scaffold_53683_1	134	VFG038755	447	3.2e-49	72.2	VFG038755 (fleR/flrC) transcriptional activator ND (AI144)	Aeromonas hydrophila subsp. hydrophila ATCC 7966
scaffold_53975_1	134	VFG038666	259	4.8e-53	81.3	VFG038666 (fliP) flagellar biosynthesis protein FliP ND (AI144)	Aeromonas hydrophila subsp. hydrophila ATCC 7966
scaffold_54351_2	108	VFG038698	127	5.6e-52	90.7	VFG038698 (cheY) chemotaxis protein CheY ND (AI144)	Aeromonas hydrophila subsp. hydrophila ATCC 7966
scaffold_54549_2	68	VFG038463	344	1.8e-27	85.3	VFG038463 (tapT) twitching ATPase Tap type IV pili (CVF783)	Aeromonas hydrophila subsp. hydrophila ATCC 7966
scaffold_54695_1	133	VFG038463	344	2.5e-54	75.9	VFG038463 (tapT) twitching ATPase Tap type IV pili (CVF783)	Aeromonas hydrophila subsp. hydrophila ATCC 7966
scaffold_55638_1	131	VFG038694	239	1.4e-41	65.9	VFG038694 (fliA) flagellar biosynthesis sigma factor ND (AI144)	Aeromonas hydrophila subsp. hydrophila ATCC 7966
scaffold_58328_1	127	VFG038589	569	5.8e-48	70.9	VFG038589 (mshE) ATPase protein MshE, GspE-like Mannose-sensitive hemagglutinin (Msh) pilus, type IV pili (CVF785)	Aeromonas hydrophila subsp. hydrophila ATCC 7966
scaffold_63227_1	121	VFG038654	356	1.2e-58	86.6	VFG038654 (fliM) flagellar motor switch protein FliM ND (AI144)	Aeromonas hydrophila subsp. hydrophila ATCC 7966
scaffold_63391_1	110	VFG038463	344	9.8e-44	77.1	VFG038463 (tapT) twitching ATPase Tap type IV pili (CVF783)	Aeromonas hydrophila subsp. hydrophila ATCC 7966
scaffold_65360_1	118	VFG038850	348	2.4e-32	60.2	VFG038850 (nueB) pseudaminic acid synthase, NeuB Polar flagella (CVF786)	Aeromonas hydrophila subsp. hydrophila ATCC 7966
scaffold_71632_1	110	VFG038690	289	7.5e-44	77.3	VFG038690 (fleN) CobQ/CobB/MinD/ParA family protein ND (AI144)	Aeromonas hydrophila subsp. hydrophila ATCC 7966
scaffold_73578_1	107	VFG038463	344	4.0e-42	77.6	VFG038463 (tapT) twitching ATPase Tap type IV pili (CVF783)	Aeromonas hydrophila subsp. hydrophila ATCC 7966
scaffold_78635_1	63	VFG038463	344	1.5e-20	72.6	VFG038463 (tapT) twitching ATPase Tap type IV pili (CVF783)	Aeromonas hydrophila subsp. hydrophila ATCC 7966
scaffold_80791_1	94	VFG038694	239	3.5e-26	74.3	VFG038694 (fliA) flagellar biosynthesis sigma factor ND (AI144)	Aeromonas hydrophila subsp. hydrophila ATCC 7966
scaffold_81222_1	96	VFG038706	728	7.5e-40	82.3	VFG038706 (cheA-2) chemotaxis protein CheA ND (AI144)	Aeromonas hydrophila subsp. hydrophila ATCC 7966
scaffold_97_35	220	VFG038877	223	5.1e-68	60.8	VFG038877 (lfgH) lateral flagellar L-ring protein, LfgH Lateral flagella (VF0474)	Aeromonas salmonicida subsp. salmonicida A449
scaffold_97_36	365	VFG038878	368	4.7e-127	65.3	VFG038878 (flgI) flagellar basal body P-ring protein Lateral flagella (VF0474)	Aeromonas salmonicida subsp. salmonicida A449
scaffold_134_11	348	VFG038656	356	3.1e-152	79.3	VFG038656 (fliM) flagellar motor switch protein FliM Polar flagella (CVF786)	Aeromonas salmonicida subsp. salmonicida A449
scaffold_134_24	740	VFG038708	722	6.2e-227	66.4	VFG038708 (cheA-2) two-component system chemotaxis sensor histidine kinase CheA Polar flagella (CVF786)	Aeromonas salmonicida subsp. salmonicida A449
scaffold_269_1	123	VFG044246	185	7.1e-43	73.3	VFG044246 (hutZ) heme iron utilization protein direct heme uptake system (IA062)	Aeromonas salmonicida subsp. salmonicida A449
scaffold_269_9	354	VFG044249	343	1.8e-94	61.4	VFG044249 (hutC) ABC-type hemin transporter, permease protein direct heme uptake system (IA062)	Aeromonas salmonicida subsp. salmonicida A449
scaffold_308_2	514	VFG038398	512	8.8e-196	67.0	VFG038398 (vasH) type VI secretion system sigma-54 dependent transcriptional regulator T6SS (CVF782)	Aeromonas salmonicida subsp. salmonicida A449
scaffold_308_4	259	VFG038394	259	3.4e-119	79.9	VFG038394 (ASA_2462) hypothetical protein T6SS (CVF782)	Aeromonas salmonicida subsp. salmonicida A449
scaffold_308_12	161	VFG038379	167	3.3e-72	84.9	VFG038379 (ASA_2470) hypothetical protein T6SS (CVF782)	Aeromonas salmonicida subsp. salmonicida A449
scaffold_377_1	112	VFG038400	201	6.9e-37	64.5	VFG038400 (ASA_2459) hypothetical protein T6SS (CVF782)	Aeromonas salmonicida subsp. salmonicida A449
scaffold_813_1	55	VFG044246	185	1.8e-14	72.3	VFG044246 (hutZ) heme iron utilization protein direct heme uptake system (IA062)	Aeromonas salmonicida subsp. salmonicida A449
scaffold_842_1	439	VFG038902	439	4.3e-143	61.5	VFG038902 (hlyA) hemolysin Hemolysin, HlyA (CVF792)	Aeromonas salmonicida subsp. salmonicida A449
scaffold_1467_1	83	VFG038906	211	6.9e-26	70.4	VFG038906 (ASA_0824) membrane protein Hemolysin III (CVF793)	Aeromonas salmonicida subsp. salmonicida A449
scaffold_2061_1	109	VFG044246	185	4.1e-34	63.6	VFG044246 (hutZ) heme iron utilization protein direct heme uptake system (IA062)	Aeromonas salmonicida subsp. salmonicida A449
scaffold_2061_4	339	VFG044249	343	3.1e-96	60.8	VFG044249 (hutC) ABC-type hemin transporter, permease protein direct heme uptake system (IA062)	Aeromonas salmonicida subsp. salmonicida A449
scaffold_2911_4	78	VFG038628	569	2.7e-16	63.8	VFG038628 (fliF) flagellar MS-ring protein Polar flagella (CVF786)	Aeromonas salmonicida subsp. salmonicida A449
scaffold_3063_6	142	VFG038656	356	4.8e-51	67.1	VFG038656 (fliM) flagellar motor switch protein FliM Polar flagella (CVF786)	Aeromonas salmonicida subsp. salmonicida A449
scaffold_3511_2	701	VFG038684	700	2.3e-295	75.4	VFG038684 (flhA) flagellar biosynthesis protein FlhA Polar flagella (CVF786)	Aeromonas salmonicida subsp. salmonicida A449
scaffold_4154_2	349	VFG038632	353	6.7e-147	76.8	VFG038632 (fliG) flagellar motor switch protein G Polar flagella (CVF786)	Aeromonas salmonicida subsp. salmonicida A449
scaffold_4952_1	137	VFG038781	375	1.3e-53	76.5	VFG038781 (flgI) flagellar basal body P-ring protein Polar flagella (CVF786)	Aeromonas salmonicida subsp. salmonicida A449
scaffold_5029_2	248	VFG038793	248	1.0e-93	71.7	VFG038793 (flgF) flagellar basal body rod protein FlgF Polar flagella (CVF786)	Aeromonas salmonicida subsp. salmonicida A449
scaffold_5070_3	140	VFG038906	211	5.6e-44	65.7	VFG038906 (ASA_0824) membrane protein Hemolysin III (CVF793)	Aeromonas salmonicida subsp. salmonicida A449
scaffold_7371_1	54	VFG038809	132	4.0e-14	64.7	VFG038809 (flgB) flagellar basal body protein FlgB Polar flagella (CVF786)	Aeromonas salmonicida subsp. salmonicida A449
scaffold_10688_1	417	VFG038684	700	1.1e-164	70.0	VFG038684 (flhA) flagellar biosynthesis protein FlhA Polar flagella (CVF786)	Aeromonas salmonicida subsp. salmonicida A449
scaffold_11653_1	248	VFG038793	248	1.5e-92	70.0	VFG038793 (flgF) flagellar basal body rod protein FlgF Polar flagella (CVF786)	Aeromonas salmonicida subsp. salmonicida A449
scaffold_12753_2	217	VFG038465	344	4.0e-97	81.3	VFG038465 (tapT) type IV pilus protein TapT Tap pili (AI103)	Aeromonas salmonicida subsp. salmonicida A449
scaffold_12905_1	165	VFG038469	369	5.4e-62	73.2	VFG038469 (tapU) type IV pilus protein TapU Tap pili (AI103)	Aeromonas salmonicida subsp. salmonicida A449
scaffold_14551_2	209	VFG038878	368	2.6e-61	60.5	VFG038878 (flgI) flagellar basal body P-ring protein Lateral flagella (VF0474)	Aeromonas salmonicida subsp. salmonicida A449
scaffold_14926_2	71	VFG044246	185	4.0e-22	69.0	VFG044246 (hutZ) heme iron utilization protein direct heme uptake system (IA062)	Aeromonas salmonicida subsp. salmonicida A449
scaffold_18419_1	278	VFG038861	691	1.9e-91	63.6	VFG038861 (lfhA) lateral flagellar biosynthesis protein Lateral flagella (VF0474)	Aeromonas salmonicida subsp. salmonicida A449
scaffold_18757_1	273	VFG038817	303	1.7e-105	70.2	VFG038817 (cheV) two-component system chemotaxis response regulator CheV Polar flagella (CVF786)	Aeromonas salmonicida subsp. salmonicida A449
scaffold_20334_1	246	VFG038861	691	3.2e-103	81.7	VFG038861 (lfhA) lateral flagellar biosynthesis protein Lateral flagella (VF0474)	Aeromonas salmonicida subsp. salmonicida A449
scaffold_21958_1	231	VFG038865	342	2.0e-70	60.1	VFG038865 (fliG) flagellar motor switch protein G Lateral flagella (VF0474)	Aeromonas salmonicida subsp. salmonicida A449
scaffold_22183_2	142	VFG038857	244	4.1e-50	70.0	VFG038857 (fliP) flagellar biosynthesis protein FliP Lateral flagella (VF0474)	Aeromonas salmonicida subsp. salmonicida A449
scaffold_22377_1	192	VFG038861	691	9.3e-58	62.4	VFG038861 (lfhA) lateral flagellar biosynthesis protein Lateral flagella (VF0474)	Aeromonas salmonicida subsp. salmonicida A449
scaffold_23021_1	46	VFG038872	129	2.4e-12	72.7	VFG038872 (lfgB) lateral flagellar basal body protein, LfgB Lateral flagella (VF0474)	Aeromonas salmonicida subsp. salmonicida A449
scaffold_23652_2	179	VFG038878	368	6.0e-67	75.3	VFG038878 (flgI) flagellar basal body P-ring protein Lateral flagella (VF0474)	Aeromonas salmonicida subsp. salmonicida A449
scaffold_25998_1	53	VFG038502	712	1.3e-12	66.7	VFG038502 (tapV) type IV pilus assembly protein TapV Tap pili (AI103)	Aeromonas salmonicida subsp. salmonicida A449
scaffold_26656_1	46	VFG038876	261	5.9e-19	91.3	VFG038876 (lfgG) lateral flagellar basal-body rod protein LfgG Lateral flagella (VF0474)	Aeromonas salmonicida subsp. salmonicida A449
scaffold_33926_2	64	VFG038632	353	4.4e-20	66.7	VFG038632 (fliG) flagellar motor switch protein G Polar flagella (CVF786)	Aeromonas salmonicida subsp. salmonicida A449
scaffold_34034_1	173	VFG038628	569	4.9e-50	62.8	VFG038628 (fliF) flagellar MS-ring protein Polar flagella (CVF786)	Aeromonas salmonicida subsp. salmonicida A449
scaffold_37377_2	104	VFG038660	121	5.3e-23	61.1	VFG038660 (fliN) polar flagellar switch protein FliN Polar flagella (CVF786)	Aeromonas salmonicida subsp. salmonicida A449
scaffold_38394_1	146	VFG038793	248	5.1e-48	66.9	VFG038793 (flgF) flagellar basal body rod protein FlgF Polar flagella (CVF786)	Aeromonas salmonicida subsp. salmonicida A449
scaffold_41448_1	159	VFG038817	303	8.8e-54	66.7	VFG038817 (cheV) two-component system chemotaxis response regulator CheV Polar flagella (CVF786)	Aeromonas salmonicida subsp. salmonicida A449
scaffold_48224_1	144	VFG038862	458	1.3e-51	71.8	VFG038862 (lafK) two-component system lateral flagellar response regulator Lateral flagella (VF0474)	Aeromonas salmonicida subsp. salmonicida A449
scaffold_49013_1	84	VFG038781	375	2.6e-28	73.5	VFG038781 (flgI) flagellar basal body P-ring protein Polar flagella (CVF786)	Aeromonas salmonicida subsp. salmonicida A449
scaffold_49257_2	49	VFG044246	185	2.6e-12	68.2	VFG044246 (hutZ) heme iron utilization protein direct heme uptake system (IA062)	Aeromonas salmonicida subsp. salmonicida A449
scaffold_51505_1	139	VFG044249	343	2.0e-41	66.9	VFG044249 (hutC) ABC-type hemin transporter, permease protein direct heme uptake system (IA062)	Aeromonas salmonicida subsp. salmonicida A449
scaffold_51700_1	138	VFG038620	217	5.7e-41	60.6	VFG038620 (motX) sodium-type flagellar motor component Polar flagella (CVF786)	Aeromonas salmonicida subsp. salmonicida A449
scaffold_52646_1	136	VFG038632	353	4.0e-55	80.1	VFG038632 (fliG) flagellar motor switch protein G Polar flagella (CVF786)	Aeromonas salmonicida subsp. salmonicida A449
scaffold_54277_2	110	VFG044249	343	1.7e-24	65.2	VFG044249 (hutC) ABC-type hemin transporter, permease protein direct heme uptake system (IA062)	Aeromonas salmonicida subsp. salmonicida A449
scaffold_55013_1	132	VFG038877	223	2.1e-48	68.9	VFG038877 (lfgH) lateral flagellar L-ring protein, LfgH Lateral flagella (VF0474)	Aeromonas salmonicida subsp. salmonicida A449
scaffold_56320_1	112	VFG038632	353	2.9e-43	74.8	VFG038632 (fliG) flagellar motor switch protein G Polar flagella (CVF786)	Aeromonas salmonicida subsp. salmonicida A449
scaffold_57318_1	129	VFG038761	344	1.2e-29	61.7	VFG038761 (flrB) two-component system flagellar sensor histidine kinase FlrB Polar flagella (CVF786)	Aeromonas salmonicida subsp. salmonicida A449
scaffold_57916_1	129	VFG038656	356	3.2e-54	76.0	VFG038656 (fliM) flagellar motor switch protein FliM Polar flagella (CVF786)	Aeromonas salmonicida subsp. salmonicida A449
scaffold_59803_1	126	VFG038632	353	7.0e-54	81.7	VFG038632 (fliG) flagellar motor switch protein G Polar flagella (CVF786)	Aeromonas salmonicida subsp. salmonicida A449
scaffold_64013_1	120	VFG038789	262	6.5e-41	67.8	VFG038789 (flgG) flagellar basal body rod protein FlgG Polar flagella (CVF786)	Aeromonas salmonicida subsp. salmonicida A449
scaffold_67836_1	114	VFG038878	368	2.2e-46	80.7	VFG038878 (flgI) flagellar basal body P-ring protein Lateral flagella (VF0474)	Aeromonas salmonicida subsp. salmonicida A449
scaffold_69167_1	113	VFG038902	439	1.0e-35	63.1	VFG038902 (hlyA) hemolysin Hemolysin, HlyA (CVF792)	Aeromonas salmonicida subsp. salmonicida A449
scaffold_71851_1	110	VFG038861	691	3.4e-36	72.9	VFG038861 (lfhA) lateral flagellar biosynthesis protein Lateral flagella (VF0474)	Aeromonas salmonicida subsp. salmonicida A449
scaffold_72867_1	81	VFG038902	439	1.2e-22	70.4	VFG038902 (hlyA) hemolysin Hemolysin, HlyA (CVF792)	Aeromonas salmonicida subsp. salmonicida A449
scaffold_72974_1	44	VFG038873	141	1.5e-11	71.4	VFG038873 (flgC) flagellar basal body rod protein FlgC Lateral flagella (VF0474)	Aeromonas salmonicida subsp. salmonicida A449
scaffold_73322_1	108	VFG038632	353	2.2e-40	75.9	VFG038632 (fliG) flagellar motor switch protein G Polar flagella (CVF786)	Aeromonas salmonicida subsp. salmonicida A449
scaffold_73640_1	107	VFG044249	343	2.5e-36	76.9	VFG044249 (hutC) ABC-type hemin transporter, permease protein direct heme uptake system (IA062)	Aeromonas salmonicida subsp. salmonicida A449
scaffold_75118_1	105	VFG038781	375	1.5e-41	77.9	VFG038781 (flgI) flagellar basal body P-ring protein Polar flagella (CVF786)	Aeromonas salmonicida subsp. salmonicida A449
scaffold_76384_1	87	VFG038860	378	2.2e-22	60.0	VFG038860 (lfhB) lateral flagellar biosynthetic protein, LfhB Lateral flagella (VF0474)	Aeromonas salmonicida subsp. salmonicida A449
scaffold_77153_1	87	VFG038888	235	4.9e-14	60.0	VFG038888 (lafS) LafS, RNA polymerase sigma factor Lateral flagella (VF0474)	Aeromonas salmonicida subsp. salmonicida A449
scaffold_78855_1	99	VFG038876	261	2.4e-33	62.6	VFG038876 (lfgG) lateral flagellar basal-body rod protein LfgG Lateral flagella (VF0474)	Aeromonas salmonicida subsp. salmonicida A449
scaffold_134_22	128	VFG038701	127	1.6e-61	92.1	VFG038701 (cheY) response regulator containing CheY-like receiver, AAA-type ATPase, and DNA-binding domains Polar flagella (CVF786)	Aeromonas veronii B565
scaffold_1356_1	476	VFG038709	730	2.6e-173	79.4	VFG038709 (cheA-2) transducing histidine kinase Polar flagella (CVF786)	Aeromonas veronii B565
scaffold_1635_2	314	VFG038818	303	2.6e-126	74.9	VFG038818 (cheV) chemotaxis protein methyltransferase CheV Polar flagella (CVF786)	Aeromonas veronii B565
scaffold_2617_3	350	VFG038470	370	8.8e-139	73.8	VFG038470 (tapU) Twitching motility protein PilU Tap type IV pili (CVF783)	Aeromonas veronii B565
scaffold_2835_1	138	VFG038798	450	1.3e-53	74.3	VFG038798 (flgE) flagellar hook protein FlgE Polar flagella (CVF786)	Aeromonas veronii B565
scaffold_2835_3	140	VFG038806	139	1.6e-54	76.8	VFG038806 (flgC) flagellar basal-body rod protein FlgC Polar flagella (CVF786)	Aeromonas veronii B565
scaffold_2835_5	274	VFG038814	274	1.7e-113	70.4	VFG038814 (cheR-3) CheR methyltransferase Polar flagella (CVF786)	Aeromonas veronii B565
scaffold_3063_2	90	VFG038673	89	1.4e-32	75.3	VFG038673 (fliQ) flagellar biosynthetic protein FliQ Polar flagella (CVF786)	Aeromonas veronii B565
scaffold_4703_2	295	VFG038693	291	3.8e-119	72.4	VFG038693 (flhG) CobQ/CobB/MinD/ParA family protein Polar flagella (CVF786)	Aeromonas veronii B565
scaffold_4948_1	73	VFG038697	225	3.3e-24	74.3	VFG038697 (fliA) RNA polymerase sigma factor Polar flagella (CVF786)	Aeromonas veronii B565
scaffold_4948_3	250	VFG038705	246	6.4e-83	64.7	VFG038705 (cheZ) chemotaxis protein CheZ Polar flagella (CVF786)	Aeromonas veronii B565
scaffold_5029_3	86	VFG038790	262	4.1e-37	88.4	VFG038790 (flgG) flagellar basal body rod protein FlgG Polar flagella (CVF786)	Aeromonas veronii B565
scaffold_7371_2	140	VFG038806	139	3.0e-53	75.4	VFG038806 (flgC) flagellar basal-body rod protein FlgC Polar flagella (CVF786)	Aeromonas veronii B565
scaffold_11157_1	265	VFG038685	700	5.5e-109	81.9	VFG038685 (flhA) flagellar biosynthesis protein FlhA Polar flagella (CVF786)	Aeromonas veronii B565
scaffold_11653_2	116	VFG038790	262	3.9e-51	82.8	VFG038790 (flgG) flagellar basal body rod protein FlgG Polar flagella (CVF786)	Aeromonas veronii B565
scaffold_11998_3	70	VFG038713	371	9.3e-24	76.1	VFG038713 (cheB-2) two component system response-regulator/protein-glutamate methylesterase CheB Polar flagella (CVF786)	Aeromonas veronii B565
scaffold_13032_1	60	VFG038705	246	1.3e-13	65.0	VFG038705 (cheZ) chemotaxis protein CheZ Polar flagella (CVF786)	Aeromonas veronii B565
scaffold_13032_2	124	VFG038701	127	1.2e-58	90.2	VFG038701 (cheY) response regulator containing CheY-like receiver, AAA-type ATPase, and DNA-binding domains Polar flagella (CVF786)	Aeromonas veronii B565
scaffold_13174_2	138	VFG038798	450	5.9e-54	75.0	VFG038798 (flgE) flagellar hook protein FlgE Polar flagella (CVF786)	Aeromonas veronii B565
scaffold_14021_1	194	VFG038798	450	3.2e-50	64.1	VFG038798 (flgE) flagellar hook protein FlgE Polar flagella (CVF786)	Aeromonas veronii B565
scaffold_15256_2	221	VFG038466	344	1.0e-100	81.0	VFG038466 (tapT) Pilus retraction ATPase PilT Tap type IV pili (CVF783)	Aeromonas veronii B565
scaffold_16247_2	58	VFG038709	730	5.5e-22	83.9	VFG038709 (cheA-2) transducing histidine kinase Polar flagella (CVF786)	Aeromonas veronii B565
scaffold_19673_1	246	VFG038782	365	2.1e-102	80.1	VFG038782 (flgI) flagellar P-ring protein FlgI Polar flagella (CVF786)	Aeromonas veronii B565
scaffold_21779_1	245	VFG038470	370	4.8e-107	76.2	VFG038470 (tapU) Twitching motility protein PilU Tap type IV pili (CVF783)	Aeromonas veronii B565
scaffold_22809_1	164	VFG038725	264	8.5e-60	69.5	VFG038725 (B565_1123) CobQ/CobB/MinD/ParA family protein Polar flagella (CVF786)	Aeromonas veronii B565
scaffold_24850_1	79	VFG038903	439	3.5e-27	70.5	VFG038903 (hlyA) putative transporter Hemolysin, HlyA (CVF792)	Aeromonas veronii B565
scaffold_28490_1	203	VFG038629	569	6.4e-65	61.9	VFG038629 (fliF) flagellar M-ring protein FliF Polar flagella (CVF786)	Aeromonas veronii B565
scaffold_29432_1	142	VFG038782	365	8.7e-53	82.0	VFG038782 (flgI) flagellar P-ring protein FlgI Polar flagella (CVF786)	Aeromonas veronii B565
scaffold_37620_2	90	VFG038673	89	5.4e-32	74.2	VFG038673 (fliQ) flagellar biosynthetic protein FliQ Polar flagella (CVF786)	Aeromonas veronii B565
scaffold_39487_1	162	VFG038466	344	2.8e-71	83.8	VFG038466 (tapT) Pilus retraction ATPase PilT Tap type IV pili (CVF783)	Aeromonas veronii B565
scaffold_39719_1	105	VFG038798	450	3.4e-38	74.0	VFG038798 (flgE) flagellar hook protein FlgE Polar flagella (CVF786)	Aeromonas veronii B565
scaffold_40682_1	160	VFG038766	473	9.5e-64	79.5	VFG038766 (flrA) FleQ protein Polar flagella (CVF786)	Aeromonas veronii B565
scaffold_41427_1	158	VFG038693	291	4.3e-69	81.6	VFG038693 (flhG) CobQ/CobB/MinD/ParA family protein Polar flagella (CVF786)	Aeromonas veronii B565
scaffold_41871_1	126	VFG038903	439	2.0e-40	70.1	VFG038903 (hlyA) putative transporter Hemolysin, HlyA (CVF792)	Aeromonas veronii B565
scaffold_43685_1	153	VFG038790	262	2.5e-61	71.9	VFG038790 (flgG) flagellar basal body rod protein FlgG Polar flagella (CVF786)	Aeromonas veronii B565
scaffold_45090_1	150	VFG038591	569	3.0e-51	66.7	VFG038591 (mshE) type IV pilin Mannose-sensitive hemagglutinin (Msh) pilus, type IV pili (CVF785)	Aeromonas veronii B565
scaffold_45182_1	150	VFG038602	557	2.4e-45	60.7	VFG038602 (mshL) MSHA biogenesis protein MshL Mannose-sensitive hemagglutinin (Msh) pilus, type IV pili (CVF785)	Aeromonas veronii B565
scaffold_45958_1	123	VFG038709	730	4.4e-45	72.1	VFG038709 (cheA-2) transducing histidine kinase Polar flagella (CVF786)	Aeromonas veronii B565
scaffold_46416_1	148	VFG038814	274	5.7e-55	69.6	VFG038814 (cheR-3) CheR methyltransferase Polar flagella (CVF786)	Aeromonas veronii B565
scaffold_48286_1	144	VFG038709	730	7.7e-65	81.3	VFG038709 (cheA-2) transducing histidine kinase Polar flagella (CVF786)	Aeromonas veronii B565
scaffold_48383_1	144	VFG038462	741	2.0e-44	69.7	VFG038462 (tapQ) type IV pilus secretin PilQ Tap type IV pili (CVF783)	Aeromonas veronii B565
scaffold_48541_1	144	VFG038814	274	4.2e-55	70.1	VFG038814 (cheR-3) CheR methyltransferase Polar flagella (CVF786)	Aeromonas veronii B565
scaffold_50038_1	92	VFG038814	274	5.5e-32	67.4	VFG038814 (cheR-3) CheR methyltransferase Polar flagella (CVF786)	Aeromonas veronii B565
scaffold_53953_1	134	VFG038903	439	1.1e-44	62.9	VFG038903 (hlyA) putative transporter Hemolysin, HlyA (CVF792)	Aeromonas veronii B565
scaffold_54091_1	134	VFG038766	473	2.5e-57	81.2	VFG038766 (flrA) FleQ protein Polar flagella (CVF786)	Aeromonas veronii B565
scaffold_54721_1	133	VFG038279	501	1.7e-50	72.9	VFG038279 (exeE) type II secretory pathway, ATPase PulE-like protein T2SS (CVF780)	Aeromonas veronii B565
scaffold_56273_1	131	VFG038633	353	4.3e-54	81.7	VFG038633 (fliG) flagellar motor switch protein FliG Polar flagella (CVF786)	Aeromonas veronii B565
scaffold_64653_1	119	VFG038790	262	4.7e-44	66.1	VFG038790 (flgG) flagellar basal body rod protein FlgG Polar flagella (CVF786)	Aeromonas veronii B565
scaffold_64812_1	118	VFG038629	569	2.6e-42	72.0	VFG038629 (fliF) flagellar M-ring protein FliF Polar flagella (CVF786)	Aeromonas veronii B565
scaffold_65119_1	118	VFG038693	291	1.0e-46	78.0	VFG038693 (flhG) CobQ/CobB/MinD/ParA family protein Polar flagella (CVF786)	Aeromonas veronii B565
scaffold_65239_1	118	VFG038470	370	3.4e-42	69.6	VFG038470 (tapU) Twitching motility protein PilU Tap type IV pili (CVF783)	Aeromonas veronii B565
scaffold_66383_1	116	VFG038657	356	1.6e-52	87.2	VFG038657 (fliM) flagellar motor switch protein FliM Polar flagella (CVF786)	Aeromonas veronii B565
scaffold_66773_1	116	VFG038470	370	1.6e-49	81.0	VFG038470 (tapU) Twitching motility protein PilU Tap type IV pili (CVF783)	Aeromonas veronii B565
scaffold_70814_1	111	VFG038834	283	9.9e-36	62.4	VFG038834 (pomB2) sodium-driven polar flagellar protein Polar flagella (CVF786)	Aeromonas veronii B565
scaffold_71804_1	110	VFG038466	344	5.7e-44	75.2	VFG038466 (tapT) Pilus retraction ATPase PilT Tap type IV pili (CVF783)	Aeromonas veronii B565
scaffold_80036_1	98	VFG038677	265	3.9e-28	63.8	VFG038677 (fliR) flagellar biosynthetic protein fliR Polar flagella (CVF786)	Aeromonas veronii B565
scaffold_81208_1	90	VFG038470	370	2.6e-26	68.2	VFG038470 (tapU) Twitching motility protein PilU Tap type IV pili (CVF783)	Aeromonas veronii B565
scaffold_81217_1	96	VFG038657	356	2.6e-40	84.5	VFG038657 (fliM) flagellar motor switch protein FliM Polar flagella (CVF786)	Aeromonas veronii B565
scaffold_81777_1	77	VFG038697	225	4.2e-33	86.8	VFG038697 (fliA) RNA polymerase sigma factor Polar flagella (CVF786)	Aeromonas veronii B565
scaffold_33857_1	181	VFG042809	426	5.2e-58	60.8	VFG042809 (tadA) TadA fimbrial low-molecular-weight protein (Flp) pili (AI104)	Aggregatibacter actinomycetemcomitans str. CU1000
scaffold_71171_1	110	VFG000681(gb|AAF13662)	149	2.1e-38	72.5	VFG000681(gb|AAF13662) (capC) CapC, involved in Poly-gamma-glutamate synthesis Capsule (VF0141)	Bacillus anthracis
scaffold_4510_4	322	VFG044214	327	2.6e-105	63.2	VFG044214 (isdE2) iron compound ABC transporter permease protein NEAT-type hemophore-mediated heme uptake system (IA039)	Bacillus anthracis str. Ames Ancestor
scaffold_4510_5	226	VFG044213	256	1.4e-76	61.9	VFG044213 (isdF) iron compound ABC transporter ATP-binding protein NEAT-type hemophore-mediated heme uptake system (IA039)	Bacillus anthracis str. Ames Ancestor
scaffold_32925_1	150	VFG044215	291	8.9e-48	60.5	VFG044215 (isdE2) iron compound ABC transporter iron compound-binding protein NEAT-type hemophore-mediated heme uptake system (IA039)	Bacillus anthracis str. Ames Ancestor
scaffold_44813_1	151	VFG044214	327	3.2e-45	62.9	VFG044214 (isdE2) iron compound ABC transporter permease protein NEAT-type hemophore-mediated heme uptake system (IA039)	Bacillus anthracis str. Ames Ancestor
scaffold_67550_1	115	VFG044219	250	1.2e-41	69.9	VFG044219 (fhuC) iron compound ABC transporter ATP-binding protein petrobactin (IA028)	Bacillus anthracis str. Ames Ancestor
scaffold_373_22	72	VFG016308	330	4.2e-19	60.6	VFG016308 (galE) UDP-glucose 4-epimerase Polysaccharide capsule (CVF567)	Bacillus cereus ATCC 10987
scaffold_917_2	338	VFG016387	338	1.0e-128	66.3	VFG016387 (galE) UDP-glucose 4-epimerase Polysaccharide capsule (CVF567)	Bacillus cereus ATCC 10987
scaffold_1488_1	126	VFG016387	338	6.6e-36	61.9	VFG016387 (galE) UDP-glucose 4-epimerase Polysaccharide capsule (CVF567)	Bacillus cereus ATCC 10987
scaffold_2315_1	208	VFG016387	338	8.5e-81	66.2	VFG016387 (galE) UDP-glucose 4-epimerase Polysaccharide capsule (CVF567)	Bacillus cereus ATCC 10987
scaffold_3479_1	339	VFG016387	338	2.0e-124	60.4	VFG016387 (galE) UDP-glucose 4-epimerase Polysaccharide capsule (CVF567)	Bacillus cereus ATCC 10987
scaffold_3608_4	388	VFG016400	371	2.3e-135	61.4	VFG016400 (BCE_5394) aminotransferase family protein Polysaccharide capsule (CVF567)	Bacillus cereus ATCC 10987
scaffold_3840_2	379	VFG016400	371	3.9e-132	62.5	VFG016400 (BCE_5394) aminotransferase family protein Polysaccharide capsule (CVF567)	Bacillus cereus ATCC 10987
scaffold_5499_1	338	VFG016387	338	7.2e-130	64.2	VFG016387 (galE) UDP-glucose 4-epimerase Polysaccharide capsule (CVF567)	Bacillus cereus ATCC 10987
scaffold_5932_2	278	VFG016387	338	1.9e-99	64.4	VFG016387 (galE) UDP-glucose 4-epimerase Polysaccharide capsule (CVF567)	Bacillus cereus ATCC 10987
scaffold_6502_1	160	VFG016402	293	1.4e-59	70.4	VFG016402 (galU) UTP-glucose-1-phosphate uridylyltransferase Polysaccharide capsule (CVF567)	Bacillus cereus ATCC 10987
scaffold_7691_1	338	VFG016387	338	4.8e-134	65.7	VFG016387 (galE) UDP-glucose 4-epimerase Polysaccharide capsule (CVF567)	Bacillus cereus ATCC 10987
scaffold_9516_1	285	VFG016387	338	2.2e-111	66.9	VFG016387 (galE) UDP-glucose 4-epimerase Polysaccharide capsule (CVF567)	Bacillus cereus ATCC 10987
scaffold_10296_1	198	VFG016387	338	1.8e-80	67.2	VFG016387 (galE) UDP-glucose 4-epimerase Polysaccharide capsule (CVF567)	Bacillus cereus ATCC 10987
scaffold_11771_1	313	VFG016387	338	3.7e-112	64.5	VFG016387 (galE) UDP-glucose 4-epimerase Polysaccharide capsule (CVF567)	Bacillus cereus ATCC 10987
scaffold_13325_2	278	VFG016400	371	4.7e-127	75.8	VFG016400 (BCE_5394) aminotransferase family protein Polysaccharide capsule (CVF567)	Bacillus cereus ATCC 10987
scaffold_13346_1	351	VFG016400	371	1.2e-127	66.8	VFG016400 (BCE_5394) aminotransferase family protein Polysaccharide capsule (CVF567)	Bacillus cereus ATCC 10987
scaffold_14627_1	181	VFG016400	371	3.2e-76	76.8	VFG016400 (BCE_5394) aminotransferase family protein Polysaccharide capsule (CVF567)	Bacillus cereus ATCC 10987
scaffold_17106_1	280	VFG016387	338	1.2e-98	63.1	VFG016387 (galE) UDP-glucose 4-epimerase Polysaccharide capsule (CVF567)	Bacillus cereus ATCC 10987
scaffold_17479_3	56	VFG043437	261	9.5e-11	62.2	VFG043437 (motB) flagellar motor protein MotB peritrichous flagella (AI153)	Bacillus cereus ATCC 10987
scaffold_19856_2	218	VFG016387	338	6.8e-73	60.7	VFG016387 (galE) UDP-glucose 4-epimerase Polysaccharide capsule (CVF567)	Bacillus cereus ATCC 10987
scaffold_21429_1	238	VFG016391	457	3.2e-92	69.2	VFG016391 (ugd) UDP-glucose 6-dehydrogenase Polysaccharide capsule (CVF567)	Bacillus cereus ATCC 10987
scaffold_21911_1	170	VFG016400	371	6.3e-74	73.2	VFG016400 (BCE_5394) aminotransferase family protein Polysaccharide capsule (CVF567)	Bacillus cereus ATCC 10987
scaffold_31339_1	191	VFG016402	293	4.3e-63	60.0	VFG016402 (galU) UTP-glucose-1-phosphate uridylyltransferase Polysaccharide capsule (CVF567)	Bacillus cereus ATCC 10987
scaffold_41261_1	159	VFG016387	338	1.6e-50	61.4	VFG016387 (galE) UDP-glucose 4-epimerase Polysaccharide capsule (CVF567)	Bacillus cereus ATCC 10987
scaffold_44989_1	151	VFG016400	371	5.4e-53	63.3	VFG016400 (BCE_5394) aminotransferase family protein Polysaccharide capsule (CVF567)	Bacillus cereus ATCC 10987
scaffold_48324_2	54	VFG016387	338	1.4e-14	65.2	VFG016387 (galE) UDP-glucose 4-epimerase Polysaccharide capsule (CVF567)	Bacillus cereus ATCC 10987
scaffold_49326_1	143	VFG016387	338	4.7e-46	60.1	VFG016387 (galE) UDP-glucose 4-epimerase Polysaccharide capsule (CVF567)	Bacillus cereus ATCC 10987
scaffold_51313_1	97	VFG016400	371	7.1e-38	77.3	VFG016400 (BCE_5394) aminotransferase family protein Polysaccharide capsule (CVF567)	Bacillus cereus ATCC 10987
scaffold_55242_1	132	VFG016402	293	2.8e-45	65.2	VFG016402 (galU) UTP-glucose-1-phosphate uridylyltransferase Polysaccharide capsule (CVF567)	Bacillus cereus ATCC 10987
scaffold_55916_1	42	VFG016308	330	5.4e-11	65.0	VFG016308 (galE) UDP-glucose 4-epimerase Polysaccharide capsule (CVF567)	Bacillus cereus ATCC 10987
scaffold_56012_1	59	VFG043408	122	3.0e-15	62.5	VFG043408 (cheY) chemotaxis response regulator peritrichous flagella (AI153)	Bacillus cereus ATCC 10987
scaffold_64084_1	120	VFG016387	338	5.7e-37	62.1	VFG016387 (galE) UDP-glucose 4-epimerase Polysaccharide capsule (CVF567)	Bacillus cereus ATCC 10987
scaffold_66114_1	117	VFG016387	338	8.0e-44	69.2	VFG016387 (galE) UDP-glucose 4-epimerase Polysaccharide capsule (CVF567)	Bacillus cereus ATCC 10987
scaffold_68198_1	115	VFG016402	293	2.3e-35	61.7	VFG016402 (galU) UTP-glucose-1-phosphate uridylyltransferase Polysaccharide capsule (CVF567)	Bacillus cereus ATCC 10987
scaffold_69952_1	112	VFG016389	302	5.3e-37	64.2	VFG016389 (lytR) membrane-bound transcriptional regulator LytR Polysaccharide capsule (CVF567)	Bacillus cereus ATCC 10987
scaffold_77106_1	55	VFG016387	338	1.8e-14	61.5	VFG016387 (galE) UDP-glucose 4-epimerase Polysaccharide capsule (CVF567)	Bacillus cereus ATCC 10987
scaffold_78561_1	100	VFG016387	338	3.9e-39	70.7	VFG016387 (galE) UDP-glucose 4-epimerase Polysaccharide capsule (CVF567)	Bacillus cereus ATCC 10987
scaffold_11_16	330	VFG016307	330	1.1e-117	62.6	VFG016307 (BC5263) UDP-glucose 4-epimerase Polysaccharide capsule (CVF567)	Bacillus cereus ATCC 14579
scaffold_264_1	182	VFG016382	293	2.8e-56	61.3	VFG016382 (BC5275) UTP--glucose-1-phosphate uridylyltransferase Polysaccharide capsule (CVF567)	Bacillus cereus ATCC 14579
scaffold_2733_3	290	VFG016382	293	5.5e-102	62.4	VFG016382 (BC5275) UTP--glucose-1-phosphate uridylyltransferase Polysaccharide capsule (CVF567)	Bacillus cereus ATCC 14579
scaffold_10252_1	151	VFG016380	405	2.4e-53	67.6	VFG016380 (BC5273) UDP-bacillosamine synthetase Polysaccharide capsule (CVF567)	Bacillus cereus ATCC 14579
scaffold_13931_1	173	VFG016307	330	1.9e-62	63.9	VFG016307 (BC5263) UDP-glucose 4-epimerase Polysaccharide capsule (CVF567)	Bacillus cereus ATCC 14579
scaffold_15799_1	297	VFG016307	330	1.8e-108	62.2	VFG016307 (BC5263) UDP-glucose 4-epimerase Polysaccharide capsule (CVF567)	Bacillus cereus ATCC 14579
scaffold_17626_2	160	VFG016382	293	1.1e-59	70.4	VFG016382 (BC5275) UTP--glucose-1-phosphate uridylyltransferase Polysaccharide capsule (CVF567)	Bacillus cereus ATCC 14579
scaffold_25649_2	131	VFG016307	330	1.6e-40	64.8	VFG016307 (BC5263) UDP-glucose 4-epimerase Polysaccharide capsule (CVF567)	Bacillus cereus ATCC 14579
scaffold_29451_1	198	VFG016307	330	9.3e-69	62.4	VFG016307 (BC5263) UDP-glucose 4-epimerase Polysaccharide capsule (CVF567)	Bacillus cereus ATCC 14579
scaffold_38428_1	155	VFG016307	330	2.1e-52	61.4	VFG016307 (BC5263) UDP-glucose 4-epimerase Polysaccharide capsule (CVF567)	Bacillus cereus ATCC 14579
scaffold_51604_1	138	VFG016381	593	1.9e-57	78.3	VFG016381 (BC5274) UDP-N-acetylglucosamine 4,6-dehydratase Polysaccharide capsule (CVF567)	Bacillus cereus ATCC 14579
scaffold_54714_1	91	VFG016307	330	1.7e-25	61.6	VFG016307 (BC5263) UDP-glucose 4-epimerase Polysaccharide capsule (CVF567)	Bacillus cereus ATCC 14579
scaffold_69519_1	112	VFG016382	293	6.3e-38	70.4	VFG016382 (BC5275) UTP--glucose-1-phosphate uridylyltransferase Polysaccharide capsule (CVF567)	Bacillus cereus ATCC 14579
scaffold_73039_1	107	VFG016381	593	2.8e-43	79.4	VFG016381 (BC5274) UDP-N-acetylglucosamine 4,6-dehydratase Polysaccharide capsule (CVF567)	Bacillus cereus ATCC 14579
scaffold_80022_1	98	VFG016372	304	6.9e-33	65.3	VFG016372 (BC5265) membrane-bound transcriptional regulator LytR Polysaccharide capsule (CVF567)	Bacillus cereus ATCC 14579
scaffold_80871_1	97	VFG016217	512	2.9e-39	77.3	VFG016217 (BC5101) Perfringolysin O precursor Anthrolysin O (CVF558)	Bacillus cereus ATCC 14579
scaffold_39388_1	127	VFG016238	216	8.6e-44	64.0	VFG016238 (hlyIII) hemolysin Hemolysin III (CVF560)	Bacillus clausii KSM-K16
scaffold_13385_2	215	VFG016237	215	4.5e-77	61.7	VFG016237 (hlyIII) hemolysin III Hemolysin III (CVF560)	Bacillus halodurans C-125
scaffold_22648_1	60	VFG016234	213	8.3e-13	73.1	VFG016234 (hlyIII) hypothetical protein Hemolysin III (CVF560)	Bacillus subtilis subsp. subtilis str. 168
scaffold_1140_9	329	VFG016309	330	2.1e-118	61.9	VFG016309 (galE) UDP-glucose 4-epimerase Polysaccharide capsule (CVF567)	Bacillus thuringiensis serovar konkukian str. 97-27
scaffold_1228_5	329	VFG016309	330	2.1e-118	62.2	VFG016309 (galE) UDP-glucose 4-epimerase Polysaccharide capsule (CVF567)	Bacillus thuringiensis serovar konkukian str. 97-27
scaffold_34913_2	150	VFG016309	330	2.3e-51	67.1	VFG016309 (galE) UDP-glucose 4-epimerase Polysaccharide capsule (CVF567)	Bacillus thuringiensis serovar konkukian str. 97-27
scaffold_44898_1	151	VFG016417	297	2.3e-59	77.5	VFG016417 (gtaB) UTP--glucose-1-phosphate uridylyltransferase Polysaccharide capsule (CVF567)	Bacillus thuringiensis serovar konkukian str. 97-27
scaffold_45811_2	43	VFG016417	297	2.0e-16	90.5	VFG016417 (gtaB) UTP--glucose-1-phosphate uridylyltransferase Polysaccharide capsule (CVF567)	Bacillus thuringiensis serovar konkukian str. 97-27
scaffold_67650_1	115	VFG016417	297	2.9e-38	73.4	VFG016417 (gtaB) UTP--glucose-1-phosphate uridylyltransferase Polysaccharide capsule (CVF567)	Bacillus thuringiensis serovar konkukian str. 97-27
scaffold_78409_1	48	VFG016309	330	5.1e-13	60.0	VFG016309 (galE) UDP-glucose 4-epimerase Polysaccharide capsule (CVF567)	Bacillus thuringiensis serovar konkukian str. 97-27
scaffold_29932_1	169	VFG016416	228	4.1e-57	64.1	VFG016416 (epsE) sugar transferase; probable phospho-glucosyltransferase Polysaccharide capsule (CVF567)	Bacillus thuringiensis serovar konkukian str. 97-27
scaffold_1771_4	277	VFG016424	315	5.8e-101	62.1	VFG016424 (manA) mannose-6-phosphate isomerase Polysaccharide capsule (CVF567)	Bacillus thuringiensis str. Al Hakam
scaffold_2895_2	292	VFG016433	291	7.4e-107	63.8	VFG016433 (gtaB) UTP--glucose-1-phosphate uridylyltransferase Polysaccharide capsule (CVF567)	Bacillus thuringiensis str. Al Hakam
scaffold_5456_1	290	VFG016433	291	2.5e-102	61.3	VFG016433 (gtaB) UTP--glucose-1-phosphate uridylyltransferase Polysaccharide capsule (CVF567)	Bacillus thuringiensis str. Al Hakam
scaffold_10483_1	297	VFG016433	291	9.2e-97	61.0	VFG016433 (gtaB) UTP--glucose-1-phosphate uridylyltransferase Polysaccharide capsule (CVF567)	Bacillus thuringiensis str. Al Hakam
scaffold_13688_1	293	VFG016433	291	2.6e-99	61.4	VFG016433 (gtaB) UTP--glucose-1-phosphate uridylyltransferase Polysaccharide capsule (CVF567)	Bacillus thuringiensis str. Al Hakam
scaffold_15120_1	285	VFG016433	291	1.3e-92	60.0	VFG016433 (gtaB) UTP--glucose-1-phosphate uridylyltransferase Polysaccharide capsule (CVF567)	Bacillus thuringiensis str. Al Hakam
scaffold_23999_1	229	VFG016433	291	3.2e-97	76.4	VFG016433 (gtaB) UTP--glucose-1-phosphate uridylyltransferase Polysaccharide capsule (CVF567)	Bacillus thuringiensis str. Al Hakam
scaffold_29309_1	199	VFG016424	315	3.6e-81	68.7	VFG016424 (manA) mannose-6-phosphate isomerase Polysaccharide capsule (CVF567)	Bacillus thuringiensis str. Al Hakam
scaffold_429_19	100	VFG011229	391	4.6e-16	63.0	VFG011229 (flaA) flagellin Flagella (CVF382)	Bordetella pertussis Tohama I
scaffold_28865_2	78	VFG011277	139	1.0e-18	60.8	VFG011277 (flgC) flagellar basal body rod protein Flagella (CVF382)	Bordetella pertussis Tohama I
scaffold_72119_1	109	VFG000035	362	1.6e-30	62.2	VFG000035 (bplD) UDP-N-acetylglucosamine 2-epimerase LPS (VF0033)	Bordetella pertussis Tohama I
scaffold_5_116	78	VFG011430	78	9.1e-20	61.8	VFG011430 (acpXL) acyl carrier protein LPS (CVF383)	Brucella melitensis bv. 1 str. 16M
scaffold_69_51	74	VFG011430	78	5.8e-16	60.3	VFG011430 (acpXL) acyl carrier protein LPS (CVF383)	Brucella melitensis bv. 1 str. 16M
scaffold_70_20	75	VFG011430	78	2.8e-18	66.7	VFG011430 (acpXL) acyl carrier protein LPS (CVF383)	Brucella melitensis bv. 1 str. 16M
scaffold_80_8	78	VFG011430	78	2.5e-17	64.4	VFG011430 (acpXL) acyl carrier protein LPS (CVF383)	Brucella melitensis bv. 1 str. 16M
scaffold_264_13	363	VFG002225	362	4.7e-135	66.6	VFG002225 (gmd) GDP-mannose 4,6-dehydratase LPS (VF0367)	Brucella melitensis bv. 1 str. 16M
scaffold_2769_5	79	VFG011430	78	7.8e-19	60.5	VFG011430 (acpXL) acyl carrier protein LPS (CVF383)	Brucella melitensis bv. 1 str. 16M
scaffold_4603_1	169	VFG002218	361	2.2e-63	68.2	VFG002218 (virB11) type IV secretion system protein ATPase VirB11 VirB type IV secretion system (VF0365)	Brucella melitensis bv. 1 str. 16M
scaffold_4955_3	83	VFG011430	78	7.2e-15	61.0	VFG011430 (acpXL) acyl carrier protein LPS (CVF383)	Brucella melitensis bv. 1 str. 16M
scaffold_7720_2	78	VFG011430	78	3.1e-20	61.8	VFG011430 (acpXL) acyl carrier protein LPS (CVF383)	Brucella melitensis bv. 1 str. 16M
scaffold_12975_2	80	VFG011430	78	1.5e-17	64.9	VFG011430 (acpXL) acyl carrier protein LPS (CVF383)	Brucella melitensis bv. 1 str. 16M
scaffold_22079_2	64	VFG011430	78	3.4e-12	62.7	VFG011430 (acpXL) acyl carrier protein LPS (CVF383)	Brucella melitensis bv. 1 str. 16M
scaffold_29161_1	51	VFG011430	78	1.3e-11	66.7	VFG011430 (acpXL) acyl carrier protein LPS (CVF383)	Brucella melitensis bv. 1 str. 16M
scaffold_43652_2	81	VFG011430	78	6.4e-16	61.3	VFG011430 (acpXL) acyl carrier protein LPS (CVF383)	Brucella melitensis bv. 1 str. 16M
scaffold_19852_1	262	VFG041152	889	9.4e-69	66.3	VFG041152 (tssH/clpV/bscF) putative type VI secretion system protein TssH T6SS (SS193)	Burkholderia cenocepacia J2315
scaffold_52004_2	76	VFG041147	496	1.8e-28	76.0	VFG041147 (tssC/bscK) putative type VI secretion system protein TssC T6SS (SS193)	Burkholderia cenocepacia J2315
scaffold_69014_1	113	VFG041147	496	3.0e-48	78.8	VFG041147 (tssC/bscK) putative type VI secretion system protein TssC T6SS (SS193)	Burkholderia cenocepacia J2315
scaffold_43482_1	154	VFG012005	331	9.4e-61	72.4	VFG012005 (pseB) FlmA O-linked flagellar glycosylation (CVF399)	Campylobacter fetus subsp. fetus 82-40
scaffold_53933_1	96	VFG011801	186	2.7e-21	63.9	VFG011801 (gmhA) phosphoheptose isomerase LOS (CVF396)	Campylobacter fetus subsp. fetus 82-40
scaffold_66919_1	91	VFG011708	315	1.6e-20	62.0	VFG011708 (kpsF) arabinose-5-phosphate isomerase Capsule biosynthesis and transport (CVF393)	Campylobacter jejuni RM1221
scaffold_77914_1	101	VFG011947	433	2.9e-26	61.2	VFG011947 (flgR) sigma-54 dependent DNA-binding response regulator Flagella (CVF397)	Campylobacter jejuni RM1221
scaffold_48127_1	133	VFG017776	588	7.9e-40	62.4	VFG017776 (JJD26997_0056) hypothetical protein Flagella (CVF397)	Campylobacter jejuni subsp. doylei 269.97
scaffold_45901_1	149	VFG018021	461	4.0e-64	84.6	VFG018021 (waaE) putative ADP-heptose synthase LOS (CVF396)	Campylobacter jejuni subsp. jejuni 81116
scaffold_80219_1	98	VFG017972	351	1.1e-41	80.6	VFG017972 (C8J_1329) hypothetical protein Capsule biosynthesis and transport (CVF393)	Campylobacter jejuni subsp. jejuni 81116
scaffold_8956_1	276	VFG011700	344	3.3e-149	92.8	VFG011700 (wcbK) GDP-mannose 4,6-dehydratase Capsule biosynthesis and transport (CVF393)	Campylobacter jejuni subsp. jejuni 81-176
scaffold_8956_2	194	VFG011703	352	4.1e-69	62.5	VFG011703 (fcl) GDP-fucose synthetase Capsule biosynthesis and transport (CVF393)	Campylobacter jejuni subsp. jejuni 81-176
scaffold_16272_1	62	VFG011703	352	2.9e-16	60.0	VFG011703 (fcl) GDP-fucose synthetase Capsule biosynthesis and transport (CVF393)	Campylobacter jejuni subsp. jejuni 81-176
scaffold_16272_2	182	VFG011712	181	8.2e-96	89.9	VFG011712 (CJJ81176_1430) putative nucleotide-sugar epimerase-dehydratase Capsule biosynthesis and transport (CVF393)	Campylobacter jejuni subsp. jejuni 81-176
scaffold_24747_1	68	VFG011700	344	3.8e-30	85.1	VFG011700 (wcbK) GDP-mannose 4,6-dehydratase Capsule biosynthesis and transport (CVF393)	Campylobacter jejuni subsp. jejuni 81-176
scaffold_28934_1	200	VFG011721	493	5.9e-71	71.3	VFG011721 (CJJ81176_1433) putative sugar transferase Capsule biosynthesis and transport (CVF393)	Campylobacter jejuni subsp. jejuni 81-176
scaffold_29456_1	198	VFG011960	576	7.5e-95	94.4	VFG011960 (flaA) flagellin B Flagella (CVF397)	Campylobacter jejuni subsp. jejuni 81-176
scaffold_38486_1	166	VFG011697	312	9.2e-54	95.3	VFG011697 (CJJ81176_1425) HrEpiB Capsule biosynthesis and transport (CVF393)	Campylobacter jejuni subsp. jejuni 81-176
scaffold_40982_1	159	VFG011694	339	3.7e-84	95.0	VFG011694 (CJJ81176_1424) capsular biosynthesis sugar kinase, putative Capsule biosynthesis and transport (CVF393)	Campylobacter jejuni subsp. jejuni 81-176
scaffold_55372_1	132	VFG011956	576	1.1e-22	62.2	VFG011956 (flaB) flagellin B Flagella (CVF397)	Campylobacter jejuni subsp. jejuni 81-176
scaffold_68585_1	114	VFG011788	291	3.3e-50	79.6	VFG011788 (CJJ81176_1157) alpha-2,3-sialyltransferase LOS (CVF396)	Campylobacter jejuni subsp. jejuni 81-176
scaffold_20363_1	258	VFG001949	612	9.5e-98	68.8	VFG001949 (Cj1421c) sugar transferase Capsule (VF0323)	Campylobacter jejuni subsp. jejuni NCTC 11168
scaffold_23216_1	235	VFG044075	709	6.4e-85	60.4	VFG044075 (chuA) haemin uptake system outer membrane receptor direct heme uptake system (IA056)	Campylobacter jejuni subsp. jejuni NCTC 11168
scaffold_24747_2	147	VFG001955	313	7.6e-76	89.1	VFG001955 (Cj1427c) sugar-nucleotide epimerase/dehydratease Capsule (VF0323)	Campylobacter jejuni subsp. jejuni NCTC 11168
scaffold_35040_1	173	VFG001899	276	4.0e-76	87.2	VFG001899 (fliH) flagellar assembly protein H Flagella (VF0114)	Campylobacter jejuni subsp. jejuni NCTC 11168
scaffold_49375_1	87	VFG043397	220	8.6e-35	82.6	VFG043397 (flgA) flagellar basal body P-ring biosynthesis protein FlgA Pse5Ac7Ac, Pse5Ac7Am, Pse8OAc, Pse5Am7AcGlnAc (AI151)	Campylobacter jejuni subsp. jejuni NCTC 11168
scaffold_52768_2	84	VFG001894	238	1.8e-37	93.8	VFG001894 (fliA) flagellar biosynthesis sigma factor Flagella (VF0114)	Campylobacter jejuni subsp. jejuni NCTC 11168
scaffold_57178_1	129	VFG001930	865	2.2e-50	78.1	VFG001930 (flgE) flagellar hook protein Flagella (VF0114)	Campylobacter jejuni subsp. jejuni NCTC 11168
scaffold_63235_1	121	VFG001893	359	9.1e-59	99.2	VFG001893 (fliM) flagellar motor switch protein FliM Flagella (VF0114)	Campylobacter jejuni subsp. jejuni NCTC 11168
scaffold_66207_1	109	VFG001948	319	1.5e-41	78.0	VFG001948 (waaF) heptosyltransferase II LOS (VF0326)	Campylobacter jejuni subsp. jejuni NCTC 11168
scaffold_66873_1	30	VFG001912	270	6.6e-11	96.7	VFG001912 (flgF) flagellar basal-body rod protein Flagella (VF0114)	Campylobacter jejuni subsp. jejuni NCTC 11168
scaffold_80474_1	97	VFG001972	552	3.7e-39	79.2	VFG001972 (kpsD) capsule polysaccharide export system periplasmic protein Capsule (VF0323)	Campylobacter jejuni subsp. jejuni NCTC 11168
scaffold_161_27	612	VFG043573	660	2.4e-192	60.3	VFG043573 (CT396) molecular chaperone DnaK MOMP (AI392)	Chlamydia trachomatis D/UW-3/CX
scaffold_194_14	640	VFG043573	660	2.4e-206	66.6	VFG043573 (CT396) molecular chaperone DnaK MOMP (AI392)	Chlamydia trachomatis D/UW-3/CX
scaffold_236_10	640	VFG043573	660	9.9e-197	62.1	VFG043573 (CT396) molecular chaperone DnaK MOMP (AI392)	Chlamydia trachomatis D/UW-3/CX
scaffold_2106_1	57	VFG043573	660	2.0e-16	73.2	VFG043573 (CT396) molecular chaperone DnaK MOMP (AI392)	Chlamydia trachomatis D/UW-3/CX
scaffold_2665_3	345	VFG043573	660	1.5e-122	64.4	VFG043573 (CT396) molecular chaperone DnaK MOMP (AI392)	Chlamydia trachomatis D/UW-3/CX
scaffold_3037_5	210	VFG043573	660	1.7e-73	64.2	VFG043573 (CT396) molecular chaperone DnaK MOMP (AI392)	Chlamydia trachomatis D/UW-3/CX
scaffold_4403_1	349	VFG043573	660	3.0e-123	63.4	VFG043573 (CT396) molecular chaperone DnaK MOMP (AI392)	Chlamydia trachomatis D/UW-3/CX
scaffold_4452_4	57	VFG043573	660	2.0e-16	73.2	VFG043573 (CT396) molecular chaperone DnaK MOMP (AI392)	Chlamydia trachomatis D/UW-3/CX
scaffold_6759_1	247	VFG043573	660	4.3e-55	63.9	VFG043573 (CT396) molecular chaperone DnaK MOMP (AI392)	Chlamydia trachomatis D/UW-3/CX
scaffold_7624_1	394	VFG043573	660	1.9e-145	67.2	VFG043573 (CT396) molecular chaperone DnaK MOMP (AI392)	Chlamydia trachomatis D/UW-3/CX
scaffold_8298_1	506	VFG043573	660	1.4e-156	60.4	VFG043573 (CT396) molecular chaperone DnaK MOMP (AI392)	Chlamydia trachomatis D/UW-3/CX
scaffold_11755_1	59	VFG043573	660	1.0e-18	74.1	VFG043573 (CT396) molecular chaperone DnaK MOMP (AI392)	Chlamydia trachomatis D/UW-3/CX
scaffold_12688_1	364	VFG043573	660	1.8e-126	63.2	VFG043573 (CT396) molecular chaperone DnaK MOMP (AI392)	Chlamydia trachomatis D/UW-3/CX
scaffold_14000_1	339	VFG043573	660	6.3e-126	67.2	VFG043573 (CT396) molecular chaperone DnaK MOMP (AI392)	Chlamydia trachomatis D/UW-3/CX
scaffold_16216_2	190	VFG043573	660	7.3e-63	65.4	VFG043573 (CT396) molecular chaperone DnaK MOMP (AI392)	Chlamydia trachomatis D/UW-3/CX
scaffold_17383_2	155	VFG043573	660	1.3e-49	65.8	VFG043573 (CT396) molecular chaperone DnaK MOMP (AI392)	Chlamydia trachomatis D/UW-3/CX
scaffold_19362_1	267	VFG043573	660	2.1e-92	63.3	VFG043573 (CT396) molecular chaperone DnaK MOMP (AI392)	Chlamydia trachomatis D/UW-3/CX
scaffold_21071_1	251	VFG043573	660	2.5e-87	65.6	VFG043573 (CT396) molecular chaperone DnaK MOMP (AI392)	Chlamydia trachomatis D/UW-3/CX
scaffold_22721_1	231	VFG043573	660	9.1e-76	66.2	VFG043573 (CT396) molecular chaperone DnaK MOMP (AI392)	Chlamydia trachomatis D/UW-3/CX
scaffold_25548_1	219	VFG043573	660	3.2e-70	61.9	VFG043573 (CT396) molecular chaperone DnaK MOMP (AI392)	Chlamydia trachomatis D/UW-3/CX
scaffold_29447_2	94	VFG043573	660	1.2e-21	63.2	VFG043573 (CT396) molecular chaperone DnaK MOMP (AI392)	Chlamydia trachomatis D/UW-3/CX
scaffold_34071_1	180	VFG043573	660	1.3e-58	62.2	VFG043573 (CT396) molecular chaperone DnaK MOMP (AI392)	Chlamydia trachomatis D/UW-3/CX
scaffold_36087_2	65	VFG043573	660	2.6e-20	71.4	VFG043573 (CT396) molecular chaperone DnaK MOMP (AI392)	Chlamydia trachomatis D/UW-3/CX
scaffold_36378_2	71	VFG043573	660	3.7e-20	69.6	VFG043573 (CT396) molecular chaperone DnaK MOMP (AI392)	Chlamydia trachomatis D/UW-3/CX
scaffold_37631_1	169	VFG043573	660	1.6e-53	63.1	VFG043573 (CT396) molecular chaperone DnaK MOMP (AI392)	Chlamydia trachomatis D/UW-3/CX
scaffold_40622_1	160	VFG043573	660	1.7e-52	61.9	VFG043573 (CT396) molecular chaperone DnaK MOMP (AI392)	Chlamydia trachomatis D/UW-3/CX
scaffold_47698_1	145	VFG043573	660	2.1e-49	70.1	VFG043573 (CT396) molecular chaperone DnaK MOMP (AI392)	Chlamydia trachomatis D/UW-3/CX
scaffold_51639_1	138	VFG043573	660	3.3e-41	60.5	VFG043573 (CT396) molecular chaperone DnaK MOMP (AI392)	Chlamydia trachomatis D/UW-3/CX
scaffold_55069_1	132	VFG043573	660	1.1e-38	60.5	VFG043573 (CT396) molecular chaperone DnaK MOMP (AI392)	Chlamydia trachomatis D/UW-3/CX
scaffold_55922_1	91	VFG043573	660	3.3e-29	70.0	VFG043573 (CT396) molecular chaperone DnaK MOMP (AI392)	Chlamydia trachomatis D/UW-3/CX
scaffold_59712_1	126	VFG043573	660	1.6e-45	73.8	VFG043573 (CT396) molecular chaperone DnaK MOMP (AI392)	Chlamydia trachomatis D/UW-3/CX
scaffold_74118_1	98	VFG043573	660	5.5e-30	61.2	VFG043573 (CT396) molecular chaperone DnaK MOMP (AI392)	Chlamydia trachomatis D/UW-3/CX
scaffold_76499_1	103	VFG043573	660	3.2e-36	68.9	VFG043573 (CT396) molecular chaperone DnaK MOMP (AI392)	Chlamydia trachomatis D/UW-3/CX
scaffold_21516_1	165	VFG043575	544	1.7e-55	70.7	VFG043575 (CPn0134) chaperonin GroEL polymorphic membrane protein (PmpD)/pmp21 (AI394)	Chlamydophila pneumoniae CWL029
scaffold_26912_1	210	VFG043575	544	1.9e-72	65.7	VFG043575 (CPn0134) chaperonin GroEL polymorphic membrane protein (PmpD)/pmp21 (AI394)	Chlamydophila pneumoniae CWL029
scaffold_54408_1	67	VFG043575	544	2.5e-18	61.2	VFG043575 (CPn0134) chaperonin GroEL polymorphic membrane protein (PmpD)/pmp21 (AI394)	Chlamydophila pneumoniae CWL029
scaffold_64591_1	119	VFG041196	780	8.4e-33	60.6	VFG041196 (cts1G/vgrG) VgrG family T6SS protein Cts1G CTS1 (SS186)	Citrobacter rodentium ICC168
scaffold_23150_1	235	VFG012101	543	4.0e-87	71.1	VFG012101 (groEL) chaperonin GroEL GroEL (CVF403)	Clostridium acetobutylicum ATCC 824
scaffold_18_12	543	VFG012102	541	1.5e-246	83.0	VFG012102 (groEL) chaperonin GroEL GroEL (CVF403)	Clostridium beijerinckii NCIMB 8052
scaffold_2443_7	204	VFG012173	215	9.9e-66	60.6	VFG012173 (Cbei_0023) channel protein, hemolysin III family Hemolysin (CVF417)	Clostridium beijerinckii NCIMB 8052
scaffold_2669_5	56	VFG012112	577	2.9e-12	79.1	VFG012112 (fbp) Fibronectin-binding A domain protein Fibronectin-binding protein (CVF404)	Clostridium beijerinckii NCIMB 8052
scaffold_3364_2	543	VFG012102	541	8.0e-264	87.5	VFG012102 (groEL) chaperonin GroEL GroEL (CVF403)	Clostridium beijerinckii NCIMB 8052
scaffold_9284_2	385	VFG012102	541	4.3e-155	74.5	VFG012102 (groEL) chaperonin GroEL GroEL (CVF403)	Clostridium beijerinckii NCIMB 8052
scaffold_11555_1	391	VFG012102	541	8.2e-170	79.2	VFG012102 (groEL) chaperonin GroEL GroEL (CVF403)	Clostridium beijerinckii NCIMB 8052
scaffold_23329_1	234	VFG012112	577	9.2e-84	68.2	VFG012112 (fbp) Fibronectin-binding A domain protein Fibronectin-binding protein (CVF404)	Clostridium beijerinckii NCIMB 8052
scaffold_49691_1	142	VFG012102	541	7.6e-57	79.6	VFG012102 (groEL) chaperonin GroEL GroEL (CVF403)	Clostridium beijerinckii NCIMB 8052
scaffold_62454_1	122	VFG012102	541	5.7e-53	86.8	VFG012102 (groEL) chaperonin GroEL GroEL (CVF403)	Clostridium beijerinckii NCIMB 8052
scaffold_62468_2	98	VFG012183	269	3.5e-37	76.5	VFG012183 (Cbei_1707) hemolysin A Hemolysin (CVF417)	Clostridium beijerinckii NCIMB 8052
scaffold_67009_1	116	VFG012102	541	8.7e-43	76.5	VFG012102 (groEL) chaperonin GroEL GroEL (CVF403)	Clostridium beijerinckii NCIMB 8052
scaffold_74840_2	44	VFG012183	269	8.0e-13	67.4	VFG012183 (Cbei_1707) hemolysin A Hemolysin (CVF417)	Clostridium beijerinckii NCIMB 8052
scaffold_78077_1	101	VFG012112	577	2.1e-29	63.2	VFG012112 (fbp) Fibronectin-binding A domain protein Fibronectin-binding protein (CVF404)	Clostridium beijerinckii NCIMB 8052
scaffold_79572_1	99	VFG012102	541	2.0e-35	78.0	VFG012102 (groEL) chaperonin GroEL GroEL (CVF403)	Clostridium beijerinckii NCIMB 8052
scaffold_2669_7	118	VFG019140	576	2.7e-47	75.4	VFG019140 (fbp) fibronectin-binding protein Fibronectin-binding protein (CVF404)	Clostridium botulinum B str. Eklund 17B
scaffold_3637_4	270	VFG019168	269	1.4e-112	76.2	VFG019168 (CLL_A2400) hemolysin A Hemolysin (CVF417)	Clostridium botulinum B str. Eklund 17B
scaffold_42038_1	157	VFG019134	540	5.5e-56	67.9	VFG019134 (groEL) chaperonin GroL GroEL (CVF403)	Clostridium botulinum B str. Eklund 17B
scaffold_60303_1	125	VFG019140	576	7.7e-45	71.2	VFG019140 (fbp) fibronectin-binding protein Fibronectin-binding protein (CVF404)	Clostridium botulinum B str. Eklund 17B
scaffold_66444_1	117	VFG019134	540	1.4e-53	90.6	VFG019134 (groEL) chaperonin GroL GroEL (CVF403)	Clostridium botulinum B str. Eklund 17B
scaffold_76698_1	75	VFG019140	576	2.7e-21	63.9	VFG019140 (fbp) fibronectin-binding protein Fibronectin-binding protein (CVF404)	Clostridium botulinum B str. Eklund 17B
scaffold_90_17	594	VFG012104	591	3.0e-248	72.0	VFG012104 (fbpA) fibronectin-binding protein Fibronectin-binding protein (AI155)	Clostridium difficile 630
scaffold_251_9	541	VFG012095	542	3.8e-258	85.6	VFG012095 (groEL) 60 kDa chaperonin GroEL(Hsp60) (AI317)	Clostridium difficile 630
scaffold_994_14	271	VFG012175	270	4.4e-130	85.2	VFG012175 (CD1208) putative RNA methyltransferase Hemolysin (CVF417)	Clostridium difficile 630
scaffold_1486_1	107	VFG043285	290	1.6e-30	63.6	VFG043285 (fliC) flagellin subunit HexNAc (AI148)	Clostridium difficile 630
scaffold_1500_1	107	VFG043285	290	1.6e-30	63.6	VFG043285 (fliC) flagellin subunit HexNAc (AI148)	Clostridium difficile 630
scaffold_1810_6	135	VFG043292	134	2.2e-45	65.7	VFG043292 (flgC) flagellar basal-body rod protein HexNAc (AI148)	Clostridium difficile 630
scaffold_2336_1	356	VFG043297	439	3.5e-151	74.4	VFG043297 (fliI) flagellum-specific ATP synthase HexNAc (AI148)	Clostridium difficile 630
scaffold_2469_1	648	VFG043310	691	5.1e-241	68.3	VFG043310 (flhA) flagellar biosynthesis protein FlhA HexNAc (AI148)	Clostridium difficile 630
scaffold_3280_3	67	VFG012095	542	2.1e-17	72.6	VFG012095 (groEL) 60 kDa chaperonin GroEL(Hsp60) (AI317)	Clostridium difficile 630
scaffold_3605_2	221	VFG043307	221	3.7e-66	63.7	VFG043307 (fliP) flagellar biosynthesis protein FliP HexNAc (AI148)	Clostridium difficile 630
scaffold_3605_6	63	VFG043309	604	4.5e-17	68.4	VFG043309 (flhB) bifunctional flagellar biosynthesis protein FliR/FlhB HexNAc (AI148)	Clostridium difficile 630
scaffold_6855_1	241	VFG043297	439	1.4e-98	73.1	VFG043297 (fliI) flagellum-specific ATP synthase HexNAc (AI148)	Clostridium difficile 630
scaffold_7688_3	164	VFG043297	439	8.0e-50	62.7	VFG043297 (fliI) flagellum-specific ATP synthase HexNAc (AI148)	Clostridium difficile 630
scaffold_8375_2	223	VFG043307	221	6.8e-68	65.4	VFG043307 (fliP) flagellar biosynthesis protein FliP HexNAc (AI148)	Clostridium difficile 630
scaffold_8375_4	56	VFG043301	327	1.2e-13	66.7	VFG043301 (flgE) flagellar hook protein HexNAc (AI148)	Clostridium difficile 630
scaffold_11737_3	202	VFG043297	439	1.4e-83	77.0	VFG043297 (fliI) flagellum-specific ATP synthase HexNAc (AI148)	Clostridium difficile 630
scaffold_13607_1	328	VFG043310	691	1.8e-122	71.2	VFG043310 (flhA) flagellar biosynthesis protein FlhA HexNAc (AI148)	Clostridium difficile 630
scaffold_14861_2	47	VFG012104	591	7.0e-15	74.5	VFG012104 (fbpA) fibronectin-binding protein Fibronectin-binding protein (AI155)	Clostridium difficile 630
scaffold_17259_1	222	VFG043307	221	3.2e-70	62.7	VFG043307 (fliP) flagellar biosynthesis protein FliP HexNAc (AI148)	Clostridium difficile 630
scaffold_20269_2	104	VFG043297	439	1.2e-30	64.7	VFG043297 (fliI) flagellum-specific ATP synthase HexNAc (AI148)	Clostridium difficile 630
scaffold_22248_1	241	VFG043310	691	2.9e-80	62.0	VFG043310 (flhA) flagellar biosynthesis protein FlhA HexNAc (AI148)	Clostridium difficile 630
scaffold_24143_1	48	VFG043309	604	2.5e-12	68.2	VFG043309 (flhB) bifunctional flagellar biosynthesis protein FliR/FlhB HexNAc (AI148)	Clostridium difficile 630
scaffold_24143_2	176	VFG043310	691	2.2e-58	68.8	VFG043310 (flhA) flagellar biosynthesis protein FlhA HexNAc (AI148)	Clostridium difficile 630
scaffold_24428_1	196	VFG012175	270	8.0e-89	82.6	VFG012175 (CD1208) putative RNA methyltransferase Hemolysin (CVF417)	Clostridium difficile 630
scaffold_25659_1	76	VFG043317	124	3.6e-21	60.3	VFG043317 (fliN) putative flagellar motor switch protein HexNAc (AI148)	Clostridium difficile 630
scaffold_26432_1	213	VFG043297	439	1.3e-92	79.9	VFG043297 (fliI) flagellum-specific ATP synthase HexNAc (AI148)	Clostridium difficile 630
scaffold_28683_1	64	VFG043292	134	7.5e-20	69.8	VFG043292 (flgC) flagellar basal-body rod protein HexNAc (AI148)	Clostridium difficile 630
scaffold_30740_2	51	VFG043297	439	1.7e-11	62.0	VFG043297 (fliI) flagellum-specific ATP synthase HexNAc (AI148)	Clostridium difficile 630
scaffold_31326_1	177	VFG043297	439	9.5e-73	76.6	VFG043297 (fliI) flagellum-specific ATP synthase HexNAc (AI148)	Clostridium difficile 630
scaffold_32521_1	186	VFG043310	691	7.4e-76	74.7	VFG043310 (flhA) flagellar biosynthesis protein FlhA HexNAc (AI148)	Clostridium difficile 630
scaffold_34921_1	69	VFG043310	691	3.6e-20	64.7	VFG043310 (flhA) flagellar biosynthesis protein FlhA HexNAc (AI148)	Clostridium difficile 630
scaffold_35317_1	176	VFG012095	542	5.9e-83	90.9	VFG012095 (groEL) 60 kDa chaperonin GroEL(Hsp60) (AI317)	Clostridium difficile 630
scaffold_37278_2	105	VFG012095	542	1.9e-44	85.7	VFG012095 (groEL) 60 kDa chaperonin GroEL(Hsp60) (AI317)	Clostridium difficile 630
scaffold_37612_1	168	VFG043310	691	2.1e-53	63.1	VFG043310 (flhA) flagellar biosynthesis protein FlhA HexNAc (AI148)	Clostridium difficile 630
scaffold_37676_1	50	VFG043291	105	8.2e-14	75.6	VFG043291 (flgB) flagellar basal-body rod protein HexNAc (AI148)	Clostridium difficile 630
scaffold_37676_2	56	VFG043285	290	4.5e-13	71.4	VFG043285 (fliC) flagellin subunit HexNAc (AI148)	Clostridium difficile 630
scaffold_42655_1	119	VFG043309	604	9.3e-40	66.4	VFG043309 (flhB) bifunctional flagellar biosynthesis protein FliR/FlhB HexNAc (AI148)	Clostridium difficile 630
scaffold_42940_1	150	VFG043309	604	1.9e-61	77.2	VFG043309 (flhB) bifunctional flagellar biosynthesis protein FliR/FlhB HexNAc (AI148)	Clostridium difficile 630
scaffold_47043_1	135	VFG043303	272	3.3e-33	61.6	VFG043303 (motA) chemotaxis protein HexNAc (AI148)	Clostridium difficile 630
scaffold_48152_1	116	VFG043303	272	1.3e-30	61.2	VFG043303 (motA) chemotaxis protein HexNAc (AI148)	Clostridium difficile 630
scaffold_48659_1	143	VFG012095	542	1.4e-66	90.2	VFG012095 (groEL) 60 kDa chaperonin GroEL(Hsp60) (AI317)	Clostridium difficile 630
scaffold_49438_1	142	VFG043310	691	6.3e-51	76.4	VFG043310 (flhA) flagellar biosynthesis protein FlhA HexNAc (AI148)	Clostridium difficile 630
scaffold_49861_1	141	VFG043310	691	9.6e-44	69.5	VFG043310 (flhA) flagellar biosynthesis protein FlhA HexNAc (AI148)	Clostridium difficile 630
scaffold_53151_1	135	VFG043294	516	2.7e-43	61.9	VFG043294 (fliF) flagellar MS-ring protein HexNAc (AI148)	Clostridium difficile 630
scaffold_55240_1	132	VFG043297	439	6.4e-50	67.4	VFG043297 (fliI) flagellum-specific ATP synthase HexNAc (AI148)	Clostridium difficile 630
scaffold_55808_1	105	VFG012095	542	1.8e-42	83.8	VFG012095 (groEL) 60 kDa chaperonin GroEL(Hsp60) (AI317)	Clostridium difficile 630
scaffold_56932_1	130	VFG043310	691	1.5e-35	63.3	VFG043310 (flhA) flagellar biosynthesis protein FlhA HexNAc (AI148)	Clostridium difficile 630
scaffold_57223_1	129	VFG012104	591	5.1e-52	79.8	VFG012104 (fbpA) fibronectin-binding protein Fibronectin-binding protein (AI155)	Clostridium difficile 630
scaffold_62631_1	51	VFG012175	270	8.1e-17	71.4	VFG012175 (CD1208) putative RNA methyltransferase Hemolysin (CVF417)	Clostridium difficile 630
scaffold_64535_1	91	VFG043291	105	4.2e-24	62.9	VFG043291 (flgB) flagellar basal-body rod protein HexNAc (AI148)	Clostridium difficile 630
scaffold_66599_1	100	VFG043292	134	4.0e-36	76.0	VFG043292 (flgC) flagellar basal-body rod protein HexNAc (AI148)	Clostridium difficile 630
scaffold_67533_1	115	VFG043297	439	1.5e-55	90.4	VFG043297 (fliI) flagellum-specific ATP synthase HexNAc (AI148)	Clostridium difficile 630
scaffold_68565_1	57	VFG043292	134	6.9e-17	71.9	VFG043292 (flgC) flagellar basal-body rod protein HexNAc (AI148)	Clostridium difficile 630
scaffold_68565_2	55	VFG043291	105	3.2e-11	63.0	VFG043291 (flgB) flagellar basal-body rod protein HexNAc (AI148)	Clostridium difficile 630
scaffold_72396_1	61	VFG043301	327	3.1e-15	70.6	VFG043301 (flgE) flagellar hook protein HexNAc (AI148)	Clostridium difficile 630
scaffold_72493_1	109	VFG043310	691	5.1e-37	70.4	VFG043310 (flhA) flagellar biosynthesis protein FlhA HexNAc (AI148)	Clostridium difficile 630
scaffold_72505_1	108	VFG012175	270	9.0e-50	90.7	VFG012175 (CD1208) putative RNA methyltransferase Hemolysin (CVF417)	Clostridium difficile 630
scaffold_72594_1	97	VFG043292	134	1.5e-35	75.0	VFG043292 (flgC) flagellar basal-body rod protein HexNAc (AI148)	Clostridium difficile 630
scaffold_74091_1	107	VFG043310	691	5.2e-34	68.6	VFG043310 (flhA) flagellar biosynthesis protein FlhA HexNAc (AI148)	Clostridium difficile 630
scaffold_81669_1	91	VFG043285	290	9.0e-27	67.0	VFG043285 (fliC) flagellin subunit HexNAc (AI148)	Clostridium difficile 630
scaffold_3949_1	538	VFG012096	543	2.9e-218	74.8	VFG012096 (groEL) chaperonin GroEL GroEL (CVF403)	Clostridium novyi NT
scaffold_68316_1	114	VFG012096	543	1.5e-31	64.9	VFG012096 (groEL) chaperonin GroEL GroEL (CVF403)	Clostridium novyi NT
scaffold_73904_1	107	VFG012096	543	5.1e-37	70.1	VFG012096 (groEL) chaperonin GroEL GroEL (CVF403)	Clostridium novyi NT
scaffold_110_11	1168	VFG012139	1172	0.0e+00	73.4	VFG012139 (nagK) putative hyaluronoglucosaminidase Mu-toxin (neuraminidase) (CVF412)	Clostridium perfringens ATCC 13124
scaffold_142_17	380	VFG002285	382	4.3e-155	71.2	VFG002285 (nanH) sialidase sialidase (VF0391)	Clostridium perfringens ATCC 13124
scaffold_214_10	216	VFG012169	215	8.8e-105	90.7	VFG012169 (CPF_1725) hemolysin III Hemolysin (CVF417)	Clostridium perfringens ATCC 13124
scaffold_391_31	531	VFG012150	553	8.2e-229	74.4	VFG012150 (entB) NlpC/P60 family protein Enterotoxin (CVF414)	Clostridium perfringens ATCC 13124
scaffold_409_1	414	VFG012148	553	8.5e-141	60.4	VFG012148 (entD) N-acetylmuramoyl-L-alanine amidase, family 2 Enterotoxin (CVF414)	Clostridium perfringens ATCC 13124
scaffold_666_6	1625	VFG012133	1627	0.0e+00	76.7	VFG012133 (nagH) hyaluronidase Mu-toxin (neuraminidase) (CVF412)	Clostridium perfringens ATCC 13124
scaffold_744_9	540	VFG012098	539	2.7e-288	97.8	VFG012098 (groEL) chaperonin, 60 kDa GroEL (CVF403)	Clostridium perfringens ATCC 13124
scaffold_816_31	272	VFG012178	271	3.4e-138	92.3	VFG012178 (CPF_2072) hemolysin A Hemolysin (CVF417)	Clostridium perfringens ATCC 13124
scaffold_840_6	439	VFG012193	440	2.4e-162	68.0	VFG012193 (virS) sensor histidine kinase VirS VirR/VirS two component system (CVF421)	Clostridium perfringens ATCC 13124
scaffold_1070_2	540	VFG012098	539	1.4e-292	100.0	VFG012098 (groEL) chaperonin, 60 kDa GroEL (CVF403)	Clostridium perfringens ATCC 13124
scaffold_1234_6	781	VFG012135	1296	0.0e+00	99.6	VFG012135 (nagI) putative hyaluronoglucosaminidase Mu-toxin (neuraminidase) (CVF412)	Clostridium perfringens ATCC 13124
scaffold_1294_7	272	VFG012178	271	7.3e-149	99.6	VFG012178 (CPF_2072) hemolysin A Hemolysin (CVF417)	Clostridium perfringens ATCC 13124
scaffold_1926_7	426	VFG012193	440	2.8e-232	100.0	VFG012193 (virS) sensor histidine kinase VirS VirR/VirS two component system (CVF421)	Clostridium perfringens ATCC 13124
scaffold_2002_2	214	VFG012185	213	2.9e-116	100.0	VFG012185 (hlyIII) hemolysin III Hemolysin (CVF417)	Clostridium perfringens ATCC 13124
scaffold_2274_4	551	VFG012150	553	1.5e-289	94.8	VFG012150 (entB) NlpC/P60 family protein Enterotoxin (CVF414)	Clostridium perfringens ATCC 13124
scaffold_3299_1	1002	VFG012137	1001	0.0e+00	98.6	VFG012137 (nagJ) putative hyaluronidase Mu-toxin (neuraminidase) (CVF412)	Clostridium perfringens ATCC 13124
scaffold_3510_2	395	VFG002285	382	5.3e-225	99.0	VFG002285 (nanH) sialidase sialidase (VF0391)	Clostridium perfringens ATCC 13124
scaffold_3533_1	971	VFG012133	1627	0.0e+00	97.8	VFG012133 (nagH) hyaluronidase Mu-toxin (neuraminidase) (CVF412)	Clostridium perfringens ATCC 13124
scaffold_3960_1	847	VFG012143	947	0.0e+00	91.9	VFG012143 (entA) putative enterotoxin Enterotoxin (CVF414)	Clostridium perfringens ATCC 13124
scaffold_5459_1	256	VFG012146	744	2.1e-105	100.0	VFG012146 (entC) hypothetical protein Enterotoxin (CVF414)	Clostridium perfringens ATCC 13124
scaffold_5695_4	566	VFG012107	575	5.0e-301	92.9	VFG012107 (fbp) fibronectin-binding protein Fibronectin-binding protein (CVF404)	Clostridium perfringens ATCC 13124
scaffold_5710_1	566	VFG012107	575	0.0e+00	99.1	VFG012107 (fbp) fibronectin-binding protein Fibronectin-binding protein (CVF404)	Clostridium perfringens ATCC 13124
scaffold_6377_1	513	VFG012135	1296	3.2e-270	99.2	VFG012135 (nagI) putative hyaluronoglucosaminidase Mu-toxin (neuraminidase) (CVF412)	Clostridium perfringens ATCC 13124
scaffold_8084_1	441	VFG012148	553	5.9e-249	97.1	VFG012148 (entD) N-acetylmuramoyl-L-alanine amidase, family 2 Enterotoxin (CVF414)	Clostridium perfringens ATCC 13124
scaffold_10751_1	209	VFG012162	1173	1.9e-109	97.6	VFG012162 (nanJ) putative exo-alpha-sialidase Sialidase (CVF416)	Clostridium perfringens ATCC 13124
scaffold_22077_1	226	VFG012143	947	5.9e-128	97.8	VFG012143 (entA) putative enterotoxin Enterotoxin (CVF414)	Clostridium perfringens ATCC 13124
scaffold_37106_1	171	VFG012146	744	4.3e-62	100.0	VFG012146 (entC) hypothetical protein Enterotoxin (CVF414)	Clostridium perfringens ATCC 13124
scaffold_38221_1	167	VFG012137	1001	2.8e-66	73.9	VFG012137 (nagJ) putative hyaluronidase Mu-toxin (neuraminidase) (CVF412)	Clostridium perfringens ATCC 13124
scaffold_39814_1	162	VFG012133	1627	2.8e-71	75.3	VFG012133 (nagH) hyaluronidase Mu-toxin (neuraminidase) (CVF412)	Clostridium perfringens ATCC 13124
scaffold_65986_1	89	VFG012139	1172	2.2e-17	98.8	VFG012139 (nagK) putative hyaluronoglucosaminidase Mu-toxin (neuraminidase) (CVF412)	Clostridium perfringens ATCC 13124
scaffold_149_2	898	VFG012144	956	2.1e-309	66.1	VFG012144 (entA) probable enterotoxin Enterotoxin (CVF414)	Clostridium perfringens SM101
scaffold_3545_5	213	VFG012186	216	3.8e-100	86.3	VFG012186 (hlyIII) hemolysin III Hemolysin (CVF417)	Clostridium perfringens SM101
scaffold_22626_1	161	VFG012155	522	1.5e-85	99.4	VFG012155 (cloSI) clostripain Alpha-clostripain (CVF415)	Clostridium perfringens SM101
scaffold_142_46	1314	VFG002278	1297	0.0e+00	78.4	VFG002278 (nagI) hyaluronidase mu-toxin (VF0389)	Clostridium perfringens str. 13
scaffold_158_5	420	VFG002274	398	4.7e-203	83.4	VFG002274 (plc) phospholipase C alpha-toxin (CpPLC) (VF0378)	Clostridium perfringens str. 13
scaffold_227_8	446	VFG012163	445	9.6e-223	92.4	VFG012163 (hlyB) probable hemolysin Hemolysin (CVF417)	Clostridium perfringens str. 13
scaffold_322_9	1105	VFG002276	1104	0.0e+00	81.3	VFG002276 (colA) collagenase kappa-toxin (VF0388)	Clostridium perfringens str. 13
scaffold_526_5	1105	VFG002276	1104	0.0e+00	99.0	VFG002276 (colA) collagenase kappa-toxin (VF0388)	Clostridium perfringens str. 13
scaffold_591_1	378	VFG002282	524	3.3e-208	90.7	VFG002282 (cloSI) alpha-clostripain alpha-clostripain (VF0390)	Clostridium perfringens str. 13
scaffold_743_7	268	VFG012177	271	2.0e-90	63.8	VFG012177 (hlyD) probable hemolysin Hemolysin (CVF417)	Clostridium perfringens str. 13
scaffold_744_10	132	VFG042844	140	2.7e-32	65.0	VFG042844 (pilA1) prepilin peptidase dependent protein A type IV pili (AI109)	Clostridium perfringens str. 13
scaffold_744_11	248	VFG042843	247	6.5e-88	65.7	VFG042843 (pilD) prepilin peptidase type IV pili (AI109)	Clostridium perfringens str. 13
scaffold_816_1	34	VFG012106	575	1.4e-12	100.0	VFG012106 (fbpB) probable fibronectin-binding protein Fibronectin-binding protein (AI157)	Clostridium perfringens str. 13
scaffold_816_4	461	VFG042832	462	3.5e-212	78.3	VFG042832 (pilB) type IV pilus assembly protein type IV pili (AI109)	Clostridium perfringens str. 13
scaffold_816_5	339	VFG042831	339	5.2e-112	61.1	VFG042831 (pilC) fimbrial assembly protein type IV pili (AI109)	Clostridium perfringens str. 13
scaffold_840_5	244	VFG012195	236	6.4e-104	74.2	VFG012195 (virR) two-component response regulator VirR/VirS two component system (CVF421)	Clostridium perfringens str. 13
scaffold_949_1	161	VFG002282	524	1.4e-75	90.1	VFG002282 (cloSI) alpha-clostripain alpha-clostripain (VF0390)	Clostridium perfringens str. 13
scaffold_1008_9	216	VFG012168	215	1.3e-113	100.0	VFG012168 (hlyC) probable hemolysin Hemolysin (CVF417)	Clostridium perfringens str. 13
scaffold_1070_3	141	VFG042844	140	3.0e-69	99.3	VFG042844 (pilA1) prepilin peptidase dependent protein A type IV pili (AI109)	Clostridium perfringens str. 13
scaffold_1070_4	287	VFG042843	247	4.2e-131	99.2	VFG042843 (pilD) prepilin peptidase type IV pili (AI109)	Clostridium perfringens str. 13
scaffold_1070_5	563	VFG042842	563	5.5e-276	92.2	VFG042842 (pilB2) secretion system protein E type IV pili (AI109)	Clostridium perfringens str. 13
scaffold_1070_6	402	VFG042841	401	4.2e-201	94.5	VFG042841 (pilC2) type II secretion system protein F type IV pili (AI109)	Clostridium perfringens str. 13
scaffold_1176_6	399	VFG002274	398	3.5e-240	99.7	VFG002274 (plc) phospholipase C alpha-toxin (CpPLC) (VF0378)	Clostridium perfringens str. 13
scaffold_1240_1	90	VFG012147	635	1.2e-26	63.0	VFG012147 (entD) probable enterotoxin Enterotoxin (CVF414)	Clostridium perfringens str. 13
scaffold_1275_5	268	VFG012177	271	9.9e-90	63.0	VFG012177 (hlyD) probable hemolysin Hemolysin (CVF417)	Clostridium perfringens str. 13
scaffold_1286_3	1171	VFG002284	1173	0.0e+00	63.0	VFG002284 (nanJ) exo-alpha-sialidase sialidase (VF0391)	Clostridium perfringens str. 13
scaffold_1458_5	351	VFG042830	350	1.9e-165	85.7	VFG042830 (pilT) twitching motility protein PilT type IV pili (AI109)	Clostridium perfringens str. 13
scaffold_1926_5	154	VFG012195	236	1.5e-79	100.0	VFG012195 (virR) two-component response regulator VirR/VirS two component system (CVF421)	Clostridium perfringens str. 13
scaffold_1926_6	68	VFG012195	236	1.1e-32	100.0	VFG012195 (virR) two-component response regulator VirR/VirS two component system (CVF421)	Clostridium perfringens str. 13
scaffold_2041_1	1588	VFG002281	1127	0.0e+00	63.3	VFG002281 (nagL) hyaluronidase mu-toxin (VF0389)	Clostridium perfringens str. 13
scaffold_2049_1	433	VFG012163	445	9.0e-234	99.8	VFG012163 (hlyB) probable hemolysin Hemolysin (CVF417)	Clostridium perfringens str. 13
scaffold_2392_4	721	VFG002284	1173	0.0e+00	98.9	VFG002284 (nanJ) exo-alpha-sialidase sialidase (VF0391)	Clostridium perfringens str. 13
scaffold_2466_2	385	VFG042839	384	3.3e-195	94.5	VFG042839 (pilM) type IV pilus assembly protein PilM type IV pili (AI109)	Clostridium perfringens str. 13
scaffold_2466_3	189	VFG042838	188	7.9e-102	99.5	VFG042838 (pilN) hypothetical protein type IV pili (AI109)	Clostridium perfringens str. 13
scaffold_2466_4	406	VFG042837	405	2.5e-222	98.5	VFG042837 (CPE2281) hypothetical protein type IV pili (AI109)	Clostridium perfringens str. 13
scaffold_2473_3	351	VFG042830	350	1.5e-191	100.0	VFG042830 (pilT) twitching motility protein PilT type IV pili (AI109)	Clostridium perfringens str. 13
scaffold_2478_1	1128	VFG002281	1127	0.0e+00	99.7	VFG002281 (nagL) hyaluronidase mu-toxin (VF0389)	Clostridium perfringens str. 13
scaffold_2556_1	1169	VFG002280	1163	0.0e+00	71.7	VFG002280 (nagK) hyaluronidase mu-toxin (VF0389)	Clostridium perfringens str. 13
scaffold_2565_4	340	VFG042831	339	1.7e-179	98.8	VFG042831 (pilC) fimbrial assembly protein type IV pili (AI109)	Clostridium perfringens str. 13
scaffold_2565_5	463	VFG042832	462	4.4e-263	98.9	VFG042832 (pilB) type IV pilus assembly protein type IV pili (AI109)	Clostridium perfringens str. 13
scaffold_2952_1	1100	VFG002280	1163	0.0e+00	99.1	VFG002280 (nagK) hyaluronidase mu-toxin (VF0389)	Clostridium perfringens str. 13
scaffold_2980_1	517	VFG002275	500	9.9e-288	100.0	VFG002275 (pfoA) perfringolysin O theta-toxin/PFO (VF0382)	Clostridium perfringens str. 13
scaffold_3099_4	97	VFG012147	635	1.4e-49	99.0	VFG012147 (entD) probable enterotoxin Enterotoxin (CVF414)	Clostridium perfringens str. 13
scaffold_3469_3	352	VFG042830	350	1.8e-136	69.5	VFG042830 (pilT) twitching motility protein PilT type IV pili (AI109)	Clostridium perfringens str. 13
scaffold_4348_2	700	VFG002283	694	0.0e+00	99.3	VFG002283 (nanI) exo-alpha-sialidase sialidase (VF0391)	Clostridium perfringens str. 13
scaffold_4381_1	846	VFG002277	1628	0.0e+00	69.2	VFG002277 (nagH) hyaluronidase mu-toxin (VF0389)	Clostridium perfringens str. 13
scaffold_5062_3	34	VFG012106	575	1.4e-12	100.0	VFG012106 (fbpB) probable fibronectin-binding protein Fibronectin-binding protein (AI157)	Clostridium perfringens str. 13
scaffold_6320_3	348	VFG002281	1127	7.4e-162	75.6	VFG002281 (nagL) hyaluronidase mu-toxin (VF0389)	Clostridium perfringens str. 13
scaffold_7130_3	303	VFG002277	1628	3.9e-175	100.0	VFG002277 (nagH) hyaluronidase mu-toxin (VF0389)	Clostridium perfringens str. 13
scaffold_10754_1	378	VFG002282	524	3.2e-219	96.8	VFG002282 (cloSI) alpha-clostripain alpha-clostripain (VF0390)	Clostridium perfringens str. 13
scaffold_11407_1	131	VFG042836	333	1.1e-65	96.9	VFG042836 (CPE2280) hypothetical protein type IV pili (AI109)	Clostridium perfringens str. 13
scaffold_11407_2	264	VFG042835	702	3.3e-106	94.6	VFG042835 (CPE2279) hypothetical protein type IV pili (AI109)	Clostridium perfringens str. 13
scaffold_13737_2	217	VFG043440	220	5.1e-121	98.6	VFG043440 (fbpA) putative fibronectin-binding protein Fibronectin-binding protein (AI156)	Clostridium perfringens str. 13
scaffold_13816_1	171	VFG042835	702	7.0e-89	97.1	VFG042835 (CPE2279) hypothetical protein type IV pili (AI109)	Clostridium perfringens str. 13
scaffold_13816_2	162	VFG042834	186	6.2e-79	97.5	VFG042834 (CPE2278) hypothetical protein type IV pili (AI109)	Clostridium perfringens str. 13
scaffold_18792_3	59	VFG042840	182	1.3e-15	84.5	VFG042840 (pilA2) hypothetical protein type IV pili (AI109)	Clostridium perfringens str. 13
scaffold_20223_1	259	VFG002277	1628	8.8e-152	99.2	VFG002277 (nagH) hyaluronidase mu-toxin (VF0389)	Clostridium perfringens str. 13
scaffold_21847_1	245	VFG002284	1173	1.6e-139	98.4	VFG002284 (nanJ) exo-alpha-sialidase sialidase (VF0391)	Clostridium perfringens str. 13
scaffold_23244_1	234	VFG002275	500	3.2e-84	64.1	VFG002275 (pfoA) perfringolysin O theta-toxin/PFO (VF0382)	Clostridium perfringens str. 13
scaffold_23456_1	233	VFG042833	873	1.4e-108	81.0	VFG042833 (CPE2277) hypothetical protein type IV pili (AI109)	Clostridium perfringens str. 13
scaffold_24305_1	112	VFG042833	873	1.0e-56	99.1	VFG042833 (CPE2277) hypothetical protein type IV pili (AI109)	Clostridium perfringens str. 13
scaffold_32425_1	100	VFG002279	1001	2.8e-37	76.3	VFG002279 (nagJ) hyaluronidase mu-toxin (VF0389)	Clostridium perfringens str. 13
scaffold_32772_1	185	VFG042836	333	3.1e-98	97.8	VFG042836 (CPE2280) hypothetical protein type IV pili (AI109)	Clostridium perfringens str. 13
scaffold_34249_1	179	VFG042833	873	1.7e-93	98.8	VFG042833 (CPE2277) hypothetical protein type IV pili (AI109)	Clostridium perfringens str. 13
scaffold_37773_1	169	VFG042839	384	2.3e-60	81.8	VFG042839 (pilM) type IV pilus assembly protein PilM type IV pili (AI109)	Clostridium perfringens str. 13
scaffold_39107_1	165	VFG012145	625	8.6e-60	89.7	VFG012145 (entC) probable enterotoxin Enterotoxin (CVF414)	Clostridium perfringens str. 13
scaffold_40940_1	160	VFG042835	702	1.2e-77	92.5	VFG042835 (CPE2279) hypothetical protein type IV pili (AI109)	Clostridium perfringens str. 13
scaffold_42046_1	157	VFG042842	563	1.7e-57	66.9	VFG042842 (pilB2) secretion system protein E type IV pili (AI109)	Clostridium perfringens str. 13
scaffold_44053_1	152	VFG002277	1628	1.5e-47	63.4	VFG002277 (nagH) hyaluronidase mu-toxin (VF0389)	Clostridium perfringens str. 13
scaffold_45539_1	149	VFG042842	563	6.6e-51	66.4	VFG042842 (pilB2) secretion system protein E type IV pili (AI109)	Clostridium perfringens str. 13
scaffold_47362_2	91	VFG012149	549	1.6e-31	63.3	VFG012149 (entB) probable enterotoxin Enterotoxin (CVF414)	Clostridium perfringens str. 13
scaffold_47683_1	118	VFG012163	445	1.7e-33	66.7	VFG012163 (hlyB) probable hemolysin Hemolysin (CVF417)	Clostridium perfringens str. 13
scaffold_49512_1	142	VFG002281	1127	1.3e-51	68.3	VFG002281 (nagL) hyaluronidase mu-toxin (VF0389)	Clostridium perfringens str. 13
scaffold_51426_1	49	VFG012149	549	4.8e-19	81.3	VFG012149 (entB) probable enterotoxin Enterotoxin (CVF414)	Clostridium perfringens str. 13
scaffold_58934_1	127	VFG042830	350	1.1e-57	85.8	VFG042830 (pilT) twitching motility protein PilT type IV pili (AI109)	Clostridium perfringens str. 13
scaffold_59314_1	127	VFG042830	350	2.5e-43	66.9	VFG042830 (pilT) twitching motility protein PilT type IV pili (AI109)	Clostridium perfringens str. 13
scaffold_59947_2	67	VFG002279	1001	6.2e-17	74.1	VFG002279 (nagJ) hyaluronidase mu-toxin (VF0389)	Clostridium perfringens str. 13
scaffold_61200_1	123	VFG042830	350	3.6e-47	73.0	VFG042830 (pilT) twitching motility protein PilT type IV pili (AI109)	Clostridium perfringens str. 13
scaffold_62120_1	72	VFG002281	1127	1.8e-25	64.8	VFG002281 (nagL) hyaluronidase mu-toxin (VF0389)	Clostridium perfringens str. 13
scaffold_71265_1	110	VFG042830	350	9.5e-31	61.8	VFG042830 (pilT) twitching motility protein PilT type IV pili (AI109)	Clostridium perfringens str. 13
scaffold_72217_1	109	VFG002281	1127	3.7e-43	75.0	VFG002281 (nagL) hyaluronidase mu-toxin (VF0389)	Clostridium perfringens str. 13
scaffold_72225_1	109	VFG002281	1127	1.1e-28	60.0	VFG002281 (nagL) hyaluronidase mu-toxin (VF0389)	Clostridium perfringens str. 13
scaffold_79092_1	99	VFG002279	1001	6.1e-53	99.0	VFG002279 (nagJ) hyaluronidase mu-toxin (VF0389)	Clostridium perfringens str. 13
scaffold_82405_1	42	VFG002282	524	1.4e-19	100.0	VFG002282 (cloSI) alpha-clostripain alpha-clostripain (VF0390)	Clostridium perfringens str. 13
scaffold_82877_1	35	VFG012106	575	2.2e-13	100.0	VFG012106 (fbpB) probable fibronectin-binding protein Fibronectin-binding protein (AI157)	Clostridium perfringens str. 13
scaffold_44393_1	152	VFG012180	272	3.3e-42	60.1	VFG012180 (CTC01574) hemolysin Hemolysin (CVF417)	Clostridium tetani E88
scaffold_3_120	539	VFG012103	541	9.2e-196	66.3	VFG012103 (groEL) chaperonin GroEL GroEL (CVF403)	Clostridium thermocellum ATCC 27405
scaffold_85_6	538	VFG012103	541	2.4e-188	62.8	VFG012103 (groEL) chaperonin GroEL GroEL (CVF403)	Clostridium thermocellum ATCC 27405
scaffold_1358_6	543	VFG012103	541	1.5e-182	63.1	VFG012103 (groEL) chaperonin GroEL GroEL (CVF403)	Clostridium thermocellum ATCC 27405
scaffold_21577_2	156	VFG012103	541	9.6e-45	63.9	VFG012103 (groEL) chaperonin GroEL GroEL (CVF403)	Clostridium thermocellum ATCC 27405
scaffold_42604_1	134	VFG012103	541	2.0e-38	64.1	VFG012103 (groEL) chaperonin GroEL GroEL (CVF403)	Clostridium thermocellum ATCC 27405
scaffold_51412_1	139	VFG012103	541	3.6e-51	73.4	VFG012103 (groEL) chaperonin GroEL GroEL (CVF403)	Clostridium thermocellum ATCC 27405
scaffold_51416_1	139	VFG012103	541	1.4e-50	72.7	VFG012103 (groEL) chaperonin GroEL GroEL (CVF403)	Clostridium thermocellum ATCC 27405
scaffold_57232_1	94	VFG012103	541	5.2e-38	78.7	VFG012103 (groEL) chaperonin GroEL GroEL (CVF403)	Clostridium thermocellum ATCC 27405
scaffold_62251_1	122	VFG012103	541	1.2e-34	63.1	VFG012103 (groEL) chaperonin GroEL GroEL (CVF403)	Clostridium thermocellum ATCC 27405
scaffold_1349_6	248	VFG039536	244	9.2e-82	61.3	VFG039536 (CBU_1566) Coxiella Dot/Icm type IVB secretion system translocated effector T4SS effectors (CVF803)	Coxiella burnetii RSA 493
scaffold_12112_1	142	VFG039536	244	3.0e-53	69.7	VFG039536 (CBU_1566) Coxiella Dot/Icm type IVB secretion system translocated effector T4SS effectors (CVF803)	Coxiella burnetii RSA 493
scaffold_47614_1	145	VFG039282	406	3.6e-46	63.2	VFG039282 (CBU_0270) Coxiella Dot/Icm type IVB secretion system translocated effector, trans-2-enoyl-CoA reductase T4SS effectors (CVF803)	Coxiella burnetii RSA 493
scaffold_58841_1	127	VFG039536	244	1.2e-40	66.4	VFG039536 (CBU_1566) Coxiella Dot/Icm type IVB secretion system translocated effector T4SS effectors (CVF803)	Coxiella burnetii RSA 493
scaffold_43681_1	153	VFG042934	564	1.7e-38	68.8	VFG042934 (fimN) type IV fimbrial biogenesis nucleotide binding protein FimN type IV pili (AI117)	Dichelobacter nodosus VCS1703A
scaffold_68868_1	113	VFG042934	564	1.2e-31	64.3	VFG042934 (fimN) type IV fimbrial biogenesis nucleotide binding protein FimN type IV pili (AI117)	Dichelobacter nodosus VCS1703A
scaffold_43215_1	154	VFG042997	398	6.9e-80	96.1	VFG042997 (srt1) Srt1 Bee (biofilm enhancer in enterococci) (AI134)	Enterococcus faecalis str. E99
scaffold_70312_2	90	VFG042998	373	1.4e-40	95.6	VFG042998 (srt2) Srt2 Bee (biofilm enhancer in enterococci) (AI134)	Enterococcus faecalis str. E99
scaffold_64736_1	59	VFG002197	336	4.5e-11	60.0	VFG002197 (bopD) sugar-binding transcriptional regulator, LacI family BopD (VF0362)	Enterococcus faecalis V583
scaffold_12396_1	57	VFG045688	270	3.0e-12	63.8	VFG045688 (uppS) undecaprenyl diphosphate synthase Capsule (CVF618)	Enterococcus faecium Aus0004
scaffold_79886_1	89	VFG045688	270	2.9e-22	63.4	VFG045688 (uppS) undecaprenyl diphosphate synthase Capsule (CVF618)	Enterococcus faecium Aus0004
scaffold_1394_3	286	VFG012582	285	7.5e-120	77.7	VFG012582 (sitC) iron transport protein, inner membrane component Iron/managanease transport (CVF459)	Escherichia coli 536
scaffold_16011_1	69	VFG012572	304	2.6e-18	72.7	VFG012572 (sitA) iron transport protein, periplasmic-binding protein Iron/managanease transport (CVF459)	Escherichia coli 536
scaffold_37896_1	135	VFG012572	304	4.1e-52	80.2	VFG012572 (sitA) iron transport protein, periplasmic-binding protein Iron/managanease transport (CVF459)	Escherichia coli 536
scaffold_14010_2	132	VFG035190	888	1.2e-51	75.0	VFG035190 (EC55989_3334) chaperone clpB SCI-I T6SS (CVF734)	Escherichia coli 55989
scaffold_1394_5	327	VFG012575	304	2.7e-121	73.2	VFG012575 (sitA) SitA Iron/managanease transport (CVF459)	Escherichia coli APEC O1
scaffold_5728_2	307	VFG012575	304	1.4e-119	70.7	VFG012575 (sitA) SitA Iron/managanease transport (CVF459)	Escherichia coli APEC O1
scaffold_72018_1	109	VFG036043	1165	1.0e-53	89.0	VFG036043 (aatA) hypothetical protein AatA, AIDA-I type (CVF749)	Escherichia coli APEC O1
scaffold_81106_1	76	VFG012575	304	1.6e-16	61.8	VFG012575 (sitA) SitA Iron/managanease transport (CVF459)	Escherichia coli APEC O1
scaffold_5253_1	72	VFG012581	285	1.2e-21	73.5	VFG012581 (sitC) SitC protein Iron/managanease transport (CVF459)	Escherichia coli CFT073
scaffold_38546_1	107	VFG044159	400	4.1e-63	97.2	VFG044159 (fes) enterobactin/ferric enterobactin esterase enterobactin (IA019)	Escherichia coli CFT073
scaffold_44364_2	47	VFG000926	338	5.1e-18	100.0	VFG000926 (fepD) ferrienterobactin ABC transporter permease Enterobactin (VF0228)	Escherichia coli CFT073
scaffold_54883_1	132	VFG000923	746	7.5e-75	100.0	VFG000923 (fepA) ferrienterobactin outer membrane transporter Enterobactin (VF0228)	Escherichia coli CFT073
scaffold_58293_1	68	VFG000927	377	1.4e-29	89.6	VFG000927 (fepE) ferric enterobactin transport protein FepE Enterobactin (VF0228)	Escherichia coli CFT073
scaffold_58593_1	105	VFG000879	303	3.8e-53	100.0	VFG000879 (fimH) FimH protein precursor Type 1 fimbriae (VF0221)	Escherichia coli CFT073
scaffold_59445_2	66	VFG044165	416	8.2e-30	100.0	VFG044165 (entS) enterobactin exporter, iron-regulated enterobactin (IA019)	Escherichia coli CFT073
scaffold_60552_1	93	VFG000871	200	8.2e-52	100.0	VFG000871 (fimB) Type 1 fimbriae Regulatory protein fimB Type 1 fimbriae (VF0221)	Escherichia coli CFT073
scaffold_64565_1	86	VFG000932	536	3.1e-45	100.0	VFG000932 (entE) 2,3-dihydroxybenzoate-AMP ligase component of enterobactin synthase multienzyme complex Enterobactin (VF0228)	Escherichia coli CFT073
scaffold_71008_1	110	VFG034686	577	4.7e-54	100.0	VFG034686 (ibeC) hypothetical protein Invasion of brain endothelial cells (Ibes) (CVF429)	Escherichia coli CFT073
scaffold_72727_2	88	VFG012581	285	8.1e-41	89.8	VFG012581 (sitC) SitC protein Iron/managanease transport (CVF459)	Escherichia coli CFT073
scaffold_73756_1	107	VFG000872	198	3.0e-58	100.0	VFG000872 (fimE) Type 1 fimbriae Regulatory protein fimE Type 1 fimbriae (VF0221)	Escherichia coli CFT073
scaffold_75386_1	44	VFG000925	271	3.9e-20	100.0	VFG000925 (fepC) ferrienterobactin ABC transporter ATPase Enterobactin (VF0228)	Escherichia coli CFT073
scaffold_81229_1	96	VFG012581	285	1.4e-33	70.8	VFG012581 (sitC) SitC protein Iron/managanease transport (CVF459)	Escherichia coli CFT073
scaffold_297_10	425	VFG040953	407	8.4e-152	69.8	VFG040953 (gspF) general secretion pathway protein F gsp (SS206)	Escherichia coli E24377A
scaffold_297_11	530	VFG040954	497	6.3e-213	76.1	VFG040954 (gspE) general secretory pathway protein E gsp (SS206)	Escherichia coli E24377A
scaffold_297_12	694	VFG040955	686	2.1e-301	81.6	VFG040955 (gspD) general secretion pathway protein D gsp (SS206)	Escherichia coli E24377A
scaffold_352_5	408	VFG040953	407	9.0e-135	63.6	VFG040953 (gspF) general secretion pathway protein F gsp (SS206)	Escherichia coli E24377A
scaffold_352_7	685	VFG040955	686	3.5e-272	71.7	VFG040955 (gspD) general secretion pathway protein D gsp (SS206)	Escherichia coli E24377A
scaffold_61615_1	123	VFG034419	195	4.4e-61	100.0	VFG034419 (ecpA) fimbrillin MatB E. coli common pilus (ECP) (CVF625)	Escherichia coli E24377A
scaffold_63820_1	120	VFG035195	881	7.4e-29	60.2	VFG035195 (EcE24377A_3129) ClpA/ClpB family protein SCI-I T6SS (CVF734)	Escherichia coli E24377A
scaffold_68358_1	56	VFG040950	123	5.4e-22	100.0	VFG040950 (gspI) general secretion pathway protein I gsp (SS206)	Escherichia coli E24377A
scaffold_68358_2	59	VFG040951	187	6.2e-29	100.0	VFG040951 (gspH) general secretion pathway protein H gsp (SS206)	Escherichia coli E24377A
scaffold_43591_1	91	VFG033256	241	1.5e-45	100.0	VFG033256 (fimC) chaperone FimC, periplasmic Type I fimbriae (CVF426)	Escherichia coli O103:H2 str. 12009
scaffold_72706_1	108	VFG035981	1327	7.8e-54	94.4	VFG035981 (ehaA) AidA-I adhesin-like protein EhaA, AIDA-I type (CVF743)	Escherichia coli O103:H2 str. 12009
scaffold_33477_1	182	VFG033280	883	1.1e-89	90.7	VFG033280 (fimD) fimbrial outer membrane usher protein Type I fimbriae (CVF426)	Escherichia coli O104:H4 str. 2009EL-2050
scaffold_73642_1	107	VFG034556	1417	3.1e-50	100.0	VFG034556 (eaeH) adhesin EaeH (CVF679)	Escherichia coli O104:H4 str. 2009EL-2050
scaffold_76721_1	69	VFG035545	247	7.8e-31	100.0	VFG035545 (aec28) hypothetical protein ACE T6SS (CVF736)	Escherichia coli O104:H4 str. 2009EL-2050
scaffold_36409_1	173	VFG035844	702	2.7e-104	100.0	VFG035844 (aec15) VgrE protein ACE T6SS (CVF736)	Escherichia coli O111:H- str. 11128
scaffold_61608_1	123	VFG035844	702	3.9e-65	100.0	VFG035844 (aec15) VgrE protein ACE T6SS (CVF736)	Escherichia coli O111:H- str. 11128
scaffold_333_2	1018	VFG000846	898	0.0e+00	66.2	VFG000846 (stcE) metalloprotease StcE (VF0209)	Escherichia coli O157:H7 str. EDL933
scaffold_24513_1	205	VFG043082	313	5.2e-107	99.5	VFG043082 (flgJ) flagellar rod assembly protein/muramidase FlgJ peritrichous flagella (AI140)	Escherichia coli O157:H7 str. EDL933
scaffold_28932_1	112	VFG043075	134	4.6e-57	100.0	VFG043075 (flgC) flagellar basal body rod protein FlgC peritrichous flagella (AI140)	Escherichia coli O157:H7 str. EDL933
scaffold_28932_2	88	VFG043074	138	5.6e-42	98.9	VFG043074 (flgB) flagellar basal body rod protein FlgB peritrichous flagella (AI140)	Escherichia coli O157:H7 str. EDL933
scaffold_30372_1	57	VFG043082	313	1.5e-24	98.2	VFG043082 (flgJ) flagellar rod assembly protein/muramidase FlgJ peritrichous flagella (AI140)	Escherichia coli O157:H7 str. EDL933
scaffold_30372_2	138	VFG043081	365	2.2e-69	99.3	VFG043081 (flgI) flagellar basal body P-ring protein peritrichous flagella (AI140)	Escherichia coli O157:H7 str. EDL933
scaffold_41554_1	158	VFG043107	552	2.7e-79	98.7	VFG043107 (fliF) flagellar MS-ring protein peritrichous flagella (AI140)	Escherichia coli O157:H7 str. EDL933
scaffold_43728_1	153	VFG043108	331	2.6e-79	100.0	VFG043108 (fliG) flagellar motor switch protein G peritrichous flagella (AI140)	Escherichia coli O157:H7 str. EDL933
scaffold_49750_2	39	VFG043072	138	2.9e-14	100.0	VFG043072 (flgN) flagella synthesis protein FlgN peritrichous flagella (AI140)	Escherichia coli O157:H7 str. EDL933
scaffold_51466_1	113	VFG043088	214	1.2e-57	100.0	VFG043088 (cheZ) chemotaxis regulator CheZ peritrichous flagella (AI140)	Escherichia coli O157:H7 str. EDL933
scaffold_52638_1	137	VFG035941	1588	4.2e-60	97.1	VFG035941 (upaG/ehaG) adhesin UpaG adhesin, trimeric AT (CVF740)	Escherichia coli O157:H7 str. EDL933
scaffold_61345_1	123	VFG035710	616	7.0e-67	100.0	VFG035710 (Z0260) hypothetical protein EHS (SS185)	Escherichia coli O157:H7 str. EDL933
scaffold_62192_1	35	VFG034543	1417	8.0e-16	100.0	VFG034543 (eaeH) adhesin EaeH (CVF679)	Escherichia coli O157:H7 str. EDL933
scaffold_63807_1	36	VFG043109	228	8.2e-16	100.0	VFG043109 (fliH) flagellar assembly protein H peritrichous flagella (AI140)	Escherichia coli O157:H7 str. EDL933
scaffold_63807_2	85	VFG043110	457	5.4e-42	98.8	VFG043110 (fliI) flagellum-specific ATP synthase peritrichous flagella (AI140)	Escherichia coli O157:H7 str. EDL933
scaffold_64194_1	119	VFG043087	382	4.1e-64	98.3	VFG043087 (flhB) flagellar biosynthesis protein FlhB peritrichous flagella (AI140)	Escherichia coli O157:H7 str. EDL933
scaffold_70977_2	58	VFG042727	129	5.5e-30	100.0	VFG042727 (csgE) curli assembly protein CsgE curli fibers (AI093)	Escherichia coli O157:H7 str. EDL933
scaffold_74666_1	105	VFG043080	232	1.4e-52	100.0	VFG043080 (flgH) flagellar basal body L-ring protein peritrichous flagella (AI140)	Escherichia coli O157:H7 str. EDL933
scaffold_43689_1	145	VFG042095	210	3.6e-78	100.0	VFG042095 (ECs3712) hypothetical protein ETT2 (SS017)	Escherichia coli O157:H7 str. Sakai
scaffold_68383_1	79	VFG042092	244	2.3e-39	97.5	VFG042092 (eprK) EprK ETT2 (SS017)	Escherichia coli O157:H7 str. Sakai
scaffold_78476_1	100	VFG042087	244	2.3e-47	99.0	VFG042087 (eprH) EprH ETT2 (SS017)	Escherichia coli O157:H7 str. Sakai
scaffold_1394_2	278	VFG034233	284	1.9e-83	63.3	VFG034233 (sitD) iron ABC transporter permease Iron/managanease transport (CVF459)	Escherichia coli O44:H18 042
scaffold_5253_2	278	VFG034233	284	3.1e-86	61.2	VFG034233 (sitD) iron ABC transporter permease Iron/managanease transport (CVF459)	Escherichia coli O44:H18 042
scaffold_5728_3	110	VFG034207	275	1.8e-37	77.6	VFG034207 (sitB) iron ABC transporter ATP-binding protein Iron/managanease transport (CVF459)	Escherichia coli O44:H18 042
scaffold_16011_2	240	VFG034207	275	1.6e-91	76.0	VFG034207 (sitB) iron ABC transporter ATP-binding protein Iron/managanease transport (CVF459)	Escherichia coli O44:H18 042
scaffold_46373_1	148	VFG034233	284	4.7e-41	60.1	VFG034233 (sitD) iron ABC transporter permease Iron/managanease transport (CVF459)	Escherichia coli O44:H18 042
scaffold_186_2	293	VFG043545	294	6.9e-113	70.5	VFG043545 (ECS88_3547) lipoprotein NlpI NlpI (AI331)	Escherichia coli O45:K1:H7 str. S88
scaffold_52783_1	57	VFG043545	294	2.8e-26	100.0	VFG043545 (ECS88_3547) lipoprotein NlpI NlpI (AI331)	Escherichia coli O45:K1:H7 str. S88
scaffold_33290_1	133	VFG034566	1418	2.5e-70	99.2	VFG034566 (eaeH) putative adhesin/invasin EaeH (CVF679)	Escherichia coli O78:H11:K80 str. H10407
scaffold_60599_1	100	VFG012499	725	9.9e-27	62.2	VFG012499 (iroN) IroN protein Salmochelin siderophore (CVF456)	Escherichia coli UTI89
scaffold_79998_1	98	VFG045900	866	2.5e-51	100.0	VFG045900 (elfC) putative outer membrane usher protein ElfC E.coli laminin-binding fimbriae (ELF) (CVF824)	Escherichia coli VR50
scaffold_108_16	224	VFG046612	222	1.9e-78	67.6	VFG046612 (FN3523_1292) Ribulose-phosphate 3-epimerase Capsule (CVF833)	Francisella cf. tularensis subsp. novicida 3523
scaffold_1028_6	291	VFG047041	293	3.1e-105	64.6	VFG047041 (FN3523_1478) glucose-1-phosphate thymidylyltransferase LPS (CVF834)	Francisella cf. tularensis subsp. novicida 3523
scaffold_13227_1	121	VFG047258	455	2.0e-34	62.5	VFG047258 (FN3523_0439) N-acetylglucosamine-1-phosphate uridyltransferase/glucosamine-1-phosphate N-acetyltransferase LPS (CVF834)	Francisella cf. tularensis subsp. novicida 3523
scaffold_24153_1	228	VFG046467	394	6.4e-90	68.7	VFG046467 (FN3523_1640) translation elongation factor Tu EF-Tu (CVF827)	Francisella cf. tularensis subsp. novicida 3523
scaffold_62113_1	123	VFG046467	394	1.1e-43	71.3	VFG046467 (FN3523_1640) translation elongation factor Tu EF-Tu (CVF827)	Francisella cf. tularensis subsp. novicida 3523
scaffold_62_47	268	VFG046474	394	2.6e-122	79.0	VFG046474 (OOM_0626) elongation factor EF-Tu (CVF827)	Francisella noatunensis subsp. orientalis str. Toba 04
scaffold_640_1	395	VFG046474	394	1.8e-180	77.8	VFG046474 (OOM_0626) elongation factor EF-Tu (CVF827)	Francisella noatunensis subsp. orientalis str. Toba 04
scaffold_9723_1	319	VFG046474	394	4.9e-144	76.3	VFG046474 (OOM_0626) elongation factor EF-Tu (CVF827)	Francisella noatunensis subsp. orientalis str. Toba 04
scaffold_14633_1	291	VFG046474	394	9.9e-136	79.9	VFG046474 (OOM_0626) elongation factor EF-Tu (CVF827)	Francisella noatunensis subsp. orientalis str. Toba 04
scaffold_26950_1	210	VFG046474	394	6.3e-92	76.2	VFG046474 (OOM_0626) elongation factor EF-Tu (CVF827)	Francisella noatunensis subsp. orientalis str. Toba 04
scaffold_31221_1	191	VFG046474	394	8.6e-80	74.3	VFG046474 (OOM_0626) elongation factor EF-Tu (CVF827)	Francisella noatunensis subsp. orientalis str. Toba 04
scaffold_33904_2	89	VFG046654	339	3.8e-22	60.2	VFG046654 (OOM_1609) UDP-glucose 4-epimerase Capsule (CVF833)	Francisella noatunensis subsp. orientalis str. Toba 04
scaffold_37097_2	89	VFG046654	339	3.8e-22	60.2	VFG046654 (OOM_1609) UDP-glucose 4-epimerase Capsule (CVF833)	Francisella noatunensis subsp. orientalis str. Toba 04
scaffold_44542_1	151	VFG047102	357	1.2e-52	65.3	VFG047102 (OOM_0810) WbqC-like family protein LPS (CVF834)	Francisella noatunensis subsp. orientalis str. Toba 04
scaffold_49328_1	142	VFG047717	1094	1.2e-46	64.8	VFG047717 (OOM_0012) carbamoyl phosphate synthase large subunit Pyrimidine biosynthesis (CVF845)	Francisella noatunensis subsp. orientalis str. Toba 04
scaffold_56395_1	131	VFG047717	1094	7.5e-43	63.1	VFG047717 (OOM_0012) carbamoyl phosphate synthase large subunit Pyrimidine biosynthesis (CVF845)	Francisella noatunensis subsp. orientalis str. Toba 04
scaffold_56828_1	130	VFG047717	1094	6.8e-44	63.8	VFG047717 (OOM_0012) carbamoyl phosphate synthase large subunit Pyrimidine biosynthesis (CVF845)	Francisella noatunensis subsp. orientalis str. Toba 04
scaffold_60443_1	125	VFG047717	1094	1.3e-47	69.6	VFG047717 (OOM_0012) carbamoyl phosphate synthase large subunit Pyrimidine biosynthesis (CVF845)	Francisella noatunensis subsp. orientalis str. Toba 04
scaffold_65692_1	118	VFG047717	1094	7.1e-32	60.7	VFG047717 (OOM_0012) carbamoyl phosphate synthase large subunit Pyrimidine biosynthesis (CVF845)	Francisella noatunensis subsp. orientalis str. Toba 04
scaffold_75112_1	105	VFG047717	1094	2.4e-31	61.9	VFG047717 (OOM_0012) carbamoyl phosphate synthase large subunit Pyrimidine biosynthesis (CVF845)	Francisella noatunensis subsp. orientalis str. Toba 04
scaffold_78901_1	86	VFG047048	296	6.5e-27	63.1	VFG047048 (OOM_0780) ornithine cyclodeaminase LPS (CVF834)	Francisella noatunensis subsp. orientalis str. Toba 04
scaffold_81069_1	86	VFG047048	296	6.5e-27	63.1	VFG047048 (OOM_0780) ornithine cyclodeaminase LPS (CVF834)	Francisella noatunensis subsp. orientalis str. Toba 04
scaffold_707_10	205	VFG047304	209	2.1e-68	61.9	VFG047304 (wbtP) galactosyl transferase LPS (CVF834)	Francisella novicida U112
scaffold_1299_1	398	VFG046458	394	8.7e-175	75.1	VFG046458 (tufA) elongation factor Tu EF-Tu (CVF827)	Francisella novicida U112
scaffold_3384_4	325	VFG047143	324	1.7e-115	61.3	VFG047143 (wbtF) NAD dependent epimerase LPS (CVF834)	Francisella novicida U112
scaffold_6008_1	346	VFG046458	394	6.4e-150	74.3	VFG046458 (tufA) elongation factor Tu EF-Tu (CVF827)	Francisella novicida U112
scaffold_13740_2	338	VFG046458	394	1.2e-137	75.5	VFG046458 (tufA) elongation factor Tu EF-Tu (CVF827)	Francisella novicida U112
scaffold_22938_1	205	VFG046458	394	2.1e-79	66.7	VFG046458 (tufA) elongation factor Tu EF-Tu (CVF827)	Francisella novicida U112
scaffold_27636_2	164	VFG047304	209	8.5e-44	63.1	VFG047304 (wbtP) galactosyl transferase LPS (CVF834)	Francisella novicida U112
scaffold_49519_1	142	VFG046458	394	9.0e-50	64.5	VFG046458 (tufA) elongation factor Tu EF-Tu (CVF827)	Francisella novicida U112
scaffold_54015_1	95	VFG047701	1094	5.0e-36	72.3	VFG047701 (carB) carbamoyl phosphate synthase large subunit Pyrimidine biosynthesis (CVF845)	Francisella novicida U112
scaffold_59912_1	68	VFG047701	1094	2.0e-23	72.1	VFG047701 (carB) carbamoyl phosphate synthase large subunit Pyrimidine biosynthesis (CVF845)	Francisella novicida U112
scaffold_74610_1	106	VFG047304	209	3.1e-39	68.9	VFG047304 (wbtP) galactosyl transferase LPS (CVF834)	Francisella novicida U112
scaffold_130_64	58	VFG046459	394	1.3e-18	77.2	VFG046459 (Fphi_1039) elongation factor Tu EF-Tu (CVF827)	Francisella philomiragia subsp. philomiragia ATCC 25017
scaffold_147_1	58	VFG046459	394	1.3e-18	77.2	VFG046459 (Fphi_1039) elongation factor Tu EF-Tu (CVF827)	Francisella philomiragia subsp. philomiragia ATCC 25017
scaffold_1630_1	169	VFG046459	394	1.7e-79	82.8	VFG046459 (Fphi_1039) elongation factor Tu EF-Tu (CVF827)	Francisella philomiragia subsp. philomiragia ATCC 25017
scaffold_2114_4	398	VFG046459	394	2.2e-170	72.8	VFG046459 (Fphi_1039) elongation factor Tu EF-Tu (CVF827)	Francisella philomiragia subsp. philomiragia ATCC 25017
scaffold_3475_1	45	VFG046639	339	2.0e-11	64.4	VFG046639 (Fphi_1469) UDP-glucose 4-epimerase Capsule (CVF833)	Francisella philomiragia subsp. philomiragia ATCC 25017
scaffold_3923_1	398	VFG046459	394	1.1e-174	75.1	VFG046459 (Fphi_1039) elongation factor Tu EF-Tu (CVF827)	Francisella philomiragia subsp. philomiragia ATCC 25017
scaffold_4320_2	227	VFG046459	394	4.7e-101	78.4	VFG046459 (Fphi_1039) elongation factor Tu EF-Tu (CVF827)	Francisella philomiragia subsp. philomiragia ATCC 25017
scaffold_4756_2	226	VFG046604	222	1.1e-76	65.8	VFG046604 (Fphi_1467) ribulose-phosphate 3-epimerase Capsule (CVF833)	Francisella philomiragia subsp. philomiragia ATCC 25017
scaffold_10401_1	88	VFG046459	394	8.4e-38	81.8	VFG046459 (Fphi_1039) elongation factor Tu EF-Tu (CVF827)	Francisella philomiragia subsp. philomiragia ATCC 25017
scaffold_11141_1	400	VFG046459	394	1.1e-169	72.5	VFG046459 (Fphi_1039) elongation factor Tu EF-Tu (CVF827)	Francisella philomiragia subsp. philomiragia ATCC 25017
scaffold_11873_1	277	VFG046459	394	5.5e-120	76.5	VFG046459 (Fphi_1039) elongation factor Tu EF-Tu (CVF827)	Francisella philomiragia subsp. philomiragia ATCC 25017
scaffold_15273_1	195	VFG046604	222	1.6e-68	67.0	VFG046604 (Fphi_1467) ribulose-phosphate 3-epimerase Capsule (CVF833)	Francisella philomiragia subsp. philomiragia ATCC 25017
scaffold_15809_1	310	VFG046459	394	1.2e-152	83.5	VFG046459 (Fphi_1039) elongation factor Tu EF-Tu (CVF827)	Francisella philomiragia subsp. philomiragia ATCC 25017
scaffold_17714_2	226	VFG046604	222	5.2e-76	65.8	VFG046604 (Fphi_1467) ribulose-phosphate 3-epimerase Capsule (CVF833)	Francisella philomiragia subsp. philomiragia ATCC 25017
scaffold_18564_1	214	VFG047702	1094	1.9e-83	68.2	VFG047702 (carB) carbamoyl phosphate synthase large subunit Pyrimidine biosynthesis (CVF845)	Francisella philomiragia subsp. philomiragia ATCC 25017
scaffold_25182_1	220	VFG046459	394	4.1e-102	79.9	VFG046459 (Fphi_1039) elongation factor Tu EF-Tu (CVF827)	Francisella philomiragia subsp. philomiragia ATCC 25017
scaffold_26607_2	147	VFG047594	581	5.3e-29	60.4	VFG047594 (Fphi_0050) gamma-glutamyltransferase Cysteine acquisition (CVF840)	Francisella philomiragia subsp. philomiragia ATCC 25017
scaffold_40042_1	162	VFG047702	1094	3.8e-52	60.7	VFG047702 (carB) carbamoyl phosphate synthase large subunit Pyrimidine biosynthesis (CVF845)	Francisella philomiragia subsp. philomiragia ATCC 25017
scaffold_41617_1	153	VFG046459	394	5.3e-72	85.6	VFG046459 (Fphi_1039) elongation factor Tu EF-Tu (CVF827)	Francisella philomiragia subsp. philomiragia ATCC 25017
scaffold_43910_1	145	VFG046459	394	3.1e-61	76.4	VFG046459 (Fphi_1039) elongation factor Tu EF-Tu (CVF827)	Francisella philomiragia subsp. philomiragia ATCC 25017
scaffold_46521_1	91	VFG046604	222	2.3e-30	68.6	VFG046604 (Fphi_1467) ribulose-phosphate 3-epimerase Capsule (CVF833)	Francisella philomiragia subsp. philomiragia ATCC 25017
scaffold_46819_1	147	VFG047702	1094	1.1e-47	65.7	VFG047702 (carB) carbamoyl phosphate synthase large subunit Pyrimidine biosynthesis (CVF845)	Francisella philomiragia subsp. philomiragia ATCC 25017
scaffold_49341_1	142	VFG047215	586	2.3e-45	67.1	VFG047215 (Fphi_1243) dTDP-glucose 4,6-dehydratase LPS (CVF834)	Francisella philomiragia subsp. philomiragia ATCC 25017
scaffold_49657_1	141	VFG047702	1094	1.3e-48	62.7	VFG047702 (carB) carbamoyl phosphate synthase large subunit Pyrimidine biosynthesis (CVF845)	Francisella philomiragia subsp. philomiragia ATCC 25017
scaffold_49772_1	133	VFG046459	394	6.9e-60	83.5	VFG046459 (Fphi_1039) elongation factor Tu EF-Tu (CVF827)	Francisella philomiragia subsp. philomiragia ATCC 25017
scaffold_50282_1	141	VFG047702	1094	8.7e-45	60.6	VFG047702 (carB) carbamoyl phosphate synthase large subunit Pyrimidine biosynthesis (CVF845)	Francisella philomiragia subsp. philomiragia ATCC 25017
scaffold_50671_1	139	VFG046459	394	7.2e-68	83.3	VFG046459 (Fphi_1039) elongation factor Tu EF-Tu (CVF827)	Francisella philomiragia subsp. philomiragia ATCC 25017
scaffold_52214_1	137	VFG046459	394	2.9e-61	79.4	VFG046459 (Fphi_1039) elongation factor Tu EF-Tu (CVF827)	Francisella philomiragia subsp. philomiragia ATCC 25017
scaffold_52411_1	110	VFG046459	394	4.7e-46	83.3	VFG046459 (Fphi_1039) elongation factor Tu EF-Tu (CVF827)	Francisella philomiragia subsp. philomiragia ATCC 25017
scaffold_52678_1	136	VFG047702	1094	1.2e-46	73.4	VFG047702 (carB) carbamoyl phosphate synthase large subunit Pyrimidine biosynthesis (CVF845)	Francisella philomiragia subsp. philomiragia ATCC 25017
scaffold_53906_1	135	VFG047702	1094	9.2e-52	76.7	VFG047702 (carB) carbamoyl phosphate synthase large subunit Pyrimidine biosynthesis (CVF845)	Francisella philomiragia subsp. philomiragia ATCC 25017
scaffold_61735_1	123	VFG046459	394	1.3e-60	87.8	VFG046459 (Fphi_1039) elongation factor Tu EF-Tu (CVF827)	Francisella philomiragia subsp. philomiragia ATCC 25017
scaffold_64030_1	120	VFG047702	1094	1.4e-40	60.5	VFG047702 (carB) carbamoyl phosphate synthase large subunit Pyrimidine biosynthesis (CVF845)	Francisella philomiragia subsp. philomiragia ATCC 25017
scaffold_68741_1	114	VFG047702	1094	8.6e-35	60.0	VFG047702 (carB) carbamoyl phosphate synthase large subunit Pyrimidine biosynthesis (CVF845)	Francisella philomiragia subsp. philomiragia ATCC 25017
scaffold_70891_1	110	VFG046459	394	1.8e-42	74.5	VFG046459 (Fphi_1039) elongation factor Tu EF-Tu (CVF827)	Francisella philomiragia subsp. philomiragia ATCC 25017
scaffold_72135_1	109	VFG046604	222	5.3e-34	70.5	VFG046604 (Fphi_1467) ribulose-phosphate 3-epimerase Capsule (CVF833)	Francisella philomiragia subsp. philomiragia ATCC 25017
scaffold_72415_1	108	VFG046459	394	7.1e-47	75.9	VFG046459 (Fphi_1039) elongation factor Tu EF-Tu (CVF827)	Francisella philomiragia subsp. philomiragia ATCC 25017
scaffold_74640_1	96	VFG046604	222	2.6e-32	69.2	VFG046604 (Fphi_1467) ribulose-phosphate 3-epimerase Capsule (CVF833)	Francisella philomiragia subsp. philomiragia ATCC 25017
scaffold_78153_1	101	VFG046459	394	1.9e-38	86.7	VFG046459 (Fphi_1039) elongation factor Tu EF-Tu (CVF827)	Francisella philomiragia subsp. philomiragia ATCC 25017
scaffold_81748_1	82	VFG046459	394	3.9e-37	84.1	VFG046459 (Fphi_1039) elongation factor Tu EF-Tu (CVF827)	Francisella philomiragia subsp. philomiragia ATCC 25017
scaffold_81752_1	81	VFG046459	394	5.2e-34	79.0	VFG046459 (Fphi_1039) elongation factor Tu EF-Tu (CVF827)	Francisella philomiragia subsp. philomiragia ATCC 25017
scaffold_17_95	396	VFG046475	394	2.0e-163	68.8	VFG046475 (F7308_0636) translation elongation factor Tu EF-Tu (CVF827)	Francisella sp. TX077308
scaffold_13723_1	239	VFG046475	394	1.4e-106	76.4	VFG046475 (F7308_0636) translation elongation factor Tu EF-Tu (CVF827)	Francisella sp. TX077308
scaffold_18817_1	273	VFG046475	394	1.6e-111	67.8	VFG046475 (F7308_0636) translation elongation factor Tu EF-Tu (CVF827)	Francisella sp. TX077308
scaffold_21547_1	64	VFG046475	394	1.5e-23	78.1	VFG046475 (F7308_0636) translation elongation factor Tu EF-Tu (CVF827)	Francisella sp. TX077308
scaffold_46039_1	149	VFG046475	394	2.3e-56	67.8	VFG046475 (F7308_0636) translation elongation factor Tu EF-Tu (CVF827)	Francisella sp. TX077308
scaffold_52349_1	137	VFG047718	1094	1.5e-41	63.6	VFG047718 (F7308_0021) carbamoyl-phosphate synthase large chain Pyrimidine biosynthesis (CVF845)	Francisella sp. TX077308
scaffold_57002_1	130	VFG046620	222	4.3e-38	60.5	VFG046620 (F7308_1109) Ribulose-phosphate 3-epimerase Capsule (CVF833)	Francisella sp. TX077308
scaffold_77315_1	102	VFG047144	327	3.3e-38	74.5	VFG047144 (wbtF) NAD dependent epimerase/dehydratase family protein LPS (CVF834)	Francisella tularensis subsp. holarctica FTNF002-00
scaffold_62301_2	67	VFG047706	1094	1.2e-25	77.6	VFG047706 (carB) carbamoyl phosphate synthase large subunit Pyrimidine biosynthesis (CVF845)	Francisella tularensis subsp. mediasiatica FSC147
scaffold_62_46	67	VFG046465(gb|YP_169203.1)	394	1.9e-13	70.8	VFG046465(gb|YP_169203.1) (tufA) elongation factor Tu EF-Tu (VF0460)	Francisella tularensis subsp. tularensis SCHU S4
scaffold_397_31	37	VFG046465(gb|YP_169203.1)	394	4.3e-12	88.9	VFG046465(gb|YP_169203.1) (tufA) elongation factor Tu EF-Tu (VF0460)	Francisella tularensis subsp. tularensis SCHU S4
scaffold_425_14	28	VFG046465(gb|YP_169203.1)	394	4.7e-11	96.4	VFG046465(gb|YP_169203.1) (tufA) elongation factor Tu EF-Tu (VF0460)	Francisella tularensis subsp. tularensis SCHU S4
scaffold_486_12	37	VFG046465(gb|YP_169203.1)	394	9.7e-12	91.4	VFG046465(gb|YP_169203.1) (tufA) elongation factor Tu EF-Tu (VF0460)	Francisella tularensis subsp. tularensis SCHU S4
scaffold_766_1	49	VFG046465(gb|YP_169203.1)	394	1.0e-13	70.8	VFG046465(gb|YP_169203.1) (tufA) elongation factor Tu EF-Tu (VF0460)	Francisella tularensis subsp. tularensis SCHU S4
scaffold_906_1	34	VFG046465(gb|YP_169203.1)	394	2.3e-12	93.9	VFG046465(gb|YP_169203.1) (tufA) elongation factor Tu EF-Tu (VF0460)	Francisella tularensis subsp. tularensis SCHU S4
scaffold_984_1	28	VFG046465(gb|YP_169203.1)	394	4.7e-11	96.4	VFG046465(gb|YP_169203.1) (tufA) elongation factor Tu EF-Tu (VF0460)	Francisella tularensis subsp. tularensis SCHU S4
scaffold_1409_13	67	VFG046465(gb|YP_169203.1)	394	4.0e-24	75.8	VFG046465(gb|YP_169203.1) (tufA) elongation factor Tu EF-Tu (VF0460)	Francisella tularensis subsp. tularensis SCHU S4
scaffold_1790_1	67	VFG046465(gb|YP_169203.1)	394	4.0e-24	75.8	VFG046465(gb|YP_169203.1) (tufA) elongation factor Tu EF-Tu (VF0460)	Francisella tularensis subsp. tularensis SCHU S4
scaffold_3188_1	42	VFG046465(gb|YP_169203.1)	394	5.3e-14	84.6	VFG046465(gb|YP_169203.1) (tufA) elongation factor Tu EF-Tu (VF0460)	Francisella tularensis subsp. tularensis SCHU S4
scaffold_3222_6	42	VFG046465(gb|YP_169203.1)	394	5.3e-14	84.6	VFG046465(gb|YP_169203.1) (tufA) elongation factor Tu EF-Tu (VF0460)	Francisella tularensis subsp. tularensis SCHU S4
scaffold_6965_2	34	VFG046465(gb|YP_169203.1)	394	2.3e-12	93.9	VFG046465(gb|YP_169203.1) (tufA) elongation factor Tu EF-Tu (VF0460)	Francisella tularensis subsp. tularensis SCHU S4
scaffold_10857_1	43	VFG047401(gb|YP_169301.1)	747	1.0e-12	79.5	VFG047401(gb|YP_169301.1) (feoB) Fe(2+) transporter permease subunit FeoB FupA (VF0550)	Francisella tularensis subsp. tularensis SCHU S4
scaffold_13740_1	46	VFG046465(gb|YP_169203.1)	394	2.4e-12	73.3	VFG046465(gb|YP_169203.1) (tufA) elongation factor Tu EF-Tu (VF0460)	Francisella tularensis subsp. tularensis SCHU S4
scaffold_23868_2	90	VFG047095(gb|YP_170392.1)	360	2.2e-25	62.1	VFG047095(gb|YP_170392.1) (wbtI) DegT/DnrJ/EryC1/StrS family aminotransferase LPS (VF0542)	Francisella tularensis subsp. tularensis SCHU S4
scaffold_30338_2	59	VFG046465(gb|YP_169203.1)	394	3.3e-22	84.2	VFG046465(gb|YP_169203.1) (tufA) elongation factor Tu EF-Tu (VF0460)	Francisella tularensis subsp. tularensis SCHU S4
scaffold_33446_1	183	VFG046465(gb|YP_169203.1)	394	3.8e-69	66.7	VFG046465(gb|YP_169203.1) (tufA) elongation factor Tu EF-Tu (VF0460)	Francisella tularensis subsp. tularensis SCHU S4
scaffold_41948_1	34	VFG047708(gb|YP_170571.1)	1094	1.0e-12	88.2	VFG047708(gb|YP_170571.1) (carB) carbamoyl phosphate synthase large subunit Pyrimidine biosynthesis (VF0558)	Francisella tularensis subsp. tularensis SCHU S4
scaffold_42550_1	71	VFG046465(gb|YP_169203.1)	394	3.8e-25	78.9	VFG046465(gb|YP_169203.1) (tufA) elongation factor Tu EF-Tu (VF0460)	Francisella tularensis subsp. tularensis SCHU S4
scaffold_56479_1	119	VFG046465(gb|YP_169203.1)	394	2.7e-55	84.9	VFG046465(gb|YP_169203.1) (tufA) elongation factor Tu EF-Tu (VF0460)	Francisella tularensis subsp. tularensis SCHU S4
scaffold_67696_1	102	VFG046465(gb|YP_169203.1)	394	5.9e-43	78.6	VFG046465(gb|YP_169203.1) (tufA) elongation factor Tu EF-Tu (VF0460)	Francisella tularensis subsp. tularensis SCHU S4
scaffold_71706_1	98	VFG046465(gb|YP_169203.1)	394	2.2e-39	77.9	VFG046465(gb|YP_169203.1) (tufA) elongation factor Tu EF-Tu (VF0460)	Francisella tularensis subsp. tularensis SCHU S4
scaffold_81895_1	52	VFG047708(gb|YP_170571.1)	1094	1.2e-15	67.3	VFG047708(gb|YP_170571.1) (carB) carbamoyl phosphate synthase large subunit Pyrimidine biosynthesis (VF0558)	Francisella tularensis subsp. tularensis SCHU S4
scaffold_82946_1	34	VFG046465(gb|YP_169203.1)	394	8.0e-13	85.3	VFG046465(gb|YP_169203.1) (tufA) elongation factor Tu EF-Tu (VF0460)	Francisella tularensis subsp. tularensis SCHU S4
scaffold_92_32	263	VFG013393	264	7.4e-82	61.1	VFG013393 (lpxA) UDP-N-acetylglucosamine acyltransferase LOS (CVF494)	Haemophilus ducreyi 35000HP
scaffold_382_8	202	VFG013269	196	1.5e-61	60.4	VFG013269 (orfM) putative deoxyribonucleotide triphosphate pyrophosphatase LOS (CVF494)	Haemophilus ducreyi 35000HP
scaffold_1542_4	318	VFG013410	313	6.4e-128	67.8	VFG013410 (rfaD) ADP-L-glycero-D-manno-heptose-6-epimerase LOS (CVF494)	Haemophilus ducreyi 35000HP
scaffold_1619_1	216	VFG013469	286	2.9e-92	73.4	VFG013469 (kdsA) 2-dehydro-3-deoxyphosphooctonate aldolase LOS (CVF494)	Haemophilus ducreyi 35000HP
scaffold_3464_2	318	VFG013410	313	2.9e-128	67.5	VFG013410 (rfaD) ADP-L-glycero-D-manno-heptose-6-epimerase LOS (CVF494)	Haemophilus ducreyi 35000HP
scaffold_14618_2	65	VFG013302	344	8.1e-14	60.3	VFG013302 (waaQ) ADP-heptose--lipooligosaccharide heptosyltransferase III LOS (CVF494)	Haemophilus ducreyi 35000HP
scaffold_44111_1	152	VFG013516	444	8.5e-46	62.6	VFG013516 (mrsA/glmM) phosphoglucosamine mutase Exopolysaccharide (CVF495)	Haemophilus ducreyi 35000HP
scaffold_46199_1	148	VFG013469	286	9.1e-61	72.8	VFG013469 (kdsA) 2-dehydro-3-deoxyphosphooctonate aldolase LOS (CVF494)	Haemophilus ducreyi 35000HP
scaffold_49272_1	142	VFG013629	394	1.1e-44	61.1	VFG013629 (hemN) coproporphyrinogen III oxidase Heme biosynthesis (CVF506)	Haemophilus ducreyi 35000HP
scaffold_51751_1	61	VFG013422	194	1.9e-17	65.6	VFG013422 (gmhA/lpcA) phosphoheptose isomerase LOS (CVF494)	Haemophilus ducreyi 35000HP
scaffold_63305_2	64	VFG013252	582	6.1e-14	64.3	VFG013252 (msbA) ABC transporter ATP-binding protein MsbA LOS (CVF494)	Haemophilus ducreyi 35000HP
scaffold_71363_1	110	VFG013410	313	3.6e-38	66.4	VFG013410 (rfaD) ADP-L-glycero-D-manno-heptose-6-epimerase LOS (CVF494)	Haemophilus ducreyi 35000HP
scaffold_77631_1	101	VFG013410	313	2.9e-42	77.0	VFG013410 (rfaD) ADP-L-glycero-D-manno-heptose-6-epimerase LOS (CVF494)	Haemophilus ducreyi 35000HP
scaffold_0_102	551	VFG013531	563	5.9e-214	64.7	VFG013531 (pgi) glucose-6-phosphate isomerase Exopolysaccharide (CVF495)	Haemophilus influenzae 86-028NP
scaffold_186_11	446	VFG013514	445	9.7e-191	75.6	VFG013514 (mrsA/glmM) predicted phosphomannomutase Exopolysaccharide (CVF495)	Haemophilus influenzae 86-028NP
scaffold_263_17	285	VFG013466	284	1.6e-138	85.5	VFG013466 (kdsA) 2-dehydro-3-deoxyphosphooctonate aldolase LOS (CVF494)	Haemophilus influenzae 86-028NP
scaffold_619_4	260	VFG013316	254	2.0e-95	65.1	VFG013316 (lgtF) UDP-glucose--lipooligosaccharide glucosyltransferase LOS (CVF494)	Haemophilus influenzae 86-028NP
scaffold_746_6	382	VFG013626	383	1.4e-129	60.8	VFG013626 (hemN) coproporphyrinogen III oxidase Heme biosynthesis (CVF506)	Haemophilus influenzae 86-028NP
scaffold_5202_3	297	VFG013531	563	1.8e-121	68.6	VFG013531 (pgi) glucose-6-phosphate isomerase Exopolysaccharide (CVF495)	Haemophilus influenzae 86-028NP
scaffold_9745_1	431	VFG013531	563	5.9e-177	69.8	VFG013531 (pgi) glucose-6-phosphate isomerase Exopolysaccharide (CVF495)	Haemophilus influenzae 86-028NP
scaffold_23454_1	197	VFG013401	346	1.3e-59	60.0	VFG013401 (rfaF) ADP-heptose--lipooligosaccharide heptosyltransferase II LOS (CVF494)	Haemophilus influenzae 86-028NP
scaffold_37286_1	89	VFG013249	587	9.1e-24	61.4	VFG013249 (msbA) lipid A export ATP-binding protein MsbA LOS (CVF494)	Haemophilus influenzae 86-028NP
scaffold_38638_1	133	VFG013249	587	6.9e-36	61.4	VFG013249 (msbA) lipid A export ATP-binding protein MsbA LOS (CVF494)	Haemophilus influenzae 86-028NP
scaffold_39943_1	59	VFG013287	338	1.9e-17	69.5	VFG013287 (galE) UDP-glucose 4-epimerase LOS (CVF494)	Haemophilus influenzae 86-028NP
scaffold_44485_1	38	VFG013287	338	9.0e-13	83.8	VFG013287 (galE) UDP-glucose 4-epimerase LOS (CVF494)	Haemophilus influenzae 86-028NP
scaffold_51924_1	138	VFG013531	563	5.1e-58	72.5	VFG013531 (pgi) glucose-6-phosphate isomerase Exopolysaccharide (CVF495)	Haemophilus influenzae 86-028NP
scaffold_52099_1	137	VFG013249	587	1.4e-39	60.6	VFG013249 (msbA) lipid A export ATP-binding protein MsbA LOS (CVF494)	Haemophilus influenzae 86-028NP
scaffold_54382_1	91	VFG013615	323	2.6e-26	60.5	VFG013615 (hemH) ferrochelatase Heme biosynthesis (CVF506)	Haemophilus influenzae 86-028NP
scaffold_65495_1	118	VFG013466	284	1.2e-47	75.4	VFG013466 (kdsA) 2-dehydro-3-deoxyphosphooctonate aldolase LOS (CVF494)	Haemophilus influenzae 86-028NP
scaffold_92_33	391	VFG013386	390	1.1e-137	66.1	VFG013386 (lpxB) lipid-A-disaccharide synthase LOS (CVF494)	Haemophilus influenzae PittEE
scaffold_621_5	583	VFG013250	587	1.3e-224	68.6	VFG013250 (msbA) fused lipid transporter subunits of ABC superfamily: membrane component/ATP-binding component LOS (CVF494)	Haemophilus influenzae PittEE
scaffold_827_6	401	VFG013386	390	2.8e-125	60.1	VFG013386 (lpxB) lipid-A-disaccharide synthase LOS (CVF494)	Haemophilus influenzae PittEE
scaffold_979_2	303	VFG013348	295	3.1e-124	72.4	VFG013348 (galU) carbon storage regulator LOS (CVF494)	Haemophilus influenzae PittEE
scaffold_3160_1	286	VFG013250	587	3.6e-106	70.6	VFG013250 (msbA) fused lipid transporter subunits of ABC superfamily: membrane component/ATP-binding component LOS (CVF494)	Haemophilus influenzae PittEE
scaffold_9388_2	179	VFG013317	254	4.8e-64	66.1	VFG013317 (lgtF) shikimate 5-dehydrogenase LOS (CVF494)	Haemophilus influenzae PittEE
scaffold_10099_2	254	VFG013515	445	9.6e-111	77.0	VFG013515 (mrsA/glmM) predicted phosphomannomutase Exopolysaccharide (CVF495)	Haemophilus influenzae PittEE
scaffold_14675_2	57	VFG013467	284	1.4e-17	71.4	VFG013467 (kdsA) 2-dehydro-3-deoxyphosphooctonate aldolase LOS (CVF494)	Haemophilus influenzae PittEE
scaffold_28371_1	103	VFG013386	390	1.8e-31	63.1	VFG013386 (lpxB) lipid-A-disaccharide synthase LOS (CVF494)	Haemophilus influenzae PittEE
scaffold_28371_2	101	VFG013392	262	7.6e-35	68.7	VFG013392 (lpxA) UDP-N-acetylglucosamine acyltransferase LOS (CVF494)	Haemophilus influenzae PittEE
scaffold_29891_1	196	VFG013532	549	5.9e-84	72.1	VFG013532 (pgi) glucose-6-phosphate isomerase Exopolysaccharide (CVF495)	Haemophilus influenzae PittEE
scaffold_32699_1	185	VFG013250	587	1.5e-60	65.6	VFG013250 (msbA) fused lipid transporter subunits of ABC superfamily: membrane component/ATP-binding component LOS (CVF494)	Haemophilus influenzae PittEE
scaffold_37202_2	71	VFG013376	341	1.0e-22	74.6	VFG013376 (lpxD) UDP-3-O-3-hydroxymyristoyl glucosamine N-acyltransferase LOS (CVF494)	Haemophilus influenzae PittEE
scaffold_46650_1	51	VFG013515	445	2.3e-19	80.0	VFG013515 (mrsA/glmM) predicted phosphomannomutase Exopolysaccharide (CVF495)	Haemophilus influenzae PittEE
scaffold_49494_1	133	VFG013348	295	9.6e-54	82.9	VFG013348 (galU) carbon storage regulator LOS (CVF494)	Haemophilus influenzae PittEE
scaffold_58516_1	72	VFG013467	284	3.6e-31	80.6	VFG013467 (kdsA) 2-dehydro-3-deoxyphosphooctonate aldolase LOS (CVF494)	Haemophilus influenzae PittEE
scaffold_69919_1	72	VFG013376	341	9.6e-24	74.2	VFG013376 (lpxD) UDP-3-O-3-hydroxymyristoyl glucosamine N-acyltransferase LOS (CVF494)	Haemophilus influenzae PittEE
scaffold_77365_1	102	VFG013348	295	4.1e-44	81.4	VFG013348 (galU) carbon storage regulator LOS (CVF494)	Haemophilus influenzae PittEE
scaffold_126_30	194	VFG013421	194	9.0e-85	79.6	VFG013421 (gmhA/lpcA) phosphoheptose isomerase LOS (CVF494)	Haemophilus influenzae PittGG
scaffold_382_9	381	VFG013628	383	5.1e-148	65.6	VFG013628 (hemN) coproporphyrinogen III oxidase Heme biosynthesis (CVF506)	Haemophilus influenzae PittGG
scaffold_1619_3	194	VFG013421	194	5.5e-82	76.3	VFG013421 (gmhA/lpcA) phosphoheptose isomerase LOS (CVF494)	Haemophilus influenzae PittGG
scaffold_2833_2	316	VFG013409	308	1.2e-142	77.5	VFG013409 (rfaD) ADP-L-glycero-D-manno-heptose-6-epimerase LOS (CVF494)	Haemophilus influenzae PittGG
scaffold_12634_1	238	VFG013628	383	1.3e-88	66.0	VFG013628 (hemN) coproporphyrinogen III oxidase Heme biosynthesis (CVF506)	Haemophilus influenzae PittGG
scaffold_46283_1	50	VFG013533	549	3.5e-17	79.2	VFG013533 (pgi) glucose-6-phosphate isomerase Exopolysaccharide (CVF495)	Haemophilus influenzae PittGG
scaffold_53820_1	135	VFG013421	194	2.0e-54	76.3	VFG013421 (gmhA/lpcA) phosphoheptose isomerase LOS (CVF494)	Haemophilus influenzae PittGG
scaffold_54646_1	90	VFG013251	587	2.5e-21	60.9	VFG013251 (msbA) lipid A export ATP-binding protein MsbA LOS (CVF494)	Haemophilus influenzae PittGG
scaffold_64260_1	119	VFG013318	254	9.6e-45	66.9	VFG013318 (lgtF) UDP-glucose--lipooligosaccharide glucosyltransferase LOS (CVF494)	Haemophilus influenzae PittGG
scaffold_368_13	244	VFG013286	338	2.9e-88	61.9	VFG013286 (galE) UDP-glucose 4-epimerase LOS (CVF494)	Haemophilus influenzae Rd KW20
scaffold_807_5	477	VFG000331	476	4.7e-183	68.7	VFG000331 (rfaE) ADP-heptose synthase LOS (VF0044)	Haemophilus influenzae Rd KW20
scaffold_979_1	238	VFG013286	338	1.3e-93	69.9	VFG013286 (galE) UDP-glucose 4-epimerase LOS (CVF494)	Haemophilus influenzae Rd KW20
scaffold_1271_7	129	VFG013286	338	7.2e-38	60.3	VFG013286 (galE) UDP-glucose 4-epimerase LOS (CVF494)	Haemophilus influenzae Rd KW20
scaffold_3011_1	120	VFG013286	338	5.1e-38	64.2	VFG013286 (galE) UDP-glucose 4-epimerase LOS (CVF494)	Haemophilus influenzae Rd KW20
scaffold_5416_1	337	VFG013286	338	2.1e-129	65.2	VFG013286 (galE) UDP-glucose 4-epimerase LOS (CVF494)	Haemophilus influenzae Rd KW20
scaffold_6750_3	86	VFG000332	308	4.1e-29	70.9	VFG000332 (rfaD) ADP-L-glycero-D-mannoheptose-6-epimerase LOS (VF0044)	Haemophilus influenzae Rd KW20
scaffold_19432_1	120	VFG013248	587	7.6e-42	78.2	VFG013248 (msbA) lipid transporter ATP-binding/permease LOS (CVF494)	Haemophilus influenzae Rd KW20
scaffold_23084_2	105	VFG013418	194	3.7e-40	78.2	VFG013418 (gmhA/lpcA) phosphoheptose isomerase LOS (CVF494)	Haemophilus influenzae Rd KW20
scaffold_24804_1	223	VFG013286	338	4.2e-86	68.5	VFG013286 (galE) UDP-glucose 4-epimerase LOS (CVF494)	Haemophilus influenzae Rd KW20
scaffold_27197_1	209	VFG000331	476	5.0e-81	71.2	VFG000331 (rfaE) ADP-heptose synthase LOS (VF0044)	Haemophilus influenzae Rd KW20
scaffold_34929_1	177	VFG013530	563	2.4e-68	68.9	VFG013530 (pgi) glucose-6-phosphate isomerase Exopolysaccharide (CVF495)	Haemophilus influenzae Rd KW20
scaffold_36636_1	171	VFG013625	383	1.1e-78	75.4	VFG013625 (hemN) coproporphyrinogen III oxidase Heme biosynthesis (CVF506)	Haemophilus influenzae Rd KW20
scaffold_36816_2	93	VFG013346	295	3.7e-28	89.7	VFG013346 (galU) glucosephosphate uridylyltransferase LOS (CVF494)	Haemophilus influenzae Rd KW20
scaffold_44201_1	153	VFG013286	338	1.5e-63	74.5	VFG013286 (galE) UDP-glucose 4-epimerase LOS (CVF494)	Haemophilus influenzae Rd KW20
scaffold_53854_1	134	VFG013418	194	6.1e-56	75.9	VFG013418 (gmhA/lpcA) phosphoheptose isomerase LOS (CVF494)	Haemophilus influenzae Rd KW20
scaffold_56409_1	129	VFG013286	338	4.2e-38	60.3	VFG013286 (galE) UDP-glucose 4-epimerase LOS (CVF494)	Haemophilus influenzae Rd KW20
scaffold_57286_1	129	VFG013465	284	4.7e-45	66.4	VFG013465 (kdsA) 2-dehydro-3-deoxyphosphooctonate aldolase LOS (CVF494)	Haemophilus influenzae Rd KW20
scaffold_68841_1	105	VFG013242	332	2.1e-27	62.1	VFG013242 (lpxK) tetraacyldisaccharide 4'-kinase LOS (CVF494)	Haemophilus influenzae Rd KW20
scaffold_73254_1	108	VFG000331	476	3.9e-45	79.0	VFG000331 (rfaE) ADP-heptose synthase LOS (VF0044)	Haemophilus influenzae Rd KW20
scaffold_76291_1	88	VFG013400	346	7.1e-29	72.3	VFG013400 (rfaF) ADP-heptose-LPS heptosyltransferase II LOS (CVF494)	Haemophilus influenzae Rd KW20
scaffold_80007_1	98	VFG013625	383	5.5e-30	61.8	VFG013625 (hemN) coproporphyrinogen III oxidase Heme biosynthesis (CVF506)	Haemophilus influenzae Rd KW20
scaffold_114_8	306	VFG013417	305	3.1e-132	72.0	VFG013417 (lpxC) UDP-3-O-3-hydroxymyristoyl N-acetylglucosamine deacetylase LOS (CVF494)	Haemophilus somnus 129PT
scaffold_121_32	356	VFG013612	354	1.1e-160	77.3	VFG013612 (hemE) uroporphyrinogen decarboxylase Heme biosynthesis (CVF506)	Haemophilus somnus 129PT
scaffold_827_3	341	VFG013379	341	4.2e-85	61.4	VFG013379 (lpxD) UDP-3-O-3-hydroxymyristoyl glucosamine N-acyltransferase LOS (CVF494)	Haemophilus somnus 129PT
scaffold_1102_2	429	VFG013618	432	5.5e-167	67.1	VFG013618 (hemL) glutamate-1-semialdehyde aminotransferase Heme biosynthesis (CVF506)	Haemophilus somnus 129PT
scaffold_1874_7	161	VFG013535	549	4.0e-70	78.0	VFG013535 (pgi) glucose-6-phosphate isomerase Exopolysaccharide (CVF495)	Haemophilus somnus 129PT
scaffold_2914_2	476	VFG013435	475	8.5e-169	64.8	VFG013435 (rfaE) ADP-heptose synthase LOS (CVF494)	Haemophilus somnus 129PT
scaffold_12137_1	326	VFG013435	475	3.5e-105	62.1	VFG013435 (rfaE) ADP-heptose synthase LOS (CVF494)	Haemophilus somnus 129PT
scaffold_16568_1	300	VFG013618	432	4.9e-122	69.0	VFG013618 (hemL) glutamate-1-semialdehyde aminotransferase Heme biosynthesis (CVF506)	Haemophilus somnus 129PT
scaffold_17918_1	202	VFG013435	475	1.3e-65	64.3	VFG013435 (rfaE) ADP-heptose synthase LOS (CVF494)	Haemophilus somnus 129PT
scaffold_19767_1	175	VFG013618	432	8.8e-71	71.1	VFG013618 (hemL) glutamate-1-semialdehyde aminotransferase Heme biosynthesis (CVF506)	Haemophilus somnus 129PT
scaffold_24450_1	160	VFG013618	432	1.4e-62	70.0	VFG013618 (hemL) glutamate-1-semialdehyde aminotransferase Heme biosynthesis (CVF506)	Haemophilus somnus 129PT
scaffold_24849_1	171	VFG013618	432	8.0e-69	72.0	VFG013618 (hemL) glutamate-1-semialdehyde aminotransferase Heme biosynthesis (CVF506)	Haemophilus somnus 129PT
scaffold_36929_2	78	VFG013351	303	9.7e-22	66.2	VFG013351 (galU) UTP--glucose-1-phosphate uridylyltransferase LOS (CVF494)	Haemophilus somnus 129PT
scaffold_39900_1	110	VFG013470	284	5.7e-44	72.2	VFG013470 (kdsA) 2-dehydro-3-deoxyphosphooctonate aldolase LOS (CVF494)	Haemophilus somnus 129PT
scaffold_45633_2	67	VFG013470	284	4.9e-22	69.2	VFG013470 (kdsA) 2-dehydro-3-deoxyphosphooctonate aldolase LOS (CVF494)	Haemophilus somnus 129PT
scaffold_48626_1	143	VFG013618	432	1.7e-59	72.0	VFG013618 (hemL) glutamate-1-semialdehyde aminotransferase Heme biosynthesis (CVF506)	Haemophilus somnus 129PT
scaffold_54335_1	134	VFG013535	549	2.4e-44	63.9	VFG013535 (pgi) glucose-6-phosphate isomerase Exopolysaccharide (CVF495)	Haemophilus somnus 129PT
scaffold_61485_1	123	VFG013253	582	3.0e-41	69.9	VFG013253 (msbA) lipid A export ATP-binding/permease protein LOS (CVF494)	Haemophilus somnus 129PT
scaffold_70317_1	111	VFG013618	432	1.9e-34	61.1	VFG013618 (hemL) glutamate-1-semialdehyde aminotransferase Heme biosynthesis (CVF506)	Haemophilus somnus 129PT
scaffold_75395_1	79	VFG013618	432	7.5e-30	69.6	VFG013618 (hemL) glutamate-1-semialdehyde aminotransferase Heme biosynthesis (CVF506)	Haemophilus somnus 129PT
scaffold_92_30	344	VFG013165	341	7.9e-100	69.9	VFG013165 (lpxD) UDP-3-O-(3-hydroxymyristoyl) glucosamine N-acyltransferase LOS (CVF494)	Haemophilus somnus 2336
scaffold_122_8	429	VFG013203	432	5.1e-181	71.2	VFG013203 (hemL) glutamate-1-semialdehyde-2,1-aminomutase Heme biosynthesis (CVF506)	Haemophilus somnus 2336
scaffold_216_1	269	VFG013186	549	1.7e-110	72.1	VFG013186 (pgi) Glucose-6-phosphate isomerase Exopolysaccharide (CVF495)	Haemophilus somnus 2336
scaffold_217_10	313	VFG013198	321	6.5e-101	63.3	VFG013198 (hemC) porphobilinogen deaminase Heme biosynthesis (CVF506)	Haemophilus somnus 2336
scaffold_244_11	457	VFG013205	455	1.6e-172	62.6	VFG013205 (hemN) oxygen-independent coproporphyrinogen III oxidase Heme biosynthesis (CVF506)	Haemophilus somnus 2336
scaffold_268_3	356	VFG013200	354	1.9e-152	74.5	VFG013200 (hemE) uroporphyrinogen decarboxylase Heme biosynthesis (CVF506)	Haemophilus somnus 2336
scaffold_546_2	340	VFG013190	338	1.0e-144	74.0	VFG013190 (hitA) extracellular solute-binding protein family 1 Haemophilus iron transport locus (CVF501)	Haemophilus somnus 2336
scaffold_738_10	351	VFG013197	340	5.2e-147	76.6	VFG013197 (hemB) Porphobilinogen synthase Heme biosynthesis (CVF506)	Haemophilus somnus 2336
scaffold_748_3	308	VFG013170	305	2.7e-115	62.3	VFG013170 (lpxC) UDP-3-0-acyl N-acetylglucosamine deacetylase LOS (CVF494)	Haemophilus somnus 2336
scaffold_830_6	463	VFG013205	455	2.9e-190	72.0	VFG013205 (hemN) oxygen-independent coproporphyrinogen III oxidase Heme biosynthesis (CVF506)	Haemophilus somnus 2336
scaffold_1900_4	338	VFG013190	338	7.7e-116	60.7	VFG013190 (hitA) extracellular solute-binding protein family 1 Haemophilus iron transport locus (CVF501)	Haemophilus somnus 2336
scaffold_3343_2	339	VFG013197	340	2.2e-147	77.5	VFG013197 (hemB) Porphobilinogen synthase Heme biosynthesis (CVF506)	Haemophilus somnus 2336
scaffold_5299_2	442	VFG013183	444	7.1e-170	69.2	VFG013183 (mrsA/glmM) phosphoglucosamine mutase Exopolysaccharide (CVF495)	Haemophilus somnus 2336
scaffold_5321_2	338	VFG013190	338	5.9e-116	60.9	VFG013190 (hitA) extracellular solute-binding protein family 1 Haemophilus iron transport locus (CVF501)	Haemophilus somnus 2336
scaffold_5876_1	131	VFG013198	321	1.5e-43	67.8	VFG013198 (hemC) porphobilinogen deaminase Heme biosynthesis (CVF506)	Haemophilus somnus 2336
scaffold_6846_2	457	VFG013205	455	5.5e-173	63.1	VFG013205 (hemN) oxygen-independent coproporphyrinogen III oxidase Heme biosynthesis (CVF506)	Haemophilus somnus 2336
scaffold_9318_3	161	VFG013197	340	3.0e-57	66.5	VFG013197 (hemB) Porphobilinogen synthase Heme biosynthesis (CVF506)	Haemophilus somnus 2336
scaffold_9495_2	218	VFG013200	354	8.0e-98	78.9	VFG013200 (hemE) uroporphyrinogen decarboxylase Heme biosynthesis (CVF506)	Haemophilus somnus 2336
scaffold_9637_1	233	VFG013197	340	1.6e-91	70.8	VFG013197 (hemB) Porphobilinogen synthase Heme biosynthesis (CVF506)	Haemophilus somnus 2336
scaffold_11381_1	66	VFG013205	455	4.8e-22	68.8	VFG013205 (hemN) oxygen-independent coproporphyrinogen III oxidase Heme biosynthesis (CVF506)	Haemophilus somnus 2336
scaffold_12611_4	70	VFG013164	339	1.4e-11	62.2	VFG013164 (rffG) dTDP-glucose 4,6-dehydratase LOS (CVF494)	Haemophilus somnus 2336
scaffold_15869_2	127	VFG013169	309	1.0e-44	65.1	VFG013169 (rfaD) ADP-L-glycero-D-manno-heptose-6-epimerase LOS (CVF494)	Haemophilus somnus 2336
scaffold_16295_1	103	VFG013197	340	2.9e-42	88.9	VFG013197 (hemB) Porphobilinogen synthase Heme biosynthesis (CVF506)	Haemophilus somnus 2336
scaffold_20056_2	149	VFG013170	305	4.7e-49	65.2	VFG013170 (lpxC) UDP-3-0-acyl N-acetylglucosamine deacetylase LOS (CVF494)	Haemophilus somnus 2336
scaffold_21977_1	168	VFG013170	305	2.6e-64	65.5	VFG013170 (lpxC) UDP-3-0-acyl N-acetylglucosamine deacetylase LOS (CVF494)	Haemophilus somnus 2336
scaffold_22862_1	236	VFG013190	338	1.1e-79	63.7	VFG013190 (hitA) extracellular solute-binding protein family 1 Haemophilus iron transport locus (CVF501)	Haemophilus somnus 2336
scaffold_23114_1	235	VFG013171	195	6.9e-79	75.5	VFG013171 (gmhA/lpcA) phosphoheptose isomerase LOS (CVF494)	Haemophilus somnus 2336
scaffold_24907_1	58	VFG013192	349	2.9e-15	60.3	VFG013192 (hitC) ABC transporter related Haemophilus iron transport locus (CVF501)	Haemophilus somnus 2336
scaffold_25721_1	217	VFG013173	476	1.9e-75	66.8	VFG013173 (rfaE) rfaE bifunctional protein LOS (CVF494)	Haemophilus somnus 2336
scaffold_25941_1	216	VFG013198	321	4.7e-66	61.7	VFG013198 (hemC) porphobilinogen deaminase Heme biosynthesis (CVF506)	Haemophilus somnus 2336
scaffold_30221_1	45	VFG013200	354	7.6e-19	88.9	VFG013200 (hemE) uroporphyrinogen decarboxylase Heme biosynthesis (CVF506)	Haemophilus somnus 2336
scaffold_30240_2	79	VFG013198	321	4.3e-25	70.1	VFG013198 (hemC) porphobilinogen deaminase Heme biosynthesis (CVF506)	Haemophilus somnus 2336
scaffold_30729_1	105	VFG013190	338	4.6e-35	66.3	VFG013190 (hitA) extracellular solute-binding protein family 1 Haemophilus iron transport locus (CVF501)	Haemophilus somnus 2336
scaffold_31291_1	191	VFG013203	432	2.0e-68	67.5	VFG013203 (hemL) glutamate-1-semialdehyde-2,1-aminomutase Heme biosynthesis (CVF506)	Haemophilus somnus 2336
scaffold_32113_1	92	VFG013200	354	4.5e-42	87.9	VFG013200 (hemE) uroporphyrinogen decarboxylase Heme biosynthesis (CVF506)	Haemophilus somnus 2336
scaffold_33172_1	130	VFG013170	305	8.8e-44	63.0	VFG013170 (lpxC) UDP-3-0-acyl N-acetylglucosamine deacetylase LOS (CVF494)	Haemophilus somnus 2336
scaffold_34109_1	179	VFG013198	321	1.2e-54	61.8	VFG013198 (hemC) porphobilinogen deaminase Heme biosynthesis (CVF506)	Haemophilus somnus 2336
scaffold_34186_1	97	VFG013190	338	2.4e-30	63.5	VFG013190 (hitA) extracellular solute-binding protein family 1 Haemophilus iron transport locus (CVF501)	Haemophilus somnus 2336
scaffold_35207_1	176	VFG013197	340	4.0e-71	74.1	VFG013197 (hemB) Porphobilinogen synthase Heme biosynthesis (CVF506)	Haemophilus somnus 2336
scaffold_35312_1	176	VFG013170	305	1.3e-69	66.5	VFG013170 (lpxC) UDP-3-0-acyl N-acetylglucosamine deacetylase LOS (CVF494)	Haemophilus somnus 2336
scaffold_35724_1	174	VFG013165	341	1.9e-54	76.3	VFG013165 (lpxD) UDP-3-O-(3-hydroxymyristoyl) glucosamine N-acyltransferase LOS (CVF494)	Haemophilus somnus 2336
scaffold_37439_1	169	VFG013192	349	9.1e-49	61.2	VFG013192 (hitC) ABC transporter related Haemophilus iron transport locus (CVF501)	Haemophilus somnus 2336
scaffold_38228_1	84	VFG013205	455	7.7e-33	72.8	VFG013205 (hemN) oxygen-independent coproporphyrinogen III oxidase Heme biosynthesis (CVF506)	Haemophilus somnus 2336
scaffold_40016_1	162	VFG013205	455	3.4e-61	65.8	VFG013205 (hemN) oxygen-independent coproporphyrinogen III oxidase Heme biosynthesis (CVF506)	Haemophilus somnus 2336
scaffold_43621_1	154	VFG013149	596	5.9e-55	66.2	VFG013149 (msbA) lipid A ABC exporter, fused ATPase and inner membrane subunits MsbA LOS (CVF494)	Haemophilus somnus 2336
scaffold_45956_1	149	VFG013203	432	4.9e-54	66.9	VFG013203 (hemL) glutamate-1-semialdehyde-2,1-aminomutase Heme biosynthesis (CVF506)	Haemophilus somnus 2336
scaffold_46113_1	115	VFG013149	596	1.8e-32	61.6	VFG013149 (msbA) lipid A ABC exporter, fused ATPase and inner membrane subunits MsbA LOS (CVF494)	Haemophilus somnus 2336
scaffold_46519_1	147	VFG013200	354	6.9e-61	77.2	VFG013200 (hemE) uroporphyrinogen decarboxylase Heme biosynthesis (CVF506)	Haemophilus somnus 2336
scaffold_46901_2	110	VFG013197	340	4.6e-33	64.5	VFG013197 (hemB) Porphobilinogen synthase Heme biosynthesis (CVF506)	Haemophilus somnus 2336
scaffold_48004_1	82	VFG013165	341	1.1e-34	81.8	VFG013165 (lpxD) UDP-3-O-(3-hydroxymyristoyl) glucosamine N-acyltransferase LOS (CVF494)	Haemophilus somnus 2336
scaffold_48084_1	144	VFG013203	432	3.0e-53	64.5	VFG013203 (hemL) glutamate-1-semialdehyde-2,1-aminomutase Heme biosynthesis (CVF506)	Haemophilus somnus 2336
scaffold_48702_1	80	VFG013179	284	6.1e-19	66.7	VFG013179 (kdsA) 2-dehydro-3-deoxyphosphooctonate aldolase LOS (CVF494)	Haemophilus somnus 2336
scaffold_50450_1	141	VFG013186	549	2.5e-52	66.7	VFG013186 (pgi) Glucose-6-phosphate isomerase Exopolysaccharide (CVF495)	Haemophilus somnus 2336
scaffold_51014_1	139	VFG013200	354	1.3e-61	82.0	VFG013200 (hemE) uroporphyrinogen decarboxylase Heme biosynthesis (CVF506)	Haemophilus somnus 2336
scaffold_51549_1	138	VFG013205	455	1.8e-47	61.6	VFG013205 (hemN) oxygen-independent coproporphyrinogen III oxidase Heme biosynthesis (CVF506)	Haemophilus somnus 2336
scaffold_51874_1	69	VFG013188	454	7.3e-21	70.1	VFG013188 (manB) Phosphomannomutase Exopolysaccharide (CVF495)	Haemophilus somnus 2336
scaffold_56247_1	86	VFG013205	455	5.7e-31	71.1	VFG013205 (hemN) oxygen-independent coproporphyrinogen III oxidase Heme biosynthesis (CVF506)	Haemophilus somnus 2336
scaffold_57302_1	63	VFG013203	432	8.7e-21	66.7	VFG013203 (hemL) glutamate-1-semialdehyde-2,1-aminomutase Heme biosynthesis (CVF506)	Haemophilus somnus 2336
scaffold_58536_1	128	VFG013197	340	2.1e-50	75.0	VFG013197 (hemB) Porphobilinogen synthase Heme biosynthesis (CVF506)	Haemophilus somnus 2336
scaffold_59079_1	127	VFG013186	549	1.9e-59	81.3	VFG013186 (pgi) Glucose-6-phosphate isomerase Exopolysaccharide (CVF495)	Haemophilus somnus 2336
scaffold_59086_1	84	VFG013188	454	3.0e-24	64.6	VFG013188 (manB) Phosphomannomutase Exopolysaccharide (CVF495)	Haemophilus somnus 2336
scaffold_59379_1	126	VFG013190	338	1.0e-41	63.5	VFG013190 (hitA) extracellular solute-binding protein family 1 Haemophilus iron transport locus (CVF501)	Haemophilus somnus 2336
scaffold_66229_1	117	VFG013197	340	4.4e-50	82.9	VFG013197 (hemB) Porphobilinogen synthase Heme biosynthesis (CVF506)	Haemophilus somnus 2336
scaffold_69958_1	112	VFG013201	170	2.6e-36	60.7	VFG013201 (hemG) Protoporphyrinogen oxidase Heme biosynthesis (CVF506)	Haemophilus somnus 2336
scaffold_72444_1	109	VFG013205	455	3.1e-34	60.6	VFG013205 (hemN) oxygen-independent coproporphyrinogen III oxidase Heme biosynthesis (CVF506)	Haemophilus somnus 2336
scaffold_74282_1	106	VFG013198	321	8.0e-35	70.8	VFG013198 (hemC) porphobilinogen deaminase Heme biosynthesis (CVF506)	Haemophilus somnus 2336
scaffold_75225_1	104	VFG013170	305	1.1e-31	64.2	VFG013170 (lpxC) UDP-3-0-acyl N-acetylglucosamine deacetylase LOS (CVF494)	Haemophilus somnus 2336
scaffold_75368_1	105	VFG013203	432	2.7e-35	64.4	VFG013203 (hemL) glutamate-1-semialdehyde-2,1-aminomutase Heme biosynthesis (CVF506)	Haemophilus somnus 2336
scaffold_75642_1	99	VFG013200	354	1.1e-33	83.1	VFG013200 (hemE) uroporphyrinogen decarboxylase Heme biosynthesis (CVF506)	Haemophilus somnus 2336
scaffold_76154_1	103	VFG013170	305	1.4e-44	78.6	VFG013170 (lpxC) UDP-3-0-acyl N-acetylglucosamine deacetylase LOS (CVF494)	Haemophilus somnus 2336
scaffold_78102_1	101	VFG013170	305	3.2e-41	77.0	VFG013170 (lpxC) UDP-3-0-acyl N-acetylglucosamine deacetylase LOS (CVF494)	Haemophilus somnus 2336
scaffold_79206_1	100	VFG013205	455	5.8e-35	65.0	VFG013205 (hemN) oxygen-independent coproporphyrinogen III oxidase Heme biosynthesis (CVF506)	Haemophilus somnus 2336
scaffold_2416_3	112	VFG006470	238	3.0e-32	60.4	VFG006470 (ureA) urease alpha subunit Urease (CVF221)	Helicobacter acinonychis str. Sheeba
scaffold_2790_2	218	VFG006495	199	2.2e-71	61.9	VFG006495 (ureG) urease accessory protein UreG Urease (CVF221)	Helicobacter acinonychis str. Sheeba
scaffold_19592_2	112	VFG006470	238	1.8e-32	60.4	VFG006470 (ureA) urease alpha subunit Urease (CVF221)	Helicobacter acinonychis str. Sheeba
scaffold_59490_2	62	VFG006495	199	1.8e-15	62.1	VFG006495 (ureG) urease accessory protein UreG Urease (CVF221)	Helicobacter acinonychis str. Sheeba
scaffold_21_2	101	VFG006471	225	9.3e-33	63.4	VFG006471 (ureA) urease Urease (CVF221)	Helicobacter hepaticus ATCC 51449
scaffold_21_4	574	VFG006476	569	1.3e-232	69.5	VFG006476 (ureB) urease Urease (CVF221)	Helicobacter hepaticus ATCC 51449
scaffold_641_7	204	VFG006496	200	6.8e-75	64.0	VFG006496 (ureG) urease/hydrogenase-associated predicted GTPase UreG Urease (CVF221)	Helicobacter hepaticus ATCC 51449
scaffold_4700_3	513	VFG006476	569	7.2e-182	62.4	VFG006476 (ureB) urease Urease (CVF221)	Helicobacter hepaticus ATCC 51449
scaffold_15427_2	167	VFG006496	200	1.3e-63	66.7	VFG006496 (ureG) urease/hydrogenase-associated predicted GTPase UreG Urease (CVF221)	Helicobacter hepaticus ATCC 51449
scaffold_21303_2	189	VFG006476	569	1.9e-63	61.2	VFG006476 (ureB) urease Urease (CVF221)	Helicobacter hepaticus ATCC 51449
scaffold_21_8	213	VFG000274	199	3.3e-88	78.3	VFG000274 (ureG) urease accessory protein (ureG) Urease (VF0050)	Helicobacter pylori 26695
scaffold_23291_1	196	VFG043365	673	4.3e-34	61.9	VFG043365 (tlpC) membrane-bound chemoreceptor Pse5Ac7Ac (AI150)	Helicobacter pylori 26695
scaffold_31504_1	189	VFG000270	569	2.7e-73	67.7	VFG000270 (ureB) urease beta subunit UreB, urea amidohydrolase Urease (VF0050)	Helicobacter pylori 26695
scaffold_47619_1	146	VFG000270	569	5.1e-48	63.0	VFG000270 (ureB) urease beta subunit UreB, urea amidohydrolase Urease (VF0050)	Helicobacter pylori 26695
scaffold_66223_1	117	VFG043367	565	5.7e-18	63.6	VFG043367 (tlpB) membrane-bound chemoreceptor sensing pH and autoinducer-2 Pse5Ac7Ac (AI150)	Helicobacter pylori 26695
scaffold_80648_1	97	VFG043365	673	1.4e-14	69.1	VFG043365 (tlpC) membrane-bound chemoreceptor Pse5Ac7Ac (AI150)	Helicobacter pylori 26695
scaffold_2416_7	58	VFG006492	199	2.3e-15	72.7	VFG006492 (ureG) UREASE ACCESSORY PROTEIN Urease (CVF221)	Helicobacter pylori J99
scaffold_68750_1	73	VFG006492	199	1.3e-20	61.8	VFG006492 (ureG) UREASE ACCESSORY PROTEIN Urease (CVF221)	Helicobacter pylori J99
scaffold_2416_4	572	VFG019522	569	5.9e-209	62.6	VFG019522 (ureB) urease subunit beta Urease (CVF221)	Helicobacter pylori Shi470
scaffold_1009_10	336	VFG049189	823	8.5e-115	63.0	VFG049189 (A225_4443) clpB protein T6SS-II (CVF861)	Klebsiella oxytoca E718
scaffold_2709_2	301	VFG048811	296	2.0e-99	61.4	VFG048811 (A225_3879) dTDP-4-dehydrorhamnose reductase Capsule (CVF854)	Klebsiella oxytoca E718
scaffold_3912_2	352	VFG049189	823	2.1e-148	74.4	VFG049189 (A225_4443) clpB protein T6SS-II (CVF861)	Klebsiella oxytoca E718
scaffold_8808_2	389	VFG048789	388	6.9e-169	75.3	VFG048789 (A225_3877) UDP-glucose dehydrogenase Capsule (CVF854)	Klebsiella oxytoca E718
scaffold_10242_1	431	VFG049189	823	1.4e-157	67.9	VFG049189 (A225_4443) clpB protein T6SS-II (CVF861)	Klebsiella oxytoca E718
scaffold_13254_1	353	VFG049189	823	9.6e-117	60.5	VFG049189 (A225_4443) clpB protein T6SS-II (CVF861)	Klebsiella oxytoca E718
scaffold_21212_1	225	VFG049189	823	4.9e-90	73.2	VFG049189 (A225_4443) clpB protein T6SS-II (CVF861)	Klebsiella oxytoca E718
scaffold_36111_1	64	VFG049189	823	1.3e-16	68.4	VFG049189 (A225_4443) clpB protein T6SS-II (CVF861)	Klebsiella oxytoca E718
scaffold_36216_2	94	VFG049189	823	5.8e-29	67.0	VFG049189 (A225_4443) clpB protein T6SS-II (CVF861)	Klebsiella oxytoca E718
scaffold_38599_1	134	VFG048921	721	2.7e-43	66.9	VFG048921 (A225_3892) tyrosine-protein kinase Wzc Capsule (CVF854)	Klebsiella oxytoca E718
scaffold_42027_1	157	VFG049136	1048	8.1e-76	90.4	VFG049136 (A225_1326) RND efflux system AcrAB (CVF859)	Klebsiella oxytoca E718
scaffold_45947_1	149	VFG049189	823	2.1e-49	67.8	VFG049189 (A225_4443) clpB protein T6SS-II (CVF861)	Klebsiella oxytoca E718
scaffold_46400_1	124	VFG049136	1048	1.6e-58	95.9	VFG049136 (A225_1326) RND efflux system AcrAB (CVF859)	Klebsiella oxytoca E718
scaffold_50796_1	140	VFG049189	823	1.3e-48	66.9	VFG049189 (A225_4443) clpB protein T6SS-II (CVF861)	Klebsiella oxytoca E718
scaffold_51408_1	123	VFG049189	823	3.9e-41	70.7	VFG049189 (A225_4443) clpB protein T6SS-II (CVF861)	Klebsiella oxytoca E718
scaffold_54675_1	133	VFG048789	388	4.1e-52	71.4	VFG048789 (A225_3877) UDP-glucose dehydrogenase Capsule (CVF854)	Klebsiella oxytoca E718
scaffold_55904_1	131	VFG049189	823	6.8e-36	60.5	VFG049189 (A225_4443) clpB protein T6SS-II (CVF861)	Klebsiella oxytoca E718
scaffold_56849_1	130	VFG049189	823	7.0e-49	72.7	VFG049189 (A225_4443) clpB protein T6SS-II (CVF861)	Klebsiella oxytoca E718
scaffold_58696_1	127	VFG049189	823	1.5e-64	97.6	VFG049189 (A225_4443) clpB protein T6SS-II (CVF861)	Klebsiella oxytoca E718
scaffold_60802_1	124	VFG049189	823	7.9e-34	61.4	VFG049189 (A225_4443) clpB protein T6SS-II (CVF861)	Klebsiella oxytoca E718
scaffold_63367_1	121	VFG049189	823	4.7e-47	76.5	VFG049189 (A225_4443) clpB protein T6SS-II (CVF861)	Klebsiella oxytoca E718
scaffold_65892_1	70	VFG048822	289	6.9e-27	78.6	VFG048822 (A225_3880) glucose-1-phosphate thymidylyltransferase Capsule (CVF854)	Klebsiella oxytoca E718
scaffold_66482_1	117	VFG049189	823	1.2e-39	64.9	VFG049189 (A225_4443) clpB protein T6SS-II (CVF861)	Klebsiella oxytoca E718
scaffold_67152_1	115	VFG049125	361	1.6e-52	85.2	VFG049125 (A225_1327) membrane fusion protein of RND family multidrug efflux pump AcrAB (CVF859)	Klebsiella oxytoca E718
scaffold_69874_1	112	VFG048789	388	6.7e-48	79.5	VFG048789 (A225_3877) UDP-glucose dehydrogenase Capsule (CVF854)	Klebsiella oxytoca E718
scaffold_74312_1	106	VFG049189	823	8.5e-53	92.5	VFG049189 (A225_4443) clpB protein T6SS-II (CVF861)	Klebsiella oxytoca E718
scaffold_74957_1	105	VFG049136	1048	1.1e-36	67.9	VFG049136 (A225_1326) RND efflux system AcrAB (CVF859)	Klebsiella oxytoca E718
scaffold_79291_1	99	VFG049189	823	2.8e-34	64.6	VFG049189 (A225_4443) clpB protein T6SS-II (CVF861)	Klebsiella oxytoca E718
scaffold_80418_1	97	VFG049189	823	5.3e-25	60.2	VFG049189 (A225_4443) clpB protein T6SS-II (CVF861)	Klebsiella oxytoca E718
scaffold_264_6	389	VFG048790	388	2.8e-162	71.1	VFG048790 (KOX_25120) UDP-glucose 6-dehydrogenase Capsule (CVF854)	Klebsiella oxytoca KCTC 1686
scaffold_385_2	858	VFG049190	857	0.0e+00	83.0	VFG049190 (KOX_00005) protein disaggregation chaperone T6SS-II (CVF861)	Klebsiella oxytoca KCTC 1686
scaffold_1380_1	422	VFG049190	857	1.5e-188	78.0	VFG049190 (KOX_00005) protein disaggregation chaperone T6SS-II (CVF861)	Klebsiella oxytoca KCTC 1686
scaffold_9718_1	244	VFG049190	857	3.0e-93	69.3	VFG049190 (KOX_00005) protein disaggregation chaperone T6SS-II (CVF861)	Klebsiella oxytoca KCTC 1686
scaffold_29845_1	51	VFG048790	388	1.9e-13	72.5	VFG048790 (KOX_25120) UDP-glucose 6-dehydrogenase Capsule (CVF854)	Klebsiella oxytoca KCTC 1686
scaffold_270_8	1038	VFG049139	1048	0.0e+00	69.3	VFG049139 (acrB) acriflavine resistance protein B AcrAB (CVF859)	Klebsiella pneumoniae 342
scaffold_27736_2	122	VFG048542	727	5.2e-38	72.1	VFG048542 (KPK_3197) outer membrane receptor FepA Salmochelin (CVF850)	Klebsiella pneumoniae 342
scaffold_63183_1	50	VFG048828	468	5.8e-20	85.4	VFG048828 (KPN2242_15550) 6-phosphogluconate dehydrogenase Capsule (CVF854)	Klebsiella pneumoniae KCTC 2242
scaffold_18273_1	279	VFG049191	857	2.9e-76	60.3	VFG049191 (A79E_1186) ClpB protein T6SS-II (CVF861)	Klebsiella pneumoniae subsp. pneumoniae 1084
scaffold_25035_1	222	VFG049191	857	8.8e-84	70.6	VFG049191 (A79E_1186) ClpB protein T6SS-II (CVF861)	Klebsiella pneumoniae subsp. pneumoniae 1084
scaffold_25798_1	217	VFG049191	857	2.9e-92	75.1	VFG049191 (A79E_1186) ClpB protein T6SS-II (CVF861)	Klebsiella pneumoniae subsp. pneumoniae 1084
scaffold_26803_1	211	VFG049191	857	1.9e-48	61.3	VFG049191 (A79E_1186) ClpB protein T6SS-II (CVF861)	Klebsiella pneumoniae subsp. pneumoniae 1084
scaffold_34194_1	179	VFG049191	857	3.2e-68	72.1	VFG049191 (A79E_1186) ClpB protein T6SS-II (CVF861)	Klebsiella pneumoniae subsp. pneumoniae 1084
scaffold_35171_1	177	VFG049191	857	1.4e-68	71.8	VFG049191 (A79E_1186) ClpB protein T6SS-II (CVF861)	Klebsiella pneumoniae subsp. pneumoniae 1084
scaffold_43558_1	154	VFG049191	857	1.8e-51	70.1	VFG049191 (A79E_1186) ClpB protein T6SS-II (CVF861)	Klebsiella pneumoniae subsp. pneumoniae 1084
scaffold_49148_1	143	VFG049191	857	2.5e-60	76.8	VFG049191 (A79E_1186) ClpB protein T6SS-II (CVF861)	Klebsiella pneumoniae subsp. pneumoniae 1084
scaffold_50529_1	140	VFG049191	857	2.0e-49	70.5	VFG049191 (A79E_1186) ClpB protein T6SS-II (CVF861)	Klebsiella pneumoniae subsp. pneumoniae 1084
scaffold_52474_1	137	VFG049191	857	3.5e-67	92.7	VFG049191 (A79E_1186) ClpB protein T6SS-II (CVF861)	Klebsiella pneumoniae subsp. pneumoniae 1084
scaffold_53903_1	135	VFG049191	857	6.6e-50	70.4	VFG049191 (A79E_1186) ClpB protein T6SS-II (CVF861)	Klebsiella pneumoniae subsp. pneumoniae 1084
scaffold_62680_1	121	VFG049191	857	1.4e-38	68.4	VFG049191 (A79E_1186) ClpB protein T6SS-II (CVF861)	Klebsiella pneumoniae subsp. pneumoniae 1084
scaffold_66527_1	116	VFG049191	857	5.7e-34	62.1	VFG049191 (A79E_1186) ClpB protein T6SS-II (CVF861)	Klebsiella pneumoniae subsp. pneumoniae 1084
scaffold_77363_1	102	VFG049191	857	4.5e-43	79.4	VFG049191 (A79E_1186) ClpB protein T6SS-II (CVF861)	Klebsiella pneumoniae subsp. pneumoniae 1084
scaffold_79424_1	99	VFG049191	857	1.5e-46	98.0	VFG049191 (A79E_1186) ClpB protein T6SS-II (CVF861)	Klebsiella pneumoniae subsp. pneumoniae 1084
scaffold_1710_3	294	VFG048826	289	2.3e-132	78.3	VFG048826 (KPHS_35570) glucose-1-phosphate thymidylyltransferase Capsule (CVF854)	Klebsiella pneumoniae subsp. pneumoniae HS11286
scaffold_2709_4	184	VFG048804	184	1.4e-66	64.7	VFG048804 (KPHS_35550) dTDP-4-dehydrorhamnose 3,5-epimerase Capsule (CVF854)	Klebsiella pneumoniae subsp. pneumoniae HS11286
scaffold_13821_1	341	VFG049193	823	4.7e-121	65.5	VFG049193 (KPHS_39850) protein disaggregation chaperone T6SS-II (CVF861)	Klebsiella pneumoniae subsp. pneumoniae HS11286
scaffold_33463_1	182	VFG049193	823	1.4e-47	61.4	VFG049193 (KPHS_39850) protein disaggregation chaperone T6SS-II (CVF861)	Klebsiella pneumoniae subsp. pneumoniae HS11286
scaffold_36669_1	172	VFG048837	354	3.7e-58	60.3	VFG048837 (KPHS_35580) dTDP-D-glucose 4,6-dehydratase Capsule (CVF854)	Klebsiella pneumoniae subsp. pneumoniae HS11286
scaffold_43144_1	154	VFG048826	289	3.8e-62	78.1	VFG048826 (KPHS_35570) glucose-1-phosphate thymidylyltransferase Capsule (CVF854)	Klebsiella pneumoniae subsp. pneumoniae HS11286
scaffold_43479_1	154	VFG048826	289	7.7e-63	72.7	VFG048826 (KPHS_35570) glucose-1-phosphate thymidylyltransferase Capsule (CVF854)	Klebsiella pneumoniae subsp. pneumoniae HS11286
scaffold_52117_1	137	VFG049129	397	1.1e-49	76.5	VFG049129 (KPHS_11890) acridine efflux pump AcrAB (CVF859)	Klebsiella pneumoniae subsp. pneumoniae HS11286
scaffold_277_11	475	VFG048851	468	3.1e-187	69.5	VFG048851 (gnd) 6-phosphogluconate dehydrogenase Capsule (CVF854)	Klebsiella pneumoniae subsp. pneumoniae MGH 78578
scaffold_1756_1	204	VFG049039	1188	1.4e-80	68.5	VFG049039 (KPN_02484) glycosyltransferase LPS rfb locus (CVF857)	Klebsiella pneumoniae subsp. pneumoniae MGH 78578
scaffold_1756_3	453	VFG049050	443	3.0e-171	66.1	VFG049050 (KPN_02485) O-antigen export - NBD component LPS rfb locus (CVF857)	Klebsiella pneumoniae subsp. pneumoniae MGH 78578
scaffold_3300_3	470	VFG048851	468	7.8e-175	66.3	VFG048851 (gnd) 6-phosphogluconate dehydrogenase Capsule (CVF854)	Klebsiella pneumoniae subsp. pneumoniae MGH 78578
scaffold_10288_1	406	VFG048851	468	1.3e-162	70.2	VFG048851 (gnd) 6-phosphogluconate dehydrogenase Capsule (CVF854)	Klebsiella pneumoniae subsp. pneumoniae MGH 78578
scaffold_26806_1	128	VFG048851	468	1.4e-46	69.0	VFG048851 (gnd) 6-phosphogluconate dehydrogenase Capsule (CVF854)	Klebsiella pneumoniae subsp. pneumoniae MGH 78578
scaffold_45185_1	116	VFG048984	377	4.2e-45	67.2	VFG048984 (wza) CPS export - outer membrane protein Capsule (CVF854)	Klebsiella pneumoniae subsp. pneumoniae MGH 78578
scaffold_18784_1	274	VFG048797(gb|YP_002920350.1)	388	2.4e-123	77.7	VFG048797(gb|YP_002920350.1) (ugd) UDP-glucose 6-dehydrogenase Capsule (VF0560)	Klebsiella pneumoniae subsp. pneumoniae NTUH-K2044
scaffold_27106_2	50	VFG049144(gb|YP_002918165.1)	1048	1.9e-15	72.0	VFG049144(gb|YP_002918165.1) (acrB) acriflavine resistance protein B AcrAB (VF0568)	Klebsiella pneumoniae subsp. pneumoniae NTUH-K2044
scaffold_31287_1	90	VFG048797(gb|YP_002920350.1)	388	6.6e-22	63.3	VFG048797(gb|YP_002920350.1) (ugd) UDP-glucose 6-dehydrogenase Capsule (VF0560)	Klebsiella pneumoniae subsp. pneumoniae NTUH-K2044
scaffold_48966_1	143	VFG049144(gb|YP_002918165.1)	1048	7.7e-25	63.5	VFG049144(gb|YP_002918165.1) (acrB) acriflavine resistance protein B AcrAB (VF0568)	Klebsiella pneumoniae subsp. pneumoniae NTUH-K2044
scaffold_53657_1	75	VFG049116(gb|YP_002918200.1)	160	7.4e-27	72.0	VFG049116(gb|YP_002918200.1) (allA) ureidoglycolate hydrolase Allantion utilization (VF0572)	Klebsiella pneumoniae subsp. pneumoniae NTUH-K2044
scaffold_54499_1	134	VFG049144(gb|YP_002918165.1)	1048	3.7e-53	73.1	VFG049144(gb|YP_002918165.1) (acrB) acriflavine resistance protein B AcrAB (VF0568)	Klebsiella pneumoniae subsp. pneumoniae NTUH-K2044
scaffold_61315_1	108	VFG049120(gb|YP_002918207.1)	453	2.2e-48	86.0	VFG049120(gb|YP_002918207.1) (allB) allantoinase Allantion utilization (VF0572)	Klebsiella pneumoniae subsp. pneumoniae NTUH-K2044
scaffold_63400_1	121	VFG049144(gb|YP_002918165.1)	1048	1.6e-39	66.9	VFG049144(gb|YP_002918165.1) (acrB) acriflavine resistance protein B AcrAB (VF0568)	Klebsiella pneumoniae subsp. pneumoniae NTUH-K2044
scaffold_65534_1	118	VFG049144(gb|YP_002918165.1)	1048	1.3e-38	64.9	VFG049144(gb|YP_002918165.1) (acrB) acriflavine resistance protein B AcrAB (VF0568)	Klebsiella pneumoniae subsp. pneumoniae NTUH-K2044
scaffold_67925_1	115	VFG049120(gb|YP_002918207.1)	453	5.2e-64	95.7	VFG049120(gb|YP_002918207.1) (allB) allantoinase Allantion utilization (VF0572)	Klebsiella pneumoniae subsp. pneumoniae NTUH-K2044
scaffold_71960_1	59	VFG049122(gb|YP_002918211.1)	411	3.9e-23	85.7	VFG049122(gb|YP_002918211.1) (allC) allantoate amidohydrolase Allantion utilization (VF0572)	Klebsiella pneumoniae subsp. pneumoniae NTUH-K2044
scaffold_74064_1	63	VFG048797(gb|YP_002920350.1)	388	3.3e-20	69.4	VFG048797(gb|YP_002920350.1) (ugd) UDP-glucose 6-dehydrogenase Capsule (VF0560)	Klebsiella pneumoniae subsp. pneumoniae NTUH-K2044
scaffold_75574_2	52	VFG049120(gb|YP_002918207.1)	453	4.8e-17	82.7	VFG049120(gb|YP_002918207.1) (allB) allantoinase Allantion utilization (VF0572)	Klebsiella pneumoniae subsp. pneumoniae NTUH-K2044
scaffold_76240_1	98	VFG049144(gb|YP_002918165.1)	1048	6.0e-37	78.6	VFG049144(gb|YP_002918165.1) (acrB) acriflavine resistance protein B AcrAB (VF0568)	Klebsiella pneumoniae subsp. pneumoniae NTUH-K2044
scaffold_2755_4	336	VFG048981	335	4.0e-157	79.3	VFG048981 (uge) Uridine diphosphate galacturonate 4-epimerase Capsule (CVF854)	Klebsiella pneumoniae subsp. rhinoscleromatis SB3432
scaffold_52818_1	120	VFG048820	148	2.9e-41	66.7	VFG048820 (wzb) Protein tyrosine phosphatase Capsule (CVF854)	Klebsiella pneumoniae subsp. rhinoscleromatis SB3432
scaffold_54995_1	72	VFG048986	334	4.5e-13	62.5	VFG048986 (uge) uridine diphosphate galacturonate 4-epimerase Capsule (CVF854)	Klebsiella pneumoniae subsp. rhinoscleromatis SB3432
scaffold_58004_2	62	VFG048952	471	1.5e-17	69.4	VFG048952 (manC) mannose-1-phosphate guanylyltransferase-mannose-6-phosphate isomerase Capsule (CVF854)	Klebsiella pneumoniae subsp. rhinoscleromatis SB3432
scaffold_75569_1	62	VFG048820	148	2.0e-14	64.7	VFG048820 (wzb) Protein tyrosine phosphatase Capsule (CVF854)	Klebsiella pneumoniae subsp. rhinoscleromatis SB3432
scaffold_14098_1	337	VFG049146	1048	7.2e-106	60.1	VFG049146 (Kvar_3938) hydrophobe/amphiphile efflux-1 (HAE1) family transporter AcrAB (CVF859)	Klebsiella variicola At-22
scaffold_60915_1	124	VFG049146	1048	1.2e-37	63.7	VFG049146 (Kvar_3938) hydrophobe/amphiphile efflux-1 (HAE1) family transporter AcrAB (CVF859)	Klebsiella variicola At-22
scaffold_17_124	543	VFG045692	550	2.1e-187	64.4	VFG045692 (htpB) molecular chaperone GroEL Hsp60 (CVF347)	Legionella longbeachae NSW150
scaffold_4726_1	64	VFG045727	64	3.4e-20	77.4	VFG045727 (csrA) global regulator CsrA Carbon storage regulator A (CVF362)	Legionella longbeachae NSW150
scaffold_8144_1	137	VFG045692	550	3.1e-39	64.2	VFG045692 (htpB) molecular chaperone GroEL Hsp60 (CVF347)	Legionella longbeachae NSW150
scaffold_20841_1	64	VFG045727	64	3.4e-20	77.4	VFG045727 (csrA) global regulator CsrA Carbon storage regulator A (CVF362)	Legionella longbeachae NSW150
scaffold_33767_2	129	VFG045692	550	1.8e-49	77.9	VFG045692 (htpB) molecular chaperone GroEL Hsp60 (CVF347)	Legionella longbeachae NSW150
scaffold_36619_1	171	VFG045692	550	1.0e-55	62.0	VFG045692 (htpB) molecular chaperone GroEL Hsp60 (CVF347)	Legionella longbeachae NSW150
scaffold_39676_1	45	VFG045721	750	1.4e-12	70.7	VFG045721 (feoB) ferrous iron transport protein B Ferrous iron transport (CVF359)	Legionella longbeachae NSW150
scaffold_67346_1	115	VFG045720	649	8.7e-35	68.7	VFG045720 (ccmF) cytochrome C-type biogenesis protein CcmF Cytochrome c muturation (ccm) locus (CVF358)	Legionella longbeachae NSW150
scaffold_121_15	549	VFG010484	548	2.5e-220	75.8	VFG010484 (htpB) 60 kDa chaperonin (Protein Cpn60)(groEL protein)(Heat shock protein B). Hsp60 (CVF347)	Legionella pneumophila str. Paris
scaffold_1091_7	546	VFG010484	548	1.1e-220	74.8	VFG010484 (htpB) 60 kDa chaperonin (Protein Cpn60)(groEL protein)(Heat shock protein B). Hsp60 (CVF347)	Legionella pneumophila str. Paris
scaffold_6043_1	546	VFG010484	548	4.5e-222	74.9	VFG010484 (htpB) 60 kDa chaperonin (Protein Cpn60)(groEL protein)(Heat shock protein B). Hsp60 (CVF347)	Legionella pneumophila str. Paris
scaffold_35730_1	174	VFG010484	548	2.5e-65	73.4	VFG010484 (htpB) 60 kDa chaperonin (Protein Cpn60)(groEL protein)(Heat shock protein B). Hsp60 (CVF347)	Legionella pneumophila str. Paris
scaffold_328_8	726	VFG001862	731	0.0e+00	77.3	VFG001862 (katB) catalase-peroxidase KatB KatAB (VF0168)	Legionella pneumophila subsp. pneumophila str. Philadelphia 1
scaffold_910_3	194	VFG001867	196	4.1e-77	66.5	VFG001867 (sodB) superoxide dismutase SodB (VF0169)	Legionella pneumophila subsp. pneumophila str. Philadelphia 1
scaffold_1156_6	62	VFG010906	82	9.5e-20	81.8	VFG010906 (csrA) global regulator (carbon storage regulator) Carbon storage regulator A (CVF362)	Legionella pneumophila subsp. pneumophila str. Philadelphia 1
scaffold_1290_3	733	VFG001861	749	2.5e-276	65.1	VFG001861 (katA) catalase/(hydro)peroxidase KatAB (VF0168)	Legionella pneumophila subsp. pneumophila str. Philadelphia 1
scaffold_8838_2	64	VFG010906	82	5.7e-20	77.8	VFG010906 (csrA) global regulator (carbon storage regulator) Carbon storage regulator A (CVF362)	Legionella pneumophila subsp. pneumophila str. Philadelphia 1
scaffold_15296_1	194	VFG001867	196	2.0e-84	71.1	VFG001867 (sodB) superoxide dismutase SodB (VF0169)	Legionella pneumophila subsp. pneumophila str. Philadelphia 1
scaffold_15739_2	40	VFG001867	196	2.0e-15	83.3	VFG001867 (sodB) superoxide dismutase SodB (VF0169)	Legionella pneumophila subsp. pneumophila str. Philadelphia 1
scaffold_17501_1	122	VFG001867	196	3.8e-49	68.9	VFG001867 (sodB) superoxide dismutase SodB (VF0169)	Legionella pneumophila subsp. pneumophila str. Philadelphia 1
scaffold_18861_2	163	VFG001855	550	8.2e-63	74.5	VFG001855 (htpB) Hsp60, 60K heat shock protein HtpB Hsp60 (VF0159)	Legionella pneumophila subsp. pneumophila str. Philadelphia 1
scaffold_20865_1	252	VFG001855	550	4.2e-98	74.1	VFG001855 (htpB) Hsp60, 60K heat shock protein HtpB Hsp60 (VF0159)	Legionella pneumophila subsp. pneumophila str. Philadelphia 1
scaffold_21263_1	184	VFG001867	196	8.6e-77	68.3	VFG001867 (sodB) superoxide dismutase SodB (VF0169)	Legionella pneumophila subsp. pneumophila str. Philadelphia 1
scaffold_27362_1	71	VFG001867	196	3.8e-25	70.4	VFG001867 (sodB) superoxide dismutase SodB (VF0169)	Legionella pneumophila subsp. pneumophila str. Philadelphia 1
scaffold_27917_1	141	VFG001855	550	1.7e-53	71.6	VFG001855 (htpB) Hsp60, 60K heat shock protein HtpB Hsp60 (VF0159)	Legionella pneumophila subsp. pneumophila str. Philadelphia 1
scaffold_34088_1	179	VFG010882	650	2.1e-64	60.9	VFG010882 (ccmF) cytochrome c heme lyase subunit CcmF Cytochrome c muturation (ccm) locus (CVF358)	Legionella pneumophila subsp. pneumophila str. Philadelphia 1
scaffold_35816_2	86	VFG001867	196	2.6e-23	63.2	VFG001867 (sodB) superoxide dismutase SodB (VF0169)	Legionella pneumophila subsp. pneumophila str. Philadelphia 1
scaffold_37041_1	169	VFG001867	196	1.4e-70	68.5	VFG001867 (sodB) superoxide dismutase SodB (VF0169)	Legionella pneumophila subsp. pneumophila str. Philadelphia 1
scaffold_37951_1	168	VFG001855	550	4.8e-58	70.9	VFG001855 (htpB) Hsp60, 60K heat shock protein HtpB Hsp60 (VF0159)	Legionella pneumophila subsp. pneumophila str. Philadelphia 1
scaffold_40022_1	162	VFG001855	550	1.2e-53	73.8	VFG001855 (htpB) Hsp60, 60K heat shock protein HtpB Hsp60 (VF0159)	Legionella pneumophila subsp. pneumophila str. Philadelphia 1
scaffold_49347_1	142	VFG001862	731	1.1e-47	65.2	VFG001862 (katB) catalase-peroxidase KatB KatAB (VF0168)	Legionella pneumophila subsp. pneumophila str. Philadelphia 1
scaffold_55704_1	131	VFG001876	494	3.0e-39	64.3	VFG001876 (lspE) general secretion pathway protein E <i>lsp</i> T2SS (VF0154)	Legionella pneumophila subsp. pneumophila str. Philadelphia 1
scaffold_57420_1	129	VFG001855	550	5.3e-49	75.2	VFG001855 (htpB) Hsp60, 60K heat shock protein HtpB Hsp60 (VF0159)	Legionella pneumophila subsp. pneumophila str. Philadelphia 1
scaffold_60108_1	125	VFG001855	550	1.2e-42	72.0	VFG001855 (htpB) Hsp60, 60K heat shock protein HtpB Hsp60 (VF0159)	Legionella pneumophila subsp. pneumophila str. Philadelphia 1
scaffold_60301_1	125	VFG001854	475	3.8e-28	60.6	VFG001854 (fliC) flagellin Flagella (VF0157)	Legionella pneumophila subsp. pneumophila str. Philadelphia 1
scaffold_65515_1	94	VFG001855	550	6.4e-36	80.9	VFG001855 (htpB) Hsp60, 60K heat shock protein HtpB Hsp60 (VF0159)	Legionella pneumophila subsp. pneumophila str. Philadelphia 1
scaffold_65962_1	118	VFG001867	196	5.4e-40	63.5	VFG001867 (sodB) superoxide dismutase SodB (VF0169)	Legionella pneumophila subsp. pneumophila str. Philadelphia 1
scaffold_72209_1	109	VFG041304	188	3.1e-18	60.0	VFG041304 (lirB) Dot/Icm type IV secretion system effector LirB Dot/Icm (SS047)	Legionella pneumophila subsp. pneumophila str. Philadelphia 1
scaffold_72484_1	108	VFG001855	550	3.3e-36	72.2	VFG001855 (htpB) Hsp60, 60K heat shock protein HtpB Hsp60 (VF0159)	Legionella pneumophila subsp. pneumophila str. Philadelphia 1
scaffold_1807_1	765	VFG006719	866	2.6e-292	67.7	VFG006719 (lap) hypothetical protein Listeria adhesion protein (CVF228)	Listeria innocua Clip11262
scaffold_27891_1	206	VFG006719	866	2.7e-71	63.6	VFG006719 (lap) hypothetical protein Listeria adhesion protein (CVF228)	Listeria innocua Clip11262
scaffold_27892_1	206	VFG006719	866	2.1e-71	64.1	VFG006719 (lap) hypothetical protein Listeria adhesion protein (CVF228)	Listeria innocua Clip11262
scaffold_28819_1	194	VFG006719	866	4.7e-65	66.1	VFG006719 (lap) hypothetical protein Listeria adhesion protein (CVF228)	Listeria innocua Clip11262
scaffold_36895_1	64	VFG006820	225	1.0e-16	60.0	VFG006820 (virR) hypothetical protein VirR/VirS (CVF252)	Listeria innocua Clip11262
scaffold_1501_3	874	VFG031960	866	7.4e-304	61.9	VFG031960 (lap) putative alcohol-acetaldehyde dehydrogenase Listeria adhesion protein (CVF228)	Listeria ivanovii subsp. ivanovii PAM 55
scaffold_13834_1	334	VFG031960	866	5.7e-111	62.2	VFG031960 (lap) putative alcohol-acetaldehyde dehydrogenase Listeria adhesion protein (CVF228)	Listeria ivanovii subsp. ivanovii PAM 55
scaffold_15213_1	309	VFG032200	331	9.9e-110	60.3	VFG032200 (lplA1) putative lipoate protein ligase A Lipoate protein ligase A1 (CVF238)	Listeria ivanovii subsp. ivanovii PAM 55
scaffold_18338_1	278	VFG031960	866	2.3e-110	69.8	VFG031960 (lap) putative alcohol-acetaldehyde dehydrogenase Listeria adhesion protein (CVF228)	Listeria ivanovii subsp. ivanovii PAM 55
scaffold_43593_1	154	VFG031960	866	3.8e-46	60.4	VFG031960 (lap) putative alcohol-acetaldehyde dehydrogenase Listeria adhesion protein (CVF228)	Listeria ivanovii subsp. ivanovii PAM 55
scaffold_74981_1	105	VFG032200	331	3.6e-35	74.0	VFG032200 (lplA1) putative lipoate protein ligase A Lipoate protein ligase A1 (CVF238)	Listeria ivanovii subsp. ivanovii PAM 55
scaffold_3_173	192	VFG000077	198	1.1e-69	67.6	VFG000077 (clpP) ATP-dependent Clp protease proteolytic subunit ClpP (VF0074)	Listeria monocytogenes EGD-e
scaffold_85_22	192	VFG000077	198	9.9e-68	64.9	VFG000077 (clpP) ATP-dependent Clp protease proteolytic subunit ClpP (VF0074)	Listeria monocytogenes EGD-e
scaffold_211_10	208	VFG000077	198	5.7e-69	62.2	VFG000077 (clpP) ATP-dependent Clp protease proteolytic subunit ClpP (VF0074)	Listeria monocytogenes EGD-e
scaffold_238_14	196	VFG000077	198	2.6e-71	66.3	VFG000077 (clpP) ATP-dependent Clp protease proteolytic subunit ClpP (VF0074)	Listeria monocytogenes EGD-e
scaffold_1069_2	195	VFG000077	198	3.4e-71	66.7	VFG000077 (clpP) ATP-dependent Clp protease proteolytic subunit ClpP (VF0074)	Listeria monocytogenes EGD-e
scaffold_1071_4	195	VFG000077	198	1.5e-71	67.2	VFG000077 (clpP) ATP-dependent Clp protease proteolytic subunit ClpP (VF0074)	Listeria monocytogenes EGD-e
scaffold_1117_6	199	VFG000077	198	3.9e-67	64.1	VFG000077 (clpP) ATP-dependent Clp protease proteolytic subunit ClpP (VF0074)	Listeria monocytogenes EGD-e
scaffold_1662_4	197	VFG000077	198	4.1e-77	71.6	VFG000077 (clpP) ATP-dependent Clp protease proteolytic subunit ClpP (VF0074)	Listeria monocytogenes EGD-e
scaffold_4663_1	300	VFG000079	820	1.4e-113	74.3	VFG000079 (clpC) endopeptidase Clp ATP-binding chain C ClpC (VF0072)	Listeria monocytogenes EGD-e
scaffold_5033_2	388	VFG000079	820	4.4e-147	68.4	VFG000079 (clpC) endopeptidase Clp ATP-binding chain C ClpC (VF0072)	Listeria monocytogenes EGD-e
scaffold_5440_3	120	VFG006846	119	8.7e-38	63.2	VFG006846 (cheY) Chemotaxis response regulator CheY <beta>-GlcNAc (AI147)	Listeria monocytogenes EGD-e
scaffold_5470_1	120	VFG006846	119	8.7e-38	63.2	VFG006846 (cheY) Chemotaxis response regulator CheY <beta>-GlcNAc (AI147)	Listeria monocytogenes EGD-e
scaffold_5474_3	195	VFG000077	198	1.2e-60	62.2	VFG000077 (clpP) ATP-dependent Clp protease proteolytic subunit ClpP (VF0074)	Listeria monocytogenes EGD-e
scaffold_6440_1	69	VFG002160	570	3.1e-19	67.2	VFG002160 (fbpA) fibronectin-binding protein FbpA (VF0349)	Listeria monocytogenes EGD-e
scaffold_6720_2	107	VFG000077	198	2.4e-31	62.4	VFG000077 (clpP) ATP-dependent Clp protease proteolytic subunit ClpP (VF0074)	Listeria monocytogenes EGD-e
scaffold_7086_1	194	VFG000077	198	2.7e-73	69.4	VFG000077 (clpP) ATP-dependent Clp protease proteolytic subunit ClpP (VF0074)	Listeria monocytogenes EGD-e
scaffold_8666_4	125	VFG000077	198	4.6e-58	86.4	VFG000077 (clpP) ATP-dependent Clp protease proteolytic subunit ClpP (VF0074)	Listeria monocytogenes EGD-e
scaffold_11225_1	401	VFG000080	724	3.6e-144	66.9	VFG000080 (clpE) ATP-dependent protease ClpE (VF0073)	Listeria monocytogenes EGD-e
scaffold_14510_1	114	VFG000077	198	4.6e-28	63.9	VFG000077 (clpP) ATP-dependent Clp protease proteolytic subunit ClpP (VF0074)	Listeria monocytogenes EGD-e
scaffold_15371_2	121	VFG006846	119	2.0e-42	71.3	VFG006846 (cheY) Chemotaxis response regulator CheY <beta>-GlcNAc (AI147)	Listeria monocytogenes EGD-e
scaffold_16329_1	304	VFG000079	820	1.1e-134	78.9	VFG000079 (clpC) endopeptidase Clp ATP-binding chain C ClpC (VF0072)	Listeria monocytogenes EGD-e
scaffold_22087_1	243	VFG000079	820	7.3e-100	74.1	VFG000079 (clpC) endopeptidase Clp ATP-binding chain C ClpC (VF0072)	Listeria monocytogenes EGD-e
scaffold_22818_1	94	VFG000077	198	1.9e-32	67.8	VFG000077 (clpP) ATP-dependent Clp protease proteolytic subunit ClpP (VF0074)	Listeria monocytogenes EGD-e
scaffold_23563_1	232	VFG000079	820	2.0e-78	62.9	VFG000079 (clpC) endopeptidase Clp ATP-binding chain C ClpC (VF0072)	Listeria monocytogenes EGD-e
scaffold_24168_1	228	VFG000079	820	2.7e-88	71.1	VFG000079 (clpC) endopeptidase Clp ATP-binding chain C ClpC (VF0072)	Listeria monocytogenes EGD-e
scaffold_24475_1	225	VFG000080	724	5.1e-71	62.8	VFG000080 (clpE) ATP-dependent protease ClpE (VF0073)	Listeria monocytogenes EGD-e
scaffold_25151_1	221	VFG000079	820	4.1e-73	61.5	VFG000079 (clpC) endopeptidase Clp ATP-binding chain C ClpC (VF0072)	Listeria monocytogenes EGD-e
scaffold_26299_1	214	VFG000079	820	1.0e-81	68.5	VFG000079 (clpC) endopeptidase Clp ATP-binding chain C ClpC (VF0072)	Listeria monocytogenes EGD-e
scaffold_27123_1	210	VFG000079	820	7.2e-88	80.9	VFG000079 (clpC) endopeptidase Clp ATP-binding chain C ClpC (VF0072)	Listeria monocytogenes EGD-e
scaffold_30418_1	152	VFG000079	820	5.7e-58	79.6	VFG000079 (clpC) endopeptidase Clp ATP-binding chain C ClpC (VF0072)	Listeria monocytogenes EGD-e
scaffold_31699_1	74	VFG043257	302	1.7e-20	63.9	VFG043257 (cheV) hypothetical protein <beta>-GlcNAc (AI147)	Listeria monocytogenes EGD-e
scaffold_36346_1	173	VFG000079	820	8.4e-66	72.3	VFG000079 (clpC) endopeptidase Clp ATP-binding chain C ClpC (VF0072)	Listeria monocytogenes EGD-e
scaffold_38152_1	167	VFG000079	820	9.3e-54	62.9	VFG000079 (clpC) endopeptidase Clp ATP-binding chain C ClpC (VF0072)	Listeria monocytogenes EGD-e
scaffold_38289_1	167	VFG000079	820	6.4e-79	86.2	VFG000079 (clpC) endopeptidase Clp ATP-binding chain C ClpC (VF0072)	Listeria monocytogenes EGD-e
scaffold_41259_1	159	VFG000079	820	4.0e-54	63.7	VFG000079 (clpC) endopeptidase Clp ATP-binding chain C ClpC (VF0072)	Listeria monocytogenes EGD-e
scaffold_42415_2	42	VFG006794	252	1.1e-11	61.9	VFG006794 (stp) hypothetical protein Serine-threonine phosphatase (CVF245)	Listeria monocytogenes EGD-e
scaffold_47263_1	134	VFG000077	198	3.3e-46	61.2	VFG000077 (clpP) ATP-dependent Clp protease proteolytic subunit ClpP (VF0074)	Listeria monocytogenes EGD-e
scaffold_48446_1	144	VFG006717	866	7.7e-57	75.0	VFG006717 (lap) Listeria adhesion protein Lap Lap (VF0444)	Listeria monocytogenes EGD-e
scaffold_49219_1	116	VFG000077	198	9.3e-37	68.9	VFG000077 (clpP) ATP-dependent Clp protease proteolytic subunit ClpP (VF0074)	Listeria monocytogenes EGD-e
scaffold_51867_1	138	VFG000077	198	4.4e-33	64.6	VFG000077 (clpP) ATP-dependent Clp protease proteolytic subunit ClpP (VF0074)	Listeria monocytogenes EGD-e
scaffold_53661_1	113	VFG000077	198	2.6e-39	68.8	VFG000077 (clpP) ATP-dependent Clp protease proteolytic subunit ClpP (VF0074)	Listeria monocytogenes EGD-e
scaffold_55839_1	131	VFG000079	820	2.0e-56	74.8	VFG000079 (clpC) endopeptidase Clp ATP-binding chain C ClpC (VF0072)	Listeria monocytogenes EGD-e
scaffold_56441_1	130	VFG000079	820	6.8e-52	75.8	VFG000079 (clpC) endopeptidase Clp ATP-binding chain C ClpC (VF0072)	Listeria monocytogenes EGD-e
scaffold_56480_1	131	VFG000080	724	2.8e-45	72.8	VFG000080 (clpE) ATP-dependent protease ClpE (VF0073)	Listeria monocytogenes EGD-e
scaffold_58717_1	62	VFG000079	820	8.9e-18	66.1	VFG000079 (clpC) endopeptidase Clp ATP-binding chain C ClpC (VF0072)	Listeria monocytogenes EGD-e
scaffold_59151_1	107	VFG000077	198	1.7e-37	66.7	VFG000077 (clpP) ATP-dependent Clp protease proteolytic subunit ClpP (VF0074)	Listeria monocytogenes EGD-e
scaffold_62864_1	122	VFG000080	724	4.3e-32	63.3	VFG000080 (clpE) ATP-dependent protease ClpE (VF0073)	Listeria monocytogenes EGD-e
scaffold_63338_1	121	VFG000080	724	3.5e-34	69.6	VFG000080 (clpE) ATP-dependent protease ClpE (VF0073)	Listeria monocytogenes EGD-e
scaffold_63957_1	120	VFG000079	820	1.2e-42	65.8	VFG000079 (clpC) endopeptidase Clp ATP-binding chain C ClpC (VF0072)	Listeria monocytogenes EGD-e
scaffold_64107_1	117	VFG000077	198	1.2e-36	62.4	VFG000077 (clpP) ATP-dependent Clp protease proteolytic subunit ClpP (VF0074)	Listeria monocytogenes EGD-e
scaffold_68324_1	114	VFG000079	820	5.8e-23	61.7	VFG000079 (clpC) endopeptidase Clp ATP-binding chain C ClpC (VF0072)	Listeria monocytogenes EGD-e
scaffold_68408_1	114	VFG000079	820	1.5e-42	69.3	VFG000079 (clpC) endopeptidase Clp ATP-binding chain C ClpC (VF0072)	Listeria monocytogenes EGD-e
scaffold_68478_1	114	VFG000079	820	2.4e-53	87.7	VFG000079 (clpC) endopeptidase Clp ATP-binding chain C ClpC (VF0072)	Listeria monocytogenes EGD-e
scaffold_70702_1	99	VFG006826	226	3.6e-29	60.6	VFG006826 (lisR) two-component response regulator LisR/LisK (CVF253)	Listeria monocytogenes EGD-e
scaffold_71870_1	109	VFG006826	226	8.2e-27	62.1	VFG006826 (lisR) two-component response regulator LisR/LisK (CVF253)	Listeria monocytogenes EGD-e
scaffold_73672_1	107	VFG000080	724	6.4e-48	82.2	VFG000080 (clpE) ATP-dependent protease ClpE (VF0073)	Listeria monocytogenes EGD-e
scaffold_73935_1	107	VFG001089	461	1.0e-37	64.5	VFG001089 (hpt) hexose phosphate transport protein Hpt (VF0264)	Listeria monocytogenes EGD-e
scaffold_76216_1	103	VFG000079	820	1.4e-28	61.2	VFG000079 (clpC) endopeptidase Clp ATP-binding chain C ClpC (VF0072)	Listeria monocytogenes EGD-e
scaffold_77516_1	102	VFG000079	820	1.5e-43	80.4	VFG000079 (clpC) endopeptidase Clp ATP-binding chain C ClpC (VF0072)	Listeria monocytogenes EGD-e
scaffold_78017_1	101	VFG000080	724	5.3e-44	90.4	VFG000080 (clpE) ATP-dependent protease ClpE (VF0073)	Listeria monocytogenes EGD-e
scaffold_78325_1	100	VFG000077	198	2.8e-37	73.0	VFG000077 (clpP) ATP-dependent Clp protease proteolytic subunit ClpP (VF0074)	Listeria monocytogenes EGD-e
scaffold_78350_1	100	VFG000079	820	7.8e-32	66.3	VFG000079 (clpC) endopeptidase Clp ATP-binding chain C ClpC (VF0072)	Listeria monocytogenes EGD-e
scaffold_66979_1	116	VFG032463	277	5.0e-38	60.7	VFG032463 (lgt) prolipoprotein diacylglyceryl transferase Lipoprotein diacylglyceryl transferase (CVF248)	Listeria monocytogenes J1-220
scaffold_17914_1	284	VFG006718	866	5.5e-107	67.3	VFG006718 (lap) aldehyde-alcohol dehydrogenase Listeria adhesion protein (CVF228)	Listeria monocytogenes serotype 4b str. F2365
scaffold_57571_1	128	VFG032467	277	1.9e-54	74.2	VFG032467 (lgt) prolipoprotein diacylglyceryl transferase Lipoprotein diacylglyceryl transferase (CVF248)	Listeria seeligeri serovar 1/2b str. SLCC3954
scaffold_2383_6	481	VFG006720	866	1.1e-168	64.2	VFG006720 (lap) aldehyde-alcohol dehydrogenase protein Listeria adhesion protein (CVF228)	Listeria welshimeri serovar 6b str. SLCC5334
scaffold_2445_5	425	VFG006720	866	1.8e-146	63.7	VFG006720 (lap) aldehyde-alcohol dehydrogenase protein Listeria adhesion protein (CVF228)	Listeria welshimeri serovar 6b str. SLCC5334
scaffold_12455_1	296	VFG006720	866	2.1e-96	64.1	VFG006720 (lap) aldehyde-alcohol dehydrogenase protein Listeria adhesion protein (CVF228)	Listeria welshimeri serovar 6b str. SLCC5334
scaffold_13053_1	300	VFG006777	331	1.5e-107	61.3	VFG006777 (lplA1) lipoyltransferase and lipoate-protein ligase family protein Lipoate protein ligase A1 (CVF238)	Listeria welshimeri serovar 6b str. SLCC5334
scaffold_22170_1	155	VFG006720	866	2.7e-55	68.6	VFG006720 (lap) aldehyde-alcohol dehydrogenase protein Listeria adhesion protein (CVF228)	Listeria welshimeri serovar 6b str. SLCC5334
scaffold_23270_1	234	VFG006720	866	4.4e-78	65.0	VFG006720 (lap) aldehyde-alcohol dehydrogenase protein Listeria adhesion protein (CVF228)	Listeria welshimeri serovar 6b str. SLCC5334
scaffold_23476_1	232	VFG006720	866	5.6e-81	65.9	VFG006720 (lap) aldehyde-alcohol dehydrogenase protein Listeria adhesion protein (CVF228)	Listeria welshimeri serovar 6b str. SLCC5334
scaffold_32675_1	264	VFG006720	866	2.2e-86	62.0	VFG006720 (lap) aldehyde-alcohol dehydrogenase protein Listeria adhesion protein (CVF228)	Listeria welshimeri serovar 6b str. SLCC5334
scaffold_32840_1	121	VFG006777	331	1.4e-46	67.8	VFG006777 (lplA1) lipoyltransferase and lipoate-protein ligase family protein Lipoate protein ligase A1 (CVF238)	Listeria welshimeri serovar 6b str. SLCC5334
scaffold_38380_1	166	VFG006720	866	2.4e-54	63.9	VFG006720 (lap) aldehyde-alcohol dehydrogenase protein Listeria adhesion protein (CVF228)	Listeria welshimeri serovar 6b str. SLCC5334
scaffold_9794_2	342	VFG044440	314	2.7e-92	61.7	VFG044440 (huvC) HuvC protein direct heme uptake system (IA065)	Listonella anguillarum H775-3
scaffold_27244_1	209	VFG043991	506	1.2e-79	68.8	VFG043991 (Bsph_4094) sphaericolysin sphaericolysin (SPH) (TX398)	Lysinibacillus sphaericus C3-41
scaffold_12375_2	198	VFG042826	473	1.1e-66	68.3	VFG042826 (pilQ) type IV pilus secretin PilQ type IV pili (AI108)	Moraxella catarrhalis RH4
scaffold_31107_1	191	VFG043580	453	1.2e-52	61.0	VFG043580 (MCR_1698) outer membrane protein CD TaaP (AI399)	Moraxella catarrhalis RH4
scaffold_62054_1	122	VFG043580	453	3.2e-43	69.4	VFG043580 (MCR_1698) outer membrane protein CD TaaP (AI399)	Moraxella catarrhalis RH4
scaffold_36720_1	172	VFG030686	391	3.6e-45	64.6	VFG030686 (sugC) Probable sugar ABC transporter, ATP-binding protein SugC Trehalose-recycling ABC transporter (CVF651)	Mycobacterium abscessus ATCC 19977
scaffold_51610_1	138	VFG030686	391	1.1e-41	60.1	VFG030686 (sugC) Probable sugar ABC transporter, ATP-binding protein SugC Trehalose-recycling ABC transporter (CVF651)	Mycobacterium abscessus ATCC 19977
scaffold_59356_1	82	VFG022664	478	3.2e-23	60.5	VFG022664 (glnA1) glutamine synthetase, type I (GlnA1) Glutamine synthesis (CVF311)	Mycobacterium abscessus ATCC 19977
scaffold_69205_1	113	VFG022633	299	3.7e-30	62.6	VFG022633 (proC) pyrroline-5-carboxylate reductase Proline synthesis (CVF307)	Mycobacterium abscessus ATCC 19977
scaffold_69775_1	112	VFG022965	788	4.8e-38	68.8	VFG022965 (relA) GTP pyrophosphokinase (p)ppGpp synthesis and hydrolysis (CVF335)	Mycobacterium abscessus ATCC 19977
scaffold_73080_1	100	VFG022883	235	1.1e-33	75.0	VFG022883 (sigH) RNA polymerase sigma-E factor Sigma H (CVF328)	Mycobacterium abscessus ATCC 19977
scaffold_78697_1	100	VFG023418	1311	5.6e-38	80.4	VFG023418 (eccC4) putative FtsK/SpoIIIE family protein ESX-4 (T7SS) (CVF636)	Mycobacterium abscessus ATCC 19977
scaffold_81816_1	71	VFG030686	391	4.4e-21	62.0	VFG030686 (sugC) Probable sugar ABC transporter, ATP-binding protein SugC Trehalose-recycling ABC transporter (CVF651)	Mycobacterium abscessus ATCC 19977
scaffold_51535_1	138	VFG030700	391	2.0e-41	61.5	VFG030700 (sugC) sugar ABC transporter ATP-binding protein SugC Trehalose-recycling ABC transporter (CVF651)	Mycobacterium abscessus subsp. bolletii 50594
scaffold_61468_1	98	VFG008112	141	8.8e-28	60.6	VFG008112 (panD) aspartate 1-decarboxylase Pantothenate synthesis (CVF305)	Mycobacterium abscessus subsp. bolletii 50594
scaffold_64285_2	65	VFG008088	310	1.4e-18	66.1	VFG008088 (panC) pantoate--beta-alanine ligase Pantothenate synthesis (CVF305)	Mycobacterium abscessus subsp. bolletii 50594
scaffold_78467_1	101	VFG028282	376	2.4e-36	73.0	VFG028282 (espI) ESX-1 secretion-associated protein EspI ESX-1 (T7SS) (CVF298)	Mycobacterium abscessus subsp. bolletii str. GO 06
scaffold_185_4	355	VFG009715	496	2.1e-95	62.0	VFG009715 (sigA/rpoV) sigma factor MysA Sigma A (CVF325)	Mycobacterium avium 104
scaffold_80199_1	54	VFG031039	662	2.7e-18	75.5	VFG031039 (zmp1) peptidase M13 Zn++ metallophrotease (CVF655)	Mycobacterium avium 104
scaffold_5700_1	82	VFG030675	392	4.9e-24	63.4	VFG030675 (sugC) SugC Trehalose-recycling ABC transporter (CVF651)	Mycobacterium avium subsp. paratuberculosis K-10
scaffold_61662_1	123	VFG009729	262	6.4e-36	60.2	VFG009729 (sigF) sigma factor SigF Sigma F (CVF326)	Mycobacterium avium subsp. paratuberculosis K-10
scaffold_5152_2	129	VFG007787	143	2.6e-32	60.6	VFG007787 (panD) aspartate 1-decarboxylase precursor panD Pantothenate synthesis (CVF305)	Mycobacterium avium subsp. paratuberculosis MAP4
scaffold_53855_1	135	VFG023861	418	2.8e-32	61.5	VFG023861 (Mb2977) hypothetical protein PDIM (phthiocerol dimycocerosate) and PGL (phenolic glycolipid) biosynthesis and transport (CVF288)	Mycobacterium bovis AF2122/97
scaffold_61072_1	124	VFG023434	455	1.1e-24	65.3	VFG023434 (mycP4) putative membrane-anchored mycosin MYCP4 ESX-4 (T7SS) (CVF636)	Mycobacterium canettii CIPT 140010059
scaffold_7180_1	117	VFG008113	139	1.5e-29	61.0	VFG008113 (panD) Aspartate 1-Decarboxylase precursor panD (Aspartate Alpha-Decarboxylase) Pantothenate synthesis (CVF305)	Mycobacterium canettii CIPT 140060008
scaffold_40796_1	161	VFG030704	393	1.1e-56	69.6	VFG030704 (sugC) Putative sugar-transport ATP-binding protein ABC transporter SugC Trehalose-recycling ABC transporter (CVF651)	Mycobacterium canettii CIPT 140070017
scaffold_2044_1	88	VFG030678	409	1.8e-27	61.4	VFG030678 (sugC) ABC transporter-like protein Trehalose-recycling ABC transporter (CVF651)	Mycobacterium gilvum PYR-GCK
scaffold_4054_3	432	VFG009267	428	1.2e-156	65.1	VFG009267 (icl) isocitrate lyase Isocitrate lyase (CVF302)	Mycobacterium gilvum PYR-GCK
scaffold_6929_2	218	VFG009596	1233	2.5e-75	61.8	VFG009596 (narG) nitrate reductase, alpha subunit Nitrate reductase (CVF318)	Mycobacterium gilvum PYR-GCK
scaffold_62470_1	95	VFG030678	409	4.8e-31	62.1	VFG030678 (sugC) ABC transporter-like protein Trehalose-recycling ABC transporter (CVF651)	Mycobacterium gilvum PYR-GCK
scaffold_68602_1	114	VFG009596	1233	1.0e-56	81.6	VFG009596 (narG) nitrate reductase, alpha subunit Nitrate reductase (CVF318)	Mycobacterium gilvum PYR-GCK
scaffold_17041_1	252	VFG024074	1233	2.4e-90	61.9	VFG024074 (narG) respiratory nitrate reductase subunit alpha Nitrate reductase (CVF318)	Mycobacterium gilvum Spyr1
scaffold_48944_1	61	VFG029506	287	1.3e-24	80.3	VFG029506 (rmlA) glucose-1-phosphate thymidylyltransferase GPL locus (CVF650)	Mycobacterium gilvum Spyr1
scaffold_75002_1	105	VFG023960	472	1.7e-32	67.6	VFG023960 (lysA) diaminopimelate decarboxylase Lysine synthesis (CVF310)	Mycobacterium gilvum Spyr1
scaffold_50_1	53	VFG030695	392	7.8e-15	62.3	VFG030695 (sugC) maltodextrin import ATP-binding protein msmX Trehalose-recycling ABC transporter (CVF651)	Mycobacterium indicus pranii MTCC 9506
scaffold_43861_1	153	VFG031402	772	1.3e-49	63.4	VFG031402 (ctpV) cation-transporting ATPase V Copper exporter (CVF658)	Mycobacterium indicus pranii MTCC 9506
scaffold_70518_1	52	VFG031402	772	5.9e-15	83.0	VFG031402 (ctpV) cation-transporting ATPase V Copper exporter (CVF658)	Mycobacterium indicus pranii MTCC 9506
scaffold_55385_1	132	VFG030673	392	5.5e-25	62.2	VFG030673 (sugC) ABC transporter ATP-binding protein Trehalose-recycling ABC transporter (CVF651)	Mycobacterium leprae TN
scaffold_81938_1	61	VFG030673	392	3.9e-18	64.4	VFG030673 (sugC) ABC transporter ATP-binding protein Trehalose-recycling ABC transporter (CVF651)	Mycobacterium leprae TN
scaffold_27164_1	209	VFG031409	675	1.5e-56	60.8	VFG031409 (ctpV) metal cation transporter p-type ATPase, CtpV Copper exporter (CVF658)	Mycobacterium liflandii 128FXT
scaffold_65265_1	119	VFG026869	708	5.6e-37	63.9	VFG026869 (katG) catalase-peroxidase-peroxynitritase T KatG Catalase-peroxidase (CVF321)	Mycobacterium liflandii 128FXT
scaffold_53902_1	134	VFG031400	812	6.8e-39	64.9	VFG031400 (ctpV) cation transport ATPase, ZntA Copper exporter (CVF658)	Mycobacterium marinum M
scaffold_65058_1	118	VFG030301	369	5.9e-63	91.5	VFG030301 (adhD) zinc-containing alcohol dehydrogenase NAD- dependent, AdhD MymA operon (CVF649)	Mycobacterium marinum M
scaffold_504_1	207	VFG030724	404	9.7e-77	71.5	VFG030724 (sugC) carbohydrate ABC transporter ATP-binding protein, CUT1 family Trehalose-recycling ABC transporter (CVF651)	Mycobacterium smegmatis JS623
scaffold_36115_1	174	VFG030724	404	2.7e-48	64.2	VFG030724 (sugC) carbohydrate ABC transporter ATP-binding protein, CUT1 family Trehalose-recycling ABC transporter (CVF651)	Mycobacterium smegmatis JS623
scaffold_36289_1	173	VFG030724	404	5.1e-55	67.5	VFG030724 (sugC) carbohydrate ABC transporter ATP-binding protein, CUT1 family Trehalose-recycling ABC transporter (CVF651)	Mycobacterium smegmatis JS623
scaffold_38198_1	167	VFG030724	404	3.3e-51	60.5	VFG030724 (sugC) carbohydrate ABC transporter ATP-binding protein, CUT1 family Trehalose-recycling ABC transporter (CVF651)	Mycobacterium smegmatis JS623
scaffold_56190_1	131	VFG009119	777	6.0e-32	62.4	VFG009119 (secA2) preprotein translocase subunit SecA (ATPase, RNA helicase) Accessory secretion factor (CVF299)	Mycobacterium smegmatis JS623
scaffold_58875_1	127	VFG027926	799	3.0e-36	62.4	VFG027926 (nuoG) NADH dehydrogenase subunit G NuoG (CVF620)	Mycobacterium smegmatis JS623
scaffold_58881_1	55	VFG029754	137	2.1e-23	87.0	VFG029754 (Mycsm_06404) hypothetical protein GPL locus (CVF650)	Mycobacterium smegmatis JS623
scaffold_70399_1	111	VFG030724	404	1.9e-39	72.7	VFG030724 (sugC) carbohydrate ABC transporter ATP-binding protein, CUT1 family Trehalose-recycling ABC transporter (CVF651)	Mycobacterium smegmatis JS623
scaffold_79182_1	100	VFG027322	782	1.3e-23	60.7	VFG027322 (relA) (p)ppGpp synthetase, RelA/SpoT family (p)ppGpp synthesis and hydrolysis (CVF335)	Mycobacterium smegmatis JS623
scaffold_46302_1	148	VFG009608	548	1.4e-56	64.6	VFG009608 (narH) nitrate reductase, beta subunit Nitrate reductase (CVF318)	Mycobacterium smegmatis str. MC2 155
scaffold_49399_1	97	VFG009608	548	1.6e-42	77.3	VFG009608 (narH) nitrate reductase, beta subunit Nitrate reductase (CVF318)	Mycobacterium smegmatis str. MC2 155
scaffold_49399_2	45	VFG009595	1224	9.6e-14	70.5	VFG009595 (narG) nitrate reductase, alpha subunit Nitrate reductase (CVF318)	Mycobacterium smegmatis str. MC2 155
scaffold_49850_1	141	VFG029769	611	1.2e-62	80.0	VFG029769 (fadE5) acyl-CoA dehydrogenase GPL locus (CVF650)	Mycobacterium smegmatis str. MC2 155
scaffold_50403_1	56	VFG009732	250	2.8e-15	73.6	VFG009732 (sigF) RNA polymerase sigma-F factor Sigma F (CVF326)	Mycobacterium smegmatis str. MC2 155
scaffold_70578_1	112	VFG009406	478	7.2e-34	60.2	VFG009406 (glnA1) glutamine synthetase, type I Glutamine synthesis (CVF311)	Mycobacterium smegmatis str. MC2 155
scaffold_126_25	437	VFG022587	428	6.0e-145	60.5	VFG022587 (icl) isocitrate lyase Icl Isocitrate lyase (CVF302)	Mycobacterium sp. JDM601
scaffold_530_13	207	VFG030692	380	2.2e-76	70.5	VFG030692 (sugC) sugar ABC transporter Trehalose-recycling ABC transporter (CVF651)	Mycobacterium sp. JDM601
scaffold_1917_5	70	VFG030692	380	1.5e-21	71.0	VFG030692 (sugC) sugar ABC transporter Trehalose-recycling ABC transporter (CVF651)	Mycobacterium sp. JDM601
scaffold_4080_2	536	VFG022803	533	2.9e-181	60.8	VFG022803 (narH) NarH Nitrate reductase (CVF318)	Mycobacterium sp. JDM601
scaffold_37491_1	169	VFG022798	1240	1.0e-60	62.1	VFG022798 (narG) respiratory nitrate reductase subunit alpha narG Nitrate reductase (CVF318)	Mycobacterium sp. JDM601
scaffold_44204_1	152	VFG030692	380	1.1e-29	63.8	VFG030692 (sugC) sugar ABC transporter Trehalose-recycling ABC transporter (CVF651)	Mycobacterium sp. JDM601
scaffold_54393_1	74	VFG022798	1240	5.1e-20	62.5	VFG022798 (narG) respiratory nitrate reductase subunit alpha narG Nitrate reductase (CVF318)	Mycobacterium sp. JDM601
scaffold_61464_1	65	VFG031691	393	1.7e-11	63.0	VFG031691 (senX3) two-component sensor histidine kinase SenX3 (CVF666)	Mycobacterium sp. JDM601
scaffold_73955_1	107	VFG029783	614	2.5e-52	92.5	VFG029783 (fadE5) acyl-CoA dehydrogenase GPL locus (CVF650)	Mycobacterium sp. JDM601
scaffold_77848_1	101	VFG022587	428	1.8e-31	63.0	VFG022587 (icl) isocitrate lyase Icl Isocitrate lyase (CVF302)	Mycobacterium sp. JDM601
scaffold_80350_1	98	VFG022670	474	1.6e-45	82.7	VFG022670 (glnA1) glutamine synthetase Glutamine synthesis (CVF311)	Mycobacterium sp. JDM601
scaffold_81123_1	97	VFG030692	380	1.1e-27	65.9	VFG030692 (sugC) sugar ABC transporter Trehalose-recycling ABC transporter (CVF651)	Mycobacterium sp. JDM601
scaffold_428_1	53	VFG030680	405	1.3e-14	64.2	VFG030680 (sugC) ABC transporter-like protein Trehalose-recycling ABC transporter (CVF651)	Mycobacterium sp. JLS
scaffold_851_10	190	VFG030680	405	1.6e-70	70.9	VFG030680 (sugC) ABC transporter-like protein Trehalose-recycling ABC transporter (CVF651)	Mycobacterium sp. JLS
scaffold_886_5	349	VFG030680	405	1.5e-77	60.6	VFG030680 (sugC) ABC transporter-like protein Trehalose-recycling ABC transporter (CVF651)	Mycobacterium sp. JLS
scaffold_20678_1	217	VFG030680	405	1.1e-78	68.5	VFG030680 (sugC) ABC transporter-like protein Trehalose-recycling ABC transporter (CVF651)	Mycobacterium sp. JLS
scaffold_20726_1	216	VFG030680	405	8.3e-79	68.5	VFG030680 (sugC) ABC transporter-like protein Trehalose-recycling ABC transporter (CVF651)	Mycobacterium sp. JLS
scaffold_44304_1	134	VFG009764	237	3.6e-40	72.1	VFG009764 (sigH) RNA polymerase, sigma-24 subunit, ECF subfamily Sigma H (CVF328)	Mycobacterium sp. JLS
scaffold_57599_1	129	VFG009598	1227	6.7e-44	61.2	VFG009598 (narG) nitrate reductase, alpha subunit Nitrate reductase (CVF318)	Mycobacterium sp. JLS
scaffold_61464_2	60	VFG031731	228	2.4e-20	76.7	VFG031731 (regX3) two component transcriptional regulator RegX3 (CVF667)	Mycobacterium sp. JLS
scaffold_66676_1	117	VFG009735	263	6.3e-33	62.2	VFG009735 (sigF) RNA polymerase, sigma 28 subunit, FliA/WhiG family Sigma F (CVF326)	Mycobacterium sp. JLS
scaffold_78546_1	100	VFG009668	749	1.4e-28	60.2	VFG009668 (katG) catalase/peroxidase HPI Catalase-peroxidase (CVF321)	Mycobacterium sp. JLS
scaffold_882_8	117	VFG008123	413	3.0e-19	61.5	VFG008123 (panD) pantothenate kinase Pantothenate synthesis (CVF305)	Mycobacterium tuberculosis CCDC5079
scaffold_12653_1	127	VFG008123	413	2.1e-21	62.2	VFG008123 (panD) pantothenate kinase Pantothenate synthesis (CVF305)	Mycobacterium tuberculosis CCDC5079
scaffold_39417_1	125	VFG026455	202	2.0e-24	63.9	VFG026455 (mgtC) Mg2+ transport ATPase C mgtC Magnesium transport (CVF313)	Mycobacterium tuberculosis CCDC5180
scaffold_717_1	70	VFG001405	528	9.0e-19	67.2	VFG001405 (sigA/rpoV) RNA polymerase sigma factor SigA (VF0257)	Mycobacterium tuberculosis H37Rv
scaffold_1937_3	385	VFG001405	528	2.1e-93	60.7	VFG001405 (sigA/rpoV) RNA polymerase sigma factor SigA (VF0257)	Mycobacterium tuberculosis H37Rv
scaffold_2028_3	362	VFG001405	528	3.1e-94	61.1	VFG001405 (sigA/rpoV) RNA polymerase sigma factor SigA (VF0257)	Mycobacterium tuberculosis H37Rv
scaffold_2704_2	727	VFG043448	741	1.7e-256	60.5	VFG043448 (Rv1837c) malate synthase G Fibronectin-binding protein (AI169)	Mycobacterium tuberculosis H37Rv
scaffold_3349_1	70	VFG001405	528	9.0e-19	67.2	VFG001405 (sigA/rpoV) RNA polymerase sigma factor SigA (VF0257)	Mycobacterium tuberculosis H37Rv
scaffold_4753_3	196	VFG001405	528	3.2e-69	67.2	VFG001405 (sigA/rpoV) RNA polymerase sigma factor SigA (VF0257)	Mycobacterium tuberculosis H37Rv
scaffold_5535_2	362	VFG001405	528	1.1e-94	61.4	VFG001405 (sigA/rpoV) RNA polymerase sigma factor SigA (VF0257)	Mycobacterium tuberculosis H37Rv
scaffold_5886_1	222	VFG043448	741	9.1e-73	60.8	VFG043448 (Rv1837c) malate synthase G Fibronectin-binding protein (AI169)	Mycobacterium tuberculosis H37Rv
scaffold_10478_3	87	VFG001405	528	6.4e-22	62.5	VFG001405 (sigA/rpoV) RNA polymerase sigma factor SigA (VF0257)	Mycobacterium tuberculosis H37Rv
scaffold_14283_1	326	VFG001405	528	4.6e-81	61.0	VFG001405 (sigA/rpoV) RNA polymerase sigma factor SigA (VF0257)	Mycobacterium tuberculosis H37Rv
scaffold_14290_1	326	VFG001405	528	4.6e-81	61.0	VFG001405 (sigA/rpoV) RNA polymerase sigma factor SigA (VF0257)	Mycobacterium tuberculosis H37Rv
scaffold_20560_1	255	VFG043448	741	2.2e-102	70.9	VFG043448 (Rv1837c) malate synthase G Fibronectin-binding protein (AI169)	Mycobacterium tuberculosis H37Rv
scaffold_21080_1	251	VFG043448	741	7.4e-71	60.4	VFG043448 (Rv1837c) malate synthase G Fibronectin-binding protein (AI169)	Mycobacterium tuberculosis H37Rv
scaffold_21312_1	56	VFG001814	558	9.1e-22	70.4	VFG001814 (narH) PROBABLE RESPIRATORY NITRATE REDUCTASE (BETA CHAIN) NARH Nitrate reductase (VF0302)	Mycobacterium tuberculosis H37Rv
scaffold_21633_1	247	VFG043550	540	2.3e-85	70.0	VFG043550 (Rv0440) chaperonin GroEL GroEL(Hsp60)/Cpn60.2 (AI353)	Mycobacterium tuberculosis H37Rv
scaffold_23457_1	96	VFG043448	741	7.0e-30	69.3	VFG043448 (Rv1837c) malate synthase G Fibronectin-binding protein (AI169)	Mycobacterium tuberculosis H37Rv
scaffold_33133_1	130	VFG031390	770	1.2e-35	65.5	VFG031390 (ctpV) Probable metal cation transporter P-type ATPase CtpV Copper exporter (CVF658)	Mycobacterium tuberculosis H37Rv
scaffold_33941_1	169	VFG001405	528	6.9e-57	66.1	VFG001405 (sigA/rpoV) RNA polymerase sigma factor SigA (VF0257)	Mycobacterium tuberculosis H37Rv
scaffold_34729_1	178	VFG043448	741	5.4e-60	62.4	VFG043448 (Rv1837c) malate synthase G Fibronectin-binding protein (AI169)	Mycobacterium tuberculosis H37Rv
scaffold_36791_1	95	VFG001405	528	1.2e-26	61.7	VFG001405 (sigA/rpoV) RNA polymerase sigma factor SigA (VF0257)	Mycobacterium tuberculosis H37Rv
scaffold_37365_1	169	VFG001405	528	6.7e-60	62.5	VFG001405 (sigA/rpoV) RNA polymerase sigma factor SigA (VF0257)	Mycobacterium tuberculosis H37Rv
scaffold_37462_1	170	VFG043550	540	1.8e-73	85.3	VFG043550 (Rv0440) chaperonin GroEL GroEL(Hsp60)/Cpn60.2 (AI353)	Mycobacterium tuberculosis H37Rv
scaffold_40662_1	161	VFG043448	741	3.8e-52	62.0	VFG043448 (Rv1837c) malate synthase G Fibronectin-binding protein (AI169)	Mycobacterium tuberculosis H37Rv
scaffold_41661_1	158	VFG001399	478	3.9e-54	62.5	VFG001399 (glnA1) GLUTAMINE SYNTHETASE GLNA1 (GLUTAMINE SYNTHASE) (GS-I) Glutamine synthesis (CVF311)	Mycobacterium tuberculosis H37Rv
scaffold_42562_1	156	VFG043448	741	8.1e-52	66.0	VFG043448 (Rv1837c) malate synthase G Fibronectin-binding protein (AI169)	Mycobacterium tuberculosis H37Rv
scaffold_43031_1	154	VFG043550	540	1.3e-62	83.1	VFG043550 (Rv0440) chaperonin GroEL GroEL(Hsp60)/Cpn60.2 (AI353)	Mycobacterium tuberculosis H37Rv
scaffold_44514_1	151	VFG043550	540	1.0e-67	90.7	VFG043550 (Rv0440) chaperonin GroEL GroEL(Hsp60)/Cpn60.2 (AI353)	Mycobacterium tuberculosis H37Rv
scaffold_46884_1	120	VFG043550	540	2.7e-39	76.3	VFG043550 (Rv0440) chaperonin GroEL GroEL(Hsp60)/Cpn60.2 (AI353)	Mycobacterium tuberculosis H37Rv
scaffold_47443_1	146	VFG043448	741	2.1e-49	65.1	VFG043448 (Rv1837c) malate synthase G Fibronectin-binding protein (AI169)	Mycobacterium tuberculosis H37Rv
scaffold_48330_1	144	VFG001396	740	2.6e-52	69.6	VFG001396 (katG) CATALASE-PEROXIDASE-PEROXYNITRITASE T KATG KatG (VF0303)	Mycobacterium tuberculosis H37Rv
scaffold_55404_1	132	VFG043448	741	1.8e-44	65.9	VFG043448 (Rv1837c) malate synthase G Fibronectin-binding protein (AI169)	Mycobacterium tuberculosis H37Rv
scaffold_57074_1	129	VFG001405	528	1.3e-50	74.4	VFG001405 (sigA/rpoV) RNA polymerase sigma factor SigA (VF0257)	Mycobacterium tuberculosis H37Rv
scaffold_57919_1	128	VFG043550	540	2.3e-52	84.4	VFG043550 (Rv0440) chaperonin GroEL GroEL(Hsp60)/Cpn60.2 (AI353)	Mycobacterium tuberculosis H37Rv
scaffold_62743_1	107	VFG031590	212	4.1e-31	68.9	VFG031590 (sigD) Probable alternative RNA polymerase sigma-D factor SigD Sigma D (CVF663)	Mycobacterium tuberculosis H37Rv
scaffold_63252_1	121	VFG043448	741	7.7e-42	68.9	VFG043448 (Rv1837c) malate synthase G Fibronectin-binding protein (AI169)	Mycobacterium tuberculosis H37Rv
scaffold_63831_1	90	VFG001391	1232	8.6e-38	79.8	VFG001391 (narG) PROBABLE RESPIRATORY NITRATE REDUCTASE (ALPHA CHAIN) NARG Nitrate reductase (VF0302)	Mycobacterium tuberculosis H37Rv
scaffold_67512_1	115	VFG001406	230	2.4e-32	71.1	VFG001406 (ideR) Iron-dependent repressor and activator IdeR IdeR (VF0300)	Mycobacterium tuberculosis H37Rv
scaffold_67654_2	66	VFG009640	652	4.0e-16	64.8	VFG009640 (narX) PROBABLE NITRATE REDUCTASE NARX Fused nitrate reductase (CVF319)	Mycobacterium tuberculosis H37Rv
scaffold_68210_1	112	VFG001405	528	3.9e-32	60.4	VFG001405 (sigA/rpoV) RNA polymerase sigma factor SigA (VF0257)	Mycobacterium tuberculosis H37Rv
scaffold_69800_1	112	VFG043448	741	1.5e-31	60.9	VFG043448 (Rv1837c) malate synthase G Fibronectin-binding protein (AI169)	Mycobacterium tuberculosis H37Rv
scaffold_72163_1	109	VFG043550	540	3.7e-51	91.7	VFG043550 (Rv0440) chaperonin GroEL GroEL(Hsp60)/Cpn60.2 (AI353)	Mycobacterium tuberculosis H37Rv
scaffold_72339_1	108	VFG043448	741	7.6e-33	63.2	VFG043448 (Rv1837c) malate synthase G Fibronectin-binding protein (AI169)	Mycobacterium tuberculosis H37Rv
scaffold_72367_1	57	VFG001405	528	2.9e-15	69.1	VFG001405 (sigA/rpoV) RNA polymerase sigma factor SigA (VF0257)	Mycobacterium tuberculosis H37Rv
scaffold_73155_1	107	VFG031242	944	1.0e-29	64.9	VFG031242 (mmpL3) Possible conserved transmembrane transport protein MmpL3 HasA-type hemophore-mediated heme uptake system (IA045)	Mycobacterium tuberculosis H37Rv
scaffold_78168_1	101	VFG043448	741	5.6e-38	68.3	VFG043448 (Rv1837c) malate synthase G Fibronectin-binding protein (AI169)	Mycobacterium tuberculosis H37Rv
scaffold_79094_1	100	VFG043550	540	1.9e-33	70.7	VFG043550 (Rv0440) chaperonin GroEL GroEL(Hsp60)/Cpn60.2 (AI353)	Mycobacterium tuberculosis H37Rv
scaffold_79434_1	99	VFG043448	741	1.3e-26	62.4	VFG043448 (Rv1837c) malate synthase G Fibronectin-binding protein (AI169)	Mycobacterium tuberculosis H37Rv
scaffold_79621_1	98	VFG030880	433	1.0e-28	60.6	VFG030880 (cyp125) Probable cytochrome P450 125 Cyp125 Cyp125 (CVF652)	Mycobacterium tuberculosis H37Rv
scaffold_81504_1	96	VFG031390	770	2.4e-22	60.0	VFG031390 (ctpV) Probable metal cation transporter P-type ATPase CtpV Copper exporter (CVF658)	Mycobacterium tuberculosis H37Rv
scaffold_81532_1	96	VFG043448	741	5.5e-35	67.7	VFG043448 (Rv1837c) malate synthase G Fibronectin-binding protein (AI169)	Mycobacterium tuberculosis H37Rv
scaffold_80770_1	97	VFG017487	805	4.2e-22	63.9	VFG017487 (nuoG) NADH dehydrogenase I (chain G) NuoG (NADH- ubiquinone oxidoreductase chain G) NuoG (CVF620)	Mycobacterium ulcerans Agy99
scaffold_80875_1	97	VFG031047	664	9.6e-27	60.4	VFG031047 (zmp1) zinc metalloprotease Zn++ metallophrotease (CVF655)	Mycobacterium ulcerans Agy99
scaffold_81110_1	44	VFG009862	232	2.1e-13	77.3	VFG009862 (mprA) mycobacterial persistence regulator MprA MprA/B (CVF333)	Mycobacterium ulcerans Agy99
scaffold_36919_1	171	VFG009652	390	3.3e-54	62.4	VFG009652 (narK2) major facilitator superfamily MFS_1 Nitrate/nitrite transporter (CVF320)	Mycobacterium vanbaalenii PYR-1
scaffold_58833_1	98	VFG009318	135	2.2e-39	83.5	VFG009318 (panD) aspartate 1-decarboxylase Pantothenate synthesis (CVF305)	Mycobacterium vanbaalenii PYR-1
scaffold_73311_1	107	VFG009597	1233	3.7e-32	60.4	VFG009597 (narG) nitrate reductase, alpha subunit Nitrate reductase (CVF318)	Mycobacterium vanbaalenii PYR-1
scaffold_75530_1	92	VFG009636	243	5.7e-29	71.4	VFG009636 (narI) respiratory nitrate reductase, gamma subunit Nitrate reductase (CVF318)	Mycobacterium vanbaalenii PYR-1
scaffold_60783_1	124	VFG031508	136	1.9e-48	76.6	VFG031508 (ndk) nucleoside diphosphate kinase Nucleoside diphosphate kinase (CVF660)	Mycobacterium yongonense 05-1390
scaffold_64098_1	41	VFG016486	402	2.8e-12	80.0	VFG016486 (tuf) elongation factor Tu EF-Tu (CVF587)	Mycoplasma hyopneumoniae 232
scaffold_11584_1	202	VFG016490	395	4.1e-88	76.0	VFG016490 (tuf) translation elongation factor Tu EF-Tu (CVF587)	Mycoplasma mycoides subsp. mycoides SC str. PG1
scaffold_45273_1	74	VFG016490	395	4.4e-24	74.0	VFG016490 (tuf) translation elongation factor Tu EF-Tu (CVF587)	Mycoplasma mycoides subsp. mycoides SC str. PG1
scaffold_54341_1	134	VFG016490	395	1.4e-55	75.9	VFG016490 (tuf) translation elongation factor Tu EF-Tu (CVF587)	Mycoplasma mycoides subsp. mycoides SC str. PG1
scaffold_39663_1	123	VFG016491	394	3.4e-53	79.7	VFG016491 (tuf) elongation factor Tu EF-Tu (CVF587)	Mycoplasma penetrans HF-2
scaffold_72811_1	108	VFG016483	394	6.2e-43	71.3	VFG016483 (tuf) elongation factor Tu Fibronectin-binding protein (AI171)	Mycoplasma pneumoniae M129
scaffold_82014_1	57	VFG016483	394	2.1e-21	75.4	VFG016483 (tuf) elongation factor Tu Fibronectin-binding protein (AI171)	Mycoplasma pneumoniae M129
scaffold_32979_2	128	VFG016492	396	2.4e-57	83.6	VFG016492 (tuf) elongation factor Tu EF-Tu (CVF587)	Mycoplasma pulmonis UAB CTIP
scaffold_41792_1	120	VFG016492	396	1.8e-54	84.2	VFG016492 (tuf) elongation factor Tu EF-Tu (CVF587)	Mycoplasma pulmonis UAB CTIP
scaffold_77008_1	103	VFG016492	396	1.8e-36	70.9	VFG016492 (tuf) elongation factor Tu EF-Tu (CVF587)	Mycoplasma pulmonis UAB CTIP
scaffold_77053_1	103	VFG016492	396	2.4e-36	69.9	VFG016492 (tuf) elongation factor Tu EF-Tu (CVF587)	Mycoplasma pulmonis UAB CTIP
scaffold_270_5	493	VFG037029	504	4.6e-210	72.3	VFG037029 (katA) catalase Catalase (CVF760)	Neisseria gonorrhoeae FA 1090
scaffold_12733_1	335	VFG037029	504	1.3e-155	74.9	VFG037029 (katA) catalase Catalase (CVF760)	Neisseria gonorrhoeae FA 1090
scaffold_28800_1	202	VFG037029	504	1.3e-97	78.7	VFG037029 (katA) catalase Catalase (CVF760)	Neisseria gonorrhoeae FA 1090
scaffold_45714_1	149	VFG037029	504	3.3e-71	79.2	VFG037029 (katA) catalase Catalase (CVF760)	Neisseria gonorrhoeae FA 1090
scaffold_51527_1	138	VFG037029	504	2.3e-58	73.9	VFG037029 (katA) catalase Catalase (CVF760)	Neisseria gonorrhoeae FA 1090
scaffold_54572_1	134	VFG037101	522	2.4e-36	65.5	VFG037101 (msrA/B(pilB)) trifunctional thioredoxin/methionine sulfoxide reductase A/B protein Methionine sulphoxide reductase (CVF762)	Neisseria gonorrhoeae FA 1090
scaffold_77383_1	102	VFG037029	504	4.1e-52	87.3	VFG037029 (katA) catalase Catalase (CVF760)	Neisseria gonorrhoeae FA 1090
scaffold_1699_1	264	VFG037104	532	3.8e-94	64.0	VFG037104 (msrA/B(pilB)) trifunctional thioredoxin/methionine sulfoxide reductase A/B protein Methionine sulphoxide reductase (CVF762)	Neisseria gonorrhoeae NCCP11945
scaffold_8513_2	200	VFG037104	532	6.9e-72	65.7	VFG037104 (msrA/B(pilB)) trifunctional thioredoxin/methionine sulfoxide reductase A/B protein Methionine sulphoxide reductase (CVF762)	Neisseria gonorrhoeae NCCP11945
scaffold_43191_1	78	VFG037032	504	3.7e-21	61.6	VFG037032 (katA) protein KatA Catalase (CVF760)	Neisseria gonorrhoeae NCCP11945
scaffold_49496_1	104	VFG037104	532	2.0e-38	68.7	VFG037104 (msrA/B(pilB)) trifunctional thioredoxin/methionine sulfoxide reductase A/B protein Methionine sulphoxide reductase (CVF762)	Neisseria gonorrhoeae NCCP11945
scaffold_77670_1	102	VFG037104	532	4.8e-37	69.1	VFG037104 (msrA/B(pilB)) trifunctional thioredoxin/methionine sulfoxide reductase A/B protein Methionine sulphoxide reductase (CVF762)	Neisseria gonorrhoeae NCCP11945
scaffold_132_6	150	VFG037116	522	1.7e-46	60.0	VFG037116 (msrA/B(pilB)) peptide methionine sulfoxide reductase Methionine sulphoxide reductase (CVF762)	Neisseria lactamica 020-06
scaffold_24750_1	159	VFG037044	504	2.0e-66	73.4	VFG037044 (katA) catalase Catalase (CVF760)	Neisseria lactamica 020-06
scaffold_60657_1	124	VFG036954	390	3.3e-40	61.0	VFG036954 (farA) multidrug resistance translocase FarAB (CVF758)	Neisseria lactamica 020-06
scaffold_60183_1	125	VFG036959	508	6.1e-42	65.6	VFG036959 (farB) fatty acid efflux system protein FarAB (CVF758)	Neisseria meningitidis 053442
scaffold_13690_2	177	VFG037041	504	4.4e-78	81.9	VFG037041 (katA) catalase Catalase (CVF760)	Neisseria meningitidis M01-240355
scaffold_72872_1	108	VFG037041	504	1.1e-60	95.4	VFG037041 (katA) catalase Catalase (CVF760)	Neisseria meningitidis M01-240355
scaffold_10530_2	57	VFG037039	504	1.1e-17	74.1	VFG037039 (katA) catalase Catalase (CVF760)	Neisseria meningitidis M04-240196
scaffold_4025_1	159	VFG037028	504	3.3e-69	82.4	VFG037028 (katA) catalase KatA (VF0454)	Neisseria meningitidis MC58
scaffold_9027_1	115	VFG037028	504	1.3e-43	78.1	VFG037028 (katA) catalase KatA (VF0454)	Neisseria meningitidis MC58
scaffold_16821_1	142	VFG037100	522	3.5e-46	65.4	VFG037100 (msrA/B(pilB)) trifunctional thioredoxin/methionine sulfoxide reductase A/B protein MsrAB (VF0456)	Neisseria meningitidis MC58
scaffold_34632_2	114	VFG037028	504	5.2e-48	83.5	VFG037028 (katA) catalase KatA (VF0454)	Neisseria meningitidis MC58
scaffold_60554_1	124	VFG037028	504	3.1e-46	70.3	VFG037028 (katA) catalase KatA (VF0454)	Neisseria meningitidis MC58
scaffold_33433_1	182	VFG040914	498	5.0e-61	63.2	VFG040914 (outE) general secretion pathway protein E out (SS212)	Pectobacterium atrosepticum SCRI1043
scaffold_36364_1	173	VFG042318	1480	8.4e-58	65.3	VFG042318 (plu0316) hemolysin PhlA PhlA-PhlB (SS139)	Photorhabdus luminescens subsp. laumondii TTO1
scaffold_11185_2	310	VFG019781	422	2.8e-144	79.0	VFG019781 (PLES_19091) UDP-glucose/GDP-mannose dehydrogenase-like protein LPS O-antigen (P. aeruginosa) (CVF520)	Pseudomonas aeruginosa LESB58
scaffold_24216_1	49	VFG019782	340	2.9e-16	79.6	VFG019782 (PLES_19101) wbpP LPS O-antigen (P. aeruginosa) (CVF520)	Pseudomonas aeruginosa LESB58
scaffold_24216_2	165	VFG019781	422	7.0e-70	74.4	VFG019781 (PLES_19091) UDP-glucose/GDP-mannose dehydrogenase-like protein LPS O-antigen (P. aeruginosa) (CVF520)	Pseudomonas aeruginosa LESB58
scaffold_26824_1	172	VFG019781	422	1.4e-57	67.1	VFG019781 (PLES_19091) UDP-glucose/GDP-mannose dehydrogenase-like protein LPS O-antigen (P. aeruginosa) (CVF520)	Pseudomonas aeruginosa LESB58
scaffold_66600_1	99	VFG020090	1438	2.2e-50	100.0	VFG020090 (pchE) dihydroaeruginoic acid synthetase Pyochelin (CVF553)	Pseudomonas aeruginosa LESB58
scaffold_64199_1	120	VFG019785	627	1.0e-38	61.7	VFG019785 (PLES_19131) ORF_10; similar to Asparagine synthase LPS O-antigen (P. aeruginosa) (CVF520)	Pseudomonas aeruginosa LESB58
scaffold_32601_1	185	VFG014120	384	1.6e-62	66.3	VFG014120 (PSPA7_1971) UDP-N-acetylglucosamine 2-epimerase LPS O-antigen (P. aeruginosa) (CVF520)	Pseudomonas aeruginosa PA7
scaffold_49685_2	70	VFG014128	260	2.9e-17	61.9	VFG014128 (PSPA7_1979) imidazole glycerol phosphate synthase subunit HisF LPS O-antigen (P. aeruginosa) (CVF520)	Pseudomonas aeruginosa PA7
scaffold_4_154	192	VFG014102	191	6.5e-43	60.9	VFG014102 (wbpD) probable acetyltransferase WbpD LPS O-antigen (P. aeruginosa) (CVF520)	Pseudomonas aeruginosa PAO1
scaffold_338_4	215	VFG015080	214	1.3e-68	60.8	VFG015080 (gacA) response regulator GacA GacS/GacA two-component system (CVF529)	Pseudomonas aeruginosa PAO1
scaffold_685_7	211	VFG042734	214	1.6e-74	66.8	VFG042734 (vfr) cAMP-regulatory protein type IV pili (AI097)	Pseudomonas aeruginosa PAO1
scaffold_1976_2	213	VFG042734	214	5.5e-75	67.3	VFG042734 (vfr) cAMP-regulatory protein type IV pili (AI097)	Pseudomonas aeruginosa PAO1
scaffold_8596_3	57	VFG001231	2472	1.4e-14	80.0	VFG001231 (chpA) still frameshift probable component of chemotactic signal transduction system Type IV pili (VF0082)	Pseudomonas aeruginosa PAO1
scaffold_9989_2	273	VFG042736	497	1.1e-96	64.3	VFG042736 (rpoN) RNA polymerase factor sigma-54 type IV pili (AI097)	Pseudomonas aeruginosa PAO1
scaffold_10928_2	192	VFG000121	193	3.8e-67	65.4	VFG000121 (algU) alginate biosynthesis protein AlgZ/FimS Alginate (VF0091)	Pseudomonas aeruginosa PAO1
scaffold_15272_1	72	VFG042736	497	5.6e-16	61.4	VFG042736 (rpoN) RNA polymerase factor sigma-54 type IV pili (AI097)	Pseudomonas aeruginosa PAO1
scaffold_15371_1	55	VFG001257	157	2.5e-16	67.9	VFG001257 (fliN) flagellar motor switch protein FliN Flagella (VF0273)	Pseudomonas aeruginosa PAO1
scaffold_20222_1	57	VFG043016	159	6.2e-18	66.1	VFG043016 (chew) purine-binding chemotaxis protein Deoxyhexose linking sugar, 209 Da capping structure (AI138)	Pseudomonas aeruginosa PAO1
scaffold_23359_1	85	VFG001225	135	1.4e-34	81.2	VFG001225 (pilG) twitching motility protein PilG Type IV pili (VF0082)	Pseudomonas aeruginosa PAO1
scaffold_26209_2	161	VFG001224	382	8.4e-52	62.1	VFG001224 (pilU) twitching motility protein PilU Type IV pili (VF0082)	Pseudomonas aeruginosa PAO1
scaffold_28660_1	52	VFG001225	135	5.1e-19	82.7	VFG001225 (pilG) twitching motility protein PilG Type IV pili (VF0082)	Pseudomonas aeruginosa PAO1
scaffold_35153_2	117	VFG042734	214	1.0e-43	75.0	VFG042734 (vfr) cAMP-regulatory protein type IV pili (AI097)	Pseudomonas aeruginosa PAO1
scaffold_35542_1	175	VFG000182	502	2.0e-67	75.6	VFG000182 (xcpR) general secretion pathway protein E xcp secretion system (VF0084)	Pseudomonas aeruginosa PAO1
scaffold_35733_1	105	VFG042734	214	8.5e-37	71.8	VFG042734 (vfr) cAMP-regulatory protein type IV pili (AI097)	Pseudomonas aeruginosa PAO1
scaffold_36103_1	145	VFG001223	344	5.4e-58	77.0	VFG001223 (pilT) twitching motility protein PilT Type IV pili (VF0082)	Pseudomonas aeruginosa PAO1
scaffold_36388_1	172	VFG043014	753	4.3e-46	65.9	VFG043014 (cheA) two-component sensor Deoxyhexose linking sugar, 209 Da capping structure (AI138)	Pseudomonas aeruginosa PAO1
scaffold_41083_2	113	VFG000143	345	2.8e-30	62.9	VFG000143 (waaF) heptosyltransferase I LPS (VF0085)	Pseudomonas aeruginosa PAO1
scaffold_43093_1	155	VFG041031	361	3.6e-44	60.3	VFG041031 (sfa3) transcriptional regulator HSI-3 (SS180)	Pseudomonas aeruginosa PAO1
scaffold_46004_1	148	VFG000113	374	2.1e-57	73.0	VFG000113 (pilC) still frameshift type 4 fimbrial biogenesis protein PilC Type IV pili (VF0082)	Pseudomonas aeruginosa PAO1
scaffold_47897_1	145	VFG001223	344	9.2e-66	85.5	VFG001223 (pilT) twitching motility protein PilT Type IV pili (VF0082)	Pseudomonas aeruginosa PAO1
scaffold_48409_1	95	VFG042734	214	5.0e-36	75.5	VFG042734 (vfr) cAMP-regulatory protein type IV pili (AI097)	Pseudomonas aeruginosa PAO1
scaffold_58374_1	127	VFG000141	425	2.3e-36	62.9	VFG000141 (waaA) lipopolysaccharide core biosynthesis protein WaaP LPS (VF0085)	Pseudomonas aeruginosa PAO1
scaffold_58765_1	108	VFG042734	214	1.6e-46	83.2	VFG042734 (vfr) cAMP-regulatory protein type IV pili (AI097)	Pseudomonas aeruginosa PAO1
scaffold_59043_1	126	VFG001263	707	9.5e-51	79.2	VFG001263 (flhA) flagellar biosynthesis protein FlhA Flagella (VF0273)	Pseudomonas aeruginosa PAO1
scaffold_60022_1	126	VFG002077	643	2.7e-29	60.0	VFG002077 (vgrG1a) type VI secretion system substrate VgrG1 HSI-I (VF0334)	Pseudomonas aeruginosa PAO1
scaffold_65898_1	114	VFG000168	547	1.4e-61	100.0	VFG000168 (pchD) pyochelin biosynthesis protein PchD Pyochelin (VF0095)	Pseudomonas aeruginosa PAO1
scaffold_67134_1	115	VFG001218	714	6.0e-28	63.2	VFG001218 (pilQ) type 4 fimbrial biogenesis protein PilQ Type IV pili (VF0082)	Pseudomonas aeruginosa PAO1
scaffold_68359_1	114	VFG014100	316	1.4e-45	77.2	VFG014100 (wbpB) probable oxidoreductase WpbB LPS O-antigen (P. aeruginosa) (CVF520)	Pseudomonas aeruginosa PAO1
scaffold_73593_1	107	VFG001266	574	2.1e-51	97.2	VFG001266 (pchI) ABC transporter ATP-binding protein Pyochelin (VF0095)	Pseudomonas aeruginosa PAO1
scaffold_75088_1	105	VFG041031	361	4.5e-30	61.9	VFG041031 (sfa3) transcriptional regulator HSI-3 (SS180)	Pseudomonas aeruginosa PAO1
scaffold_76135_1	103	VFG042735	562	4.3e-25	61.6	VFG042735 (fimL) hypothetical protein type IV pili (AI097)	Pseudomonas aeruginosa PAO1
scaffold_77624_1	41	VFG002077	643	6.5e-17	100.0	VFG002077 (vgrG1a) type VI secretion system substrate VgrG1 HSI-I (VF0334)	Pseudomonas aeruginosa PAO1
scaffold_79256_1	99	VFG001224	382	2.2e-26	60.2	VFG001224 (pilU) twitching motility protein PilU Type IV pili (VF0082)	Pseudomonas aeruginosa PAO1
scaffold_1710_1	293	VFG014138	422	1.5e-112	67.9	VFG014138 (orfH) UDP-N-acetyl-D-mannosaminuronate dehydrogenase LPS O-antigen (P. aeruginosa) (CVF520)	Pseudomonas aeruginosa UCBPP-PA14
scaffold_46678_1	108	VFG014137	378	1.2e-33	63.0	VFG014137 (orfK) putative UDP-N-acetylglucosamine 2-epimerase LPS O-antigen (P. aeruginosa) (CVF520)	Pseudomonas aeruginosa UCBPP-PA14
scaffold_24752_1	132	VFG015008	450	3.1e-36	62.0	VFG015008 (mucP) membrane-associated Zn-dependent proteases 1 Alginate regulation (CVF523)	Pseudomonas entomophila L48
scaffold_30040_1	195	VFG014050	691	2.7e-60	74.9	VFG014050 (pilJ) type IV pili methyl-accepting chemotaxis transducer PilJ Type IV pili twitching motility related proteins (CVF519)	Pseudomonas entomophila L48
scaffold_43436_1	154	VFG015075	918	2.4e-48	67.1	VFG015075 (gacS) GacS sensor kinase protein GacS/GacA two-component system (CVF529)	Pseudomonas entomophila L48
scaffold_66160_1	117	VFG014958	479	5.3e-40	67.2	VFG014958 (mucD) serine protease MucD Alginate regulation (CVF523)	Pseudomonas entomophila L48
scaffold_76001_1	50	VFG015088	212	3.7e-14	72.0	VFG015088 (gacA) response regulator GacA (Global antibiotic and cyanide control protein, LuxR/UhpA family) GacS/GacA two-component system (CVF529)	Pseudomonas entomophila L48
scaffold_97_16	90	VFG014561	89	6.8e-19	61.7	VFG014561 (fliQ) flagellar biosynthesis protein Flagella (CVF521)	Pseudomonas fluorescens Pf0-1
scaffold_26134_1	209	VFG014052	686	1.2e-55	68.5	VFG014052 (pilJ) chemotaxis sensory transducer Type IV pili twitching motility related proteins (CVF519)	Pseudomonas fluorescens Pf0-1
scaffold_76393_1	103	VFG014691	355	3.0e-26	60.5	VFG014691 (motB) flagellar motor protein Flagella (CVF521)	Pseudomonas fluorescens Pf0-1
scaffold_235_14	193	VFG014915	193	5.7e-71	69.6	VFG014915 (algU) RNA polymerase sigma-70 factor Alginate regulation (CVF523)	Pseudomonas fluorescens Pf-5
scaffold_5872_1	172	VFG014915	193	1.0e-63	68.2	VFG014915 (algU) RNA polymerase sigma-70 factor Alginate regulation (CVF523)	Pseudomonas fluorescens Pf-5
scaffold_12672_2	117	VFG014915	193	1.3e-33	74.2	VFG014915 (algU) RNA polymerase sigma-70 factor Alginate regulation (CVF523)	Pseudomonas fluorescens Pf-5
scaffold_48960_1	143	VFG014915	193	6.7e-45	65.4	VFG014915 (algU) RNA polymerase sigma-70 factor Alginate regulation (CVF523)	Pseudomonas fluorescens Pf-5
scaffold_71145_1	108	VFG043482	325	1.2e-30	60.6	VFG043482 (oprF) outer membrane protein OprF Fibronectin-binding protein (AI231)	Pseudomonas fluorescens Pf-5
scaffold_81049_1	96	VFG019760	465	1.2e-26	65.1	VFG019760 (pilR) putative two-component system, response regulator Type IV pili biosynthesis (CVF518)	Pseudomonas fluorescens SBW25
scaffold_1098_6	207	VFG015091	214	2.5e-69	61.2	VFG015091 (gacA) two component transcriptional regulator, LuxR family GacS/GacA two-component system (CVF529)	Pseudomonas mendocina ymp
scaffold_25146_1	60	VFG014917	193	2.2e-21	82.5	VFG014917 (algU) RNA polymerase, sigma-24 subunit, ECF subfamily Alginate regulation (CVF523)	Pseudomonas mendocina ymp
scaffold_28448_1	203	VFG014071	2423	6.4e-65	62.9	VFG014071 (chpA) CheA signal transduction histidine kinase Type IV pili twitching motility related proteins (CVF519)	Pseudomonas mendocina ymp
scaffold_32329_1	187	VFG014053	678	8.8e-53	67.7	VFG014053 (pilJ) methyl-accepting chemotaxis sensory transducer Type IV pili twitching motility related proteins (CVF519)	Pseudomonas mendocina ymp
scaffold_44028_1	153	VFG014053	678	2.2e-38	63.6	VFG014053 (pilJ) methyl-accepting chemotaxis sensory transducer Type IV pili twitching motility related proteins (CVF519)	Pseudomonas mendocina ymp
scaffold_55759_1	131	VFG014053	678	3.8e-26	70.1	VFG014053 (pilJ) methyl-accepting chemotaxis sensory transducer Type IV pili twitching motility related proteins (CVF519)	Pseudomonas mendocina ymp
scaffold_57399_1	70	VFG014250	386	3.9e-22	73.9	VFG014250 (flgI) flagellar P-ring protein Flagella (CVF521)	Pseudomonas mendocina ymp
scaffold_58348_2	98	VFG013907	344	1.3e-18	62.0	VFG013907 (pilT) twitching motility protein Type IV pili biosynthesis (CVF518)	Pseudomonas mendocina ymp
scaffold_69100_1	113	VFG014601	715	5.0e-35	61.0	VFG014601 (flhA) flagellar biosynthesis protein FlhA Flagella (CVF521)	Pseudomonas mendocina ymp
scaffold_77036_1	102	VFG014854	483	7.7e-27	63.3	VFG014854 (algI) membrane bound O-acyl transferase, MBOAT family protein Alginate biosynthesis (CVF522)	Pseudomonas mendocina ymp
scaffold_78824_1	99	VFG014071	2423	7.0e-41	78.8	VFG014071 (chpA) CheA signal transduction histidine kinase Type IV pili twitching motility related proteins (CVF519)	Pseudomonas mendocina ymp
scaffold_3511_4	58	VFG015710	380	1.0e-15	63.0	VFG015710 (flhB) flagellar biosynthetic protein FlhB Flagella (CVF521)	Pseudomonas putida GB-1
scaffold_26349_1	214	VFG015680	451	2.8e-39	61.9	VFG015680 (fleR) two component, sigma54 specific, transcriptional regulator, Fis family Flagella (CVF521)	Pseudomonas putida GB-1
scaffold_40668_1	161	VFG014990	402	2.1e-50	66.2	VFG014990 (algW) HtrA-like protease AlgW Alginate regulation (CVF523)	Pseudomonas putida KT2440
scaffold_52650_1	90	VFG015086	212	1.1e-24	60.0	VFG015086 (gacA) DNA-binding response regulator GacA GacS/GacA two-component system (CVF529)	Pseudomonas putida KT2440
scaffold_33925_2	129	VFG015775	450	3.0e-36	61.9	VFG015775 (mucP) membrane-associated zinc metalloprotease Alginate regulation (CVF523)	Pseudomonas putida W619
scaffold_78166_1	101	VFG015715	435	1.0e-31	70.1	VFG015715 (flhF) GTP-binding signal recognition particle SRP54 G- domain Flagella (CVF521)	Pseudomonas putida W619
scaffold_11801_1	368	VFG013794	405	2.7e-122	61.6	VFG013794 (pilC) type 4 pilus biogenesis protein PilC Type IV pili biosynthesis (CVF518)	Pseudomonas stutzeri A1501
scaffold_13007_3	66	VFG014015	125	1.0e-24	79.7	VFG014015 (pilG) twitching motility protein PilG Type IV pili twitching motility related proteins (CVF519)	Pseudomonas stutzeri A1501
scaffold_17577_1	287	VFG013781	567	7.5e-120	74.2	VFG013781 (pilB) type 4 fimbrial biogenesis protein PilB Type IV pili biosynthesis (CVF518)	Pseudomonas stutzeri A1501
scaffold_20098_1	259	VFG013781	567	1.6e-108	75.5	VFG013781 (pilB) type 4 fimbrial biogenesis protein PilB Type IV pili biosynthesis (CVF518)	Pseudomonas stutzeri A1501
scaffold_23355_1	215	VFG013781	567	6.1e-82	71.5	VFG013781 (pilB) type 4 fimbrial biogenesis protein PilB Type IV pili biosynthesis (CVF518)	Pseudomonas stutzeri A1501
scaffold_23635_1	232	VFG013781	567	7.9e-112	84.5	VFG013781 (pilB) type 4 fimbrial biogenesis protein PilB Type IV pili biosynthesis (CVF518)	Pseudomonas stutzeri A1501
scaffold_41175_1	105	VFG013908	344	1.4e-36	74.8	VFG013908 (pilT) twitching motility protein PilT Type IV pili biosynthesis (CVF518)	Pseudomonas stutzeri A1501
scaffold_46233_1	148	VFG013917	354	7.7e-60	73.0	VFG013917 (pilU) twitching motility protein PilU Type IV pili biosynthesis (CVF518)	Pseudomonas stutzeri A1501
scaffold_47149_1	146	VFG015092	209	1.5e-44	60.1	VFG015092 (gacA) DNA-binding response regulator GacA GacS/GacA two-component system (CVF529)	Pseudomonas stutzeri A1501
scaffold_57399_2	56	VFG014264	386	5.6e-11	60.0	VFG014264 (flgJ) flagellar protein FlgJ Flagella (CVF521)	Pseudomonas stutzeri A1501
scaffold_60275_2	83	VFG014028	121	9.7e-36	88.8	VFG014028 (pilH) type IV pilus response regulator PilH Type IV pili twitching motility related proteins (CVF519)	Pseudomonas stutzeri A1501
scaffold_74548_1	96	VFG013908	344	1.7e-39	85.1	VFG013908 (pilT) twitching motility protein PilT Type IV pili biosynthesis (CVF518)	Pseudomonas stutzeri A1501
scaffold_77226_1	102	VFG015092	209	2.1e-32	65.4	VFG015092 (gacA) DNA-binding response regulator GacA GacS/GacA two-component system (CVF529)	Pseudomonas stutzeri A1501
scaffold_78059_1	101	VFG013794	405	1.2e-35	76.2	VFG013794 (pilC) type 4 pilus biogenesis protein PilC Type IV pili biosynthesis (CVF518)	Pseudomonas stutzeri A1501
scaffold_76148_1	50	VFG014909	193	1.1e-15	76.6	VFG014909 (algU) RNA polymerase sigma-70 factor Alginate regulation (CVF523)	Pseudomonas syringae pv. tomato str. DC3000
scaffold_79025_1	100	VFG014385	471	1.5e-19	63.4	VFG014385 (fleR) sigma-54 dependent transcriptional regulator/response regulator FleR Flagella (CVF521)	Pseudomonas syringae pv. tomato str. DC3000
scaffold_64415_1	119	VFG018397	487	7.8e-55	85.6	VFG018397 (phoQ) hypothetical protein PhoPQ (CVF010)	Salmonella enterica subsp. arizonae serovar 62:z4,z23:-- str. RSK2980
scaffold_5335_1	714	VFG041176	1385	3.3e-209	65.6	VFG041176 (SG1048) RHS family protein T6SS (SS177)	Salmonella enterica subsp. enterica serovar Gallinarum str. 287/91
scaffold_75804_1	75	VFG021069	101	2.5e-27	70.7	VFG021069 (sodCI) Gifsy-2 prophage superoxide dismutase precursor (Cu-Zn) SodCI (CVF017)	Salmonella enterica subsp. enterica serovar Paratyphi C strain RKS4594
scaffold_6031_2	226	VFG004061	224	1.8e-84	67.3	VFG004061 (phoP) transcriptional regulatory protein PhoP, regulator of virulence determinants PhoPQ (CVF010)	Salmonella enterica subsp. enterica serovar Typhi str. CT18
scaffold_49056_1	142	VFG004229	863	1.4e-50	63.4	VFG004229 (staC) outer membrane usher protein HtrE precursor Sta (AI063)	Salmonella enterica subsp. enterica serovar Typhi str. CT18
scaffold_79_45	150	VFG000478	150	6.8e-72	87.0	VFG000478 (fur) transcriptional repressor of iron-responsive genes (Fur family) (ferric uptake regulator) Fur (VF0113)	Salmonella enterica subsp. enterica serovar Typhimurium str. LT2
scaffold_246_4	278	VFG000462	277	6.2e-103	68.1	VFG000462 (csgG) curli production assembly/transport protein CsgG Agf (VF0103)	Salmonella enterica subsp. enterica serovar Typhimurium str. LT2
scaffold_676_11	328	VFG000477	330	9.1e-138	88.5	VFG000477 (rpoS) sigma S (sigma 38) factor of RNA polymerase, major sigmafactor during stationary phase RpoS (VF0112)	Salmonella enterica subsp. enterica serovar Typhimurium str. LT2
scaffold_1941_4	331	VFG000477	330	4.9e-123	76.6	VFG000477 (rpoS) sigma S (sigma 38) factor of RNA polymerase, major sigmafactor during stationary phase RpoS (VF0112)	Salmonella enterica subsp. enterica serovar Typhimurium str. LT2
scaffold_2517_2	146	VFG000478	150	4.9e-59	74.3	VFG000478 (fur) transcriptional repressor of iron-responsive genes (Fur family) (ferric uptake regulator) Fur (VF0113)	Salmonella enterica subsp. enterica serovar Typhimurium str. LT2
scaffold_6830_2	323	VFG000477	330	1.9e-124	77.5	VFG000477 (rpoS) sigma S (sigma 38) factor of RNA polymerase, major sigmafactor during stationary phase RpoS (VF0112)	Salmonella enterica subsp. enterica serovar Typhimurium str. LT2
scaffold_21009_2	46	VFG000463	177	1.9e-12	64.4	VFG000463 (sodCI) Gifsy-2 prophage: superoxide dismutase precursor (Cu-Zn) SodCI (VF0109)	Salmonella enterica subsp. enterica serovar Typhimurium str. LT2
scaffold_22162_1	146	VFG000478	150	3.8e-59	74.6	VFG000478 (fur) transcriptional repressor of iron-responsive genes (Fur family) (ferric uptake regulator) Fur (VF0113)	Salmonella enterica subsp. enterica serovar Typhimurium str. LT2
scaffold_24729_1	51	VFG000478	150	1.4e-16	78.4	VFG000478 (fur) transcriptional repressor of iron-responsive genes (Fur family) (ferric uptake regulator) Fur (VF0113)	Salmonella enterica subsp. enterica serovar Typhimurium str. LT2
scaffold_27662_1	188	VFG000477	330	7.2e-71	72.7	VFG000477 (rpoS) sigma S (sigma 38) factor of RNA polymerase, major sigmafactor during stationary phase RpoS (VF0112)	Salmonella enterica subsp. enterica serovar Typhimurium str. LT2
scaffold_40500_1	146	VFG000478	150	1.3e-80	99.3	VFG000478 (fur) transcriptional repressor of iron-responsive genes (Fur family) (ferric uptake regulator) Fur (VF0113)	Salmonella enterica subsp. enterica serovar Typhimurium str. LT2
scaffold_42861_1	76	VFG000478	150	6.6e-23	68.6	VFG000478 (fur) transcriptional repressor of iron-responsive genes (Fur family) (ferric uptake regulator) Fur (VF0113)	Salmonella enterica subsp. enterica serovar Typhimurium str. LT2
scaffold_45356_1	101	VFG000477	330	1.4e-49	100.0	VFG000477 (rpoS) sigma S (sigma 38) factor of RNA polymerase, major sigmafactor during stationary phase RpoS (VF0112)	Salmonella enterica subsp. enterica serovar Typhimurium str. LT2
scaffold_47245_1	75	VFG000478	150	6.5e-23	68.6	VFG000478 (fur) transcriptional repressor of iron-responsive genes (Fur family) (ferric uptake regulator) Fur (VF0113)	Salmonella enterica subsp. enterica serovar Typhimurium str. LT2
scaffold_49750_1	98	VFG043020	97	1.4e-33	81.3	VFG043020 (flgM) anti-sigma28 factor FlgM peritrichous flagella (AI139)	Salmonella enterica subsp. enterica serovar Typhimurium str. LT2
scaffold_54285_1	134	VFG000454	842	2.0e-43	62.7	VFG000454 (lpfC) long polar fimbrial usher protein LpfC Lpf (VF0105)	Salmonella enterica subsp. enterica serovar Typhimurium str. LT2
scaffold_56204_1	91	VFG000477	330	4.8e-28	74.7	VFG000477 (rpoS) sigma S (sigma 38) factor of RNA polymerase, major sigmafactor during stationary phase RpoS (VF0112)	Salmonella enterica subsp. enterica serovar Typhimurium str. LT2
scaffold_60879_1	124	VFG004265	829	9.3e-43	63.2	VFG004265 (stcC) putative outer membrane protein Stc (AI060)	Salmonella enterica subsp. enterica serovar Typhimurium str. LT2
scaffold_68174_1	114	VFG000477	330	2.2e-54	87.6	VFG000477 (rpoS) sigma S (sigma 38) factor of RNA polymerase, major sigmafactor during stationary phase RpoS (VF0112)	Salmonella enterica subsp. enterica serovar Typhimurium str. LT2
scaffold_68415_1	114	VFG000574	908	2.3e-40	67.0	VFG000574 (mgtB) Mg2+ transport protein MgtBC (VF0106)	Salmonella enterica subsp. enterica serovar Typhimurium str. LT2
scaffold_70298_1	112	VFG043040	553	3.1e-13	92.9	VFG043040 (tar/cheM) methyl accepting chemotaxis protein II peritrichous flagella (AI139)	Salmonella enterica subsp. enterica serovar Typhimurium str. LT2
scaffold_73210_1	108	VFG004265	829	6.4e-48	82.4	VFG004265 (stcC) putative outer membrane protein Stc (AI060)	Salmonella enterica subsp. enterica serovar Typhimurium str. LT2
scaffold_79508_1	99	VFG043040	553	1.5e-19	61.1	VFG043040 (tar/cheM) methyl accepting chemotaxis protein II peritrichous flagella (AI139)	Salmonella enterica subsp. enterica serovar Typhimurium str. LT2
scaffold_44364_1	106	VFG013037	330	5.5e-52	100.0	VFG013037 (fepG) ferric enterobactin transport protein Enterobactin transport (CVF478)	Shigella boydii Sb227
scaffold_49181_1	105	VFG012983	285	3.1e-55	100.0	VFG012983 (entB) 2,3-dihydro-2,3-dihydroxybenzoate synthetase, isochroismatase Enterobactin synthesis (CVF477)	Shigella boydii Sb227
scaffold_72583_1	108	VFG013013	739	9.9e-57	100.0	VFG013013 (fepA) FepA Enterobactin transport (CVF478)	Shigella boydii Sb227
scaffold_26972_1	193	VFG012837	514	2.6e-60	61.7	VFG012837 (ipaH2.5) invasion plasmid antigen, fragment Mxi-Spa TTSS effectors controlled by MxiE (CVF465)	Shigella dysenteriae Sd197
scaffold_56742_1	130	VFG013021	271	1.0e-71	100.0	VFG013021 (fepC) ATP-binding component of ferric enterobactin transport Enterobactin transport (CVF478)	Shigella dysenteriae Sd197
scaffold_58293_2	61	VFG013021	271	1.9e-28	100.0	VFG013021 (fepC) ATP-binding component of ferric enterobactin transport Enterobactin transport (CVF478)	Shigella dysenteriae Sd197
scaffold_75386_2	62	VFG013033	330	2.7e-27	100.0	VFG013033 (fepG) ferric enterobactin transport protein Enterobactin transport (CVF478)	Shigella dysenteriae Sd197
scaffold_39589_1	84	VFG012874	444	3.2e-26	74.0	VFG012874 (ipaH) hypothetical protein Mxi-Spa TTSS effectors controlled by MxiE (CVF465)	Shigella flexneri 2a str. 2457T
scaffold_59597_1	125	VFG012874	444	7.2e-67	97.6	VFG012874 (ipaH) hypothetical protein Mxi-Spa TTSS effectors controlled by MxiE (CVF465)	Shigella flexneri 2a str. 2457T
scaffold_49181_2	37	VFG012976	248	1.1e-15	100.0	VFG012976 (entA) 2,3-dihydro-2,3-dihydroxybenzoate dehydrogenase Enterobactin synthesis (CVF477)	Shigella flexneri 5 str. 8401
scaffold_1394_4	304	VFG013050	275	2.7e-107	71.1	VFG013050 (sitB) Iron transport protein ATP-binding component Ferrous iron transport (CVF479)	Shigella sonnei Ss046
scaffold_11497_1	393	VFG049917(gb|YP_309276.1)	1402	1.6e-152	74.3	VFG049917(gb|YP_309276.1) (rhs/PAAR) Type VI secretion system protein, PAAR family T6SS (VF0579)	Shigella sonnei Ss046
scaffold_33511_1	182	VFG049917(gb|YP_309276.1)	1402	5.3e-63	74.7	VFG049917(gb|YP_309276.1) (rhs/PAAR) Type VI secretion system protein, PAAR family T6SS (VF0579)	Shigella sonnei Ss046
scaffold_51386_1	139	VFG049917(gb|YP_309276.1)	1402	2.5e-76	97.1	VFG049917(gb|YP_309276.1) (rhs/PAAR) Type VI secretion system protein, PAAR family T6SS (VF0579)	Shigella sonnei Ss046
scaffold_53908_1	135	VFG013002	1293	1.2e-70	98.5	VFG013002 (entF) ATP-dependent serine activating enzyme Enterobactin synthesis (CVF477)	Shigella sonnei Ss046
scaffold_61007_1	124	VFG013050	275	1.7e-36	62.5	VFG013050 (sitB) Iron transport protein ATP-binding component Ferrous iron transport (CVF479)	Shigella sonnei Ss046
scaffold_80644_1	97	VFG049904(gb|YP_309261.1)	819	2.7e-45	96.9	VFG049904(gb|YP_309261.1) (clpV/tssH) Type VI secretion system ATPase ClpV/TssH T6SS (VF0579)	Shigella sonnei Ss046
scaffold_81035_1	96	VFG049917(gb|YP_309276.1)	1402	4.7e-34	70.7	VFG049917(gb|YP_309276.1) (rhs/PAAR) Type VI secretion system protein, PAAR family T6SS (VF0579)	Shigella sonnei Ss046
scaffold_41987_1	158	VFG002972	607	8.2e-60	75.7	VFG002972 (capD) capsular polysaccharide synthesis enzyme Capsule (CVF110)	Staphylococcus aureus subsp. aureus MRSA252
scaffold_43033_2	137	VFG005131	391	1.7e-37	63.6	VFG005131 (capP) capsular polysaccharide synthesis enzyme Capsule (CVF110)	Staphylococcus aureus subsp. aureus MRSA252
scaffold_35695_1	175	VFG018154	1479	3.4e-67	68.4	VFG018154 (essC) hypothetical protein Type VII secretion system (CVF624)	Staphylococcus aureus subsp. aureus Mu3
scaffold_13406_2	130	VFG005130	391	2.3e-44	65.4	VFG005130 (capP) capsular polysaccharide synthesis enzyme Cap5P Capsule (CVF110)	Staphylococcus aureus subsp. aureus Mu50
scaffold_61920_1	123	VFG005097	377	4.3e-40	63.4	VFG005097 (capL) hypothetical protein Capsule (CVF110)	Staphylococcus haemolyticus JCSC1435
scaffold_67419_1	98	VFG005042	374	2.9e-39	74.5	VFG005042 (capG) capsular polysaccharide synthesis enzyme CapG Capsule (CVF110)	Staphylococcus haemolyticus JCSC1435
scaffold_80353_1	98	VFG005097	377	4.2e-30	64.3	VFG005097 (capL) hypothetical protein Capsule (CVF110)	Staphylococcus haemolyticus JCSC1435
scaffold_3608_3	261	VFG002965	611	1.4e-72	64.2	VFG002965 (SSP0063) capsular polysaccharide biosynthesis protein Capsule (CVF110)	Staphylococcus saprophyticus subsp. saprophyticus ATCC 15305
scaffold_16358_1	303	VFG002965	611	1.1e-100	61.0	VFG002965 (SSP0063) capsular polysaccharide biosynthesis protein Capsule (CVF110)	Staphylococcus saprophyticus subsp. saprophyticus ATCC 15305
scaffold_56268_1	131	VFG002965	611	3.6e-45	66.7	VFG002965 (SSP0063) capsular polysaccharide biosynthesis protein Capsule (CVF110)	Staphylococcus saprophyticus subsp. saprophyticus ATCC 15305
scaffold_10125_1	108	VFG005353	336	1.2e-30	61.5	VFG005353 (plr/gapA) glyceraldehyde-3-phosphate dehydrogenase Streptococcal plasmin receptor/GAPDH (CVF123)	Streptococcus agalactiae A909
scaffold_10195_1	317	VFG005576	435	1.7e-117	66.0	VFG005576 (eno) phosphopyruvate hydratase Streptococcal enolase (CVF153)	Streptococcus agalactiae A909
scaffold_46771_1	58	VFG005576	435	2.5e-22	84.5	VFG005576 (eno) phosphopyruvate hydratase Streptococcal enolase (CVF153)	Streptococcus agalactiae A909
scaffold_50443_1	59	VFG005353	336	2.3e-15	62.1	VFG005353 (plr/gapA) glyceraldehyde-3-phosphate dehydrogenase Streptococcal plasmin receptor/GAPDH (CVF123)	Streptococcus agalactiae A909
scaffold_63239_1	69	VFG005576	435	3.2e-16	67.2	VFG005576 (eno) phosphopyruvate hydratase Streptococcal enolase (CVF153)	Streptococcus agalactiae A909
scaffold_63360_1	107	VFG005353	336	9.2e-31	62.5	VFG005353 (plr/gapA) glyceraldehyde-3-phosphate dehydrogenase Streptococcal plasmin receptor/GAPDH (CVF123)	Streptococcus agalactiae A909
scaffold_110_30	432	VFG018662	434	2.8e-158	65.2	VFG018662 (eno) enolase Streptococcal enolase (CVF153)	Streptococcus gordonii str. Challis substr. CH1
scaffold_125_1	62	VFG018664	289	1.1e-23	82.3	VFG018664 (rfbA-1) glucose-1-phosphate thymidylyltransferase Capsule (CVF186)	Streptococcus gordonii str. Challis substr. CH1
scaffold_888_10	62	VFG018664	289	1.1e-23	82.3	VFG018664 (rfbA-1) glucose-1-phosphate thymidylyltransferase Capsule (CVF186)	Streptococcus gordonii str. Challis substr. CH1
scaffold_2988_1	171	VFG018664	289	2.0e-59	65.1	VFG018664 (rfbA-1) glucose-1-phosphate thymidylyltransferase Capsule (CVF186)	Streptococcus gordonii str. Challis substr. CH1
scaffold_4675_1	187	VFG018662	434	5.7e-68	68.4	VFG018662 (eno) enolase Streptococcal enolase (CVF153)	Streptococcus gordonii str. Challis substr. CH1
scaffold_12759_1	363	VFG018662	434	9.5e-128	62.6	VFG018662 (eno) enolase Streptococcal enolase (CVF153)	Streptococcus gordonii str. Challis substr. CH1
scaffold_13747_1	320	VFG018662	434	2.1e-110	63.4	VFG018662 (eno) enolase Streptococcal enolase (CVF153)	Streptococcus gordonii str. Challis substr. CH1
scaffold_14242_1	289	VFG018664	289	2.5e-107	64.2	VFG018664 (rfbA-1) glucose-1-phosphate thymidylyltransferase Capsule (CVF186)	Streptococcus gordonii str. Challis substr. CH1
scaffold_15681_1	289	VFG018664	289	6.2e-106	63.7	VFG018664 (rfbA-1) glucose-1-phosphate thymidylyltransferase Capsule (CVF186)	Streptococcus gordonii str. Challis substr. CH1
scaffold_17586_2	174	VFG018662	434	9.3e-57	67.1	VFG018662 (eno) enolase Streptococcal enolase (CVF153)	Streptococcus gordonii str. Challis substr. CH1
scaffold_20330_1	142	VFG018662	434	1.6e-59	77.3	VFG018662 (eno) enolase Streptococcal enolase (CVF153)	Streptococcus gordonii str. Challis substr. CH1
scaffold_24200_1	227	VFG018664	289	2.7e-80	61.5	VFG018664 (rfbA-1) glucose-1-phosphate thymidylyltransferase Capsule (CVF186)	Streptococcus gordonii str. Challis substr. CH1
scaffold_25674_1	218	VFG018662	434	5.4e-78	65.3	VFG018662 (eno) enolase Streptococcal enolase (CVF153)	Streptococcus gordonii str. Challis substr. CH1
scaffold_70459_1	112	VFG018662	434	1.3e-32	64.3	VFG018662 (eno) enolase Streptococcal enolase (CVF153)	Streptococcus gordonii str. Challis substr. CH1
scaffold_4432_1	338	VFG005360	337	2.2e-123	67.0	VFG005360 (plr/gapA) glyceraldehyde-3-phosphate dehydrogenase Streptococcal plasmin receptor/GAPDH (CVF123)	Streptococcus mutans UA159
scaffold_5554_3	215	VFG005997	289	4.2e-83	68.5	VFG005997 (rmlA) putative glucose-1-phosphate thymidyltransferase Capsule (CVF186)	Streptococcus mutans UA159
scaffold_5819_2	338	VFG005360	337	4.0e-120	64.9	VFG005360 (plr/gapA) glyceraldehyde-3-phosphate dehydrogenase Streptococcal plasmin receptor/GAPDH (CVF123)	Streptococcus mutans UA159
scaffold_6243_1	81	VFG005360	337	3.4e-25	67.9	VFG005360 (plr/gapA) glyceraldehyde-3-phosphate dehydrogenase Streptococcal plasmin receptor/GAPDH (CVF123)	Streptococcus mutans UA159
scaffold_8650_1	286	VFG005997	289	8.3e-103	63.2	VFG005997 (rmlA) putative glucose-1-phosphate thymidyltransferase Capsule (CVF186)	Streptococcus mutans UA159
scaffold_10125_2	176	VFG005360	337	3.5e-75	81.2	VFG005360 (plr/gapA) glyceraldehyde-3-phosphate dehydrogenase Streptococcal plasmin receptor/GAPDH (CVF123)	Streptococcus mutans UA159
scaffold_26204_2	107	VFG005997	289	1.8e-42	74.8	VFG005997 (rmlA) putative glucose-1-phosphate thymidyltransferase Capsule (CVF186)	Streptococcus mutans UA159
scaffold_56796_1	130	VFG005997	289	3.6e-45	66.4	VFG005997 (rmlA) putative glucose-1-phosphate thymidyltransferase Capsule (CVF186)	Streptococcus mutans UA159
scaffold_65764_1	118	VFG005360	337	8.9e-43	78.6	VFG005360 (plr/gapA) glyceraldehyde-3-phosphate dehydrogenase Streptococcal plasmin receptor/GAPDH (CVF123)	Streptococcus mutans UA159
scaffold_76630_1	97	VFG005360	337	1.7e-39	81.3	VFG005360 (plr/gapA) glyceraldehyde-3-phosphate dehydrogenase Streptococcal plasmin receptor/GAPDH (CVF123)	Streptococcus mutans UA159
scaffold_182_37	336	VFG019078	359	7.4e-135	71.3	VFG019078 (plr/gapA) glyceraldehyde-3-phosphate dehydrogenase Streptococcal plasmin receptor/GAPDH (CVF123)	Streptococcus pneumoniae CGSP14
scaffold_187_14	336	VFG019078	359	9.7e-135	72.2	VFG019078 (plr/gapA) glyceraldehyde-3-phosphate dehydrogenase Streptococcal plasmin receptor/GAPDH (CVF123)	Streptococcus pneumoniae CGSP14
scaffold_676_2	434	VFG005579	434	9.2e-138	60.6	VFG005579 (eno) phosphopyruvate hydratase Streptococcal enolase (CVF153)	Streptococcus pneumoniae D39
scaffold_1488_3	493	VFG005992	412	6.9e-182	76.5	VFG005992 (cps2K) UDP-glucose 6-dehydrogenase, putative Capsule (CVF186)	Streptococcus pneumoniae D39
scaffold_1775_8	248	VFG005579	434	1.8e-85	64.1	VFG005579 (eno) phosphopyruvate hydratase Streptococcal enolase (CVF153)	Streptococcus pneumoniae D39
scaffold_3384_2	435	VFG005992	412	1.6e-177	73.5	VFG005992 (cps2K) UDP-glucose 6-dehydrogenase, putative Capsule (CVF186)	Streptococcus pneumoniae D39
scaffold_4454_1	308	VFG005579	434	4.4e-118	66.9	VFG005579 (eno) phosphopyruvate hydratase Streptococcal enolase (CVF153)	Streptococcus pneumoniae D39
scaffold_12263_1	59	VFG005579	434	8.4e-18	67.2	VFG005579 (eno) phosphopyruvate hydratase Streptococcal enolase (CVF153)	Streptococcus pneumoniae D39
scaffold_22767_1	237	VFG005579	434	6.3e-88	65.0	VFG005579 (eno) phosphopyruvate hydratase Streptococcal enolase (CVF153)	Streptococcus pneumoniae D39
scaffold_32587_1	185	VFG005579	434	3.3e-60	64.5	VFG005579 (eno) phosphopyruvate hydratase Streptococcal enolase (CVF153)	Streptococcus pneumoniae D39
scaffold_40367_1	105	VFG005579	434	4.5e-38	71.8	VFG005579 (eno) phosphopyruvate hydratase Streptococcal enolase (CVF153)	Streptococcus pneumoniae D39
scaffold_53270_1	135	VFG005579	434	6.6e-42	63.0	VFG005579 (eno) phosphopyruvate hydratase Streptococcal enolase (CVF153)	Streptococcus pneumoniae D39
scaffold_60507_1	125	VFG005992	412	3.2e-43	63.2	VFG005992 (cps2K) UDP-glucose 6-dehydrogenase, putative Capsule (CVF186)	Streptococcus pneumoniae D39
scaffold_67981_1	114	VFG005992	412	1.1e-45	73.7	VFG005992 (cps2K) UDP-glucose 6-dehydrogenase, putative Capsule (CVF186)	Streptococcus pneumoniae D39
scaffold_79732_1	99	VFG006015	289	1.6e-29	67.3	VFG006015 (cps2L) glucose-1-phosphate thymidylyltransferase Capsule (CVF186)	Streptococcus pneumoniae D39
scaffold_1235_7	292	VFG019127	362	2.5e-94	60.5	VFG019127 (SPH_0465) UDP-N-acetylglucosamine 2-epimerase Capsule (CVF186)	Streptococcus pneumoniae Hungary19A-6
scaffold_10958_1	51	VFG019127	362	1.4e-13	70.2	VFG019127 (SPH_0465) UDP-N-acetylglucosamine 2-epimerase Capsule (CVF186)	Streptococcus pneumoniae Hungary19A-6
scaffold_24328_1	227	VFG019127	362	4.0e-76	60.4	VFG019127 (SPH_0465) UDP-N-acetylglucosamine 2-epimerase Capsule (CVF186)	Streptococcus pneumoniae Hungary19A-6
scaffold_52595_1	87	VFG019127	362	4.3e-26	74.0	VFG019127 (SPH_0465) UDP-N-acetylglucosamine 2-epimerase Capsule (CVF186)	Streptococcus pneumoniae Hungary19A-6
scaffold_57621_1	128	VFG019127	362	2.1e-53	73.8	VFG019127 (SPH_0465) UDP-N-acetylglucosamine 2-epimerase Capsule (CVF186)	Streptococcus pneumoniae Hungary19A-6
scaffold_66630_1	116	VFG019127	362	4.2e-37	64.8	VFG019127 (SPH_0465) UDP-N-acetylglucosamine 2-epimerase Capsule (CVF186)	Streptococcus pneumoniae Hungary19A-6
scaffold_82432_1	41	VFG019127	362	4.8e-12	70.0	VFG019127 (SPH_0465) UDP-N-acetylglucosamine 2-epimerase Capsule (CVF186)	Streptococcus pneumoniae Hungary19A-6
scaffold_82_7	432	VFG005580	434	5.7e-156	65.2	VFG005580 (eno) phosphopyruvate hydratase Streptococcal enolase (CVF153)	Streptococcus pneumoniae TIGR4
scaffold_3223_1	130	VFG001374	351	2.1e-61	86.2	VFG001374 (cps4J) capsular polysaccharide biosynthesis protein Cps4J Capsule (VF0144)	Streptococcus pneumoniae TIGR4
scaffold_3384_5	114	VFG001376	394	2.8e-41	71.9	VFG001376 (cps4L) UDP-N-acetylglucosamine 2-epimerase Capsule (VF0144)	Streptococcus pneumoniae TIGR4
scaffold_3679_3	128	VFG001374	351	4.3e-59	83.5	VFG001374 (cps4J) capsular polysaccharide biosynthesis protein Cps4J Capsule (VF0144)	Streptococcus pneumoniae TIGR4
scaffold_4576_1	255	VFG005580	434	1.7e-83	62.2	VFG005580 (eno) phosphopyruvate hydratase Streptococcal enolase (CVF153)	Streptococcus pneumoniae TIGR4
scaffold_6212_1	236	VFG001374	351	1.3e-101	81.3	VFG001374 (cps4J) capsular polysaccharide biosynthesis protein Cps4J Capsule (VF0144)	Streptococcus pneumoniae TIGR4
scaffold_6212_2	398	VFG001375	409	1.4e-169	69.7	VFG001375 (cps4K) capsular polysaccharide biosynthesis protein Cps4K Capsule (VF0144)	Streptococcus pneumoniae TIGR4
scaffold_6277_1	388	VFG001375	409	3.8e-143	61.8	VFG001375 (cps4K) capsular polysaccharide biosynthesis protein Cps4K Capsule (VF0144)	Streptococcus pneumoniae TIGR4
scaffold_6277_2	237	VFG001374	351	1.3e-98	77.7	VFG001374 (cps4J) capsular polysaccharide biosynthesis protein Cps4J Capsule (VF0144)	Streptococcus pneumoniae TIGR4
scaffold_6455_1	368	VFG001373	365	5.3e-134	64.3	VFG001373 (cps4I) UDP-N-acetylglucosamine-2-epimerase Capsule (VF0144)	Streptococcus pneumoniae TIGR4
scaffold_15461_3	113	VFG001376	394	8.0e-41	71.8	VFG001376 (cps4L) UDP-N-acetylglucosamine 2-epimerase Capsule (VF0144)	Streptococcus pneumoniae TIGR4
scaffold_15461_4	223	VFG001376	394	3.2e-94	74.9	VFG001376 (cps4L) UDP-N-acetylglucosamine 2-epimerase Capsule (VF0144)	Streptococcus pneumoniae TIGR4
scaffold_18286_1	213	VFG005580	434	8.7e-73	65.7	VFG005580 (eno) phosphopyruvate hydratase Streptococcal enolase (CVF153)	Streptococcus pneumoniae TIGR4
scaffold_23594_1	203	VFG001373	365	6.8e-67	60.3	VFG001373 (cps4I) UDP-N-acetylglucosamine-2-epimerase Capsule (VF0144)	Streptococcus pneumoniae TIGR4
scaffold_29015_1	113	VFG001373	365	1.7e-30	63.4	VFG001373 (cps4I) UDP-N-acetylglucosamine-2-epimerase Capsule (VF0144)	Streptococcus pneumoniae TIGR4
scaffold_29018_2	113	VFG001373	365	1.7e-30	63.4	VFG001373 (cps4I) UDP-N-acetylglucosamine-2-epimerase Capsule (VF0144)	Streptococcus pneumoniae TIGR4
scaffold_34327_1	157	VFG001373	365	5.5e-56	65.4	VFG001373 (cps4I) UDP-N-acetylglucosamine-2-epimerase Capsule (VF0144)	Streptococcus pneumoniae TIGR4
scaffold_45247_1	150	VFG005580	434	6.8e-48	66.7	VFG005580 (eno) phosphopyruvate hydratase Streptococcal enolase (CVF153)	Streptococcus pneumoniae TIGR4
scaffold_82349_1	44	VFG001374	351	9.1e-17	88.6	VFG001374 (cps4J) capsular polysaccharide biosynthesis protein Cps4J Capsule (VF0144)	Streptococcus pneumoniae TIGR4
scaffold_347_20	336	VFG005341	336	2.9e-139	74.9	VFG005341 (plr/gapA) glyceraldehyde-3-phosphate dehydrogenase Streptococcal plasmin receptor/GAPDH (CVF123)	Streptococcus pyogenes M1 GAS
scaffold_5326_1	64	VFG005341	336	9.1e-26	82.5	VFG005341 (plr/gapA) glyceraldehyde-3-phosphate dehydrogenase Streptococcal plasmin receptor/GAPDH (CVF123)	Streptococcus pyogenes M1 GAS
scaffold_7817_2	309	VFG005341	336	3.9e-130	75.1	VFG005341 (plr/gapA) glyceraldehyde-3-phosphate dehydrogenase Streptococcal plasmin receptor/GAPDH (CVF123)	Streptococcus pyogenes M1 GAS
scaffold_67113_1	116	VFG005534	427	8.8e-27	61.7	VFG005534 (tig/ropA) trigger factor Trigger factor (CVF149)	Streptococcus pyogenes M1 GAS
scaffold_6_51	431	VFG005582	434	2.5e-159	67.0	VFG005582 (eno) Enolase, putative Streptococcal enolase (CVF153)	Streptococcus sanguinis SK36
scaffold_197_7	436	VFG005582	434	3.1e-149	64.4	VFG005582 (eno) Enolase, putative Streptococcal enolase (CVF153)	Streptococcus sanguinis SK36
scaffold_569_3	435	VFG005582	434	2.7e-153	65.5	VFG005582 (eno) Enolase, putative Streptococcal enolase (CVF153)	Streptococcus sanguinis SK36
scaffold_2709_3	306	VFG005898	289	9.8e-118	72.3	VFG005898 (rmlA) Glucose-1-phosphate thymidylytransferase, putative Capsule (CVF186)	Streptococcus sanguinis SK36
scaffold_18150_1	257	VFG005582	434	3.5e-84	64.0	VFG005582 (eno) Enolase, putative Streptococcal enolase (CVF153)	Streptococcus sanguinis SK36
scaffold_18157_1	257	VFG005582	434	3.5e-84	64.0	VFG005582 (eno) Enolase, putative Streptococcal enolase (CVF153)	Streptococcus sanguinis SK36
scaffold_27500_1	207	VFG006068	201	6.5e-57	61.7	VFG006068 (SSA_2220) Galactosyltransferase, putative Capsule (CVF186)	Streptococcus sanguinis SK36
scaffold_41027_1	114	VFG005582	434	4.9e-38	71.3	VFG005582 (eno) Enolase, putative Streptococcal enolase (CVF153)	Streptococcus sanguinis SK36
scaffold_44600_1	151	VFG005898	289	1.1e-53	68.3	VFG005898 (rmlA) Glucose-1-phosphate thymidylytransferase, putative Capsule (CVF186)	Streptococcus sanguinis SK36
scaffold_77275_1	102	VFG005862	348	3.0e-39	68.2	VFG005862 (rmlB) DTDP-glucose-4,6-dehydratase, putative Capsule (CVF186)	Streptococcus sanguinis SK36
scaffold_80142_1	80	VFG005862	348	6.3e-24	62.2	VFG005862 (rmlB) DTDP-glucose-4,6-dehydratase, putative Capsule (CVF186)	Streptococcus sanguinis SK36
scaffold_4675_3	225	VFG043469	435	1.3e-79	67.1	VFG043469 (SSU98_1513) phosphopyruvate hydratase Fibronectin-binding protein (AI215)	Streptococcus suis 98HAH33
scaffold_5018_1	161	VFG043469	435	5.4e-59	70.1	VFG043469 (SSU98_1513) phosphopyruvate hydratase Fibronectin-binding protein (AI215)	Streptococcus suis 98HAH33
scaffold_33390_1	74	VFG043469	435	2.8e-18	66.2	VFG043469 (SSU98_1513) phosphopyruvate hydratase Fibronectin-binding protein (AI215)	Streptococcus suis 98HAH33
scaffold_47539_2	66	VFG043469	435	3.8e-19	75.9	VFG043469 (SSU98_1513) phosphopyruvate hydratase Fibronectin-binding protein (AI215)	Streptococcus suis 98HAH33
scaffold_50883_2	89	VFG043469	435	4.4e-26	75.3	VFG043469 (SSU98_1513) phosphopyruvate hydratase Fibronectin-binding protein (AI215)	Streptococcus suis 98HAH33
scaffold_81227_1	73	VFG043469	435	2.7e-18	62.0	VFG043469 (SSU98_1513) phosphopyruvate hydratase Fibronectin-binding protein (AI215)	Streptococcus suis 98HAH33
scaffold_1480_1	230	VFG006052	289	8.8e-87	67.8	VFG006052 (rmlA) glucose-1-phosphate thymidyl transferase Capsule (CVF186)	Streptococcus thermophilus CNRZ1066
scaffold_11274_1	315	VFG006052	289	1.0e-109	65.3	VFG006052 (rmlA) glucose-1-phosphate thymidyl transferase Capsule (CVF186)	Streptococcus thermophilus CNRZ1066
scaffold_62487_1	110	VFG006052	289	1.5e-44	76.4	VFG006052 (rmlA) glucose-1-phosphate thymidyl transferase Capsule (CVF186)	Streptococcus thermophilus CNRZ1066
scaffold_63742_1	120	VFG006041	289	6.5e-41	64.1	VFG006041 (STER_1224) dTDP-glucose pyrophosphorylase Capsule (CVF186)	Streptococcus thermophilus LMD-9
scaffold_134_15	90	VFG007406	89	1.1e-29	68.2	VFG007406 (fliQ) flagellar biosynthesis protein Flagella (VF0519)	Vibrio cholerae O1 biovar El Tor str. N16961
scaffold_503_11	255	VFG007598	254	7.2e-90	67.9	VFG007598 (motA) flagellar motor protein Flagella (VF0519)	Vibrio cholerae O1 biovar El Tor str. N16961
scaffold_792_5	263	VFG007328	262	1.5e-103	69.5	VFG007328 (flgG) flagellar basal-body rod protein FlgG Flagella (VF0519)	Vibrio cholerae O1 biovar El Tor str. N16961
scaffold_865_8	166	VFG007665	465	1.2e-74	80.0	VFG007665 (cpsA) capsular polysaccharide biosynthesis glycosyltransferase, putative Capsular polysaccharide (CVF282)	Vibrio cholerae O1 biovar El Tor str. N16961
scaffold_1887_6	92	VFG007604	318	3.8e-33	74.4	VFG007604 (motB) flagellar motor protein Flagella (VF0519)	Vibrio cholerae O1 biovar El Tor str. N16961
scaffold_16308_2	114	VFG007604	318	2.0e-39	73.4	VFG007604 (motB) flagellar motor protein Flagella (VF0519)	Vibrio cholerae O1 biovar El Tor str. N16961
scaffold_20162_1	196	VFG007286	377	2.0e-47	61.7	VFG007286 (flaC) flagellin Flagella (VF0519)	Vibrio cholerae O1 biovar El Tor str. N16961
scaffold_26876_1	98	VFG018241	172	1.0e-44	83.7	VFG018241 (luxS) S-ribosylhomocysteinase AI-2 (VF0406)	Vibrio cholerae O1 biovar El Tor str. N16961
scaffold_28797_1	49	VFG006968	407	1.7e-11	68.9	VFG006968 (mshG) MSHA biogenesis protein MshG MSHA pili (VF0515)	Vibrio cholerae O1 biovar El Tor str. N16961
scaffold_34773_2	51	VFG007370	308	7.0e-21	90.2	VFG007370 (cheV) chemotaxis protein CheV Flagella (VF0519)	Vibrio cholerae O1 biovar El Tor str. N16961
scaffold_38085_1	167	VFG007633	413	8.7e-52	60.0	VFG007633 (wecC) UDP-N-acetyl-D-mannosaminuronic acid dehydrogenase Capsular polysaccharide (CVF282)	Vibrio cholerae O1 biovar El Tor str. N16961
scaffold_42364_1	84	VFG007292	379	1.3e-24	74.4	VFG007292 (flaA) flagellin Flagella (VF0519)	Vibrio cholerae O1 biovar El Tor str. N16961
scaffold_56181_1	57	VFG007292	379	4.9e-15	72.7	VFG007292 (flaA) flagellin Flagella (VF0519)	Vibrio cholerae O1 biovar El Tor str. N16961
scaffold_68023_1	114	VFG007255	254	3.9e-35	63.7	VFG007255 (vctC) iron(III) ABC transporter, ATP-binding protein Periplasmic binding protein-dependent ABC transport systems (CVF276)	Vibrio cholerae O1 biovar El Tor str. N16961
scaffold_78705_1	100	VFG007526	376	9.5e-38	80.0	VFG007526 (flaB) flagellin Flagella (VF0519)	Vibrio cholerae O1 biovar El Tor str. N16961
scaffold_80965_1	97	VFG007400	260	1.2e-24	61.9	VFG007400 (fliR) flagellar biosynthesis protein Flagella (VF0519)	Vibrio cholerae O1 biovar El Tor str. N16961
scaffold_134_18	699	VFG007593	697	1.2e-288	76.8	VFG007593 (flhA) flagellar biosynthetic protein FlhA Flagella (CVF281)	Vibrio cholerae O395
scaffold_134_21	241	VFG007579	243	1.3e-85	66.8	VFG007579 (fliA) flagellar biosynthesis sigma factor FliA Flagella (CVF281)	Vibrio fischeri ES114
scaffold_297_9	153	VFG007089	150	3.9e-59	74.8	VFG007089 (epsG) general secretion pathway protein G EPS type II secretion system (CVF268)	Vibrio fischeri ES114
scaffold_352_4	153	VFG007089	150	5.3e-64	78.5	VFG007089 (epsG) general secretion pathway protein G EPS type II secretion system (CVF268)	Vibrio fischeri ES114
scaffold_518_14	188	VFG007650	182	2.6e-81	81.8	VFG007650 (wbfU) undecaprenyl-phosphate beta-N-acetyl-D-fucosaminephosphotransferase Capsular polysaccharide (CVF282)	Vibrio fischeri ES114
scaffold_529_14	135	VFG007507	136	1.1e-44	63.4	VFG007507 (fliS) flagellar protein FliS Flagella (CVF281)	Vibrio fischeri ES114
scaffold_558_1	70	VFG007661	299	1.1e-21	64.2	VFG007661 (rmlA) Glucose-1-phosphate thymidylyltransferase Capsular polysaccharide (CVF282)	Vibrio fischeri ES114
scaffold_792_10	137	VFG007363	131	1.3e-40	60.3	VFG007363 (flgB) flagellar basal body protein Flagella (CVF281)	Vibrio fischeri ES114
scaffold_1710_2	356	VFG007659	364	1.3e-169	79.7	VFG007659 (rmlB) dTDP-glucose 4,6-dehydratase Capsular polysaccharide (CVF282)	Vibrio fischeri ES114
scaffold_3043_1	289	VFG007661	299	4.0e-105	61.3	VFG007661 (rmlA) Glucose-1-phosphate thymidylyltransferase Capsular polysaccharide (CVF282)	Vibrio fischeri ES114
scaffold_3106_3	229	VFG007659	364	3.0e-87	70.7	VFG007659 (rmlB) dTDP-glucose 4,6-dehydratase Capsular polysaccharide (CVF282)	Vibrio fischeri ES114
scaffold_13872_1	221	VFG007661	299	3.7e-74	61.3	VFG007661 (rmlA) Glucose-1-phosphate thymidylyltransferase Capsular polysaccharide (CVF282)	Vibrio fischeri ES114
scaffold_16778_2	167	VFG007659	364	3.2e-70	77.8	VFG007659 (rmlB) dTDP-glucose 4,6-dehydratase Capsular polysaccharide (CVF282)	Vibrio fischeri ES114
scaffold_26368_1	214	VFG007655	635	2.7e-82	71.1	VFG007655 (wbfY) UDP-D-quinovosamine 4-dehydrogenase Capsular polysaccharide (CVF282)	Vibrio fischeri ES114
scaffold_47075_1	82	VFG007375	306	9.9e-33	79.3	VFG007375 (cheV) chemotaxis protein CheV Flagella (CVF281)	Vibrio fischeri ES114
scaffold_51868_1	138	VFG006967	574	5.5e-44	60.6	VFG006967 (mshE) type 4 fimbrial assembly protein PilB Mannose-sensitive hemagglutinin (MSHA type IV pilus) (CVF259)	Vibrio fischeri ES114
scaffold_59154_1	127	VFG007659	364	2.7e-53	77.2	VFG007659 (rmlB) dTDP-glucose 4,6-dehydratase Capsular polysaccharide (CVF282)	Vibrio fischeri ES114
scaffold_65076_2	70	VFG007661	299	1.1e-21	65.7	VFG007661 (rmlA) Glucose-1-phosphate thymidylyltransferase Capsular polysaccharide (CVF282)	Vibrio fischeri ES114
scaffold_69709_1	112	VFG007297	379	5.1e-32	65.2	VFG007297 (flaA) flagellin Flagella (CVF281)	Vibrio fischeri ES114
scaffold_71330_1	110	VFG007655	635	4.0e-29	61.0	VFG007655 (wbfY) UDP-D-quinovosamine 4-dehydrogenase Capsular polysaccharide (CVF282)	Vibrio fischeri ES114
scaffold_71744_1	110	VFG007659	364	6.2e-30	70.9	VFG007659 (rmlB) dTDP-glucose 4,6-dehydratase Capsular polysaccharide (CVF282)	Vibrio fischeri ES114
scaffold_80228_1	87	VFG007609	309	7.5e-31	81.9	VFG007609 (motB) flagellar motor protein Flagella (CVF281)	Vibrio fischeri ES114
scaffold_81520_1	96	VFG007537	375	1.7e-28	66.3	VFG007537 (flaD) flagellin Flagella (CVF281)	Vibrio fischeri ES114
scaffold_134_1	443	VFG007501	493	1.4e-157	64.0	VFG007501 (flrA) FlrA; sigma-54-dependent transcriptional activator Flagella (CVF281)	Vibrio fischeri ES114
scaffold_97_17	246	VFG043152	252	1.0e-85	71.8	VFG043152 (fliP) flagellar biosynthesis protein FliP lateral flagella (AI142)	Vibrio parahaemolyticus RIMD 2210633
scaffold_97_34	262	VFG043132	261	2.1e-100	68.6	VFG043132 (flgG) putative flagellar basal-body rod protein lateral flagella (AI142)	Vibrio parahaemolyticus RIMD 2210633
scaffold_134_7	440	VFG007456	439	2.4e-194	77.1	VFG007456 (fliI) flagellum-specific ATP synthase Flagella (CVF281)	Vibrio parahaemolyticus RIMD 2210633
scaffold_134_14	262	VFG007414	289	8.5e-86	75.6	VFG007414 (fliP) flagellar biosynthesis protein Flagella (CVF281)	Vibrio parahaemolyticus RIMD 2210633
scaffold_134_26	163	VFG007546	164	7.1e-67	83.4	VFG007546 (cheW) chemotaxis protein CheW Flagella (CVF281)	Vibrio parahaemolyticus RIMD 2210633
scaffold_679_5	168	VFG018243	172	2.1e-74	79.5	VFG018243 (luxS) S-ribosylhomocysteinase Autoinducer-2 (CVF628)	Vibrio parahaemolyticus RIMD 2210633
scaffold_792_4	371	VFG007318	363	2.4e-142	73.0	VFG007318 (flgI) flagellar P-ring protein precursor Flagella (CVF281)	Vibrio parahaemolyticus RIMD 2210633
scaffold_792_9	138	VFG007354	137	7.9e-51	73.7	VFG007354 (flgC) flagellar basal body rod protein Flagella (CVF281)	Vibrio parahaemolyticus RIMD 2210633
scaffold_847_6	170	VFG018243	172	6.3e-74	78.1	VFG018243 (luxS) S-ribosylhomocysteinase Autoinducer-2 (CVF628)	Vibrio parahaemolyticus RIMD 2210633
scaffold_1887_5	252	VFG007600	253	9.6e-95	71.2	VFG007600 (motA) flagellar motor protein Flagella (CVF281)	Vibrio parahaemolyticus RIMD 2210633
scaffold_3806_5	86	VFG006916	289	1.0e-24	60.0	VFG006916 (pilD) type IV prepilin-like proteins leader peptide processing enzyme Type IV pilus (CVF258)	Vibrio parahaemolyticus RIMD 2210633
scaffold_5990_4	87	VFG007600	253	9.5e-26	70.1	VFG007600 (motA) flagellar motor protein Flagella (CVF281)	Vibrio parahaemolyticus RIMD 2210633
scaffold_10854_1	63	VFG007600	253	1.3e-16	71.0	VFG007600 (motA) flagellar motor protein Flagella (CVF281)	Vibrio parahaemolyticus RIMD 2210633
scaffold_13032_3	103	VFG007576	244	2.2e-21	62.4	VFG007576 (fliA) flagellar biosynthesis sigma factor FliA Flagella (CVF281)	Vibrio parahaemolyticus RIMD 2210633
scaffold_20471_2	170	VFG018243	172	7.0e-73	77.5	VFG018243 (luxS) S-ribosylhomocysteinase Autoinducer-2 (CVF628)	Vibrio parahaemolyticus RIMD 2210633
scaffold_22183_1	90	VFG043153	89	8.3e-25	64.0	VFG043153 (fliQ) flagellar biosynthetic protein lateral flagella (AI142)	Vibrio parahaemolyticus RIMD 2210633
scaffold_55817_1	131	VFG007486	469	3.3e-54	80.6	VFG007486 (flrC) FlaM Flagella (CVF281)	Vibrio parahaemolyticus RIMD 2210633
scaffold_57084_1	130	VFG007558	744	8.3e-42	73.9	VFG007558 (cheA) chemotaxis protein CheA Flagella (CVF281)	Vibrio parahaemolyticus RIMD 2210633
scaffold_61235_1	124	VFG043143	449	3.2e-51	77.4	VFG043143 (fliI) putative flagellum-specific ATP synthase lateral flagella (AI142)	Vibrio parahaemolyticus RIMD 2210633
scaffold_134_12	129	VFG007427	136	1.4e-44	70.9	VFG007427 (fliN) flagellar motor switch protein Flagella (CVF281)	Vibrio vulnificus CMCP6
scaffold_134_17	378	VFG007397	376	1.4e-126	64.1	VFG007397 (flhB) flagellar biosynthesis protein Flagella (CVF281)	Vibrio vulnificus CMCP6
scaffold_134_20	297	VFG007583	295	6.2e-117	71.5	VFG007583 (flhG) Flagellar biosynthesis MinD-related protein Flagella (CVF281)	Vibrio vulnificus CMCP6
scaffold_352_6	514	VFG007099	499	1.2e-195	72.2	VFG007099 (epsE) Type II secretory pathway, ATPase EpsE eps (SS214)	Vibrio vulnificus CMCP6
scaffold_1635_1	279	VFG007367	275	6.0e-114	70.5	VFG007367 (cheR) Methylase of chemotaxis methyl-accepting protein CheR Flagella (CVF281)	Vibrio vulnificus CMCP6
scaffold_15707_2	66	VFG018244	172	7.7e-20	71.9	VFG018244 (luxS) S-ribosylhomocysteinase Autoinducer-2 (CVF628)	Vibrio vulnificus CMCP6
scaffold_35249_1	176	VFG007656	388	9.7e-78	77.3	VFG007656 (wbfV/wcvB) Predicted UDP-glucose 6-dehydrogenase Capsular polysaccharide (CVF282)	Vibrio vulnificus CMCP6
scaffold_47745_1	145	VFG007656	388	1.3e-64	80.7	VFG007656 (wbfV/wcvB) Predicted UDP-glucose 6-dehydrogenase Capsular polysaccharide (CVF282)	Vibrio vulnificus CMCP6
scaffold_50367_1	141	VFG007653	650	3.9e-53	71.6	VFG007653 (wbfY) Predicted nucleoside-diphosphate sugar epimerase Capsular polysaccharide (CVF282)	Vibrio vulnificus CMCP6
scaffold_52535_1	137	VFG007639	356	3.5e-43	60.2	VFG007639 (wbjD/wecB) UDP-N-acetylglucosamine 2-epimerase Capsular polysaccharide (CVF282)	Vibrio vulnificus CMCP6
scaffold_54190_1	134	VFG007653	650	8.0e-48	71.8	VFG007653 (wbfY) Predicted nucleoside-diphosphate sugar epimerase Capsular polysaccharide (CVF282)	Vibrio vulnificus CMCP6
scaffold_57217_1	130	VFG042880	368	2.6e-51	67.7	VFG042880 (pilU) type IV pilus (Tfp) assembly protein, ATPase PilU type IV pili (AI113)	Vibrio vulnificus CMCP6
scaffold_58596_1	128	VFG007656	388	5.3e-49	68.8	VFG007656 (wbfV/wcvB) Predicted UDP-glucose 6-dehydrogenase Capsular polysaccharide (CVF282)	Vibrio vulnificus CMCP6
scaffold_58809_1	66	VFG018244	172	1.7e-19	70.3	VFG018244 (luxS) S-ribosylhomocysteinase Autoinducer-2 (CVF628)	Vibrio vulnificus CMCP6
scaffold_69777_1	112	VFG007639	356	8.4e-35	63.4	VFG007639 (wbjD/wecB) UDP-N-acetylglucosamine 2-epimerase Capsular polysaccharide (CVF282)	Vibrio vulnificus CMCP6
scaffold_73166_1	108	VFG007629	727	1.9e-28	64.1	VFG007629 (wzc) Putative tyrosine-protein kinase Wzc Capsular polysaccharide (CVF282)	Vibrio vulnificus CMCP6
scaffold_74777_1	105	VFG007487	471	7.9e-43	82.5	VFG007487 (flrC) Response regulator Flagella (CVF281)	Vibrio vulnificus CMCP6
scaffold_75893_1	104	VFG007367	275	1.7e-37	70.2	VFG007367 (cheR) Methylase of chemotaxis methyl-accepting protein CheR Flagella (CVF281)	Vibrio vulnificus CMCP6
scaffold_79988_1	98	VFG007635	423	1.6e-34	68.0	VFG007635 (wecC) UDP-N-acetyl-D-mannosaminuronate dehydrogenase Capsular polysaccharide (CVF282)	Vibrio vulnificus CMCP6
scaffold_512_9	277	VFG045346	269	3.2e-99	65.1	VFG045346 (IlpA) immunogenic lipoprotein A IlpA (VF0513)	Vibrio vulnificus YJ016
scaffold_649_11	270	VFG045346	269	4.4e-106	69.9	VFG045346 (IlpA) immunogenic lipoprotein A IlpA (VF0513)	Vibrio vulnificus YJ016
scaffold_810_10	205	VFG007642	205	7.1e-64	61.1	VFG007642 (wcaJ) putative UDP-galactose phosphate transferase Capsular polysaccharide (CVF282)	Vibrio vulnificus YJ016
scaffold_1241_1	158	VFG007636	420	1.2e-63	76.1	VFG007636 (wecC) UDP-N-acetyl-D-mannosaminuronate dehydrogenase Capsular polysaccharide (CVF282)	Vibrio vulnificus YJ016
scaffold_1241_2	378	VFG007640	379	1.5e-160	74.5	VFG007640 (wbjD/wecB) UDP-N-acetylglucosamine 2-epimerase Capsular polysaccharide (CVF282)	Vibrio vulnificus YJ016
scaffold_1492_3	203	VFG007642	205	1.2e-66	63.1	VFG007642 (wcaJ) putative UDP-galactose phosphate transferase Capsular polysaccharide (CVF282)	Vibrio vulnificus YJ016
scaffold_4537_3	275	VFG045346	269	2.0e-98	63.9	VFG045346 (IlpA) immunogenic lipoprotein A IlpA (VF0513)	Vibrio vulnificus YJ016
scaffold_13785_1	204	VFG007640	379	7.5e-82	72.1	VFG007640 (wbjD/wecB) UDP-N-acetylglucosamine 2-epimerase Capsular polysaccharide (CVF282)	Vibrio vulnificus YJ016
scaffold_14254_1	192	VFG007663	185	8.4e-59	60.8	VFG007663 (rmlC) dTDP-6-deoxy-D-xylo-4-hexulose-3,5-epimerase Capsular polysaccharide (CVF282)	Vibrio vulnificus YJ016
scaffold_14262_2	192	VFG007663	185	1.4e-58	61.5	VFG007663 (rmlC) dTDP-6-deoxy-D-xylo-4-hexulose-3,5-epimerase Capsular polysaccharide (CVF282)	Vibrio vulnificus YJ016
scaffold_15009_2	121	VFG007642	205	2.5e-40	65.3	VFG007642 (wcaJ) putative UDP-galactose phosphate transferase Capsular polysaccharide (CVF282)	Vibrio vulnificus YJ016
scaffold_35644_1	138	VFG045346	269	4.5e-54	74.5	VFG045346 (IlpA) immunogenic lipoprotein A IlpA (VF0513)	Vibrio vulnificus YJ016
scaffold_47039_1	147	VFG007642	205	4.9e-59	73.5	VFG007642 (wcaJ) putative UDP-galactose phosphate transferase Capsular polysaccharide (CVF282)	Vibrio vulnificus YJ016
scaffold_48170_1	144	VFG007640	379	1.6e-41	64.5	VFG007640 (wbjD/wecB) UDP-N-acetylglucosamine 2-epimerase Capsular polysaccharide (CVF282)	Vibrio vulnificus YJ016
scaffold_57986_1	128	VFG007642	205	1.8e-57	78.9	VFG007642 (wcaJ) putative UDP-galactose phosphate transferase Capsular polysaccharide (CVF282)	Vibrio vulnificus YJ016
scaffold_65490_1	118	VFG007259	251	7.8e-39	63.2	VFG007259 (vctC) catechol siderophore ABC transporter, ATP-binding protein Periplasmic binding protein-dependent ABC transport systems (CVF276)	Vibrio vulnificus YJ016
scaffold_73219_1	103	VFG007660	295	1.8e-44	80.6	VFG007660 (rmlA) D-glucose-1-phosphate thymidylyltransferase Capsular polysaccharide (CVF282)	Vibrio vulnificus YJ016
scaffold_75755_1	104	VFG007636	420	7.8e-43	77.9	VFG007636 (wecC) UDP-N-acetyl-D-mannosaminuronate dehydrogenase Capsular polysaccharide (CVF282)	Vibrio vulnificus YJ016
scaffold_76464_1	103	VFG007636	420	6.6e-34	70.8	VFG007636 (wecC) UDP-N-acetyl-D-mannosaminuronate dehydrogenase Capsular polysaccharide (CVF282)	Vibrio vulnificus YJ016
scaffold_79582_1	98	VFG045346	269	7.9e-37	73.5	VFG045346 (IlpA) immunogenic lipoprotein A IlpA (VF0513)	Vibrio vulnificus YJ016
scaffold_59288_1	126	VFG007658	353	1.7e-44	66.1	VFG007658 (rmlB) dTDP-D-glucose 4;6-dehydratase Capsular polysaccharide (CVF282)	Vibrio vulnificus YJ016
scaffold_402_17	107	VFG042353	1470	3.2e-23	60.4	VFG042353 (XNC1_4556) XhlA, cell surface associated hemolysin (TpsA) XhlA-XhlB (SS142)	Xenorhabdus nematophila ATCC 19061
scaffold_518_6	371	VFG002365	372	1.4e-174	80.6	VFG002365 (gmd) GDP-mannose 4,6-dehydratase O-antigen (VF0392)	Yersinia enterocolitica subsp. enterocolitica 8081
scaffold_7188_1	402	VFG002363	465	1.3e-146	61.2	VFG002363 (manC) mannose-1-phosphate guanylyltransferase O-antigen (VF0392)	Yersinia enterocolitica subsp. enterocolitica 8081
scaffold_10356_1	166	VFG002362	456	2.0e-61	67.7	VFG002362 (manB) phosphomannomutase O-antigen (VF0392)	Yersinia enterocolitica subsp. enterocolitica 8081
scaffold_17324_1	87	VFG002362	456	1.7e-35	81.6	VFG002362 (manB) phosphomannomutase O-antigen (VF0392)	Yersinia enterocolitica subsp. enterocolitica 8081
scaffold_788_8	283	VFG023800	478	1.3e-124	77.8	VFG023800 (YE105_C1181) TrsG protein-like protein O-antigen (CVF043)	Yersinia enterocolitica subsp. palearctica 105.5R(r)
scaffold_13785_2	120	VFG023778	358	8.4e-49	73.1	VFG023778 (YE105_C0173) lipopolysaccharide biosynthesis protein WzzE O-antigen (CVF043)	Yersinia enterocolitica subsp. palearctica 105.5R(r)
scaffold_26937_1	182	VFG023778	358	1.4e-63	67.6	VFG023778 (YE105_C0173) lipopolysaccharide biosynthesis protein WzzE O-antigen (CVF043)	Yersinia enterocolitica subsp. palearctica 105.5R(r)
scaffold_518_9	469	VFG002692	470	2.9e-177	65.6	VFG002692 (manC) mannose-1-phosphate guanylyltransferase O-antigen (CVF043)	Yersinia pestis CO92
scaffold_39683_1	115	VFG044140	465	2.9e-46	80.2	VFG044140 (hasF) outer membrane channel protein HasA-type hemophore-mediated heme uptake system (IA044)	Yersinia pestis CO92
scaffold_40802_1	160	VFG002692	470	4.0e-46	61.5	VFG002692 (manC) mannose-1-phosphate guanylyltransferase O-antigen (CVF043)	Yersinia pestis CO92
scaffold_57706_1	80	VFG043246	303	8.2e-16	62.9	VFG043246 (motB) hypothetical protein lateral flagella (AI146)	Yersinia pestis CO92
scaffold_518_7	326	VFG002764	321	1.3e-157	83.1	VFG002764 (wcaG) nucleotide di-P-sugar epimerase or dehydratase O-antigen (CVF043)	Yersinia pestis KIM 10
scaffold_43384_1	154	VFG002764	321	9.8e-50	60.1	VFG002764 (wcaG) nucleotide di-P-sugar epimerase or dehydratase O-antigen (CVF043)	Yersinia pestis KIM 10
scaffold_51162_1	101	VFG017855	310	3.3e-30	62.2	VFG017855 (pilW) putative transposase Type IV pili (CVF049)	Yersinia pseudotuberculosis IP 31758
scaffold_62922_1	121	VFG017855	310	6.5e-41	64.4	VFG017855 (pilW) putative transposase Type IV pili (CVF049)	Yersinia pseudotuberculosis IP 31758
scaffold_4171_4	223	VFG003402	373	7.2e-86	70.5	VFG003402 (gmd) GDP-D-mannose dehydratase O-antigen (CVF043)	Yersinia pseudotuberculosis IP 32953
scaffold_12606_1	307	VFG003402	373	2.9e-109	65.7	VFG003402 (gmd) GDP-D-mannose dehydratase O-antigen (CVF043)	Yersinia pseudotuberculosis IP 32953
scaffold_29574_1	198	VFG003402	373	1.7e-75	68.2	VFG003402 (gmd) GDP-D-mannose dehydratase O-antigen (CVF043)	Yersinia pseudotuberculosis IP 32953
scaffold_37973_1	168	VFG019017	457	3.3e-75	75.6	VFG019017 (YPK_3178) Phosphomannomutase O-antigen (CVF043)	Yersinia pseudotuberculosis YPIII
