# Supplementary material for: First metagenomic analysis of the Andean condor (Vultur gryphus) gut microbiome reveals microbial diversity and wide resistome
Source: PeerJ. 2023 Jul 7;11:e15235. doi: 10.7717/peerj.15235 (PMC10332357; doi:10.7717/peerj.15235)
Supplement: Supplemental Information 4 [file peerj-11-15235-s004.xlsx]

## Sheet: AMR_Annotation
geneID	length	Target_id	Target_length	E-value	Identity	Query_Coverage	Target_name	Specie
scaffold_33_83	165	AAY32951.1	164	1.5e-95	97.6	99.4	lnuC	Streptococcus agalactiae
scaffold_56_12	570	ABG86067.1	569	2e-280	84.2	99.8	Clostridium perfringens mprF	Clostridium perfringens SM101
scaffold_159_4	258	AAC36915.1	257	2.1e-149	100	99.6	ErmQ	Clostridium perfringens
scaffold_485_17	345	AAA20116.1	420	7.2e-185	98.3	100	tetA(P)	Clostridium perfringens
scaffold_659_15	653	AAA20117.1	652	0	99.5	99.8	tetB(P)	Clostridium perfringens
scaffold_659_16	105	AAA20116.1	420	6.4e-52	98.1	99	tetA(P)	Clostridium perfringens
scaffold_685_7	211	BAE77933.1	210	6.3e-115	96.7	99.5	CRP	Escherichia coli str. K-12 substr. W3110
scaffold_767_8	461	AAA22851.1	458	5e-226	88	99.3	tet(L)	Geobacillus stearothermophilus
scaffold_1276_4	167	ACS83559.1	166	1.2e-100	99.4	99.4	LnuP	Clostridium perfringens
scaffold_1752_1	159	ABG86067.1	569	2e-89	99.4	99.4	Clostridium perfringens mprF	Clostridium perfringens SM101
scaffold_1976_2	213	BAE77933.1	210	1.2e-102	84.9	99.5	CRP	Escherichia coli str. K-12 substr. W3110
scaffold_2239_2	280	AAP69916.1	254	9.1e-146	99.6	90.7	OXA-85	Fusobacterium nucleatum
scaffold_5153_2	227	ABG56269.1	226	1.9e-93	99.1	99.6	QnrB10	Citrobacter freundii
scaffold_5706_1	397	ABG86067.1	569	6.9e-216	97.5	100	Clostridium perfringens mprF	Clostridium perfringens SM101
scaffold_9556_2	82	AAA26652.1	161	5.9e-45	97.5	98.8	lnuA	Staphylococcus haemolyticus
scaffold_11764_1	90	BAE77933.1	210	8.2e-40	81.1	100	CRP	Escherichia coli str. K-12 substr. W3110
scaffold_12071_3	221	AAN06707.1	424	4.2e-122	100	99.5	tet(A)	Shigella sonnei
scaffold_18488_1	264	BAE78082.1	488	7.5e-142	99.6	99.6	mdtP	Escherichia coli str. K-12 substr. W3110
scaffold_18848_1	272	BAB38260.1	457	9.1e-151	100	100	cpxA	Escherichia coli O157:H7 str. Sakai
scaffold_19395_2	156	AAC77110.1	377	3.7e-88	98.7	100	Escherichia coli ampC	Escherichia coli str. K-12 substr. MG1655
scaffold_21897_1	157	BAC67143.1	401	2e-81	99.4	100	tet(B)	Gram-negative bacterium TC71
scaffold_23484_1	224	BAE78083.1	683	3.4e-119	98.6	97.3	mdtO	Escherichia coli str. K-12 substr. W3110
scaffold_26620_1	195	AAN06707.1	424	9.3e-105	100	100	tet(A)	Shigella sonnei
scaffold_27106_1	152	BAE77781.1	385	1.9e-81	100	99.3	mdtE	Escherichia coli str. K-12 substr. W3110
scaffold_27106_2	50	AAC76539.1	1037	8.6e-23	100	100	mdtF	Escherichia coli str. K-12 substr. MG1655
scaffold_27493_1	92	CCP46065.1	228	2.5e-44	89	98.9	mtrA	Mycobacterium tuberculosis H37Rv
scaffold_28739_1	202	BAA15934.1	467	3.2e-116	100	100	baeS	Escherichia coli str. K-12 substr. W3110
scaffold_28785_2	134	BAB38260.1	457	5.4e-72	100	100	cpxA	Escherichia coli O157:H7 str. Sakai
scaffold_29264_1	186	ANK04027.1	242	4.4e-96	92.5	100	gadW	Escherichia coli O25b:H4
scaffold_33992_1	180	AAC75429.1	1197	4e-102	100	100	evgS	Escherichia coli str. K-12 substr. MG1655
scaffold_34276_1	179	ABS43901.1	367	3.5e-74	83.2	100	cmeA	Campylobacter jejuni subsp. doylei 269.97
scaffold_35153_2	117	BAE77933.1	210	8.1e-56	90.5	99.1	CRP	Escherichia coli str. K-12 substr. W3110
scaffold_35733_1	105	BAE77933.1	210	1.1e-48	88.5	99	CRP	Escherichia coli str. K-12 substr. W3110
scaffold_36792_1	140	AAA20116.1	420	3.2e-67	94.3	100	tetA(P)	Clostridium perfringens
scaffold_39683_1	115	ACN32294.1	495	1.6e-59	100	100	tolC	Escherichia coli
scaffold_40339_1	79	AAA26652.1	161	9.1e-43	97.5	100	lnuA	Staphylococcus haemolyticus
scaffold_42027_1	157	AAC73564.1	1049	4.5e-86	100	100	acrB	Escherichia coli str. K-12 substr. MG1655
scaffold_42111_1	134	AAA22851.1	458	4.5e-66	99.2	99.3	tet(L)	Geobacillus stearothermophilus
scaffold_43621_1	154	AAC74000.1	582	9.3e-84	100	100	msbA	Escherichia coli str. K-12 substr. MG1655
scaffold_44920_1	151	BAJ42218.1	385	3.4e-78	99.3	96	Escherichia coli ampH	Escherichia coli DH1
scaffold_46138_1	93	AAA20116.1	420	4.1e-42	92.4	98.9	tetA(P)	Clostridium perfringens
scaffold_46400_1	124	AAC73564.1	1049	3.6e-62	100	99.2	acrB	Escherichia coli str. K-12 substr. MG1655
scaffold_46672_1	147	AAA22851.1	458	1.5e-75	100	100	tet(L)	Geobacillus stearothermophilus
scaffold_47471_1	146	BAE78084.1	343	2e-75	100	97.9	mdtN	Escherichia coli str. K-12 substr. W3110
scaffold_48409_1	95	BAE77933.1	210	1.2e-44	91.5	98.9	CRP	Escherichia coli str. K-12 substr. W3110
scaffold_48930_1	30	AAC75137.1	1025	4.1e-12	100	96.7	mdtC	Escherichia coli str. K-12 substr. MG1655
scaffold_50234_1	80	BAE77778.1	274	2.3e-41	97.5	100	gadX	Escherichia coli str. K-12 substr. W3110
scaffold_50278_1	140	AAC60780.1	563	1.7e-60	87.9	100	rosB	Yersinia enterocolitica (type O:8)
scaffold_52117_1	137	AAC76297.1	385	2.2e-68	100	100	acrE	Escherichia coli str. K-12 substr. MG1655
scaffold_53386_1	135	BAA11236.1	351	2.3e-70	100	100	emrK	Escherichia coli
scaffold_54499_1	134	AAC76298.1	1034	1.2e-71	98.5	100	acrF	Escherichia coli str. K-12 substr. MG1655
scaffold_56331_1	91	BAA15935.1	240	3.4e-49	100	98.9	baeR	Escherichia coli str. K-12 substr. W3110
scaffold_60183_1	125	AAC75733.1	512	1.1e-63	100	100	emrB	Escherichia coli str. K-12 substr. MG1655
scaffold_60657_1	124	BAA11236.1	351	1.1e-66	99.2	100	emrK	Escherichia coli
scaffold_61485_1	123	AAC74000.1	582	8.8e-61	100	100	msbA	Escherichia coli str. K-12 substr. MG1655
scaffold_61627_1	123	BAE77781.1	385	2.8e-59	99.2	100	mdtE	Escherichia coli str. K-12 substr. W3110
scaffold_64245_1	119	CBJ02047.1	434	7.2e-68	100	100	Escherichia coli ampC1 beta-lactamase	Escherichia coli ETEC H10407
scaffold_65534_1	118	AAC76539.1	1037	1.1e-63	100	100	mdtF	Escherichia coli str. K-12 substr. MG1655
scaffold_65626_1	73	AAC75429.1	1197	1.8e-37	100	98.6	evgS	Escherichia coli str. K-12 substr. MG1655
scaffold_67152_1	115	AAC73565.1	397	1.3e-61	100	100	Escherichia coli acrA	Escherichia coli str. K-12 substr. MG1655
scaffold_67195_1	80	BAB35162.1	137	3e-41	100	98.8	H-NS	Escherichia coli O157:H7 str. Sakai
scaffold_69662_1	113	AAC75429.1	1197	1.7e-63	100	100	evgS	Escherichia coli str. K-12 substr. MG1655
scaffold_69891_1	98	BAC67143.1	401	1.2e-49	99	99	tet(B)	Gram-negative bacterium TC71
scaffold_69998_1	112	BAD59497.1	1162	1.1e-57	87.5	100	Nocardia rifampin resistant beta-subunit of RNA polymerase (rpoB2)	Nocardia farcinica IFM 10152
scaffold_70147_1	73	CCP46065.1	228	1.2e-33	91.4	95.9	mtrA	Mycobacterium tuberculosis H37Rv
scaffold_72402_1	108	AAC75137.1	1025	3.7e-55	100	100	mdtC	Escherichia coli str. K-12 substr. MG1655
scaffold_73024_1	108	ABS43151.1	1040	3.9e-52	95.4	100	cmeB	Campylobacter jejuni subsp. doylei 269.97
scaffold_74359_1	106	BAE78082.1	488	8.7e-57	99.1	100	mdtP	Escherichia coli str. K-12 substr. W3110
scaffold_75942_1	104	ABS43151.1	1040	4.8e-52	93.3	100	cmeB	Campylobacter jejuni subsp. doylei 269.97
scaffold_76240_1	98	AAC76298.1	1034	2.6e-47	100	100	acrF	Escherichia coli str. K-12 substr. MG1655
scaffold_80538_1	37	ADP36409.1	1107	2.3e-12	80.6	83.8	Bifidobacteria intrinsic ileS conferring resistance to mupirocin	Bifidobacterium bifidum PRL2010

## Sheet: MetaFunctions_and_Mechanism
ARG_ID	MetaFunction	Antibiotic_Resistance	Mechanism	Count	Name	Specie
ADP36409.1	antibiotic-resistant isoleucyl-tRNA synthetase (ileS)	mupirocin	antibiotic target alteration	1	Bifidobacteria intrinsic ileS conferring resistance to mupirocin	Bifidobacterium bifidum PRL2010
ABS43151.1	resistance-nodulation-cell division (RND) antibiotic efflux pump	cephalosporin;fluoroquinolone antibiotic;fusidic acid;macrolide antibiotic	antibiotic efflux	2	cmeB	Campylobacter jejuni subsp. doylei 269.97
ABS43901.1	resistance-nodulation-cell division (RND) antibiotic efflux pump	cephalosporin;fluoroquinolone antibiotic;fusidic acid;macrolide antibiotic	antibiotic efflux	1	cmeA	Campylobacter jejuni subsp. doylei 269.97
ABG56269.1	quinolone resistance protein (qnr)	fluoroquinolone antibiotic	antibiotic target protection	1	QnrB10	Citrobacter freundii
AAA20116.1	major facilitator superfamily (MFS) antibiotic efflux pump	tetracycline antibiotic	antibiotic efflux	4	tetA(P)	Clostridium perfringens
AAA20117.1	tetracycline-resistant ribosomal protection protein	tetracycline antibiotic	antibiotic target protection	1	tetB(P)	Clostridium perfringens
AAC36915.1	Erm 23S ribosomal RNA methyltransferase	lincosamide antibiotic;macrolide antibiotic;streptogramin antibiotic	antibiotic target alteration	1	ErmQ	Clostridium perfringens
ACS83559.1	lincosamide nucleotidyltransferase (LNU)	lincosamide antibiotic	antibiotic inactivation	1	LnuP	Clostridium perfringens
ABG86067.1	defensin resistant mprF	peptide antibiotic	antibiotic target alteration	3	Clostridium perfringens mprF	Clostridium perfringens SM101
ACN32294.1	ATP-binding cassette (ABC) antibiotic efflux pump	aminocoumarin antibiotic;aminoglycoside antibiotic;carbapenem;cephalosporin;cephamycin;fluoroquinolone antibiotic;glycylcycline;macrolide antibiotic;penam;penem;peptide antibiotic;phenicol antibiotic;rifamycin antibiotic;tetracycline antibiotic;triclosan	antibiotic efflux	1	tolC	Escherichia coli
BAA11236.1	major facilitator superfamily (MFS) antibiotic efflux pump	tetracycline antibiotic	antibiotic efflux	2	emrK	Escherichia coli
BAJ42218.1	ampC-type beta-lactamase	cephalosporin;penam	antibiotic inactivation	1	Escherichia coli ampH	Escherichia coli DH1
CBJ02047.1	ampC-type beta-lactamase	cephalosporin;penam	antibiotic inactivation	1	Escherichia coli ampC1 beta-lactamase	Escherichia coli ETEC H10407
BAB35162.1	major facilitator superfamily (MFS) antibiotic efflux pump	cephalosporin;cephamycin;fluoroquinolone antibiotic;macrolide antibiotic;penam;tetracycline antibiotic	antibiotic efflux	1	H-NS	Escherichia coli O157:H7 str. Sakai
BAB38260.1	resistance-nodulation-cell division (RND) antibiotic efflux pump	aminocoumarin antibiotic;aminoglycoside antibiotic	antibiotic efflux	2	cpxA	Escherichia coli O157:H7 str. Sakai
ANK04027.1	resistance-nodulation-cell division (RND) antibiotic efflux pump	fluoroquinolone antibiotic;macrolide antibiotic;penam	antibiotic efflux	1	gadW	Escherichia coli O25b:H4
AAC73564.1	resistance-nodulation-cell division (RND) antibiotic efflux pump	cephalosporin;fluoroquinolone antibiotic;glycylcycline;penam;phenicol antibiotic;rifamycin antibiotic;tetracycline antibiotic;triclosan	antibiotic efflux	2	acrB	Escherichia coli str. K-12 substr. MG1655
AAC73565.1	resistance-nodulation-cell division (RND) antibiotic efflux pump	cephalosporin;fluoroquinolone antibiotic;glycylcycline;penam;phenicol antibiotic;rifamycin antibiotic;tetracycline antibiotic;triclosan	antibiotic efflux	1	Escherichia coli acrA	Escherichia coli str. K-12 substr. MG1655
AAC74000.1	ATP-binding cassette (ABC) antibiotic efflux pump	nitroimidazole antibiotic	antibiotic efflux	2	msbA	Escherichia coli str. K-12 substr. MG1655
AAC75137.1	resistance-nodulation-cell division (RND) antibiotic efflux pump	aminocoumarin antibiotic	antibiotic efflux	2	mdtC	Escherichia coli str. K-12 substr. MG1655
AAC75429.1	major facilitator superfamily (MFS) antibiotic efflux pump	fluoroquinolone antibiotic;macrolide antibiotic;penam;tetracycline antibiotic	antibiotic efflux	3	evgS	Escherichia coli str. K-12 substr. MG1655
AAC75733.1	major facilitator superfamily (MFS) antibiotic efflux pump	fluoroquinolone antibiotic	antibiotic efflux	1	emrB	Escherichia coli str. K-12 substr. MG1655
AAC76297.1	resistance-nodulation-cell division (RND) antibiotic efflux pump	cephalosporin;cephamycin;fluoroquinolone antibiotic;penam	antibiotic efflux	1	acrE	Escherichia coli str. K-12 substr. MG1655
AAC76298.1	resistance-nodulation-cell division (RND) antibiotic efflux pump	cephalosporin;cephamycin;fluoroquinolone antibiotic;penam	antibiotic efflux	2	acrF	Escherichia coli str. K-12 substr. MG1655
AAC76539.1	resistance-nodulation-cell division (RND) antibiotic efflux pump	fluoroquinolone antibiotic;macrolide antibiotic;penam	antibiotic efflux	2	mdtF	Escherichia coli str. K-12 substr. MG1655
AAC77110.1	ampC-type beta-lactamase	cephalosporin;penam	antibiotic inactivation	1	Escherichia coli ampC	Escherichia coli str. K-12 substr. MG1655
BAA15934.1	resistance-nodulation-cell division (RND) antibiotic efflux pump	aminocoumarin antibiotic;aminoglycoside antibiotic	antibiotic efflux	1	baeS	Escherichia coli str. K-12 substr. W3110
BAA15935.1	resistance-nodulation-cell division (RND) antibiotic efflux pump	aminocoumarin antibiotic;aminoglycoside antibiotic	antibiotic efflux	1	baeR	Escherichia coli str. K-12 substr. W3110
BAE77778.1	resistance-nodulation-cell division (RND) antibiotic efflux pump	fluoroquinolone antibiotic;macrolide antibiotic;penam	antibiotic efflux	1	gadX	Escherichia coli str. K-12 substr. W3110
BAE77781.1	resistance-nodulation-cell division (RND) antibiotic efflux pump	fluoroquinolone antibiotic;macrolide antibiotic;penam	antibiotic efflux	2	mdtE	Escherichia coli str. K-12 substr. W3110
BAE77933.1	resistance-nodulation-cell division (RND) antibiotic efflux pump	fluoroquinolone antibiotic;macrolide antibiotic;penam	antibiotic efflux	6	CRP	Escherichia coli str. K-12 substr. W3110
BAE78082.1	major facilitator superfamily (MFS) antibiotic efflux pump	acridine dye;nucleoside antibiotic	antibiotic efflux	2	mdtP	Escherichia coli str. K-12 substr. W3110
BAE78083.1	major facilitator superfamily (MFS) antibiotic efflux pump	acridine dye;nucleoside antibiotic	antibiotic efflux	1	mdtO	Escherichia coli str. K-12 substr. W3110
BAE78084.1	major facilitator superfamily (MFS) antibiotic efflux pump	acridine dye;nucleoside antibiotic	antibiotic efflux	1	mdtN	Escherichia coli str. K-12 substr. W3110
AAP69916.1	OXA beta-lactamase	cephalosporin;penam	antibiotic inactivation	1	OXA-85	Fusobacterium nucleatum
AAA22851.1	major facilitator superfamily (MFS) antibiotic efflux pump	tetracycline antibiotic	antibiotic efflux	3	tet(L)	Geobacillus stearothermophilus
BAC67143.1	major facilitator superfamily (MFS) antibiotic efflux pump	tetracycline antibiotic	antibiotic efflux	2	tet(B)	Gram-negative bacterium TC71
CCP46065.1	resistance-nodulation-cell division (RND) antibiotic efflux pump	macrolide antibiotic;penam	antibiotic efflux	2	mtrA	Mycobacterium tuberculosis H37Rv
BAD59497.1	rifamycin-resistant beta-subunit of RNA polymerase (rpoB)	rifamycin antibiotic	antibiotic target alteration;antibiotic target replacement	1	Nocardia rifampin resistant beta-subunit of RNA polymerase (rpoB2)	Nocardia farcinica IFM 10152
AAN06707.1	major facilitator superfamily (MFS) antibiotic efflux pump	tetracycline antibiotic	antibiotic efflux	2	tet(A)	Shigella sonnei
AAA26652.1	lincosamide nucleotidyltransferase (LNU)	lincosamide antibiotic	antibiotic inactivation	2	lnuA	Staphylococcus haemolyticus
AAY32951.1	lincosamide nucleotidyltransferase (LNU)	lincosamide antibiotic	antibiotic inactivation	1	lnuC	Streptococcus agalactiae
AAC60780.1	major facilitator superfamily (MFS) antibiotic efflux pump	peptide antibiotic	antibiotic efflux	1	rosB	Yersinia enterocolitica (type O:8)
