# Supplementary material for: First metagenomic analysis of the Andean condor (Vultur gryphus) gut microbiome reveals microbial diversity and wide resistome
Source: PeerJ. 2023 Jul 7;11:e15235. doi: 10.7717/peerj.15235 (PMC10332357; doi:10.7717/peerj.15235)
Supplement: Supplemental Information 5 [file peerj-11-15235-s005.xlsx]

## Sheet: contigs_cp_annotation
gene_id	seed_eggNOG_ortholog	seed_ortholog_evalue	seed_ortholog_score	best_tax_level	Preferred_name	GOs	EC	KEGG_ko	KEGG_Pathway	KEGG_Module	KEGG_Reaction	KEGG_rclass	BRITE	KEGG_TC	CAZy	BiGG_Reaction	Tax.scope	eggNOG.Ogs	Best.Ogs	COGs	eggNOG.HMM.Description	Analysis	AnAccess	Description	InterPro_ann	Interpro_description	GO	Pathways
NC_008261.1_0_1	195103.CPF_0001	7.3e-245	852.8	Clostridiaceae	dnaA	GO:0003674,GO:0003676,GO:0003677,GO:0003688,GO:0003690,GO:0005488,GO:0005515,GO:0005575,GO:0005622,GO:0005623,GO:0005737,GO:0005886,GO:0006139,GO:0006259,GO:0006260,GO:0006261,GO:0006270,GO:0006725,GO:0006807,GO:0008150,GO:0008152,GO:0009058,GO:0009059,GO:0009987,GO:0016020,GO:0034641,GO:0034645,GO:0042802,GO:0043170,GO:0043565,GO:0044237,GO:0044238,GO:0044249,GO:0044260,GO:0044424,GO:0044464,GO:…		ko:K02313	ko02020,ko04112,map02020,map04112				ko00000,ko00001,ko03032,ko03036				Bacteria	1TPV7@1239,2490S@186801,36DSQ@31979,COG0593@1,COG0593@2	NA|NA|NA	L	it binds specifically double-stranded DNA at a 9 bp consensus (dnaA box) 5-TTATC CA A CA A-3. DnaA binds to ATP and to acidic phospholipids	Pfam, Gene3D, SMART, PANTHER, Pfam, PRINTS, PRINTS, PRINTS, PRINTS, PRINTS, Gene3D, TIGRFAM, SUPERFAMILY, Pfam, Gene3D, Coils, SUPERFAMILY, ProSitePatterns, PANTHER, Hamap, Gene3D, CDD, SMART, CDD	PF00308, G3DSA:3.40.50.300, SM00382, PTHR30050:SF2, PF08299, PR00051, PR00051, PR00051, PR00051, PR00051, G3DSA:1.10.1750.10, TIGR00362, SSF52540, PF11638, G3DSA:3.30.300.180, Coil, SSF48295, PS01008, PTHR30050, MF_00377, G3DSA:1.10.8.60, cd00009, SM00760, cd06571	Bacterial dnaA protein, Bacterial dnaA protein helix-turn-helix, Bacterial chromosomal replication initiator (DNAA) signature, Bacterial chromosomal replication initiator (DNAA) signature, Bacterial chromosomal replication initiator (DNAA) signature, Bacterial chromosomal replication initiator (DNAA) signature, Bacterial chromosomal replication initiator (DNAA) signature, DnaA: chromosomal replic…	IPR013317, IPR003593, IPR001957, IPR013159, IPR020591, IPR020591, IPR020591, IPR020591, IPR020591, IPR010921, IPR001957, IPR027417, IPR024633, IPR038454, IPR010921, IPR018312, IPR001957, IPR013159, IPR013159	Chromosomal replication initiator protein DnaA, AAA+ ATPase domain, Chromosomal replication control, initiator DnaA, Chromosomal replication initiator, DnaA C-terminal, Chromosomal replication control, initiator DnaA-like, Chromosomal replication control, initiator DnaA-like, Chromosomal replication control, initiator DnaA-like, Chromosomal replication control, initiator DnaA-like, Chromosomal re…	GO:0003677, GO:0003688, GO:0005524, GO:0006270, GO:0006275, GO:0005524, GO:0006270, GO:0006275, GO:0043565, GO:0043565, GO:0003677, GO:0003688, GO:0005524, GO:0006270, GO:0006275, GO:0043565, GO:0003677, GO:0003688, GO:0005524, GO:0006270, GO:0006275, GO:0003677, GO:0003688, GO:0005524, GO:0006270, GO:0006275, GO:0005524, GO:0006270, GO:0006275, GO:0043565, GO:0005524, GO:0006270, GO:0006275, GO:…
NC_008261.1_0_10	195103.CPF_0012	6e-263	912.9	Clostridiaceae			1.1.5.3,1.7.1.15	ko:K00111,ko:K00362	ko00564,ko00910,ko01110,ko01120,map00564,map00910,map01110,map01120	M00530	R00787,R00848	RC00029,RC00176	ko00000,ko00001,ko00002,ko01000				Bacteria	1UZX7@1239,25EC5@186801,36UK2@31979,COG0579@1,COG0579@2,COG1251@1,COG1251@2	NA|NA|NA	C	FAD dependent oxidoreductase	Gene3D, PANTHER, SUPERFAMILY, Gene3D, Pfam, Pfam, Gene3D	G3DSA:3.50.50.60, PTHR42720, SSF51905, G3DSA:3.30.9.10, PF01266, PF04324, G3DSA:1.10.10.1100	FAD dependent oxidoreductase, BFD-like [2Fe-2S] binding domain	IPR036188, IPR036188, IPR006076, IPR007419	FAD/NAD(P)-binding domain superfamily, FAD/NAD(P)-binding domain superfamily, FAD dependent oxidoreductase, BFD-like [2Fe-2S]-binding domain	GO:0016491, GO:0055114
NC_008261.1_0_100	NA	NA	NA	NA	NA	NA	NA	NA	NA	NA	NA	NA	NA	NA	NA	NA	NA	NA	NA	NA	NA	Pfam	PF07872	Protein of unknown function (DUF1659)	IPR012454	Protein of unknown function DUF1659
NC_008261.1_0_101	1391647.AVSV01000029_gene1922	2.7e-08	64.3	Firmicutes													Bacteria	1VKCM@1239,2DR42@1,33A2M@2	NA|NA|NA	S	Protein of unknown function (DUF2922)	Pfam	PF11148	Protein of unknown function (DUF2922)	IPR021321	Protein of unknown function DUF2922
NC_008261.1_0_102	195103.CPF_0111	2.4e-146	525	Clostridiaceae			3.5.1.28	ko:K01448	ko01503,map01503	M00727	R04112	RC00064,RC00141	ko00000,ko00001,ko00002,ko01000,ko01011,ko03036				Bacteria	1UY5Q@1239,247Y6@186801,36HS7@31979,COG0860@1,COG0860@2	NA|NA|NA	M	N-acetylmuramoyl-L-alanine amidase	ProSiteProfiles, Gene3D, CDD, Pfam, MobiDBLite, MobiDBLite, SMART, MobiDBLite, Coils, PANTHER, PANTHER, SUPERFAMILY	PS51257, G3DSA:3.40.630.40, cd02696, PF01520, mobidb-lite, mobidb-lite, SM00646, mobidb-lite, Coil, PTHR30404, PTHR30404:SF3, SSF53187	Prokaryotic membrane lipoprotein lipid attachment site profile., MurNAc-LAA, N-acetylmuramoyl-L-alanine amidase, consensus disorder prediction, consensus disorder prediction, consensus disorder prediction	IPR002508, IPR002508, IPR002508	N-acetylmuramoyl-L-alanine amidase, catalytic domain, N-acetylmuramoyl-L-alanine amidase, catalytic domain, N-acetylmuramoyl-L-alanine amidase, catalytic domain	GO:0008745, GO:0009253, GO:0008745, GO:0009253, GO:0008745, GO:0009253
NC_008261.1_0_103	195103.CPF_0112	3.9e-191	674.1	Clostridiaceae				ko:K07003					ko00000				Bacteria	1VHSF@1239,24R7H@186801,36UR5@31979,COG1033@1,COG1033@2	NA|NA|NA	S	YARHG	Pfam, MobiDBLite, Pfam, Gene3D, PANTHER, PANTHER, SMART	PF13240, mobidb-lite, PF13308, G3DSA:1.20.58.1690, PTHR40038, PTHR40038, SM01324	zinc-ribbon domain, consensus disorder prediction, YARHG domain	IPR026870, IPR025582, IPR038434, IPR025582	Zinc-ribbon domain, YARHG domain, YARHG domain superfamily, YARHG domain		Reactome: R-HSA-202670
NC_008261.1_0_104	195103.CPF_0113	8.7e-229	799.3	Clostridiaceae	tcaA			ko:K21463					ko00000				Bacteria	1VEDD@1239,24CJK@186801,36GD8@31979,COG4640@1,COG4640@2	NA|NA|NA	S	response to antibiotic	PANTHER	PTHR40038
NC_008261.1_0_105	195103.CPF_0114	4e-134	484.2	Clostridiaceae													Bacteria	1VIMB@1239,24U83@186801,36N3E@31979,COG4640@1,COG4640@2	NA|NA|NA	S	zinc-ribbon domain	Pfam	PF13240	zinc-ribbon domain	IPR026870	Zinc-ribbon domain		Reactome: R-HSA-202670
NC_008261.1_0_106	195103.CPF_0115	1.4e-119	435.6	Clostridiaceae													Bacteria	1TR32@1239,249TG@186801,36EMS@31979,COG0745@1,COG0745@2	NA|NA|NA	T	response regulator	SMART, PANTHER, CDD, ProSiteProfiles, CDD, ProSiteProfiles, Pfam, Gene3D, PANTHER, SUPERFAMILY, Gene3D, SMART, Pfam, SUPERFAMILY	SM00862, PTHR26402:SF519, cd00156, PS51755, cd00383, PS50110, PF00486, G3DSA:3.40.50.2300, PTHR26402, SSF46894, G3DSA:1.10.10.10, SM00448, PF00072, SSF52172	REC, OmpR/PhoB-type DNA-binding domain profile., trans_reg_C, Response regulatory domain profile., Transcriptional regulatory protein, C terminal, Response regulator receiver domain	IPR001867, IPR001789, IPR001867, IPR001867, IPR001789, IPR001867, IPR039420, IPR016032, IPR036388, IPR001789, IPR001789, IPR011006	OmpR/PhoB-type DNA-binding domain, Signal transduction response regulator, receiver domain, OmpR/PhoB-type DNA-binding domain, OmpR/PhoB-type DNA-binding domain, Signal transduction response regulator, receiver domain, OmpR/PhoB-type DNA-binding domain, Transcriptional regulatory protein WalR-like, Signal transduction response regulator, C-terminal effector, Winged helix-like DNA-binding domain s…	GO:0000160, GO:0003677, GO:0006355, GO:0000160, GO:0000160, GO:0003677, GO:0006355, GO:0000160, GO:0003677, GO:0006355, GO:0000160, GO:0000160, GO:0003677, GO:0006355, GO:0003677, GO:0006355, GO:0000160, GO:0000160
NC_008261.1_0_107	195103.CPF_0116	2.7e-180	637.9	Clostridiaceae													Bacteria	1TSIC@1239,248W8@186801,36FD9@31979,COG0642@1,COG2205@2	NA|NA|NA	T	PhoQ Sensor	ProSiteProfiles, PRINTS, PRINTS, PRINTS, PRINTS, PANTHER, SUPERFAMILY, SMART, Gene3D, PANTHER, CDD, Pfam	PS50109, PR00344, PR00344, PR00344, PR00344, PTHR42878, SSF55874, SM00387, G3DSA:3.30.565.10, PTHR42878:SF5, cd00075, PF02518	Histidine kinase domain profile., Bacterial sensor protein C-terminal signature, Bacterial sensor protein C-terminal signature, Bacterial sensor protein C-terminal signature, Bacterial sensor protein C-terminal signature, HATPase_c, Histidine kinase-, DNA gyrase B-, and HSP90-like ATPase	IPR005467, IPR004358, IPR004358, IPR004358, IPR004358, IPR036890, IPR003594, IPR036890, IPR003594, IPR003594	Histidine kinase domain, Signal transduction histidine kinase-related protein, C-terminal, Signal transduction histidine kinase-related protein, C-terminal, Signal transduction histidine kinase-related protein, C-terminal, Signal transduction histidine kinase-related protein, C-terminal, Histidine kinase/HSP90-like ATPase superfamily, Histidine kinase/HSP90-like ATPase, Histidine kinase/HSP90-lik…	GO:0016310, GO:0016772, GO:0016310, GO:0016772, GO:0016310, GO:0016772, GO:0016310, GO:0016772	Reactome: R-HSA-204174|Reactome: R-HSA-5362517, Reactome: R-HSA-70895, Reactome: R-HSA-70895, Reactome: R-HSA-70895, Reactome: R-HSA-70895
NC_008261.1_0_109	195103.CPF_0118	3.8e-134	484.2	Clostridiaceae				ko:K02003		M00258			ko00000,ko00002,ko02000	3.A.1			Bacteria	1TNZG@1239,247JX@186801,36DTD@31979,COG1136@1,COG1136@2	NA|NA|NA	V	ABC transporter	Pfam, CDD, SMART, Gene3D, ProSiteProfiles, PANTHER, PANTHER, SUPERFAMILY	PF00005, cd03255, SM00382, G3DSA:3.40.50.300, PS50893, PTHR24220:SF594, PTHR24220, SSF52540	ABC transporter, ABC_MJ0796_LolCDE_FtsE, ATP-binding cassette, ABC transporter-type domain profile.	IPR003439, IPR003593, IPR003439, IPR027417	ABC transporter-like, AAA+ ATPase domain, ABC transporter-like, P-loop containing nucleoside triphosphate hydrolase	GO:0005524, GO:0016887, GO:0005524, GO:0016887
NC_008261.1_0_11	195103.CPF_0013	6.5e-37	159.5	Clostridiaceae													Bacteria	1VK1F@1239,24QS5@186801,36MQX@31979,COG3862@1,COG3862@2	NA|NA|NA	S	Protein of unknown function (DUF1667)	Gene3D, PANTHER, Pfam, SUPERFAMILY	G3DSA:3.10.530.10, PTHR39450, PF07892, SSF160148	Protein of unknown function (DUF1667)	IPR036593, IPR012460, IPR012460, IPR036593	CPE0013-like superfamily, Protein of unknown function DUF1667, Protein of unknown function DUF1667, CPE0013-like superfamily
NC_008261.1_0_110	195103.CPF_0119	0	1191	Clostridiaceae				ko:K02004		M00258			ko00000,ko00002,ko02000	3.A.1			Bacteria	1TR2D@1239,2481J@186801,36EQ4@31979,COG0577@1,COG0577@2	NA|NA|NA	V	ABC transporter permease	PANTHER, PANTHER, PIRSF, Pfam	PTHR30489:SF14, PTHR30489, PIRSF018968, PF02687	FtsX-like permease family	IPR027022, IPR003838	ABC transporter permease protein, BceB-type, ABC transporter permease protein domain	GO:0055085, GO:0016020
NC_008261.1_0_112	926551.KB900706_gene1656	2.6e-08	64.3	Bacteria													Bacteria	2EGIH@1,33AAN@2	NA|NA|NA			Gene3D, SUPERFAMILY, Pfam	G3DSA:1.10.1200.20, SSF47345, PF01320	Colicin immunity protein / pyocin immunity protein	IPR035900, IPR035900, IPR000290	Colicin E immunity protein superfamily, Colicin E immunity protein superfamily, Colicin immunity protein/pyocin immunity protein	GO:0015643, GO:0030153
NC_008261.1_0_12	195103.CPF_0014	1.7e-208	731.9	Clostridiaceae	serS	GO:0000287,GO:0003674,GO:0003824,GO:0004812,GO:0004828,GO:0005488,GO:0005515,GO:0005575,GO:0005622,GO:0005623,GO:0005737,GO:0005829,GO:0006082,GO:0006139,GO:0006399,GO:0006412,GO:0006418,GO:0006434,GO:0006518,GO:0006520,GO:0006725,GO:0006807,GO:0008150,GO:0008152,GO:0008652,GO:0009058,GO:0009059,GO:0009069,GO:0009070,GO:0009987,GO:0010467,GO:0016053,GO:0016070,GO:0016259,GO:0016260,GO:0016874,GO:…	6.1.1.11	ko:K01875	ko00970,map00970	M00359,M00360	R03662,R08218	RC00055,RC00523	ko00000,ko00001,ko00002,ko01000,ko01007,ko03016			iAF987.Gmet_3528,iSDY_1059.SDY_2368	Bacteria	1TP4W@1239,2485M@186801,36DP4@31979,COG0172@1,COG0172@2	NA|NA|NA	J	Catalyzes the attachment of serine to tRNA(Ser). Is also able to aminoacylate tRNA(Sec) with serine, to form the misacylated tRNA L-seryl-tRNA(Sec), which will be further converted into selenocysteinyl-tRNA(Sec)	ProSiteProfiles, PIRSF, Hamap, Pfam, PRINTS, PRINTS, PRINTS, PRINTS, PRINTS, Pfam, Gene3D, SUPERFAMILY, TIGRFAM, SUPERFAMILY, PANTHER, CDD, Gene3D	PS50862, PIRSF001529, MF_00176, PF02403, PR00981, PR00981, PR00981, PR00981, PR00981, PF00587, G3DSA:1.10.287.40, SSF46589, TIGR00414, SSF55681, PTHR43697, cd00770, G3DSA:3.30.930.10	Aminoacyl-transfer RNA synthetases class-II family profile., Serine--tRNA ligase [serS]., Seryl-tRNA synthetase N-terminal domain, Seryl-tRNA synthetase signature, Seryl-tRNA synthetase signature, Seryl-tRNA synthetase signature, Seryl-tRNA synthetase signature, Seryl-tRNA synthetase signature, tRNA synthetase class II core domain (G, H, P, S and T), serS: serine--tRNA ligase, SerRS_core	IPR006195, IPR002317, IPR002317, IPR015866, IPR002317, IPR002317, IPR002317, IPR002317, IPR002317, IPR002314, IPR010978, IPR002317, IPR002317, IPR033729	Aminoacyl-tRNA synthetase, class II, Serine-tRNA ligase, type1, Serine-tRNA ligase, type1, Serine-tRNA synthetase, type1, N-terminal, Serine-tRNA ligase, type1, Serine-tRNA ligase, type1, Serine-tRNA ligase, type1, Serine-tRNA ligase, type1, Serine-tRNA ligase, type1, Aminoacyl-tRNA synthetase, class II (G/ P/ S/T), Class I and II aminoacyl-tRNA synthetase, tRNA-binding arm, Serine-tRNA ligase, t…	GO:0000166, GO:0004828, GO:0005524, GO:0005737, GO:0006434, GO:0000166, GO:0004828, GO:0005524, GO:0005737, GO:0006434, GO:0000166, GO:0004828, GO:0005524, GO:0005737, GO:0006434, GO:0000166, GO:0004828, GO:0005524, GO:0005737, GO:0006434, GO:0000166, GO:0004828, GO:0005524, GO:0005737, GO:0006434, GO:0000166, GO:0004828, GO:0005524, GO:0005737, GO:0006434, GO:0000166, GO:0004828, GO:0005524, GO:…	KEGG: 00970+6.1.1.11|MetaCyc: PWY-6281, KEGG: 00970+6.1.1.11|MetaCyc: PWY-6281, KEGG: 00970+6.1.1.11|MetaCyc: PWY-6281|Reactome: R-HSA-2408557|Reactome: R-HSA-379716, KEGG: 00970+6.1.1.11|MetaCyc: PWY-6281, KEGG: 00970+6.1.1.11|MetaCyc: PWY-6281, KEGG: 00970+6.1.1.11|MetaCyc: PWY-6281, KEGG: 00970+6.1.1.11|MetaCyc: PWY-6281, KEGG: 00970+6.1.1.11|MetaCyc: PWY-6281, KEGG: 00970+6.1.1.11|MetaCyc: PW…
NC_008261.1_0_13	NA	NA	NA	NA	NA	NA	NA	NA	NA	NA	NA	NA	NA	NA	NA	NA	NA	NA	NA	NA	NA	Coils	Coil
NC_008261.1_0_16	195103.CPF_0022	8.1e-165	586.3	Clostridiaceae													Bacteria	1TT6N@1239,24A8X@186801,36ER0@31979,COG2908@1,COG2908@2	NA|NA|NA	S	Calcineurin-like phosphoesterase superfamily domain	Pfam, SUPERFAMILY	PF12850, SSF56300	Calcineurin-like phosphoesterase superfamily domain	IPR024654	Calcineurin-like phosphoesterase domain, lpxH type		Reactome: R-HSA-3238698
NC_008261.1_0_17	NA	NA	NA	NA	NA	NA	NA	NA	NA	NA	NA	NA	NA	NA	NA	NA	NA	NA	NA	NA	NA	MobiDBLite, Coils	mobidb-lite, Coil	consensus disorder prediction
NC_008261.1_0_18	195103.CPF_0024	0	2254.9	Clostridiaceae	addB	GO:0003674,GO:0003678,GO:0003824,GO:0004003,GO:0004386,GO:0004518,GO:0004519,GO:0004527,GO:0006139,GO:0006259,GO:0006281,GO:0006302,GO:0006310,GO:0006725,GO:0006807,GO:0006950,GO:0006974,GO:0006996,GO:0008026,GO:0008094,GO:0008150,GO:0008152,GO:0009987,GO:0016043,GO:0016462,GO:0016787,GO:0016788,GO:0016817,GO:0016818,GO:0016887,GO:0017111,GO:0032392,GO:0032508,GO:0033554,GO:0034641,GO:0042623,GO:…	3.1.21.3,3.6.4.12	ko:K01153,ko:K16899					ko00000,ko01000,ko02048,ko03400				Bacteria	1TQJW@1239,2487T@186801,36EE8@31979,COG3857@1,COG3857@2	NA|NA|NA	L	The heterodimer acts as both an ATP-dependent DNA helicase and an ATP-dependent, dual-direction single-stranded exonuclease. Recognizes the chi site generating a DNA molecule suitable for the initiation of homologous recombination. The AddB nuclease domain is not required for chi fragment generation	SUPERFAMILY, TIGRFAM, Pfam, Gene3D, PANTHER, Gene3D, Gene3D, SUPERFAMILY, Hamap, SUPERFAMILY, Pfam	SSF52540, TIGR02773, PF12705, G3DSA:3.40.50.300, PTHR30591, G3DSA:3.40.50.300, G3DSA:3.40.50.300, SSF52540, MF_01452, SSF52980, PF04257	addB_Gpos: helicase-exonuclease AddAB, AddB subunit, PD-(D/E)XK nuclease superfamily, ATP-dependent helicase/deoxyribonuclease subunit B [addB]., Exodeoxyribonuclease V, gamma subunit	IPR027417, IPR014140, IPR038726, IPR027417, IPR014140, IPR011335	P-loop containing nucleoside triphosphate hydrolase, DNA helicase subunit AddB, PD-(D/E)XK endonuclease-like domain, AddAB-type, P-loop containing nucleoside triphosphate hydrolase, DNA helicase subunit AddB, Restriction endonuclease type II-like	GO:0000724, GO:0016788, GO:0000724, GO:0016788	Reactome: R-HSA-6783310
NC_008261.1_0_19	195103.CPF_0025	0	2446.4	Clostridiaceae	addA		3.6.4.12	ko:K16898					ko00000,ko01000,ko03400				Bacteria	1TQ35@1239,248ZF@186801,36E2W@31979,COG1074@1,COG1074@2	NA|NA|NA	L	ATP-dependent helicase nuclease subunit A	PANTHER, ProSiteProfiles, TIGRFAM, Pfam, SUPERFAMILY, Coils, Pfam, Hamap, Pfam, ProSiteProfiles, PANTHER, SUPERFAMILY, Gene3D, Gene3D, Gene3D, Gene3D, Gene3D	PTHR11070, PS51198, TIGR02785, PF00580, SSF52540, Coil, PF13361, MF_01451, PF12705, PS51217, PTHR11070:SF14, SSF52980, G3DSA:3.90.320.10, G3DSA:3.40.50.300, G3DSA:3.40.50.300, G3DSA:3.40.50.300, G3DSA:3.40.50.300	UvrD-like DNA helicase ATP-binding domain profile., addA_Gpos: helicase-exonuclease AddAB, AddA subunit, UvrD/REP helicase N-terminal domain, UvrD-like helicase C-terminal domain, ATP-dependent helicase/nuclease subunit A [addA]., PD-(D/E)XK nuclease superfamily, UvrD-like DNA helicase C-terminal domain profile.	IPR000212, IPR014016, IPR014152, IPR034739, IPR027417, IPR014017, IPR014152, IPR038726, IPR014017, IPR014152, IPR011335, IPR011604	DNA helicase, UvrD/REP type, UvrD-like helicase, ATP-binding domain, DNA helicase subunit AddA, UvrD/AddA helicase, N-terminal, P-loop containing nucleoside triphosphate hydrolase, UvrD-like DNA helicase, C-terminal, DNA helicase subunit AddA, PD-(D/E)XK endonuclease-like domain, AddAB-type, UvrD-like DNA helicase, C-terminal, DNA helicase subunit AddA, Restriction endonuclease type II-like, Exon…	GO:0003677, GO:0004003, GO:0005524, GO:0005524, GO:0004003, GO:0006302, GO:0005524, GO:0005524, GO:0016787, GO:0004003, GO:0006302, GO:0005524, GO:0016787, GO:0004003, GO:0006302	Reactome: R-HSA-6783310
NC_008261.1_0_2	195103.CPF_0002	3.1e-198	697.6	Clostridiaceae	dnaN		2.7.7.7	ko:K02338	ko00230,ko00240,ko01100,ko03030,ko03430,ko03440,map00230,map00240,map01100,map03030,map03430,map03440	M00260	R00375,R00376,R00377,R00378	RC02795	ko00000,ko00001,ko00002,ko01000,ko03032,ko03400				Bacteria	1TQ7J@1239,248EG@186801,36E0C@31979,COG0592@1,COG0592@2	NA|NA|NA	L	Confers DNA tethering and processivity to DNA polymerases and other proteins. Acts as a clamp, forming a ring around DNA (a reaction catalyzed by the clamp-loading complex) which diffuses in an ATP-independent manner freely and bidirectionally along dsDNA. Initially characterized for its ability to contact the catalytic subunit of DNA polymerase III (Pol III), a complex, multichain enzyme respons…	Pfam, SUPERFAMILY, Pfam, SMART, SUPERFAMILY, CDD, PANTHER, Gene3D, PIRSF, Pfam, SUPERFAMILY, Gene3D, TIGRFAM	PF02767, SSF55979, PF02768, SM00480, SSF55979, cd00140, PTHR30478, G3DSA:3.10.150.10, PIRSF000804, PF00712, SSF55979, G3DSA:3.70.10.10, TIGR00663	DNA polymerase III beta subunit, central domain, DNA polymerase III beta subunit, C-terminal domain, beta_clamp, DNA polymerase III beta subunit, N-terminal domain, dnan: DNA polymerase III, beta subunit	IPR022637, IPR022635, IPR001001, IPR001001, IPR001001, IPR001001, IPR022634, IPR001001	DNA polymerase III, beta sliding clamp, central, DNA polymerase III, beta sliding clamp, C-terminal, DNA polymerase III, beta sliding clamp, DNA polymerase III, beta sliding clamp, DNA polymerase III, beta sliding clamp, DNA polymerase III, beta sliding clamp, DNA polymerase III, beta sliding clamp, N-terminal, DNA polymerase III, beta sliding clamp	GO:0003887, GO:0006260, GO:0008408, GO:0009360, GO:0003677, GO:0003887, GO:0006260, GO:0008408, GO:0009360, GO:0003677, GO:0006260, GO:0009360, GO:0003677, GO:0006260, GO:0009360, GO:0003677, GO:0006260, GO:0009360, GO:0003677, GO:0006260, GO:0009360, GO:0003677, GO:0003887, GO:0006260, GO:0008408, GO:0009360, GO:0003677, GO:0006260, GO:0009360
NC_008261.1_0_20	195103.CPF_0026	1.2e-238	832	Clostridiaceae	cca		2.7.7.72	ko:K00974	ko03013,map03013		R09382,R09383,R09384,R09386	RC00078	ko00000,ko00001,ko01000,ko03016				Bacteria	1TQ2A@1239,247XC@186801,36FRJ@31979,COG0617@1,COG0617@2	NA|NA|NA	J	tRNA nucleotidyltransferase poly(A) polymerase	Pfam, Pfam, PANTHER, Pfam, CDD, Gene3D, SUPERFAMILY, PANTHER, SUPERFAMILY, Gene3D	PF12627, PF13735, PTHR13734, PF01743, cd05398, G3DSA:1.10.3090.10, SSF81891, PTHR13734:SF5, SSF81301, G3DSA:3.30.460.10	Probable RNA and SrmB- binding site of polymerase A, tRNA nucleotidyltransferase domain 2 putative, Poly A polymerase head domain, NT_ClassII-CCAase	IPR032828, IPR032810, IPR002646, IPR002646	tRNA nucleotidyltransferase/poly(A) polymerase, RNA and SrmB- binding domain, CCA-adding enzyme, C-terminal, Poly A polymerase, head domain, Poly A polymerase, head domain	GO:0003723, GO:0006396, GO:0016779, GO:0003723, GO:0006396, GO:0016779	Reactome: R-HSA-6784531|Reactome: R-HSA-6785470, Reactome: R-HSA-6784531|Reactome: R-HSA-6785470, Reactome: R-HSA-6784531|Reactome: R-HSA-6785470
NC_008261.1_0_21	195103.CPF_0027	8.2e-182	642.9	Clostridiaceae	cbf			ko:K03698					ko00000,ko01000,ko03019				Bacteria	1TPIU@1239,248SS@186801,36FR2@31979,COG3481@1,COG3481@2	NA|NA|NA	S	domain protein	Gene3D, SUPERFAMILY, Pfam, Gene3D, Pfam, SUPERFAMILY, PANTHER, CDD, CDD	G3DSA:2.40.50.140, SSF109604, PF01966, G3DSA:1.10.3210.10, PF01336, SSF50249, PTHR37294, cd04492, cd00077	HD domain, OB-fold nucleic acid binding domain, YhaM_OBF_like, HDc	IPR006674, IPR004365, IPR012340, IPR003607	HD domain, OB-fold nucleic acid binding domain, AA-tRNA synthetase-type, Nucleic acid-binding, OB-fold, HD/PDEase domain	GO:0003676
NC_008261.1_0_22	195103.CPF_0028	3.6e-213	747.3	Clostridiaceae													Bacteria	1V9CP@1239,25B2P@186801,36EB4@31979,COG1376@1,COG1376@2	NA|NA|NA	S	L,D-transpeptidase catalytic domain	PANTHER, Gene3D, SUPERFAMILY, Pfam	PTHR30582, G3DSA:2.40.440.10, SSF141523, PF03734	L,D-transpeptidase catalytic domain	IPR038063, IPR038063, IPR005490	L,D-transpeptidase catalytic domain-like, L,D-transpeptidase catalytic domain-like, L,D-transpeptidase catalytic domain	GO:0016740
NC_008261.1_0_23	195103.CPF_0029	1e-229	802.4	Clostridiaceae	pepT		3.4.11.4	ko:K01258					ko00000,ko01000,ko01002				Bacteria	1TP3A@1239,248JJ@186801,36EEA@31979,COG2195@1,COG2195@2	NA|NA|NA	E	Cleaves the N-terminal amino acid of tripeptides	PANTHER, Pfam, ProSitePatterns, Gene3D, SUPERFAMILY, ProSitePatterns, Hamap, PANTHER, SUPERFAMILY, TIGRFAM, Pfam, PIRSF, CDD, Coils, Gene3D	PTHR42994:SF1, PF07687, PS00758, G3DSA:3.30.70.360, SSF53187, PS00759, MF_00550, PTHR42994, SSF55031, TIGR01882, PF01546, PIRSF037215, cd03892, Coil, G3DSA:3.40.630.10	Peptidase dimerisation domain, ArgE / dapE / ACY1 / CPG2 / yscS family signature 1., ArgE / dapE / ACY1 / CPG2 / yscS family signature 2., Peptidase T [pepT]., peptidase-T: peptidase T, Peptidase family M20/M25/M40, M20_peptT	IPR010161, IPR011650, IPR001261, IPR001261, IPR010161, IPR036264, IPR010161, IPR002933, IPR010161, IPR010161	Peptidase M20B, tripeptide aminopeptidase, Peptidase M20, dimerisation domain, ArgE/DapE/ACY1/CPG2/YscS, conserved site, ArgE/DapE/ACY1/CPG2/YscS, conserved site, Peptidase M20B, tripeptide aminopeptidase, Bacterial exopeptidase dimerisation domain, Peptidase M20B, tripeptide aminopeptidase, Peptidase M20, Peptidase M20B, tripeptide aminopeptidase, Peptidase M20B, tripeptide aminopeptidase	GO:0005737, GO:0006518, GO:0008270, GO:0045148, GO:0006508, GO:0008237, GO:0006508, GO:0008237, GO:0005737, GO:0006518, GO:0008270, GO:0045148, GO:0005737, GO:0006518, GO:0008270, GO:0045148, GO:0016787, GO:0005737, GO:0006518, GO:0008270, GO:0045148, GO:0005737, GO:0006518, GO:0008270, GO:0045148
NC_008261.1_0_24	195103.CPF_0030	1.2e-160	572.4	Clostridiaceae	degV												Bacteria	1TQDI@1239,24ADT@186801,36EZJ@31979,COG1307@1,COG1307@2	NA|NA|NA	S	DegV family	PANTHER, SUPERFAMILY, Pfam, Gene3D, ProSiteProfiles, TIGRFAM, Gene3D, PANTHER, Coils, Gene3D	PTHR33434:SF3, SSF82549, PF02645, G3DSA:3.40.50.10440, PS51482, TIGR00762, G3DSA:3.30.1180.10, PTHR33434, Coil, G3DSA:2.20.28.50	Uncharacterised protein, DegV family COG1307, DegV domain profile., DegV: EDD domain protein, DegV family	IPR003797, IPR003797, IPR003797	DegV, DegV, DegV
NC_008261.1_0_25	195103.CPF_0032	1.7e-207	728.4	Clostridiaceae													Bacteria	1VDVK@1239,24990@186801,2BW9D@1,32W1C@2,36FDU@31979	NA|NA|NA	S	Domain of unknown function (DUF1887)	SUPERFAMILY, Gene3D, Pfam	SSF52980, G3DSA:3.40.1350.10, PF09002	Domain of unknown function (DUF1887)	IPR011335, IPR011856, IPR015093	Restriction endonuclease type II-like, tRNA endonuclease-like domain superfamily, Protein of unknown function DUF1887	GO:0003676, GO:0004518	Reactome: R-HSA-6783310
NC_008261.1_0_26	195103.CPF_0033	1.5e-166	592	Clostridiaceae	psd		4.1.1.65	ko:K01613	ko00564,ko01100,ko01110,map00564,map01100,map01110	M00093	R02055	RC00299	ko00000,ko00001,ko00002,ko01000				Bacteria	1TR34@1239,248VU@186801,36FQU@31979,COG0688@1,COG0688@2	NA|NA|NA	I	Catalyzes the formation of phosphatidylethanolamine (PtdEtn) from phosphatidylserine (PtdSer)	TIGRFAM, PANTHER, Pfam, PANTHER, Hamap	TIGR00163, PTHR10067:SF2, PF02666, PTHR10067, MF_00663	PS_decarb: phosphatidylserine decarboxylase, Phosphatidylserine decarboxylase, Phosphatidylserine decarboxylase proenzyme [psd].	IPR033177, IPR003817, IPR003817, IPR033179	Phosphatidylserine decarboxylase, Phosphatidylserine decarboxylase-related, Phosphatidylserine decarboxylase-related, Phosphatidylserine decarboxylase, prokaryotic type 2	GO:0004609, GO:0008654, GO:0004609, GO:0008654, GO:0004609, GO:0008654, GO:0004609, GO:0008654	KEGG: 00564+4.1.1.65|MetaCyc: PWY-5669|Reactome: R-HSA-1483213, KEGG: 00564+4.1.1.65|MetaCyc: PWY-5669|Reactome: R-HSA-1483213, KEGG: 00564+4.1.1.65|MetaCyc: PWY-5669|Reactome: R-HSA-1483213, KEGG: 00564+4.1.1.65|MetaCyc: PWY-5669
NC_008261.1_0_27	195103.CPF_0034	3.8e-99	367.5	Clostridiaceae	ysiA			ko:K09017					ko00000,ko03000				Bacteria	1VFX3@1239,24GN9@186801,36DJI@31979,COG1309@1,COG1309@2	NA|NA|NA	K	transcriptional regulator	SUPERFAMILY, ProSiteProfiles, Pfam, SUPERFAMILY, PRINTS, PRINTS, Gene3D, PANTHER, Gene3D	SSF46689, PS50977, PF00440, SSF48498, PR00455, PR00455, G3DSA:1.10.10.60, PTHR30328, G3DSA:1.10.357.10	TetR-type HTH domain profile., Bacterial regulatory proteins, tetR family, TetR bacterial regulatory protein HTH signature, TetR bacterial regulatory protein HTH signature	IPR009057, IPR001647, IPR001647, IPR036271, IPR001647, IPR001647, IPR039419	Homeobox-like domain superfamily, DNA-binding HTH domain, TetR-type, DNA-binding HTH domain, TetR-type, Tetracyclin repressor-like, C-terminal domain superfamily, DNA-binding HTH domain, TetR-type, DNA-binding HTH domain, TetR-type, TetR transcription regulator	GO:0003677, GO:0003677, GO:0003677, GO:0003677, GO:0003677
NC_008261.1_0_28	195103.CPF_0036	7.5e-220	769.6	Clostridiaceae				ko:K03699					ko00000,ko02042				Bacteria	1TPN0@1239,2489N@186801,36F3D@31979,COG1253@1,COG1253@2	NA|NA|NA	S	CBS domain	ProSiteProfiles, Gene3D, SUPERFAMILY, Pfam, SUPERFAMILY, ProSiteProfiles, CDD, Pfam, Pfam, PANTHER, CDD, SMART, Pfam, ProSiteProfiles, PANTHER, Gene3D, SMART, SMART	PS51371, G3DSA:3.10.580.10, SSF54631, PF01595, SSF56176, PS51846, cd02205, PF00571, PF00571, PTHR22777, cd04590, SM01091, PF03471, PS51371, PTHR22777:SF3, G3DSA:3.30.465.10, SM00116, SM00116	CBS domain profile., Domain of unknown function DUF21, CNNM transmembrane domain profile., CBS_pair, CBS domain, CBS domain, CBS_pair_CorC_HlyC_assoc, Transporter associated domain, CBS domain profile.	IPR000644, IPR002550, IPR036318, IPR002550, IPR000644, IPR000644, IPR005170, IPR005170, IPR000644, IPR016169, IPR000644, IPR000644	CBS domain, CNNM, transmembrane domain, FAD-binding, type PCMH-like superfamily, CNNM, transmembrane domain, CBS domain, CBS domain, Transporter-associated domain, Transporter-associated domain, CBS domain, FAD-binding, type PCMH, subdomain 2, CBS domain, CBS domain	GO:0050660
NC_008261.1_0_29	195103.CPF_0037	9.1e-77	292.7	Clostridiaceae	tadA	GO:0002097,GO:0002100,GO:0006139,GO:0006382,GO:0006396,GO:0006399,GO:0006400,GO:0006725,GO:0006807,GO:0008033,GO:0008150,GO:0008152,GO:0009451,GO:0009987,GO:0010467,GO:0016070,GO:0016553,GO:0034470,GO:0034641,GO:0034660,GO:0043170,GO:0043412,GO:0044237,GO:0044238,GO:0046483,GO:0071704,GO:0090304,GO:1901360	3.5.4.33	ko:K11991			R10223	RC00477	ko00000,ko01000,ko03016				Bacteria	1V3HZ@1239,24JM2@186801,36IRD@31979,COG0590@1,COG0590@2	NA|NA|NA	FJ	Catalyzes the deamination of adenosine to inosine at the wobble position 34 of tRNA(Arg2)	ProSiteProfiles, Gene3D, Hamap, Pfam, PANTHER, PANTHER, CDD, SUPERFAMILY, ProSitePatterns	PS51747, G3DSA:3.40.140.10, MF_00972, PF14437, PTHR11079:SF149, PTHR11079, cd01285, SSF53927, PS00903	Cytidine and deoxycytidylate deaminases domain profile., tRNA-specific adenosine deaminase [tadA]., MafB19-like deaminase, nucleoside_deaminase, Cytidine and deoxycytidylate deaminases zinc-binding region signature.	IPR002125, IPR028883, IPR028883, IPR016193, IPR016192	Cytidine and deoxycytidylate deaminase domain, tRNA-specific adenosine deaminase, tRNA-specific adenosine deaminase, Cytidine deaminase-like, APOBEC/CMP deaminase, zinc-binding	GO:0002100, GO:0008251, GO:0002100, GO:0008251, GO:0003824, GO:0008270, GO:0016787	Reactome: R-HSA-6782315, Reactome: R-HSA-6782315
NC_008261.1_0_3	195103.CPF_0003	4.7e-31	139.8	Clostridiaceae	yaaA	GO:0003674,GO:0003676,GO:0003723,GO:0005488,GO:0005575,GO:0005622,GO:0005623,GO:0005737,GO:0005829,GO:0006412,GO:0006518,GO:0006807,GO:0008150,GO:0008152,GO:0009058,GO:0009059,GO:0009987,GO:0010467,GO:0019538,GO:0034641,GO:0034645,GO:0043043,GO:0043170,GO:0043603,GO:0043604,GO:0044237,GO:0044238,GO:0044249,GO:0044260,GO:0044267,GO:0044271,GO:0044424,GO:0044444,GO:0044464,GO:0071704,GO:0097159,GO:…		ko:K14761					ko00000,ko03009				Bacteria	1VYQT@1239,24QZU@186801,36MKH@31979,COG2501@1,COG2501@2	NA|NA|NA	S	S4 domain protein	Gene3D, PANTHER, CDD, Pfam, ProSiteProfiles, PANTHER, SUPERFAMILY, TIGRFAM	G3DSA:3.10.290.10, PTHR32319, cd00165, PF13275, PS50889, PTHR32319:SF3, SSF55174, TIGR02988	S4, S4 domain, S4 RNA-binding domain profile., YaaA_near_RecF: S4 domain protein YaaA	IPR036986, IPR002942, IPR002942, IPR014330	RNA-binding S4 domain superfamily, RNA-binding S4 domain, RNA-binding S4 domain, RNA-binding S4-related,YaaA	GO:0003723, GO:0003723, GO:0003723	Reactome: R-HSA-156827|Reactome: R-HSA-156902|Reactome: R-HSA-1799339|Reactome: R-HSA-192823|Reactome: R-HSA-2408557|Reactome: R-HSA-6791226|Reactome: R-HSA-72649|Reactome: R-HSA-72689|Reactome: R-HSA-72695|Reactome: R-HSA-72702|Reactome: R-HSA-72706|Reactome: R-HSA-72764|Reactome: R-HSA-9010553|Reactome: R-HSA-975956|Reactome: R-HSA-975957, Reactome: R-HSA-156827|Reactome: R-HSA-156902|Reactome:…
NC_008261.1_0_31	195103.CPF_0039	2.8e-42	177.9	Clostridiaceae													Bacteria	1VH2I@1239,24P98@186801,2E6H5@1,3314C@2,36M10@31979	NA|NA|NA	S	Protein of unknown function (DUF2809)	Pfam	PF10990	Protein of unknown function (DUF2809)	IPR021257	Protein of unknown function DUF2809
NC_008261.1_0_32	195103.CPF_0040	4.9e-114	417.2	Clostridiaceae			3.4.17.14,3.5.1.28	ko:K01448,ko:K02395,ko:K07260	ko00550,ko01100,ko01502,ko01503,ko02020,map00550,map01100,map01502,map01503,map02020	M00651,M00727	R04112	RC00064,RC00141	ko00000,ko00001,ko00002,ko01000,ko01002,ko01011,ko01504,ko02035,ko03036				Bacteria	1UIRE@1239,25EQ5@186801,36UR4@31979,COG1705@1,COG1705@2	NA|NA|NA	NU	Mannosyl-glycoprotein endo-beta-N-acetylglucosaminidase	Pfam	PF01832	Mannosyl-glycoprotein endo-beta-N-acetylglucosaminidase	IPR002901	Mannosyl-glycoprotein endo-beta-N-acetylglucosamidase-like domain	GO:0004040
NC_008261.1_0_33	195103.CPF_0041	3.3e-280	970.3	Clostridiaceae	ydiU												Bacteria	1TQXD@1239,249Y9@186801,36FWS@31979,COG0397@1,COG0397@2	NA|NA|NA	S	Belongs to the UPF0061 (SELO) family	Hamap, PANTHER, Pfam	MF_00692, PTHR32057, PF02696	UPF0061 protein YdiU [ydiU]., Uncharacterized ACR, YdiU/UPF0061 family	IPR003846, IPR003846, IPR003846	Uncharacterised protein family UPF0061, Uncharacterised protein family UPF0061, Uncharacterised protein family UPF0061
NC_008261.1_0_34	195103.CPF_0042	1.7e-234	818.1	Clostridiaceae	plc	GO:0001906,GO:0003674,GO:0003824,GO:0005575,GO:0005576,GO:0008150,GO:0009987,GO:0016787,GO:0019835,GO:0031640,GO:0035821,GO:0044179,GO:0044364,GO:0044419,GO:0044764,GO:0051704,GO:0051715	3.1.4.3	ko:K16619	ko00562,ko00564,ko00565,ko01100,ko01110,ko02024,map00562,map00564,map00565,map01100,map01110,map02024		R01312,R02027,R02052,R03332,R07381	RC00017,RC00425	ko00000,ko00001,ko01000,ko02042				Bacteria	1VRDM@1239,25DKZ@186801,2EXCY@1,33QPJ@2,36DZQ@31979	NA|NA|NA	G	PLAT/LH2 domain	Pfam, Gene3D, PRINTS, PRINTS, PRINTS, PRINTS, PRINTS, Gene3D, CDD, ProSiteProfiles, ProSiteProfiles, ProSitePatterns, SUPERFAMILY, Pfam, SUPERFAMILY, SMART, ProDom, CDD	PF01477, G3DSA:2.60.60.20, PR00479, PR00479, PR00479, PR00479, PR00479, G3DSA:1.10.575.10, cd10981, PS51346, PS50095, PS00384, SSF48537, PF00882, SSF49723, SM00770, PD003946, cd00113	PLAT/LH2 domain, Prokaryotic zinc-dependent phospholipase C signature, Prokaryotic zinc-dependent phospholipase C signature, Prokaryotic zinc-dependent phospholipase C signature, Prokaryotic zinc-dependent phospholipase C signature, Prokaryotic zinc-dependent phospholipase C signature, ZnPC_S1P1, Prokaryotic zinc-dependent phospholipase C domain profile., PLAT domain profile., Prokaryotic zinc-de…	IPR001024, IPR001531, IPR001531, IPR001531, IPR001531, IPR001531, IPR008947, IPR001531, IPR001024, IPR001531, IPR008947, IPR029002, IPR036392, IPR001531, IPR001531	PLAT/LH2 domain, Zinc-dependent phospholipase C, Zinc-dependent phospholipase C, Zinc-dependent phospholipase C, Zinc-dependent phospholipase C, Zinc-dependent phospholipase C, Phospholipase C/P1 nuclease domain superfamily, Zinc-dependent phospholipase C, PLAT/LH2 domain, Zinc-dependent phospholipase C, Phospholipase C/P1 nuclease domain superfamily, Phospholipase C/D, PLAT/LH2 domain superfamil…	GO:0005515, GO:0004629, GO:0008270, GO:0004629, GO:0008270, GO:0004629, GO:0008270, GO:0004629, GO:0008270, GO:0004629, GO:0008270, GO:0016788, GO:0004629, GO:0008270, GO:0005515, GO:0004629, GO:0008270, GO:0016788, GO:0005515, GO:0004629, GO:0008270, GO:0004629, GO:0008270	KEGG: 00562+3.1.4.3|KEGG: 00564+3.1.4.3|KEGG: 00565+3.1.4.3|MetaCyc: PWY-7782|MetaCyc: PWY-7783, KEGG: 00562+3.1.4.3|KEGG: 00564+3.1.4.3|KEGG: 00565+3.1.4.3|MetaCyc: PWY-7782|MetaCyc: PWY-7783, KEGG: 00562+3.1.4.3|KEGG: 00564+3.1.4.3|KEGG: 00565+3.1.4.3|MetaCyc: PWY-7782|MetaCyc: PWY-7783, KEGG: 00562+3.1.4.3|KEGG: 00564+3.1.4.3|KEGG: 00565+3.1.4.3|MetaCyc: PWY-7782|MetaCyc: PWY-7783, KEGG: 00562…
NC_008261.1_0_35	195103.CPF_0043	7.2e-172	609.8	Clostridiaceae	yeiR	GO:0003674,GO:0003824,GO:0003924,GO:0005488,GO:0008270,GO:0016462,GO:0016787,GO:0016817,GO:0016818,GO:0017111,GO:0043167,GO:0043169,GO:0046872,GO:0046914											Bacteria	1TPCG@1239,248XD@186801,36EC9@31979,COG0523@1,COG0523@2	NA|NA|NA	S	cobalamin synthesis protein	SUPERFAMILY, Gene3D, Pfam, Pfam, PANTHER, SMART, SUPERFAMILY, PANTHER	SSF90002, G3DSA:3.40.50.300, PF02492, PF07683, PTHR13748, SM00833, SSF52540, PTHR13748:SF31	CobW/HypB/UreG, nucleotide-binding domain, Cobalamin synthesis protein cobW C-terminal domain	IPR003495, IPR011629, IPR011629, IPR027417	CobW/HypB/UreG, nucleotide-binding domain, Cobalamin (vitamin B12) biosynthesis CobW-like, C-terminal, Cobalamin (vitamin B12) biosynthesis CobW-like, C-terminal, P-loop containing nucleoside triphosphate hydrolase
NC_008261.1_0_36	195103.CPF_0044	1.5e-103	382.1	Clostridiaceae	yeiR	GO:0003674,GO:0003824,GO:0003924,GO:0005488,GO:0008270,GO:0016462,GO:0016787,GO:0016817,GO:0016818,GO:0017111,GO:0043167,GO:0043169,GO:0046872,GO:0046914		ko:K07089					ko00000				Bacteria	1TS8P@1239,248DY@186801,36HIS@31979,COG0523@1,COG0523@2	NA|NA|NA	S	CobW/HypB/UreG, nucleotide-binding domain	Gene3D, PANTHER, SUPERFAMILY, Coils, PANTHER, Pfam	G3DSA:3.40.50.300, PTHR13748, SSF52540, Coil, PTHR13748:SF31, PF02492	CobW/HypB/UreG, nucleotide-binding domain	IPR027417, IPR003495	P-loop containing nucleoside triphosphate hydrolase, CobW/HypB/UreG, nucleotide-binding domain
NC_008261.1_0_37	195103.CPF_0045	1.2e-150	539.3	Clostridiaceae	ycgR			ko:K07089					ko00000				Bacteria	1TQHK@1239,25CG7@186801,36FSQ@31979,COG0701@1,COG0701@2	NA|NA|NA	S	Permease	Pfam, PANTHER	PF03773, PTHR34184	Predicted permease	IPR005524	Predicted permease DUF318
NC_008261.1_0_38	195103.CPF_0046	2.2e-123	448.4	Clostridiaceae				ko:K08986					ko00000				Bacteria	1UF6H@1239,24GNI@186801,36ICA@31979,COG3689@1,COG3689@2	NA|NA|NA	S	TIGRFAM TIGR03943 family protein	PANTHER	PTHR40047		IPR015402	Protein of unknown function DUF1980
NC_008261.1_0_39	195103.CPF_0047	5.4e-144	516.9	Clostridiaceae	lgt	GO:0003674,GO:0003824,GO:0005575,GO:0005623,GO:0005886,GO:0005887,GO:0006464,GO:0006807,GO:0008150,GO:0008152,GO:0008961,GO:0009058,GO:0009059,GO:0009249,GO:0009898,GO:0009987,GO:0010467,GO:0016020,GO:0016021,GO:0016740,GO:0016757,GO:0018065,GO:0018193,GO:0018205,GO:0019538,GO:0031224,GO:0031226,GO:0034645,GO:0036211,GO:0040007,GO:0042157,GO:0042158,GO:0043170,GO:0043412,GO:0044237,GO:0044238,GO:…	2.1.1.199	ko:K03438,ko:K13292					ko00000,ko01000,ko03009				Bacteria	1TPAK@1239,24APG@186801,36F3Y@31979,COG0682@1,COG0682@2	NA|NA|NA	M	Transfers the N-acyl diglyceride group on what will become the N-terminal cysteine of membrane lipoproteins	ProSitePatterns, PANTHER, Hamap, TIGRFAM, Pfam	PS01311, PTHR30589, MF_01147, TIGR00544, PF01790	Prolipoprotein diacylglyceryl transferase signature., Prolipoprotein diacylglyceryl transferase [lgt]., lgt: prolipoprotein diacylglyceryl transferase, Prolipoprotein diacylglyceryl transferase	IPR001640, IPR001640, IPR001640, IPR001640, IPR001640	Prolipoprotein diacylglyceryl transferase, Prolipoprotein diacylglyceryl transferase, Prolipoprotein diacylglyceryl transferase, Prolipoprotein diacylglyceryl transferase, Prolipoprotein diacylglyceryl transferase	GO:0016020, GO:0016757, GO:0042158, GO:0016020, GO:0016757, GO:0042158, GO:0016020, GO:0016757, GO:0042158, GO:0016020, GO:0016757, GO:0042158, GO:0016020, GO:0016757, GO:0042158
NC_008261.1_0_4	195103.CPF_0004	1.7e-196	691.8	Clostridiaceae	recF	GO:0000731,GO:0005575,GO:0005622,GO:0005623,GO:0006139,GO:0006259,GO:0006281,GO:0006302,GO:0006725,GO:0006807,GO:0006950,GO:0006974,GO:0008150,GO:0008152,GO:0009058,GO:0009059,GO:0009295,GO:0009987,GO:0018130,GO:0019438,GO:0033554,GO:0034641,GO:0034645,GO:0034654,GO:0043170,GO:0043226,GO:0043228,GO:0043229,GO:0043232,GO:0043590,GO:0044237,GO:0044238,GO:0044249,GO:0044260,GO:0044271,GO:0044424,GO:…		ko:K03629	ko03440,map03440				ko00000,ko00001,ko03400				Bacteria	1TP9U@1239,247KY@186801,36DP1@31979,COG1195@1,COG1195@2	NA|NA|NA	L	it is required for DNA replication and normal SOS inducibility. RecF binds preferentially to single-stranded, linear DNA. It also seems to bind ATP	Pfam, CDD, PANTHER, Hamap, Gene3D, PANTHER, SUPERFAMILY, TIGRFAM, ProSitePatterns, Gene3D, ProSitePatterns	PF02463, cd03242, PTHR32182, MF_00365, G3DSA:1.20.1050.90, PTHR32182:SF0, SSF52540, TIGR00611, PS00617, G3DSA:3.40.50.300, PS00618	RecF/RecN/SMC N terminal domain, ABC_RecF, DNA replication and repair protein RecF [recF]., recf: DNA replication and repair protein RecF, RecF protein signature 1., RecF protein signature 2.	IPR003395, IPR001238, IPR001238, IPR027417, IPR001238, IPR018078, IPR018078	RecF/RecN/SMC, N-terminal, DNA-binding, RecF, DNA-binding, RecF, P-loop containing nucleoside triphosphate hydrolase, DNA-binding, RecF, DNA-binding, RecF, conserved site, DNA-binding, RecF, conserved site	GO:0003697, GO:0005524, GO:0006281, GO:0003697, GO:0005524, GO:0006281, GO:0003697, GO:0005524, GO:0006281, GO:0003697, GO:0005524, GO:0006281, GO:0003697, GO:0005524, GO:0006281
NC_008261.1_0_40	NA	NA	NA	NA	NA	NA	NA	NA	NA	NA	NA	NA	NA	NA	NA	NA	NA	NA	NA	NA	NA	Coils, ProSiteProfiles	Coil, PS51257	Prokaryotic membrane lipoprotein lipid attachment site profile.
NC_008261.1_0_41	195103.CPF_0050	8.7e-224	782.7	Clostridiaceae	brnQ			ko:K03311					ko00000	2.A.26			Bacteria	1TQIS@1239,248I0@186801,36DC1@31979,COG1114@1,COG1114@2	NA|NA|NA	E	Component of the transport system for branched-chain amino acids	Pfam, TIGRFAM, PANTHER	PF05525, TIGR00796, PTHR30588	Branched-chain amino acid transport protein, livcs: branched-chain amino acid transport system II carrier protein	IPR004685, IPR004685, IPR004685	Branched-chain amino acid transport system II carrier protein, Branched-chain amino acid transport system II carrier protein, Branched-chain amino acid transport system II carrier protein	GO:0015658, GO:0015803, GO:0016021, GO:0015658, GO:0015803, GO:0016021, GO:0015658, GO:0015803, GO:0016021
NC_008261.1_0_42	195103.CPF_0051	6e-85	320.1	Clostridiaceae	folA		1.5.1.3	ko:K00287,ko:K18589	ko00670,ko00790,ko01100,ko01523,map00670,map00790,map01100,map01523	M00126,M00840	R00936,R00937,R00939,R00940,R02235,R02236,R11765	RC00109,RC00110,RC00158	br01600,ko00000,ko00001,ko00002,ko01000,ko01504				Bacteria	1VB80@1239,24FTH@186801,36IZC@31979,COG0262@1,COG0262@2	NA|NA|NA	H	Key enzyme in folate metabolism. Catalyzes an essential reaction for de novo glycine and purine synthesis, and for DNA precursor synthesis	PIRSF, Pfam, Gene3D, CDD, PRINTS, PRINTS, PRINTS, PRINTS, PANTHER, SUPERFAMILY, ProSiteProfiles, PANTHER	PIRSF000194, PF00186, G3DSA:3.40.430.10, cd00209, PR00070, PR00070, PR00070, PR00070, PTHR22778, SSF53597, PS51330, PTHR22778:SF16	Dihydrofolate reductase, DHFR, Dihydrofolate reductase signature, Dihydrofolate reductase signature, Dihydrofolate reductase signature, Dihydrofolate reductase signature, Dihydrofolate reductase (DHFR) domain profile.	IPR012259, IPR001796, IPR024072, IPR001796, IPR024072, IPR001796, IPR012259	Dihydrofolate reductase, Dihydrofolate reductase domain, Dihydrofolate reductase-like domain superfamily, Dihydrofolate reductase domain, Dihydrofolate reductase-like domain superfamily, Dihydrofolate reductase domain, Dihydrofolate reductase	GO:0004146, GO:0006545, GO:0046654, GO:0050661, GO:0055114, GO:0004146, GO:0046654, GO:0055114, GO:0004146, GO:0046654, GO:0055114, GO:0004146, GO:0046654, GO:0055114, GO:0004146, GO:0006545, GO:0046654, GO:0050661, GO:0055114	KEGG: 00670+1.5.1.3|KEGG: 00790+1.5.1.3|MetaCyc: PWY-3841|MetaCyc: PWY-6614, KEGG: 00670+1.5.1.3|KEGG: 00790+1.5.1.3|MetaCyc: PWY-3841|MetaCyc: PWY-6614|Reactome: R-HSA-196757, Reactome: R-HSA-196757, KEGG: 00670+1.5.1.3|KEGG: 00790+1.5.1.3|MetaCyc: PWY-3841|MetaCyc: PWY-6614|Reactome: R-HSA-196757, Reactome: R-HSA-196757, KEGG: 00670+1.5.1.3|KEGG: 00790+1.5.1.3|MetaCyc: PWY-3841|MetaCyc: PWY-661…
NC_008261.1_0_43	195103.CPF_0052	4.7e-299	1033.1	Clostridiaceae	dnaX		2.7.7.7	ko:K02343	ko00230,ko00240,ko01100,ko03030,ko03430,ko03440,map00230,map00240,map01100,map03030,map03430,map03440	M00260	R00375,R00376,R00377,R00378	RC02795	ko00000,ko00001,ko00002,ko01000,ko03032,ko03400				Bacteria	1TPS9@1239,247J7@186801,36DBN@31979,COG2812@1,COG2812@2	NA|NA|NA	L	DNA polymerase III is a complex, multichain enzyme responsible for most of the replicative synthesis in bacteria. This DNA polymerase also exhibits 3 to 5 exonuclease activity	SMART, Pfam, Coils, TIGRFAM, Gene3D, Coils, Gene3D, PANTHER, SUPERFAMILY, MobiDBLite, Pfam, SUPERFAMILY, PANTHER, CDD, Gene3D	SM00382, PF13177, Coil, TIGR02397, G3DSA:1.20.272.10, Coil, G3DSA:1.10.8.60, PTHR11669:SF0, SSF48019, mobidb-lite, PF12169, SSF52540, PTHR11669, cd00009, G3DSA:3.40.50.300	DNA polymerase III, delta subunit, dnaX_nterm: DNA polymerase III, subunit gamma and tau, consensus disorder prediction, DNA polymerase III subunits gamma and tau domain III, AAA	IPR003593, IPR012763, IPR008921, IPR022754, IPR027417	AAA+ ATPase domain, DNA polymerase III, subunit gamma/ tau, DNA polymerase III, clamp loader complex, gamma/delta/delta subunit, C-terminal, DNA polymerase III, gamma subunit, domain III, P-loop containing nucleoside triphosphate hydrolase	GO:0003887, GO:0005524, GO:0006260, GO:0009360, GO:0003677, GO:0006260, GO:0003887	Reactome: R-HSA-110312|Reactome: R-HSA-110314|Reactome: R-HSA-110320|Reactome: R-HSA-174411|Reactome: R-HSA-5651801|Reactome: R-HSA-5655862|Reactome: R-HSA-5656121|Reactome: R-HSA-5656169|Reactome: R-HSA-5685942|Reactome: R-HSA-5696397|Reactome: R-HSA-5696400|Reactome: R-HSA-6782135|Reactome: R-HSA-6782210|Reactome: R-HSA-69091
NC_008261.1_0_44	195103.CPF_0053	2e-47	194.9	Clostridiaceae	yaaK			ko:K09747					ko00000				Bacteria	1VA1S@1239,24MXH@186801,36JG6@31979,COG0718@1,COG0718@2	NA|NA|NA	S	Binds to DNA and alters its conformation. May be involved in regulation of gene expression, nucleoid organization and DNA protection	MobiDBLite, TIGRFAM, Hamap, Coils, PIRSF, PANTHER, PANTHER, Pfam, Gene3D, SUPERFAMILY	mobidb-lite, TIGR00103, MF_00274, Coil, PIRSF004555, PTHR33449:SF1, PTHR33449, PF02575, G3DSA:3.30.1310.10, SSF82607	consensus disorder prediction, DNA_YbaB_EbfC: DNA-binding protein, YbaB/EbfC family, Nucleoid-associated protein YbaB [ybaB]., YbaB/EbfC DNA-binding family	IPR004401, IPR004401, IPR004401, IPR004401, IPR004401, IPR036894, IPR036894	Nucleoid-associated protein YbaB/EbfC family, Nucleoid-associated protein YbaB/EbfC family, Nucleoid-associated protein YbaB/EbfC family, Nucleoid-associated protein YbaB/EbfC family, Nucleoid-associated protein YbaB/EbfC family, Nucleoid-associated protein YbaB-like domain superfamily, Nucleoid-associated protein YbaB-like domain superfamily
NC_008261.1_0_45	195103.CPF_0054	4e-107	394	Clostridiaceae	recR	GO:0000731,GO:0006139,GO:0006259,GO:0006281,GO:0006302,GO:0006310,GO:0006725,GO:0006807,GO:0006950,GO:0006974,GO:0008150,GO:0008152,GO:0009058,GO:0009059,GO:0009314,GO:0009411,GO:0009416,GO:0009628,GO:0009987,GO:0018130,GO:0019438,GO:0033554,GO:0034641,GO:0034645,GO:0034654,GO:0043170,GO:0044237,GO:0044238,GO:0044249,GO:0044260,GO:0044271,GO:0046483,GO:0050896,GO:0051716,GO:0071704,GO:0071897,GO:…		ko:K06187	ko03440,map03440				ko00000,ko00001,ko03400				Bacteria	1TR87@1239,2487H@186801,36EFC@31979,COG0353@1,COG0353@2	NA|NA|NA	L	May play a role in DNA repair. It seems to be involved in an RecBC-independent recombinational process of DNA repair. It may act with RecF and RecO	Hamap, ProSiteProfiles, Pfam, SUPERFAMILY, CDD, TIGRFAM, Gene3D, SMART, Gene3D, Pfam, PANTHER	MF_00017, PS50880, PF13662, SSF111304, cd01025, TIGR00615, G3DSA:3.40.1360.10, SM00493, G3DSA:1.10.8.420, PF02132, PTHR30446	Recombination protein RecR [recR]., Toprim domain profile., Toprim domain, TOPRIM_recR, recR: recombination protein RecR, RecR protein	IPR000093, IPR006171, IPR006171, IPR023627, IPR034137, IPR000093, IPR006171, IPR023628, IPR000093	DNA recombination protein RecR, TOPRIM domain, TOPRIM domain, Recombination protein RecR, RecR, TOPRIM domain, DNA recombination protein RecR, TOPRIM domain, Recombination protein RecR, C4-type zinc finger, DNA recombination protein RecR	GO:0003677, GO:0006281, GO:0006310, GO:0003677, GO:0006281, GO:0006310, GO:0003677, GO:0006281, GO:0006310
NC_008261.1_0_46	318464.IO99_14990	4e-09	67.4	Clostridiaceae													Bacteria	1VKRW@1239,24UHR@186801,2EGKS@1,33ACZ@2,36N53@31979	NA|NA|NA	S	Protein of unknown function (DUF2508)	Pfam	PF10704	Protein of unknown function (DUF2508)	IPR019644	Protein of unknown function DUF2508
NC_008261.1_0_47	NA	NA	NA	NA	NA	NA	NA	NA	NA	NA	NA	NA	NA	NA	NA	NA	NA	NA	NA	NA	NA	TIGRFAM, Pfam	TIGR02862, PF07441	spore_BofA: pro-sigmaK processing inhibitor BofA, SigmaK-factor processing regulatory protein BofA	IPR010001, IPR010001	SigmaK-factor processing regulatory BofA, SigmaK-factor processing regulatory BofA
NC_008261.1_0_48	NA	NA	NA	NA	NA	NA	NA	NA	NA	NA	NA	NA	NA	NA	NA	NA	NA	NA	NA	NA	NA	Pfam	PF12698	ABC-2 family transporter protein
NC_008261.1_0_5	195103.CPF_0005	1.7e-39	168.3	Clostridiaceae	yaaB												Bacteria	1VEZV@1239,24MQP@186801,2E36Q@1,32Y6E@2,36KFK@31979	NA|NA|NA	S	Domain of unknown function (DUF370)	Pfam	PF04025	Domain of unknown function (DUF370)	IPR007169	Extracellular matrix regulatory protein A
NC_008261.1_0_50	195103.CPF_0058	3.8e-29	133.3	Clostridiaceae													Bacteria	1W3I3@1239,24V1R@186801,28V66@1,2ZH9D@2,36PAE@31979	NA|NA|NA			NA	NA	NA	NA	NA	NA	NA
NC_008261.1_0_52	195103.CPF_0060	3.5e-202	710.7	Clostridiaceae	dhsS		1.12.1.2	ko:K00436			R00700		ko00000,ko01000			iJN678.sll1559,iSB619.SA_RS08700	Bacteria	1TPS0@1239,24919@186801,36E72@31979,COG0075@1,COG0075@2	NA|NA|NA	E	Aminotransferase	Gene3D, PIRSF, Gene3D, PANTHER, PANTHER, SUPERFAMILY, Pfam	G3DSA:3.40.640.10, PIRSF000524, G3DSA:3.90.1150.10, PTHR21152, PTHR21152:SF31, SSF53383, PF00266	Aminotransferase class-V	IPR015421, IPR024169, IPR015422, IPR015424, IPR000192	Pyridoxal phosphate-dependent transferase, major domain, Serine-pyruvate aminotransferase/2-aminoethylphosphonate-pyruvate transaminase, Pyridoxal phosphate-dependent transferase domain 1, Pyridoxal phosphate-dependent transferase, Aminotransferase class V domain	GO:0003824, GO:0003824	KEGG: 00440+2.6.1.37|MetaCyc: PWY-6832|Reactome: R-HSA-389661|Reactome: R-HSA-9033241
NC_008261.1_0_53	195103.CPF_0061	2e-158	565.1	Clostridiaceae	serA		1.1.1.399,1.1.1.95	ko:K00058	ko00260,ko00680,ko01100,ko01120,ko01130,ko01200,ko01230,map00260,map00680,map01100,map01120,map01130,map01200,map01230	M00020	R01513	RC00031	ko00000,ko00001,ko00002,ko01000,ko04147				Bacteria	1V410@1239,248H9@186801,36DCU@31979,COG0111@1,COG0111@2	NA|NA|NA	EH	D-isomer specific 2-hydroxyacid dehydrogenase	ProSitePatterns, PANTHER, Gene3D, SUPERFAMILY, Pfam, SUPERFAMILY, CDD, Pfam, Gene3D, PANTHER	PS00065, PTHR42938:SF9, G3DSA:3.40.50.720, SSF51735, PF00389, SSF52283, cd05303, PF02826, G3DSA:3.40.50.720, PTHR42938	D-isomer specific 2-hydroxyacid dehydrogenases NAD-binding signature., D-isomer specific 2-hydroxyacid dehydrogenase, catalytic domain, PGDH_2, D-isomer specific 2-hydroxyacid dehydrogenase, NAD binding domain	IPR029752, IPR036291, IPR006139, IPR006140	D-isomer specific 2-hydroxyacid dehydrogenase, NAD-binding domain conserved site 1, NAD(P)-binding domain superfamily, D-isomer specific 2-hydroxyacid dehydrogenase, catalytic domain, D-isomer specific 2-hydroxyacid dehydrogenase, NAD-binding domain	GO:0016616, GO:0051287, GO:0055114, GO:0051287, GO:0055114
NC_008261.1_0_54	195103.CPF_0062	1.3e-235	822	Clostridiaceae	gdh		1.4.1.4	ko:K00262	ko00220,ko00250,ko00910,ko01100,map00220,map00250,map00910,map01100		R00248	RC00006,RC02799	ko00000,ko00001,ko01000				Bacteria	1TQSW@1239,249E4@186801,36DKE@31979,COG4198@1,COG4198@2	NA|NA|NA	S	Protein of unknown function (DUF1015)	PIRSF, Pfam, PANTHER	PIRSF033563, PF06245, PTHR36454	Protein of unknown function (DUF1015)	IPR008323, IPR008323, IPR008323	Uncharacterised conserved protein UCP033563, Uncharacterised conserved protein UCP033563, Uncharacterised conserved protein UCP033563
NC_008261.1_0_55	195103.CPF_0063	5e-125	453.8	Clostridiaceae	mtnN		3.2.2.26,3.2.2.9	ko:K01243,ko:K11783	ko00130,ko00270,ko01100,ko01110,ko01230,map00130,map00270,map01100,map01110,map01230	M00034,M00609	R00194,R01401,R08587	RC00063,RC00318	ko00000,ko00001,ko00002,ko01000				Bacteria	1U7WK@1239,247U5@186801,36EHM@31979,COG0775@1,COG0775@2	NA|NA|NA	E	Catalyzes the irreversible cleavage of the glycosidic bond in both 5-methylthioadenosine (MTA) and S- adenosylhomocysteine (SAH AdoHcy) to adenine and the corresponding thioribose, 5-methylthioribose and S-ribosylhomocysteine, respectively	Pfam, PANTHER, PANTHER, Coils, SUPERFAMILY, Gene3D, TIGRFAM	PF01048, PTHR21234, PTHR21234, Coil, SSF53167, G3DSA:3.40.50.1580, TIGR01704	Phosphorylase superfamily, MTA/SAH-Nsdase: MTA/SAH nucleosidase	IPR000845, IPR035994, IPR010049	Nucleoside phosphorylase domain, Nucleoside phosphorylase superfamily, MTA/SAH nucleosidase	GO:0003824, GO:0009116, GO:0003824, GO:0009116, GO:0008782, GO:0008930, GO:0009164, GO:0019509	KEGG: 00270+3.2.2.9|MetaCyc: PWY-6151|MetaCyc: PWY-6153|MetaCyc: PWY-6154
NC_008261.1_0_56	195103.CPF_0064	1.5e-135	488.8	Clostridiaceae	tcdA			ko:K22132					ko00000,ko03016				Bacteria	1TQ7A@1239,248RA@186801,36F3J@31979,COG1179@1,COG1179@2	NA|NA|NA	H	PFAM UBA THIF-type NAD FAD binding protein	CDD, SUPERFAMILY, PANTHER, PANTHER, Pfam, Gene3D	cd00755, SSF69572, PTHR43267:SF1, PTHR43267, PF00899, G3DSA:3.40.50.720	YgdL_like, ThiF family	IPR035985, IPR000594	Ubiquitin-activating enzyme, THIF-type NAD/FAD binding fold	GO:0008641, GO:0008641
NC_008261.1_0_57	195103.CPF_0065	1e-202	712.6	Clostridiaceae				ko:K02429					ko00000,ko02000	2.A.1.7			Bacteria	1TPB5@1239,24913@186801,36GA9@31979,COG0738@1,COG0738@2	NA|NA|NA	G	Major facilitator superfamily	Gene3D, PANTHER, ProSiteProfiles, Pfam, Gene3D, CDD, PANTHER, SUPERFAMILY	G3DSA:1.20.1250.20, PTHR43702:SF7, PS50850, PF07690, G3DSA:1.20.1250.20, cd06174, PTHR43702, SSF103473	Major facilitator superfamily (MFS) profile., Major Facilitator Superfamily, MFS	IPR020846, IPR011701, IPR020846, IPR036259	Major facilitator superfamily domain, Major facilitator superfamily, Major facilitator superfamily domain, MFS transporter superfamily	GO:0016021, GO:0055085
NC_008261.1_0_58	195103.CPF_0066	1.6e-105	389.4	Clostridiaceae	yjcK		2.3.1.128	ko:K03790					ko00000,ko01000,ko03009				Bacteria	1V1ZC@1239,249K2@186801,36ESI@31979,COG1670@1,COG1670@2	NA|NA|NA	J	acetyltransferase	Gene3D, ProSiteProfiles, PANTHER, Gene3D, SUPERFAMILY, CDD, Pfam, SUPERFAMILY	G3DSA:3.40.630.30, PS51186, PTHR43792, G3DSA:3.40.630.30, SSF55729, cd04301, PF13302, SSF55729	Gcn5-related N-acetyltransferase (GNAT) domain profile., NAT_SF, Acetyltransferase (GNAT) domain	IPR000182, IPR016181, IPR000182, IPR016181	GNAT domain, Acyl-CoA N-acyltransferase, GNAT domain, Acyl-CoA N-acyltransferase
NC_008261.1_0_59	195103.CPF_0067	4.6e-107	394	Clostridiaceae	dgk2		2.7.1.74,2.7.1.76	ko:K00893,ko:K10353	ko00230,ko00240,ko01100,map00230,map00240,map01100		R00185,R01666,R02089	RC00002,RC00017	ko00000,ko00001,ko01000				Bacteria	1TPJ1@1239,24B8K@186801,36EVR@31979,COG1428@1,COG1428@2	NA|NA|NA	F	Deoxynucleoside kinase	PANTHER, Gene3D, PIRSF, SUPERFAMILY, PANTHER, CDD, Pfam	PTHR10513, G3DSA:3.40.50.300, PIRSF000705, SSF52540, PTHR10513:SF25, cd01673, PF01712	dNK, Deoxynucleoside kinase	IPR002624, IPR027417, IPR031314	Deoxynucleoside kinase, P-loop containing nucleoside triphosphate hydrolase, Deoxynucleoside kinase domain	GO:0005524, GO:0006139, GO:0019206
NC_008261.1_0_6	195103.CPF_0006	0	1248.4	Clostridiaceae	gyrB	GO:0000166,GO:0000287,GO:0003674,GO:0003824,GO:0003916,GO:0003918,GO:0005488,GO:0005524,GO:0005575,GO:0005618,GO:0005623,GO:0005886,GO:0006139,GO:0006259,GO:0006265,GO:0006725,GO:0006807,GO:0006996,GO:0007059,GO:0008094,GO:0008144,GO:0008150,GO:0008152,GO:0009295,GO:0009987,GO:0016020,GO:0016043,GO:0016462,GO:0016787,GO:0016817,GO:0016818,GO:0016853,GO:0016887,GO:0017076,GO:0017111,GO:0030312,GO:…	5.99.1.3	ko:K02470,ko:K02622					ko00000,ko01000,ko02048,ko03032,ko03036,ko03400				Bacteria	1TQ0R@1239,248AV@186801,36DYE@31979,COG0187@1,COG0187@2	NA|NA|NA	L	A type II topoisomerase that negatively supercoils closed circular double-stranded (ds) DNA in an ATP-dependent manner to modulate DNA topology and maintain chromosomes in an underwound state. Negative supercoiling favors strand separation, and DNA replication, transcription, recombination and repair, all of which involve strand separation. Also able to catalyze the interconversion of other topol…	Pfam, SMART, Hamap, SUPERFAMILY, PRINTS, PRINTS, PRINTS, PRINTS, PRINTS, PRINTS, PRINTS, PRINTS, PRINTS, PRINTS, TIGRFAM, CDD, Gene3D, PRINTS, PRINTS, PRINTS, PRINTS, PRINTS, PRINTS, PRINTS, PRINTS, PRINTS, Pfam, ProSiteProfiles, PANTHER, Pfam, CDD, Pfam, Gene3D, SMART, CDD, SUPERFAMILY, Gene3D, Coils, SUPERFAMILY, ProSitePatterns, PANTHER	PF02518, SM00387, MF_01898, SSF55874, PR01159, PR01159, PR01159, PR01159, PR01159, PR01159, PR01159, PR01159, PR01159, PR01159, TIGR01059, cd00075, G3DSA:3.30.565.10, PR00418, PR00418, PR00418, PR00418, PR00418, PR00418, PR00418, PR00418, PR00418, PF00204, PS50880, PTHR10169:SF20, PF00986, cd03366, PF01751, G3DSA:3.40.50.670, SM00433, cd00822, SSF54211, G3DSA:3.30.230.10, Coil, SSF56719, PS00177,…	Histidine kinase-, DNA gyrase B-, and HSP90-like ATPase, DNA gyrase subunit B [gyrB]., DNA gyrase subunit B signature, DNA gyrase subunit B signature, DNA gyrase subunit B signature, DNA gyrase subunit B signature, DNA gyrase subunit B signature, DNA gyrase subunit B signature, DNA gyrase subunit B signature, DNA gyrase subunit B signature, DNA gyrase subunit B signature, DNA gyrase subunit B sig…	IPR003594, IPR003594, IPR011557, IPR036890, IPR000565, IPR000565, IPR000565, IPR000565, IPR000565, IPR000565, IPR000565, IPR000565, IPR000565, IPR000565, IPR011557, IPR003594, IPR036890, IPR013506, IPR006171, IPR002288, IPR034160, IPR006171, IPR013759, IPR001241, IPR020568, IPR014721, IPR013760, IPR018522, IPR001241	Histidine kinase/HSP90-like ATPase, Histidine kinase/HSP90-like ATPase, DNA gyrase, subunit B, Histidine kinase/HSP90-like ATPase superfamily, DNA topoisomerase, type IIA, subunit B, DNA topoisomerase, type IIA, subunit B, DNA topoisomerase, type IIA, subunit B, DNA topoisomerase, type IIA, subunit B, DNA topoisomerase, type IIA, subunit B, DNA topoisomerase, type IIA, subunit B, DNA topoisomeras…	GO:0003677, GO:0003918, GO:0005524, GO:0005694, GO:0006265, GO:0003677, GO:0003918, GO:0005524, GO:0006265, GO:0003677, GO:0003918, GO:0005524, GO:0006265, GO:0003677, GO:0003918, GO:0005524, GO:0006265, GO:0003677, GO:0003918, GO:0005524, GO:0006265, GO:0003677, GO:0003918, GO:0005524, GO:0006265, GO:0003677, GO:0003918, GO:0005524, GO:0006265, GO:0003677, GO:0003918, GO:0005524, GO:0006265, GO:…	Reactome: R-HSA-4615885, Reactome: R-HSA-4615885, Reactome: R-HSA-4615885, Reactome: R-HSA-4615885, Reactome: R-HSA-4615885, Reactome: R-HSA-4615885
NC_008261.1_0_60	536232.CLM_0052	4.6e-109	400.6	Clostridiaceae													Bacteria	1V6N4@1239,24K1H@186801,2B9ZZ@1,323DM@2,36VZZ@31979	NA|NA|NA	S	COG NOG15344 non supervised orthologous group	NA	NA	NA	NA	NA	NA	NA
NC_008261.1_0_61	195103.CPF_0069	3.1e-153	547.7	Clostridiaceae	glcT			ko:K02538,ko:K03480					ko00000,ko03000				Bacteria	1TQJJ@1239,249XA@186801,36EEZ@31979,COG3711@1,COG3711@2	NA|NA|NA	K	transcriptional antiterminator	Gene3D, Gene3D, ProSiteProfiles, SMART, Gene3D, SUPERFAMILY, SUPERFAMILY, Pfam, Pfam, SUPERFAMILY, Pfam, PANTHER, PANTHER, Gene3D, ProSiteProfiles	G3DSA:1.20.58.1950, G3DSA:2.30.24.10, PS51372, SM01061, G3DSA:1.20.890.100, SSF50151, SSF63520, PF00874, PF00874, SSF63520, PF03123, PTHR30185, PTHR30185:SF3, G3DSA:1.10.1790.10, PS51372	PRD domain profile., PRD domain, PRD domain, CAT RNA binding domain, PRD domain profile.	IPR036650, IPR011608, IPR004341, IPR036650, IPR036634, IPR011608, IPR011608, IPR036634, IPR004341, IPR011608	CAT RNA-binding domain superfamily, PRD domain, CAT RNA-binding domain, CAT RNA-binding domain superfamily, PRD domain superfamily, PRD domain, PRD domain, PRD domain superfamily, CAT RNA-binding domain, PRD domain	GO:0003723, GO:0006355, GO:0003723, GO:0003723, GO:0006355, GO:0006355, GO:0006355, GO:0006355, GO:0003723, GO:0006355
NC_008261.1_0_62	195103.CPF_0070	6.1e-82	310.1	Clostridiaceae	crr			ko:K02777	ko00010,ko00500,ko00520,ko02026,ko02060,ko05111,map00010,map00500,map00520,map02026,map02060,map05111	M00265,M00266,M00268,M00270,M00272,M00303,M00806	R02738,R02780,R04111,R04394,R05132,R08559	RC00017,RC03206	ko00000,ko00001,ko00002,ko01000,ko02000	4.A.1.1.1			Bacteria	1VAEB@1239,24N5U@186801,36IRX@31979,COG2190@1,COG2190@2	NA|NA|NA	G	PTS system, glucose subfamily, IIA	Gene3D, SUPERFAMILY, ProSitePatterns, PANTHER, ProSiteProfiles, TIGRFAM, Pfam	G3DSA:2.70.70.10, SSF51261, PS00371, PTHR45008, PS51093, TIGR00830, PF00358	PTS EIIA domains phosphorylation site signature 1., PTS_EIIA type-1 domain profile., PTBA: PTS system, glucose subfamily, IIA component, phosphoenolpyruvate-dependent sugar phosphotransferase system, EIIA 1	IPR011055, IPR011055, IPR001127, IPR001127, IPR001127, IPR001127	Duplicated hybrid motif, Duplicated hybrid motif, Phosphotransferase system, sugar-specific permease EIIA type 1, Phosphotransferase system, sugar-specific permease EIIA type 1, Phosphotransferase system, sugar-specific permease EIIA type 1, Phosphotransferase system, sugar-specific permease EIIA type 1	GO:0009401, GO:0009401, GO:0009401, GO:0009401
NC_008261.1_0_63	195103.CPF_0071	1.6e-263	914.8	Clostridiaceae	nagE	GO:0003674,GO:0003824,GO:0005215,GO:0006810,GO:0006950,GO:0006974,GO:0008150,GO:0008643,GO:0009401,GO:0009987,GO:0015144,GO:0015764,GO:0016740,GO:0016772,GO:0016773,GO:0022804,GO:0022857,GO:0033554,GO:0034219,GO:0050896,GO:0051179,GO:0051234,GO:0051716,GO:0055085,GO:0071702,GO:0090563,GO:0090586,GO:1901264	2.7.1.193,2.7.1.199,2.7.1.201,2.7.1.208,2.7.1.211	ko:K02802,ko:K02803,ko:K02804,ko:K02809,ko:K02810,ko:K02818,ko:K02819,ko:K20107,ko:K20108,ko:K20116,ko:K20117,ko:K20118	ko00010,ko00500,ko00520,ko02060,map00010,map00500,map00520,map02060	M00267,M00269,M00270,M00806,M00809	R00811,R02738,R02780,R04111,R05199	RC00017,RC03206	ko00000,ko00001,ko00002,ko01000,ko02000	4.A.1.1.11,4.A.1.1.12,4.A.1.1.13,4.A.1.1.14,4.A.1.1.15,4.A.1.1.2,4.A.1.1.5,4.A.1.1.7,4.A.1.1.9,4.A.1.2.1,4.A.1.2.10,4.A.1.2.12,4.A.1.2.13,4.A.1.2.4,4.A.1.2.8,4.A.1.2.9		iECP_1309.ECP_0691	Bacteria	1TPJ8@1239,24809@186801,36DWW@31979,COG1263@1,COG1263@2,COG1264@1,COG1264@2	NA|NA|NA	G	Pts system	ProSiteProfiles, PANTHER, TIGRFAM, ProSiteProfiles, Gene3D, PANTHER, TIGRFAM, Pfam, ProSitePatterns, MobiDBLite, CDD, Pfam, SUPERFAMILY	PS51103, PTHR30009:SF4, TIGR00826, PS51098, G3DSA:3.30.1360.60, PTHR30009, TIGR01998, PF00367, PS01035, mobidb-lite, cd00212, PF02378, SSF55604	PTS_EIIC type-1 domain profile., EIIB_glc: PTS system, glucose-like IIB component, PTS_EIIB type-1 domain profile., PTS-II-BC-nag: PTS system, N-acetylglucosamine-specific IIBC component, phosphotransferase system, EIIB, PTS EIIB domains cysteine phosphorylation site signature., consensus disorder prediction, PTS_IIB_glc, Phosphotransferase system, EIIC	IPR013013, IPR001996, IPR001996, IPR036878, IPR010974, IPR018113, IPR018113, IPR018113, IPR003352, IPR036878	Phosphotransferase system, EIIC component, type 1, Phosphotransferase system, IIB component, type 1, Phosphotransferase system, IIB component, type 1, Glucose permease domain IIB, Phosphotransferase system, N-acetylglucosamine-specific IIBC component, Phosphotransferase system EIIB, cysteine phosphorylation site, Phosphotransferase system EIIB, cysteine phosphorylation site, Phosphotransferase sy…	GO:0008982, GO:0009401, GO:0008982, GO:0009401, GO:0008982, GO:0009401, GO:0008982, GO:0009401, GO:0015572, GO:0016021, GO:0019866, GO:0008982, GO:0008982, GO:0008982, GO:0008982, GO:0009401, GO:0016020, GO:0008982, GO:0009401
NC_008261.1_0_64	195103.CPF_0072	4e-87	327.4	Clostridiaceae													Bacteria	1VJ32@1239,24AXC@186801,36KMT@31979,COG1309@1,COG1309@2	NA|NA|NA	K	Transcriptional regulator TetR family	Gene3D, PANTHER, Pfam, SUPERFAMILY, ProSiteProfiles, PANTHER	G3DSA:1.10.357.10, PTHR30328, PF00440, SSF46689, PS50977, PTHR30328:SF30	Bacterial regulatory proteins, tetR family, TetR-type HTH domain profile.	IPR039419, IPR001647, IPR009057, IPR001647	TetR transcription regulator, DNA-binding HTH domain, TetR-type, Homeobox-like domain superfamily, DNA-binding HTH domain, TetR-type	GO:0003677, GO:0003677, GO:0003677
NC_008261.1_0_65	536232.CLM_0052	2.4e-110	404.8	Clostridiaceae													Bacteria	1V6N4@1239,24K1H@186801,2B9ZZ@1,323DM@2,36VZZ@31979	NA|NA|NA	S	COG NOG15344 non supervised orthologous group	NA	NA	NA	NA	NA	NA	NA
NC_008261.1_0_66	195103.CPF_0074	0	1352.8	Clostridiaceae	fusA2			ko:K02355					ko00000,ko03012,ko03029				Bacteria	1TPWN@1239,247N4@186801,36DFR@31979,COG0480@1,COG0480@2	NA|NA|NA	J	elongation factor G	Pfam, ProSiteProfiles, CDD, MobiDBLite, PANTHER, Gene3D, SUPERFAMILY, PANTHER, PRINTS, PRINTS, PRINTS, PRINTS, Gene3D, SMART, Pfam, SUPERFAMILY, SUPERFAMILY, Pfam, CDD, SUPERFAMILY, Pfam, Coils, TIGRFAM, CDD, Gene3D, CDD, MobiDBLite, SMART, Gene3D, SUPERFAMILY, Gene3D, CDD, TIGRFAM	PF00679, PS51722, cd04088, mobidb-lite, PTHR43261:SF6, G3DSA:2.40.30.10, SSF50447, PTHR43261, PR00315, PR00315, PR00315, PR00315, G3DSA:3.30.70.240, SM00838, PF00009, SSF52540, SSF54980, PF03764, cd01434, SSF54980, PF14492, Coil, TIGR00231, cd16262, G3DSA:3.40.50.300, cd03713, mobidb-lite, SM00889, G3DSA:3.30.70.870, SSF54211, G3DSA:3.30.230.10, cd04170, TIGR00484	Elongation factor G C-terminus, Translational (tr)-type guanine nucleotide-binding (G) domain profile., EFG_mtEFG_II, consensus disorder prediction, GTP-binding elongation factor signature, GTP-binding elongation factor signature, GTP-binding elongation factor signature, GTP-binding elongation factor signature, Elongation factor Tu GTP binding domain, Elongation factor G, domain IV, EFG_mtEFG1_IV…	IPR000640, IPR000795, IPR009000, IPR000795, IPR000795, IPR000795, IPR000795, IPR000640, IPR000795, IPR027417, IPR035647, IPR005517, IPR005517, IPR035647, IPR005225, IPR009022, IPR035649, IPR005517, IPR020568, IPR014721, IPR004540	Elongation factor EFG, domain V-like, Transcription factor, GTP-binding domain, Translation protein, beta-barrel domain superfamily, Transcription factor, GTP-binding domain, Transcription factor, GTP-binding domain, Transcription factor, GTP-binding domain, Transcription factor, GTP-binding domain, Elongation factor EFG, domain V-like, Transcription factor, GTP-binding domain, P-loop containing …	GO:0003924, GO:0005525, GO:0003924, GO:0005525, GO:0003924, GO:0005525, GO:0003924, GO:0005525, GO:0003924, GO:0005525, GO:0003924, GO:0005525, GO:0005525, GO:0005525, GO:0005525, GO:0005525, GO:0003746, GO:0005525, GO:0005622, GO:0006414	Reactome: R-HSA-5389840
NC_008261.1_0_67	195103.CPF_0075	1.2e-38	165.2	Clostridiaceae													Bacteria	1UQVP@1239,24V2C@186801,2BB5I@1,324N2@2,36P51@31979	NA|NA|NA			NA	NA	NA	NA	NA	NA	NA
NC_008261.1_0_68	195103.CPF_0076	9.6e-172	609.4	Clostridiaceae	glcK		2.7.1.2	ko:K00845	ko00010,ko00052,ko00500,ko00520,ko00521,ko00524,ko01100,ko01110,ko01120,ko01130,ko01200,map00010,map00052,map00500,map00520,map00521,map00524,map01100,map01110,map01120,map01130,map01200	M00001,M00549	R00299,R01600,R01786	RC00002,RC00017	ko00000,ko00001,ko00002,ko01000			iHN637.CLJU_RS10220	Bacteria	1TPKW@1239,248U9@186801,36ESA@31979,COG1940@1,COG1940@2	NA|NA|NA	GK	ROK family	PANTHER, Gene3D, Pfam, PANTHER, CDD, SUPERFAMILY, Gene3D	PTHR18964:SF156, G3DSA:3.30.420.40, PF00480, PTHR18964, cd00012, SSF53067, G3DSA:3.30.420.40	ROK family, NBD_sugar-kinase_HSP70_actin	IPR000600, IPR000600	ROK family, ROK family		Reactome: R-HSA-4085001|Reactome: R-HSA-4085011, Reactome: R-HSA-4085001|Reactome: R-HSA-4085011
NC_008261.1_0_69	195103.CPF_2955	2.4e-98	364.8	Clostridiaceae	hupH	GO:0000302,GO:0003674,GO:0003824,GO:0004601,GO:0005488,GO:0005506,GO:0006091,GO:0006950,GO:0006970,GO:0006979,GO:0008150,GO:0008152,GO:0009055,GO:0009056,GO:0009266,GO:0009268,GO:0009408,GO:0009409,GO:0009628,GO:0009636,GO:0009651,GO:0009987,GO:0010035,GO:0010446,GO:0016209,GO:0016491,GO:0016684,GO:0016692,GO:0016999,GO:0017001,GO:0017144,GO:0022900,GO:0033554,GO:0034599,GO:0034605,GO:0034614,GO:…		ko:K03618					ko00000				Bacteria	1TSUY@1239,248GY@186801,36EFS@31979,COG1592@1,COG1592@2,COG1773@1,COG1773@2	NA|NA|NA	C	Rubrerythrin	CDD, Pfam, CDD, Gene3D, SUPERFAMILY, ProSiteProfiles, Gene3D, ProSiteProfiles, SUPERFAMILY, PANTHER	cd00729, PF02915, cd01046, G3DSA:1.20.1260.10, SSF57802, PS50903, G3DSA:2.20.28.10, PS50905, SSF47240, PTHR43339	rubredoxin_SM, Rubrerythrin, Rubrerythrin_like, Rubredoxin-like domain profile., Ferritin-like diiron domain profile.	IPR003251, IPR012347, IPR024934, IPR009040, IPR009078	Rubrerythrin, Ferritin-like, Rubredoxin-like domain, Ferritin-like diiron domain, Ferritin-like superfamily	GO:0016491, GO:0046872, GO:0055114, GO:0005506
NC_008261.1_0_7	195103.CPF_0007	0	1500	Clostridiaceae	gyrA	GO:0000166,GO:0000287,GO:0003674,GO:0003824,GO:0003916,GO:0003918,GO:0005488,GO:0005524,GO:0005575,GO:0005618,GO:0005623,GO:0005886,GO:0006139,GO:0006259,GO:0006265,GO:0006725,GO:0006807,GO:0006996,GO:0008094,GO:0008144,GO:0008150,GO:0008152,GO:0009987,GO:0016020,GO:0016043,GO:0016462,GO:0016787,GO:0016817,GO:0016818,GO:0016853,GO:0016887,GO:0017076,GO:0017111,GO:0030312,GO:0030554,GO:0032553,GO:…	5.99.1.3	ko:K02469,ko:K02621					ko00000,ko01000,ko02048,ko03032,ko03036,ko03400				Bacteria	1TP2Z@1239,2482G@186801,36E5Z@31979,COG0188@1,COG0188@2	NA|NA|NA	L	A type II topoisomerase that negatively supercoils closed circular double-stranded (ds) DNA in an ATP-dependent manner to modulate DNA topology and maintain chromosomes in an underwound state. Negative supercoiling favors strand separation, and DNA replication, transcription, recombination and repair, all of which involve strand separation. Also able to catalyze the interconversion of other topol…	Hamap, Gene3D, Pfam, SMART, SUPERFAMILY, Gene3D, Coils, Gene3D, Pfam, Pfam, Pfam, Pfam, Pfam, Pfam, CDD, PANTHER, Gene3D, TIGRFAM, SUPERFAMILY, PANTHER	MF_01897, G3DSA:3.90.199.10, PF00521, SM00434, SSF56719, G3DSA:3.30.1360.40, Coil, G3DSA:2.120.10.90, PF03989, PF03989, PF03989, PF03989, PF03989, PF03989, cd00187, PTHR43493:SF5, G3DSA:1.10.268.10, TIGR01063, SSF101904, PTHR43493	DNA gyrase subunit A [gyrA]., DNA gyrase/topoisomerase IV, subunit A, DNA gyrase C-terminal domain, beta-propeller, DNA gyrase C-terminal domain, beta-propeller, DNA gyrase C-terminal domain, beta-propeller, DNA gyrase C-terminal domain, beta-propeller, DNA gyrase C-terminal domain, beta-propeller, DNA gyrase C-terminal domain, beta-propeller, TOP4c, gyrA: DNA gyrase, A subunit	IPR005743, IPR013758, IPR002205, IPR002205, IPR013760, IPR035516, IPR006691, IPR006691, IPR006691, IPR006691, IPR006691, IPR006691, IPR002205, IPR013757, IPR035516	DNA gyrase, subunit A, DNA topoisomerase, type IIA, subunit A/ C-terminal, alpha-beta, DNA topoisomerase, type IIA, subunit A/C-terminal, DNA topoisomerase, type IIA, subunit A/C-terminal, DNA topoisomerase, type IIA-like domain superfamily, DNA gyrase/topoisomerase IV, subunit A, C-terminal, DNA gyrase/topoisomerase IV, subunit A, C-terminal repeat, DNA gyrase/topoisomerase IV, subunit A, C-term…	GO:0003677, GO:0003918, GO:0005524, GO:0005694, GO:0006265, GO:0003677, GO:0003918, GO:0005524, GO:0006259, GO:0006265, GO:0003677, GO:0003918, GO:0005524, GO:0006265, GO:0003677, GO:0003918, GO:0005524, GO:0006265, GO:0003918, GO:0005524, GO:0003677, GO:0003916, GO:0005524, GO:0005694, GO:0006265, GO:0003677, GO:0003916, GO:0005524, GO:0005694, GO:0006265, GO:0003677, GO:0003916, GO:0005524, GO:…	Reactome: R-HSA-4615885, Reactome: R-HSA-4615885, Reactome: R-HSA-4615885, Reactome: R-HSA-4615885, Reactome: R-HSA-4615885, Reactome: R-HSA-4615885
NC_008261.1_0_70	195103.CPF_0078	2.2e-116	424.9	Clostridiaceae			5.4.2.11	ko:K01834	ko00010,ko00260,ko00680,ko01100,ko01110,ko01120,ko01130,ko01200,ko01230,ko04922,ko05230,map00010,map00260,map00680,map01100,map01110,map01120,map01130,map01200,map01230,map04922,map05230	M00001,M00002,M00003	R01518	RC00536	ko00000,ko00001,ko00002,ko01000,ko04131,ko04147			iSB619.SA_RS02070	Bacteria	1V6ES@1239,24BUG@186801,36IHG@31979,COG0406@1,COG0406@2	NA|NA|NA	G	Belongs to the phosphoglycerate mutase family	PIRSF, SMART, SUPERFAMILY, Pfam, PANTHER, CDD, Gene3D	PIRSF000709, SM00855, SSF53254, PF00300, PTHR42725, cd07067, G3DSA:3.40.50.1240	Histidine phosphatase superfamily (branch 1), HP_PGM_like	IPR013078, IPR029033, IPR013078, IPR013078, IPR029033	Histidine phosphatase superfamily, clade-1, Histidine phosphatase superfamily, Histidine phosphatase superfamily, clade-1, Histidine phosphatase superfamily, clade-1, Histidine phosphatase superfamily
NC_008261.1_0_71	195103.CPF_0079	7.2e-141	506.5	Clostridiaceae	iolR			ko:K06608					ko00000,ko03000				Bacteria	1TTGR@1239,25C4C@186801,36WP8@31979,COG1349@1,COG1349@2	NA|NA|NA	K	DNA-binding protein	Pfam, PANTHER, SMART, Pfam, ProSiteProfiles, SUPERFAMILY, SMART, PRINTS, PRINTS, SUPERFAMILY, PANTHER, ProSitePatterns	PF08220, PTHR30363:SF40, SM01134, PF00455, PS51000, SSF46785, SM00420, PR00037, PR00037, SSF100950, PTHR30363, PS00894	DeoR-like helix-turn-helix domain, DeoR C terminal sensor domain, DeoR-type HTH domain profile., LacR bacterial regulatory protein HTH signature, LacR bacterial regulatory protein HTH signature, DeoR-type HTH domain signature.	IPR001034, IPR014036, IPR001034, IPR036390, IPR001034, IPR001034, IPR001034, IPR037171, IPR018356	DeoR-type HTH domain, DeoR C-terminal sensor domain, DeoR-type HTH domain, Winged helix DNA-binding domain superfamily, DeoR-type HTH domain, DeoR-type HTH domain, DeoR-type HTH domain, NagB/RpiA transferase-like, Transcription regulator, HTH DeoR-type, conserved site	GO:0003700, GO:0005622, GO:0006355, GO:0003700, GO:0005622, GO:0006355, GO:0003700, GO:0005622, GO:0006355, GO:0003700, GO:0005622, GO:0006355, GO:0003700, GO:0005622, GO:0006355, GO:0003700, GO:0006355
NC_008261.1_0_72	195103.CPF_0080	1.4e-212	745.3	Clostridiaceae	adhB		1.1.1.1,1.1.1.202	ko:K00001,ko:K00086	ko00010,ko00071,ko00350,ko00561,ko00625,ko00626,ko00640,ko00830,ko00980,ko00982,ko01100,ko01110,ko01120,ko01130,ko01220,map00010,map00071,map00350,map00561,map00625,map00626,map00640,map00830,map00980,map00982,map01100,map01110,map01120,map01130,map01220		R00623,R00754,R02124,R02377,R03119,R04805,R04880,R05233,R05234,R06917,R06927,R07105,R08281,R08306,R08310	RC00050,RC00087,RC00088,RC00099,RC00116,RC00649,RC01734,RC02273	ko00000,ko00001,ko01000				Bacteria	1TPB4@1239,247IQ@186801,36EAX@31979,COG1454@1,COG1454@2	NA|NA|NA	C	alcohol dehydrogenase	PANTHER, CDD, Coils, ProSitePatterns, Gene3D, Coils, SUPERFAMILY, Pfam, Gene3D	PTHR11496, cd08194, Coil, PS00913, G3DSA:3.40.50.1970, Coil, SSF56796, PF00465, G3DSA:1.20.1090.10	Fe-ADH6, Iron-containing alcohol dehydrogenases signature 1., Iron-containing alcohol dehydrogenase	IPR039697, IPR018211, IPR001670	Iron-type alcohol dehydrogenase-like, Alcohol dehydrogenase, iron-type, conserved site, Alcohol dehydrogenase, iron-type/glycerol dehydrogenase GldA	GO:0016491, GO:0046872, GO:0055114, GO:0016491, GO:0046872, GO:0055114	Reactome: R-HSA-880009, Reactome: R-HSA-880009
NC_008261.1_0_73	195103.CPF_0081	7.6e-152	543.1	Clostridiaceae	iolJ		4.1.2.13	ko:K01624	ko00010,ko00030,ko00051,ko00680,ko00710,ko01100,ko01110,ko01120,ko01130,ko01200,ko01230,map00010,map00030,map00051,map00680,map00710,map01100,map01110,map01120,map01130,map01200,map01230	M00001,M00003,M00165,M00167,M00344,M00345	R01068,R01070,R01829,R02568	RC00438,RC00439,RC00603,RC00604	ko00000,ko00001,ko00002,ko01000				Bacteria	1TRS4@1239,24CD4@186801,36E4S@31979,COG0191@1,COG0191@2	NA|NA|NA	G	aldolase	ProSitePatterns, CDD, TIGRFAM, Pfam, SUPERFAMILY, PANTHER, PIRSF, PANTHER, Gene3D	PS00806, cd00947, TIGR00167, PF01116, SSF51569, PTHR30304, PIRSF001359, PTHR30304:SF5, G3DSA:3.20.20.70	Fructose-bisphosphate aldolase class-II signature 2., TBP_aldolase_IIB, cbbA: ketose-bisphosphate aldolase, Fructose-bisphosphate aldolase class-II	IPR000771, IPR000771, IPR000771, IPR000771, IPR000771, IPR013785	Fructose-bisphosphate aldolase, class-II, Fructose-bisphosphate aldolase, class-II, Fructose-bisphosphate aldolase, class-II, Fructose-bisphosphate aldolase, class-II, Fructose-bisphosphate aldolase, class-II, Aldolase-type TIM barrel	GO:0005975, GO:0008270, GO:0016832, GO:0005975, GO:0008270, GO:0016832, GO:0005975, GO:0008270, GO:0016832, GO:0005975, GO:0008270, GO:0016832, GO:0005975, GO:0008270, GO:0016832, GO:0003824
NC_008261.1_0_74	195103.CPF_0082	2.5e-189	667.9	Clostridiaceae	iolC	GO:0003674,GO:0003824,GO:0005575,GO:0005622,GO:0005623,GO:0005737,GO:0005975,GO:0006629,GO:0006644,GO:0006793,GO:0006796,GO:0008150,GO:0008152,GO:0009056,GO:0009395,GO:0009987,GO:0016042,GO:0016301,GO:0016310,GO:0016740,GO:0016772,GO:0019200,GO:0019637,GO:0044237,GO:0044238,GO:0044242,GO:0044248,GO:0044255,GO:0044262,GO:0044424,GO:0044464,GO:0046434,GO:0046835,GO:0071704,GO:1901575	2.7.1.92	ko:K03338	ko00562,ko01100,ko01120,map00562,map01100,map01120		R05661	RC00002,RC00017	ko00000,ko00001,ko01000			iYO844.BSU39740	Bacteria	1TPGM@1239,247M1@186801,36W7D@31979,COG0524@1,COG0524@2	NA|NA|NA	G	Catalyzes the phosphorylation of 5-dehydro-2-deoxy-D- gluconate (2-deoxy-5-keto-D-gluconate or DKG) to 6-phospho-5- dehydro-2-deoxy-D-gluconate (DKGP)	SUPERFAMILY, Pfam, Hamap, Gene3D, PANTHER, Gene3D, TIGRFAM, PANTHER, ProSitePatterns, CDD	SSF53613, PF00294, MF_01668, G3DSA:3.40.1190.20, PTHR10584, G3DSA:2.20.150.10, TIGR04382, PTHR10584:SF194, PS00584, cd01166	pfkB family carbohydrate kinase, 5-dehydro-2-deoxygluconokinase [iolC]., myo_inos_iolC_N: 5-dehydro-2-deoxygluconokinase, pfkB family of carbohydrate kinases signature 2., KdgK	IPR029056, IPR011611, IPR022841, IPR029056, IPR023314, IPR030830, IPR002173	Ribokinase-like, Carbohydrate kinase PfkB, 5-dehydro-2-deoxygluconokinase, Firmicutes, Ribokinase-like, 5-Dehydro-2-deoxygluconokinase-like superfamily, 5-Dehydro-2-deoxygluconokinase, Carbohydrate/puine kinase, PfkB, conserved site	GO:0016310, GO:0047590, GO:0016773	KEGG: 00562+2.7.1.92, KEGG: 00562+2.7.1.92, KEGG: 00562+2.7.1.92
NC_008261.1_0_75	195103.CPF_0083	3e-147	527.7	Clostridiaceae	iolCB		2.7.1.92,5.3.1.30	ko:K03337,ko:K03338	ko00562,ko01100,ko01120,map00562,map01100,map01120		R05661,R08503	RC00002,RC00017,RC00541	ko00000,ko00001,ko01000				Bacteria	1TR6M@1239,2491W@186801,36FS1@31979,COG3718@1,COG3718@2	NA|NA|NA	G	Myo-inositol catabolism protein IolB	SUPERFAMILY, Pfam, PANTHER, PIRSF, Gene3D, Gene3D, Coils	SSF51182, PF04962, PTHR39193, PIRSF036628, G3DSA:2.60.120.10, G3DSA:2.60.120.10, Coil	KduI/IolB family	IPR011051, IPR021120, IPR024203, IPR024203, IPR014710, IPR014710	RmlC-like cupin domain superfamily, KduI/IolB isomerase, 5-deoxy-glucuronate isomerase, IolB, 5-deoxy-glucuronate isomerase, IolB, RmlC-like jelly roll fold, RmlC-like jelly roll fold	GO:0016861, GO:0008880, GO:0019310, GO:0008880, GO:0019310	KEGG: 00040+5.3.1.17|MetaCyc: PWY-6507, KEGG: 00562+5.3.1.30, KEGG: 00562+5.3.1.30
NC_008261.1_0_76	195103.CPF_0084	0	1263.4	Clostridiaceae	iolD	GO:0006629,GO:0006644,GO:0006793,GO:0006796,GO:0008150,GO:0008152,GO:0009056,GO:0009395,GO:0009987,GO:0016042,GO:0019637,GO:0044237,GO:0044238,GO:0044242,GO:0044248,GO:0044255,GO:0046434,GO:0071704,GO:1901575	3.7.1.22	ko:K03336	ko00562,ko01100,ko01120,map00562,map01100,map01120		R08603	RC02331	ko00000,ko00001,ko01000			iYO844.BSU39730	Bacteria	1UI18@1239,25EA8@186801,36UJU@31979,COG3962@1,COG3962@2	NA|NA|NA	E	Involved in the cleavage of the C1-C2 bond of 3D- (3,5 4)-trihydroxycyclohexane-1,2-dione (THcHDO) to yield 5-deoxy- glucuronate (5DG)	SUPERFAMILY, CDD, SUPERFAMILY, Coils, Gene3D, Pfam, Gene3D, Hamap, TIGRFAM, PANTHER, PANTHER, ProSitePatterns, Gene3D, Pfam, SUPERFAMILY, Pfam, CDD	SSF52467, cd07035, SSF52518, Coil, G3DSA:3.40.50.970, PF02775, G3DSA:3.40.50.970, MF_01669, TIGR04377, PTHR18968, PTHR18968:SF9, PS00187, G3DSA:3.40.50.1220, PF02776, SSF52518, PF00205, cd02003	TPP_PYR_POX_like, Thiamine pyrophosphate enzyme, C-terminal TPP binding domain, 3D-(3,5/4)-trihydroxycyclohexane-1,2-dione hydrolase [iolD]., myo_inos_iolD: 3,5/4-trihydroxycyclohexa-1,2-dione hydrolase, Thiamine pyrophosphate enzymes signature., Thiamine pyrophosphate enzyme, N-terminal TPP binding domain, Thiamine pyrophosphate enzyme, central domain, TPP_IolD	IPR029035, IPR029061, IPR011766, IPR023757, IPR030817, IPR030817, IPR000399, IPR012001, IPR029061, IPR012000	DHS-like NAD/FAD-binding domain superfamily, Thiamin diphosphate-binding fold, Thiamine pyrophosphate enzyme, C-terminal TPP-binding, 3D-(3,5/4)-trihydroxycyclohexane-1,2-dione hydrolase, Firmicutes, 3,5/4-Trihydroxycyclohexa-1,2-dione hydrolase, 3,5/4-Trihydroxycyclohexa-1,2-dione hydrolase, TPP-binding enzyme, conserved site, Thiamine pyrophosphate enzyme, N-terminal TPP-binding domain, Thiamin…	GO:0003824, GO:0030976, GO:0000287, GO:0016787, GO:0019310, GO:0030976, GO:0016823, GO:0019310, GO:0030976, GO:0016823, GO:0019310, GO:0030976, GO:0000287, GO:0030976, GO:0030976, GO:0000287, GO:0030976	KEGG: 00562+3.7.1.22, KEGG: 00562+3.7.1.22, KEGG: 00562+3.7.1.22
NC_008261.1_0_77	195103.CPF_0085	3.5e-188	664.1	Clostridiaceae	iolG		1.1.1.18,1.1.1.369	ko:K00010	ko00521,ko00562,ko01100,ko01120,ko01130,map00521,map00562,map01100,map01120,map01130		R01183,R09951	RC00182	ko00000,ko00001,ko01000				Bacteria	1TP83@1239,24B6F@186801,36F67@31979,COG0673@1,COG0673@2	NA|NA|NA	S	Oxidoreductase family, C-terminal alpha/beta domain	TIGRFAM, PANTHER, Pfam, Gene3D, PANTHER, SUPERFAMILY, Pfam, Gene3D, SUPERFAMILY	TIGR04380, PTHR42840, PF01408, G3DSA:3.30.360.10, PTHR42840:SF1, SSF51735, PF02894, G3DSA:3.40.50.720, SSF55347	myo_inos_iolG: inositol 2-dehydrogenase, Oxidoreductase family, NAD-binding Rossmann fold, Oxidoreductase family, C-terminal alpha/beta domain	IPR030827, IPR000683, IPR036291, IPR004104	Inositol 2-dehydrogenase, Oxidoreductase, N-terminal, NAD(P)-binding domain superfamily, Oxidoreductase, C-terminal	GO:0016491, GO:0016491, GO:0055114
NC_008261.1_0_78	195103.CPF_0086	1.8e-167	595.1	Clostridiaceae	iolE		4.2.1.44	ko:K03335	ko00562,ko01100,ko01120,map00562,map01100,map01120		R02782,R05659	RC00782,RC01448	ko00000,ko00001,ko01000				Bacteria	1TPZ2@1239,24AF7@186801,36GBX@31979,COG1082@1,COG1082@2	NA|NA|NA	G	Catalyzes the dehydration of inosose (2-keto-myo- inositol, 2KMI or 2,4,6 3,5-pentahydroxycyclohexanone) to 3D- (3,5 4)-trihydroxycyclohexane-1,2-dione (D-2,3-diketo-4-deoxy-epi- inositol)	TIGRFAM, Hamap, Gene3D, PANTHER, PANTHER, Pfam, SUPERFAMILY	TIGR04379, MF_01672, G3DSA:3.20.20.150, PTHR12110:SF4, PTHR12110, PF01261, SSF51658	myo_inos_iolE: myo-inosose-2 dehydratase, Inosose dehydratase [iolE]., Xylose isomerase-like TIM barrel	IPR030823, IPR023952, IPR013022, IPR036237	IolE/MocC family, Inosose dehydratase, Xylose isomerase-like, TIM barrel domain, Xylose isomerase-like superfamily	GO:0019310, GO:0030145, GO:0050114	KEGG: 00562+4.2.1.44, KEGG: 00562+4.2.1.44
NC_008261.1_0_79	195103.CPF_0087	8e-288	995.7	Clostridiaceae	yidK	GO:0003674,GO:0005215,GO:0005575,GO:0005623,GO:0005886,GO:0005887,GO:0006810,GO:0008150,GO:0015291,GO:0015293,GO:0016020,GO:0016021,GO:0022804,GO:0022857,GO:0031224,GO:0031226,GO:0044425,GO:0044459,GO:0044464,GO:0051179,GO:0051234,GO:0055085,GO:0071944		ko:K03307					ko00000	2.A.21		iECIAI1_1343.ECIAI1_3857,iECO111_1330.ECO111_4504,iECO26_1355.ECO26_4903,iECSE_1348.ECSE_3965,iECW_1372.ECW_m3979,iEKO11_1354.EKO11_0023,iEcE24377_1341.EcE24377A_4187,iWFL_1372.ECW_m3979	Bacteria	1UHPR@1239,24QXT@186801,36FAM@31979,COG4146@1,COG4146@2	NA|NA|NA	S	Belongs to the sodium solute symporter (SSF) (TC 2.A.21) family	PANTHER, PANTHER, ProSiteProfiles, Gene3D, TIGRFAM, CDD, Pfam	PTHR11819:SF171, PTHR11819, PS50283, G3DSA:1.20.1730.10, TIGR00813, cd10328, PF00474	Sodium:solute symporter family profile., sss: transporter, solute:sodium symporter (SSS) family, SLC5sbd_YidK, Sodium:solute symporter family	IPR001734, IPR038377, IPR001734, IPR001734	Sodium/solute symporter, Sodium/glucose symporter superfamily, Sodium/solute symporter, Sodium/solute symporter	GO:0016020, GO:0022857, GO:0055085, GO:0016020, GO:0022857, GO:0055085, GO:0016020, GO:0022857, GO:0055085
NC_008261.1_0_8	195103.CPF_0010	1.7e-88	332	Clostridiaceae				ko:K07012					ko00000,ko01000,ko02048				Bacteria	1VEWH@1239,24J88@186801,36JKQ@31979,COG2206@1,COG2206@2	NA|NA|NA	T	HD domain	SUPERFAMILY, Pfam, Gene3D	SSF109604, PF01966, G3DSA:1.10.3210.10	HD domain	IPR006674	HD domain
NC_008261.1_0_80	195103.CPF_0088	2e-202	711.4	Clostridiaceae	iolG2		1.1.1.18,1.1.1.369	ko:K00010	ko00521,ko00562,ko01100,ko01120,ko01130,map00521,map00562,map01100,map01120,map01130		R01183,R09951	RC00182	ko00000,ko00001,ko01000				Bacteria	1TP83@1239,248XQ@186801,36H58@31979,COG0673@1,COG0673@2	NA|NA|NA	S	Oxidoreductase family, C-terminal alpha/beta domain	PANTHER, SUPERFAMILY, Pfam, SUPERFAMILY, PANTHER, Pfam, Gene3D, PRINTS, PRINTS, PRINTS, Gene3D	PTHR42840:SF3, SSF51735, PF01408, SSF55347, PTHR42840, PF02894, G3DSA:3.30.360.10, PR01775, PR01775, PR01775, G3DSA:3.40.50.720	Oxidoreductase family, NAD-binding Rossmann fold, Oxidoreductase family, C-terminal alpha/beta domain, Bacterial glucose-fructose oxidoreductase signature, Bacterial glucose-fructose oxidoreductase signature, Bacterial glucose-fructose oxidoreductase signature	IPR036291, IPR000683, IPR004104, IPR008354, IPR008354, IPR008354	NAD(P)-binding domain superfamily, Oxidoreductase, N-terminal, Oxidoreductase, C-terminal, Glucose-fructose oxidoreductase, bacterial, Glucose-fructose oxidoreductase, bacterial, Glucose-fructose oxidoreductase, bacterial	GO:0016491, GO:0016491, GO:0055114	MetaCyc: PWY-5530, MetaCyc: PWY-5530, MetaCyc: PWY-5530
NC_008261.1_0_81	195103.CPF_0089	7.8e-132	476.5	Clostridiaceae	nirC	GO:0005575,GO:0005623,GO:0005886,GO:0005887,GO:0016020,GO:0016021,GO:0031224,GO:0031226,GO:0044425,GO:0044459,GO:0044464,GO:0071944		ko:K02598,ko:K06212,ko:K21993					ko00000,ko02000	1.A.16.1.1,1.A.16.1.3,1.A.16.2,1.A.16.3		iSF_1195.SF3386,iS_1188.S4377	Bacteria	1TRTT@1239,24BU5@186801,36F4N@31979,COG2116@1,COG2116@2	NA|NA|NA	P	Formate nitrite	PANTHER, Pfam, PANTHER, Gene3D	PTHR30520:SF5, PF01226, PTHR30520, G3DSA:1.20.1080.10	Formate/nitrite transporter	IPR000292, IPR000292, IPR023271	Formate/nitrite transporter, Formate/nitrite transporter, Aquaporin-like	GO:0016020, GO:0022857, GO:0055085, GO:0016020, GO:0022857, GO:0055085	Reactome: R-HSA-432047
NC_008261.1_0_82	195103.CPF_0090	3.7e-137	494.2	Clostridiaceae	crt		4.2.1.17	ko:K01715	ko00650,ko01200,map00650,map01200		R03026	RC00831	ko00000,ko00001,ko01000				Bacteria	1TQ89@1239,247RK@186801,36EDS@31979,COG1024@1,COG1024@2	NA|NA|NA	I	Belongs to the enoyl-CoA hydratase isomerase family	SUPERFAMILY, CDD, ProSitePatterns, Pfam, PANTHER, Gene3D, PANTHER, Gene3D	SSF52096, cd06558, PS00166, PF00378, PTHR11941:SF54, G3DSA:3.90.226.10, PTHR11941, G3DSA:1.10.12.10	crotonase-like, Enoyl-CoA hydratase/isomerase signature., Enoyl-CoA hydratase/isomerase	IPR029045, IPR018376, IPR001753, IPR014748	ClpP/crotonase-like domain superfamily, Enoyl-CoA hydratase/isomerase, conserved site, Enoyl-CoA hydratase/isomerase, Enoyl-CoA hydratase, C-terminal	GO:0003824, GO:0003824
NC_008261.1_0_83	195103.CPF_0091	3.2e-289	1000.3	Clostridiaceae			2.8.3.1	ko:K01026	ko00620,ko00640,ko00643,ko01100,ko01120,map00620,map00640,map00643,map01100,map01120		R00928,R01449,R05508	RC00012,RC00014,RC00137	ko00000,ko00001,ko01000				Bacteria	1TP5H@1239,247ZG@186801,36DYM@31979,COG4670@1,COG4670@2	NA|NA|NA	I	Belongs to the 3-oxoacid CoA-transferase family	Gene3D, SMART, SMART, PANTHER, SUPERFAMILY, Pfam, PIRSF, Gene3D, SUPERFAMILY, PANTHER	G3DSA:3.40.1080.10, SM00882, SM00882, PTHR43293, SSF100950, PF01144, PIRSF000858, G3DSA:3.40.1080.10, SSF100950, PTHR43293:SF1	Coenzyme A transferase	IPR004165, IPR004165, IPR037171, IPR004165, IPR014388, IPR037171	Coenzyme A transferase family I, Coenzyme A transferase family I, NagB/RpiA transferase-like, Coenzyme A transferase family I, 3-oxoacid CoA-transferase, NagB/RpiA transferase-like	GO:0008410, GO:0008410, GO:0008410, GO:0008410, GO:0046952	Reactome: R-HSA-77108, Reactome: R-HSA-77108, Reactome: R-HSA-77108, Reactome: R-HSA-77108
NC_008261.1_0_84	195103.CPF_0092	4.5e-208	730.3	Clostridiaceae	bcd		1.3.8.1	ko:K00248	ko00071,ko00280,ko00650,ko01100,ko01110,ko01120,ko01200,ko01212,map00071,map00280,map00650,map01100,map01110,map01120,map01200,map01212		R01175,R01178,R02661,R03172,R04751	RC00052,RC00068,RC00076,RC00120,RC00148	ko00000,ko00001,ko01000				Bacteria	1TP57@1239,247UB@186801,36EV3@31979,COG1960@1,COG1960@2	NA|NA|NA	I	acyl-CoA dehydrogenase	Gene3D, Pfam, SUPERFAMILY, Pfam, Gene3D, SUPERFAMILY, PIRSF, PIRSF, PIRSF, Pfam, ProSitePatterns, ProSitePatterns, PANTHER, PANTHER, Gene3D	G3DSA:2.40.110.10, PF02770, SSF56645, PF02771, G3DSA:1.10.540.10, SSF47203, PIRSF016578, PIRSF016578, PIRSF016578, PF00441, PS00072, PS00073, PTHR43884, PTHR43884:SF12, G3DSA:1.20.140.10	Acyl-CoA dehydrogenase, middle domain, Acyl-CoA dehydrogenase, N-terminal domain, Acyl-CoA dehydrogenase, C-terminal domain, Acyl-CoA dehydrogenases signature 1., Acyl-CoA dehydrogenases signature 2.	IPR006091, IPR009100, IPR013786, IPR037069, IPR036250, IPR009075, IPR006089, IPR006089	Acyl-CoA oxidase/dehydrogenase, central domain, Acyl-CoA dehydrogenase/oxidase, N-terminal and middle domain superfamily, Acyl-CoA dehydrogenase/oxidase, N-terminal, Acyl-CoA dehydrogenase/oxidase, N-terminal domain superfamily, Acyl-CoA dehydrogenase-like, C-terminal, Acyl-CoA dehydrogenase/oxidase C-terminal, Acyl-CoA dehydrogenase, conserved site, Acyl-CoA dehydrogenase, conserved site	GO:0016627, GO:0055114, GO:0016627, GO:0055114, GO:0016627, GO:0050660, GO:0055114, GO:0016627, GO:0050660, GO:0055114, GO:0016627, GO:0055114, GO:0016627, GO:0055114, GO:0003995, GO:0055114, GO:0003995, GO:0055114
NC_008261.1_0_85	195103.CPF_0093	1.4e-59	235.3	Clostridiaceae				ko:K09004					ko00000				Bacteria	1VEYT@1239,24RMH@186801,36N3F@31979,COG1416@1,COG1416@2	NA|NA|NA	S	DsrE/DsrF-like family	Gene3D, PANTHER, Pfam, SUPERFAMILY, Coils	G3DSA:3.40.1260.10, PTHR37691, PF02635, SSF75169, Coil	DsrE/DsrF-like family	IPR027396, IPR003787, IPR027396	DsrEFH-like, Sulphur relay, DsrE/F-like protein, DsrEFH-like
NC_008261.1_0_86	195103.CPF_0094	3.5e-213	747.3	Clostridiaceae	gldA		1.1.1.6	ko:K00005	ko00561,ko00640,ko01100,map00561,map00640,map01100		R01034,R10715,R10717	RC00029,RC00117,RC00670	ko00000,ko00001,ko01000				Bacteria	1TQFU@1239,248KH@186801,36ED1@31979,COG0371@1,COG0371@2	NA|NA|NA	C	Dehydrogenase	SUPERFAMILY, Gene3D, ProSitePatterns, Gene3D, Pfam, CDD, PANTHER, PANTHER, PIRSF	SSF56796, G3DSA:1.20.1090.10, PS00913, G3DSA:3.40.50.1970, PF00465, cd08170, PTHR43616, PTHR43616:SF5, PIRSF000112	Iron-containing alcohol dehydrogenases signature 1., Iron-containing alcohol dehydrogenase, GlyDH	IPR018211, IPR001670, IPR016205, IPR016205	Alcohol dehydrogenase, iron-type, conserved site, Alcohol dehydrogenase, iron-type/glycerol dehydrogenase GldA, Glycerol dehydrogenase, Glycerol dehydrogenase	GO:0016491, GO:0046872, GO:0055114, GO:0016491, GO:0046872, GO:0055114, GO:0016614, GO:0046872, GO:0055114, GO:0016614, GO:0046872, GO:0055114	Reactome: R-HSA-880009, KEGG: 00564+1.1.1.261|MetaCyc: PWY-6349, KEGG: 00564+1.1.1.261|MetaCyc: PWY-6349
NC_008261.1_0_87	195103.CPF_0095	0	1137.9	Clostridiaceae	dhaK	GO:0003674,GO:0003824,GO:0005488,GO:0005515,GO:0005575,GO:0005622,GO:0005623,GO:0005737,GO:0005829,GO:0005975,GO:0005996,GO:0006066,GO:0006071,GO:0006793,GO:0006796,GO:0006950,GO:0006974,GO:0008150,GO:0008152,GO:0009056,GO:0009987,GO:0016052,GO:0016301,GO:0016310,GO:0016740,GO:0016772,GO:0016773,GO:0019400,GO:0019637,GO:0019751,GO:0033554,GO:0034308,GO:0042180,GO:0042182,GO:0042802,GO:0044237,GO:…	2.7.1.121,2.7.1.28,2.7.1.29,4.6.1.15	ko:K00863,ko:K05878,ko:K05879	ko00051,ko00561,ko00680,ko01100,ko01120,ko01200,ko04622,map00051,map00561,map00680,map01100,map01120,map01200,map04622	M00344	R01011,R01012,R01059	RC00002,RC00015,RC00017	ko00000,ko00001,ko00002,ko01000			iEcHS_1320.EcHS_A1304,iUMNK88_1353.UMNK88_1515,iYL1228.KPN_03495	Bacteria	1TP92@1239,2488D@186801,36E0T@31979,COG2376@1,COG2376@2	NA|NA|NA	G	Dihydroxyacetone kinase DhaK, subunit	TIGRFAM, Pfam, SUPERFAMILY, SUPERFAMILY, Pfam, Gene3D, ProSiteProfiles, PANTHER, PANTHER, SMART, ProSiteProfiles, Gene3D, Gene3D	TIGR02363, PF02733, SSF82549, SSF101473, PF02734, G3DSA:3.40.50.10440, PS51481, PTHR28629, PTHR28629:SF4, SM01120, PS51480, G3DSA:1.25.40.340, G3DSA:3.30.1180.20	dhaK1: dihydroxyacetone kinase, DhaK subunit, Dak1 domain, DAK2 domain, DhaK domain profile., DhaL domain profile.	IPR012736, IPR004006, IPR036117, IPR004007, IPR004006, IPR004007, IPR004007, IPR036117	Dihydroxyacetone kinase DhaK, subunit 1, DhaK domain, DhaL domain superfamily, DhaL domain, DhaK domain, DhaL domain, DhaL domain, DhaL domain superfamily	GO:0004371, GO:0006071, GO:0004371, GO:0006071, GO:0004371, GO:0006071, GO:0004371, GO:0006071, GO:0004371, GO:0006071, GO:0004371, GO:0006071, GO:0004371, GO:0006071	KEGG: 00561+2.7.1.121, Reactome: R-HSA-168928|Reactome: R-HSA-70350, Reactome: R-HSA-168928|Reactome: R-HSA-70350, Reactome: R-HSA-168928|Reactome: R-HSA-70350, Reactome: R-HSA-168928|Reactome: R-HSA-70350, Reactome: R-HSA-168928|Reactome: R-HSA-70350, Reactome: R-HSA-168928|Reactome: R-HSA-70350, Reactome: R-HSA-168928|Reactome: R-HSA-70350
NC_008261.1_0_88	195103.CPF_0096	1.2e-258	898.7	Clostridiaceae													Bacteria	1TPRN@1239,249RZ@186801,36E7S@31979,COG0477@1,COG2814@2	NA|NA|NA	EGP	Major facilitator Superfamily	ProSiteProfiles, PANTHER, PANTHER, PRINTS, PRINTS, PRINTS, PRINTS, PRINTS, CDD, Pfam, TIGRFAM, SUPERFAMILY, Gene3D, ProSiteProfiles, Gene3D	PS51257, PTHR23501:SF5, PTHR23501, PR01036, PR01036, PR01036, PR01036, PR01036, cd06174, PF07690, TIGR00711, SSF103473, G3DSA:1.20.1250.20, PS50850, G3DSA:1.20.1720.10	Prokaryotic membrane lipoprotein lipid attachment site profile., Tetracycline resistance protein TetB signature, Tetracycline resistance protein TetB signature, Tetracycline resistance protein TetB signature, Tetracycline resistance protein TetB signature, Tetracycline resistance protein TetB signature, MFS, Major Facilitator Superfamily, efflux_EmrB: drug resistance MFS transporter, drug:H+ anti…	IPR020846, IPR011701, IPR004638, IPR036259, IPR020846	Major facilitator superfamily domain, Major facilitator superfamily, Drug resistance transporter EmrB/QacA subfamily, MFS transporter superfamily, Major facilitator superfamily domain	GO:0016021, GO:0055085, GO:0016021, GO:0022857, GO:0055085
NC_008261.1_0_89	195103.CPF_0097	2.3e-17	94.7	Clostridiaceae													Bacteria	1URJY@1239,24X83@186801,2BMSI@1,32GBY@2,36PHH@31979	NA|NA|NA			Coils, Coils	Coil, Coil
NC_008261.1_0_9	195103.CPF_0011	0	1757.7	Clostridiaceae		GO:0005575,GO:0005576,GO:0005618,GO:0005623,GO:0005886,GO:0005887,GO:0016020,GO:0016021,GO:0030312,GO:0031224,GO:0031226,GO:0044425,GO:0044459,GO:0044464,GO:0071944		ko:K09118					ko00000				Bacteria	1TQHM@1239,248PM@186801,36DY1@31979,COG1615@1,COG1615@2	NA|NA|NA	S	UPF0182 protein	MobiDBLite, PANTHER, PANTHER, Hamap, MobiDBLite, Pfam	mobidb-lite, PTHR39344, PTHR39344, MF_01600, mobidb-lite, PF03699	consensus disorder prediction, UPF0182 protein <locus_tag>., consensus disorder prediction, Uncharacterised protein family (UPF0182)	IPR005372, IPR005372, IPR005372, IPR005372	Uncharacterised protein family UPF0182, Uncharacterised protein family UPF0182, Uncharacterised protein family UPF0182, Uncharacterised protein family UPF0182	GO:0016021, GO:0016021, GO:0016021, GO:0016021
NC_008261.1_0_90	195103.CPF_0098	1.4e-170	605.5	Clostridiaceae	ldh		1.1.1.27	ko:K00016	ko00010,ko00270,ko00620,ko00640,ko01100,ko01110,ko01120,ko01130,ko04922,map00010,map00270,map00620,map00640,map01100,map01110,map01120,map01130,map04922		R00703,R01000,R03104	RC00031,RC00044	ko00000,ko00001,ko01000,ko04147				Bacteria	1TPSY@1239,248DH@186801,36DD8@31979,COG0039@1,COG0039@2	NA|NA|NA	C	Belongs to the LDH MDH superfamily. LDH family	SUPERFAMILY, SUPERFAMILY, PANTHER, ProSitePatterns, PRINTS, PRINTS, PRINTS, PRINTS, PRINTS, Gene3D, CDD, Gene3D, TIGRFAM, PIRSF, PANTHER, Pfam, Pfam, Hamap	SSF51735, SSF56327, PTHR43128:SF7, PS00064, PR00086, PR00086, PR00086, PR00086, PR00086, G3DSA:3.90.110.10, cd05292, G3DSA:3.40.50.720, TIGR01771, PIRSF000102, PTHR43128, PF02866, PF00056, MF_00488	L-lactate dehydrogenase active site., L-lactate dehydrogenase signature, L-lactate dehydrogenase signature, L-lactate dehydrogenase signature, L-lactate dehydrogenase signature, L-lactate dehydrogenase signature, LDH_2, L-LDH-NAD: L-lactate dehydrogenase, lactate/malate dehydrogenase, alpha/beta C-terminal domain, lactate/malate dehydrogenase, NAD binding domain, L-lactate dehydrogenase [ldh].	IPR036291, IPR015955, IPR018177, IPR001557, IPR001557, IPR001557, IPR001557, IPR001557, IPR015955, IPR011304, IPR001557, IPR022383, IPR001236, IPR011304	NAD(P)-binding domain superfamily, Lactate dehydrogenase/glycoside hydrolase, family 4, C-terminal, L-lactate dehydrogenase, active site, L-lactate/malate dehydrogenase, L-lactate/malate dehydrogenase, L-lactate/malate dehydrogenase, L-lactate/malate dehydrogenase, L-lactate/malate dehydrogenase, Lactate dehydrogenase/glycoside hydrolase, family 4, C-terminal, L-lactate dehydrogenase, L-lactate/m…	GO:0003824, GO:0005975, GO:0016616, GO:0055114, GO:0004459, GO:0055114, GO:0016616, GO:0019752, GO:0055114, GO:0016616, GO:0019752, GO:0055114, GO:0016616, GO:0019752, GO:0055114, GO:0016616, GO:0019752, GO:0055114, GO:0016616, GO:0019752, GO:0055114, GO:0003824, GO:0005975, GO:0016616, GO:0055114, GO:0004459, GO:0005737, GO:0055114, GO:0016616, GO:0019752, GO:0055114, GO:0016616, GO:0055114, GO:…	KEGG: 00010+1.1.1.27|KEGG: 00270+1.1.1.27|KEGG: 00620+1.1.1.27|KEGG: 00640+1.1.1.27|MetaCyc: PWY-5481|MetaCyc: PWY-6901|Reactome: R-HSA-70268, KEGG: 00010+1.1.1.27|KEGG: 00270+1.1.1.27|KEGG: 00620+1.1.1.27|KEGG: 00640+1.1.1.27|MetaCyc: PWY-5481|MetaCyc: PWY-6901|Reactome: R-HSA-70268, KEGG: 00010+1.1.1.27|KEGG: 00270+1.1.1.27|KEGG: 00620+1.1.1.27|KEGG: 00640+1.1.1.27|MetaCyc: PWY-5481|MetaCyc: PW…
NC_008261.1_0_91	NA	NA	NA	NA	NA	NA	NA	NA	NA	NA	NA	NA	NA	NA	NA	NA	NA	NA	NA	NA	NA	ProSiteProfiles	PS51257	Prokaryotic membrane lipoprotein lipid attachment site profile.
NC_008261.1_0_93	195103.CPF_0101	1.3e-123	449.1	Clostridiaceae													Bacteria	1VB3B@1239,24N6Q@186801,36NVN@31979,COG5523@1,COG5523@2	NA|NA|NA	S	Protein of unknown function (DUF975)	PANTHER, Pfam	PTHR40076, PF06161	Protein of unknown function (DUF975)	IPR010380, IPR010380	Protein of unknown function DUF975, Protein of unknown function DUF975
NC_008261.1_0_94	195103.CPF_0102	2.9e-146	524.6	Clostridiaceae													Bacteria	1VB3B@1239,24N6Q@186801,36NVN@31979,COG5523@1,COG5523@2	NA|NA|NA	S	Protein of unknown function (DUF975)	Coils, Pfam	Coil, PF06161	Protein of unknown function (DUF975)	IPR010380	Protein of unknown function DUF975
NC_008261.1_0_95	195103.CPF_0103	1.8e-245	854.7	Clostridiaceae	hydF												Bacteria	1UI84@1239,25EDI@186801,36UM4@31979,COG1160@1,COG1160@2	NA|NA|NA	S	small GTP-binding protein	Gene3D, Pfam, TIGRFAM, PANTHER, SUPERFAMILY, Gene3D, PANTHER, PANTHER, Gene3D, CDD, PANTHER	G3DSA:3.40.50.11420, PF01926, TIGR00231, PTHR42714:SF6, SSF52540, G3DSA:3.40.50.300, PTHR42714, PTHR42714, G3DSA:3.40.50.11410, cd00880, PTHR42714:SF6	50S ribosome-binding GTPase, small_GTP: small GTP-binding protein domain, Era_like	IPR006073, IPR005225, IPR027417	GTP binding domain, Small GTP-binding protein domain, P-loop containing nucleoside triphosphate hydrolase	GO:0005525, GO:0005525
NC_008261.1_0_97	195103.CPF_0106	3.8e-265	920.2	Clostridiaceae	hydG		4.1.99.19	ko:K03150	ko00730,ko01100,map00730,map01100		R10246	RC01434,RC03095	ko00000,ko00001,ko01000				Bacteria	1TPEX@1239,248PF@186801,36F0H@31979,COG0502@1,COG0502@2	NA|NA|NA	C	biosynthesis protein ThiH	PANTHER, SMART, SFLD, SFLD, TIGRFAM, Coils, Pfam, SUPERFAMILY, Gene3D, PANTHER, SMART, CDD, Pfam	PTHR43583:SF2, SM00729, SFLDG01081, SFLDF00319, TIGR03955, Coil, PF06968, SSF102114, G3DSA:3.20.20.70, PTHR43583, SM00876, cd01335, PF04055	cleavage of the Ca-Cb bond in aromatic amino acids, [Fe] hydrogenase maturase (HydG-like), rSAM_HydG: [FeFe] hydrogenase H-cluster radical SAM maturase HydG, Biotin and Thiamin Synthesis associated domain, Radical_SAM, Radical SAM superfamily	IPR024007, IPR006638, IPR034428, IPR024007, IPR024007, IPR010722, IPR013785, IPR010722, IPR007197	[FeFe]-hydrogenase maturation HydG, radical SAM, Elp3/MiaB/NifB, ThiH/NosL/HydG-like, [FeFe]-hydrogenase maturation HydG, radical SAM, [FeFe]-hydrogenase maturation HydG, radical SAM, Biotin and thiamin synthesis-associated domain, Aldolase-type TIM barrel, Biotin and thiamin synthesis-associated domain, Radical SAM	GO:0003824, GO:0051536, GO:0003824, GO:0003824, GO:0051536	KEGG: 00730+4.1.99.19|MetaCyc: PWY-6892, KEGG: 00780+2.8.1.6|MetaCyc: PWY-7380, KEGG: 00780+2.8.1.6|MetaCyc: PWY-7380
NC_008261.1_0_98	195103.CPF_0107	6.5e-35	152.9	Clostridiaceae	nikR	GO:0000976,GO:0000984,GO:0000985,GO:0001017,GO:0001046,GO:0001047,GO:0001067,GO:0001130,GO:0001217,GO:0003674,GO:0003676,GO:0003677,GO:0003690,GO:0003700,GO:0005488,GO:0005515,GO:0005575,GO:0006355,GO:0008150,GO:0009889,GO:0009890,GO:0009892,GO:0009987,GO:0010468,GO:0010556,GO:0010558,GO:0010605,GO:0010629,GO:0016043,GO:0016151,GO:0019219,GO:0019222,GO:0022607,GO:0031323,GO:0031324,GO:0031326,GO:…		ko:K07722					ko00000,ko03000				Bacteria	1VF9M@1239,24QVJ@186801,36N04@31979,COG0864@1,COG0864@2	NA|NA|NA	K	Iron-only hydrogenase system regulator	Gene3D, TIGRFAM, SUPERFAMILY	G3DSA:3.30.70.1150, TIGR03959, SSF55021	hyd_TM1266: putative iron-only hydrogenase system regulator	IPR027271, IPR023860	Acetolactate synthase/Transcription factor NikR, C-terminal, [FeFe]-hydrogenase system regulator TM1266
NC_008261.1_0_99	195103.CPF_0108	2.5e-209	734.9	Clostridiaceae	ypuA												Bacteria	1TR2I@1239,24C10@186801,36DKY@31979,COG4086@1,COG4086@2	NA|NA|NA	S	hmm pf06207	MobiDBLite, Coils, Coils, Pfam, MobiDBLite, MobiDBLite, MobiDBLite, MobiDBLite, MobiDBLite	mobidb-lite, Coil, Coil, PF06207, mobidb-lite, mobidb-lite, mobidb-lite, mobidb-lite, mobidb-lite	consensus disorder prediction, Protein of unknown function (DUF1002), consensus disorder prediction, consensus disorder prediction, consensus disorder prediction, consensus disorder prediction, consensus disorder prediction	IPR009343	Protein of unknown function DUF1002
NC_008261.1_1_1	195103.CPF_0122	2.6e-89	334.7	Firmicutes				ko:K12287					ko00000,ko02044				Bacteria	1TQ59@1239,COG4932@1,COG4932@2	NA|NA|NA	M	domain protein	NA	NA	NA	NA	NA	NA	NA
NC_008261.1_10_1	195103.CPF_0122	1.1e-09	67.8	Firmicutes				ko:K12287					ko00000,ko02044				Bacteria	1TQ59@1239,COG4932@1,COG4932@2	NA|NA|NA	M	domain protein	NA	NA	NA	NA	NA	NA	NA
NC_008261.1_100_1	NA	NA	NA	NA	NA	NA	NA	NA	NA	NA	NA	NA	NA	NA	NA	NA	NA	NA	NA	NA	NA	Coils	Coil
NC_008261.1_101_1	195103.CPF_1570	4.8e-32	143.3	Clostridiaceae													Bacteria	1VI7G@1239,24R3E@186801,2ED46@1,3370Y@2,36MYT@31979	NA|NA|NA	S	Haemolysin XhlA	Pfam, Coils	PF10779, Coil	Haemolysin XhlA	IPR019715	Haemolysin XhlA
NC_008261.1_102_1	195103.CPF_1572	1.9e-08	63.5	Clostridiaceae													Bacteria	1UIRZ@1239,24KTD@186801,29WR5@1,30IC5@2,36K9B@31979	NA|NA|NA			NA	NA	NA	NA	NA	NA	NA
NC_008261.1_103_1	NA	NA	NA	NA	NA	NA	NA	NA	NA	NA	NA	NA	NA	NA	NA	NA	NA	NA	NA	NA	NA	MobiDBLite, MobiDBLite, Coils	mobidb-lite, mobidb-lite, Coil	consensus disorder prediction, consensus disorder prediction
NC_008261.1_105_1	195103.CPF_1572	1.4e-20	104.8	Clostridiaceae													Bacteria	1UIRZ@1239,24KTD@186801,29WR5@1,30IC5@2,36K9B@31979	NA|NA|NA			NA	NA	NA	NA	NA	NA	NA
NC_008261.1_106_1	NA	NA	NA	NA	NA	NA	NA	NA	NA	NA	NA	NA	NA	NA	NA	NA	NA	NA	NA	NA	NA	SUPERFAMILY, Gene3D	SSF69360, G3DSA:2.10.270.10
NC_008261.1_107_1	195103.CPF_1573	1.5e-12	77.4	Bacteria	cbpE												Bacteria	COG2333@1,COG2333@2	NA|NA|NA	N	competence protein COMEC	NA	NA	NA	NA	NA	NA	NA
NC_008261.1_108_1	195103.CPF_1573	1.6e-17	94.4	Bacteria	cbpE												Bacteria	COG2333@1,COG2333@2	NA|NA|NA	N	competence protein COMEC	NA	NA	NA	NA	NA	NA	NA
NC_008261.1_109_1	1187894.I2E8W3_9CAUD	3.6e-23	113.2	Siphoviridae		GO:0005575,GO:0008150,GO:0016032,GO:0018995,GO:0019012,GO:0019058,GO:0019062,GO:0022610,GO:0033643,GO:0033644,GO:0043657,GO:0044215,GO:0044216,GO:0044217,GO:0044218,GO:0044228,GO:0044279,GO:0044403,GO:0044406,GO:0044419,GO:0044423,GO:0044650,GO:0051704,GO:0098015,GO:0098024											Viruses	4QAK6@10239,4QKKV@10699,4QPBY@28883,4QUP9@35237	NA|NA|NA	S	peptidoglycan catabolic process	Gene3D, SUPERFAMILY	G3DSA:2.70.70.10, SSF51261		IPR011055, IPR011055	Duplicated hybrid motif, Duplicated hybrid motif
NC_008261.1_11_1	195103.CPF_0122	1.3e-41	175.3	Firmicutes				ko:K12287					ko00000,ko02044				Bacteria	1TQ59@1239,COG4932@1,COG4932@2	NA|NA|NA	M	domain protein	NA	NA	NA	NA	NA	NA	NA
NC_008261.1_110_1	195103.CPF_1574	3.4e-08	62.8	Clostridiaceae				ko:K06386,ko:K19304,ko:K21471					ko00000,ko01000,ko01002,ko01011	1.A.34.1.1			Bacteria	1UZUG@1239,25B8B@186801,36WB7@31979,COG0739@1,COG0739@2,COG4926@1,COG4926@2	NA|NA|NA	M	Prophage endopeptidase tail	NA	NA	NA	NA	NA	NA	NA
NC_008261.1_111_1	195103.CPF_1574	5.1e-40	169.9	Clostridiaceae				ko:K06386,ko:K19304,ko:K21471					ko00000,ko01000,ko01002,ko01011	1.A.34.1.1			Bacteria	1UZUG@1239,25B8B@186801,36WB7@31979,COG0739@1,COG0739@2,COG4926@1,COG4926@2	NA|NA|NA	M	Prophage endopeptidase tail	NA	NA	NA	NA	NA	NA	NA
NC_008261.1_112_1	195103.CPF_1574	1.9e-18	97.4	Clostridiaceae				ko:K06386,ko:K19304,ko:K21471					ko00000,ko01000,ko01002,ko01011	1.A.34.1.1			Bacteria	1UZUG@1239,25B8B@186801,36WB7@31979,COG0739@1,COG0739@2,COG4926@1,COG4926@2	NA|NA|NA	M	Prophage endopeptidase tail	NA	NA	NA	NA	NA	NA	NA
NC_008261.1_113_1	195103.CPF_1574	3.4e-21	106.7	Clostridiaceae				ko:K06386,ko:K19304,ko:K21471					ko00000,ko01000,ko01002,ko01011	1.A.34.1.1			Bacteria	1UZUG@1239,25B8B@186801,36WB7@31979,COG0739@1,COG0739@2,COG4926@1,COG4926@2	NA|NA|NA	M	Prophage endopeptidase tail	NA	NA	NA	NA	NA	NA	NA
NC_008261.1_114_1	195103.CPF_1575	3.3e-16	89.7	Clostridiaceae													Bacteria	1V8VY@1239,2494G@186801,36F4E@31979,COG4722@1,COG4722@2	NA|NA|NA	S	tail component	NA	NA	NA	NA	NA	NA	NA
NC_008261.1_115_1	195103.CPF_1576	2e-08	63.5	Clostridiaceae	wzc	GO:0000271,GO:0003674,GO:0003824,GO:0004672,GO:0004713,GO:0005488,GO:0005515,GO:0005575,GO:0005623,GO:0005886,GO:0005887,GO:0005975,GO:0005976,GO:0006464,GO:0006468,GO:0006793,GO:0006796,GO:0006807,GO:0008150,GO:0008152,GO:0009058,GO:0009059,GO:0009242,GO:0009987,GO:0016020,GO:0016021,GO:0016051,GO:0016301,GO:0016310,GO:0016462,GO:0016740,GO:0016772,GO:0016773,GO:0016787,GO:0016817,GO:0016818,GO:…		ko:K16692					ko00000,ko01000,ko01001				Bacteria	1TQ28@1239,247QT@186801,36E7F@31979,COG3206@1,COG3206@2,COG5283@1,COG5283@2,COG5412@1,COG5412@2	NA|NA|NA	M	tail tape measure protein	NA	NA	NA	NA	NA	NA	NA
NC_008261.1_117_1	195103.CPF_1582	1.2e-15	87.8	Clostridiaceae													Bacteria	1VMQA@1239,24X9Y@186801,2DTSG@1,33MGN@2,36P8C@31979	NA|NA|NA	S	Phage head-tail adaptor	NA	NA	NA	NA	NA	NA	NA
NC_008261.1_119_1	195103.CPF_1584	4.9e-24	116.3	Clostridiaceae													Bacteria	1UACS@1239,24F6V@186801,36GFW@31979,COG4653@1,COG4653@2	NA|NA|NA	S	Phage major capsid protein, HK97 family	TIGRFAM	TIGR01554	major_cap_HK97: phage major capsid protein, HK97 family	IPR024455	Phage capsid
NC_008261.1_12_1	195103.CPF_0122	3.4e-35	153.7	Firmicutes				ko:K12287					ko00000,ko02044				Bacteria	1TQ59@1239,COG4932@1,COG4932@2	NA|NA|NA	M	domain protein	PANTHER, Gene3D, SUPERFAMILY	PTHR36108, G3DSA:2.60.40.10, SSF49478		IPR013783	Immunoglobulin-like fold
NC_008261.1_120_1	195103.CPF_1584	1.4e-13	81.6	Clostridiaceae													Bacteria	1UACS@1239,24F6V@186801,36GFW@31979,COG4653@1,COG4653@2	NA|NA|NA	S	Phage major capsid protein, HK97 family	MobiDBLite, Coils	mobidb-lite, Coil	consensus disorder prediction
NC_008261.1_121_1	195103.CPF_1585	1e-102	379.4	Clostridiaceae				ko:K06904					ko00000				Bacteria	1VBG3@1239,25DIQ@186801,36IW7@31979,COG3740@1,COG3740@2	NA|NA|NA	S	Phage prohead protease, HK97 family	TIGRFAM, Pfam, Coils	TIGR01543, PF04586, Coil	proheadase_HK97: phage prohead protease, HK97 family, Caudovirus prohead serine protease	IPR006433, IPR006433	Prohead protease, Prohead protease
NC_008261.1_122_1	195103.CPF_1586	7.5e-13	78.6	Clostridiaceae													Bacteria	1TP8B@1239,2497C@186801,36H1A@31979,COG4695@1,COG4695@2	NA|NA|NA	S	Phage portal protein, HK97 family	NA	NA	NA	NA	NA	NA	NA
NC_008261.1_123_1	195103.CPF_1586	2.3e-22	110.5	Clostridiaceae													Bacteria	1TP8B@1239,2497C@186801,36H1A@31979,COG4695@1,COG4695@2	NA|NA|NA	S	Phage portal protein, HK97 family	NA	NA	NA	NA	NA	NA	NA
NC_008261.1_124_1	195103.CPF_1586	8.2e-14	81.6	Clostridiaceae													Bacteria	1TP8B@1239,2497C@186801,36H1A@31979,COG4695@1,COG4695@2	NA|NA|NA	S	Phage portal protein, HK97 family	Pfam	PF04860	Phage portal protein	IPR006944	Bacteriophage/Gene transfer agent portal protein
NC_008261.1_126_1	190478.Q8SBQ2_9CAUD	2.1e-22	110.9	Siphoviridae													Viruses	4QBV3@10239,4QKW5@10699,4QPPJ@28883,4QW0W@35237	NA|NA|NA	S	Phage Terminase	Pfam	PF03354	Phage Terminase	IPR005021	Terminase large subunit, Lambdalikevirus-type
NC_008261.1_127_1	195103.CPF_1587	3.7e-193	680.6	Clostridiaceae													Bacteria	1TPU1@1239,248RI@186801,36E5Y@31979,COG4626@1,COG4626@2	NA|NA|NA	S	Terminase	PANTHER, Pfam, Gene3D	PTHR41287, PF03354, G3DSA:3.40.50.300	Phage Terminase	IPR005021, IPR005021	Terminase large subunit, Lambdalikevirus-type, Terminase large subunit, Lambdalikevirus-type
NC_008261.1_128_1	195103.CPF_1587	7.5e-13	78.6	Clostridiaceae													Bacteria	1TPU1@1239,248RI@186801,36E5Y@31979,COG4626@1,COG4626@2	NA|NA|NA	S	Terminase	NA	NA	NA	NA	NA	NA	NA
NC_008261.1_129_1	190478.Q8SBQ3_9CAUD	6e-17	92.4	Siphoviridae													Viruses	4QBS6@10239,4QM0S@10699,4QPP2@28883,4QUNW@35237	NA|NA|NA	S	Phage terminase, small subunit	Pfam	PF05119	Phage terminase, small subunit	IPR006448	Putative phage terminase, small subunit, P27 family
NC_008261.1_13_1	195103.CPF_0122	5.6e-46	189.9	Firmicutes				ko:K12287					ko00000,ko02044				Bacteria	1TQ59@1239,COG4932@1,COG4932@2	NA|NA|NA	M	domain protein	Gene3D	G3DSA:2.60.40.10		IPR013783	Immunoglobulin-like fold
NC_008261.1_130_1	195103.CPF_1588	1.3e-32	145.2	Clostridiaceae													Bacteria	1W0JT@1239,24TBH@186801,36N5Q@31979,COG3747@1,COG3747@2	NA|NA|NA	L	Phage terminase, small subunit	NA	NA	NA	NA	NA	NA	NA
NC_008261.1_130_2	190478.Q8SBK4_9CAUD	1.1e-43	182.6	Siphoviridae													Viruses	4QAKE@10239,4QKTX@10699,4QPCE@28883,4QUP7@35237	NA|NA|NA	S	HNH endonuclease	CDD, PANTHER, Pfam, SMART	cd00085, PTHR41286, PF01844, SM00507	HNHc, HNH endonuclease	IPR003615, IPR002711, IPR003615	HNH nuclease, HNH endonuclease, HNH nuclease	GO:0003676, GO:0004519
NC_008261.1_133_1	195103.CPF_1590	1.2e-97	362.5	Clostridiaceae				ko:K04763					ko00000,ko03036				Bacteria	1V2RX@1239,24DD0@186801,36J61@31979,COG0582@1,COG0582@2	NA|NA|NA	L	integrase family	SUPERFAMILY, Gene3D, CDD, PANTHER, PANTHER, Pfam	SSF56349, G3DSA:1.10.443.10, cd01192, PTHR30349:SF34, PTHR30349, PF00589	INT_C_like_3, Phage integrase family	IPR011010, IPR013762, IPR002104	DNA breaking-rejoining enzyme, catalytic core, Integrase-like, catalytic domain superfamily, Integrase, catalytic domain	GO:0003677, GO:0003677, GO:0006310, GO:0015074, GO:0003677, GO:0006310, GO:0015074
NC_008261.1_134_1	195103.CPF_1592	1e-29	135.2	Clostridiaceae													Bacteria	1UQSG@1239,24USZ@186801,2BB19@1,324HB@2,36NZN@31979	NA|NA|NA			NA	NA	NA	NA	NA	NA	NA
NC_008261.1_134_2	195103.CPF_1593	6.3e-76	290	Bacteria	fliA			ko:K02405,ko:K03093	ko02020,ko02025,ko02026,ko02040,ko05111,map02020,map02025,map02026,map02040,map05111				ko00000,ko00001,ko02035,ko03021				Bacteria	COG1191@1,COG1191@2	NA|NA|NA	K	sigma factor activity	SUPERFAMILY, Gene3D, Coils	SSF88659, G3DSA:1.20.140.160, Coil		IPR013324	RNA polymerase sigma factor, region 3/4-like
NC_008261.1_135_1	195103.CPF_1595	1.1e-62	245.7	Clostridiaceae	ssb			ko:K03111	ko03030,ko03430,ko03440,map03030,map03430,map03440				ko00000,ko00001,ko03029,ko03032,ko03400				Bacteria	1V3WT@1239,24HF9@186801,36IQ6@31979,COG0629@1,COG0629@2	NA|NA|NA	L	Single-stranded DNA-binding protein	Gene3D, SUPERFAMILY, PANTHER, TIGRFAM, Pfam, Hamap, PIRSF, CDD, ProSiteProfiles, PANTHER	G3DSA:2.40.50.140, SSF50249, PTHR10302:SF0, TIGR00621, PF00436, MF_00984, PIRSF002070, cd04496, PS50935, PTHR10302	ssb: single-stranded DNA-binding protein, Single-strand binding protein family, Single-stranded DNA-binding protein., SSB_OBF, Single-strand binding (SSB) domain profile.	IPR012340, IPR011344, IPR011344, IPR000424, IPR011344, IPR000424, IPR000424, IPR000424	Nucleic acid-binding, OB-fold, Single-stranded DNA-binding protein, Single-stranded DNA-binding protein, Primosome PriB/single-strand DNA-binding, Single-stranded DNA-binding protein, Primosome PriB/single-strand DNA-binding, Primosome PriB/single-strand DNA-binding, Primosome PriB/single-strand DNA-binding	GO:0003697, GO:0006260, GO:0003697, GO:0006260, GO:0003697, GO:0003697, GO:0006260, GO:0003697, GO:0003697, GO:0003697	Reactome: R-HSA-2151201, Reactome: R-HSA-2151201, Reactome: R-HSA-2151201, Reactome: R-HSA-2151201, Reactome: R-HSA-2151201, Reactome: R-HSA-2151201, Reactome: R-HSA-2151201
NC_008261.1_135_2	NA	NA	NA	NA	NA	NA	NA	NA	NA	NA	NA	NA	NA	NA	NA	NA	NA	NA	NA	NA	NA	Coils	Coil
NC_008261.1_135_3	195103.CPF_1597	2.7e-205	721.1	Clostridiaceae	dnaB		3.6.4.12	ko:K02314	ko03030,ko04112,map03030,map04112				ko00000,ko00001,ko01000,ko03032				Bacteria	1TPCT@1239,24DCY@186801,36G9U@31979,COG0305@1,COG0305@2	NA|NA|NA	L	replicative DNA helicase	Gene3D, SUPERFAMILY, Pfam, ProSiteProfiles, Gene3D, PANTHER, CDD	G3DSA:1.10.860.10, SSF52540, PF03796, PS51199, G3DSA:3.40.50.300, PTHR30153, cd00984	DnaB-like helicase C terminal domain, Superfamily 4 helicase domain profile., DnaB_C	IPR016136, IPR027417, IPR007694, IPR007694, IPR007694	DNA helicase DnaB, N-terminal/DNA primase DnaG, C-terminal, P-loop containing nucleoside triphosphate hydrolase, DNA helicase, DnaB-like, C-terminal, DNA helicase, DnaB-like, C-terminal, DNA helicase, DnaB-like, C-terminal	GO:0003678, GO:0005524, GO:0006260, GO:0003678, GO:0005524, GO:0006260, GO:0003678, GO:0005524, GO:0006260	Reactome: R-HSA-2151201, Reactome: R-HSA-2151201, Reactome: R-HSA-2151201
NC_008261.1_136_1	195103.CPF_1597	7.9e-13	78.6	Clostridiaceae	dnaB		3.6.4.12	ko:K02314	ko03030,ko04112,map03030,map04112				ko00000,ko00001,ko01000,ko03032				Bacteria	1TPCT@1239,24DCY@186801,36G9U@31979,COG0305@1,COG0305@2	NA|NA|NA	L	replicative DNA helicase	Pfam, SUPERFAMILY, Gene3D	PF00772, SSF48024, G3DSA:1.10.860.10	DnaB-like helicase N terminal domain	IPR007693, IPR036185, IPR016136	DNA helicase, DnaB-like, N-terminal, DNA helicase, DnaB-like, N-terminal domain superfamily, DNA helicase DnaB, N-terminal/DNA primase DnaG, C-terminal	GO:0003678, GO:0005524, GO:0006260, GO:0003678, GO:0005524, GO:0006260
NC_008261.1_136_2	195103.CPF_1598	1.2e-52	212.2	Clostridiaceae													Bacteria	1VX1Z@1239,25EAV@186801,36URP@31979,COG1802@1,COG1802@2	NA|NA|NA	K	Conserved phage C-terminus (Phg_2220_C)	Pfam, TIGRFAM	PF09524, TIGR02220	Conserved phage C-terminus (Phg_2220_C), phg_TIGR02220: phage conserved hypothetical protein, C-terminal domain	IPR011741, IPR011741	Phage conserved hypothetical protein, C-terminal, Phage conserved hypothetical protein, C-terminal
NC_008261.1_137_4	195103.CPF_1602	3.6e-85	320.9	Clostridiaceae													Bacteria	1V6NP@1239,25CXJ@186801,36X27@31979,COG1813@1,COG1813@2	NA|NA|NA	K	sequence-specific DNA binding	NA	NA	NA	NA	NA	NA	NA
NC_008261.1_140_1	195103.CPF_1604	1.3e-07	60.8	Clostridiaceae													Bacteria	1VK84@1239,24QK6@186801,36MPM@31979,COG1396@1,COG1396@2	NA|NA|NA	K	transcriptional regulator	Gene3D	G3DSA:1.10.260.40
NC_008261.1_142_1	195103.CPF_1607	5.7e-83	313.5	Clostridiaceae													Bacteria	1VCI1@1239,24JB4@186801,36JVP@31979,COG2856@1,COG2856@2	NA|NA|NA	E	Pfam:DUF955	Pfam	PF06114	IrrE N-terminal-like domain	IPR010359	IrrE N-terminal-like domain
NC_008261.1_142_10	195103.CPF_1615	5.3e-110	403.7	Clostridiaceae	busR			ko:K03281,ko:K03710					ko00000,ko03000	2.A.49			Bacteria	1UZRI@1239,2496Y@186801,36E5U@31979,COG0490@1,COG0490@2,COG2188@1,COG2188@2	NA|NA|NA	K	hmm pf02080	Pfam, PANTHER, Gene3D, PANTHER, Pfam, SMART, SUPERFAMILY, ProSiteProfiles, SUPERFAMILY, ProSiteProfiles, Gene3D	PF00392, PTHR30445, G3DSA:3.30.70.1450, PTHR30445:SF3, PF02080, SM00345, SSF46785, PS51202, SSF116726, PS50949, G3DSA:1.10.10.10	Bacterial regulatory proteins, gntR family, TrkA-C domain, RCK C-terminal domain profile., GntR-type HTH domain profile.	IPR000524, IPR036721, IPR006037, IPR000524, IPR036390, IPR006037, IPR036721, IPR000524, IPR036388	Transcription regulator HTH, GntR, Regulator of K+ conductance, C-terminal domain superfamily, Regulator of K+ conductance, C-terminal, Transcription regulator HTH, GntR, Winged helix DNA-binding domain superfamily, Regulator of K+ conductance, C-terminal, Regulator of K+ conductance, C-terminal domain superfamily, Transcription regulator HTH, GntR, Winged helix-like DNA-binding domain superfamily	GO:0003700, GO:0006355, GO:0006813, GO:0006813, GO:0008324, GO:0003700, GO:0006355, GO:0006813, GO:0008324, GO:0006813, GO:0003700, GO:0006355
NC_008261.1_142_100	195103.CPF_1706	0	1186.8	Clostridiaceae	pepF			ko:K08602					ko00000,ko01000,ko01002				Bacteria	1TP4P@1239,248TP@186801,36DG9@31979,COG1164@1,COG1164@2	NA|NA|NA	E	oligoendopeptidase F	PANTHER, CDD, TIGRFAM, Pfam, Gene3D, PANTHER, Pfam, Gene3D, Gene3D, SUPERFAMILY	PTHR11804, cd09608, TIGR00181, PF01432, G3DSA:1.10.1370.20, PTHR11804:SF70, PF08439, G3DSA:1.10.287.830, G3DSA:1.20.140.70, SSF55486	M3B_PepF_3, pepF: oligoendopeptidase F, Peptidase family M3, Oligopeptidase F	IPR004438, IPR001567, IPR013647	Peptidase M3B, oligoendopeptidase F, Peptidase M3A/M3B catalytic domain, Oligopeptidase F, N-terminal domain	GO:0004222, GO:0006508, GO:0004222, GO:0006508
NC_008261.1_142_101	195103.CPF_1707	3.5e-67	260.8	Clostridiaceae													Bacteria	1VGGS@1239,24JJ2@186801,2E70J@1,331JD@2,36JT3@31979	NA|NA|NA			NA	NA	NA	NA	NA	NA	NA
NC_008261.1_142_102	195103.CPF_1708	3.8e-54	217.2	Clostridiaceae													Bacteria	1UGVG@1239,24QHA@186801,29VGR@1,30GYB@2,36MGR@31979	NA|NA|NA			NA	NA	NA	NA	NA	NA	NA
NC_008261.1_142_103	195103.CPF_1709	1.6e-117	428.7	Clostridiaceae	adcC			ko:K09817	ko02010,map02010	M00242			ko00000,ko00001,ko00002,ko01000,ko02000	3.A.1.15.3,3.A.1.15.5		iHN637.CLJU_RS15665,iYO844.BSU02860	Bacteria	1TQ68@1239,248F1@186801,36I3C@31979,COG1121@1,COG1121@2	NA|NA|NA	P	ABC transporter	SUPERFAMILY, Pfam, PANTHER, SMART, PANTHER, ProSitePatterns, ProSiteProfiles, Gene3D	SSF52540, PF00005, PTHR42734:SF5, SM00382, PTHR42734, PS00211, PS50893, G3DSA:3.40.50.300	ABC transporter, ABC transporters family signature., ATP-binding cassette, ABC transporter-type domain profile.	IPR027417, IPR003439, IPR003593, IPR017871, IPR003439	P-loop containing nucleoside triphosphate hydrolase, ABC transporter-like, AAA+ ATPase domain, ABC transporter, conserved site, ABC transporter-like	GO:0005524, GO:0016887, GO:0005524, GO:0016887, GO:0005524, GO:0016887
NC_008261.1_142_104	195103.CPF_1710	5.4e-131	473.8	Clostridiaceae	znuB			ko:K09816	ko02010,map02010	M00242			ko00000,ko00001,ko00002,ko02000	3.A.1.15.3,3.A.1.15.5			Bacteria	1TR79@1239,24875@186801,36EWA@31979,COG1108@1,COG1108@2	NA|NA|NA	P	ABC 3 transport family	Pfam, Gene3D, PANTHER, CDD, PANTHER, SUPERFAMILY	PF00950, G3DSA:1.10.3470.10, PTHR30477, cd06550, PTHR30477:SF0, SSF81345	ABC 3 transport family, TM_ABC_iron-siderophores_like	IPR001626, IPR037294, IPR001626, IPR037294	ABC transporter, TroCD-like, ABC transporter, BtuC-like, ABC transporter, TroCD-like, ABC transporter, BtuC-like	GO:0005887, GO:0042626, GO:0043190, GO:0055085, GO:0005887, GO:0042626, GO:0043190, GO:0055085
NC_008261.1_142_105	195103.CPF_1711	4.5e-250	870.2	Clostridiaceae													Bacteria	1TNZN@1239,247YX@186801,36DT9@31979,COG0534@1,COG0534@2	NA|NA|NA	V	Mate efflux family protein	TIGRFAM, PANTHER, PIRSF, Pfam, Pfam, PANTHER, CDD	TIGR00797, PTHR43549, PIRSF006603, PF01554, PF01554, PTHR43549:SF2, cd13140	matE: MATE efflux family protein, MatE, MatE, MATE_like_1	IPR002528, IPR002528, IPR002528, IPR002528	Multi antimicrobial extrusion protein, Multi antimicrobial extrusion protein, Multi antimicrobial extrusion protein, Multi antimicrobial extrusion protein	GO:0006855, GO:0015238, GO:0015297, GO:0016020, GO:0055085, GO:0006855, GO:0015238, GO:0015297, GO:0016020, GO:0055085, GO:0006855, GO:0015238, GO:0015297, GO:0016020, GO:0055085, GO:0006855, GO:0015238, GO:0015297, GO:0016020, GO:0055085	Reactome: R-HSA-425366, Reactome: R-HSA-425366, Reactome: R-HSA-425366, Reactome: R-HSA-425366
NC_008261.1_142_106	195103.CPF_1712	0	1642.9	Clostridiaceae													Bacteria	1VR29@1239,258QE@186801,36H6Z@31979,COG3669@1,COG3669@2	NA|NA|NA	G	Fn3 associated	Pfam, SUPERFAMILY, Gene3D, Pfam	PF00754, SSF49785, G3DSA:2.60.120.260, PF13287	F5/8 type C domain, Fn3 associated	IPR000421, IPR008979, IPR008979, IPR026876	Coagulation factor 5/8 C-terminal domain, Galactose-binding-like domain superfamily, Galactose-binding-like domain superfamily, Fn3 associated repeat
NC_008261.1_142_107	195103.CPF_1713	3.2e-71	274.2	Clostridiaceae	fur			ko:K03711,ko:K09823	ko02024,map02024				ko00000,ko00001,ko03000				Bacteria	1VF38@1239,24SA6@186801,36JN2@31979,COG0735@1,COG0735@2	NA|NA|NA	P	Belongs to the Fur family	Gene3D, SUPERFAMILY, PANTHER, PANTHER, Gene3D, CDD, Pfam	G3DSA:3.30.1490.190, SSF46785, PTHR33202, PTHR33202:SF8, G3DSA:1.10.10.10, cd07153, PF01475	Fur_like, Ferric uptake regulator family	IPR036390, IPR002481, IPR036388, IPR002481, IPR002481	Winged helix DNA-binding domain superfamily, Ferric-uptake regulator, Winged helix-like DNA-binding domain superfamily, Ferric-uptake regulator, Ferric-uptake regulator	GO:0003700, GO:0006355, GO:0003700, GO:0006355, GO:0003700, GO:0006355
NC_008261.1_142_108	195103.CPF_1714	2e-144	518.5	Clostridiaceae	ptsD			ko:K02747,ko:K02796	ko00051,ko00052,ko00520,ko01100,ko02060,map00051,map00052,map00520,map01100,map02060	M00276,M00277	R02630,R08366	RC00017,RC03206	ko00000,ko00001,ko00002,ko02000	4.A.6.1,4.A.6.1.4			Bacteria	1UT1F@1239,25C3E@186801,36H1M@31979,COG3716@1,COG3716@2	NA|NA|NA	G	system, mannose fructose sorbose family IID component	PANTHER, Pfam, ProSiteProfiles, PANTHER	PTHR32502:SF7, PF03613, PS51108, PTHR32502	PTS system mannose/fructose/sorbose family IID component, PTS_EIID domain profile.	IPR004704, IPR004704	Phosphotransferase system, mannose/fructose/sorbose family IID component, Phosphotransferase system, mannose/fructose/sorbose family IID component	GO:0009401, GO:0016021, GO:0009401, GO:0016021
NC_008261.1_142_109	195103.CPF_1715	2.8e-135	488	Clostridiaceae	ptsC			ko:K02795	ko00051,ko00520,ko01100,ko02060,map00051,map00520,map01100,map02060	M00276	R02630	RC00017,RC03206	ko00000,ko00001,ko00002,ko02000	4.A.6.1			Bacteria	1UZ1T@1239,24EVS@186801,36J0R@31979,COG3715@1,COG3715@2	NA|NA|NA	G	PTS system sorbose-specific iic component	Pfam, PANTHER, PANTHER, ProSiteProfiles	PF03609, PTHR32502:SF8, PTHR32502, PS51106	PTS system sorbose-specific iic component, PTS_EIIC type-4 domain profile.	IPR004700, IPR004700	Phosphotransferase system, mannose/fructose/sorbose family, IIC subunit, Phosphotransferase system, mannose/fructose/sorbose family, IIC subunit	GO:0009401, GO:0016021, GO:0009401, GO:0016021
NC_008261.1_142_11	195103.CPF_1616	2.7e-132	478	Clostridiaceae													Bacteria	1V7NB@1239,24M5X@186801,30AIC@2,36FUS@31979,arCOG03165@1	NA|NA|NA			NA	NA	NA	NA	NA	NA	NA
NC_008261.1_142_110	195103.CPF_1716	1.7e-82	312	Clostridiaceae	ptsB		2.7.1.191	ko:K02794	ko00051,ko00520,ko01100,ko02060,map00051,map00520,map01100,map02060	M00276	R02630	RC00017,RC03206	ko00000,ko00001,ko00002,ko01000,ko02000	4.A.6.1			Bacteria	1V2WT@1239,25C65@186801,36GU3@31979,COG3444@1,COG3444@2	NA|NA|NA	G	Pts system	Gene3D, PANTHER, SUPERFAMILY, PANTHER, ProSiteProfiles, Pfam	G3DSA:3.40.35.10, PTHR33799, SSF52728, PTHR33799:SF5, PS51101, PF03830	PTS_EIIB type-4 domain profile., PTS system sorbose subfamily IIB component	IPR036667, IPR036667, IPR004720, IPR004720	Phosphotransferase system, sorbose subfamily IIB component superfamily, Phosphotransferase system, sorbose subfamily IIB component superfamily, Phosphotransferase system, sorbose subfamily IIB component, Phosphotransferase system, sorbose subfamily IIB component	GO:0005737, GO:0008982, GO:0009401, GO:0005737, GO:0008982, GO:0009401, GO:0005737, GO:0008982, GO:0009401, GO:0005737, GO:0008982, GO:0009401
NC_008261.1_142_111	195103.CPF_1717	3.5e-65	254.2	Clostridiaceae			2.7.1.191	ko:K02793	ko00051,ko00520,ko01100,ko02060,map00051,map00520,map01100,map02060	M00276	R02630	RC00017,RC03206	ko00000,ko00001,ko00002,ko01000,ko02000	4.A.6.1			Bacteria	1V9MT@1239,24N3N@186801,36J3C@31979,COG2893@1,COG2893@2	NA|NA|NA	G	PTS system	PANTHER, PANTHER, SUPERFAMILY, Pfam, CDD, Gene3D, ProSiteProfiles	PTHR33799, PTHR33799:SF4, SSF53062, PF03610, cd00006, G3DSA:3.40.50.510, PS51096	PTS system fructose IIA component, PTS_IIA_man, PTS_EIIA type-4 domain profile.	IPR036662, IPR004701, IPR033887, IPR036662, IPR004701	Phosphotransferase system, mannose-type IIA component superfamily, Phosphotransferase system, mannose-type IIA component, PTS system mannose/sorbose specific IIA subunit, Phosphotransferase system, mannose-type IIA component superfamily, Phosphotransferase system, mannose-type IIA component	GO:0009401, GO:0016021, GO:0009401, GO:0016021, GO:0009401, GO:0016021, GO:0009401, GO:0016021
NC_008261.1_142_112	195103.CPF_1718	3.8e-221	773.9	Clostridiaceae	pfp		2.7.1.11,2.7.1.90	ko:K00850,ko:K21071	ko00010,ko00030,ko00051,ko00052,ko00680,ko01100,ko01110,ko01120,ko01130,ko01200,ko01230,ko03018,ko04152,ko05230,map00010,map00030,map00051,map00052,map00680,map01100,map01110,map01120,map01130,map01200,map01230,map03018,map04152,map05230	M00001,M00345	R00756,R00764,R02073,R03236,R03237,R03238,R03239,R04779	RC00002,RC00017	ko00000,ko00001,ko00002,ko01000,ko01009,ko03019				Bacteria	1TRJQ@1239,247IV@186801,36FK7@31979,COG0205@1,COG0205@2	NA|NA|NA	G	Catalyzes the phosphorylation of D-fructose 6-phosphate, the first committing step of glycolysis. Uses inorganic phosphate (PPi) as phosphoryl donor instead of ATP like common ATP-dependent phosphofructokinases (ATP-PFKs), which renders the reaction reversible, and can thus function both in glycolysis and gluconeogenesis. Consistently, PPi-PFK can replace the enzymes of both the forward (ATP-PFK)…	Pfam, PANTHER, Gene3D, PIRSF, PANTHER, Coils, PRINTS, PRINTS, PRINTS, PRINTS, PRINTS, Gene3D, Hamap, SUPERFAMILY	PF00365, PTHR13697, G3DSA:3.40.50.460, PIRSF036483, PTHR13697:SF51, Coil, PR00476, PR00476, PR00476, PR00476, PR00476, G3DSA:3.40.50.450, MF_01978, SSF53784	Phosphofructokinase, ATP-dependent phosphofructokinase family signature, ATP-dependent phosphofructokinase family signature, ATP-dependent phosphofructokinase family signature, ATP-dependent phosphofructokinase family signature, ATP-dependent phosphofructokinase family signature, Pyrophosphate--fructose 6-phosphate 1-phosphotransferase [pfp].	IPR000023, IPR011404, IPR022953, IPR022953, IPR022953, IPR022953, IPR022953, IPR011404, IPR035966	Phosphofructokinase domain, Pyrophosphate--fructose 6-phosphate 1-phosphotransferase, XF0274, ATP-dependent 6-phosphofructokinase, ATP-dependent 6-phosphofructokinase, ATP-dependent 6-phosphofructokinase, ATP-dependent 6-phosphofructokinase, ATP-dependent 6-phosphofructokinase, Pyrophosphate--fructose 6-phosphate 1-phosphotransferase, XF0274, Phosphofructokinase superfamily	GO:0003872, GO:0006096, GO:0006096, GO:0047334, GO:0003872, GO:0006002, GO:0006096, GO:0003872, GO:0006002, GO:0006096, GO:0003872, GO:0006002, GO:0006096, GO:0003872, GO:0006002, GO:0006096, GO:0003872, GO:0006002, GO:0006096, GO:0006096, GO:0047334, GO:0003872, GO:0006096	KEGG: 00010+2.7.1.11|KEGG: 00030+2.7.1.11|KEGG: 00051+2.7.1.11|KEGG: 00052+2.7.1.11|KEGG: 00680+2.7.1.11|MetaCyc: PWY-1042|MetaCyc: PWY-1861|MetaCyc: PWY-5484|MetaCyc: PWY-7385|Reactome: R-HSA-70171, KEGG: 00010+2.7.1.90|KEGG: 00030+2.7.1.90|KEGG: 00051+2.7.1.90|MetaCyc: PWY-1042, KEGG: 00010+2.7.1.11|KEGG: 00030+2.7.1.11|KEGG: 00051+2.7.1.11|KEGG: 00052+2.7.1.11|KEGG: 00680+2.7.1.11|MetaCyc: PWY…
NC_008261.1_142_113	195103.CPF_1719	8.3e-47	193	Clostridiaceae													Bacteria	1VDH3@1239,24JQ8@186801,2EJBW@1,33D30@2,36K19@31979	NA|NA|NA	S	Putative redox-active protein (C_GCAxxG_C_C)	Pfam, TIGRFAM, SUPERFAMILY	PF09719, TIGR01909, SSF48695	Putative redox-active protein (C_GCAxxG_C_C), C_GCAxxG_C_C: C_GCAxxG_C_C family protein	IPR010181, IPR010181, IPR036280	CGCAxxGCC motif, CGCAxxGCC motif, Multiheme cytochrome superfamily
NC_008261.1_142_114	195103.CPF_1720	4e-245	853.6	Clostridiaceae	csdA		2.8.1.7	ko:K04487	ko00730,ko01100,ko04122,map00730,map01100,map04122		R07460,R11528,R11529	RC01789,RC02313	ko00000,ko00001,ko01000,ko02048,ko03016,ko03029				Bacteria	1TQ1W@1239,249CS@186801,36EKE@31979,COG0520@1,COG0520@2	NA|NA|NA	E	Catalyzes the removal of elemental sulfur and selenium atoms from L-cysteine, L-cystine, L-selenocysteine, and L- selenocystine to produce L-alanine	SUPERFAMILY, Gene3D, Coils, Gene3D, ProSitePatterns, PANTHER, Pfam	SSF53383, G3DSA:3.90.1150.10, Coil, G3DSA:3.40.640.10, PS00595, PTHR43586, PF00266	Aminotransferases class-V pyridoxal-phosphate attachment site., Aminotransferase class-V	IPR015424, IPR015422, IPR015421, IPR020578, IPR000192	Pyridoxal phosphate-dependent transferase, Pyridoxal phosphate-dependent transferase domain 1, Pyridoxal phosphate-dependent transferase, major domain, Aminotransferase class-V, pyridoxal-phosphate binding site, Aminotransferase class V domain	GO:0003824, GO:0003824
NC_008261.1_142_115	195103.CPF_1721	0	1194.1	Clostridiaceae				ko:K06158					ko00000,ko03012				Bacteria	1TPAX@1239,247U6@186801,36E7X@31979,COG0488@1,COG0488@2	NA|NA|NA	S	ABC transporter	Pfam, ProSitePatterns, CDD, SMART, SMART, CDD, Coils, SUPERFAMILY, Coils, PANTHER, Pfam, Gene3D, Gene3D, PANTHER, ProSiteProfiles, SUPERFAMILY, Pfam, Pfam, ProSiteProfiles	PF00005, PS00211, cd03221, SM00382, SM00382, cd03221, Coil, SSF52540, Coil, PTHR19211:SF95, PF12848, G3DSA:3.40.50.300, G3DSA:3.40.50.300, PTHR19211, PS50893, SSF52540, PF00005, PF16326, PS50893	ABC transporter, ABC transporters family signature., ABCF_EF-3, ABCF_EF-3, ABC transporter, ATP-binding cassette, ABC transporter-type domain profile., ABC transporter, ABC transporter C-terminal domain, ATP-binding cassette, ABC transporter-type domain profile.	IPR003439, IPR017871, IPR003593, IPR003593, IPR027417, IPR032781, IPR003439, IPR027417, IPR003439, IPR032524, IPR003439	ABC transporter-like, ABC transporter, conserved site, AAA+ ATPase domain, AAA+ ATPase domain, P-loop containing nucleoside triphosphate hydrolase, ABC-transporter extension domain, ABC transporter-like, P-loop containing nucleoside triphosphate hydrolase, ABC transporter-like, ABC transporter Uup, C-terminal, ABC transporter-like	GO:0005524, GO:0016887, GO:0005524, GO:0016887, GO:0005524, GO:0016887, GO:0005524, GO:0016887, GO:0003677, GO:0005524, GO:0016887
NC_008261.1_142_116	195103.CPF_1722	2.1e-87	328.2	Clostridia	dut	GO:0000287,GO:0003674,GO:0003824,GO:0004170,GO:0005488,GO:0006139,GO:0006220,GO:0006221,GO:0006226,GO:0006244,GO:0006725,GO:0006753,GO:0006793,GO:0006796,GO:0006807,GO:0008150,GO:0008152,GO:0009056,GO:0009058,GO:0009117,GO:0009123,GO:0009124,GO:0009129,GO:0009130,GO:0009141,GO:0009143,GO:0009147,GO:0009149,GO:0009157,GO:0009162,GO:0009165,GO:0009166,GO:0009176,GO:0009177,GO:0009200,GO:0009204,GO:…	3.6.1.23,4.1.1.36,6.3.2.5	ko:K01520,ko:K13038	ko00240,ko00770,ko00983,ko01100,map00240,map00770,map00983,map01100	M00053,M00120	R02100,R03269,R04231,R11896	RC00002,RC00064,RC00090,RC00822	ko00000,ko00001,ko00002,ko01000,ko03400			iYO844.BSU17660	Bacteria	1VVPZ@1239,25CJ5@186801,COG0756@1,COG0756@2	NA|NA|NA	F	dUTPase	PANTHER, Pfam, SUPERFAMILY, CDD, Gene3D, PANTHER	PTHR11241:SF0, PF00692, SSF51283, cd07557, G3DSA:2.70.40.10, PTHR11241	dUTPase, trimeric_dUTPase	IPR029054, IPR036157, IPR033704, IPR036157, IPR008181	dUTPase-like, dUTPase-like superfamily, dUTPase, trimeric, dUTPase-like superfamily, Deoxyuridine triphosphate nucleotidohydrolase	GO:0004170, GO:0046080	KEGG: 00240+3.6.1.23|KEGG: 00983+3.6.1.23
NC_008261.1_142_117	1294142.CINTURNW_2983	1.6e-15	89.7	Clostridiaceae													Bacteria	1UFXA@1239,24KF2@186801,29V22@1,30GF8@2,36JK6@31979	NA|NA|NA			NA	NA	NA	NA	NA	NA	NA
NC_008261.1_142_118	195103.CPF_1724	6.2e-94	350.1	Clostridiaceae	M1-874			ko:K13638,ko:K13640					ko00000,ko03000				Bacteria	1V1M9@1239,24FUE@186801,36KVK@31979,COG0789@1,COG0789@2	NA|NA|NA	K	Domain of unknown function (DUF1836)	ProSiteProfiles, Coils, Pfam, PANTHER	PS51450, Coil, PF08876, PTHR40056	Leucine-rich repeat profile., Domain of unknown function (DUF1836)	IPR001611, IPR014975, IPR014975	Leucine-rich repeat, Protein of unknown function DUF1836, Protein of unknown function DUF1836	GO:0005515
NC_008261.1_142_119	195103.CPF_1725	1.4e-110	405.6	Clostridiaceae	yplQ			ko:K11068					ko00000,ko02042				Bacteria	1TSFK@1239,24CPT@186801,36HYG@31979,COG1272@1,COG1272@2	NA|NA|NA	S	channel protein, hemolysin III family	TIGRFAM, PANTHER, Pfam, PANTHER	TIGR01065, PTHR20855, PF03006, PTHR20855:SF3	hlyIII: channel protein, hemolysin III family, Haemolysin-III related	IPR005744, IPR004254, IPR004254	Hly-III, AdipoR/Haemolysin-III-related, AdipoR/Haemolysin-III-related	GO:0016021, GO:0019835, GO:0016021, GO:0016021
NC_008261.1_142_12	195103.CPF_1617	9.9e-187	659.4	Clostridiaceae													Bacteria	1TPEV@1239,249SW@186801,36GKC@31979,COG5438@1,COG5438@2	NA|NA|NA	S	YibE F family protein	Pfam, Coils, PANTHER	PF07907, Coil, PTHR41771	YibE/F-like protein	IPR012507, IPR012507	YibE/F-like, YibE/F-like
NC_008261.1_142_120	195103.CPF_1726	8.7e-159	566.2	Clostridiaceae													Bacteria	1TP6T@1239,24970@186801,36FHV@31979,COG0583@1,COG0583@2	NA|NA|NA	K	Transcriptional regulator	PRINTS, PRINTS, PRINTS, Gene3D, PANTHER, SUPERFAMILY, Pfam, SUPERFAMILY, CDD, Gene3D, PANTHER, Pfam, ProSiteProfiles	PR00039, PR00039, PR00039, G3DSA:3.40.190.290, PTHR30126:SF39, SSF53850, PF03466, SSF46785, cd08420, G3DSA:1.10.10.10, PTHR30126, PF00126, PS50931	LysR bacterial regulatory protein HTH signature, LysR bacterial regulatory protein HTH signature, LysR bacterial regulatory protein HTH signature, LysR substrate binding domain, PBP2_CysL_like, Bacterial regulatory helix-turn-helix protein, lysR family, LysR-type HTH domain profile.	IPR000847, IPR000847, IPR000847, IPR005119, IPR036390, IPR036388, IPR000847, IPR000847	Transcription regulator HTH, LysR, Transcription regulator HTH, LysR, Transcription regulator HTH, LysR, LysR, substrate-binding, Winged helix DNA-binding domain superfamily, Winged helix-like DNA-binding domain superfamily, Transcription regulator HTH, LysR, Transcription regulator HTH, LysR	GO:0003700, GO:0006355, GO:0003700, GO:0006355, GO:0003700, GO:0006355, GO:0003700, GO:0006355, GO:0003700, GO:0006355
NC_008261.1_142_121	NA	NA	NA	NA	NA	NA	NA	NA	NA	NA	NA	NA	NA	NA	NA	NA	NA	NA	NA	NA	NA	MobiDBLite	mobidb-lite	consensus disorder prediction
NC_008261.1_142_122	195103.CPF_1728	7.6e-129	466.5	Clostridiaceae													Bacteria	1V1X7@1239,24E5V@186801,36DUV@31979,COG0726@1,COG0726@2	NA|NA|NA	G	polysaccharide deacetylase	Gene3D, PANTHER, CDD, SUPERFAMILY, Pfam, ProSiteProfiles, PANTHER	G3DSA:3.20.20.370, PTHR10587:SF97, cd10944, SSF88713, PF01522, PS51677, PTHR10587	CE4_SmPgdA_like, Polysaccharide deacetylase, NodB homology domain profile.	IPR011330, IPR002509, IPR002509	Glycoside hydrolase/deacetylase, beta/alpha-barrel, NodB homology domain, NodB homology domain	GO:0003824, GO:0005975, GO:0005975, GO:0016810, GO:0005975, GO:0016810
NC_008261.1_142_123	37659.JNLN01000001_gene1048	1.5e-07	63.2	Clostridiaceae			3.5.1.28	ko:K01448	ko01503,map01503	M00727	R04112	RC00064,RC00141	ko00000,ko00001,ko00002,ko01000,ko01011,ko03036				Bacteria	1VMZP@1239,24MWG@186801,36VFY@31979,COG0860@1,COG0860@2	NA|NA|NA	M	Ami_3	SUPERFAMILY, Gene3D	SSF53187, G3DSA:3.40.630.40
NC_008261.1_142_124	195103.CPF_1730	7.5e-120	436.4	Clostridiaceae													Bacteria	1UPR4@1239,25HMD@186801,2B9GQ@1,2ZCFA@2,36VBF@31979	NA|NA|NA			NA	NA	NA	NA	NA	NA	NA
NC_008261.1_142_125	195103.CPF_1731	3.9e-293	1013.4	Clostridiaceae	sulP	GO:0003333,GO:0003674,GO:0005215,GO:0005310,GO:0005326,GO:0005342,GO:0005575,GO:0005623,GO:0005886,GO:0005887,GO:0006810,GO:0006811,GO:0006820,GO:0006835,GO:0006836,GO:0006855,GO:0006865,GO:0008150,GO:0008272,GO:0008509,GO:0008514,GO:0015075,GO:0015103,GO:0015116,GO:0015138,GO:0015141,GO:0015171,GO:0015172,GO:0015179,GO:0015183,GO:0015238,GO:0015318,GO:0015556,GO:0015698,GO:0015711,GO:0015740,GO:…		ko:K03321					ko00000,ko02000	2.A.53.3		iSbBS512_1146.SbBS512_E1370	Bacteria	1TPI4@1239,24978@186801,36EJM@31979,COG0659@1,COG0659@2	NA|NA|NA	P	Sulfate permease	PANTHER, TIGRFAM, CDD, PANTHER, Pfam, Pfam, Gene3D, SUPERFAMILY, ProSiteProfiles	PTHR11814:SF184, TIGR00815, cd07042, PTHR11814, PF00916, PF01740, G3DSA:3.30.750.24, SSF52091, PS50801	sulP: sulfate permease, STAS_SulP_like_sulfate_transporter, Sulfate permease family, STAS domain, STAS domain profile.	IPR001902, IPR001902, IPR011547, IPR002645, IPR036513, IPR036513, IPR002645	SLC26A/SulP transporter, SLC26A/SulP transporter, SLC26A/SulP transporter domain, STAS domain, STAS domain superfamily, STAS domain superfamily, STAS domain	GO:0008271, GO:0008272, GO:0016020, GO:0055085, GO:0008271, GO:0008272, GO:0016020, GO:0055085, GO:0008272, GO:0015116, GO:0016021
NC_008261.1_142_126	NA	NA	NA	NA	NA	NA	NA	NA	NA	NA	NA	NA	NA	NA	NA	NA	NA	NA	NA	NA	NA	Coils	Coil
NC_008261.1_142_127	195103.CPF_1733	1e-181	642.5	Clostridiaceae	psuK	GO:0003674,GO:0003824,GO:0006793,GO:0006796,GO:0008150,GO:0008152,GO:0009987,GO:0016301,GO:0016310,GO:0016740,GO:0016772,GO:0016773,GO:0044237,GO:0050225	2.7.1.15,2.7.1.45,2.7.1.83	ko:K00852,ko:K00874,ko:K16328	ko00030,ko00240,ko01100,ko01120,ko01200,map00030,map00240,map01100,map01120,map01200	M00061,M00308,M00631	R01051,R01541,R02750,R03315	RC00002,RC00017	ko00000,ko00001,ko00002,ko01000				Bacteria	1TQR4@1239,24AUP@186801,36F1Z@31979,COG0524@1,COG0524@2	NA|NA|NA	G	hmm pf00294	SUPERFAMILY, CDD, Pfam, Gene3D, PANTHER, PANTHER	SSF53613, cd01941, PF00294, G3DSA:3.40.1190.20, PTHR43085:SF14, PTHR43085	YeiC_kinase_like, pfkB family carbohydrate kinase	IPR029056, IPR011611, IPR029056	Ribokinase-like, Carbohydrate kinase PfkB, Ribokinase-like
NC_008261.1_142_128	195103.CPF_1734	1.1e-29	135.2	Clostridiaceae	BT4646												Bacteria	1VKAZ@1239,24UGV@186801,2EG1V@1,339TV@2,36P0Y@31979	NA|NA|NA	S	Domain of unknown function (DUF4250)	Pfam	PF14056	Domain of unknown function (DUF4250)	IPR025346	Protein of unknown function DUF4250
NC_008261.1_142_129	195103.CPF_1735	1.1e-232	812.4	Clostridiaceae													Bacteria	1TP6V@1239,248EF@186801,36E0R@31979,COG0534@1,COG0534@2	NA|NA|NA	V	Na driven multidrug efflux pump	CDD, PANTHER, PIRSF, Pfam, Pfam, TIGRFAM	cd13143, PTHR43823, PIRSF006603, PF01554, PF01554, TIGR00797	MATE_MepA_like, MatE, MatE, matE: MATE efflux family protein	IPR002528, IPR002528, IPR002528, IPR002528	Multi antimicrobial extrusion protein, Multi antimicrobial extrusion protein, Multi antimicrobial extrusion protein, Multi antimicrobial extrusion protein	GO:0006855, GO:0015238, GO:0015297, GO:0016020, GO:0055085, GO:0006855, GO:0015238, GO:0015297, GO:0016020, GO:0055085, GO:0006855, GO:0015238, GO:0015297, GO:0016020, GO:0055085, GO:0006855, GO:0015238, GO:0015297, GO:0016020, GO:0055085	Reactome: R-HSA-425366, Reactome: R-HSA-425366, Reactome: R-HSA-425366, Reactome: R-HSA-425366
NC_008261.1_142_13	195103.CPF_1618	0	3261.1	Clostridiaceae			3.1.3.5,3.2.1.4	ko:K01081,ko:K01179,ko:K06931	ko00230,ko00240,ko00500,ko00760,ko01100,ko01110,map00230,map00240,map00500,map00760,map01100,map01110		R00183,R00511,R00963,R01126,R01227,R01569,R01664,R01968,R02088,R02102,R02323,R02719,R03346,R06200,R11307,R11308	RC00017	ko00000,ko00001,ko01000		GH5,GH9		Bacteria	1VKCH@1239,25EQX@186801,36URQ@31979,COG1387@1,COG1387@2,COG2374@1,COG2374@2,COG5263@1,COG5263@2	NA|NA|NA	E	Lamin Tail Domain	MobiDBLite, Pfam, SUPERFAMILY, Gene3D, MobiDBLite, Pfam, SUPERFAMILY, TIGRFAM, CDD, ProSiteProfiles, ProSiteProfiles, PANTHER, Gene3D	mobidb-lite, PF01336, SSF101756, G3DSA:2.60.40.10, mobidb-lite, PF00932, SSF89550, TIGR01167, cd04486, PS50847, PS51841, PTHR42924, G3DSA:3.20.20.140	consensus disorder prediction, OB-fold nucleic acid binding domain, consensus disorder prediction, Lamin Tail Domain, LPXTG_anchor: LPXTG cell wall anchor domain, YhcR_OBF_like, Gram-positive cocci surface proteins LPxTG motif profile., Lamin-tail (LTD) domain profile.	IPR004365, IPR036700, IPR013783, IPR001322, IPR016195, IPR001322	OB-fold nucleic acid binding domain, AA-tRNA synthetase-type, Bacterial OB-fold superfamily, Immunoglobulin-like fold, Lamin tail domain, Polymerase/histidinol phosphatase-like, Lamin tail domain	GO:0003676, GO:0003824	Reactome: R-HSA-6784531|Reactome: R-HSA-6791226
NC_008261.1_142_130	195103.CPF_1736	2.6e-118	431.4	Clostridiaceae	ssuB1		3.6.3.29	ko:K02017,ko:K02049,ko:K02050,ko:K15555	ko00920,ko02010,map00920,map02010	M00188,M00189,M00436			ko00000,ko00001,ko00002,ko01000,ko02000	3.A.1.16,3.A.1.17,3.A.1.17.2,3.A.1.8		iLJ478.TM0204	Bacteria	1V7QX@1239,24H9Z@186801,36EVS@31979,COG1116@1,COG1116@2	NA|NA|NA	P	ABC transporter	ProSitePatterns, PANTHER, ProSiteProfiles, PANTHER, SUPERFAMILY, Pfam, SMART, Gene3D	PS00211, PTHR42788, PS50893, PTHR42788:SF15, SSF52540, PF00005, SM00382, G3DSA:3.40.50.300	ABC transporters family signature., ATP-binding cassette, ABC transporter-type domain profile., ABC transporter	IPR017871, IPR003439, IPR027417, IPR003439, IPR003593	ABC transporter, conserved site, ABC transporter-like, P-loop containing nucleoside triphosphate hydrolase, ABC transporter-like, AAA+ ATPase domain	GO:0005524, GO:0016887, GO:0005524, GO:0016887, GO:0005524, GO:0016887
NC_008261.1_142_131	195103.CPF_1737	4.7e-129	467.2	Clostridiaceae				ko:K02050		M00188			ko00000,ko00002,ko02000	3.A.1.16,3.A.1.17			Bacteria	1V73W@1239,24A2R@186801,36FJW@31979,COG0600@1,COG0600@2	NA|NA|NA	P	binding-protein-dependent transport systems inner membrane component	PANTHER, ProSiteProfiles, CDD, Pfam, SUPERFAMILY, PANTHER, Gene3D	PTHR30151:SF0, PS50928, cd06261, PF00528, SSF161098, PTHR30151, G3DSA:1.10.3720.10	ABC transporter integral membrane type-1 domain profile., TM_PBP2, Binding-protein-dependent transport system inner membrane component	IPR000515, IPR000515, IPR000515, IPR035906, IPR035906	ABC transporter type 1, transmembrane domain MetI-like, ABC transporter type 1, transmembrane domain MetI-like, ABC transporter type 1, transmembrane domain MetI-like, MetI-like superfamily, MetI-like superfamily	GO:0016020, GO:0055085, GO:0016020, GO:0055085, GO:0016020, GO:0055085
NC_008261.1_142_132	195103.CPF_1738	2.3e-171	608.2	Clostridiaceae				ko:K02051		M00188			ko00000,ko00002,ko02000	3.A.1.16,3.A.1.17			Bacteria	1TT2F@1239,249M2@186801,36F3S@31979,COG0715@1,COG0715@2	NA|NA|NA	P	NMT1/THI5 like	SUPERFAMILY, Pfam, ProSiteProfiles, Gene3D, PANTHER, Gene3D, PIRSF	SSF53850, PF12974, PS51257, G3DSA:3.40.190.10, PTHR30024, G3DSA:3.40.190.10, PIRSF027386	ABC transporter, phosphonate, periplasmic substrate-binding protein, Prokaryotic membrane lipoprotein lipid attachment site profile.	IPR027024	ABC-type uncharacterised transport system, substrate-binding component, TM0202 type
NC_008261.1_142_133	195103.CPF_1739	5.4e-09	65.5	Clostridiaceae													Bacteria	1UQYG@1239,24V9Z@186801,2BB95@1,324RU@2,36PQU@31979	NA|NA|NA			MobiDBLite, MobiDBLite, MobiDBLite	mobidb-lite, mobidb-lite, mobidb-lite	consensus disorder prediction, consensus disorder prediction, consensus disorder prediction
NC_008261.1_142_134	195103.CPF_1740	1.1e-26	125.2	Clostridiaceae													Bacteria	1W4EF@1239,24QJ8@186801,2BWI4@1,2ZRP7@2,36MQY@31979	NA|NA|NA			NA	NA	NA	NA	NA	NA	NA
NC_008261.1_142_135	195103.CPF_1741	3.4e-152	544.3	Clostridiaceae													Bacteria	1V2I2@1239,24GGY@186801,36MB0@31979,COG5464@1,COG5464@2	NA|NA|NA	S	transposase or invertase	Coils	Coil
NC_008261.1_142_136	195103.CPF_1742	2.2e-129	468.4	Clostridiaceae				ko:K07090					ko00000				Bacteria	1UY5F@1239,24AJU@186801,36G95@31979,COG0730@1,COG0730@2	NA|NA|NA	S	Sulfite exporter TauE/SafE	Pfam, PANTHER, PANTHER	PF01925, PTHR43701, PTHR43701	Sulfite exporter TauE/SafE	IPR002781	Transmembrane protein TauE-like	GO:0016021
NC_008261.1_142_137	195103.CPF_1743	2e-73	281.6	Clostridiaceae													Bacteria	1UGJ4@1239,24PM5@186801,29VC9@1,30GSQ@2,36MDD@31979	NA|NA|NA			NA	NA	NA	NA	NA	NA	NA
NC_008261.1_142_138	195103.CPF_1744	5.1e-82	310.5	Clostridiaceae				ko:K03975					ko00000				Bacteria	1VA5P@1239,24ID7@186801,36W25@31979,COG0586@1,COG0586@2	NA|NA|NA	S	SNARE associated Golgi protein	Pfam, PANTHER	PF09335, PTHR42709	SNARE associated Golgi protein	IPR032816	SNARE associated Golgi protein
NC_008261.1_142_139	195103.CPF_1745	3.4e-83	314.3	Clostridiaceae				ko:K03975					ko00000				Bacteria	1VA5P@1239,24ID7@186801,36W25@31979,COG0586@1,COG0586@2	NA|NA|NA	S	SNARE associated Golgi protein	Pfam, Coils, PANTHER	PF09335, Coil, PTHR42709	SNARE associated Golgi protein	IPR032816	SNARE associated Golgi protein
NC_008261.1_142_14	195103.CPF_1619	3.7e-90	337.4	Clostridiaceae													Bacteria	1VHDN@1239,24FXK@186801,36IBF@31979,COG0454@1,COG0456@2	NA|NA|NA	K	acetyltransferase	PANTHER, CDD, SUPERFAMILY, Gene3D, Pfam, ProSiteProfiles	PTHR43617, cd04301, SSF55729, G3DSA:3.40.630.30, PF00583, PS51186	NAT_SF, Acetyltransferase (GNAT) family, Gcn5-related N-acetyltransferase (GNAT) domain profile.	IPR016181, IPR000182, IPR000182	Acyl-CoA N-acyltransferase, GNAT domain, GNAT domain
NC_008261.1_142_140	195103.CPF_1746	2.5e-197	694.5	Clostridiaceae	ttcA	GO:0003674,GO:0003824,GO:0005488,GO:0005575,GO:0005622,GO:0005623,GO:0005737,GO:0005829,GO:0006139,GO:0006396,GO:0006399,GO:0006400,GO:0006725,GO:0006807,GO:0008033,GO:0008150,GO:0008152,GO:0009451,GO:0009987,GO:0010467,GO:0016070,GO:0016740,GO:0016782,GO:0016783,GO:0034227,GO:0034470,GO:0034641,GO:0034660,GO:0043170,GO:0043412,GO:0044237,GO:0044238,GO:0044424,GO:0044444,GO:0044464,GO:0046483,GO:…	6.3.4.19	ko:K04075,ko:K14058			R09597	RC02633,RC02634	ko00000,ko01000,ko03016				Bacteria	1TQ0Y@1239,247RP@186801,36DIN@31979,COG0037@1,COG0037@2	NA|NA|NA	H	Belongs to the TtcA family	PANTHER, Gene3D, PIRSF, SUPERFAMILY, PANTHER, Pfam, CDD	PTHR43686, G3DSA:3.40.50.620, PIRSF004976, SSF52402, PTHR43686:SF2, PF01171, cd01993	PP-loop family, Alpha_ANH_like_II	IPR014729, IPR035107, IPR011063	Rossmann-like alpha/beta/alpha sandwich fold, tRNA thiolation protein, TtcA/Ctu1 type, tRNA(Ile)-lysidine/2-thiocytidine synthase, N-terminal	GO:0008033	Reactome: R-HSA-6782315, Reactome: R-HSA-6782315
NC_008261.1_142_141	195103.CPF_1747	3.2e-40	170.6	Clostridiaceae			1.1.1.3	ko:K00003,ko:K07166	ko00260,ko00270,ko00300,ko01100,ko01110,ko01120,ko01130,ko01230,map00260,map00270,map00300,map01100,map01110,map01120,map01130,map01230	M00017,M00018	R01773,R01775	RC00087	ko00000,ko00001,ko00002,ko01000				Bacteria	1VENW@1239,24QNV@186801,36KHG@31979,COG3830@1,COG3830@2	NA|NA|NA	T	Belongs to the UPF0237 family	PANTHER, Hamap, PANTHER, CDD, Pfam, Gene3D, SUPERFAMILY, ProSiteProfiles	PTHR34875:SF2, MF_01054, PTHR34875, cd04872, PF13740, G3DSA:3.30.70.260, SSF55021, PS51671	UPF0237 protein <locus_tag>., ACT_1ZPV, ACT domain, ACT domain profile.	IPR022986, IPR022986, IPR002912	Uncharacterised protein family UPF0237, ACT-type, Uncharacterised protein family UPF0237, ACT-type, ACT domain
NC_008261.1_142_142	195103.CPF_1748	1.3e-251	875.2	Clostridiaceae				ko:K09157					ko00000				Bacteria	1TQG8@1239,247K4@186801,36DX6@31979,COG2848@1,COG2848@2	NA|NA|NA	S	UPF0210 protein	PANTHER, Hamap, Pfam, PANTHER, Gene3D, SUPERFAMILY, CDD	PTHR37560:SF1, MF_01221, PF05167, PTHR37560, G3DSA:3.20.70.20, SSF51998, cd08025	UPF0210 protein <locus_tag>., Uncharacterised ACR (DUF711), RNR_PFL_like_DUF711	IPR007841, IPR007841, IPR007841, IPR007841	Uncharacterised protein family UPF0210, Uncharacterised protein family UPF0210, Uncharacterised protein family UPF0210, Uncharacterised protein family UPF0210
NC_008261.1_142_143	195103.CPF_1749	6.2e-85	320.1	Clostridiaceae													Bacteria	1V9YK@1239,24N9H@186801,36HY4@31979,COG4708@1,COG4708@2	NA|NA|NA	S	membrane	Gene3D, PIRSF, PANTHER, Pfam	G3DSA:1.10.1760.20, PIRSF031501, PTHR40044, PF06177	QueT transporter	IPR010387, IPR010387, IPR010387	Queuosine precursor transporter QueT, Queuosine precursor transporter QueT, Queuosine precursor transporter QueT	GO:0005886, GO:0005886, GO:0005886
NC_008261.1_142_144	195103.CPF_1750	1e-159	569.3	Clostridiaceae				ko:K02238		M00429			ko00000,ko00002,ko02044	3.A.11.1,3.A.11.2			Bacteria	1TS9U@1239,249VR@186801,36DFY@31979,COG2333@1,COG2333@2	NA|NA|NA	L	domain protein	PANTHER, SUPERFAMILY, PANTHER, Pfam, SMART, ProSiteProfiles, CDD, Gene3D	PTHR30619:SF1, SSF56281, PTHR30619, PF00753, SM00849, PS51257, cd07731, G3DSA:3.60.15.10	Metallo-beta-lactamase superfamily, Prokaryotic membrane lipoprotein lipid attachment site profile., ComA-like_MBL-fold	IPR036866, IPR001279, IPR001279, IPR035681, IPR036866	Ribonuclease Z/Hydroxyacylglutathione hydrolase-like, Metallo-beta-lactamase, Metallo-beta-lactamase, ComA-like, MBL domain, Ribonuclease Z/Hydroxyacylglutathione hydrolase-like
NC_008261.1_142_145	195103.CPF_1751	1.3e-238	832	Clostridia	regB		2.7.13.3	ko:K07717,ko:K15011	ko02020,map02020	M00518,M00523			ko00000,ko00001,ko00002,ko01000,ko01001,ko02022				Bacteria	1V7G1@1239,25ER0@186801,COG0642@1,COG0642@2	NA|NA|NA	T	GHKL domain	SUPERFAMILY, Gene3D, Pfam, CDD, PANTHER	SSF55874, G3DSA:3.30.565.10, PF14501, cd00075, PTHR40448	GHKL domain, HATPase_c	IPR036890, IPR036890, IPR032834, IPR003594	Histidine kinase/HSP90-like ATPase superfamily, Histidine kinase/HSP90-like ATPase superfamily, Sensor histidine kinase NatK, C-terminal domain, Histidine kinase/HSP90-like ATPase
NC_008261.1_142_146	195103.CPF_1752	8.9e-130	469.5	Clostridiaceae	rgaR												Bacteria	1V7ED@1239,24J9V@186801,36KE5@31979,COG3279@1,COG3279@2	NA|NA|NA	T	Response regulator receiver domain	PANTHER, PANTHER, CDD, SMART, PANTHER, PANTHER, Gene3D, ProSiteProfiles, Gene3D, Coils, SUPERFAMILY, Pfam, SMART, ProSiteProfiles, Pfam	PTHR43412:SF1, PTHR43412:SF1, cd00156, SM00850, PTHR43412, PTHR43412, G3DSA:3.40.50.2300, PS50110, G3DSA:2.40.50.1020, Coil, SSF52172, PF00072, SM00448, PS50930, PF04397	REC, Response regulatory domain profile., Response regulator receiver domain, LytTR-type HTH domain profile., LytTr DNA-binding domain	IPR001789, IPR007492, IPR001789, IPR011006, IPR001789, IPR001789, IPR007492, IPR007492	Signal transduction response regulator, receiver domain, LytTR DNA-binding domain, Signal transduction response regulator, receiver domain, CheY-like superfamily, Signal transduction response regulator, receiver domain, Signal transduction response regulator, receiver domain, LytTR DNA-binding domain, LytTR DNA-binding domain	GO:0000160, GO:0003677, GO:0000160, GO:0000160, GO:0000160, GO:0003677, GO:0003677
NC_008261.1_142_147	195103.CPF_1753	1.7e-190	671.8	Clostridiaceae			3.5.1.28	ko:K01448	ko01503,map01503	M00727	R04112	RC00064,RC00141	ko00000,ko00001,ko00002,ko01000,ko01011,ko03036				Bacteria	1V7G8@1239,248ER@186801,36E0H@31979,COG0860@1,COG0860@2	NA|NA|NA	M	N-acetylmuramoyl-L-alanine amidase	Pfam, CDD, Gene3D, SMART, PANTHER, SUPERFAMILY, PANTHER	PF01520, cd02696, G3DSA:3.40.630.40, SM00646, PTHR30404:SF4, SSF53187, PTHR30404	N-acetylmuramoyl-L-alanine amidase, MurNAc-LAA	IPR002508, IPR002508, IPR002508	N-acetylmuramoyl-L-alanine amidase, catalytic domain, N-acetylmuramoyl-L-alanine amidase, catalytic domain, N-acetylmuramoyl-L-alanine amidase, catalytic domain	GO:0008745, GO:0009253, GO:0008745, GO:0009253, GO:0008745, GO:0009253
NC_008261.1_142_148	195103.CPF_1754	1.6e-45	188.3	Clostridiaceae	M1-594												Bacteria	1VBWM@1239,25DPD@186801,36UDS@31979,COG0011@1,COG0011@2	NA|NA|NA	S	Thiamine-binding protein	PANTHER, PANTHER, Pfam, SUPERFAMILY, Gene3D	PTHR33777:SF5, PTHR33777, PF01910, SSF89957, G3DSA:3.30.70.930	Thiamine-binding protein	IPR002767, IPR029756, IPR029756	Thiamine-binding protein, MTH1187/YkoF-like, MTH1187/YkoF-like
NC_008261.1_142_149	195103.CPF_1755	2.4e-176	624.8	Clostridiaceae	rpfB	GO:0005575,GO:0005576,GO:0008150,GO:0009892,GO:0009893,GO:0010468,GO:0010604,GO:0010605,GO:0010628,GO:0010629,GO:0019222,GO:0022611,GO:0032502,GO:0040008,GO:0040009,GO:0040010,GO:0044111,GO:0044114,GO:0044115,GO:0044403,GO:0044419,GO:0045927,GO:0048518,GO:0048519,GO:0050789,GO:0051704,GO:0060255,GO:0065007,GO:0085016		ko:K21687,ko:K21688					ko00000		GH23		Bacteria	1TTIK@1239,24997@186801,36DTZ@31979,COG3583@1,COG3583@2,COG3584@1,COG3584@2	NA|NA|NA	S	G5 domain protein	Pfam, Pfam, PANTHER, SUPERFAMILY, SMART, Gene3D, Pfam, Gene3D, ProSiteProfiles, Pfam, CDD	PF03990, PF03990, PTHR39160, SSF50685, SM01208, G3DSA:2.40.40.10, PF07501, G3DSA:2.20.230.10, PS51109, PF06725, cd14667	Domain of unknown function (DUF348), Domain of unknown function (DUF348), G5 domain, G5 domain profile., 3D domain, 3D_containing_proteins	IPR007137, IPR007137, IPR036908, IPR011098, IPR036908, IPR011098, IPR011098, IPR010611	Resuscitation-promoting factor, domain of unknown function DUF348, Resuscitation-promoting factor, domain of unknown function DUF348, RlpA-like domain superfamily, G5 domain, RlpA-like domain superfamily, G5 domain, G5 domain, 3D domain	GO:0004553, GO:0009254, GO:0019867
NC_008261.1_142_15	195103.CPF_1620	2.2e-153	548.1	Clostridiaceae			3.1.3.15	ko:K04486	ko00340,ko01100,ko01110,ko01230,map00340,map01100,map01110,map01230	M00026	R03013	RC00017	ko00000,ko00001,ko00002,ko01000				Bacteria	1TQQX@1239,24ATG@186801,36WSQ@31979,COG1387@1,COG1387@2	NA|NA|NA	E	Histidinol phosphate phosphatase, HisJ family	SUPERFAMILY, Gene3D, Coils, Pfam, PANTHER, CDD	SSF89550, G3DSA:3.20.20.140, Coil, PF02811, PTHR21039, cd12110	PHP domain, PHP_HisPPase_Hisj_like	IPR016195, IPR004013, IPR010140	Polymerase/histidinol phosphatase-like, PHP domain, Histidinol phosphate phosphatase, HisJ	GO:0003824, GO:0003824, GO:0000105, GO:0004401	Reactome: R-HSA-6784531|Reactome: R-HSA-6791226, KEGG: 00340+3.1.3.15
NC_008261.1_142_150	195103.CPF_1756	1.9e-223	781.6	Clostridiaceae	uraA	GO:0003674,GO:0005215,GO:0005350,GO:0005575,GO:0005623,GO:0005886,GO:0005887,GO:0006810,GO:0006855,GO:0008150,GO:0015205,GO:0015210,GO:0015238,GO:0015851,GO:0015855,GO:0015857,GO:0015893,GO:0016020,GO:0016021,GO:0022857,GO:0031224,GO:0031226,GO:0042221,GO:0042493,GO:0044425,GO:0044459,GO:0044464,GO:0050896,GO:0051179,GO:0051234,GO:0055085,GO:0071702,GO:0071705,GO:0071944,GO:0072531,GO:1903791,GO:…		ko:K02824,ko:K03458					ko00000,ko02000	2.A.40,2.A.40.1.1,2.A.40.1.2		iSFxv_1172.SFxv_2795,iS_1188.S2690	Bacteria	1TQKX@1239,2485Z@186801,36DN5@31979,COG2233@1,COG2233@2	NA|NA|NA	F	Permease	PANTHER, ProSitePatterns, PANTHER, Pfam, TIGRFAM	PTHR11119, PS01116, PTHR11119:SF49, PF00860, TIGR00801	Xanthine/uracil permeases family signature., Permease family, ncs2: uracil-xanthine permease	IPR006042, IPR029935, IPR006043, IPR006042	Xanthine/uracil permease, Uracil permease, Xanthine/uracil/vitamin C permease, Xanthine/uracil permease	GO:0005215, GO:0016020, GO:0055085, GO:0015210, GO:0015857, GO:0016021, GO:0016020, GO:0022857, GO:0055085, GO:0005215, GO:0016020, GO:0055085	Reactome: R-HSA-196836, Reactome: R-HSA-196836
NC_008261.1_142_151	195103.CPF_1757	2.2e-301	1040.8	Clostridiaceae	ybiT	GO:0006950,GO:0008150,GO:0009266,GO:0009409,GO:0009628,GO:0050896		ko:K06158					ko00000,ko03012				Bacteria	1TPW0@1239,248ST@186801,36E0B@31979,COG0488@1,COG0488@2	NA|NA|NA	S	ABC transporter	CDD, Coils, Pfam, Pfam, Pfam, SUPERFAMILY, ProSiteProfiles, ProSiteProfiles, SMART, Gene3D, PANTHER, Gene3D, SUPERFAMILY, PANTHER, CDD	cd03221, Coil, PF00005, PF00005, PF12848, SSF52540, PS50893, PS50893, SM00382, G3DSA:3.40.50.300, PTHR19211, G3DSA:3.40.50.300, SSF52540, PTHR19211:SF96, cd03221	ABCF_EF-3, ABC transporter, ABC transporter, ABC transporter, ATP-binding cassette, ABC transporter-type domain profile., ATP-binding cassette, ABC transporter-type domain profile., ABCF_EF-3	IPR003439, IPR003439, IPR032781, IPR027417, IPR003439, IPR003439, IPR003593, IPR027417	ABC transporter-like, ABC transporter-like, ABC-transporter extension domain, P-loop containing nucleoside triphosphate hydrolase, ABC transporter-like, ABC transporter-like, AAA+ ATPase domain, P-loop containing nucleoside triphosphate hydrolase	GO:0005524, GO:0016887, GO:0005524, GO:0016887, GO:0005524, GO:0016887, GO:0005524, GO:0016887
NC_008261.1_142_152	195103.CPF_1758	1.3e-176	625.5	Clostridiaceae													Bacteria	1TYRH@1239,24GVR@186801,36I2Q@31979,COG0726@1,COG0726@2	NA|NA|NA	G	deacetylase	Gene3D, ProSiteProfiles, PANTHER, CDD, Pfam, PANTHER, SUPERFAMILY	G3DSA:3.20.20.370, PS51677, PTHR10587:SF97, cd10944, PF01522, PTHR10587, SSF88713	NodB homology domain profile., CE4_SmPgdA_like, Polysaccharide deacetylase	IPR002509, IPR002509, IPR011330	NodB homology domain, NodB homology domain, Glycoside hydrolase/deacetylase, beta/alpha-barrel	GO:0005975, GO:0016810, GO:0005975, GO:0016810, GO:0003824, GO:0005975
NC_008261.1_142_153	195103.CPF_1759	0	1172.5	Firmicutes													Bacteria	1UIS1@1239,COG4409@1,COG4409@2	NA|NA|NA	G	BNR repeat-like domain	SUPERFAMILY, CDD, Gene3D, Pfam, Gene3D, SUPERFAMILY, ProSiteProfiles, Pfam	SSF49899, cd15482, G3DSA:2.120.10.10, PF13088, G3DSA:2.60.120.200, SSF50939, PS50025, PF13385	Sialidase_non-viral, BNR repeat-like domain, Laminin G domain profile., Concanavalin A-like lectin/glucanases superfamily	IPR013320, IPR011040, IPR036278, IPR001791	Concanavalin A-like lectin/glucanase domain superfamily, Sialidase, Sialidase superfamily, Laminin G domain		KEGG: 00511+3.2.1.18|KEGG: 00600+3.2.1.18|Reactome: R-HSA-1660662|Reactome: R-HSA-4085001, KEGG: 00511+3.2.1.18|KEGG: 00600+3.2.1.18|Reactome: R-HSA-1660662|Reactome: R-HSA-4085001
NC_008261.1_142_154	195103.CPF_1760	0	1322.4	Clostridiaceae	topB		5.99.1.2	ko:K03168,ko:K03169,ko:K07479					ko00000,ko01000,ko03032,ko03400				Bacteria	1TPJD@1239,24810@186801,36DHG@31979,COG0550@1,COG0550@2,COG0551@1,COG0551@2	NA|NA|NA	L	Releases the supercoiling and torsional tension of DNA, which is introduced during the DNA replication and transcription, by transiently cleaving and rejoining one strand of the DNA duplex. Introduces a single-strand break via transesterification at a target site in duplex DNA. The scissile phosphodiester is attacked by the catalytic tyrosine of the enzyme, resulting in the formation of a DNA-(5-…	Coils, Hamap, SUPERFAMILY, Gene3D, Gene3D, ProSitePatterns, Pfam, SMART, Gene3D, PANTHER, SMART, Pfam, Gene3D, SMART, CDD, CDD, PRINTS, PRINTS, PRINTS, PRINTS, PRINTS, PANTHER, ProSiteProfiles, TIGRFAM	Coil, MF_00953, SSF56712, G3DSA:1.10.460.10, G3DSA:2.70.20.10, PS00396, PF01131, SM00437, G3DSA:3.40.50.140, PTHR11390:SF21, SM00493, PF01751, G3DSA:1.10.290.10, SM00436, cd00186, cd03362, PR00417, PR00417, PR00417, PR00417, PR00417, PTHR11390, PS50880, TIGR01056	DNA topoisomerase 3 [topB]., Prokaryotic DNA topoisomerase I active site., DNA topoisomerase, Toprim domain, TOP1Ac, TOPRIM_TopoIA_TopoIII, Prokaryotic DNA topoisomerase I signature, Prokaryotic DNA topoisomerase I signature, Prokaryotic DNA topoisomerase I signature, Prokaryotic DNA topoisomerase I signature, Prokaryotic DNA topoisomerase I signature, Toprim domain profile., topB: DNA topoisomer…	IPR005738, IPR023405, IPR013824, IPR013825, IPR023406, IPR013497, IPR003602, IPR006171, IPR006171, IPR013826, IPR003601, IPR013497, IPR034144, IPR013497, IPR013497, IPR013497, IPR013497, IPR013497, IPR000380, IPR006171, IPR005738	DNA topoisomerase III, DNA topoisomerase, type IA, core domain, DNA topoisomerase, type IA, central region, subdomain 1, DNA topoisomerase, type IA, central region, subdomain 2, DNA topoisomerase, type IA, active site, DNA topoisomerase, type IA, central, DNA topoisomerase, type IA, DNA-binding domain, TOPRIM domain, TOPRIM domain, DNA topoisomerase, type IA, central region, subdomain 3, DNA topo…	GO:0003677, GO:0003916, GO:0006265, GO:0003917, GO:0003677, GO:0003916, GO:0006265, GO:0003677, GO:0003916, GO:0006265, GO:0003677, GO:0003916, GO:0006265, GO:0003677, GO:0003916, GO:0006265, GO:0003677, GO:0003916, GO:0006265, GO:0003677, GO:0003916, GO:0006265, GO:0003677, GO:0003916, GO:0006265, GO:0003677, GO:0003916, GO:0006265, GO:0003677, GO:0003916, GO:0006265, GO:0003677, GO:0003917, GO:…
NC_008261.1_142_155	195103.CPF_1761	1e-241	842.4	Clostridiaceae	ydbT			ko:K08981					ko00000				Bacteria	1TSRJ@1239,24FG2@186801,36GWZ@31979,COG3428@1,COG3428@2	NA|NA|NA	S	membrane	PANTHER, Pfam, Pfam, PANTHER, PIRSF	PTHR34473, PF03703, PF03703, PTHR34473:SF1, PIRSF026631	Bacterial PH domain, Bacterial PH domain	IPR005182, IPR005182, IPR014529	Domain of unknown function DUF304, Domain of unknown function DUF304, Uncharacterised conserved protein UCP026631
NC_008261.1_142_156	NA	NA	NA	NA	NA	NA	NA	NA	NA	NA	NA	NA	NA	NA	NA	NA	NA	NA	NA	NA	NA	PANTHER, Pfam	PTHR34473, PF03703	Bacterial PH domain	IPR005182	Domain of unknown function DUF304
NC_008261.1_142_158	195103.CPF_1764	0	1726.1	Clostridiaceae													Bacteria	1TQMV@1239,247SE@186801,36ERF@31979,COG0642@1,COG2205@2,COG3292@1,COG3292@2	NA|NA|NA	T	PhoQ Sensor	SUPERFAMILY, PANTHER, PANTHER, PANTHER, PANTHER, SUPERFAMILY, Gene3D, SUPERFAMILY, CDD, SUPERFAMILY, Pfam, Coils, Pfam, Pfam, Pfam, Pfam, Pfam, Pfam, Pfam, Pfam, Pfam, CDD, Gene3D, Pfam, Gene3D, SMART, Gene3D, PRINTS, PRINTS, PRINTS, PRINTS, SMART, ProSiteProfiles, SUPERFAMILY, Gene3D, PANTHER, PANTHER, PANTHER, PANTHER, Pfam	SSF63829, PTHR43547:SF8, PTHR43547:SF8, PTHR43547, PTHR43547, SSF47384, G3DSA:2.130.10.10, SSF63829, cd00082, SSF63829, PF02518, Coil, PF07494, PF07494, PF07494, PF07494, PF07494, PF07494, PF07494, PF07494, PF07494, cd00075, G3DSA:2.130.10.10, PF07495, G3DSA:1.10.287.130, SM00388, G3DSA:2.60.40.10, PR00344, PR00344, PR00344, PR00344, SM00387, PS50109, SSF55874, G3DSA:3.30.565.10, PTHR43547, PTHR4…	HisKA, Histidine kinase-, DNA gyrase B-, and HSP90-like ATPase, Two component regulator propeller, Two component regulator propeller, Two component regulator propeller, Two component regulator propeller, Two component regulator propeller, Two component regulator propeller, Two component regulator propeller, Two component regulator propeller, Two component regulator propeller, HATPase_c, Y_Y_Y dom…	IPR036097, IPR015943, IPR003661, IPR003594, IPR011110, IPR011110, IPR011110, IPR011110, IPR011110, IPR011110, IPR011110, IPR011110, IPR011110, IPR003594, IPR015943, IPR011123, IPR003661, IPR013783, IPR004358, IPR004358, IPR004358, IPR004358, IPR003594, IPR005467, IPR036890, IPR036890, IPR003661	Signal transduction histidine kinase, dimerisation/phosphoacceptor domain superfamily, WD40/YVTN repeat-like-containing domain superfamily, Signal transduction histidine kinase, dimerisation/phosphoacceptor domain, Histidine kinase/HSP90-like ATPase, Two component regulator propeller, Two component regulator propeller, Two component regulator propeller, Two component regulator propeller, Two comp…	GO:0000155, GO:0007165, GO:0005515, GO:0000155, GO:0007165, GO:0005515, GO:0000155, GO:0007165, GO:0016310, GO:0016772, GO:0016310, GO:0016772, GO:0016310, GO:0016772, GO:0016310, GO:0016772, GO:0000155, GO:0007165	Reactome: R-HSA-70895, Reactome: R-HSA-70895, Reactome: R-HSA-70895, Reactome: R-HSA-70895, Reactome: R-HSA-204174|Reactome: R-HSA-5362517
NC_008261.1_142_159	195103.CPF_1765	4.2e-203	713.8	Clostridiaceae													Bacteria	1TQHP@1239,248TG@186801,28IAA@1,2Z8CW@2,36F51@31979	NA|NA|NA	S	DHHW protein	Pfam	PF14286	DHHW protein	IPR025945	DHHW protein
NC_008261.1_142_16	195103.CPF_1621	7.4e-239	832.8	Clostridiaceae				ko:K03308					ko00000	2.A.22.4,2.A.22.5			Bacteria	1TP6B@1239,2485D@186801,36DFC@31979,COG0733@1,COG0733@2	NA|NA|NA	S	Belongs to the sodium neurotransmitter symporter (SNF) (TC 2.A.22) family	CDD, PRINTS, PRINTS, PRINTS, Pfam, Pfam, ProSiteProfiles, PANTHER, SUPERFAMILY	cd10336, PR00176, PR00176, PR00176, PF00209, PF00209, PS50267, PTHR42948, SSF161070	SLC6sbd_Tyt1-Like, Sodium/chloride neurotransmitter symporter signature, Sodium/chloride neurotransmitter symporter signature, Sodium/chloride neurotransmitter symporter signature, Sodium:neurotransmitter symporter family, Sodium:neurotransmitter symporter family, Sodium:neurotransmitter symporter family profile.	IPR000175, IPR000175, IPR000175, IPR000175, IPR000175, IPR000175, IPR037272	Sodium:neurotransmitter symporter, Sodium:neurotransmitter symporter, Sodium:neurotransmitter symporter, Sodium:neurotransmitter symporter, Sodium:neurotransmitter symporter, Sodium:neurotransmitter symporter, Sodium:neurotransmitter symporter superfamily	GO:0005328, GO:0006836, GO:0016021, GO:0005328, GO:0006836, GO:0016021, GO:0005328, GO:0006836, GO:0016021, GO:0005328, GO:0006836, GO:0016021, GO:0005328, GO:0006836, GO:0016021, GO:0005328, GO:0006836, GO:0016021, GO:0005328
NC_008261.1_142_160	195103.CPF_1766	3.4e-250	870.5	Clostridiaceae	algI			ko:K19294					ko00000				Bacteria	1TP52@1239,248V4@186801,36DV2@31979,COG1696@1,COG1696@2	NA|NA|NA	M	membrane protein involved in D-alanine export	PIRSF, PANTHER, PIRSF, Pfam, PANTHER	PIRSF016636, PTHR13285, PIRSF500217, PF03062, PTHR13285:SF18	MBOAT, membrane-bound O-acyltransferase family	IPR024194, IPR028362, IPR004299	Alginate O-acetyltransferase AlgI/D-alanyl transfer protein DltB, Alginate O-acetyltransferase AlgI, Membrane bound O-acyl transferase, MBOAT	GO:0042121
NC_008261.1_142_161	195103.CPF_1767	5.2e-84	317	Clostridiaceae													Bacteria	1VETI@1239,24PTP@186801,2E7J6@1,3321F@2,36KU0@31979	NA|NA|NA	S	Domain of unknown function (DUF4358)	Pfam, ProSiteProfiles	PF14270, PS51257	Domain of unknown function (DUF4358), Prokaryotic membrane lipoprotein lipid attachment site profile.	IPR025648	Protein of unknown function DUF4358
NC_008261.1_142_162	195103.CPF_1768	4e-218	763.8	Clostridiaceae	yfmL	GO:0003674,GO:0003724,GO:0003824,GO:0004004,GO:0004386,GO:0005575,GO:0005622,GO:0005623,GO:0005737,GO:0006139,GO:0006725,GO:0006807,GO:0008026,GO:0008150,GO:0008152,GO:0008186,GO:0009987,GO:0010501,GO:0016070,GO:0016462,GO:0016787,GO:0016817,GO:0016818,GO:0016887,GO:0017111,GO:0034641,GO:0042623,GO:0043170,GO:0044237,GO:0044238,GO:0044424,GO:0044464,GO:0046483,GO:0070035,GO:0071704,GO:0090304,GO:…	3.6.4.13	ko:K05592	ko03018,map03018				ko00000,ko00001,ko01000,ko03009,ko03019				Bacteria	1TQ9R@1239,249Z4@186801,36DKG@31979,COG0513@1,COG0513@2	NA|NA|NA	L	DEAD DEAH box helicase	Pfam, PANTHER, SMART, MobiDBLite, SUPERFAMILY, ProSiteProfiles, ProSiteProfiles, PANTHER, ProSiteProfiles, Pfam, Gene3D, CDD, SMART, Gene3D	PF00270, PTHR24031:SF366, SM00490, mobidb-lite, SSF52540, PS51192, PS51194, PTHR24031, PS51195, PF00271, G3DSA:3.40.50.300, cd00079, SM00487, G3DSA:3.40.50.300	DEAD/DEAH box helicase, consensus disorder prediction, Superfamilies 1 and 2 helicase ATP-binding type-1 domain profile., Superfamilies 1 and 2 helicase C-terminal domain profile., DEAD-box RNA helicase Q motif profile., Helicase conserved C-terminal domain, HELICc	IPR011545, IPR001650, IPR027417, IPR014001, IPR001650, IPR014014, IPR001650, IPR001650, IPR014001	DEAD/DEAH box helicase domain, Helicase, C-terminal, P-loop containing nucleoside triphosphate hydrolase, Helicase superfamily 1/2, ATP-binding domain, Helicase, C-terminal, RNA helicase, DEAD-box type, Q motif, Helicase, C-terminal, Helicase, C-terminal, Helicase superfamily 1/2, ATP-binding domain	GO:0003676, GO:0005524
NC_008261.1_142_163	195103.CPF_1769	3.1e-50	204.1	Clostridiaceae													Bacteria	1UG5M@1239,24MWX@186801,29V5D@1,30GJ0@2,36M0Z@31979	NA|NA|NA			Coils	Coil
NC_008261.1_142_164	195103.CPF_1770	1.4e-253	881.7	Clostridiaceae	gdhA		1.4.1.4	ko:K00262	ko00220,ko00250,ko00910,ko01100,map00220,map00250,map00910,map01100		R00248	RC00006,RC02799	ko00000,ko00001,ko01000				Bacteria	1TP45@1239,24960@186801,36EGU@31979,COG0334@1,COG0334@2	NA|NA|NA	E	Belongs to the Glu Leu Phe Val dehydrogenases family	Pfam, Gene3D, PRINTS, PRINTS, PRINTS, PRINTS, SUPERFAMILY, Gene3D, PANTHER, CDD, ProSitePatterns, SUPERFAMILY, Pfam, Gene3D, Gene3D, PIRSF, SMART	PF02812, G3DSA:3.40.50.10860, PR00082, PR00082, PR00082, PR00082, SSF53223, G3DSA:3.40.50.720, PTHR43571, cd05313, PS00074, SSF51735, PF00208, G3DSA:1.10.285.10, G3DSA:1.10.285.10, PIRSF000185, SM00839	Glu/Leu/Phe/Val dehydrogenase, dimerisation domain, Glutamate/leucine/phenylalanine/valine dehydrogenase signature, Glutamate/leucine/phenylalanine/valine dehydrogenase signature, Glutamate/leucine/phenylalanine/valine dehydrogenase signature, Glutamate/leucine/phenylalanine/valine dehydrogenase signature, NAD_bind_2_Glu_DH, Glu / Leu / Phe / Val dehydrogenases active site., Glutamate/Leucine/Phe…	IPR006097, IPR006095, IPR006095, IPR006095, IPR006095, IPR033922, IPR033524, IPR036291, IPR006096, IPR014362, IPR006096	Glutamate/phenylalanine/leucine/valine dehydrogenase, dimerisation domain, Glutamate/phenylalanine/leucine/valine dehydrogenase, Glutamate/phenylalanine/leucine/valine dehydrogenase, Glutamate/phenylalanine/leucine/valine dehydrogenase, Glutamate/phenylalanine/leucine/valine dehydrogenase, NAD(P) binding domain of glutamate dehydrogenase, Leu/Phe/Val dehydrogenases active site, NAD(P)-binding dom…	GO:0006520, GO:0016491, GO:0055114, GO:0006520, GO:0016491, GO:0055114, GO:0006520, GO:0016491, GO:0055114, GO:0006520, GO:0016491, GO:0055114, GO:0006520, GO:0016491, GO:0055114, GO:0016639, GO:0006520, GO:0016491, GO:0055114, GO:0016639, GO:0055114, GO:0006520, GO:0016491, GO:0055114	Reactome: R-HSA-2151201|Reactome: R-HSA-70614, Reactome: R-HSA-2151201|Reactome: R-HSA-70614, Reactome: R-HSA-2151201|Reactome: R-HSA-70614, Reactome: R-HSA-2151201|Reactome: R-HSA-70614, Reactome: R-HSA-2151201|Reactome: R-HSA-70614, Reactome: R-HSA-2151201|Reactome: R-HSA-70614, Reactome: R-HSA-2151201|Reactome: R-HSA-70614, Reactome: R-HSA-2151201|Reactome: R-HSA-70614, Reactome: R-HSA-2151201…
NC_008261.1_142_165	573061.Clocel_3184	8.7e-15	87	Clostridiaceae													Bacteria	1VGJB@1239,24MAT@186801,2E823@1,332G5@2,36MS7@31979	NA|NA|NA			NA	NA	NA	NA	NA	NA	NA
NC_008261.1_142_166	195103.CPF_1772	1e-198	699.1	Clostridiaceae	ilvE		2.6.1.42	ko:K00826	ko00270,ko00280,ko00290,ko00770,ko01100,ko01110,ko01130,ko01210,ko01230,map00270,map00280,map00290,map00770,map01100,map01110,map01130,map01210,map01230	M00019,M00036,M00119,M00570	R01090,R01214,R02199,R10991	RC00006,RC00036	ko00000,ko00001,ko00002,ko01000,ko01007				Bacteria	1TQQI@1239,2480D@186801,36E7V@31979,COG0115@1,COG0115@2	NA|NA|NA	E	Branched-chain amino acid aminotransferase	PIRSF, ProSitePatterns, Gene3D, Gene3D, SUPERFAMILY, PANTHER, CDD, Pfam, PANTHER, TIGRFAM	PIRSF006468, PS00770, G3DSA:3.30.470.10, G3DSA:3.20.10.10, SSF56752, PTHR42825:SF2, cd01557, PF01063, PTHR42825, TIGR01123	Aminotransferases class-IV signature., BCAT_beta_family, Amino-transferase class IV, ilvE_II: branched-chain amino acid aminotransferase	IPR005786, IPR018300, IPR036038, IPR033939, IPR001544, IPR005786	Branched-chain amino acid aminotransferase II, Aminotransferase, class IV, conserved site, Aminotransferase-like, PLP-dependent enzymes, Branched-chain aminotransferase, Aminotransferase class IV, Branched-chain amino acid aminotransferase II	GO:0004084, GO:0009081, GO:0003824, GO:0003824, GO:0004084, GO:0009081, GO:0003824, GO:0004084, GO:0009081	KEGG: 00270+2.6.1.42|KEGG: 00280+2.6.1.42|KEGG: 00290+2.6.1.42|KEGG: 00770+2.6.1.42|KEGG: 00966+2.6.1.42|MetaCyc: PWY-5057|MetaCyc: PWY-5076|MetaCyc: PWY-5078|MetaCyc: PWY-5101|MetaCyc: PWY-5103|MetaCyc: PWY-5104|MetaCyc: PWY-5108|MetaCyc: PWY-7767|Reactome: R-HSA-70895, Reactome: R-HSA-70895, Reactome: R-HSA-70895, KEGG: 00270+2.6.1.42|KEGG: 00280+2.6.1.42|KEGG: 00290+2.6.1.42|KEGG: 00770+2.6.1.…
NC_008261.1_142_168	195103.CPF_1774	2.4e-98	364.8	Clostridiaceae													Bacteria	1VNMG@1239,24MME@186801,2EDN1@1,337HU@2,36KKM@31979	NA|NA|NA			NA	NA	NA	NA	NA	NA	NA
NC_008261.1_142_169	195103.CPF_1775	5.2e-170	603.6	Clostridiaceae	hopD2		3.1.3.25,3.1.3.48	ko:K01092,ko:K01104	ko00521,ko00562,ko01100,ko04070,map00521,map00562,map01100,map04070	M00131	R01185,R01186,R01187	RC00078	ko00000,ko00001,ko00002,ko01000				Bacteria	1UY4B@1239,2483U@186801,36FC3@31979,COG2453@1,COG2453@2	NA|NA|NA	T	Inositol hexakisphosphate	ProSiteProfiles, SMART, ProDom, Pfam, SUPERFAMILY, ProSitePatterns, Gene3D, Gene3D	PS50056, SM01301, PD069361, PF14566, SSF52799, PS00383, G3DSA:3.90.190.10, G3DSA:3.30.70.1690	Tyrosine specific protein phosphatases family profile., HYDROLASE VIRULENCE PLASMID AVRBS1.1 HEXAPHOSPHATE TYROSINE PHOSPHOHYDROLASE PRECURSOR MYO-INOSITOL AVIRULENCE, Inositol hexakisphosphate, Tyrosine specific protein phosphatases active site.	IPR000387, IPR029021, IPR016130, IPR029021	Tyrosine specific protein phosphatases domain, Protein-tyrosine phosphatase-like, Protein-tyrosine phosphatase, active site, Protein-tyrosine phosphatase-like	GO:0016311, GO:0016791, GO:0004725, GO:0016311
NC_008261.1_142_17	195103.CPF_1622	2.5e-116	424.9	Clostridiaceae	thiT	GO:0005575,GO:0005623,GO:0005886,GO:0016020,GO:0044464,GO:0071944		ko:K16789					ko00000,ko02000	2.A.88.3			Bacteria	1V1WX@1239,24E4Z@186801,36IVJ@31979,COG3859@1,COG3859@2	NA|NA|NA	S	Proton-coupled thiamine transporter YuaJ	Gene3D, TIGRFAM, Pfam	G3DSA:1.10.1760.20, TIGR02357, PF09515	ECF_ThiT_YuaJ: energy-coupled thiamine transporter ThiT, Thiamine transporter protein (Thia_YuaJ)	IPR012651, IPR012651	Thiamine transporter ThiT, Thiamine transporter ThiT	GO:0005886, GO:0015234, GO:0015888, GO:0005886, GO:0015234, GO:0015888
NC_008261.1_142_170	195103.CPF_1776	0	1120.1	Clostridiaceae				ko:K02021,ko:K06147					ko00000,ko02000	3.A.1.106,3.A.1.109,3.A.1.110,3.A.1.112,3.A.1.113,3.A.1.117,3.A.1.21			Bacteria	1TP0B@1239,247Q0@186801,36E82@31979,COG1132@1,COG1132@2	NA|NA|NA	V	ABC transporter transmembrane region	ProSiteProfiles, ProSiteProfiles, SUPERFAMILY, PANTHER, ProSitePatterns, Gene3D, Pfam, SUPERFAMILY, Gene3D, Pfam, SMART, PANTHER	PS50929, PS50893, SSF52540, PTHR24221, PS00211, G3DSA:3.40.50.300, PF00005, SSF90123, G3DSA:1.20.1560.10, PF00664, SM00382, PTHR24221:SF389	ABC transporter integral membrane type-1 fused domain profile., ATP-binding cassette, ABC transporter-type domain profile., ABC transporters family signature., ABC transporter, ABC transporter transmembrane region	IPR011527, IPR003439, IPR027417, IPR039421, IPR017871, IPR003439, IPR036640, IPR036640, IPR011527, IPR003593	ABC transporter type 1, transmembrane domain, ABC transporter-like, P-loop containing nucleoside triphosphate hydrolase, Type I protein exporter, ABC transporter, conserved site, ABC transporter-like, ABC transporter type 1, transmembrane domain superfamily, ABC transporter type 1, transmembrane domain superfamily, ABC transporter type 1, transmembrane domain, AAA+ ATPase domain	GO:0005524, GO:0016021, GO:0042626, GO:0055085, GO:0005524, GO:0016887, GO:0005524, GO:0016887, GO:0005524, GO:0016887, GO:0005524, GO:0016021, GO:0005524, GO:0016021, GO:0005524, GO:0016021, GO:0042626, GO:0055085
NC_008261.1_142_171	195103.CPF_1777	0	1081.6	Clostridiaceae				ko:K06147					ko00000,ko02000	3.A.1.106,3.A.1.109,3.A.1.21			Bacteria	1TP0B@1239,247Q0@186801,36DEY@31979,COG1132@1,COG1132@2	NA|NA|NA	V	ABC transporter transmembrane region	ProSiteProfiles, SMART, Pfam, ProSitePatterns, ProSiteProfiles, Gene3D, PANTHER, PANTHER, SUPERFAMILY, Pfam, SUPERFAMILY, Gene3D	PS50893, SM00382, PF00005, PS00211, PS50929, G3DSA:1.20.1560.10, PTHR24221:SF297, PTHR24221, SSF90123, PF00664, SSF52540, G3DSA:3.40.50.300	ATP-binding cassette, ABC transporter-type domain profile., ABC transporter, ABC transporters family signature., ABC transporter integral membrane type-1 fused domain profile., ABC transporter transmembrane region	IPR003439, IPR003593, IPR003439, IPR017871, IPR011527, IPR036640, IPR039421, IPR036640, IPR011527, IPR027417	ABC transporter-like, AAA+ ATPase domain, ABC transporter-like, ABC transporter, conserved site, ABC transporter type 1, transmembrane domain, ABC transporter type 1, transmembrane domain superfamily, Type I protein exporter, ABC transporter type 1, transmembrane domain superfamily, ABC transporter type 1, transmembrane domain, P-loop containing nucleoside triphosphate hydrolase	GO:0005524, GO:0016887, GO:0005524, GO:0016887, GO:0005524, GO:0016887, GO:0005524, GO:0016021, GO:0042626, GO:0055085, GO:0005524, GO:0016021, GO:0005524, GO:0016021, GO:0005524, GO:0016021, GO:0042626, GO:0055085
NC_008261.1_142_173	NA	NA	NA	NA	NA	NA	NA	NA	NA	NA	NA	NA	NA	NA	NA	NA	NA	NA	NA	NA	NA	Coils, SUPERFAMILY	Coil, SSF49464		IPR008969	Carboxypeptidase-like, regulatory domain superfamily
NC_008261.1_142_175	195103.CPF_1780	1.1e-256	892.1	Clostridiaceae													Bacteria	1V10T@1239,24E5Q@186801,36FWF@31979,COG5298@1,COG5298@2	NA|NA|NA	S	Uncharacterized protein conserved in bacteria (DUF2334)	Gene3D, CDD, SUPERFAMILY, Pfam, ProSiteProfiles	G3DSA:3.20.20.370, cd10923, SSF88713, PF10096, PS51257	CE4_COG5298, Uncharacterized protein conserved in bacteria (DUF2334), Prokaryotic membrane lipoprotein lipid attachment site profile.	IPR011330, IPR018763	Glycoside hydrolase/deacetylase, beta/alpha-barrel, Protein of unknown function DUF2334	GO:0003824, GO:0005975
NC_008261.1_142_177	195103.CPF_1782	2.5e-175	621.3	Clostridiaceae	scrK		2.7.1.4	ko:K00847	ko00051,ko00500,ko00520,ko01100,map00051,map00500,map00520,map01100		R00760,R00867,R03920	RC00002,RC00017	ko00000,ko00001,ko01000				Bacteria	1TPGM@1239,247M1@186801,36DU6@31979,COG0524@1,COG0524@2	NA|NA|NA	G	PfkB family	PANTHER, Gene3D, Pfam, PANTHER, SUPERFAMILY, ProSitePatterns, CDD	PTHR43085:SF16, G3DSA:3.40.1190.20, PF00294, PTHR43085, SSF53613, PS00584, cd01167	pfkB family carbohydrate kinase, pfkB family of carbohydrate kinases signature 2., bac_FRK	IPR029056, IPR011611, IPR029056, IPR002173	Ribokinase-like, Carbohydrate kinase PfkB, Ribokinase-like, Carbohydrate/puine kinase, PfkB, conserved site	GO:0016773
NC_008261.1_142_178	195103.CPF_1783	1.5e-288	998	Clostridiaceae	scrB		3.2.1.26	ko:K01193	ko00052,ko00500,ko01100,map00052,map00500,map01100		R00801,R00802,R02410,R03635,R03921,R06088	RC00028,RC00077	ko00000,ko00001,ko01000		GH32		Bacteria	1TPAE@1239,247UU@186801,36DCF@31979,COG1621@1,COG1621@2	NA|NA|NA	G	Glycosyl hydrolases family 32 N-terminal domain	Pfam, CDD, ProSitePatterns, SUPERFAMILY, TIGRFAM, Gene3D, SMART, SUPERFAMILY, PANTHER, Pfam, Gene3D	PF08244, cd08996, PS00609, SSF75005, TIGR01322, G3DSA:2.115.10.20, SM00640, SSF49899, PTHR43101, PF00251, G3DSA:2.60.120.560	Glycosyl hydrolases family 32 C terminal, GH32_B_Fructosidase, Glycosyl hydrolases family 32 active site., scrB_fam: sucrose-6-phosphate hydrolase, Glycosyl hydrolases family 32 N-terminal domain	IPR013189, IPR018053, IPR023296, IPR006232, IPR023296, IPR001362, IPR013320, IPR013148	Glycosyl hydrolase family 32, C-terminal, Glycoside hydrolase, family 32, active site, Glycosyl hydrolase, five-bladed beta-propellor domain superfamily, Sucrose-6-phosphate hydrolase, Glycosyl hydrolase, five-bladed beta-propellor domain superfamily, Glycoside hydrolase, family 32, Concanavalin A-like lectin/glucanase domain superfamily, Glycosyl hydrolase family 32, N-terminal	GO:0004553, GO:0005975, GO:0004564, GO:0005737, GO:0005975, GO:0004553, GO:0005975	KEGG: 00052+3.2.1.26|KEGG: 00500+3.2.1.26, KEGG: 00052+3.2.1.26|KEGG: 00500+3.2.1.26
NC_008261.1_142_179	195103.CPF_1784	2.1e-174	618.2	Clostridiaceae	scrR1			ko:K03484					ko00000,ko03000				Bacteria	1TQ7K@1239,247M2@186801,36F5I@31979,COG1609@1,COG1609@2	NA|NA|NA	K	Transcriptional regulator, LacI family	ProSiteProfiles, Gene3D, ProSitePatterns, SUPERFAMILY, SMART, Pfam, Pfam, PANTHER, CDD, Gene3D, SUPERFAMILY, CDD, PANTHER, Gene3D	PS50932, G3DSA:3.40.50.2300, PS00356, SSF47413, SM00354, PF13377, PF00356, PTHR30146:SF93, cd01542, G3DSA:3.40.50.2300, SSF53822, cd01392, PTHR30146, G3DSA:1.10.260.40	LacI-type HTH domain profile., LacI-type HTH domain signature., Periplasmic binding protein-like domain, Bacterial regulatory proteins, lacI family, PBP1_TreR_like, HTH_LacI	IPR000843, IPR010982, IPR000843, IPR000843, IPR028082, IPR000843	LacI-type HTH domain, Lambda repressor-like, DNA-binding domain superfamily, LacI-type HTH domain, LacI-type HTH domain, Periplasmic binding protein-like I, LacI-type HTH domain	GO:0003677, GO:0006355, GO:0003677, GO:0003677, GO:0006355, GO:0003677, GO:0006355, GO:0003677, GO:0006355
NC_008261.1_142_18	195103.CPF_1623	4.4e-197	693.7	Clostridiaceae	hisC		4.1.1.81	ko:K04720	ko00860,map00860		R06530	RC00517	ko00000,ko00001,ko01000				Bacteria	1TP5D@1239,248Q0@186801,36DWQ@31979,COG0079@1,COG0079@2	NA|NA|NA	E	PFAM aminotransferase class I and II	PANTHER, Gene3D, Gene3D, CDD, PANTHER, SUPERFAMILY, Pfam	PTHR42885, G3DSA:3.90.1150.10, G3DSA:3.40.640.10, cd00609, PTHR42885:SF1, SSF53383, PF00155	AAT_like, Aminotransferase class I and II	IPR015422, IPR015421, IPR015424, IPR004839	Pyridoxal phosphate-dependent transferase domain 1, Pyridoxal phosphate-dependent transferase, major domain, Pyridoxal phosphate-dependent transferase, Aminotransferase, class I/classII	GO:0003824, GO:0003824, GO:0009058, GO:0030170
NC_008261.1_142_180	195103.CPF_1785	1.5e-242	845.1	Clostridiaceae	scrA		2.7.1.193,2.7.1.199,2.7.1.201,2.7.1.208,2.7.1.211	ko:K02803,ko:K02804,ko:K02808,ko:K02809,ko:K02810,ko:K02818,ko:K02819,ko:K20107,ko:K20108,ko:K20117,ko:K20118	ko00010,ko00500,ko00520,ko02060,map00010,map00500,map00520,map02060	M00267,M00269,M00270,M00806,M00809	R00811,R02738,R02780,R04111,R05199	RC00017,RC03206	ko00000,ko00001,ko00002,ko01000,ko02000	4.A.1.1.11,4.A.1.1.12,4.A.1.1.13,4.A.1.1.14,4.A.1.1.15,4.A.1.1.2,4.A.1.1.5,4.A.1.1.7,4.A.1.1.9,4.A.1.2.1,4.A.1.2.10,4.A.1.2.12,4.A.1.2.13,4.A.1.2.4,4.A.1.2.8,4.A.1.2.9			Bacteria	1TP5X@1239,247WT@186801,36DI9@31979,COG1263@1,COG1263@2,COG1264@1,COG1264@2	NA|NA|NA	G	Pts system	CDD, TIGRFAM, PANTHER, Pfam, Pfam, ProSitePatterns, ProSiteProfiles, ProSiteProfiles, Gene3D, SUPERFAMILY, PANTHER	cd00212, TIGR01996, PTHR30175:SF7, PF00367, PF02378, PS01035, PS51103, PS51098, G3DSA:3.30.1360.60, SSF55604, PTHR30175	PTS_IIB_glc, PTS-II-BC-sucr: PTS system, sucrose-specific IIBC component, phosphotransferase system, EIIB, Phosphotransferase system, EIIC, PTS EIIB domains cysteine phosphorylation site signature., PTS_EIIC type-1 domain profile., PTS_EIIB type-1 domain profile.	IPR018113, IPR010973, IPR018113, IPR003352, IPR018113, IPR013013, IPR001996, IPR036878, IPR036878	Phosphotransferase system EIIB, cysteine phosphorylation site, Phosphotransferase system, sucrose-specific IIBC component, Phosphotransferase system EIIB, cysteine phosphorylation site, Phosphotransferase system, EIIC, Phosphotransferase system EIIB, cysteine phosphorylation site, Phosphotransferase system, EIIC component, type 1, Phosphotransferase system, IIB component, type 1, Glucose permease…	GO:0008982, GO:0008982, GO:0009401, GO:0016021, GO:0008982, GO:0008982, GO:0009401, GO:0016020, GO:0008982, GO:0008982, GO:0009401, GO:0008982, GO:0009401, GO:0008982, GO:0009401
NC_008261.1_142_181	195103.CPF_1786	2.4e-110	404.8	Clostridiaceae			4.2.99.20	ko:K08680	ko00130,ko01100,ko01110,map00130,map01100,map01110	M00116	R08166	RC02148,RC02475	ko00000,ko00001,ko00002,ko01000				Bacteria	1UIS2@1239,25ER1@186801,36URS@31979,COG0657@1,COG0657@2	NA|NA|NA	I	acetylesterase activity	PIRSF, Gene3D, SUPERFAMILY	PIRSF033634, G3DSA:3.40.50.1820, SSF53474		IPR017018, IPR029058, IPR029058	Uncharacterised conserved protein UCP033634, Alpha/Beta hydrolase fold, Alpha/Beta hydrolase fold
NC_008261.1_142_182	195103.CPF_1787	5.6e-197	693.3	Clostridiaceae	asrC			ko:K00385	ko00920,ko01120,map00920,map01120		R00858,R10146	RC00065	ko00000,ko00001				Bacteria	1TR7P@1239,2493K@186801,36F1M@31979,COG2221@1,COG2221@2	NA|NA|NA	C	Belongs to the nitrite and sulfite reductase 4Fe-4S domain family	PANTHER, Pfam, SUPERFAMILY, SUPERFAMILY, SUPERFAMILY, ProSiteProfiles, TIGRFAM, Gene3D, Pfam, ProSitePatterns, Gene3D, ProSiteProfiles, PANTHER, Pfam, PRINTS, PRINTS	PTHR11493:SF54, PF01077, SSF54862, SSF55124, SSF56014, PS51379, TIGR02912, G3DSA:3.90.480.20, PF00037, PS00198, G3DSA:3.30.70.20, PS51379, PTHR11493, PF03460, PR00397, PR00397	Nitrite and sulphite reductase 4Fe-4S domain, 4Fe-4S ferredoxin-type iron-sulfur binding domain profile., sulfite_red_C: sulfite reductase, subunit C, 4Fe-4S binding domain, 4Fe-4S ferredoxin-type iron-sulfur binding region signature., 4Fe-4S ferredoxin-type iron-sulfur binding domain profile., Nitrite/Sulfite reductase ferredoxin-like half domain, Sirohaem Fe-binding site signature, Sirohaem Fe-…	IPR006067, IPR036136, IPR017896, IPR014261, IPR017896, IPR017900, IPR017896, IPR005117, IPR006066, IPR006066	Nitrite/sulphite reductase 4Fe-4S domain, Nitrite/Sulfite reductase ferredoxin-like domain superfamily, 4Fe-4S ferredoxin-type, iron-sulphur binding domain, Sulphite reductase, subunit C, 4Fe-4S ferredoxin-type, iron-sulphur binding domain, 4Fe-4S ferredoxin, iron-sulphur binding, conserved site, 4Fe-4S ferredoxin-type, iron-sulphur binding domain, Nitrite/Sulfite reductase ferredoxin-like domain…	GO:0016491, GO:0020037, GO:0051536, GO:0055114, GO:0016491, GO:0055114, GO:0016491, GO:0055114, GO:0016491, GO:0020037, GO:0051536, GO:0055114, GO:0016491, GO:0020037, GO:0051536, GO:0055114	KEGG: 00920+1.8.1.2|MetaCyc: PWY-6683, KEGG: 00920+1.8.1.2|MetaCyc: PWY-6683, KEGG: 00920+1.8.1.2|MetaCyc: PWY-6683, KEGG: 00920+1.8.1.2|MetaCyc: PWY-6683, KEGG: 00920+1.8.1.2|MetaCyc: PWY-6683
NC_008261.1_142_183	195103.CPF_1788	2.4e-152	544.7	Clostridiaceae	asrB		1.18.1.2,1.19.1.1	ko:K00528,ko:K02823,ko:K16951	ko00240,ko00920,ko01100,ko01120,map00240,map00920,map01100,map01120		R00858,R10146,R10159	RC00065	ko00000,ko00001,ko01000			iHN637.CLJU_RS12555	Bacteria	1TQBZ@1239,248GQ@186801,36DE4@31979,COG0543@1,COG0543@2	NA|NA|NA	C	Sulfite reductase Subunit B	SUPERFAMILY, CDD, ProSiteProfiles, Pfam, PANTHER, Pfam, PIRSF, PRINTS, PRINTS, PRINTS, Gene3D, TIGRFAM, SUPERFAMILY, Gene3D	SSF52343, cd06221, PS51384, PF00175, PTHR43513, PF10418, PIRSF006816, PR00410, PR00410, PR00410, G3DSA:2.40.30.10, TIGR02911, SSF63380, G3DSA:3.40.50.80	sulfite_reductase_like, Ferredoxin reductase-type FAD binding domain profile., Oxidoreductase NAD-binding domain, Iron-sulfur cluster binding domain of dihydroorotate dehydrogenase B, Phenol hydroxylase reductase family signature, Phenol hydroxylase reductase family signature, Phenol hydroxylase reductase family signature, sulfite_red_B: sulfite reductase, subunit B	IPR039261, IPR017927, IPR001433, IPR019480, IPR012165, IPR001221, IPR001221, IPR001221, IPR014260, IPR017938, IPR039261	Ferredoxin-NADP reductase (FNR), nucleotide-binding domain, FAD-binding domain, ferredoxin reductase-type, Oxidoreductase FAD/NAD(P)-binding, Dihydroorotate dehydrogenase, electron transfer subunit, iron-sulphur cluster binding domain, Cytochrome-c3 hydrogenase, gamma subunit, Phenol hydroxylase reductase, Phenol hydroxylase reductase, Phenol hydroxylase reductase, Sulphite reductase, subunit B, …	GO:0016491, GO:0055114, GO:0016491, GO:0055114, GO:0006221, GO:0050660, GO:0051537, GO:0055114, GO:0055114, GO:0055114
NC_008261.1_142_184	195103.CPF_1789	2.7e-199	701	Clostridiaceae	asrA			ko:K16950	ko00920,ko01120,map00920,map01120		R00858,R10146	RC00065	ko00000,ko00001				Bacteria	1UHW8@1239,25E55@186801,36UIK@31979,COG1453@1,COG1453@2	NA|NA|NA	S	Sulfite reductase, subunit A	Gene3D, TIGRFAM, PANTHER, ProSiteProfiles, ProSiteProfiles, ProSitePatterns, SUPERFAMILY, Pfam	G3DSA:1.10.1060.10, TIGR02910, PTHR40447, PS51379, PS51379, PS00198, SSF46548, PF17179	sulfite_red_A: sulfite reductase, subunit A, 4Fe-4S ferredoxin-type iron-sulfur binding domain profile., 4Fe-4S ferredoxin-type iron-sulfur binding domain profile., 4Fe-4S ferredoxin-type iron-sulfur binding region signature., 4Fe-4S dicluster domain	IPR009051, IPR014259, IPR017896, IPR017896, IPR017900, IPR009051, IPR017896	Alpha-helical ferredoxin, Sulphite reductase, subunit A, 4Fe-4S ferredoxin-type, iron-sulphur binding domain, 4Fe-4S ferredoxin-type, iron-sulphur binding domain, 4Fe-4S ferredoxin, iron-sulphur binding, conserved site, Alpha-helical ferredoxin, 4Fe-4S ferredoxin-type, iron-sulphur binding domain	GO:0051536, GO:0051536
NC_008261.1_142_185	195103.CPF_1790	1.2e-54	219.2	Clostridiaceae													Bacteria	1VQ4G@1239,24RND@186801,2EQFF@1,33I1F@2,36N1I@31979	NA|NA|NA			NA	NA	NA	NA	NA	NA	NA
NC_008261.1_142_186	195103.CPF_1791	1.9e-201	708.4	Clostridiaceae				ko:K02004		M00258			ko00000,ko00002,ko02000	3.A.1			Bacteria	1TPUU@1239,2483J@186801,36ETV@31979,COG0577@1,COG0577@2	NA|NA|NA	V	ABC-type antimicrobial peptide transport system, permease component	Pfam, PANTHER, PANTHER, Pfam	PF12704, PTHR30572:SF4, PTHR30572, PF02687	MacB-like periplasmic core domain, FtsX-like permease family	IPR025857, IPR003838	MacB-like periplasmic core domain, ABC transporter permease protein domain	GO:0016020
NC_008261.1_142_187	195103.CPF_1792	5e-125	453.8	Clostridiaceae				ko:K02003		M00258			ko00000,ko00002,ko02000	3.A.1			Bacteria	1TPBJ@1239,248EZ@186801,36DXW@31979,COG1136@1,COG1136@2	NA|NA|NA	V	ABC transporter	SUPERFAMILY, PANTHER, ProSiteProfiles, SMART, ProSitePatterns, CDD, Gene3D, PANTHER, Pfam	SSF52540, PTHR24220:SF609, PS50893, SM00382, PS00211, cd03255, G3DSA:3.40.50.300, PTHR24220, PF00005	ATP-binding cassette, ABC transporter-type domain profile., ABC transporters family signature., ABC_MJ0796_LolCDE_FtsE, ABC transporter	IPR027417, IPR003439, IPR003593, IPR017871, IPR003439	P-loop containing nucleoside triphosphate hydrolase, ABC transporter-like, AAA+ ATPase domain, ABC transporter, conserved site, ABC transporter-like	GO:0005524, GO:0016887, GO:0005524, GO:0016887, GO:0005524, GO:0016887
NC_008261.1_142_188	195103.CPF_1793	1e-188	666	Clostridiaceae				ko:K02005					ko00000				Bacteria	1V5C3@1239,24EBS@186801,36H54@31979,COG0845@1,COG0845@2	NA|NA|NA	M	Efflux transporter, RND family, MFP subunit	MobiDBLite, SUPERFAMILY, Coils, Pfam, PANTHER, PANTHER, Coils, PANTHER, PANTHER, Gene3D, MobiDBLite, Gene3D, Gene3D, Gene3D, Pfam	mobidb-lite, SSF111369, Coil, PF13437, PTHR32347:SF14, PTHR32347:SF14, Coil, PTHR32347, PTHR32347, G3DSA:2.40.30.170, mobidb-lite, G3DSA:1.10.287.470, G3DSA:2.40.420.20, G3DSA:2.40.50.100, PF13533	consensus disorder prediction, HlyD family secretion protein, consensus disorder prediction, Biotin-lipoyl like	IPR039562	Membrane fusion protein, biotin-lipoyl like domain
NC_008261.1_142_189	195103.CPF_1794	6.6e-122	443.4	Clostridiaceae	bioD	GO:0003674,GO:0003824,GO:0004141,GO:0005575,GO:0005622,GO:0005623,GO:0005737,GO:0005829,GO:0006082,GO:0006732,GO:0006766,GO:0006767,GO:0006768,GO:0006790,GO:0006807,GO:0008150,GO:0008152,GO:0009058,GO:0009102,GO:0009108,GO:0009110,GO:0009987,GO:0016053,GO:0016874,GO:0016879,GO:0016882,GO:0017144,GO:0018130,GO:0019752,GO:0032787,GO:0034641,GO:0042364,GO:0043436,GO:0043603,GO:0043604,GO:0044237,GO:…	6.3.3.3	ko:K01935	ko00780,ko01100,map00780,map01100	M00123,M00573,M00577	R03182	RC00868	ko00000,ko00001,ko00002,ko01000				Bacteria	1UYA3@1239,24F15@186801,36I6Q@31979,COG0132@1,COG0132@2	NA|NA|NA	H	Catalyzes a mechanistically unusual reaction, the ATP- dependent insertion of CO2 between the N7 and N8 nitrogen atoms of 7,8-diaminopelargonic acid (DAPA) to form an ureido ring	PANTHER, TIGRFAM, PIRSF, Hamap, SUPERFAMILY, PANTHER, Gene3D, Pfam	PTHR43210:SF2, TIGR00347, PIRSF006755, MF_00336, SSF52540, PTHR43210, G3DSA:3.40.50.300, PF13500	bioD: dethiobiotin synthase, ATP-dependent dethiobiotin synthetase BioD [bioD]., AAA domain	IPR004472, IPR004472, IPR004472, IPR027417, IPR004472	Dethiobiotin synthase BioD, Dethiobiotin synthase BioD, Dethiobiotin synthase BioD, P-loop containing nucleoside triphosphate hydrolase, Dethiobiotin synthase BioD	GO:0000287, GO:0004141, GO:0005524, GO:0009102, GO:0000287, GO:0004141, GO:0005524, GO:0009102, GO:0000287, GO:0004141, GO:0005524, GO:0009102, GO:0000287, GO:0004141, GO:0005524, GO:0009102	KEGG: 00780+6.3.3.3|MetaCyc: PWY-7380, KEGG: 00780+6.3.3.3|MetaCyc: PWY-7380, KEGG: 00780+6.3.3.3|MetaCyc: PWY-7380, KEGG: 00780+6.3.3.3|MetaCyc: PWY-7380
NC_008261.1_142_19	195103.CPF_1624	8.4e-177	626.3	Clostridiaceae	cax	GO:0003674,GO:0005215,GO:0005575,GO:0005623,GO:0005886,GO:0005887,GO:0006810,GO:0006811,GO:0006812,GO:0006816,GO:0008150,GO:0008324,GO:0015075,GO:0015077,GO:0015078,GO:0015085,GO:0015291,GO:0015297,GO:0015298,GO:0015299,GO:0015318,GO:0015368,GO:0015369,GO:0015491,GO:0015672,GO:0016020,GO:0016021,GO:0022804,GO:0022857,GO:0022890,GO:0030001,GO:0031224,GO:0031226,GO:0034220,GO:0044425,GO:0044459,GO:…		ko:K07300					ko00000,ko02000	2.A.19		iJN678.slr1336	Bacteria	1TQN2@1239,248J3@186801,36F50@31979,COG0387@1,COG0387@2	NA|NA|NA	P	calcium proton exchanger	TIGRFAM, Pfam, Pfam, Gene3D, TIGRFAM, Gene3D, PANTHER	TIGR00378, PF01699, PF01699, G3DSA:1.20.1420.30, TIGR00846, G3DSA:1.20.58.1130, PTHR31503	cax: calcium/proton exchanger, Sodium/calcium exchanger protein, Sodium/calcium exchanger protein, caca2: calcium/proton exchanger	IPR004798, IPR004837, IPR004837, IPR004713	Calcium/proton exchanger CAX, Sodium/calcium exchanger membrane region, Sodium/calcium exchanger membrane region, Calcium/proton exchanger	GO:0006816, GO:0015369, GO:0016021, GO:0055085, GO:0016021, GO:0055085, GO:0006812, GO:0008324, GO:0016021, GO:0055085	Reactome: R-HSA-425561, Reactome: R-HSA-425561
NC_008261.1_142_190	195103.CPF_1795	1.2e-174	619	Clostridiaceae	bioB		2.6.1.62,2.8.1.6	ko:K00833,ko:K01012	ko00780,ko01100,map00780,map01100	M00123,M00573,M00577	R01078,R03231	RC00006,RC00441,RC00887	ko00000,ko00001,ko00002,ko01000,ko01007			iAF987.Gmet_1582	Bacteria	1TPQ4@1239,248J4@186801,36F2Q@31979,COG0502@1,COG0502@2	NA|NA|NA	H	Catalyzes the conversion of dethiobiotin (DTB) to biotin by the insertion of a sulfur atom into dethiobiotin via a radical- based mechanism	SMART, Gene3D, SFLD, SFLD, TIGRFAM, SMART, Hamap, CDD, Coils, Pfam, PANTHER, SUPERFAMILY, PIRSF, Pfam	SM00729, G3DSA:3.20.20.70, SFLDG01060, SFLDG01278, TIGR00433, SM00876, MF_01694, cd01335, Coil, PF06968, PTHR22976, SSF102114, PIRSF001619, PF04055	BATS domain containing, biotin synthase like, bioB: biotin synthase, Biotin synthase [bioB]., Radical_SAM, Biotin and Thiamin Synthesis associated domain, Radical SAM superfamily	IPR006638, IPR013785, IPR034416, IPR002684, IPR002684, IPR010722, IPR002684, IPR010722, IPR002684, IPR024177, IPR007197	Elp3/MiaB/NifB, Aldolase-type TIM barrel, BATS domain containing, Biotin synthase/Biotin biosynthesis bifunctional protein BioAB, Biotin synthase/Biotin biosynthesis bifunctional protein BioAB, Biotin and thiamin synthesis-associated domain, Biotin synthase/Biotin biosynthesis bifunctional protein BioAB, Biotin and thiamin synthesis-associated domain, Biotin synthase/Biotin biosynthesis bifunctio…	GO:0003824, GO:0051536, GO:0003824, GO:0004076, GO:0009102, GO:0004076, GO:0009102, GO:0004076, GO:0009102, GO:0004076, GO:0009102, GO:0003824, GO:0051536	KEGG: 00780+2.8.1.6|MetaCyc: PWY-7380, KEGG: 00780+2.8.1.6|MetaCyc: PWY-7380, KEGG: 00780+2.8.1.6|MetaCyc: PWY-7380, KEGG: 00780+2.8.1.6|MetaCyc: PWY-7380, KEGG: 00780+2.8.1.6|MetaCyc: PWY-7380, KEGG: 00780+2.8.1.6|MetaCyc: PWY-7380, KEGG: 00780+2.8.1.6|MetaCyc: PWY-7380, KEGG: 00780+2.8.1.6|MetaCyc: PWY-7380
NC_008261.1_142_191	1391647.AVSV01000002_gene1277	2.5e-63	248.4	Clostridiaceae	bioY			ko:K03523	ko02010,map02010	M00581,M00582			ko00000,ko00001,ko00002,ko02000	2.A.88.1,2.A.88.2			Bacteria	1VAY6@1239,24HU5@186801,36DWS@31979,COG1268@1,COG1268@2	NA|NA|NA	S	hmm pf02632	Pfam, PANTHER, PIRSF, Gene3D	PF02632, PTHR34295, PIRSF016661, G3DSA:1.10.1760.20	BioY family	IPR003784, IPR003784, IPR003784	BioY protein, BioY protein, BioY protein	GO:0005886, GO:0015225, GO:0015878, GO:0005886, GO:0015225, GO:0015878, GO:0005886, GO:0015225, GO:0015878
NC_008261.1_142_192	195103.CPF_1797	4.7e-186	657.1	Clostridiaceae	ypuA												Bacteria	1TR2I@1239,24C10@186801,36DKY@31979,COG4086@1,COG4086@2	NA|NA|NA	S	hmm pf06207	MobiDBLite, MobiDBLite, Coils, Pfam	mobidb-lite, mobidb-lite, Coil, PF06207	consensus disorder prediction, consensus disorder prediction, Protein of unknown function (DUF1002)	IPR009343	Protein of unknown function DUF1002
NC_008261.1_142_193	318464.IO99_13070	0	1480.7	Clostridiaceae	spoVK			ko:K03695,ko:K03696,ko:K03798,ko:K06413	ko01100,ko04213,map01100,map04213	M00742			ko00000,ko00001,ko00002,ko01000,ko01002,ko03110				Bacteria	1TPQZ@1239,24BQK@186801,36FJP@31979,COG0464@1,COG0464@2,COG0542@1,COG0542@2	NA|NA|NA	O	stage V sporulation protein K	Gene3D, Gene3D, Gene3D, Gene3D, Gene3D, PRINTS, PRINTS, PRINTS, PRINTS, PRINTS, PRINTS, PRINTS, PRINTS, Coils, PANTHER, PANTHER, PANTHER, SUPERFAMILY, SUPERFAMILY, SMART, SMART, SMART, CDD, Pfam, Pfam, CDD, SUPERFAMILY, Gene3D, CDD	G3DSA:3.40.50.300, G3DSA:3.40.50.300, G3DSA:1.10.8.60, G3DSA:1.10.8.60, G3DSA:1.10.8.60, PR00819, PR00819, PR00819, PR00819, PR00819, PR00819, PR00819, PR00819, Coil, PTHR43392, PTHR43392, PTHR43392, SSF52540, SSF52540, SM00382, SM00382, SM00382, cd00009, PF00004, PF00004, cd00009, SSF52540, G3DSA:3.40.50.300, cd00009	CbxX/CfqX superfamily signature, CbxX/CfqX superfamily signature, CbxX/CfqX superfamily signature, CbxX/CfqX superfamily signature, CbxX/CfqX superfamily signature, CbxX/CfqX superfamily signature, CbxX/CfqX superfamily signature, CbxX/CfqX superfamily signature, AAA, ATPase family associated with various cellular activities (AAA), ATPase family associated with various cellular activities (AAA), …	IPR000641, IPR000641, IPR000641, IPR000641, IPR000641, IPR000641, IPR000641, IPR000641, IPR027417, IPR027417, IPR003593, IPR003593, IPR003593, IPR003959, IPR003959, IPR027417	CbxX/CfqX, CbxX/CfqX, CbxX/CfqX, CbxX/CfqX, CbxX/CfqX, CbxX/CfqX, CbxX/CfqX, CbxX/CfqX, P-loop containing nucleoside triphosphate hydrolase, P-loop containing nucleoside triphosphate hydrolase, AAA+ ATPase domain, AAA+ ATPase domain, AAA+ ATPase domain, ATPase, AAA-type, core, ATPase, AAA-type, core, P-loop containing nucleoside triphosphate hydrolase	GO:0005524, GO:0005524, GO:0005524, GO:0005524, GO:0005524, GO:0005524, GO:0005524, GO:0005524, GO:0005524, GO:0005524
NC_008261.1_142_194	195103.CPF_1799	0	1323.1	Clostridiaceae	yyaE												Bacteria	1TPZG@1239,247JV@186801,36E8E@31979,COG0243@1,COG0243@2	NA|NA|NA	C	Belongs to the prokaryotic molybdopterin-containing oxidoreductase family	PANTHER, Pfam, SMART, Pfam, Gene3D, CDD, Gene3D, Gene3D, Gene3D, Pfam, Gene3D, SUPERFAMILY, SUPERFAMILY, ProSiteProfiles, CDD, Coils	PTHR43742, PF00384, SM00926, PF01568, G3DSA:3.40.50.740, cd02766, G3DSA:2.20.25.90, G3DSA:2.40.40.20, G3DSA:3.30.2070.10, PF04879, G3DSA:3.40.228.10, SSF53706, SSF50692, PS51669, cd02775, Coil	Molybdopterin oxidoreductase, Molydopterin dinucleotide binding domain, MopB_3, Molybdopterin oxidoreductase Fe4S4 domain, Prokaryotic molybdopterin oxidoreductases 4Fe-4S domain profile., MopB_CT	IPR006656, IPR006963, IPR006657, IPR006963, IPR009010, IPR006963	Molybdopterin oxidoreductase, Molybdopterin oxidoreductase, 4Fe-4S domain, Molybdopterin dinucleotide-binding domain, Molybdopterin oxidoreductase, 4Fe-4S domain, Aspartate decarboxylase-like domain superfamily, Molybdopterin oxidoreductase, 4Fe-4S domain	GO:0016491, GO:0055114, GO:0016491, GO:0055114, GO:0016491, GO:0043546, GO:0055114, GO:0016491, GO:0055114, GO:0016491, GO:0055114	Reactome: R-HSA-611105|Reactome: R-HSA-6799198, Reactome: R-HSA-611105|Reactome: R-HSA-6799198, Reactome: R-HSA-611105|Reactome: R-HSA-6799198, Reactome: R-HSA-611105|Reactome: R-HSA-6799198
NC_008261.1_142_195	195103.CPF_1800	2.6e-205	721.1	Clostridiaceae	prs		2.7.6.1	ko:K00948	ko00030,ko00230,ko01100,ko01110,ko01120,ko01130,ko01200,ko01230,map00030,map00230,map01100,map01110,map01120,map01130,map01200,map01230	M00005	R01049	RC00002,RC00078	ko00000,ko00001,ko00002,ko01000				Bacteria	1TQ6Q@1239,248ZN@186801,36DE7@31979,COG0462@1,COG0462@2	NA|NA|NA	F	Involved in the biosynthesis of the central metabolite phospho-alpha-D-ribosyl-1-pyrophosphate (PRPP) via the transfer of pyrophosphoryl group from ATP to 1-hydroxyl of ribose-5-phosphate (Rib-5-P)	TIGRFAM, SUPERFAMILY, CDD, SUPERFAMILY, Pfam, Pfam, Gene3D, Gene3D, PANTHER, SMART	TIGR01251, SSF53271, cd06223, SSF53271, PF00156, PF13793, G3DSA:3.40.50.2020, G3DSA:3.40.50.2020, PTHR10210, SM01400	ribP_PPkin: ribose-phosphate diphosphokinase, PRTases_typeI, Phosphoribosyl transferase domain, N-terminal domain of ribose phosphate pyrophosphokinase	IPR005946, IPR029057, IPR000836, IPR029057, IPR000836, IPR029099, IPR005946	Ribose-phosphate pyrophosphokinase, Phosphoribosyltransferase-like, Phosphoribosyltransferase domain, Phosphoribosyltransferase-like, Phosphoribosyltransferase domain, Ribose-phosphate pyrophosphokinase, N-terminal domain, Ribose-phosphate pyrophosphokinase	GO:0000287, GO:0004749, GO:0009165, GO:0009116, GO:0009116, GO:0000287, GO:0004749, GO:0009165	KEGG: 00030+2.7.6.1|KEGG: 00230+2.7.6.1, KEGG: 00030+2.7.6.1|KEGG: 00230+2.7.6.1, KEGG: 00030+2.7.6.1|KEGG: 00230+2.7.6.1
NC_008261.1_142_196	195103.CPF_1801	7.9e-199	699.5	Clostridiaceae													Bacteria	1TR66@1239,25ER2@186801,36URT@31979,COG0552@1,COG0552@2	NA|NA|NA	U	protein localization to endoplasmic reticulum	Coils, SUPERFAMILY	Coil, SSF52540		IPR027417	P-loop containing nucleoside triphosphate hydrolase
NC_008261.1_142_197	195103.CPF_1802	2.7e-177	627.9	Clostridiaceae													Bacteria	1TYRH@1239,24GVR@186801,36I2Q@31979,COG0726@1,COG0726@2	NA|NA|NA	G	deacetylase	CDD, SUPERFAMILY, Coils, ProSiteProfiles, PANTHER, MobiDBLite, MobiDBLite, Gene3D, Pfam, PANTHER, MobiDBLite	cd10944, SSF88713, Coil, PS51677, PTHR10587, mobidb-lite, mobidb-lite, G3DSA:3.20.20.370, PF01522, PTHR10587:SF97, mobidb-lite	CE4_SmPgdA_like, NodB homology domain profile., consensus disorder prediction, consensus disorder prediction, Polysaccharide deacetylase, consensus disorder prediction	IPR011330, IPR002509, IPR002509	Glycoside hydrolase/deacetylase, beta/alpha-barrel, NodB homology domain, NodB homology domain	GO:0003824, GO:0005975, GO:0005975, GO:0016810, GO:0005975, GO:0016810
NC_008261.1_142_198	195103.CPF_1803	0	1334.3	Clostridiaceae	pulA		3.2.1.41	ko:K01200	ko00500,ko01100,ko01110,map00500,map01100,map01110		R02111		ko00000,ko00001,ko01000		CBM48,GH13		Bacteria	1TP3M@1239,2481P@186801,36E5I@31979,COG1523@1,COG1523@2	NA|NA|NA	G	Belongs to the glycosyl hydrolase 13 family	Pfam, TIGRFAM, Pfam, PANTHER, CDD, Gene3D, SUPERFAMILY, Gene3D, SUPERFAMILY, Gene3D, CDD, SUPERFAMILY, SMART, Pfam	PF02922, TIGR02104, PF00128, PTHR43631, cd11341, G3DSA:2.60.40.1180, SSF51445, G3DSA:2.60.40.10, SSF51011, G3DSA:3.20.20.80, cd02860, SSF81296, SM00642, PF11852	Carbohydrate-binding module 48 (Isoamylase N-terminal domain), pulA_typeI: pullulanase, type I, Alpha amylase, catalytic domain, AmyAc_Pullulanase_LD-like, E_set_Pullulanase, Domain of unknown function (DUF3372)	IPR004193, IPR011840, IPR006047, IPR013780, IPR017853, IPR013783, IPR014756, IPR006047, IPR024561	Glycoside hydrolase, family 13, N-terminal, Pullulanase, type I, Glycosyl hydrolase, family 13, catalytic domain, Glycosyl hydrolase, all-beta, Glycoside hydrolase superfamily, Immunoglobulin-like fold, Immunoglobulin E-set, Glycosyl hydrolase, family 13, catalytic domain, Alpha-1,6-glucosidases, pullulanase-type, C-terminal	GO:0004553, GO:0005975, GO:0003824, GO:0005975, GO:0003824, GO:0005975	Reactome: R-HSA-3322077|Reactome: R-HSA-3878781
NC_008261.1_142_199	195103.CPF_1804	3.5e-94	350.9	Clostridiaceae	lepB		3.4.21.89	ko:K03100	ko02024,ko03060,map02024,map03060				ko00000,ko00001,ko01000,ko01002				Bacteria	1V7H9@1239,24MVR@186801,36MSG@31979,COG0681@1,COG0681@2	NA|NA|NA	U	Belongs to the peptidase S26 family	CDD, ProSitePatterns, PRINTS, PRINTS, PRINTS, SUPERFAMILY, ProSitePatterns, Pfam, TIGRFAM, Gene3D, PANTHER	cd06530, PS00760, PR00727, PR00727, PR00727, SSF51306, PS00761, PF00717, TIGR02227, G3DSA:2.10.109.10, PTHR43390	S26_SPase_I, Signal peptidases I lysine active site., Bacterial leader peptidase 1 (S26A) family signature, Bacterial leader peptidase 1 (S26A) family signature, Bacterial leader peptidase 1 (S26A) family signature, Signal peptidases I signature 3., Peptidase S24-like, sigpep_I_bact: signal peptidase I	IPR019757, IPR000223, IPR000223, IPR000223, IPR036286, IPR019758, IPR015927, IPR000223	Peptidase S26A, signal peptidase I, lysine active site, Peptidase S26A, signal peptidase I, Peptidase S26A, signal peptidase I, Peptidase S26A, signal peptidase I, LexA/Signal peptidase-like superfamily, Peptidase S26A, signal peptidase I, conserved site, Peptidase S24/S26A/S26B/S26C, Peptidase S26A, signal peptidase I	GO:0008236, GO:0016021, GO:0006508, GO:0008236, GO:0016020, GO:0006508, GO:0008236, GO:0016020, GO:0006508, GO:0008236, GO:0016020, GO:0008236, GO:0016021, GO:0006508, GO:0008236, GO:0016020
NC_008261.1_142_2	195103.CPF_1608	3.4e-106	391	Clostridiaceae				ko:K06400					ko00000				Bacteria	1UFD3@1239,24EHQ@186801,36HH2@31979,COG1961@1,COG1961@2	NA|NA|NA	L	Resolvase, N terminal domain	Pfam, CDD, PANTHER, ProSiteProfiles, SMART, SUPERFAMILY, Gene3D	PF00239, cd03768, PTHR30461, PS51736, SM00857, SSF53041, G3DSA:3.40.50.1390	Resolvase, N terminal domain, SR_ResInv, Resolvase/invertase-type recombinase catalytic domain profile.	IPR006119, IPR006119, IPR006119, IPR036162	Resolvase, N-terminal catalytic domain, Resolvase, N-terminal catalytic domain, Resolvase, N-terminal catalytic domain, Resolvase-like, N-terminal catalytic domain superfamily	GO:0000150, GO:0003677, GO:0006310, GO:0000150, GO:0003677, GO:0006310, GO:0000150, GO:0003677, GO:0006310, GO:0000150, GO:0003677, GO:0006310
NC_008261.1_142_20	195103.CPF_1625	5.2e-245	853.2	Clostridiaceae	npp												Bacteria	1TRZ7@1239,24AU3@186801,36EDG@31979,COG1524@1,COG1524@2	NA|NA|NA	S	type I phosphodiesterase nucleotide pyrophosphatase	PANTHER, SUPERFAMILY, Gene3D, Pfam, PANTHER, CDD	PTHR10151, SSF53649, G3DSA:3.40.720.10, PF01663, PTHR10151:SF70, cd16018	Type I phosphodiesterase / nucleotide pyrophosphatase, Enpp	IPR017850, IPR017849, IPR002591	Alkaline-phosphatase-like, core domain superfamily, Alkaline phosphatase-like, alpha/beta/alpha, Type I phosphodiesterase/nucleotide pyrophosphatase/phosphate transferase	GO:0003824, GO:0003824, GO:0003824
NC_008261.1_142_200	195103.CPF_1805	4e-145	520.8	Clostridiaceae													Bacteria	1UEZ7@1239,25JZ8@186801,29UNX@1,30G0H@2,36TZC@31979	NA|NA|NA			Coils, Coils, ProSiteProfiles	Coil, Coil, PS51257	Prokaryotic membrane lipoprotein lipid attachment site profile.
NC_008261.1_142_201	195103.CPF_1806	1e-38	165.6	Clostridiaceae													Bacteria	1VCKK@1239,24UUD@186801,36NZG@31979,COG1327@1,COG1327@2	NA|NA|NA	K	ATP cone domain	Pfam, ProSiteProfiles	PF03477, PS51161	ATP cone domain, ATP-cone domain profile.	IPR005144, IPR005144	ATP-cone domain, ATP-cone domain		Reactome: R-HSA-499943, Reactome: R-HSA-499943
NC_008261.1_142_202	195103.CPF_1807	0	1324.3	Clostridiaceae													Bacteria	1TRMA@1239,2480C@186801,36DDX@31979,COG1368@1,COG1368@2	NA|NA|NA	M	Phosphoglycerol transferase and related proteins,, alkaline phosphatase superfamily	Pfam, PANTHER, CDD, SUPERFAMILY, PANTHER, Gene3D	PF00884, PTHR10342, cd16015, SSF53649, PTHR10342:SF246, G3DSA:3.40.720.10	Sulfatase, LTA_synthase	IPR000917, IPR017850, IPR017849	Sulfatase, N-terminal, Alkaline-phosphatase-like, core domain superfamily, Alkaline phosphatase-like, alpha/beta/alpha	GO:0008484, GO:0003824, GO:0003824
NC_008261.1_142_203	195103.CPF_1808	3e-165	587.8	Clostridiaceae	yqjA												Bacteria	1TP2T@1239,24A4H@186801,36EC3@31979,COG4129@1,COG4129@2	NA|NA|NA	S	Putative aromatic acid exporter C-terminal domain	Pfam, PANTHER, Coils, Pfam, Gene3D	PF06081, PTHR40064, Coil, PF11728, G3DSA:1.20.120.940	Aromatic acid exporter family member 1, Putative aromatic acid exporter C-terminal domain	IPR010343, IPR021062, IPR038323	Aromatic acid exporter family member 1, Putative aromatic acid exporter, C-terminal, Putative aromatic acid exporter, C-terminal domain superfamily
NC_008261.1_142_204	195103.CPF_1809	3.5e-125	454.1	Clostridiaceae	uppS		2.5.1.31	ko:K00806	ko00900,ko01110,map00900,map01110		R06447	RC00279,RC02839	ko00000,ko00001,ko01000,ko01006				Bacteria	1TRKB@1239,248R2@186801,36EV1@31979,COG0020@1,COG0020@2	NA|NA|NA	I	undecaprenyl	Gene3D, SUPERFAMILY, PANTHER, PANTHER, Pfam, CDD	G3DSA:3.40.1180.10, SSF64005, PTHR10291, PTHR10291:SF0, PF01255, cd00475	Putative undecaprenyl diphosphate synthase, Cis_IPPS	IPR036424, IPR036424, IPR001441, IPR001441, IPR001441	Decaprenyl diphosphate synthase-like superfamily, Decaprenyl diphosphate synthase-like superfamily, Decaprenyl diphosphate synthase-like, Decaprenyl diphosphate synthase-like, Decaprenyl diphosphate synthase-like	GO:0016765, GO:0016765, GO:0016765, GO:0016765, GO:0016765	Reactome: R-HSA-446199, Reactome: R-HSA-446199, Reactome: R-HSA-446199, Reactome: R-HSA-446199, Reactome: R-HSA-446199
NC_008261.1_142_205	195103.CPF_1810	1.4e-281	974.9	Clostridiaceae	crtN		1.3.8.2,1.3.99.26,1.3.99.28,1.3.99.29,1.3.99.31	ko:K10027,ko:K10209	ko00906,ko01100,ko01110,map00906,map01100,map01110		R04787,R04798,R04800,R07653,R09690,R09691,R09692,R09719,R09744,R09745,R09746	RC01214,RC02088,RC02605,RC02625	ko00000,ko00001,ko01000				Bacteria	1TS4A@1239,249K1@186801,36G4Z@31979,COG1233@1,COG1233@2	NA|NA|NA	Q	Flavin containing amine oxidoreductase	Gene3D, Gene3D, Pfam, SUPERFAMILY, PANTHER, PANTHER, TIGRFAM	G3DSA:3.50.50.60, G3DSA:3.50.50.60, PF01593, SSF51905, PTHR43734, PTHR43734:SF1, TIGR02734	Flavin containing amine oxidoreductase, crtI_fam: phytoene desaturase	IPR036188, IPR036188, IPR002937, IPR036188, IPR014105	FAD/NAD(P)-binding domain superfamily, FAD/NAD(P)-binding domain superfamily, Amine oxidase, FAD/NAD(P)-binding domain superfamily, Carotenoid/retinoid oxidoreductase	GO:0016491, GO:0055114, GO:0016117, GO:0055114
NC_008261.1_142_206	195103.CPF_1811	0	1092.8	Clostridiaceae	M1-580												Bacteria	1TQ0S@1239,24800@186801,36E1T@31979,COG3437@1,COG3437@2	NA|NA|NA	T	Diguanylate cyclase	SUPERFAMILY, TIGRFAM, Pfam, CDD, CDD, ProSiteProfiles, Gene3D, Pfam, PANTHER, Coils, SMART, TIGRFAM, ProSiteProfiles, SMART, SUPERFAMILY, Gene3D	SSF55073, TIGR00277, PF01966, cd01949, cd00077, PS51832, G3DSA:1.10.3210.10, PF00990, PTHR45138, Coil, SM00471, TIGR00254, PS50887, SM00267, SSF109604, G3DSA:3.30.70.270	HDIG: HDIG domain, HD domain, GGDEF, HDc, HD-GYP domain profile., Diguanylate cyclase, GGDEF domain, GGDEF: diguanylate cyclase (GGDEF) domain, GGDEF domain profile.	IPR029787, IPR006675, IPR006674, IPR000160, IPR003607, IPR037522, IPR000160, IPR003607, IPR000160, IPR000160, IPR000160	Nucleotide cyclase, HDIG domain, HD domain, GGDEF domain, HD/PDEase domain, HD-GYP domain, GGDEF domain, HD/PDEase domain, GGDEF domain, GGDEF domain, GGDEF domain
NC_008261.1_142_207	NA	NA	NA	NA	NA	NA	NA	NA	NA	NA	NA	NA	NA	NA	NA	NA	NA	NA	NA	NA	NA	TIGRFAM, ProSiteProfiles	TIGR04223, PS51257	quorum_AgrD: cyclic lactone autoinducer peptide, Prokaryotic membrane lipoprotein lipid attachment site profile.	IPR009229	Staphylococcal AgrD
NC_008261.1_142_208	195103.CPF_1813	3.7e-106	391	Clostridiaceae				ko:K07813	ko02020,ko02024,map02020,map02024				ko00000,ko00001,ko01002				Bacteria	1VF1N@1239,24SCM@186801,36HYN@31979,COG4512@1,COG4512@2	NA|NA|NA	KOT	PFAM Accessory gene regulator B	SMART, Hamap, Pfam	SM00793, MF_00784, PF04647	Accessory gene regulator protein B [agrB]., Accessory gene regulator B	IPR006741, IPR006741, IPR006741	Accessory gene regulator B, Accessory gene regulator B, Accessory gene regulator B	GO:0008233, GO:0009372, GO:0009405, GO:0016021, GO:0008233, GO:0009372, GO:0009405, GO:0016021, GO:0008233, GO:0009372, GO:0009405, GO:0016021
NC_008261.1_142_209	195103.CPF_1814	3.2e-70	271.2	Clostridiaceae													Bacteria	1VNFY@1239,24QJV@186801,2EVHJ@1,33NXY@2,36MVF@31979	NA|NA|NA			NA	NA	NA	NA	NA	NA	NA
NC_008261.1_142_210	195103.CPF_1815	4.2e-98	364	Clostridiaceae	M1-582												Bacteria	1VEVD@1239,24H9S@186801,29Y0M@1,30JTI@2,36ITC@31979	NA|NA|NA	S	Family of unknown function (DUF5317)	Pfam	PF17248	Family of unknown function (DUF5317)	IPR035168	Protein of unknown function DUF5317
NC_008261.1_142_211	195103.CPF_1816	3.3e-78	297.7	Clostridiaceae	yqeD												Bacteria	1VCQV@1239,25AK4@186801,36I1D@31979,COG0398@1,COG0398@2	NA|NA|NA	S	SNARE associated Golgi protein	PANTHER, Pfam, PANTHER	PTHR12677:SF43, PF09335, PTHR12677	SNARE associated Golgi protein	IPR032816, IPR015414	SNARE associated Golgi protein, Transmembrane protein TMEM64	GO:0016021
NC_008261.1_142_212	195103.CPF_1817	1.1e-152	546.2	Clostridiaceae	ecm27			ko:K07301					ko00000,ko02000	2.A.19.5			Bacteria	1TRX0@1239,24ABZ@186801,36EZ7@31979,COG0530@1,COG0530@2	NA|NA|NA	P	K -dependent Na Ca exchanger	Pfam, Pfam, TIGRFAM, PANTHER, PANTHER, Gene3D, Gene3D	PF01699, PF01699, TIGR00367, PTHR10846:SF8, PTHR10846, G3DSA:1.20.1420.30, G3DSA:1.20.58.1130	Sodium/calcium exchanger protein, Sodium/calcium exchanger protein, TIGR00367: K+-dependent Na+/Ca+ exchanger homolog	IPR004837, IPR004837, IPR004481, IPR004481	Sodium/calcium exchanger membrane region, Sodium/calcium exchanger membrane region, Sodium/potassium/calcium exchanger, Sodium/potassium/calcium exchanger	GO:0016021, GO:0055085, GO:0016021, GO:0055085	Reactome: R-HSA-425561, Reactome: R-HSA-425561, Reactome: R-HSA-425561, Reactome: R-HSA-425561
NC_008261.1_142_213	195103.CPF_1818	8.1e-199	699.5	Clostridiaceae	dinB	GO:0000731,GO:0003674,GO:0003824,GO:0003887,GO:0005575,GO:0005622,GO:0005623,GO:0005634,GO:0005654,GO:0005737,GO:0006139,GO:0006259,GO:0006260,GO:0006281,GO:0006301,GO:0006725,GO:0006807,GO:0006950,GO:0006974,GO:0008150,GO:0008152,GO:0009058,GO:0009059,GO:0009987,GO:0016604,GO:0016607,GO:0016740,GO:0016772,GO:0016779,GO:0018130,GO:0019438,GO:0019985,GO:0031974,GO:0031981,GO:0032991,GO:0033554,GO:…	2.7.7.7	ko:K02346					ko00000,ko01000,ko03400				Bacteria	1TP42@1239,24855@186801,36E0M@31979,COG0389@1,COG0389@2	NA|NA|NA	L	Poorly processive, error-prone DNA polymerase involved in untargeted mutagenesis. Copies undamaged DNA at stalled replication forks, which arise in vivo from mismatched or misaligned primer ends. These misaligned primers can be extended by PolIV. Exhibits no 3-5 exonuclease (proofreading) activity. May be involved in translesional synthesis, in conjunction with the beta clamp from PolIII	PANTHER, Pfam, Hamap, Gene3D, SUPERFAMILY, ProSiteProfiles, SUPERFAMILY, Pfam, Gene3D, CDD, PANTHER, Gene3D, Gene3D	PTHR11076, PF00817, MF_01113, G3DSA:3.30.70.270, SSF100879, PS50173, SSF56672, PF11799, G3DSA:3.30.1490.100, cd03586, PTHR11076:SF33, G3DSA:1.10.150.20, G3DSA:2.30.40.20	impB/mucB/samB family, DNA polymerase IV [dinB]., UmuC domain profile., impB/mucB/samB family C-terminal domain, PolY_Pol_IV_kappa	IPR001126, IPR022880, IPR036775, IPR001126, IPR017961, IPR036775, IPR022880	UmuC domain, DNA polymerase IV, DNA polymerase, Y-family, little finger domain superfamily, UmuC domain, DNA polymerase, Y-family, little finger domain, DNA polymerase, Y-family, little finger domain superfamily, DNA polymerase IV	GO:0006281, GO:0003887, GO:0003684, GO:0006281, GO:0006281, GO:0003684, GO:0006281, GO:0003684, GO:0006281, GO:0003887	KEGG: 00230+2.7.7.7|KEGG: 00240+2.7.7.7|Reactome: R-HSA-5656169, KEGG: 00230+2.7.7.7|KEGG: 00240+2.7.7.7|Reactome: R-HSA-5655862|Reactome: R-HSA-5656169|Reactome: R-HSA-5685942|Reactome: R-HSA-5696397|Reactome: R-HSA-5696400|Reactome: R-HSA-6782135|Reactome: R-HSA-6782210, KEGG: 00230+2.7.7.7|KEGG: 00240+2.7.7.7|Reactome: R-HSA-5656169, KEGG: 00230+2.7.7.7|KEGG: 00240+2.7.7.7|Reactome: R-HSA-5656…
NC_008261.1_142_214	195103.CPF_1819	7.5e-104	383.3	Clostridiaceae	ppiB		5.2.1.8	ko:K01802,ko:K03768					ko00000,ko01000,ko03110				Bacteria	1TRHW@1239,247XN@186801,36HY3@31979,COG0652@1,COG0652@2	NA|NA|NA	O	PPIases accelerate the folding of proteins. It catalyzes the cis-trans isomerization of proline imidic peptide bonds in oligopeptides	ProSiteProfiles, SUPERFAMILY, PANTHER, CDD, PIRSF, PRINTS, PRINTS, PRINTS, PRINTS, Pfam, ProSiteProfiles, PANTHER, Gene3D	PS51257, SSF50891, PTHR11071, cd00317, PIRSF001467, PR00153, PR00153, PR00153, PR00153, PF00160, PS50072, PTHR11071:SF316, G3DSA:2.40.100.10	Prokaryotic membrane lipoprotein lipid attachment site profile., cyclophilin, Cyclophilin peptidyl-prolyl cis-trans isomerase signature, Cyclophilin peptidyl-prolyl cis-trans isomerase signature, Cyclophilin peptidyl-prolyl cis-trans isomerase signature, Cyclophilin peptidyl-prolyl cis-trans isomerase signature, Cyclophilin type peptidyl-prolyl cis-trans isomerase/CLD, Cyclophilin-type peptidyl-p…	IPR029000, IPR024936, IPR024936, IPR002130, IPR002130, IPR002130, IPR002130, IPR002130, IPR002130, IPR029000	Cyclophilin-like domain superfamily, Cyclophilin-type peptidyl-prolyl cis-trans isomerase, Cyclophilin-type peptidyl-prolyl cis-trans isomerase, Cyclophilin-type peptidyl-prolyl cis-trans isomerase domain, Cyclophilin-type peptidyl-prolyl cis-trans isomerase domain, Cyclophilin-type peptidyl-prolyl cis-trans isomerase domain, Cyclophilin-type peptidyl-prolyl cis-trans isomerase domain, Cyclophili…	GO:0003755, GO:0003755, GO:0000413, GO:0003755, GO:0000413, GO:0003755, GO:0000413, GO:0003755, GO:0000413, GO:0003755, GO:0000413, GO:0003755, GO:0000413, GO:0003755
NC_008261.1_142_215	195103.CPF_1820	1.2e-70	272.3	Clostridiaceae													Bacteria	1VVFW@1239,24NI0@186801,2F3YQ@1,33WQN@2,36KFF@31979	NA|NA|NA	S	Protein of unknown function (DUF3785)	Pfam	PF12653	Protein of unknown function (DUF3785)	IPR024210	Protein of unknown function DUF3785
NC_008261.1_142_216	195103.CPF_1821	5.1e-153	547	Clostridiaceae													Bacteria	1TREF@1239,25AZZ@186801,36WB6@31979,COG0561@1,COG0561@2	NA|NA|NA	S	hydrolase	TIGRFAM, SFLD, PANTHER, TIGRFAM, ProSitePatterns, Gene3D, Pfam, SUPERFAMILY, SFLD, Gene3D, CDD	TIGR00099, SFLDG01144, PTHR10000, TIGR01484, PS01229, G3DSA:3.40.50.1000, PF08282, SSF56784, SFLDS00003, G3DSA:3.30.1240.10, cd07516	Cof-subfamily: Cof-like hydrolase, C2.B.4: PGP Like, HAD-SF-IIB: HAD hydrolase, family IIB, Hypothetical cof family signature 2., haloacid dehalogenase-like hydrolase, Haloacid Dehalogenase, HAD_Pase	IPR000150, IPR006379, IPR023214, IPR036412	Cof family, HAD-superfamily hydrolase, subfamily IIB, HAD superfamily, HAD-like superfamily	GO:0016787	Reactome: R-HSA-446205
NC_008261.1_142_217	195103.CPF_1822	2.4e-106	391.7	Clostridiaceae	pspA			ko:K03969					ko00000				Bacteria	1UYNB@1239,24CS3@186801,36UA0@31979,COG1842@1,COG1842@2	NA|NA|NA	KT	PspA/IM30 family	Pfam, PANTHER, Coils, MobiDBLite, Coils, PANTHER	PF04012, PTHR31088:SF6, Coil, mobidb-lite, Coil, PTHR31088	PspA/IM30 family, consensus disorder prediction	IPR007157	PspA/IM30
NC_008261.1_142_218	NA	NA	NA	NA	NA	NA	NA	NA	NA	NA	NA	NA	NA	NA	NA	NA	NA	NA	NA	NA	NA	MobiDBLite, MobiDBLite, ProSiteProfiles	mobidb-lite, mobidb-lite, PS51257	consensus disorder prediction, consensus disorder prediction, Prokaryotic membrane lipoprotein lipid attachment site profile.
NC_008261.1_142_219	195103.CPF_1824	9.3e-113	412.9	Clostridiaceae													Bacteria	1VWEQ@1239,24FKD@186801,2F3DY@1,33W7R@2,36EI9@31979	NA|NA|NA			NA	NA	NA	NA	NA	NA	NA
NC_008261.1_142_22	195103.CPF_1627	6.9e-66	256.5	Clostridiaceae													Bacteria	1VK7Z@1239,24P7C@186801,2DS31@1,33EAM@2,36KHA@31979	NA|NA|NA			Gene3D, SUPERFAMILY, Coils	G3DSA:1.10.3680.10, SSF158682, Coil		IPR029024, IPR029024	TerB-like, TerB-like
NC_008261.1_142_220	195103.CPF_1825	0	1523.1	Clostridiaceae	gshA	GO:0003674,GO:0003824,GO:0004357,GO:0005488,GO:0005575,GO:0005622,GO:0005623,GO:0005737,GO:0005829,GO:0006518,GO:0006575,GO:0006749,GO:0006750,GO:0006790,GO:0006807,GO:0006950,GO:0006970,GO:0006972,GO:0008150,GO:0008152,GO:0009058,GO:0009628,GO:0009987,GO:0010035,GO:0010038,GO:0016874,GO:0016879,GO:0016881,GO:0019184,GO:0034641,GO:0042221,GO:0042398,GO:0043043,GO:0043167,GO:0043169,GO:0043603,GO:…	6.3.2.2	ko:K01919	ko00270,ko00480,ko01100,map00270,map00480,map01100	M00118	R00894,R10993	RC00064,RC00090	ko00000,ko00001,ko00002,ko01000			iEC042_1314.EC042_2885	Bacteria	1TPGX@1239,25ER3@186801,36URU@31979,COG0189@1,COG0189@2,COG2918@1,COG2918@2	NA|NA|NA	HJ	belongs to the glutamate--cysteine ligase type 1 family. Type 2 subfamily	TIGRFAM, SUPERFAMILY, SUPERFAMILY, Gene3D, Pfam, ProSiteProfiles, Hamap, Gene3D, Pfam, PANTHER, Gene3D, Gene3D	TIGR01435, SSF56059, SSF55931, G3DSA:3.30.590.20, PF01071, PS50975, MF_00782, G3DSA:3.30.470.20, PF04262, PTHR38761, G3DSA:3.30.1490.20, G3DSA:3.30.470.20	glu_cys_lig_rel: glutamate--cysteine ligase/glutathione synthase, Phosphoribosylglycinamide synthetase, ATP-grasp (A) domain, ATP-grasp fold profile., Glutathione biosynthesis bifunctional protein GshAB [gshAB]., Glutamate-cysteine ligase	IPR006335, IPR014746, IPR020561, IPR011761, IPR006335, IPR007370, IPR006334, IPR013815	Glutathione biosynthesis bifunctional protein GshAB, Glutamine synthetase/guanido kinase, catalytic domain, Phosphoribosylglycinamide synthetase, ATP-grasp (A) domain, ATP-grasp fold, Glutathione biosynthesis bifunctional protein GshAB, Glutamate--cysteine ligase, Glutamate--cysteine ligase, monofunctional, ATP-grasp fold, subdomain 1	GO:0004357, GO:0006750, GO:0003824, GO:0005524, GO:0046872, GO:0004357, GO:0006750, GO:0004357, GO:0006750, GO:0004357, GO:0006750, GO:0005524	KEGG: 00270+6.3.2.2+6.3.2.3|KEGG: 00480+6.3.2.2+6.3.2.3|MetaCyc: PWY-6840|MetaCyc: PWY-7255, KEGG: 00230+6.3.4.13|MetaCyc: PWY-6121|MetaCyc: PWY-6122|MetaCyc: PWY-6277|Reactome: R-HSA-73817, KEGG: 00270+6.3.2.2+6.3.2.3|KEGG: 00480+6.3.2.2+6.3.2.3|MetaCyc: PWY-6840|MetaCyc: PWY-7255, KEGG: 00270+6.3.2.2|KEGG: 00480+6.3.2.2|MetaCyc: PWY-6840|MetaCyc: PWY-7255, KEGG: 00270+6.3.2.2|KEGG: 00480+6.3.2.…
NC_008261.1_142_221	195103.CPF_1826	9.3e-172	609.4	Clostridiaceae				ko:K07001					ko00000				Bacteria	1VDEG@1239,25C91@186801,36ER5@31979,COG1752@1,COG1752@2	NA|NA|NA	S	Patatin-like phospholipase	PANTHER, SUPERFAMILY, Gene3D, PANTHER, CDD, ProSiteProfiles, Pfam, Pfam	PTHR14226, SSF52151, G3DSA:3.40.1090.10, PTHR14226:SF29, cd07209, PS51635, PF01734, PF01734	Pat_hypo_Ecoli_Z1214_like, Patatin-like phospholipase (PNPLA) domain profile., Patatin-like phospholipase, Patatin-like phospholipase	IPR016035, IPR002641, IPR002641, IPR002641	Acyl transferase/acyl hydrolase/lysophospholipase, Patatin-like phospholipase domain, Patatin-like phospholipase domain, Patatin-like phospholipase domain	GO:0006629, GO:0006629, GO:0006629
NC_008261.1_142_222	195103.CPF_1827	3.5e-217	760.8	Clostridiaceae				ko:K06901					ko00000,ko02000	2.A.1.40			Bacteria	1TQC6@1239,2483Q@186801,36DY4@31979,COG2252@1,COG2252@2	NA|NA|NA	S	Permease	PANTHER, Pfam, PANTHER, PIRSF	PTHR43337, PF00860, PTHR43337:SF1, PIRSF005353	Permease family	IPR006043, IPR026033	Xanthine/uracil/vitamin C permease, Purine permease PbuG-like	GO:0016020, GO:0022857, GO:0055085
NC_008261.1_142_223	195103.CPF_1828	8.9e-65	252.7	Clostridiaceae				ko:K06929					ko00000				Bacteria	1VCAF@1239,25DKS@186801,36KMB@31979,COG1832@1,COG1832@2	NA|NA|NA	S	CoA binding domain	Pfam, PANTHER, SUPERFAMILY, Gene3D, SMART	PF13380, PTHR33303, SSF51735, G3DSA:3.40.50.720, SM00881	CoA binding domain	IPR003781, IPR036291, IPR003781	CoA-binding, NAD(P)-binding domain superfamily, CoA-binding	GO:0048037, GO:0048037
NC_008261.1_142_224	195103.CPF_1829	1.4e-167	595.5	Clostridiaceae				ko:K02057		M00221			ko00000,ko00002,ko02000	3.A.1.2			Bacteria	1TP8Y@1239,2486N@186801,36EJH@31979,COG1079@1,COG1079@2	NA|NA|NA	S	Belongs to the binding-protein-dependent transport system permease family	CDD, Pfam, PANTHER, PANTHER	cd06580, PF02653, PTHR43370, PTHR43370:SF1	TM_PBP1_transp_TpRbsC_like, Branched-chain amino acid transport system / permease component	IPR001851	ABC transporter, permease	GO:0016020, GO:0022857, GO:0055085
NC_008261.1_142_225	195103.CPF_1830	1.2e-186	659.1	Clostridiaceae				ko:K02057		M00221			ko00000,ko00002,ko02000	3.A.1.2			Bacteria	1TP1F@1239,2494C@186801,36EKF@31979,COG4603@1,COG4603@2	NA|NA|NA	S	Belongs to the binding-protein-dependent transport system permease family	PANTHER, CDD, PANTHER, Pfam	PTHR32196, cd06580, PTHR32196:SF30, PF02653	TM_PBP1_transp_TpRbsC_like, Branched-chain amino acid transport system / permease component	IPR001851	ABC transporter, permease	GO:0016020, GO:0022857, GO:0055085
NC_008261.1_142_226	195103.CPF_1831	2.5e-278	964.1	Clostridiaceae			3.6.3.17	ko:K02056		M00221			ko00000,ko00002,ko01000,ko02000	3.A.1.2			Bacteria	1UYQA@1239,24XN8@186801,36UI0@31979,COG3845@1,COG3845@2	NA|NA|NA	S	ABC transporter	Pfam, CDD, ProSitePatterns, ProSiteProfiles, ProSiteProfiles, SUPERFAMILY, CDD, SUPERFAMILY, Gene3D, Gene3D, SMART, PANTHER, PANTHER, ProSitePatterns, Pfam	PF00005, cd03216, PS00211, PS50893, PS50893, SSF52540, cd03215, SSF52540, G3DSA:3.40.50.300, G3DSA:3.40.50.300, SM00382, PTHR43790, PTHR43790:SF4, PS00211, PF00005	ABC transporter, ABC_Carb_Monos_I, ABC transporters family signature., ATP-binding cassette, ABC transporter-type domain profile., ATP-binding cassette, ABC transporter-type domain profile., ABC_Carb_Monos_II, ABC transporters family signature., ABC transporter	IPR003439, IPR017871, IPR003439, IPR003439, IPR027417, IPR027417, IPR003593, IPR017871, IPR003439	ABC transporter-like, ABC transporter, conserved site, ABC transporter-like, ABC transporter-like, P-loop containing nucleoside triphosphate hydrolase, P-loop containing nucleoside triphosphate hydrolase, AAA+ ATPase domain, ABC transporter, conserved site, ABC transporter-like	GO:0005524, GO:0016887, GO:0005524, GO:0016887, GO:0005524, GO:0016887, GO:0005524, GO:0016887, GO:0005524, GO:0016887, GO:0005524, GO:0016887
NC_008261.1_142_227	195103.CPF_1832	8.6e-204	716.1	Clostridiaceae	tmpC			ko:K07335					ko00000				Bacteria	1TPEU@1239,248QT@186801,36EW8@31979,COG1744@1,COG1744@2	NA|NA|NA	S	basic membrane	SUPERFAMILY, Gene3D, Gene3D, Pfam, ProSiteProfiles, CDD, PANTHER	SSF53822, G3DSA:3.40.50.2300, G3DSA:3.40.50.2300, PF02608, PS51257, cd06354, PTHR34296	ABC transporter substrate-binding protein PnrA-like, Prokaryotic membrane lipoprotein lipid attachment site profile., PBP1_BmpA_PnrA_like	IPR028082, IPR003760	Periplasmic binding protein-like I, ABC transporter substrate-binding protein PnrA-like	GO:0005886
NC_008261.1_142_228	195103.CPF_1833	1.1e-155	555.8	Clostridiaceae			3.1.4.46	ko:K01126	ko00564,map00564		R01030,R01470	RC00017,RC00425	ko00000,ko00001,ko01000				Bacteria	1VW00@1239,24KGE@186801,36IYW@31979,COG0657@1,COG0657@2	NA|NA|NA	I	Serine hydrolase (FSH1)	SUPERFAMILY, Gene3D, PANTHER, Pfam	SSF53474, G3DSA:3.40.50.1820, PTHR42843, PF07859	alpha/beta hydrolase fold	IPR029058, IPR029058, IPR013094	Alpha/Beta hydrolase fold, Alpha/Beta hydrolase fold, Alpha/beta hydrolase fold-3	GO:0016787
NC_008261.1_142_229	195103.CPF_1834	1.2e-146	525.8	Clostridiaceae	cbiQ			ko:K16785,ko:K16786,ko:K16787	ko02010,map02010	M00582			ko00000,ko00001,ko00002,ko01000,ko02000	3.A.1.25,3.A.1.28,3.A.1.29,3.A.1.30,3.A.1.31,3.A.1.32,3.A.1.33,3.A.1.35		iSB619.SA_RS14165	Bacteria	1TPMV@1239,24AYK@186801,36E9T@31979,COG0619@1,COG0619@2	NA|NA|NA	P	Cobalt transport protein	Pfam, PANTHER, PANTHER	PF02361, PTHR33514:SF1, PTHR33514	Cobalt transport protein	IPR003339	ABC/ECF transporter, transmembrane component
NC_008261.1_142_23	195103.CPF_1628	9.6e-150	536.2	Clostridiaceae				ko:K08974					ko00000				Bacteria	1UYD5@1239,24B08@186801,36G4J@31979,COG2035@1,COG2035@2	NA|NA|NA	S	Domain of unknown function (DUF368)	Pfam, PANTHER	PF04018, PTHR37308	Domain of unknown function (DUF368)	IPR007163, IPR007163	Protein of unknown function DUF368, Protein of unknown function DUF368
NC_008261.1_142_230	195103.CPF_1835	0	1088.2	Clostridiaceae	ykoD	GO:0003674,GO:0003824,GO:0005215,GO:0006810,GO:0008150,GO:0015399,GO:0015405,GO:0016462,GO:0016787,GO:0016817,GO:0016818,GO:0016887,GO:0017111,GO:0022804,GO:0022857,GO:0042623,GO:0042626,GO:0043492,GO:0051179,GO:0051234,GO:0055085		ko:K02006,ko:K16786,ko:K16787	ko02010,map02010	M00245,M00246,M00582			ko00000,ko00001,ko00002,ko01000,ko02000	3.A.1.18,3.A.1.22,3.A.1.23,3.A.1.25,3.A.1.28,3.A.1.29,3.A.1.30,3.A.1.31,3.A.1.32,3.A.1.33,3.A.1.35			Bacteria	1TPH8@1239,248A2@186801,36F82@31979,COG1122@1,COG1122@2	NA|NA|NA	P	Psort location CytoplasmicMembrane, score	SUPERFAMILY, ProSitePatterns, Gene3D, ProSiteProfiles, CDD, ProSitePatterns, PANTHER, ProSiteProfiles, Gene3D, CDD, Pfam, SUPERFAMILY, SMART, SMART, Pfam, PANTHER, Pfam	SSF52540, PS00211, G3DSA:3.40.50.300, PS50893, cd03225, PS00211, PTHR43553:SF12, PS50893, G3DSA:3.40.50.300, cd03225, PF00005, SSF52540, SM00382, SM00382, PF00005, PTHR43553, PF12558	ABC transporters family signature., ATP-binding cassette, ABC transporter-type domain profile., ABC_cobalt_CbiO_domain1, ABC transporters family signature., ATP-binding cassette, ABC transporter-type domain profile., ABC_cobalt_CbiO_domain1, ABC transporter, ABC transporter, ATP-binding cassette cobalt transporter	IPR027417, IPR017871, IPR003439, IPR017871, IPR003439, IPR003439, IPR027417, IPR003593, IPR003593, IPR003439, IPR022216	P-loop containing nucleoside triphosphate hydrolase, ABC transporter, conserved site, ABC transporter-like, ABC transporter, conserved site, ABC transporter-like, ABC transporter-like, P-loop containing nucleoside triphosphate hydrolase, AAA+ ATPase domain, AAA+ ATPase domain, ABC transporter-like, Putative ABC cobalt transporter	GO:0005524, GO:0016887, GO:0005524, GO:0016887, GO:0005524, GO:0016887, GO:0005524, GO:0016887, GO:0005524, GO:0016887, GO:0005524, GO:0016887
NC_008261.1_142_231	195103.CPF_1836	1.2e-94	352.4	Clostridiaceae				ko:K16924,ko:K16927		M00582			ko00000,ko00002,ko02000	3.A.1.29,3.A.1.32			Bacteria	1V1GT@1239,24GT3@186801,36FG5@31979,COG4720@1,COG4720@2	NA|NA|NA	S	ECF-type riboflavin transporter, S component	Hamap, Pfam, PANTHER, Gene3D, PANTHER	MF_01572, PF07155, PTHR37815:SF3, G3DSA:1.10.1760.20, PTHR37815	UPF0397 protein <locus_tag>., ECF-type riboflavin transporter, S component	IPR022914, IPR009825	Protein of unknown function UPF0397, ECF transporter, substrate-specific component-like	GO:0016020
NC_008261.1_142_232	195103.CPF_1837	1.7e-65	255.4	Clostridiaceae	pspE	GO:0003674,GO:0003824,GO:0004792,GO:0005575,GO:0005623,GO:0016740,GO:0016782,GO:0016783,GO:0030288,GO:0030313,GO:0031975,GO:0042597,GO:0044464		ko:K03972					ko00000			iE2348C_1286.E2348C_1500,iECABU_c1320.ECABU_c15910,iSDY_1059.SDY_1936,ic_1306.c1779	Bacteria	1U0PW@1239,24RKU@186801,36KH8@31979,COG0607@1,COG0607@2	NA|NA|NA	P	Rhodanese Homology Domain	Pfam, PANTHER, MobiDBLite, SUPERFAMILY, PANTHER, Gene3D, ProSiteProfiles, SMART, ProSiteProfiles, CDD, MobiDBLite	PF00581, PTHR43084:SF4, mobidb-lite, SSF52821, PTHR43084, G3DSA:3.40.250.10, PS50206, SM00450, PS51257, cd00158, mobidb-lite	Rhodanese-like domain, consensus disorder prediction, Rhodanese domain profile., Prokaryotic membrane lipoprotein lipid attachment site profile., RHOD, consensus disorder prediction	IPR001763, IPR036873, IPR036873, IPR001763, IPR001763	Rhodanese-like domain, Rhodanese-like domain superfamily, Rhodanese-like domain superfamily, Rhodanese-like domain, Rhodanese-like domain
NC_008261.1_142_234	195103.CPF_1839	0	2160.2	Clostridiaceae	pulA		3.2.1.41	ko:K01200	ko00500,ko01100,ko01110,map00500,map01100,map01110		R02111		ko00000,ko00001,ko01000		CBM48,GH13		Bacteria	1TP3M@1239,2481P@186801,36G0Q@31979,COG1523@1,COG1523@2	NA|NA|NA	G	Carbohydrate-binding module 48 (Isoamylase N-terminal domain)	SMART, Gene3D, Pfam, Gene3D, Pfam, Pfam, PANTHER, PANTHER, Gene3D, SUPERFAMILY, SUPERFAMILY, TIGRFAM, Gene3D, CDD, CDD	SM00642, G3DSA:2.60.40.10, PF02922, G3DSA:2.60.40.1180, PF00128, PF00128, PTHR43631, PTHR43631, G3DSA:3.20.20.80, SSF81296, SSF51445, TIGR02104, G3DSA:2.60.40.10, cd11341, cd02860	Carbohydrate-binding module 48 (Isoamylase N-terminal domain), Alpha amylase, catalytic domain, Alpha amylase, catalytic domain, pulA_typeI: pullulanase, type I, AmyAc_Pullulanase_LD-like, E_set_Pullulanase	IPR006047, IPR013783, IPR004193, IPR013780, IPR006047, IPR006047, IPR014756, IPR017853, IPR011840, IPR013783	Glycosyl hydrolase, family 13, catalytic domain, Immunoglobulin-like fold, Glycoside hydrolase, family 13, N-terminal, Glycosyl hydrolase, all-beta, Glycosyl hydrolase, family 13, catalytic domain, Glycosyl hydrolase, family 13, catalytic domain, Immunoglobulin E-set, Glycoside hydrolase superfamily, Pullulanase, type I, Immunoglobulin-like fold	GO:0003824, GO:0005975, GO:0004553, GO:0005975, GO:0003824, GO:0005975, GO:0003824, GO:0005975	Reactome: R-HSA-3322077|Reactome: R-HSA-3878781
NC_008261.1_142_235	195103.CPF_1840	0	1373.2	Clostridiaceae	glgB	GO:0000271,GO:0003674,GO:0003824,GO:0003844,GO:0005575,GO:0005622,GO:0005623,GO:0005737,GO:0005829,GO:0005886,GO:0005975,GO:0005976,GO:0005977,GO:0005978,GO:0006073,GO:0006091,GO:0006112,GO:0006950,GO:0006974,GO:0008150,GO:0008152,GO:0009058,GO:0009059,GO:0009250,GO:0009987,GO:0015980,GO:0016020,GO:0016051,GO:0016740,GO:0016757,GO:0016758,GO:0033554,GO:0033692,GO:0034637,GO:0034645,GO:0040007,GO:…	2.4.1.18,3.2.1.141,3.2.1.20	ko:K00700,ko:K01187,ko:K01236,ko:K17734	ko00052,ko00500,ko01100,ko01110,map00052,map00500,map01100,map01110	M00565	R00028,R00801,R00802,R02110,R06087,R06088,R09995,R11256	RC00028,RC00049,RC00077	ko00000,ko00001,ko00002,ko01000,ko01002,ko04147		CBM48,GH13,GH31	iAPECO1_1312.APECO1_3025,iECNA114_1301.ECNA114_3542,iECOK1_1307.ECOK1_3857,iECS88_1305.ECS88_3830,iECSF_1327.ECSF_3253,iJN678.glgB,iLF82_1304.LF82_0837,iNRG857_1313.NRG857_17030,iUTI89_1310.UTI89_C3941	Bacteria	1TP4M@1239,247WH@186801,36EUN@31979,COG0296@1,COG0296@2	NA|NA|NA	G	Catalyzes the formation of the alpha-1,6-glucosidic linkages in glycogen by scission of a 1,4-alpha-linked oligosaccharide from growing alpha-1,4-glucan chains and the subsequent attachment of the oligosaccharide to the alpha-1,6 position	Hamap, Gene3D, TIGRFAM, SUPERFAMILY, SUPERFAMILY, Pfam, Pfam, Gene3D, MobiDBLite, CDD, SMART, SUPERFAMILY, PIRSF, PANTHER, PANTHER, CDD, Gene3D, Pfam	MF_00685, G3DSA:2.60.40.1180, TIGR01515, SSF81296, SSF51445, PF02806, PF00128, G3DSA:3.20.20.80, mobidb-lite, cd11322, SM00642, SSF51011, PIRSF000463, PTHR43651:SF3, PTHR43651, cd02855, G3DSA:2.60.40.10, PF02922	1,4-alpha-glucan branching enzyme GlgB [glgB]., branching_enzym: 1,4-alpha-glucan branching enzyme, Alpha amylase, C-terminal all-beta domain, Alpha amylase, catalytic domain, consensus disorder prediction, AmyAc_Glg_BE, E_set_GBE_prok_N, Carbohydrate-binding module 48 (Isoamylase N-terminal domain)	IPR006407, IPR013780, IPR006407, IPR014756, IPR017853, IPR006048, IPR006047, IPR006047, IPR037439, IPR037439, IPR013783, IPR004193	1,4-alpha-glucan-branching enzyme, GlgB, Glycosyl hydrolase, all-beta, 1,4-alpha-glucan-branching enzyme, GlgB, Immunoglobulin E-set, Glycoside hydrolase superfamily, Alpha-amylase/branching enzyme, C-terminal all beta, Glycosyl hydrolase, family 13, catalytic domain, Glycosyl hydrolase, family 13, catalytic domain, 1,4-alpha-glucan-branching enzyme, 1,4-alpha-glucan-branching enzyme, Immunoglobu…	GO:0003844, GO:0005978, GO:0003844, GO:0005978, GO:0003824, GO:0005975, GO:0043169, GO:0003824, GO:0005975, GO:0003824, GO:0005975, GO:0003844, GO:0005978, GO:0003844, GO:0005978, GO:0004553, GO:0005975	KEGG: 00500+2.4.1.18|MetaCyc: PWY-5067|MetaCyc: PWY-622|MetaCyc: PWY-7900, KEGG: 00500+2.4.1.18|MetaCyc: PWY-5067|MetaCyc: PWY-622|MetaCyc: PWY-7900, KEGG: 00500+2.4.1.18|MetaCyc: PWY-5067|MetaCyc: PWY-622|MetaCyc: PWY-7900, KEGG: 00500+2.4.1.18|MetaCyc: PWY-5067|MetaCyc: PWY-622|MetaCyc: PWY-7900|Reactome: R-HSA-3322077|Reactome: R-HSA-3878781, KEGG: 00500+2.4.1.18|MetaCyc: PWY-5067|MetaCyc: PWY…
NC_008261.1_142_236	195103.CPF_1841	1.3e-128	465.7	Clostridia													Bacteria	1UTKU@1239,24AYU@186801,28I7X@1,2Z8AS@2	NA|NA|NA			NA	NA	NA	NA	NA	NA	NA
NC_008261.1_142_237	195103.CPF_1842	1.8e-115	422.2	Clostridiaceae	thrE												Bacteria	1TSE8@1239,24A25@186801,36EA1@31979,COG2966@1,COG2966@2	NA|NA|NA	S	hmm pf06738	Coils, Pfam, PANTHER, PANTHER	Coil, PF06738, PTHR34390:SF2, PTHR34390	Putative threonine/serine exporter	IPR010619	Putative threonine/serine exporter
NC_008261.1_142_238	195103.CPF_1843	5.9e-80	303.5	Clostridiaceae													Bacteria	1V6P0@1239,24R80@186801,36JMC@31979,COG3610@1,COG3610@2	NA|NA|NA	S	Threonine/Serine exporter, ThrE	Pfam, PANTHER, PANTHER	PF12821, PTHR34390:SF1, PTHR34390	Threonine/Serine exporter, ThrE	IPR024528	Threonine/Serine exporter, ThrE
NC_008261.1_142_239	195103.CPF_1844	5.8e-143	513.5	Clostridia													Bacteria	1W1K7@1239,254JA@186801,294MJ@1,2ZS10@2	NA|NA|NA			NA	NA	NA	NA	NA	NA	NA
NC_008261.1_142_24	195103.CPF_1629	5.4e-209	733.4	Clostridiaceae				ko:K07496					ko00000				Bacteria	1TRNY@1239,247T1@186801,36E4A@31979,COG0675@1,COG0675@2	NA|NA|NA	L	Transposase	PANTHER, Pfam, PANTHER, Pfam, Coils, Pfam, TIGRFAM	PTHR30405:SF11, PF07282, PTHR30405, PF01385, Coil, PF12323, TIGR01766	Putative transposase DNA-binding domain, Probable transposase, Helix-turn-helix domain, tspaseT_teng_C: transposase, IS605 OrfB family	IPR010095, IPR001959, IPR021027, IPR010095	Transposase IS605, OrfB, C-terminal, Probable transposase, IS891/IS1136/IS1341, Transposase, putative, helix-turn-helix domain, Transposase IS605, OrfB, C-terminal
NC_008261.1_142_240	195103.CPF_1845	1.9e-226	792	Clostridiaceae	mprF		2.3.2.3	ko:K07027,ko:K14205	ko01503,ko02020,ko05150,map01503,map02020,map05150	M00726			ko00000,ko00001,ko00002,ko01000,ko01504,ko02000	2.A.1.3.37,4.D.2			Bacteria	1TQI2@1239,24BRW@186801,36GQE@31979,COG2898@1,COG2898@2	NA|NA|NA	I	Catalyzes the transfer of a lysyl group from L-lysyl- tRNA(Lys) to membrane-bound phosphatidylglycerol (PG), which produces lysylphosphatidylglycerol (LPG), a major component of the bacterial membrane with a positive net charge. LPG synthesis contributes to bacterial virulence as it is involved in the resistance mechanism against cationic antimicrobial peptides (CAMP) produces by the hosts immune…	SUPERFAMILY, Pfam, PANTHER	SSF55729, PF09924, PTHR34697	Uncharacterised conserved protein (DUF2156)	IPR016181, IPR024320	Acyl-CoA N-acyltransferase, Phosphatidylglycerol lysyltransferase, C-terminal
NC_008261.1_142_241	195103.CPF_1847	2.9e-51	207.6	Clostridiaceae				ko:K03671	ko04621,ko05418,map04621,map05418				ko00000,ko00001,ko03110				Bacteria	1VFUD@1239,24R4Y@186801,36MKP@31979,COG0526@1,COG0526@2	NA|NA|NA	CO	Thioredoxin	Gene3D, CDD, Pfam, SUPERFAMILY	G3DSA:3.40.30.10, cd02947, PF00085, SSF52833	TRX_family, Thioredoxin	IPR013766, IPR036249	Thioredoxin domain, Thioredoxin-like superfamily	GO:0045454
NC_008261.1_142_242	195103.CPF_1848	3.5e-185	654.1	Clostridiaceae	axe1		3.1.1.41	ko:K01060	ko00311,ko01130,map00311,map01130		R03062	RC00020,RC00041	ko00000,ko00001,ko01000				Bacteria	1TS02@1239,24A6N@186801,36GP3@31979,COG3458@1,COG3458@2	NA|NA|NA	Q	xylan esterase	Gene3D, PANTHER, Pfam, SUPERFAMILY	G3DSA:3.40.50.1820, PTHR40111, PF05448, SSF53474	Acetyl xylan esterase (AXE1)	IPR029058, IPR039069, IPR008391, IPR029058	Alpha/Beta hydrolase fold, Carbohydrate esterase 7 family, Acetyl xylan esterase, Alpha/Beta hydrolase fold	GO:0016788
NC_008261.1_142_243	195103.CPF_1849	1.2e-157	562.4	Clostridiaceae				ko:K02238		M00429			ko00000,ko00002,ko02044	3.A.11.1,3.A.11.2			Bacteria	1TS9U@1239,249VR@186801,36DFY@31979,COG2333@1,COG2333@2	NA|NA|NA	L	domain protein	PANTHER, SUPERFAMILY, Gene3D, Pfam, CDD, SMART, PANTHER	PTHR30619:SF1, SSF56281, G3DSA:3.60.15.10, PF00753, cd07731, SM00849, PTHR30619	Metallo-beta-lactamase superfamily, ComA-like_MBL-fold	IPR036866, IPR036866, IPR001279, IPR035681, IPR001279	Ribonuclease Z/Hydroxyacylglutathione hydrolase-like, Ribonuclease Z/Hydroxyacylglutathione hydrolase-like, Metallo-beta-lactamase, ComA-like, MBL domain, Metallo-beta-lactamase
NC_008261.1_142_244	195103.CPF_1850	7.9e-135	486.5	Clostridia				ko:K07052					ko00000				Bacteria	1V24Z@1239,24G02@186801,COG1266@1,COG1266@2	NA|NA|NA	S	CAAX protease self-immunity	Pfam, PANTHER	PF02517, PTHR39430	CAAX protease self-immunity	IPR003675	CAAX amino terminal protease	GO:0016020	Reactome: R-HSA-5689880
NC_008261.1_142_245	195103.CPF_1851	2.5e-71	274.6	Clostridiaceae													Bacteria	1VX9H@1239,24K5W@186801,2ETAJ@1,33KUH@2,36JRN@31979	NA|NA|NA	S	Domain of unknown function (DUF3783)	Pfam	PF12646	Domain of unknown function (DUF3783)	IPR016621	Uncharacterised conserved protein UCP014543
NC_008261.1_142_246	195103.CPF_1852	1.7e-94	352.1	Clostridiaceae	tenI	GO:0003674,GO:0003824,GO:0004789,GO:0005575,GO:0005622,GO:0005623,GO:0005737,GO:0006725,GO:0006766,GO:0006767,GO:0006772,GO:0006790,GO:0006807,GO:0008150,GO:0008152,GO:0009058,GO:0009110,GO:0009228,GO:0009987,GO:0016740,GO:0016765,GO:0017144,GO:0018130,GO:0019438,GO:0034641,GO:0042364,GO:0042723,GO:0042724,GO:0044237,GO:0044249,GO:0044271,GO:0044272,GO:0044281,GO:0044283,GO:0044424,GO:0044464,GO:…	2.5.1.3,5.3.99.10	ko:K00788,ko:K10810	ko00730,ko01100,map00730,map01100	M00127	R03223,R09977,R10712	RC00224,RC02766,RC03255,RC03397	ko00000,ko00001,ko00002,ko01000,ko03000			iHN637.CLJU_RS06600	Bacteria	1V4SE@1239,24JTR@186801,36K0X@31979,COG0352@1,COG0352@2	NA|NA|NA	H	Thiamine monophosphate synthase	PANTHER, Gene3D, CDD, Pfam, SUPERFAMILY	PTHR20857, G3DSA:3.20.20.70, cd00564, PF02581, SSF51391	TMP_TenI, Thiamine monophosphate synthase	IPR013785, IPR022998, IPR022998, IPR036206	Aldolase-type TIM barrel, Thiamine phosphate synthase/TenI, Thiamine phosphate synthase/TenI, Thiamin phosphate synthase superfamily	GO:0003824	KEGG: 00730+2.5.1.3|MetaCyc: PWY-6893|MetaCyc: PWY-6894|MetaCyc: PWY-6897|MetaCyc: PWY-6907|MetaCyc: PWY-6908|MetaCyc: PWY-7356|MetaCyc: PWY-7357, KEGG: 00730+2.5.1.3|MetaCyc: PWY-6893|MetaCyc: PWY-6894|MetaCyc: PWY-6897|MetaCyc: PWY-6907|MetaCyc: PWY-6908|MetaCyc: PWY-7356|MetaCyc: PWY-7357, KEGG: 00730+2.5.1.3|MetaCyc: PWY-6893|MetaCyc: PWY-6894|MetaCyc: PWY-6897|MetaCyc: PWY-6907|MetaCyc: PWY-…
NC_008261.1_142_247	195103.CPF_1853	2.3e-209	734.6	Clostridiaceae	thiH	GO:0003674,GO:0003824,GO:0005488,GO:0006725,GO:0006766,GO:0006767,GO:0006772,GO:0006790,GO:0006807,GO:0006950,GO:0006974,GO:0008150,GO:0008152,GO:0009058,GO:0009110,GO:0009228,GO:0009987,GO:0016829,GO:0016830,GO:0017144,GO:0018130,GO:0019438,GO:0033554,GO:0034641,GO:0036355,GO:0042364,GO:0042723,GO:0042724,GO:0044237,GO:0044249,GO:0044271,GO:0044272,GO:0044281,GO:0044283,GO:0046483,GO:0048037,GO:…	4.1.99.19	ko:K03150	ko00730,ko01100,map00730,map01100		R10246	RC01434,RC03095	ko00000,ko00001,ko01000			iPC815.YPO3743,iSF_1195.SF4062,iSFxv_1172.SFxv_4429,iS_1188.S3673	Bacteria	1TPEX@1239,248PF@186801,36F0H@31979,COG0502@1,COG0502@2	NA|NA|NA	C	biosynthesis protein ThiH	SFLD, CDD, Pfam, Gene3D, SMART, Pfam, PANTHER, SUPERFAMILY, TIGRFAM, PANTHER, SFLD	SFLDS00029, cd01335, PF06968, G3DSA:3.20.20.70, SM00876, PF04055, PTHR43583, SSF102114, TIGR02351, PTHR43583:SF1, SFLDF00301	Radical SAM, Radical_SAM, Biotin and Thiamin Synthesis associated domain, Radical SAM superfamily, thiH: thiazole biosynthesis protein ThiH, 2-iminoacetate synthase (ThiH)	IPR007197, IPR010722, IPR013785, IPR010722, IPR007197, IPR012726, IPR012726, IPR012726	Radical SAM, Biotin and thiamin synthesis-associated domain, Aldolase-type TIM barrel, Biotin and thiamin synthesis-associated domain, Radical SAM, Thiazole biosynthesis ThiH, Thiazole biosynthesis ThiH, Thiazole biosynthesis ThiH	GO:0003824, GO:0051536, GO:0003824, GO:0003824, GO:0051536, GO:0005506, GO:0009228, GO:0051539, GO:0005506, GO:0009228, GO:0051539, GO:0005506, GO:0009228, GO:0051539	KEGG: 00780+2.8.1.6|MetaCyc: PWY-7380, KEGG: 00780+2.8.1.6|MetaCyc: PWY-7380, KEGG: 00730+4.1.99.19|MetaCyc: PWY-6892, KEGG: 00730+4.1.99.19|MetaCyc: PWY-6892, KEGG: 00730+4.1.99.19|MetaCyc: PWY-6892
NC_008261.1_142_248	195103.CPF_1854	1.4e-136	492.3	Clostridiaceae	thiG	GO:0003674,GO:0003824,GO:0005575,GO:0005622,GO:0005623,GO:0005737,GO:0005829,GO:0006725,GO:0006766,GO:0006767,GO:0006772,GO:0006790,GO:0006807,GO:0008150,GO:0008152,GO:0009058,GO:0009110,GO:0009228,GO:0009987,GO:0017144,GO:0018130,GO:0019438,GO:0034641,GO:0042364,GO:0042723,GO:0042724,GO:0044237,GO:0044249,GO:0044271,GO:0044272,GO:0044281,GO:0044283,GO:0044424,GO:0044444,GO:0044464,GO:0046483,GO:…	2.8.1.10	ko:K03149	ko00730,ko01100,map00730,map01100		R10247	RC03096,RC03097,RC03461	ko00000,ko00001,ko01000			iECABU_c1320.ECABU_c45060,iECO26_1355.ECO26_5099,ic_1306.c4947	Bacteria	1TQZ1@1239,247TJ@186801,36G8Q@31979,COG2022@1,COG2022@2	NA|NA|NA	H	Catalyzes the rearrangement of 1-deoxy-D-xylulose 5- phosphate (DXP) to produce the thiazole phosphate moiety of thiamine. Sulfur is provided by the thiocarboxylate moiety of the carrier protein ThiS. In vitro, sulfur can be provided by H(2)S	Pfam, Hamap, Gene3D, PANTHER, CDD, SUPERFAMILY	PF05690, MF_00443, G3DSA:3.20.20.70, PTHR34266, cd04728, SSF110399	Thiazole biosynthesis protein ThiG, Thiazole synthase [thiG]., ThiG	IPR033983, IPR008867, IPR013785, IPR008867, IPR008867	Thiazole synthase ThiG, Thiazole synthase, Aldolase-type TIM barrel, Thiazole synthase, Thiazole synthase	GO:0009228, GO:0003824, GO:0009228, GO:0009228	KEGG: 00730+2.8.1.10|MetaCyc: PWY-6891|MetaCyc: PWY-6892, KEGG: 00730+2.8.1.10|MetaCyc: PWY-6891|MetaCyc: PWY-6892, KEGG: 00730+2.8.1.10|MetaCyc: PWY-6891|MetaCyc: PWY-6892, KEGG: 00730+2.8.1.10|MetaCyc: PWY-6891|MetaCyc: PWY-6892
NC_008261.1_142_249	195103.CPF_1855	1.6e-106	392.5	Clostridiaceae	thiF		2.7.7.73,2.7.7.80	ko:K03148,ko:K21029	ko00730,ko01100,ko04122,map00730,map01100,map04122		R07459	RC00043	ko00000,ko00001,ko01000				Bacteria	1UYFC@1239,247UZ@186801,36F4H@31979,COG0476@1,COG0476@2	NA|NA|NA	H	Thiamine biosynthesis protein ThiF	TIGRFAM, SUPERFAMILY, Gene3D, PANTHER, Pfam, PANTHER, Pfam, CDD	TIGR02354, SSF69572, G3DSA:3.40.50.720, PTHR43267:SF3, PF14453, PTHR43267, PF00899, cd01487	thiF_fam2: thiamine biosynthesis protein ThiF, ThiS-like ubiquitin, ThiF family, E1_ThiF_like	IPR012729, IPR035985, IPR032726, IPR000594, IPR012729	Thiamine biosynthesis protein ThiF, Ubiquitin-activating enzyme, ThiS-like ubiquitin domain, THIF-type NAD/FAD binding fold, Thiamine biosynthesis protein ThiF	GO:0008641, GO:0008641
NC_008261.1_142_25	1292035.H476_0285	1.2e-39	168.7	Clostridia													Bacteria	1UZ1U@1239,24F52@186801,COG2452@1,COG2452@2	NA|NA|NA	L	SMART HTH transcriptional regulator, MerR	SUPERFAMILY, PANTHER, Coils	SSF53041, PTHR36172, Coil		IPR036162	Resolvase-like, N-terminal catalytic domain superfamily	GO:0000150, GO:0003677, GO:0006310
NC_008261.1_142_250	195103.CPF_1856	5e-27	126.3	Bacteria	thiS			ko:K03154	ko04122,map04122				ko00000,ko00001				Bacteria	COG2104@1,COG2104@2	NA|NA|NA	H	thiamine diphosphate biosynthetic process	Pfam, PANTHER, CDD, SUPERFAMILY, TIGRFAM, Gene3D	PF02597, PTHR34472, cd00565, SSF54285, TIGR01683, G3DSA:3.10.20.30	ThiS family, ThiS, thiS: thiamine biosynthesis protein ThiS	IPR003749, IPR010035, IPR016155, IPR010035, IPR012675	Sulfur carrier ThiS/MoaD-like, ThiS, thiamine-biosynthesis, Molybdopterin synthase/thiamin biosynthesis sulphur carrier, beta-grasp, ThiS, thiamine-biosynthesis, Beta-grasp domain superfamily		Reactome: R-HSA-947581
NC_008261.1_142_251	195103.CPF_1857	9.5e-303	1045.4	Clostridiaceae													Bacteria	1TPHW@1239,2492B@186801,36DEV@31979,COG0477@1,COG0477@2	NA|NA|NA	EGP	TIGRFAM drug resistance transporter, EmrB QacA subfamily	CDD, Pfam, Gene3D, ProSitePatterns, ProSiteProfiles, PANTHER, PANTHER, Gene3D, SUPERFAMILY	cd06174, PF07690, G3DSA:1.20.1250.20, PS00216, PS50850, PTHR23501:SF10, PTHR23501, G3DSA:1.20.1720.10, SSF103473	MFS, Major Facilitator Superfamily, Sugar transport proteins signature 1., Major facilitator superfamily (MFS) profile.	IPR020846, IPR011701, IPR005829, IPR020846, IPR036259	Major facilitator superfamily domain, Major facilitator superfamily, Sugar transporter, conserved site, Major facilitator superfamily domain, MFS transporter superfamily	GO:0016021, GO:0055085, GO:0005215, GO:0016021, GO:0055085
NC_008261.1_142_252	195103.CPF_1858	1.2e-146	525.8	Clostridiaceae			2.7.6.5	ko:K00951,ko:K07816	ko00230,map00230		R00429	RC00002,RC00078	ko00000,ko00001,ko01000				Bacteria	1V0VY@1239,24A69@186801,36EK9@31979,COG2357@1,COG2357@2	NA|NA|NA	S	RelA SpoT domain protein	SUPERFAMILY, PANTHER, Gene3D, Coils, CDD, SMART, Pfam	SSF81301, PTHR41773, G3DSA:3.30.460.10, Coil, cd05399, SM00954, PF04607	NT_Rel-Spo_like, Region found in RelA / SpoT proteins	IPR007685, IPR007685, IPR007685	RelA/SpoT, RelA/SpoT, RelA/SpoT	GO:0015969, GO:0015969, GO:0015969
NC_008261.1_142_253	195103.CPF_1859	2.6e-49	201.1	Clostridiaceae													Bacteria	1V1G6@1239,24RM4@186801,2DRY9@1,33DNC@2,36NHQ@31979	NA|NA|NA	S	Psort location Cytoplasmic, score	NA	NA	NA	NA	NA	NA	NA
NC_008261.1_142_254	195103.CPF_1860	4.8e-81	307	Clostridiaceae	msrB		1.8.4.11,1.8.4.12	ko:K07305,ko:K12267					ko00000,ko01000				Bacteria	1UPN0@1239,25HJF@186801,36IR9@31979,COG0229@1,COG0229@2	NA|NA|NA	O	methionine sulfoxide reductase	ProSiteProfiles, Gene3D, PANTHER, Pfam, Hamap, TIGRFAM, PANTHER, SUPERFAMILY	PS51790, G3DSA:2.170.150.20, PTHR10173:SF53, PF01641, MF_01400, TIGR00357, PTHR10173, SSF51316	Methionine-R-sulfoxide reductase (MsrB) domain profile., SelR domain, Peptide methionine sulfoxide reductase MsrB [msrB]., TIGR00357: methionine-R-sulfoxide reductase	IPR002579, IPR002579, IPR002579, IPR002579, IPR028427, IPR011057	Peptide methionine sulphoxide reductase MrsB, Peptide methionine sulphoxide reductase MrsB, Peptide methionine sulphoxide reductase MrsB, Peptide methionine sulphoxide reductase MrsB, Peptide methionine sulfoxide reductase, Mss4-like superfamily	GO:0033743, GO:0055114, GO:0033743, GO:0055114, GO:0033743, GO:0055114, GO:0033743, GO:0055114, GO:0006979, GO:0016671, GO:0030091	Reactome: R-HSA-5676934, Reactome: R-HSA-5676934, Reactome: R-HSA-5676934, Reactome: R-HSA-5676934, Reactome: R-HSA-5676934
NC_008261.1_142_255	195103.CPF_1861	2.8e-114	417.9	Clostridiaceae			3.2.1.8	ko:K01181,ko:K06889					ko00000,ko01000				Bacteria	1V44R@1239,25ER4@186801,36I6J@31979,COG1073@1,COG1073@2	NA|NA|NA	S	alpha beta	PIRSF, SUPERFAMILY, Gene3D	PIRSF033634, SSF53474, G3DSA:3.40.50.1820		IPR017018, IPR029058, IPR029058	Uncharacterised conserved protein UCP033634, Alpha/Beta hydrolase fold, Alpha/Beta hydrolase fold
NC_008261.1_142_257	195103.CPF_1863	2.1e-177	628.2	Clostridiaceae													Bacteria	1TYRH@1239,24GVR@186801,36I2Q@31979,COG0726@1,COG0726@2	NA|NA|NA	G	deacetylase	PANTHER, MobiDBLite, Gene3D, MobiDBLite, CDD, ProSiteProfiles, SUPERFAMILY, Pfam, PANTHER	PTHR10587:SF97, mobidb-lite, G3DSA:3.20.20.370, mobidb-lite, cd10944, PS51677, SSF88713, PF01522, PTHR10587	consensus disorder prediction, consensus disorder prediction, CE4_SmPgdA_like, NodB homology domain profile., Polysaccharide deacetylase	IPR002509, IPR011330, IPR002509	NodB homology domain, Glycoside hydrolase/deacetylase, beta/alpha-barrel, NodB homology domain	GO:0005975, GO:0016810, GO:0003824, GO:0005975, GO:0005975, GO:0016810
NC_008261.1_142_259	195103.CPF_1865	2.4e-105	388.3	Clostridiaceae													Bacteria	1V3J1@1239,24IF0@186801,36VSJ@31979,COG0398@1,COG0398@2	NA|NA|NA	S	SNARE associated Golgi protein	PANTHER, PANTHER, Pfam	PTHR12677:SF42, PTHR12677, PF09335	SNARE associated Golgi protein	IPR015414, IPR032816	Transmembrane protein TMEM64, SNARE associated Golgi protein	GO:0016021
NC_008261.1_142_26	1292035.H476_0285	5.5e-43	180.3	Clostridia													Bacteria	1UZ1U@1239,24F52@186801,COG2452@1,COG2452@2	NA|NA|NA	L	SMART HTH transcriptional regulator, MerR	ProSiteProfiles, Gene3D, SUPERFAMILY, Pfam, CDD, Pfam, SUPERFAMILY, PANTHER, PANTHER, Gene3D	PS51736, G3DSA:1.10.1660.10, SSF53041, PF00239, cd04762, PF13411, SSF46955, PTHR30461:SF18, PTHR30461, G3DSA:3.40.50.1390	Resolvase/invertase-type recombinase catalytic domain profile., Resolvase, N terminal domain, HTH_MerR-trunc, MerR HTH family regulatory protein	IPR006119, IPR036162, IPR006119, IPR000551, IPR009061	Resolvase, N-terminal catalytic domain, Resolvase-like, N-terminal catalytic domain superfamily, Resolvase, N-terminal catalytic domain, MerR-type HTH domain, Putative DNA-binding domain superfamily	GO:0000150, GO:0003677, GO:0006310, GO:0000150, GO:0003677, GO:0006310, GO:0000150, GO:0003677, GO:0006310, GO:0003677, GO:0006355
NC_008261.1_142_261	195103.CPF_1867	6.6e-126	457.6	Clostridiaceae				ko:K21471					ko00000,ko01000,ko01002,ko01011				Bacteria	1TQ5I@1239,248ZG@186801,36FVZ@31979,COG4942@1,COG4942@2	NA|NA|NA	D	Peptidase, M23	Gene3D, MobiDBLite, PANTHER, Gene3D, MobiDBLite, Coils, MobiDBLite, Pfam, SUPERFAMILY, MobiDBLite, Coils	G3DSA:1.20.5.340, mobidb-lite, PTHR45330, G3DSA:2.70.70.10, mobidb-lite, Coil, mobidb-lite, PF01551, SSF51261, mobidb-lite, Coil	consensus disorder prediction, consensus disorder prediction, consensus disorder prediction, Peptidase family M23, consensus disorder prediction	IPR011055, IPR016047, IPR011055	Duplicated hybrid motif, Peptidase M23, Duplicated hybrid motif
NC_008261.1_142_263	195103.CPF_1869	3.2e-26	123.6	Clostridiaceae													Bacteria	1UU50@1239,255I6@186801,2BEGE@1,3287R@2,36TS1@31979	NA|NA|NA			NA	NA	NA	NA	NA	NA	NA
NC_008261.1_142_264	195103.CPF_1870	4.7e-64	250.4	Clostridiaceae													Bacteria	1VHAS@1239,24RCP@186801,2E78Z@1,331SK@2,36MJ1@31979	NA|NA|NA			NA	NA	NA	NA	NA	NA	NA
NC_008261.1_142_265	195103.CPF_1871	3.8e-38	163.7	Clostridiaceae													Bacteria	1VGBC@1239,24PN9@186801,2E97I@1,333G1@2,36M64@31979	NA|NA|NA	S	Protein of unknown function (DUF1292)	Hamap, Pfam	MF_01448, PF06949	UPF0473 protein <locus_tag>., Protein of unknown function (DUF1292)	IPR009711, IPR009711	Uncharacterised protein family UPF0473, Uncharacterised protein family UPF0473
NC_008261.1_142_266	195103.CPF_1872	0	1471.1	Clostridiaceae			3.6.4.12	ko:K03657	ko03420,ko03430,map03420,map03430				ko00000,ko00001,ko01000,ko03400				Bacteria	1TP39@1239,249IG@186801,36E3M@31979,COG3973@1,COG3973@2	NA|NA|NA	L	DNA helicase	Pfam, Gene3D, SUPERFAMILY, PANTHER, Coils, Coils, ProSiteProfiles, Gene3D, Gene3D, PANTHER	PF00580, G3DSA:3.40.50.300, SSF52540, PTHR11070:SF17, Coil, Coil, PS51198, G3DSA:3.40.50.300, G3DSA:3.40.50.300, PTHR11070	UvrD/REP helicase N-terminal domain, UvrD-like DNA helicase ATP-binding domain profile.	IPR034739, IPR027417, IPR014016, IPR000212	UvrD/AddA helicase, N-terminal, P-loop containing nucleoside triphosphate hydrolase, UvrD-like helicase, ATP-binding domain, DNA helicase, UvrD/REP type	GO:0005524, GO:0005524, GO:0003677, GO:0004003, GO:0005524
NC_008261.1_142_267	195103.CPF_1873	8.1e-79	299.7	Clostridiaceae			1.16.3.1	ko:K03594	ko00860,map00860		R00078	RC02758	ko00000,ko00001,ko01000				Bacteria	1V7ZC@1239,24V91@186801,36PRB@31979,COG1633@1,COG1633@2	NA|NA|NA	S	Domain of unknown function (DUF2383)	SUPERFAMILY, Pfam, Gene3D	SSF47240, PF09537, G3DSA:1.20.1260.10	Domain of unknown function (DUF2383)	IPR009078, IPR019052, IPR012347	Ferritin-like superfamily, Domain of unknown function DUF2383, Ferritin-like
NC_008261.1_142_268	195103.CPF_1874	7.2e-144	516.5	Clostridiaceae													Bacteria	1UZ78@1239,24BM7@186801,36HHI@31979,COG3965@1,COG3965@2	NA|NA|NA	P	Cation efflux family	PANTHER, SUPERFAMILY, Pfam, Gene3D	PTHR43840, SSF161111, PF01545, G3DSA:1.20.1510.10	Cation efflux family	IPR027469, IPR002524, IPR027469	Cation efflux transmembrane domain superfamily, Cation efflux protein, Cation efflux transmembrane domain superfamily	GO:0006812, GO:0008324, GO:0016021, GO:0055085
NC_008261.1_142_269	1304284.L21TH_1445	1e-22	114.4	Clostridiaceae													Bacteria	1UTKU@1239,24AYU@186801,28I7X@1,2Z8AS@2,36G0X@31979	NA|NA|NA			NA	NA	NA	NA	NA	NA	NA
NC_008261.1_142_27	195103.CPF_1631	3.9e-142	510.8	Clostridiaceae	vanY		3.4.17.14	ko:K07260	ko00550,ko01100,ko01502,ko02020,map00550,map01100,map01502,map02020	M00651			ko00000,ko00001,ko00002,ko01000,ko01002,ko01011,ko01504				Bacteria	1V1F7@1239,24E6R@186801,36FGW@31979,COG1876@1,COG1876@2	NA|NA|NA	M	PFAM peptidase M15B and M15C, D,D-carboxypeptidase VanY endolysin	SUPERFAMILY, PANTHER, Pfam, Coils, Gene3D	SSF55166, PTHR34385, PF02557, Coil, G3DSA:3.30.1380.10	D-alanyl-D-alanine carboxypeptidase	IPR009045, IPR003709, IPR009045	Hedgehog signalling/DD-peptidase zinc-binding domain superfamily, Peptidase M15B, Hedgehog signalling/DD-peptidase zinc-binding domain superfamily	GO:0006508, GO:0008233	Reactome: R-HSA-373080|Reactome: R-HSA-5358346|Reactome: R-HSA-5362798|Reactome: R-HSA-5632681|Reactome: R-HSA-5632684|Reactome: R-HSA-5635838|Reactome: R-HSA-5658034, Reactome: R-HSA-373080|Reactome: R-HSA-5358346|Reactome: R-HSA-5362798|Reactome: R-HSA-5632681|Reactome: R-HSA-5632684|Reactome: R-HSA-5635838|Reactome: R-HSA-5658034
NC_008261.1_142_270	195103.CPF_1876	1.3e-114	419.1	Clostridiaceae													Bacteria	1UGD7@1239,24P35@186801,29V95@1,30GP4@2,36KN5@31979	NA|NA|NA			ProSiteProfiles	PS51257	Prokaryotic membrane lipoprotein lipid attachment site profile.
NC_008261.1_142_271	195103.CPF_1877	0	1199.9	Clostridiaceae													Bacteria	1TQSC@1239,249GV@186801,36FMS@31979,COG1289@1,COG1289@2	NA|NA|NA	S	Fusaric acid resistance protein-like	Pfam, PANTHER	PF13515, PTHR30509	Fusaric acid resistance protein-like
NC_008261.1_142_272	195103.CPF_1878	0	2100.9	Clostridiaceae	snf		2.7.11.1	ko:K08282					ko00000,ko01000				Bacteria	1TPFZ@1239,248ZJ@186801,36DK9@31979,COG0553@1,COG0553@2,COG4715@1,COG4715@2	NA|NA|NA	L	snf2 family	PANTHER, Gene3D, CDD, ProSiteProfiles, Pfam, Pfam, SMART, ProSiteProfiles, PANTHER, Coils, Gene3D, CDD, SUPERFAMILY, Pfam, Gene3D, SUPERFAMILY, ProSiteProfiles, SMART, Pfam	PTHR10799:SF845, G3DSA:1.20.120.850, cd00079, PS51192, PF00176, PF00271, SM00487, PS50966, PTHR10799, Coil, G3DSA:3.40.50.300, cd00046, SSF52540, PF08455, G3DSA:3.40.50.10810, SSF52540, PS51194, SM00490, PF04434	HELICc, Superfamilies 1 and 2 helicase ATP-binding type-1 domain profile., SNF2 family N-terminal domain, Helicase conserved C-terminal domain, Zinc finger SWIM-type profile., DEXDc, Bacterial SNF2 helicase associated, Superfamilies 1 and 2 helicase C-terminal domain profile., SWIM zinc finger	IPR001650, IPR014001, IPR000330, IPR001650, IPR014001, IPR007527, IPR027417, IPR013663, IPR038718, IPR027417, IPR001650, IPR001650, IPR007527	Helicase, C-terminal, Helicase superfamily 1/2, ATP-binding domain, SNF2-related, N-terminal domain, Helicase, C-terminal, Helicase superfamily 1/2, ATP-binding domain, Zinc finger, SWIM-type, P-loop containing nucleoside triphosphate hydrolase, Helicase, SWF/SNF/SWI type, bacterial, SNF2-like, N-terminal domain superfamily, P-loop containing nucleoside triphosphate hydrolase, Helicase, C-termina…	GO:0005524, GO:0008270, GO:0008270
NC_008261.1_142_273	195103.CPF_1879	3e-91	341.3	Clostridiaceae				ko:K02529					ko00000,ko03000				Bacteria	1TQ7K@1239,247M2@186801,36F5I@31979,COG1609@1,COG1609@2	NA|NA|NA	K	Transcriptional regulator, LacI family	CDD, SMART, Gene3D, PANTHER, SUPERFAMILY, ProSitePatterns, PANTHER, ProSiteProfiles, SUPERFAMILY, Gene3D, Pfam, CDD, Pfam	cd06267, SM00354, G3DSA:3.40.50.2300, PTHR30146, SSF53822, PS00356, PTHR30146:SF94, PS50932, SSF47413, G3DSA:1.10.260.40, PF00356, cd01392, PF00532	PBP1_LacI_sugar_binding_like, LacI-type HTH domain signature., LacI-type HTH domain profile., Bacterial regulatory proteins, lacI family, HTH_LacI, Periplasmic binding proteins and sugar binding domain of LacI family	IPR000843, IPR028082, IPR000843, IPR010982, IPR000843, IPR000843, IPR001761	LacI-type HTH domain, Periplasmic binding protein-like I, LacI-type HTH domain, Lambda repressor-like, DNA-binding domain superfamily, LacI-type HTH domain, LacI-type HTH domain, Periplasmic binding protein/LacI sugar binding domain	GO:0003677, GO:0006355, GO:0003677, GO:0006355, GO:0003677, GO:0003677, GO:0006355, GO:0003677, GO:0006355
NC_008261.1_142_274	1415775.U729_2351	8.2e-120	436.8	Clostridiaceae	rbsB	GO:0003674,GO:0005215,GO:0005488,GO:0005575,GO:0005623,GO:0005886,GO:0006810,GO:0006935,GO:0008150,GO:0008643,GO:0009605,GO:0015144,GO:0015145,GO:0015749,GO:0015750,GO:0015752,GO:0016020,GO:0016021,GO:0022857,GO:0030246,GO:0030288,GO:0030313,GO:0031224,GO:0031975,GO:0034219,GO:0036094,GO:0040011,GO:0042221,GO:0042330,GO:0042597,GO:0044425,GO:0044464,GO:0048029,GO:0050896,GO:0050918,GO:0051119,GO:…		ko:K10439	ko02010,ko02030,map02010,map02030	M00212			ko00000,ko00001,ko00002,ko02000	3.A.1.2.1,3.A.1.2.13,3.A.1.2.19			Bacteria	1TQ1B@1239,247K8@186801,36DBX@31979,COG1879@1,COG1879@2	NA|NA|NA	G	PFAM periplasmic binding protein	ProSiteProfiles, PANTHER, Gene3D, PANTHER, SUPERFAMILY, Gene3D, Pfam, CDD	PS51257, PTHR32196:SF60, G3DSA:3.40.50.2300, PTHR32196, SSF53822, G3DSA:3.40.50.2300, PF13407, cd06323	Prokaryotic membrane lipoprotein lipid attachment site profile., Periplasmic binding protein domain, PBP1_ribose_binding	IPR028082, IPR025997	Periplasmic binding protein-like I, Periplasmic binding protein
NC_008261.1_142_275	195103.CPF_1881	3.1e-154	551.2	Clostridiaceae	rbsC			ko:K10440	ko02010,map02010	M00212			ko00000,ko00001,ko00002,ko02000	3.A.1.2.1,3.A.1.2.13,3.A.1.2.19			Bacteria	1TP72@1239,249FA@186801,36DTM@31979,COG1172@1,COG1172@2	NA|NA|NA	G	Belongs to the binding-protein-dependent transport system permease family	PANTHER, PANTHER, Pfam, CDD	PTHR32196, PTHR32196:SF21, PF02653, cd06579	Branched-chain amino acid transport system / permease component, TM_PBP1_transp_AraH_like	IPR001851	ABC transporter, permease	GO:0016020, GO:0022857, GO:0055085
NC_008261.1_142_276	195103.CPF_1882	1.1e-275	955.3	Clostridiaceae	rbsA	GO:0000166,GO:0003674,GO:0003824,GO:0005215,GO:0005488,GO:0005524,GO:0005575,GO:0005623,GO:0005886,GO:0006810,GO:0008144,GO:0008150,GO:0008643,GO:0015144,GO:0015145,GO:0015146,GO:0015399,GO:0015405,GO:0015407,GO:0015591,GO:0015608,GO:0015611,GO:0015749,GO:0015750,GO:0015752,GO:0016020,GO:0016021,GO:0016462,GO:0016787,GO:0016817,GO:0016818,GO:0016887,GO:0017076,GO:0017111,GO:0022804,GO:0022857,GO:…	3.6.3.17	ko:K10441,ko:K10542	ko02010,map02010	M00212,M00214			ko00000,ko00001,ko00002,ko01000,ko02000	3.A.1.2.1,3.A.1.2.13,3.A.1.2.19,3.A.1.2.3		iEC55989_1330.EC55989_4224,iECSE_1348.ECSE_4039,iECW_1372.ECW_m4052,iEcE24377_1341.EcE24377A_4265,iWFL_1372.ECW_m4052,iYL1228.KPN_04154	Bacteria	1TP6I@1239,247II@186801,36DME@31979,COG1129@1,COG1129@2	NA|NA|NA	P	import. Responsible for energy coupling to the transport system	ProSitePatterns, SUPERFAMILY, Gene3D, CDD, SUPERFAMILY, ProSiteProfiles, Pfam, Pfam, ProSiteProfiles, PANTHER, PANTHER, SMART, SMART, ProSiteProfiles, CDD, Gene3D	PS00211, SSF52540, G3DSA:3.40.50.300, cd03216, SSF52540, PS50893, PF00005, PF00005, PS50893, PTHR43790, PTHR43790:SF3, SM00382, SM00382, PS51254, cd03215, G3DSA:3.40.50.300	ABC transporters family signature., ABC_Carb_Monos_I, ATP-binding cassette, ABC transporter-type domain profile., ABC transporter, ABC transporter, ATP-binding cassette, ABC transporter-type domain profile., Ribose import ATP-binding protein rbsA family profile., ABC_Carb_Monos_II	IPR017871, IPR027417, IPR027417, IPR003439, IPR003439, IPR003439, IPR003439, IPR003593, IPR003593, IPR015861	ABC transporter, conserved site, P-loop containing nucleoside triphosphate hydrolase, P-loop containing nucleoside triphosphate hydrolase, ABC transporter-like, ABC transporter-like, ABC transporter-like, ABC transporter-like, AAA+ ATPase domain, AAA+ ATPase domain, ABC transporter, ribose import, RbsA	GO:0005524, GO:0016887, GO:0005524, GO:0016887, GO:0005524, GO:0016887, GO:0005524, GO:0016887, GO:0005524, GO:0016887, GO:0005524, GO:0008643, GO:0016020, GO:0043211
NC_008261.1_142_277	195103.CPF_1883	5.2e-63	246.9	Clostridiaceae	rbsD	GO:0003674,GO:0003824,GO:0005215,GO:0005488,GO:0005515,GO:0005575,GO:0005622,GO:0005623,GO:0005737,GO:0005829,GO:0005975,GO:0005996,GO:0006014,GO:0006810,GO:0008150,GO:0008152,GO:0008643,GO:0009056,GO:0015144,GO:0015145,GO:0015146,GO:0015399,GO:0015405,GO:0015407,GO:0015591,GO:0015608,GO:0015611,GO:0015749,GO:0015750,GO:0015752,GO:0016052,GO:0016462,GO:0016787,GO:0016817,GO:0016818,GO:0016853,GO:…	5.4.99.62	ko:K06726	ko02010,map02010		R08247	RC02247	ko00000,ko00001,ko01000			iAF1260.b3748,iBWG_1329.BWG_3439,iECDH10B_1368.ECDH10B_3936,iECDH1ME8569_1439.ECDH1ME8569_3636,iECH74115_1262.ECH74115_5184,iECSP_1301.ECSP_4798,iECs_1301.ECs4690,iETEC_1333.ETEC_4039,iEcDH1_1363.EcDH1_4219,iJO1366.b3748,iJR904.b3748,iY75_1357.Y75_RS18330	Bacteria	1VA2V@1239,24MPJ@186801,36IY3@31979,COG1869@1,COG1869@2	NA|NA|NA	G	Catalyzes the interconversion of beta-pyran and beta- furan forms of D-ribose	PANTHER, SUPERFAMILY, Gene3D, Hamap, Pfam	PTHR37831, SSF102546, G3DSA:3.40.1650.10, MF_01661, PF05025	D-ribose pyranase [rbsD]., RbsD / FucU transport protein family	IPR023064, IPR023750, IPR023750, IPR023064, IPR007721	D-ribose pyranase, RbsD-like superfamily, RbsD-like superfamily, D-ribose pyranase, D-ribose pyranase RbsD/L-fucose mutarotase FucU	GO:0016872, GO:0005996, GO:0016853, GO:0048029, GO:0005996, GO:0016853, GO:0048029, GO:0016872, GO:0005996, GO:0016853, GO:0048029	Reactome: R-HSA-6787639, Reactome: R-HSA-6787639, Reactome: R-HSA-6787639
NC_008261.1_142_278	195103.CPF_1884	4.6e-166	590.5	Clostridiaceae	rbsK		2.7.1.15	ko:K00852	ko00030,map00030		R01051,R02750	RC00002,RC00017	ko00000,ko00001,ko01000				Bacteria	1TQRC@1239,249QQ@186801,36G1Q@31979,COG0524@1,COG0524@2	NA|NA|NA	H	Catalyzes the phosphorylation of ribose at O-5 in a reaction requiring ATP and magnesium. The resulting D-ribose-5- phosphate can then be used either for sythesis of nucleotides, histidine, and tryptophan, or as a component of the pentose phosphate pathway	PANTHER, Hamap, ProSitePatterns, TIGRFAM, SUPERFAMILY, PRINTS, PRINTS, PRINTS, PRINTS, PRINTS, Gene3D, CDD, Pfam, PANTHER	PTHR10584:SF166, MF_01987, PS00584, TIGR02152, SSF53613, PR00990, PR00990, PR00990, PR00990, PR00990, G3DSA:3.40.1190.20, cd01174, PF00294, PTHR10584	Ribokinase [rbsK]., pfkB family of carbohydrate kinases signature 2., D_ribokin_bact: ribokinase, Ribokinase signature, Ribokinase signature, Ribokinase signature, Ribokinase signature, Ribokinase signature, ribokinase, pfkB family carbohydrate kinase	IPR011877, IPR002173, IPR011877, IPR029056, IPR002139, IPR002139, IPR002139, IPR002139, IPR002139, IPR029056, IPR011877, IPR011611	Ribokinase, Carbohydrate/puine kinase, PfkB, conserved site, Ribokinase, Ribokinase-like, Ribokinase/fructokinase, Ribokinase/fructokinase, Ribokinase/fructokinase, Ribokinase/fructokinase, Ribokinase/fructokinase, Ribokinase-like, Ribokinase, Carbohydrate kinase PfkB	GO:0004747, GO:0006014, GO:0016773, GO:0004747, GO:0006014, GO:0016301, GO:0016301, GO:0016301, GO:0016301, GO:0016301, GO:0004747, GO:0006014	KEGG: 00030+2.7.1.15|Reactome: R-HSA-71336, KEGG: 00030+2.7.1.15|Reactome: R-HSA-71336, Reactome: R-HSA-71336, Reactome: R-HSA-71336, Reactome: R-HSA-71336, Reactome: R-HSA-71336, Reactome: R-HSA-71336, KEGG: 00030+2.7.1.15|Reactome: R-HSA-71336
NC_008261.1_142_279	195103.CPF_1885	1.9e-80	305.1	Clostridiaceae	def	GO:0003674,GO:0003824,GO:0006464,GO:0006807,GO:0008150,GO:0008152,GO:0009987,GO:0016787,GO:0016810,GO:0016811,GO:0018193,GO:0018206,GO:0019538,GO:0031365,GO:0036211,GO:0042586,GO:0043170,GO:0043412,GO:0043686,GO:0044237,GO:0044238,GO:0044260,GO:0044267,GO:0071704,GO:1901564	3.5.1.88	ko:K01462					ko00000,ko01000				Bacteria	1V6S3@1239,24HBJ@186801,36J90@31979,COG0242@1,COG0242@2	NA|NA|NA	J	Removes the formyl group from the N-terminal Met of newly synthesized proteins. Requires at least a dipeptide for an efficient rate of reaction. N-terminal L-methionine is a prerequisite for activity but the enzyme has broad specificity at other positions	Coils, PANTHER, PRINTS, PRINTS, PRINTS, PRINTS, SUPERFAMILY, Pfam, Gene3D, PIRSF, Hamap, PANTHER, CDD, TIGRFAM	Coil, PTHR10458:SF13, PR01576, PR01576, PR01576, PR01576, SSF56420, PF01327, G3DSA:3.90.45.10, PIRSF004749, MF_00163, PTHR10458, cd00487, TIGR00079	Peptide deformylase signature, Peptide deformylase signature, Peptide deformylase signature, Peptide deformylase signature, Polypeptide deformylase, Peptide deformylase [def]., Pep_deformylase, pept_deformyl: peptide deformylase	IPR023635, IPR023635, IPR023635, IPR023635, IPR036821, IPR023635, IPR036821, IPR023635, IPR023635, IPR023635, IPR023635, IPR023635	Peptide deformylase, Peptide deformylase, Peptide deformylase, Peptide deformylase, Peptide deformylase superfamily, Peptide deformylase, Peptide deformylase superfamily, Peptide deformylase, Peptide deformylase, Peptide deformylase, Peptide deformylase, Peptide deformylase
NC_008261.1_142_280	195103.CPF_1886	4.1e-170	604	Clostridiaceae	wecA	GO:0000287,GO:0003674,GO:0003824,GO:0005488,GO:0005575,GO:0005623,GO:0005886,GO:0008150,GO:0008152,GO:0009058,GO:0009059,GO:0009987,GO:0016020,GO:0016043,GO:0016740,GO:0016772,GO:0016780,GO:0030145,GO:0034645,GO:0042546,GO:0043167,GO:0043169,GO:0043170,GO:0044036,GO:0044038,GO:0044085,GO:0044237,GO:0044249,GO:0044260,GO:0044464,GO:0045229,GO:0046872,GO:0046914,GO:0070589,GO:0071554,GO:0071555,GO:…	2.7.8.33,2.7.8.35	ko:K02851			R08856	RC00002	ko00000,ko01000,ko01003,ko01005				Bacteria	1TP9V@1239,247M7@186801,36F6R@31979,COG0472@1,COG0472@2	NA|NA|NA	M	PFAM Glycosyl transferase family 4	PANTHER, PANTHER, CDD, Pfam	PTHR22926:SF3, PTHR22926, cd06853, PF00953	GT_WecA_like, Glycosyl transferase family 4	IPR000715, IPR000715	Glycosyl transferase, family 4, Glycosyl transferase, family 4	GO:0008963, GO:0016021, GO:0008963, GO:0016021	KEGG: 00550+2.7.8.13|MetaCyc: PWY-5265|MetaCyc: PWY-6470|MetaCyc: PWY-6471|Reactome: R-HSA-446193|Reactome: R-HSA-4549356, KEGG: 00550+2.7.8.13|MetaCyc: PWY-5265|MetaCyc: PWY-6470|MetaCyc: PWY-6471|Reactome: R-HSA-446193|Reactome: R-HSA-4549356
NC_008261.1_142_281	195103.CPF_1887	2.5e-98	364.8	Firmicutes													Bacteria	1UIS3@1239,COG4189@1,COG4189@2	NA|NA|NA	K	Helix-turn-helix domain	CDD, Coils, Pfam, SUPERFAMILY, SMART, PANTHER, Gene3D	cd00090, Coil, PF12840, SSF46785, SM00418, PTHR38600, G3DSA:1.10.10.10	HTH_ARSR, Helix-turn-helix domain	IPR011991, IPR036390, IPR001845, IPR036388	ArsR-like helix-turn-helix domain, Winged helix DNA-binding domain superfamily, HTH ArsR-type DNA-binding domain, Winged helix-like DNA-binding domain superfamily	GO:0003700, GO:0006355
NC_008261.1_142_282	195103.CPF_1888	4.2e-110	404.1	Clostridiaceae	atpD			ko:K02120	ko00190,ko01100,map00190,map01100	M00159			ko00000,ko00001,ko00002	3.A.2.2,3.A.2.3			Bacteria	1TQ1Y@1239,247TC@186801,36E0U@31979,COG1394@1,COG1394@2	NA|NA|NA	C	Produces ATP from ADP in the presence of a proton gradient across the membrane	PANTHER, Pfam, TIGRFAM, Hamap	PTHR11671, PF01813, TIGR00309, MF_00271	ATP synthase subunit D, V_ATPase_subD: V-type ATPase, D subunit, V-type ATP synthase subunit D [atpD].	IPR002699, IPR002699, IPR002699, IPR002699	ATPase, V1 complex, subunit D, ATPase, V1 complex, subunit D, ATPase, V1 complex, subunit D, ATPase, V1 complex, subunit D	GO:0042626, GO:0042626, GO:0042626, GO:0042626	Reactome: R-HSA-1222556|Reactome: R-HSA-6798695|Reactome: R-HSA-77387|Reactome: R-HSA-917977|Reactome: R-HSA-983712, Reactome: R-HSA-1222556|Reactome: R-HSA-6798695|Reactome: R-HSA-77387|Reactome: R-HSA-917977|Reactome: R-HSA-983712, Reactome: R-HSA-1222556|Reactome: R-HSA-6798695|Reactome: R-HSA-77387|Reactome: R-HSA-917977|Reactome: R-HSA-983712, Reactome: R-HSA-1222556|Reactome: R-HSA-6798695|…
NC_008261.1_142_283	195103.CPF_1889	4e-259	900.2	Clostridiaceae	ntpB			ko:K02118	ko00190,ko01100,map00190,map01100	M00159			ko00000,ko00001,ko00002	3.A.2.2,3.A.2.3			Bacteria	1VSU1@1239,2496H@186801,36DRP@31979,COG1156@1,COG1156@2	NA|NA|NA	C	Produces ATP from ADP in the presence of a proton gradient across the membrane. The V-type beta chain is a regulatory subunit	Gene3D, Pfam, PANTHER, Hamap, PIRSF, SUPERFAMILY, SUPERFAMILY, Pfam, PANTHER, ProSitePatterns, CDD	G3DSA:3.40.50.12240, PF00006, PTHR43389:SF4, MF_00310, PIRSF039114, SSF52540, SSF47917, PF02874, PTHR43389, PS00152, cd01135	ATP synthase alpha/beta family, nucleotide-binding domain, V-type ATP synthase beta chain [atpB]., ATP synthase alpha/beta family, beta-barrel domain, ATP synthase alpha and beta subunits signature., V_A-ATPase_B	IPR000194, IPR022879, IPR022879, IPR027417, IPR004100, IPR022879, IPR020003	ATPase, F1/V1/A1 complex, alpha/beta subunit, nucleotide-binding domain, V-type ATP synthase regulatory subunit B/beta, V-type ATP synthase regulatory subunit B/beta, P-loop containing nucleoside triphosphate hydrolase, ATPase, F1/V1/A1 complex, alpha/beta subunit, N-terminal domain, V-type ATP synthase regulatory subunit B/beta, ATPase, alpha/beta subunit, nucleotide-binding domain, active site	GO:0005524, GO:0046034, GO:1902600, GO:0005524	KEGG: 00190+3.6.3.14|KEGG: 00195+3.6.3.14|MetaCyc: PWY-7980, Reactome: R-HSA-1222556|Reactome: R-HSA-77387|Reactome: R-HSA-917977|Reactome: R-HSA-983712, Reactome: R-HSA-1222556|Reactome: R-HSA-77387|Reactome: R-HSA-917977|Reactome: R-HSA-983712, KEGG: 00190+3.6.3.14|KEGG: 00195+3.6.3.14|MetaCyc: PWY-7980, Reactome: R-HSA-1222556|Reactome: R-HSA-77387|Reactome: R-HSA-917977|Reactome: R-HSA-983712…
NC_008261.1_142_284	195103.CPF_1890	0	1145.2	Clostridiaceae	atpA	GO:0003674,GO:0003824,GO:0005215,GO:0005575,GO:0005623,GO:0005886,GO:0006810,GO:0006811,GO:0006812,GO:0008150,GO:0008324,GO:0015075,GO:0015077,GO:0015078,GO:0015318,GO:0015399,GO:0015405,GO:0015672,GO:0016020,GO:0016462,GO:0016787,GO:0016817,GO:0016818,GO:0016887,GO:0017111,GO:0019829,GO:0022804,GO:0022853,GO:0022857,GO:0022890,GO:0034220,GO:0036442,GO:0042623,GO:0042625,GO:0042626,GO:0043492,GO:…	3.6.3.14,3.6.3.15	ko:K02117	ko00190,ko01100,map00190,map01100	M00159			ko00000,ko00001,ko00002,ko01000	3.A.2.2,3.A.2.3			Bacteria	1TPGS@1239,24882@186801,36DW7@31979,COG1155@1,COG1155@2	NA|NA|NA	C	Produces ATP from ADP in the presence of a proton gradient across the membrane. The V-type alpha chain is a catalytic subunit	Gene3D, ProSitePatterns, Gene3D, Gene3D, Coils, Hamap, SUPERFAMILY, Gene3D, CDD, PANTHER, SUPERFAMILY, Pfam, Pfam, Pfam, PANTHER, SUPERFAMILY	G3DSA:2.40.50.100, PS00152, G3DSA:2.40.30.20, G3DSA:1.10.1140.10, Coil, MF_00309, SSF52540, G3DSA:3.40.50.300, cd01134, PTHR43607, SSF50615, PF16886, PF00006, PF02874, PTHR43607:SF1, SSF47917	ATP synthase alpha and beta subunits signature., V-type ATP synthase alpha chain [atpA]., V_A-ATPase_A, ATPsynthase alpha/beta subunit N-term extension, ATP synthase alpha/beta family, nucleotide-binding domain, ATP synthase alpha/beta family, beta-barrel domain	IPR020003, IPR023366, IPR024034, IPR022878, IPR027417, IPR022878, IPR036121, IPR031686, IPR000194, IPR004100	ATPase, alpha/beta subunit, nucleotide-binding domain, active site, ATP synthase subunit alpha, N-terminal domain-like superfamily, ATPase, F1/V1 complex, beta/alpha subunit, C-terminal, V-type ATP synthase catalytic alpha chain, P-loop containing nucleoside triphosphate hydrolase, V-type ATP synthase catalytic alpha chain, ATPase, F1/V1/A1 complex, alpha/beta subunit, N-terminal domain superfami…	GO:0005524, GO:0046034, GO:0046034, GO:0046034, GO:1902600, GO:0005524, GO:0046034, GO:1902600	KEGG: 00190+3.6.3.14|KEGG: 00195+3.6.3.14|MetaCyc: PWY-7980, KEGG: 00190+3.6.3.14|KEGG: 00195+3.6.3.14|MetaCyc: PWY-7980, KEGG: 00190+3.6.3.14|KEGG: 00195+3.6.3.14|MetaCyc: PWY-7980, KEGG: 00190+3.6.3.14|KEGG: 00195+3.6.3.14|MetaCyc: PWY-7980|Reactome: R-HSA-1222556|Reactome: R-HSA-77387|Reactome: R-HSA-917977|Reactome: R-HSA-983712, KEGG: 00190+3.6.3.14|KEGG: 00195+3.6.3.14|MetaCyc: PWY-7980|Rea…
NC_008261.1_142_285	195103.CPF_1891	1.2e-49	202.2	Clostridiaceae	ntpG			ko:K02122	ko00190,ko01100,map00190,map01100	M00159			ko00000,ko00001,ko00002	3.A.2.2,3.A.2.3			Bacteria	1VAX7@1239,24MXC@186801,36JRX@31979,COG1436@1,COG1436@2	NA|NA|NA	C	Produces ATP from ADP in the presence of a proton gradient across the membrane	SUPERFAMILY, Pfam, Gene3D, Hamap	SSF159468, PF01990, G3DSA:3.40.50.10580, MF_00312	ATP synthase (F/14-kDa) subunit, V-type ATP synthase subunit F [atpF].	IPR036906, IPR008218, IPR036906, IPR022944	ATPase, V1 complex, subunit F superfamily, ATPase, V1 complex, subunit F, ATPase, V1 complex, subunit F superfamily, ATPase, V1 complex, subunit F, bacterial/archaeal	GO:0034220, GO:0034220, GO:0034220	Reactome: R-HSA-1222556|Reactome: R-HSA-77387|Reactome: R-HSA-917977|Reactome: R-HSA-983712, Reactome: R-HSA-1222556|Reactome: R-HSA-77387|Reactome: R-HSA-917977|Reactome: R-HSA-983712, Reactome: R-HSA-1222556|Reactome: R-HSA-77387|Reactome: R-HSA-917977|Reactome: R-HSA-983712
NC_008261.1_142_286	195103.CPF_1892	7.3e-178	629.8	Clostridiaceae	ntpC			ko:K02119	ko00190,ko01100,map00190,map01100	M00159			ko00000,ko00001,ko00002	3.A.2.2,3.A.2.3			Bacteria	1U6WZ@1239,249XD@186801,36DZ2@31979,COG1527@1,COG1527@2	NA|NA|NA	C	C subunit	Gene3D, PANTHER, Gene3D, Pfam, SUPERFAMILY, Gene3D	G3DSA:1.20.1690.10, PTHR38682, G3DSA:1.20.1690.10, PF01992, SSF103486, G3DSA:1.10.132.50	ATP synthase (C/AC39) subunit	IPR035067, IPR035067, IPR002843, IPR036079	V-type ATPase subunit c, V-type ATPase subunit c, ATPase, V0 complex, c/d subunit, V-type ATP synthase subunit C-like		Reactome: R-HSA-1222556|Reactome: R-HSA-77387|Reactome: R-HSA-917977|Reactome: R-HSA-983712, Reactome: R-HSA-1222556|Reactome: R-HSA-77387|Reactome: R-HSA-917977|Reactome: R-HSA-983712, Reactome: R-HSA-1222556|Reactome: R-HSA-77387|Reactome: R-HSA-917977|Reactome: R-HSA-983712, Reactome: R-HSA-1222556|Reactome: R-HSA-77387|Reactome: R-HSA-917977|Reactome: R-HSA-983712
NC_008261.1_142_287	195103.CPF_1893	5.4e-80	303.9	Clostridiaceae	atpE			ko:K02121	ko00190,ko01100,map00190,map01100	M00159			ko00000,ko00001,ko00002	3.A.2.2,3.A.2.3			Bacteria	1VEEA@1239,24QMH@186801,36J88@31979,COG1390@1,COG1390@2	NA|NA|NA	C	Produces ATP from ADP in the presence of a proton gradient across the membrane	Gene3D, Pfam, SUPERFAMILY, Coils, Hamap	G3DSA:1.20.5.620, PF01991, SSF160527, Coil, MF_00311	ATP synthase (E/31 kDa) subunit, V-type proton ATPase subunit E [atpE].	IPR002842, IPR002842	V-type ATPase subunit E, V-type ATPase subunit E	GO:0015991, GO:0033178, GO:0046961, GO:0015991, GO:0033178, GO:0046961	Reactome: R-HSA-1222556|Reactome: R-HSA-77387|Reactome: R-HSA-917977|Reactome: R-HSA-983712, Reactome: R-HSA-1222556|Reactome: R-HSA-77387|Reactome: R-HSA-917977|Reactome: R-HSA-983712
NC_008261.1_142_288	195103.CPF_1894	8.2e-82	309.7	Clostridiaceae	atpE	GO:0003674,GO:0003824,GO:0005215,GO:0005488,GO:0005515,GO:0005575,GO:0005622,GO:0005623,GO:0006139,GO:0006163,GO:0006164,GO:0006725,GO:0006753,GO:0006754,GO:0006793,GO:0006796,GO:0006807,GO:0006810,GO:0006811,GO:0006812,GO:0008150,GO:0008152,GO:0008324,GO:0009058,GO:0009117,GO:0009123,GO:0009124,GO:0009126,GO:0009127,GO:0009141,GO:0009142,GO:0009144,GO:0009145,GO:0009150,GO:0009152,GO:0009156,GO:…		ko:K02110,ko:K02124	ko00190,ko00195,ko01100,map00190,map00195,map01100	M00157,M00159			ko00000,ko00001,ko00002,ko00194	3.A.2.1,3.A.2.2,3.A.2.3			Bacteria	1V786@1239,24HBF@186801,36I1J@31979,COG0636@1,COG0636@2	NA|NA|NA	C	Belongs to the V-ATPase proteolipid subunit family	Pfam, Pfam, PANTHER, PANTHER, SUPERFAMILY, Gene3D, SUPERFAMILY, PRINTS, PRINTS, PRINTS, PRINTS	PF00137, PF00137, PTHR10263:SF18, PTHR10263, SSF81333, G3DSA:1.20.120.610, SSF81333, PR00122, PR00122, PR00122, PR00122	ATP synthase subunit C, ATP synthase subunit C, Vacuolar ATP synthase 16kDa subunit signature, Vacuolar ATP synthase 16kDa subunit signature, Vacuolar ATP synthase 16kDa subunit signature, Vacuolar ATP synthase 16kDa subunit signature	IPR002379, IPR002379, IPR035921, IPR035921, IPR000245, IPR000245, IPR000245, IPR000245	V-ATPase proteolipid subunit C-like domain, V-ATPase proteolipid subunit C-like domain, F/V-ATP synthase subunit C superfamily, F/V-ATP synthase subunit C superfamily, V-ATPase proteolipid subunit, V-ATPase proteolipid subunit, V-ATPase proteolipid subunit, V-ATPase proteolipid subunit	GO:0015078, GO:0015991, GO:0033177, GO:0015078, GO:0015991, GO:0033177, GO:0015078, GO:0015991, GO:0033179, GO:0015078, GO:0015991, GO:0033179, GO:0015078, GO:0015991, GO:0033179, GO:0015078, GO:0015991, GO:0033179	Reactome: R-HSA-1222556|Reactome: R-HSA-77387|Reactome: R-HSA-917977|Reactome: R-HSA-983712, Reactome: R-HSA-1222556|Reactome: R-HSA-77387|Reactome: R-HSA-917977|Reactome: R-HSA-983712, Reactome: R-HSA-1222556|Reactome: R-HSA-77387|Reactome: R-HSA-917977|Reactome: R-HSA-983712, Reactome: R-HSA-1222556|Reactome: R-HSA-77387|Reactome: R-HSA-917977|Reactome: R-HSA-983712
NC_008261.1_142_289	195103.CPF_1895	0	1187.2	Clostridiaceae	ntpI	GO:0005575,GO:0005623,GO:0005886,GO:0016020,GO:0044464,GO:0071944		ko:K02123	ko00190,ko01100,map00190,map01100	M00159			ko00000,ko00001,ko00002	3.A.2.2,3.A.2.3			Bacteria	1TPTE@1239,249YV@186801,36EI6@31979,COG1269@1,COG1269@2	NA|NA|NA	U	Belongs to the V-ATPase 116 kDa subunit family	PANTHER, Coils, PANTHER, PANTHER, Coils, Pfam, Pfam, CDD, Coils, PANTHER	PTHR11629, Coil, PTHR11629:SF63, PTHR11629, Coil, PF01496, PF01496, cd06174, Coil, PTHR11629:SF63	V-type ATPase 116kDa subunit family, V-type ATPase 116kDa subunit family, MFS	IPR002490, IPR002490, IPR002490, IPR002490, IPR020846	V-type ATPase, V0 complex, 116kDa subunit family, V-type ATPase, V0 complex, 116kDa subunit family, V-type ATPase, V0 complex, 116kDa subunit family, V-type ATPase, V0 complex, 116kDa subunit family, Major facilitator superfamily domain	GO:0015078, GO:0015991, GO:0033179, GO:0015078, GO:0015991, GO:0033179, GO:0015078, GO:0015991, GO:0033179, GO:0015078, GO:0015991, GO:0033179	Reactome: R-HSA-1222556|Reactome: R-HSA-77387|Reactome: R-HSA-917977|Reactome: R-HSA-983712, Reactome: R-HSA-1222556|Reactome: R-HSA-77387|Reactome: R-HSA-917977|Reactome: R-HSA-983712, Reactome: R-HSA-1222556|Reactome: R-HSA-77387|Reactome: R-HSA-917977|Reactome: R-HSA-983712, Reactome: R-HSA-1222556|Reactome: R-HSA-77387|Reactome: R-HSA-917977|Reactome: R-HSA-983712
NC_008261.1_142_29	195103.CPF_1634	5.4e-175	620.2	Clostridiaceae													Bacteria	1VP7T@1239,24C6Q@186801,2ETWK@1,33MDT@2,36HFI@31979	NA|NA|NA			NA	NA	NA	NA	NA	NA	NA
NC_008261.1_142_290	195103.CPF_1896	2.4e-45	188	Clostridiaceae				ko:K02107	ko00190,map00190	M00159			ko00000,ko00001,ko00002	3.A.2.2,3.A.2.3			Bacteria	1VGAR@1239,24QX5@186801,36MNB@31979,COG2811@1,COG2811@2	NA|NA|NA			Coils, SUPERFAMILY	Coil, SSF81573		IPR028987	F-type ATP synthase subunit B-like, membrane domain superfamily
NC_008261.1_142_291	195103.CPF_1897	0	1095.1	Clostridiaceae			1.21.98.3	ko:K04034	ko00860,ko01100,ko01110,map00860,map01100,map01110		R06268,R06269,R06270	RC00741,RC01491,RC01492	ko00000,ko00001,ko01000				Bacteria	1TPGT@1239,247JS@186801,36DF6@31979,COG1032@1,COG1032@2	NA|NA|NA	C	Radical SAM	SUPERFAMILY, Gene3D, PANTHER, SUPERFAMILY, Pfam, CDD, ProSiteProfiles, SMART, CDD, Pfam, Pfam, SFLD, PANTHER, Gene3D, SFLD	SSF52242, G3DSA:3.80.30.20, PTHR43409, SSF102114, PF13311, cd01335, PS51332, SM00729, cd02068, PF04055, PF02310, SFLDG01123, PTHR43409:SF8, G3DSA:3.40.50.280, SFLDG01082	Protein of unknown function (DUF4080), Radical_SAM, B12-binding domain profile., radical_SAM_B12_BD, Radical SAM superfamily, B12 binding domain, methyltransferase (Class B), B12-binding domain containing	IPR036724, IPR023404, IPR025288, IPR006158, IPR006638, IPR007197, IPR006158, IPR034466	Cobalamin-binding domain superfamily, Radical SAM, alpha/beta horseshoe, Domain of unknown function DUF4080, Cobalamin (vitamin B12)-binding domain, Elp3/MiaB/NifB, Radical SAM, Cobalamin (vitamin B12)-binding domain, Methyltransferase, class B	GO:0031419, GO:0046872, GO:0031419, GO:0046872, GO:0003824, GO:0051536, GO:0003824, GO:0051536, GO:0031419, GO:0046872	Reactome: R-HSA-196741, Reactome: R-HSA-196741, Reactome: R-HSA-196741
NC_008261.1_142_292	195103.CPF_1898	7.6e-106	389.8	Clostridiaceae													Bacteria	1VX0N@1239,24F44@186801,2F7H6@1,33ZXT@2,36FY4@31979	NA|NA|NA			NA	NA	NA	NA	NA	NA	NA
NC_008261.1_142_293	195103.CPF_1899	1.9e-242	844.7	Clostridiaceae													Bacteria	1UIY2@1239,24AGC@186801,36DGB@31979,COG2133@1,COG2133@2	NA|NA|NA	G	pyrroloquinoline quinone binding	SUPERFAMILY, Pfam, Gene3D	SSF50952, PF07995, G3DSA:2.120.10.30	Glucose / Sorbosone dehydrogenase	IPR011041, IPR012938, IPR011042	Soluble quinoprotein glucose/sorbosone dehydrogenase, Glucose/Sorbosone dehydrogenase, Six-bladed beta-propeller, TolB-like	GO:0003824
NC_008261.1_142_294	195103.CPF_1900	5.2e-268	929.9	Clostridiaceae	spoVB			ko:K06409					ko00000,ko02000	2.A.66.2.14			Bacteria	1TNYX@1239,2485G@186801,36DMJ@31979,COG2244@1,COG2244@2	NA|NA|NA	S	Stage V sporulation protein B	PANTHER, PANTHER, Pfam, Pfam, TIGRFAM, PIRSF	PTHR43298:SF2, PTHR43298, PF14667, PF01943, TIGR02900, PIRSF038958	Polysaccharide biosynthesis C-terminal domain, Polysaccharide biosynthesis protein, spore_V_B: stage V sporulation protein B	IPR029303, IPR002797, IPR014249, IPR024923	Polysaccharide biosynthesis protein, C-terminal domain, Polysaccharide biosynthesis protein, Sporulation stage V protein B, Peptidoglycan biosynthesis protein, SpoVB-type	GO:0016020
NC_008261.1_142_295	NA	NA	NA	NA	NA	NA	NA	NA	NA	NA	NA	NA	NA	NA	NA	NA	NA	NA	NA	NA	NA	ProSiteProfiles	PS51257	Prokaryotic membrane lipoprotein lipid attachment site profile.
NC_008261.1_142_296	195103.CPF_1902	2e-152	545	Clostridiaceae	cvfB			ko:K00243					ko00000				Bacteria	1TQ1Z@1239,2498C@186801,36EB0@31979,COG2996@1,COG2996@2	NA|NA|NA	S	S1, RNA binding domain	ProSiteProfiles, PIRSF, PANTHER, Gene3D, Pfam, Pfam, Gene3D, SUPERFAMILY, SMART, SMART, SMART	PS50126, PIRSF012524, PTHR37296, G3DSA:1.10.10.10, PF13509, PF13509, G3DSA:2.40.50.140, SSF50249, SM00316, SM00316, SM00316	S1 domain profile., S1 domain, S1 domain	IPR003029, IPR014464, IPR014464, IPR036388, IPR039566, IPR039566, IPR012340, IPR022967, IPR022967, IPR022967	S1 domain, Conserved virulence factor B, Conserved virulence factor B, Winged helix-like DNA-binding domain superfamily, Conserved virulence factor B, S1 domain, Conserved virulence factor B, S1 domain, Nucleic acid-binding, OB-fold, RNA-binding domain, S1, RNA-binding domain, S1, RNA-binding domain, S1	GO:0003676
NC_008261.1_142_297	195103.CPF_1903	4.9e-82	310.5	Clostridiaceae	yrdA												Bacteria	1V6CZ@1239,24JAK@186801,36IWM@31979,COG0663@1,COG0663@2	NA|NA|NA	S	Bacterial transferase hexapeptide (six repeats)	CDD, Gene3D, Pfam, Pfam, SUPERFAMILY, PANTHER, PANTHER	cd04645, G3DSA:2.160.10.10, PF00132, PF00132, SSF51161, PTHR13061:SF0, PTHR13061	LbH_gamma_CA_like, Bacterial transferase hexapeptide (six repeats), Bacterial transferase hexapeptide (six repeats)	IPR001451, IPR001451, IPR011004	Hexapeptide repeat, Hexapeptide repeat, Trimeric LpxA-like superfamily
NC_008261.1_142_298	195103.CPF_1904	4.9e-190	670.2	Clostridiaceae													Bacteria	1W5H7@1239,24BI8@186801,36E18@31979,COG0613@1,COG0613@2	NA|NA|NA	S	PHP domain protein	SUPERFAMILY, PANTHER, PANTHER, SMART, Gene3D	SSF89550, PTHR42924:SF3, PTHR42924, SM00481, G3DSA:3.20.20.140		IPR016195, IPR003141	Polymerase/histidinol phosphatase-like, Polymerase/histidinol phosphatase, N-terminal	GO:0003824	Reactome: R-HSA-6784531|Reactome: R-HSA-6791226
NC_008261.1_142_299	195103.CPF_1905	6.4e-46	189.9	Clostridiaceae													Bacteria	1W2H8@1239,24NE3@186801,28YJX@1,2ZKDP@2,36N0U@31979	NA|NA|NA			NA	NA	NA	NA	NA	NA	NA
NC_008261.1_142_3	195103.CPF_1608	4.1e-116	424.1	Clostridiaceae				ko:K06400					ko00000				Bacteria	1UFD3@1239,24EHQ@186801,36HH2@31979,COG1961@1,COG1961@2	NA|NA|NA	L	Resolvase, N terminal domain	Pfam, Coils, Coils	PF13408, Coil, Coil	Recombinase zinc beta ribbon domain	IPR025827	Recombinase zinc beta ribbon domain
NC_008261.1_142_30	195103.CPF_1635	1.7e-167	595.1	Clostridiaceae	map	GO:0000096,GO:0003674,GO:0003824,GO:0004177,GO:0005488,GO:0005506,GO:0006082,GO:0006464,GO:0006508,GO:0006520,GO:0006555,GO:0006790,GO:0006807,GO:0008150,GO:0008152,GO:0008233,GO:0008235,GO:0008237,GO:0008238,GO:0009066,GO:0009987,GO:0010467,GO:0016151,GO:0016485,GO:0016787,GO:0019538,GO:0019752,GO:0030145,GO:0035551,GO:0036211,GO:0043167,GO:0043169,GO:0043170,GO:0043412,GO:0043436,GO:0044237,GO:…	3.4.11.18	ko:K01265					ko00000,ko01000,ko01002				Bacteria	1TQC1@1239,248I8@186801,36DNY@31979,COG0024@1,COG0024@2	NA|NA|NA	E	Methionine aminopeptidase	PRINTS, PRINTS, PRINTS, PRINTS, PANTHER, Hamap, TIGRFAM, Gene3D, SUPERFAMILY, SUPERFAMILY, PANTHER, Pfam, CDD, ProSitePatterns, Pfam, Gene3D	PR00599, PR00599, PR00599, PR00599, PTHR43330:SF8, MF_01974, TIGR00500, G3DSA:3.10.450.50, SSF103642, SSF55920, PTHR43330, PF00557, cd01086, PS00680, PF02810, G3DSA:3.90.230.10	Methionine aminopeptidase-1 signature, Methionine aminopeptidase-1 signature, Methionine aminopeptidase-1 signature, Methionine aminopeptidase-1 signature, Methionine aminopeptidase [map]., met_pdase_I: methionine aminopeptidase, type I, Metallopeptidase family M24, MetAP1, Methionine aminopeptidase subfamily 1 signature., SEC-C motif	IPR001714, IPR001714, IPR001714, IPR001714, IPR002467, IPR002467, IPR036005, IPR000994, IPR002467, IPR002467, IPR004027	Peptidase M24, methionine aminopeptidase, Peptidase M24, methionine aminopeptidase, Peptidase M24, methionine aminopeptidase, Peptidase M24, methionine aminopeptidase, Peptidase M24A, methionine aminopeptidase, subfamily 1, Peptidase M24A, methionine aminopeptidase, subfamily 1, Creatinase/aminopeptidase-like, Peptidase M24, Peptidase M24A, methionine aminopeptidase, subfamily 1, Peptidase M24A, …	GO:0004177, GO:0006508, GO:0008235, GO:0004177, GO:0006508, GO:0008235, GO:0004177, GO:0006508, GO:0008235, GO:0004177, GO:0006508, GO:0008235	MetaCyc: PWY-7799|MetaCyc: PWY-7800, MetaCyc: PWY-7799|MetaCyc: PWY-7800, MetaCyc: PWY-7799|MetaCyc: PWY-7800, MetaCyc: PWY-7799|MetaCyc: PWY-7800, MetaCyc: PWY-7799|MetaCyc: PWY-7800, MetaCyc: PWY-7799|MetaCyc: PWY-7800, MetaCyc: PWY-7799|MetaCyc: PWY-7800, MetaCyc: PWY-7799|MetaCyc: PWY-7800
NC_008261.1_142_300	195103.CPF_1906	4.3e-80	303.9	Clostridiaceae	asnC	GO:0001101,GO:0003674,GO:0003676,GO:0003677,GO:0003700,GO:0005488,GO:0006355,GO:0008150,GO:0009889,GO:0009890,GO:0009891,GO:0009892,GO:0009893,GO:0010033,GO:0010243,GO:0010468,GO:0010556,GO:0010557,GO:0010558,GO:0010604,GO:0010605,GO:0010628,GO:0010629,GO:0016597,GO:0019219,GO:0019222,GO:0031323,GO:0031324,GO:0031325,GO:0031326,GO:0031327,GO:0031328,GO:0031406,GO:0036094,GO:0042221,GO:0043167,GO:…		ko:K03718					ko00000,ko03000				Bacteria	1V2UC@1239,25DYA@186801,36I9Q@31979,COG1522@1,COG1522@2	NA|NA|NA	K	transcriptional regulator, AsnC family	SUPERFAMILY, ProSiteProfiles, SMART, CDD, Pfam, Gene3D, SUPERFAMILY, Pfam, PRINTS, PRINTS, PRINTS, Gene3D, PANTHER, PANTHER	SSF54909, PS50956, SM00344, cd00090, PF01037, G3DSA:3.30.70.920, SSF46785, PF13412, PR00033, PR00033, PR00033, G3DSA:1.10.10.10, PTHR43413, PTHR43413:SF3	AsnC-type HTH domain profile., HTH_ARSR, Lrp/AsnC ligand binding domain, Winged helix-turn-helix DNA-binding, AsnC bacterial regulatory protein HTH signature, AsnC bacterial regulatory protein HTH signature, AsnC bacterial regulatory protein HTH signature	IPR011008, IPR000485, IPR019888, IPR011991, IPR019887, IPR036390, IPR000485, IPR000485, IPR000485, IPR036388	Dimeric alpha-beta barrel, AsnC-type HTH domain, Transcription regulator AsnC-type, ArsR-like helix-turn-helix domain, Transcription regulator AsnC/Lrp, ligand binding domain, Winged helix DNA-binding domain superfamily, AsnC-type HTH domain, AsnC-type HTH domain, AsnC-type HTH domain, Winged helix-like DNA-binding domain superfamily	GO:0043565, GO:0003700, GO:0005622, GO:0006355, GO:0043565, GO:0043565, GO:0043565, GO:0043565
NC_008261.1_142_301	195103.CPF_1907	2.1e-28	131	Clostridiaceae	yuzA			ko:K09779					ko00000				Bacteria	1VEQJ@1239,24QKW@186801,36MUX@31979,COG2155@1,COG2155@2	NA|NA|NA	S	Domain of unknown function (DUF378)	PANTHER, Pfam	PTHR37304, PF04070	Domain of unknown function (DUF378)	IPR007211, IPR007211	Protein of unknown function DUF378, Protein of unknown function DUF378
NC_008261.1_142_302	195103.CPF_1908	0	1139	Clostridiaceae	oppD			ko:K02031,ko:K02032	ko02024,map02024	M00239			ko00000,ko00001,ko00002,ko02000	3.A.1.5			Bacteria	1TS8Q@1239,2496U@186801,36DTY@31979,COG0444@1,COG0444@2	NA|NA|NA	EP	Psort location Cytoplasmic, score	SUPERFAMILY	SSF53795
NC_008261.1_142_303	195103.CPF_1910	9e-153	546.2	Clostridiaceae	comEC			ko:K02238		M00429			ko00000,ko00002,ko02044	3.A.11.1,3.A.11.2			Bacteria	1TS9U@1239,249VR@186801,36DFY@31979,COG2333@1,COG2333@2	NA|NA|NA	L	domain protein	Pfam, SMART, PANTHER, CDD, Gene3D, PANTHER, SUPERFAMILY	PF00753, SM00849, PTHR30619, cd07731, G3DSA:3.60.15.10, PTHR30619:SF1, SSF56281	Metallo-beta-lactamase superfamily, ComA-like_MBL-fold	IPR001279, IPR001279, IPR035681, IPR036866, IPR036866	Metallo-beta-lactamase, Metallo-beta-lactamase, ComA-like, MBL domain, Ribonuclease Z/Hydroxyacylglutathione hydrolase-like, Ribonuclease Z/Hydroxyacylglutathione hydrolase-like
NC_008261.1_142_304	195103.CPF_1911	1.4e-124	452.2	Clostridiaceae				ko:K07502					ko00000				Bacteria	1V4B5@1239,24FU0@186801,36I2C@31979,COG3359@1,COG3359@2	NA|NA|NA	L	RNase_H superfamily	Pfam, Gene3D, SUPERFAMILY	PF13482, G3DSA:3.30.420.10, SSF53098	RNase_H superfamily	IPR038720, IPR036397, IPR012337	YprB, ribonuclease H-like domain, Ribonuclease H superfamily, Ribonuclease H-like superfamily	GO:0003676
NC_008261.1_142_305	195103.CPF_1912	3.1e-33	147.1	Clostridiaceae	feoA			ko:K04758					ko00000,ko02000				Bacteria	1VEHC@1239,24QKE@186801,36MTC@31979,COG1918@1,COG1918@2	NA|NA|NA	P	ferrous iron transport protein	SMART, Gene3D, PANTHER, Pfam, SUPERFAMILY	SM00899, G3DSA:2.30.30.90, PTHR42954, PF04023, SSF50037	FeoA domain	IPR007167, IPR038157, IPR007167, IPR008988	Ferrous iron transporter FeoA domain, Ferrous iron transporter, core domain, Ferrous iron transporter FeoA domain, Transcriptional repressor, C-terminal	GO:0046914, GO:0046914
NC_008261.1_142_306	195103.CPF_1913	0	1120.1	Clostridiaceae	feoB			ko:K04759					ko00000,ko02000	9.A.8.1		iSB619.SA_RS13395	Bacteria	1TP7E@1239,24885@186801,36DF0@31979,COG0370@1,COG0370@2	NA|NA|NA	P	transporter of a GTP-driven Fe(2 ) uptake system	PANTHER, PANTHER, TIGRFAM, Gene3D, SUPERFAMILY, Pfam, CDD, PRINTS, PRINTS, Pfam, Pfam, ProSiteProfiles, Pfam	PTHR43185, PTHR43185, TIGR00437, G3DSA:3.40.50.300, SSF52540, PF02421, cd01879, PR00326, PR00326, PF07670, PF07670, PS51711, PF07664	feoB: ferrous iron transport protein B, Ferrous iron transport protein B, FeoB, GTP1/OBG GTP-binding protein family signature, GTP1/OBG GTP-binding protein family signature, Nucleoside recognition, Nucleoside recognition, FeoB-type guanine nucleotide-binding (G) domain profile., Ferrous iron transport protein B C terminus	IPR003373, IPR027417, IPR030389, IPR030389, IPR006073, IPR006073, IPR011642, IPR011642, IPR030389, IPR011640	Ferrous iron transport protein B, P-loop containing nucleoside triphosphate hydrolase, FeoB-type guanine nucleotide-binding (G) domain, FeoB-type guanine nucleotide-binding (G) domain, GTP binding domain, GTP binding domain, Nucleoside transporter/FeoB GTPase, Gate domain, Nucleoside transporter/FeoB GTPase, Gate domain, FeoB-type guanine nucleotide-binding (G) domain, Ferrous iron transport prot…	GO:0005525, GO:0015093, GO:0015684, GO:0016021, GO:0005525, GO:0005525, GO:0005525, GO:0005525, GO:0005525, GO:0015093, GO:0015684, GO:0016021	Reactome: R-HSA-83936, Reactome: R-HSA-83936
NC_008261.1_142_307	NA	NA	NA	NA	NA	NA	NA	NA	NA	NA	NA	NA	NA	NA	NA	NA	NA	NA	NA	NA	NA	Pfam, MobiDBLite	PF12669, mobidb-lite	Virus attachment protein p12 family, consensus disorder prediction
NC_008261.1_142_308	195103.CPF_1915	0	1101.3	Clostridiaceae	argS		6.1.1.19	ko:K01887	ko00970,map00970	M00359,M00360	R03646	RC00055,RC00523	ko00000,ko00001,ko00002,ko01000,ko01007,ko03016,ko03029				Bacteria	1TPEZ@1239,248JZ@186801,36DCT@31979,COG0018@1,COG0018@2	NA|NA|NA	J	Arginyl-tRNA synthetase	TIGRFAM, CDD, SUPERFAMILY, Pfam, ProSitePatterns, Gene3D, Pfam, Hamap, SMART, Coils, SUPERFAMILY, SUPERFAMILY, PRINTS, PRINTS, PRINTS, PRINTS, Gene3D, SMART, CDD, Gene3D, Pfam, PANTHER	TIGR00456, cd07956, SSF47323, PF00750, PS00178, G3DSA:3.40.50.620, PF03485, MF_00123, SM01016, Coil, SSF55190, SSF52374, PR01038, PR01038, PR01038, PR01038, G3DSA:1.10.730.10, SM00836, cd00671, G3DSA:3.30.1360.70, PF05746, PTHR11956	argS: arginine--tRNA ligase, Anticodon_Ia_Arg, tRNA synthetases class I (R), Aminoacyl-transfer RNA synthetases class-I signature., Arginyl tRNA synthetase N terminal domain, Arginine--tRNA ligase [argS]., Arginyl-tRNA synthetase signature, Arginyl-tRNA synthetase signature, Arginyl-tRNA synthetase signature, Arginyl-tRNA synthetase signature, ArgRS_core, DALR anticodon binding domain	IPR001278, IPR009080, IPR035684, IPR001412, IPR014729, IPR005148, IPR001278, IPR005148, IPR036695, IPR001278, IPR001278, IPR001278, IPR001278, IPR008909, IPR035684, IPR036695, IPR008909, IPR001278	Arginine-tRNA ligase, Aminoacyl-tRNA synthetase, class Ia, anticodon-binding, Arginyl-tRNA synthetase, catalytic core domain, Aminoacyl-tRNA synthetase, class I, conserved site, Rossmann-like alpha/beta/alpha sandwich fold, Arginyl tRNA synthetase N-terminal domain, Arginine-tRNA ligase, Arginyl tRNA synthetase N-terminal domain, Arginyl tRNA synthetase N-terminal domain superfamily, Arginine-tRN…	GO:0004814, GO:0005524, GO:0006420, GO:0000166, GO:0004812, GO:0005524, GO:0006418, GO:0000166, GO:0004812, GO:0005524, GO:0006418, GO:0000166, GO:0004814, GO:0005524, GO:0005737, GO:0006420, GO:0004814, GO:0005524, GO:0006420, GO:0000166, GO:0004814, GO:0005524, GO:0005737, GO:0006420, GO:0000166, GO:0004814, GO:0005524, GO:0005737, GO:0006420, GO:0004814, GO:0005524, GO:0006420, GO:0004814, GO:…	KEGG: 00970+6.1.1.19, KEGG: 00970+6.1.1.19, KEGG: 00970+6.1.1.19|Reactome: R-HSA-2408517|Reactome: R-HSA-379716, KEGG: 00970+6.1.1.19, KEGG: 00970+6.1.1.19|Reactome: R-HSA-2408517|Reactome: R-HSA-379716, KEGG: 00970+6.1.1.19, KEGG: 00970+6.1.1.19, KEGG: 00970+6.1.1.19, KEGG: 00970+6.1.1.19, KEGG: 00970+6.1.1.19, KEGG: 00970+6.1.1.19, KEGG: 00970+6.1.1.19, KEGG: 00970+6.1.1.19
NC_008261.1_142_309	195103.CPF_1916	6.9e-289	999.2	Clostridiaceae	ppx		3.6.1.11,3.6.1.40	ko:K01524	ko00230,map00230		R03409	RC00002	ko00000,ko00001,ko01000				Bacteria	1TS3I@1239,248EW@186801,36FHQ@31979,COG0248@1,COG0248@2	NA|NA|NA	FP	Ppx GppA phosphatase	PANTHER, SUPERFAMILY, Gene3D, PANTHER, Gene3D, Gene3D, SUPERFAMILY, SUPERFAMILY, Pfam	PTHR30005, SSF53067, G3DSA:1.10.3210.10, PTHR30005:SF9, G3DSA:3.30.420.40, G3DSA:3.30.420.150, SSF109604, SSF53067, PF02541	Ppx/GppA phosphatase family	IPR003695	Ppx/GppA phosphatase		KEGG: 00230+3.6.1.40
NC_008261.1_142_310	195103.CPF_1917	2.8e-224	784.3	Clostridiaceae	capA			ko:K07282					ko00000				Bacteria	1UZW4@1239,24950@186801,36WWA@31979,COG2843@1,COG2843@2	NA|NA|NA	M	Bacterial capsule synthesis protein PGA_cap	Gene3D, SMART, CDD, SUPERFAMILY, Coils, PANTHER, PANTHER, Pfam	G3DSA:3.60.21.10, SM00854, cd07381, SSF56300, Coil, PTHR33393, PTHR33393:SF10, PF09587	MPP_CapA, Bacterial capsule synthesis protein PGA_cap	IPR029052, IPR019079, IPR019079, IPR019079	Metallo-dependent phosphatase-like, Capsule synthesis protein, CapA, Capsule synthesis protein, CapA, Capsule synthesis protein, CapA
NC_008261.1_142_311	195103.CPF_1918	1.7e-105	388.7	Clostridiaceae	MA20_27160			ko:K06402					ko00000,ko01000,ko01002				Bacteria	1V6D4@1239,24K0D@186801,36HB5@31979,COG1994@1,COG1994@2	NA|NA|NA	S	peptidase	CDD, PANTHER	cd06158, PTHR35864	S2P-M50_like_1
NC_008261.1_142_312	195103.CPF_1919	1.6e-260	904.8	Clostridiaceae	phoH			ko:K07175					ko00000				Bacteria	1UHTD@1239,25ED1@186801,36EGB@31979,COG1875@1,COG1875@2	NA|NA|NA	T	PFAM PhoH family protein	SMART, SUPERFAMILY, Pfam, CDD, PANTHER, Gene3D, Pfam, Gene3D, PANTHER, CDD	SM00670, SSF52540, PF02562, cd00046, PTHR30473, G3DSA:3.40.50.300, PF13638, G3DSA:3.40.50.1010, PTHR30473:SF2, cd09883	PhoH-like protein, DEXDc, PIN domain, PIN_PhoHL-ATPase	IPR002716, IPR027417, IPR003714, IPR002716	PIN domain, P-loop containing nucleoside triphosphate hydrolase, PhoH-like protein, PIN domain	GO:0005524
NC_008261.1_142_313	195103.CPF_1920	4.9e-116	423.7	Clostridiaceae			2.7.7.7	ko:K02342	ko00230,ko00240,ko01100,ko03030,ko03430,ko03440,map00230,map00240,map01100,map03030,map03430,map03440	M00260	R00375,R00376,R00377,R00378	RC02795	ko00000,ko00001,ko00002,ko01000,ko03032,ko03400				Bacteria	1VGWM@1239,249CJ@186801,36DPD@31979,COG0847@1,COG0847@2	NA|NA|NA	L	DNA polymerase III	SMART, Pfam, Gene3D, PANTHER, CDD, SUPERFAMILY	SM00479, PF00929, G3DSA:3.30.420.10, PTHR30231, cd06127, SSF53098	Exonuclease, DEDDh	IPR013520, IPR013520, IPR036397, IPR012337	Exonuclease, RNase T/DNA polymerase III, Exonuclease, RNase T/DNA polymerase III, Ribonuclease H superfamily, Ribonuclease H-like superfamily	GO:0003676
NC_008261.1_142_314	195103.CPF_1921	2.9e-51	207.6	Bacteria	ssb			ko:K03111	ko03030,ko03430,ko03440,map03030,map03430,map03440				ko00000,ko00001,ko03029,ko03032,ko03400				Bacteria	COG0629@1,COG0629@2	NA|NA|NA	L	single-stranded DNA binding	CDD, Gene3D, ProSiteProfiles, PIRSF, Pfam, TIGRFAM, SUPERFAMILY, PANTHER, PANTHER	cd04496, G3DSA:2.40.50.140, PS50935, PIRSF002070, PF00436, TIGR00621, SSF50249, PTHR10302, PTHR10302:SF0	SSB_OBF, Single-strand binding (SSB) domain profile., Single-strand binding protein family, ssb: single-stranded DNA-binding protein	IPR000424, IPR000424, IPR000424, IPR011344, IPR012340, IPR000424, IPR011344	Primosome PriB/single-strand DNA-binding, Primosome PriB/single-strand DNA-binding, Primosome PriB/single-strand DNA-binding, Single-stranded DNA-binding protein, Nucleic acid-binding, OB-fold, Primosome PriB/single-strand DNA-binding, Single-stranded DNA-binding protein	GO:0003697, GO:0003697, GO:0003697, GO:0003697, GO:0006260, GO:0003697, GO:0003697, GO:0006260	Reactome: R-HSA-2151201, Reactome: R-HSA-2151201, Reactome: R-HSA-2151201, Reactome: R-HSA-2151201, Reactome: R-HSA-2151201, Reactome: R-HSA-2151201
NC_008261.1_142_315	195103.CPF_1922	1.8e-262	911.4	Clostridiaceae	purB		4.3.2.2	ko:K01756	ko00230,ko00250,ko01100,ko01110,ko01130,map00230,map00250,map01100,map01110,map01130	M00048,M00049	R01083,R04559	RC00379,RC00444,RC00445	ko00000,ko00001,ko00002,ko01000				Bacteria	1TPMM@1239,2485N@186801,36DRK@31979,COG0015@1,COG0015@2	NA|NA|NA	F	Belongs to the lyase 1 family. Adenylosuccinate lyase subfamily	ProSitePatterns, Gene3D, SUPERFAMILY, Pfam, PANTHER, PRINTS, PRINTS, PRINTS, Gene3D, CDD, Pfam, SMART, Gene3D, TIGRFAM	PS00163, G3DSA:1.20.200.10, SSF48557, PF10397, PTHR43172, PR00149, PR00149, PR00149, G3DSA:1.10.275.60, cd03302, PF00206, SM00998, G3DSA:1.10.40.30, TIGR00928	Fumarate lyases signature., Adenylosuccinate lyase C-terminus, Fumarate lyase superfamily signature, Fumarate lyase superfamily signature, Fumarate lyase superfamily signature, Adenylsuccinate_lyase_2, Lyase, purB: adenylosuccinate lyase	IPR020557, IPR008948, IPR019468, IPR000362, IPR000362, IPR000362, IPR022761, IPR019468, IPR004769	Fumarate lyase, conserved site, L-Aspartase-like, Adenylosuccinate lyase C-terminal, Fumarate lyase family, Fumarate lyase family, Fumarate lyase family, Fumarate lyase, N-terminal, Adenylosuccinate lyase C-terminal, Adenylosuccinate lyase	GO:0003824, GO:0003824, GO:0004018, GO:0009152	KEGG: 00230+4.3.2.2|KEGG: 00250+4.3.2.2|MetaCyc: PWY-6123|MetaCyc: PWY-6124|MetaCyc: PWY-7219|MetaCyc: PWY-7234|Reactome: R-HSA-73817, KEGG: 00230+4.3.2.2|KEGG: 00250+4.3.2.2|MetaCyc: PWY-6123|MetaCyc: PWY-6124|MetaCyc: PWY-7219|MetaCyc: PWY-7234|Reactome: R-HSA-73817, KEGG: 00230+4.3.2.2|KEGG: 00250+4.3.2.2|MetaCyc: PWY-6123|MetaCyc: PWY-6124|MetaCyc: PWY-7219|MetaCyc: PWY-7234|Reactome: R-HSA-7…
NC_008261.1_142_316	195103.CPF_1923	2.1e-36	157.9	Clostridiaceae	ptsH			ko:K11189					ko00000,ko02000	4.A.2.1			Bacteria	1VA0R@1239,24QIP@186801,36KJQ@31979,COG1925@1,COG1925@2	NA|NA|NA	G	HPr family	TIGRFAM, ProSiteProfiles, PANTHER, ProSitePatterns, Pfam, ProSitePatterns, PRINTS, PRINTS, PRINTS, SUPERFAMILY, Gene3D, CDD	TIGR01003, PS51350, PTHR33705, PS00589, PF00381, PS00369, PR00107, PR00107, PR00107, SSF55594, G3DSA:3.30.1340.10, cd00367	PTS_HPr_family: phosphocarrier, HPr family, PTS HPR domain profile., PTS HPR domain serine phosphorylation site signature., PTS HPr component phosphorylation site, PTS HPR domain histidine phosphorylation site signature., Phosphocarrier protein signature, Phosphocarrier protein signature, Phosphocarrier protein signature, PTS-HPr_like	IPR000032, IPR000032, IPR002114, IPR000032, IPR001020, IPR000032, IPR000032, IPR000032, IPR035895, IPR035895, IPR000032	Phosphocarrier protein HPr-like, Phosphocarrier protein HPr-like, Phosphotransferase system, HPr serine phosphorylation site, Phosphocarrier protein HPr-like, Phosphotransferase system, HPr histidine phosphorylation site, Phosphocarrier protein HPr-like, Phosphocarrier protein HPr-like, Phosphocarrier protein HPr-like, HPr-like superfamily, HPr-like superfamily, Phosphocarrier protein HPr-like
NC_008261.1_142_317	195103.CPF_1924	7.5e-214	749.6	Clostridiaceae	aspB	GO:0003674,GO:0003824,GO:0008483,GO:0016740,GO:0016769,GO:0047297	2.6.1.1,2.6.1.14	ko:K00812,ko:K22457	ko00220,ko00250,ko00270,ko00330,ko00350,ko00360,ko00400,ko00401,ko00950,ko00960,ko01100,ko01110,ko01130,ko01210,ko01230,map00220,map00250,map00270,map00330,map00350,map00360,map00400,map00401,map00950,map00960,map01100,map01110,map01130,map01210,map01230		R00355,R00694,R00734,R00896,R01346,R02433,R02619,R05052	RC00006,RC00025	ko00000,ko00001,ko01000,ko01007			iHN637.CLJU_RS06550	Bacteria	1TP0J@1239,247NQ@186801,36DUZ@31979,COG0436@1,COG0436@2	NA|NA|NA	E	Aminotransferase	ProSitePatterns, CDD, PANTHER, SUPERFAMILY, Gene3D, PRINTS, PRINTS, PRINTS, PRINTS, PRINTS, Pfam, PANTHER, Gene3D	PS00105, cd00609, PTHR43795, SSF53383, G3DSA:3.90.1150.10, PR00753, PR00753, PR00753, PR00753, PR00753, PF00155, PTHR43795:SF2, G3DSA:3.40.640.10	Aminotransferases class-I pyridoxal-phosphate attachment site., AAT_like, 1-aminocyclopropane-1-carboxylate synthase signature, 1-aminocyclopropane-1-carboxylate synthase signature, 1-aminocyclopropane-1-carboxylate synthase signature, 1-aminocyclopropane-1-carboxylate synthase signature, 1-aminocyclopropane-1-carboxylate synthase signature, Aminotransferase class I and II	IPR004838, IPR015424, IPR015422, IPR004839, IPR015421	Aminotransferases, class-I, pyridoxal-phosphate-binding site, Pyridoxal phosphate-dependent transferase, Pyridoxal phosphate-dependent transferase domain 1, Aminotransferase, class I/classII, Pyridoxal phosphate-dependent transferase, major domain	GO:0003824, GO:0009058, GO:0030170, GO:0003824, GO:0009058, GO:0030170, GO:0003824
NC_008261.1_142_318	195103.CPF_1925	9.4e-37	159.1	Clostridiaceae	spoVS			ko:K06416					ko00000				Bacteria	1V6G8@1239,24MXY@186801,36KP7@31979,COG2359@1,COG2359@2	NA|NA|NA	S	Stage V sporulation protein S	PANTHER, Pfam, ProDom, Gene3D	PTHR35331, PF04232, PD061837, G3DSA:3.30.110.20	Stage V sporulation protein S (SpoVS), SPORULATION V STAGE S SPOVS-RELATED SPOVS CELL SEPTATION SPOVS3 RELATED	IPR007347, IPR007347, IPR007347, IPR036882	Sporulation stage V, protein S, Sporulation stage V, protein S, Sporulation stage V, protein S, Alba-like domain superfamily	GO:0003676
NC_008261.1_142_319	195103.CPF_1926	7.6e-243	846.3	Clostridiaceae	rny	GO:0003674,GO:0005488,GO:0005515,GO:0042802		ko:K18682	ko03018,map03018				ko00000,ko00001,ko01000,ko03019				Bacteria	1TP48@1239,248G8@186801,36DXD@31979,COG1418@1,COG1418@2	NA|NA|NA	S	Endoribonuclease that initiates mRNA decay	Pfam, SMART, TIGRFAM, TIGRFAM, PANTHER, PANTHER, Coils, ProSiteProfiles, Coils, CDD, Pfam, Gene3D, SMART, Gene3D, Coils, ProSiteProfiles, SUPERFAMILY, Coils, SUPERFAMILY, Hamap, Pfam	PF01966, SM00322, TIGR03319, TIGR00277, PTHR12826, PTHR12826:SF15, Coil, PS50084, Coil, cd00077, PF00013, G3DSA:3.30.1370.10, SM00471, G3DSA:1.10.3210.10, Coil, PS51831, SSF54791, Coil, SSF109604, MF_00335, PF12072	HD domain, RNase_Y: ribonuclease Y, HDIG: HDIG domain, Type-1 KH domain profile., HDc, KH domain, HD domain profile., Ribonuclease Y [rny]., Domain of unknown function (DUF3552)	IPR006674, IPR004087, IPR017705, IPR006675, IPR017705, IPR003607, IPR004088, IPR036612, IPR003607, IPR003607, IPR036612, IPR017705, IPR022711	HD domain, K Homology domain, Ribonuclease Y, HDIG domain, Ribonuclease Y, HD/PDEase domain, K Homology domain, type 1, K Homology domain, type 1 superfamily, HD/PDEase domain, HD/PDEase domain, K Homology domain, type 1 superfamily, Ribonuclease Y, Ribonuclease Y, N-terminal	GO:0003676, GO:0003723, GO:0006402, GO:0016020, GO:0003723, GO:0006402, GO:0016020, GO:0003723, GO:0003723, GO:0003723, GO:0003723, GO:0006402, GO:0016020
NC_008261.1_142_32	195103.CPF_1636	5.6e-109	400.2	Clostridia													Bacteria	1VP26@1239,24C1I@186801,2ESIJ@1,33K39@2	NA|NA|NA	S	Zinc dependent phospholipase C	Pfam	PF00882	Zinc dependent phospholipase C	IPR029002	Phospholipase C/D		Reactome: R-HSA-163125
NC_008261.1_142_320	195103.CPF_1927	9.4e-192	676	Clostridiaceae	recA	GO:0005575,GO:0005622,GO:0005623,GO:0005737,GO:0005829,GO:0006139,GO:0006259,GO:0006281,GO:0006725,GO:0006807,GO:0006950,GO:0006974,GO:0007154,GO:0008150,GO:0008152,GO:0009432,GO:0009605,GO:0009987,GO:0009991,GO:0031668,GO:0033554,GO:0034641,GO:0043170,GO:0044237,GO:0044238,GO:0044260,GO:0044424,GO:0044444,GO:0044464,GO:0046483,GO:0050896,GO:0051716,GO:0071496,GO:0071704,GO:0090304,GO:1901360		ko:K03553	ko03440,map03440	M00729			ko00000,ko00001,ko00002,ko03400				Bacteria	1TPD5@1239,247SF@186801,36DUE@31979,COG0468@1,COG0468@2	NA|NA|NA	L	Can catalyze the hydrolysis of ATP in the presence of single-stranded DNA, the ATP-dependent uptake of single-stranded DNA by duplex DNA, and the ATP-dependent hybridization of homologous single-stranded DNAs. It interacts with LexA causing its activation and leading to its autocatalytic cleavage	PRINTS, PRINTS, PRINTS, PRINTS, PRINTS, PRINTS, SMART, PANTHER, Gene3D, TIGRFAM, ProSitePatterns, SUPERFAMILY, PANTHER, ProSiteProfiles, ProSiteProfiles, Pfam, CDD, SUPERFAMILY, Hamap, Gene3D	PR00142, PR00142, PR00142, PR00142, PR00142, PR00142, SM00382, PTHR22942, G3DSA:3.30.250.10, TIGR02012, PS00321, SSF52540, PTHR22942:SF1, PS50162, PS50163, PF00154, cd00983, SSF54752, MF_00268, G3DSA:3.40.50.300	RecA protein signature, RecA protein signature, RecA protein signature, RecA protein signature, RecA protein signature, RecA protein signature, tigrfam_recA: protein RecA, recA signature., RecA family profile 1., RecA family profile 2., recA bacterial DNA recombination protein, recA, Protein RecA [recA].	IPR013765, IPR013765, IPR013765, IPR013765, IPR013765, IPR013765, IPR003593, IPR023400, IPR013765, IPR020584, IPR027417, IPR013765, IPR020588, IPR020587, IPR013765, IPR013765, IPR023400, IPR013765	DNA recombination and repair protein RecA, DNA recombination and repair protein RecA, DNA recombination and repair protein RecA, DNA recombination and repair protein RecA, DNA recombination and repair protein RecA, DNA recombination and repair protein RecA, AAA+ ATPase domain, DNA recombination and repair protein RecA, C-terminal, DNA recombination and repair protein RecA, DNA recombination/repai…	GO:0003697, GO:0005524, GO:0006281, GO:0003697, GO:0005524, GO:0006281, GO:0003697, GO:0005524, GO:0006281, GO:0003697, GO:0005524, GO:0006281, GO:0003697, GO:0005524, GO:0006281, GO:0003697, GO:0005524, GO:0006281, GO:0003697, GO:0005524, GO:0006281, GO:0003677, GO:0005524, GO:0006259, GO:0008094, GO:0003697, GO:0005524, GO:0006281, GO:0003677, GO:0005524, GO:0006281, GO:0008094, GO:0003677, GO:…	Reactome: R-HSA-5685942|Reactome: R-HSA-5693554|Reactome: R-HSA-5693568|Reactome: R-HSA-5693579
NC_008261.1_142_321	195103.CPF_1928	7.7e-95	353.2	Clostridiaceae	pgsA	GO:0006629,GO:0006644,GO:0006650,GO:0006793,GO:0006796,GO:0008150,GO:0008152,GO:0008610,GO:0008654,GO:0009058,GO:0009987,GO:0019637,GO:0044237,GO:0044238,GO:0044249,GO:0044255,GO:0045017,GO:0046474,GO:0046486,GO:0071704,GO:0090407,GO:1901576	2.7.8.41,2.7.8.5	ko:K00995,ko:K08744	ko00564,ko01100,map00564,map01100		R01801,R02030	RC00002,RC00017,RC02795	ko00000,ko00001,ko01000			iSB619.SA_RS06365	Bacteria	1V6PJ@1239,24J7Y@186801,36FYW@31979,COG0558@1,COG0558@2	NA|NA|NA	I	Belongs to the CDP-alcohol phosphatidyltransferase class-I family	TIGRFAM, ProSitePatterns, Pfam, Gene3D, PANTHER, PANTHER, PIRSF	TIGR00560, PS00379, PF01066, G3DSA:1.20.120.1760, PTHR14269, PTHR14269:SF24, PIRSF000847	pgsA: CDP-diacylglycerol--glycerol-3-phosphate 3-phosphatidyltransferase, CDP-alcohol phosphatidyltransferases signature., CDP-alcohol phosphatidyltransferase	IPR004570, IPR000462, IPR000462, IPR004570	CDP-diacylglycerol--glycerol-3-phosphate 3-phosphatidyltransferase, CDP-alcohol phosphatidyltransferase, CDP-alcohol phosphatidyltransferase, CDP-diacylglycerol--glycerol-3-phosphate 3-phosphatidyltransferase	GO:0008444, GO:0008654, GO:0016021, GO:0008654, GO:0016020, GO:0016780, GO:0008654, GO:0016020, GO:0016780, GO:0008444, GO:0008654, GO:0016021	KEGG: 00564+2.7.8.5|MetaCyc: PWY-5269|MetaCyc: PWY-5668|MetaCyc: PWY-7817, KEGG: 00564+2.7.8.5|MetaCyc: PWY-5269|MetaCyc: PWY-5668|MetaCyc: PWY-7817
NC_008261.1_142_322	195103.CPF_1929	1.7e-251	874.8	Clostridiaceae	rimO	GO:0003674,GO:0003824,GO:0005488,GO:0005575,GO:0005622,GO:0005623,GO:0005737,GO:0005829,GO:0006464,GO:0006807,GO:0008150,GO:0008152,GO:0009987,GO:0016740,GO:0016782,GO:0018193,GO:0018197,GO:0018198,GO:0018339,GO:0019538,GO:0035596,GO:0035599,GO:0036211,GO:0043170,GO:0043412,GO:0044237,GO:0044238,GO:0044260,GO:0044267,GO:0044424,GO:0044444,GO:0044464,GO:0048037,GO:0050497,GO:0051536,GO:0051539,GO:…	2.8.4.4	ko:K14441			R10652	RC00003,RC03217	ko00000,ko01000,ko03009				Bacteria	1TP2W@1239,2487D@186801,36E1K@31979,COG0621@1,COG0621@2	NA|NA|NA	J	Catalyzes the methylthiolation of an aspartic acid residue of ribosomal protein S12	SMART, PANTHER, Gene3D, Pfam, Gene3D, Hamap, Coils, TIGRFAM, SFLD, SUPERFAMILY, SFLD, TIGRFAM, SFLD, ProSitePatterns, ProSiteProfiles, CDD, Pfam, Gene3D	SM00729, PTHR43837, G3DSA:3.80.30.20, PF00919, G3DSA:3.40.50.12160, MF_01865, Coil, TIGR01125, SFLDF00274, SSF102114, SFLDG01082, TIGR00089, SFLDS00029, PS01278, PS51449, cd01335, PF04055, G3DSA:2.40.50.140	Uncharacterized protein family UPF0004, Ribosomal protein S12 methylthiotransferase RimO [rimO]., TIGR01125: ribosomal protein S12 methylthiotransferase RimO, ribosomal protein S12 methylthiotransferase (RimO-like), B12-binding domain containing, TIGR00089: radical SAM methylthiotransferase, MiaB/RimO family, Radical SAM, Methylthiotransferase radical SAM domain signature., Methylthiotransferase …	IPR006638, IPR005840, IPR023404, IPR013848, IPR038135, IPR005840, IPR005840, IPR005840, IPR005839, IPR007197, IPR020612, IPR013848, IPR007197	Elp3/MiaB/NifB, Ribosomal protein S12 methylthiotransferase RimO, Radical SAM, alpha/beta horseshoe, Methylthiotransferase, N-terminal, Methylthiotransferase, N-terminal domain superfamily, Ribosomal protein S12 methylthiotransferase RimO, Ribosomal protein S12 methylthiotransferase RimO, Ribosomal protein S12 methylthiotransferase RimO, Methylthiotransferase, Radical SAM, Methylthiotransferase, …	GO:0003824, GO:0051536, GO:0005737, GO:0016740, GO:0018339, GO:0051539, GO:0051539, GO:0005737, GO:0016740, GO:0018339, GO:0051539, GO:0005737, GO:0016740, GO:0018339, GO:0051539, GO:0005737, GO:0016740, GO:0018339, GO:0051539, GO:0006400, GO:0016740, GO:0051539, GO:0003824, GO:0051536, GO:0051539, GO:0051539, GO:0003824, GO:0051536
NC_008261.1_142_323	195103.CPF_1930	0	1476.8	Clostridiaceae	ftsK	GO:0000003,GO:0006355,GO:0008150,GO:0009889,GO:0010468,GO:0010556,GO:0019219,GO:0019222,GO:0019954,GO:0030436,GO:0031323,GO:0031326,GO:0032502,GO:0043934,GO:0050789,GO:0050794,GO:0051171,GO:0051252,GO:0060255,GO:0065007,GO:0080090,GO:1903506,GO:2000112,GO:2001141		ko:K03466					ko00000,ko03036	3.A.12			Bacteria	1TPJR@1239,247KM@186801,36DDP@31979,COG1674@1,COG1674@2	NA|NA|NA	D	Belongs to the FtsK SpoIIIE SftA family	Pfam, Pfam, Gene3D, PANTHER, SMART, ProSiteProfiles, SMART, Pfam, SUPERFAMILY, SUPERFAMILY, Gene3D, Gene3D, PANTHER	PF01580, PF01580, G3DSA:1.10.10.10, PTHR22683, SM00843, PS50901, SM00382, PF09397, SSF52540, SSF46785, G3DSA:3.40.50.300, G3DSA:3.30.980.40, PTHR22683:SF41	FtsK/SpoIIIE family, FtsK/SpoIIIE family, FtsK domain profile., Ftsk gamma domain	IPR002543, IPR002543, IPR036388, IPR018541, IPR002543, IPR003593, IPR018541, IPR027417, IPR036390	FtsK domain, FtsK domain, Winged helix-like DNA-binding domain superfamily, FtsK gamma domain, FtsK domain, AAA+ ATPase domain, FtsK gamma domain, P-loop containing nucleoside triphosphate hydrolase, Winged helix DNA-binding domain superfamily	GO:0000166, GO:0003677, GO:0005524, GO:0000166, GO:0003677, GO:0005524, GO:0000166, GO:0003677, GO:0005524
NC_008261.1_142_324	195103.CPF_1931	6.1e-120	436.8	Clostridiaceae	tepA		3.4.21.92	ko:K01358	ko04112,ko04212,map04112,map04212				ko00000,ko00001,ko01000,ko01002				Bacteria	1TPX2@1239,249QX@186801,36E2N@31979,COG0740@1,COG0740@2	NA|NA|NA	OU	Clp protease	PANTHER, SUPERFAMILY, Pfam, PANTHER, Gene3D	PTHR10381, SSF52096, PF00574, PTHR10381:SF11, G3DSA:3.90.226.10	Clp protease	IPR023562, IPR029045, IPR023562	Clp protease proteolytic subunit /Translocation-enhancing protein TepA, ClpP/crotonase-like domain superfamily, Clp protease proteolytic subunit /Translocation-enhancing protein TepA
NC_008261.1_142_325	195103.CPF_1932	2.6e-214	751.1	Clostridiaceae	dapG		1.1.1.3,2.7.2.4	ko:K00928,ko:K12524	ko00260,ko00261,ko00270,ko00300,ko01100,ko01110,ko01120,ko01130,ko01210,ko01230,map00260,map00261,map00270,map00300,map01100,map01110,map01120,map01130,map01210,map01230	M00016,M00017,M00018,M00033,M00525,M00526,M00527	R00480,R01773,R01775	RC00002,RC00043,RC00087	ko00000,ko00001,ko00002,ko01000				Bacteria	1TPQJ@1239,24811@186801,36EUA@31979,COG0527@1,COG0527@2	NA|NA|NA	E	Belongs to the aspartokinase family	Pfam, PANTHER, CDD, ProSiteProfiles, Gene3D, Gene3D, CDD, Gene3D, ProSitePatterns, SUPERFAMILY, TIGRFAM, Pfam, PANTHER, SUPERFAMILY, PIRSF, PIRSF, CDD	PF13840, PTHR21499, cd04914, PS51671, G3DSA:3.30.70.260, G3DSA:3.40.1160.10, cd04260, G3DSA:3.30.70.260, PS00324, SSF53633, TIGR00657, PF00696, PTHR21499:SF41, SSF55021, PIRSF000726, PIRSF000726, cd04937	ACT domain, ACT_AKi-DapG-BS_1, ACT domain profile., AAK_AKi-DapG-BS, Aspartokinase signature., asp_kinases: aspartate kinase, Amino acid kinase family, ACT_AKi-DapG-BS_2	IPR027795, IPR002912, IPR036393, IPR018042, IPR036393, IPR001341, IPR001048, IPR005260, IPR005260	CASTOR, ACT domain, ACT domain, Acetylglutamate kinase-like superfamily, Aspartate kinase, conserved site, Acetylglutamate kinase-like superfamily, Aspartate kinase, Aspartate/glutamate/uridylate kinase, Aspartate kinase, monofunctional class, Aspartate kinase, monofunctional class	GO:0004072, GO:0008652, GO:0004072, GO:0008652, GO:0004072, GO:0009089, GO:0004072, GO:0009089	KEGG: 00260+2.7.2.4|KEGG: 00261+2.7.2.4|KEGG: 00270+2.7.2.4|KEGG: 00300+2.7.2.4|MetaCyc: PWY-2941|MetaCyc: PWY-2942|MetaCyc: PWY-5097|MetaCyc: PWY-6160|MetaCyc: PWY-6559|MetaCyc: PWY-6562|MetaCyc: PWY-7153|MetaCyc: PWY-7977, KEGG: 00260+2.7.2.4|KEGG: 00261+2.7.2.4|KEGG: 00270+2.7.2.4|KEGG: 00300+2.7.2.4|MetaCyc: PWY-2941|MetaCyc: PWY-2942|MetaCyc: PWY-5097|MetaCyc: PWY-6160|MetaCyc: PWY-6559|Meta…
NC_008261.1_142_326	195103.CPF_1933	9.3e-43	179.1	Clostridiaceae	ymxH												Bacteria	1VEJW@1239,24RHH@186801,36KJT@31979,COG1873@1,COG1873@2	NA|NA|NA	S	Sporulation protein, YlmC YmxH	SUPERFAMILY, Pfam, PANTHER, PANTHER, TIGRFAM	SSF50346, PF05239, PTHR40061:SF1, PTHR40061, TIGR02888	PRC-barrel domain, spore_YlmC_YmxH: sporulation protein, YlmC/YmxH family	IPR011033, IPR027275, IPR014238, IPR014238	PRC-barrel-like superfamily, PRC-barrel domain, Sporulation protein YlmC/YmxH, Sporulation protein YlmC/YmxH
NC_008261.1_142_327	195103.CPF_1934	0	1328.5	Clostridiaceae	pnp	GO:0000166,GO:0000175,GO:0003674,GO:0003676,GO:0003723,GO:0003729,GO:0003824,GO:0004518,GO:0004527,GO:0004532,GO:0004540,GO:0004654,GO:0005488,GO:0005515,GO:0005575,GO:0005618,GO:0005622,GO:0005623,GO:0005737,GO:0005829,GO:0005886,GO:0006139,GO:0006401,GO:0006402,GO:0006725,GO:0006807,GO:0006950,GO:0008144,GO:0008150,GO:0008152,GO:0008408,GO:0009056,GO:0009057,GO:0009266,GO:0009408,GO:0009628,GO:…	2.7.7.8	ko:K00962	ko00230,ko00240,ko03018,map00230,map00240,map03018	M00394	R00437,R00438,R00439,R00440	RC02795	ko00000,ko00001,ko00002,ko01000,ko03016,ko03019				Bacteria	1TQDW@1239,248RW@186801,36DDN@31979,COG1185@1,COG1185@2	NA|NA|NA	J	Involved in mRNA degradation. Catalyzes the phosphorolysis of single-stranded polyribonucleotides processively in the 3- to 5-direction	Gene3D, CDD, ProSiteProfiles, SUPERFAMILY, SUPERFAMILY, Pfam, Pfam, Pfam, Pfam, SUPERFAMILY, SMART, SUPERFAMILY, TIGRFAM, PANTHER, PANTHER, SUPERFAMILY, CDD, ProSiteProfiles, PIRSF, Gene3D, CDD, Hamap, Gene3D, Gene3D, SUPERFAMILY, SUPERFAMILY, Coils, Pfam, CDD, SMART, Pfam	G3DSA:3.30.230.70, cd02393, PS50126, SSF46915, SSF54211, PF01138, PF01138, PF03725, PF03726, SSF54211, SM00322, SSF55666, TIGR03591, PTHR11252, PTHR11252:SF0, SSF50249, cd11363, PS50084, PIRSF005499, G3DSA:2.40.50.140, cd11364, MF_01595, G3DSA:3.30.1370.10, G3DSA:3.30.230.70, SSF55666, SSF54791, Coil, PF00013, cd04472, SM00316, PF00575	PNPase_KH, S1 domain profile., \3 exoribonuclease family, domain 1\", \"3 exoribonuclease family, domain 1\", \"3 exoribonuclease family, domain 2\", Polyribonucleotide nucleotidyltransferase, RNA binding domain, polynuc_phos: polyribonucleotide nucleotidyltransferase, RNase_PH_PNPase_1, Type-1 KH domain profile., RNase_PH_PNPase_2, Polyribonucleotide nucleotidyltransferase [pnp]., KH domain, S1_…	IPR027408, IPR003029, IPR036456, IPR020568, IPR001247, IPR001247, IPR015847, IPR015848, IPR020568, IPR004087, IPR036345, IPR012162, IPR012162, IPR012340, IPR012162, IPR012162, IPR036612, IPR027408, IPR036345, IPR036612, IPR004088, IPR022967, IPR003029	PNPase/RNase PH domain superfamily, S1 domain, Polyribonucleotide nucleotidyltransferase, RNA-binding domain superfamily, Ribosomal protein S5 domain 2-type fold, Exoribonuclease, phosphorolytic domain 1, Exoribonuclease, phosphorolytic domain 1, Exoribonuclease, phosphorolytic domain 2, Polyribonucleotide nucleotidyltransferase, RNA-binding domain, Ribosomal protein S5 domain 2-type fold, K Homo…	GO:0003676, GO:0003723, GO:0006396, GO:0003723, GO:0006396, GO:0003676, GO:0003723, GO:0004654, GO:0006402, GO:0003723, GO:0004654, GO:0006402, GO:0003723, GO:0004654, GO:0006402, GO:0003723, GO:0004654, GO:0006402, GO:0003723, GO:0003723, GO:0003723, GO:0003676	Reactome: R-HSA-380994|Reactome: R-HSA-429958|Reactome: R-HSA-450385|Reactome: R-HSA-450513|Reactome: R-HSA-450604|Reactome: R-HSA-6791226, KEGG: 00230+2.7.7.8|KEGG: 00240+2.7.7.8, Reactome: R-HSA-380994|Reactome: R-HSA-429958|Reactome: R-HSA-450385|Reactome: R-HSA-450513|Reactome: R-HSA-450604|Reactome: R-HSA-6791226, Reactome: R-HSA-380994|Reactome: R-HSA-429958|Reactome: R-HSA-450385|Reactome:…
NC_008261.1_142_328	195103.CPF_1935	1.3e-41	175.3	Clostridiaceae	rpsO	GO:0000028,GO:0003674,GO:0003676,GO:0003723,GO:0003735,GO:0005198,GO:0005488,GO:0005575,GO:0005622,GO:0005623,GO:0005737,GO:0005829,GO:0005840,GO:0005886,GO:0006139,GO:0006378,GO:0006396,GO:0006397,GO:0006412,GO:0006518,GO:0006725,GO:0006807,GO:0006996,GO:0008150,GO:0008152,GO:0009058,GO:0009059,GO:0009987,GO:0010467,GO:0015935,GO:0016020,GO:0016043,GO:0016070,GO:0016071,GO:0019538,GO:0019843,GO:…		ko:K02956	ko03010,map03010	M00178,M00179			br01610,ko00000,ko00001,ko00002,ko03011				Bacteria	1VA5C@1239,24MRM@186801,36KHC@31979,COG0184@1,COG0184@2	NA|NA|NA	J	Forms an intersubunit bridge (bridge B4) with the 23S rRNA of the 50S subunit in the ribosome	Gene3D, PANTHER, TIGRFAM, PANTHER, CDD, SMART, Pfam, SUPERFAMILY, Hamap, ProDom, ProSitePatterns	G3DSA:1.10.287.10, PTHR23321, TIGR00952, PTHR23321:SF26, cd00353, SM01387, PF00312, SSF47060, MF_01343_B, PD157043, PS00362	S15_bact: ribosomal protein uS15, Ribosomal_S15p_S13e, Ribosomal protein S15, 30S ribosomal protein S15 [rpsO]., RIBOSOMAL S15 RIBONUCLEOPROTEIN RRNA-BINDING RNA-BINDING 30S CHLOROPLAST S15 MITOCHONDRIAL TYPE, Ribosomal protein S15 signature.	IPR005290, IPR005290, IPR000589, IPR000589, IPR000589, IPR009068, IPR005290, IPR000589	Ribosomal protein S15, bacterial-type, Ribosomal protein S15, bacterial-type, Ribosomal protein S15, Ribosomal protein S15, Ribosomal protein S15, S15/NS1, RNA-binding, Ribosomal protein S15, bacterial-type, Ribosomal protein S15	GO:0003735, GO:0005840, GO:0006412, GO:0003735, GO:0005840, GO:0006412, GO:0003735, GO:0005622, GO:0005840, GO:0006412, GO:0003735, GO:0005622, GO:0005840, GO:0006412, GO:0003735, GO:0005622, GO:0005840, GO:0006412, GO:0003735, GO:0005840, GO:0006412, GO:0003735, GO:0005622, GO:0005840, GO:0006412	Reactome: R-HSA-5368286|Reactome: R-HSA-5389840|Reactome: R-HSA-5419276, Reactome: R-HSA-5368286|Reactome: R-HSA-5389840|Reactome: R-HSA-5419276, Reactome: R-HSA-5368286|Reactome: R-HSA-5389840|Reactome: R-HSA-5419276
NC_008261.1_142_329	195103.CPF_1936	1.2e-169	602.4	Clostridiaceae	ribF		2.7.1.26,2.7.7.2	ko:K11753	ko00740,ko01100,ko01110,map00740,map01100,map01110	M00125	R00161,R00549	RC00002,RC00017	ko00000,ko00001,ko00002,ko01000				Bacteria	1TPKS@1239,2484A@186801,36EA2@31979,COG0196@1,COG0196@2	NA|NA|NA	H	Belongs to the ribF family	SUPERFAMILY, PANTHER, SUPERFAMILY, Coils, Gene3D, SMART, TIGRFAM, Gene3D, Pfam, Pfam, CDD, PANTHER, PIRSF	SSF52374, PTHR22749, SSF82114, Coil, G3DSA:3.40.50.620, SM00904, TIGR00083, G3DSA:2.40.30.30, PF06574, PF01687, cd02064, PTHR22749:SF2, PIRSF004491	ribF: riboflavin biosynthesis protein RibF, FAD synthetase, Riboflavin kinase, FAD_synthetase_N	IPR023468, IPR023465, IPR014729, IPR015865, IPR002606, IPR023465, IPR015864, IPR015865, IPR002606	Riboflavin kinase, Riboflavin kinase domain superfamily, Rossmann-like alpha/beta/alpha sandwich fold, Riboflavin kinase domain, bacterial/eukaryotic, Riboflavin kinase, bacterial, Riboflavin kinase domain superfamily, FAD synthetase, Riboflavin kinase domain, bacterial/eukaryotic, Riboflavin kinase, bacterial	GO:0008531, GO:0009231, GO:0008531, GO:0009231, GO:0003919, GO:0008531, GO:0009231, GO:0008531, GO:0009231, GO:0003919, GO:0009231, GO:0008531, GO:0009231, GO:0003919, GO:0008531, GO:0009231	KEGG: 00740+2.7.1.26|MetaCyc: PWY-5523|MetaCyc: PWY-6168|MetaCyc: PWY-7863|Reactome: R-HSA-196843, Reactome: R-HSA-196843, KEGG: 00740+2.7.1.26|MetaCyc: PWY-5523|MetaCyc: PWY-6168|MetaCyc: PWY-7863|Reactome: R-HSA-196843, KEGG: 00740+2.7.1.26+2.7.7.2|MetaCyc: PWY-5523|MetaCyc: PWY-6167|MetaCyc: PWY-6168|MetaCyc: PWY-7863, Reactome: R-HSA-196843, KEGG: 00740+2.7.1.26+2.7.7.2|MetaCyc: PWY-5523|Meta…
NC_008261.1_142_33	195103.CPF_1637	2.8e-168	597.8	Clostridiaceae													Bacteria	1VICG@1239,24D19@186801,2EAHS@1,334KY@2,36GRF@31979	NA|NA|NA			NA	NA	NA	NA	NA	NA	NA
NC_008261.1_142_330	195103.CPF_1937	1.2e-160	572.4	Clostridiaceae	truB	GO:0001522,GO:0003674,GO:0003824,GO:0006139,GO:0006396,GO:0006399,GO:0006400,GO:0006725,GO:0006807,GO:0008033,GO:0008150,GO:0008152,GO:0009451,GO:0009982,GO:0009987,GO:0010467,GO:0016070,GO:0016071,GO:0016556,GO:0016853,GO:0016866,GO:0034470,GO:0034641,GO:0034660,GO:0043170,GO:0043412,GO:0044237,GO:0044238,GO:0046483,GO:0071704,GO:0090304,GO:1901360,GO:1990481	5.4.99.25	ko:K03177,ko:K03483					ko00000,ko01000,ko03000,ko03016			iSB619.SA_RS06305	Bacteria	1TP9Y@1239,24B46@186801,36EJJ@31979,COG0130@1,COG0130@2	NA|NA|NA	J	Responsible for synthesis of pseudouridine from uracil- 55 in the psi GC loop of transfer RNAs	Pfam, Hamap, Gene3D, CDD, Pfam, TIGRFAM, SUPERFAMILY, PANTHER	PF16198, MF_01080, G3DSA:3.30.2350.10, cd02573, PF01509, TIGR00431, SSF55120, PTHR13767	tRNA pseudouridylate synthase B C-terminal domain, tRNA pseudouridine synthase B [truB]., PseudoU_synth_EcTruB, TruB family pseudouridylate synthase (N terminal domain), TruB: tRNA pseudouridine(55) synthase	IPR032819, IPR014780, IPR002501, IPR014780, IPR020103, IPR014780	tRNA pseudouridylate synthase B, C-terminal, tRNA pseudouridine synthase II, TruB, Pseudouridine synthase II, N-terminal, tRNA pseudouridine synthase II, TruB, Pseudouridine synthase, catalytic domain superfamily, tRNA pseudouridine synthase II, TruB	GO:0001522, GO:0003723, GO:0009451, GO:0009982, GO:0006396, GO:0001522, GO:0003723, GO:0009451, GO:0009982, GO:0001522, GO:0003723, GO:0009451, GO:0009982, GO:0001522, GO:0003723, GO:0009451, GO:0009982	Reactome: R-HSA-171319|Reactome: R-HSA-6790901
NC_008261.1_142_331	195103.CPF_1938	1.5e-169	602.1	Clostridiaceae	nrnA	GO:0008150,GO:0040007	3.1.13.3,3.1.3.7	ko:K06881	ko00920,ko01100,ko01120,map00920,map01100,map01120		R00188,R00508	RC00078	ko00000,ko00001,ko01000,ko03400				Bacteria	1TPXX@1239,248R3@186801,36DFF@31979,COG0618@1,COG0618@2	NA|NA|NA	S	domain protein	Gene3D, SUPERFAMILY, PANTHER, PANTHER, Pfam, Pfam, Gene3D	G3DSA:3.90.1640.10, SSF64182, PTHR13734:SF42, PTHR13734, PF01368, PF02272, G3DSA:3.10.310.30	DHH family, DHHA1 domain	IPR038763, IPR001667, IPR003156	DHH phosphoesterase superfamily, DDH domain, DHHA1 domain	GO:0003676	KEGG: 00190+3.6.1.1|MetaCyc: PWY-7805|MetaCyc: PWY-7807, KEGG: 00970+6.1.1.7|Reactome: R-HSA-379716
NC_008261.1_142_332	195103.CPF_1939	1.1e-53	215.7	Clostridiaceae	rbfA	GO:0003674,GO:0005488,GO:0005575,GO:0005622,GO:0005623,GO:0005737,GO:0005829,GO:0006139,GO:0006364,GO:0006396,GO:0006725,GO:0006807,GO:0006950,GO:0006974,GO:0008150,GO:0008152,GO:0009266,GO:0009409,GO:0009628,GO:0009987,GO:0010467,GO:0016070,GO:0016072,GO:0022613,GO:0030490,GO:0033554,GO:0034470,GO:0034641,GO:0034660,GO:0042254,GO:0042274,GO:0043021,GO:0043024,GO:0043170,GO:0044085,GO:0044237,GO:…		ko:K02834					ko00000,ko03009				Bacteria	1VA0P@1239,24MPB@186801,36JIF@31979,COG0858@1,COG0858@2	NA|NA|NA	J	One of several proteins that assist in the late maturation steps of the functional core of the 30S ribosomal subunit. Associates with free 30S ribosomal subunits (but not with 30S subunits that are part of 70S ribosomes or polysomes). Required for efficient processing of 16S rRNA. May interact with the 5-terminal helix region of 16S rRNA	ProSitePatterns, ProDom, Pfam, TIGRFAM, Coils, PANTHER, Gene3D, Hamap, SUPERFAMILY	PS01319, PD007327, PF02033, TIGR00082, Coil, PTHR33515, G3DSA:3.30.300.20, MF_00003, SSF89919	Ribosome-binding factor A signature., FACTOR A RIBOSOME-BINDING PROCESSING RRNA 3D-STRUCTURE RIBOSOMAL-BINDING PRECURSOR A RBFA, Ribosome-binding factor A, rbfA: ribosome-binding factor A, Ribosome-binding factor A [rbfA].	IPR020053, IPR000238, IPR000238, IPR000238, IPR000238, IPR015946, IPR000238, IPR023799	Ribosome-binding factor A, conserved site, Ribosome-binding factor A, Ribosome-binding factor A, Ribosome-binding factor A, Ribosome-binding factor A, K homology domain-like, alpha/beta, Ribosome-binding factor A, Ribosome-binding factor A domain superfamily	GO:0006364, GO:0006364, GO:0006364, GO:0006364, GO:0006364, GO:0006364
NC_008261.1_142_333	195103.CPF_1940	0	1233	Clostridiaceae	infB	GO:0005575,GO:0005622,GO:0005623,GO:0005737,GO:0044424,GO:0044464		ko:K02519					ko00000,ko03012,ko03029				Bacteria	1TPAI@1239,248SJ@186801,36EJE@31979,COG0532@1,COG0532@2	NA|NA|NA	J	One of the essential components for the initiation of protein synthesis. Protects formylmethionyl-tRNA from spontaneous hydrolysis and promotes its binding to the 30S ribosomal subunits. Also involved in the hydrolysis of GTP during the formation of the 70S ribosomal complex	CDD, Hamap, Coils, Gene3D, SUPERFAMILY, Gene3D, TIGRFAM, Pfam, TIGRFAM, ProSiteProfiles, CDD, ProSitePatterns, PANTHER, Gene3D, CDD, Gene3D, SUPERFAMILY, Coils, Gene3D, PANTHER, Coils, SUPERFAMILY, Pfam, SUPERFAMILY, Pfam, Pfam	cd03702, MF_00100_B, Coil, G3DSA:2.40.30.10, SSF50447, G3DSA:2.40.30.10, TIGR00231, PF00009, TIGR00487, PS51722, cd03692, PS01176, PTHR43381:SF5, G3DSA:3.40.50.300, cd01887, G3DSA:1.10.10.2480, SSF52156, Coil, G3DSA:3.40.50.10050, PTHR43381, Coil, SSF50447, PF11987, SSF52540, PF04760, PF04760	IF2_mtIF2_II, Translation initiation factor IF-2 [infB]., small_GTP: small GTP-binding protein domain, Elongation factor Tu GTP binding domain, IF-2: translation initiation factor IF-2, Translational (tr)-type guanine nucleotide-binding (G) domain profile., mtIF2_IVc, Initiation factor 2 signature., IF2_eIF5B, Translation-initiation factor 2, Translation initiation factor IF-2, N-terminal region,…	IPR000178, IPR009000, IPR005225, IPR000795, IPR000178, IPR000795, IPR000178, IPR036925, IPR036925, IPR015760, IPR009000, IPR023115, IPR027417, IPR006847, IPR006847	Translation initiation factor aIF-2, bacterial-like, Translation protein, beta-barrel domain superfamily, Small GTP-binding protein domain, Transcription factor, GTP-binding domain, Translation initiation factor aIF-2, bacterial-like, Transcription factor, GTP-binding domain, Translation initiation factor aIF-2, bacterial-like, Translation initiation factor IF-2, domain 3 superfamily, Translation…	GO:0003743, GO:0005525, GO:0005622, GO:0006413, GO:0005525, GO:0003924, GO:0005525, GO:0003743, GO:0005525, GO:0005622, GO:0006413, GO:0003924, GO:0005525, GO:0003743, GO:0005525, GO:0005622, GO:0006413	Reactome: R-HSA-5368286, Reactome: R-HSA-5368286, Reactome: R-HSA-5368286
NC_008261.1_142_334	195103.CPF_1941	3e-50	204.1	Clostridiaceae				ko:K07590,ko:K07742	ko03010,map03010	M00178			br01610,ko00000,ko00001,ko00002,ko03011				Bacteria	1VEYG@1239,24QP3@186801,36MPB@31979,COG1358@1,COG1358@2	NA|NA|NA	J	PFAM ribosomal protein L7Ae L30e S12e Gadd45	SUPERFAMILY, PANTHER, Pfam, Gene3D, PANTHER	SSF55315, PTHR11449, PF01248, G3DSA:3.30.1330.30, PTHR11449:SF5	Ribosomal protein L7Ae/L30e/S12e/Gadd45 family	IPR029064, IPR039109, IPR004038, IPR029064, IPR039107	50S ribosomal protein L30e-like, Ribosomal protein L30/YlxQ, Ribosomal protein L7Ae/L30e/S12e/Gadd45, 50S ribosomal protein L30e-like, Ribosomal protein YlxQ	GO:0003723, GO:0003723	Reactome: R-HSA-156827|Reactome: R-HSA-156902|Reactome: R-HSA-1799339|Reactome: R-HSA-192823|Reactome: R-HSA-2408557|Reactome: R-HSA-6791226|Reactome: R-HSA-72689|Reactome: R-HSA-72706|Reactome: R-HSA-72764|Reactome: R-HSA-9010553|Reactome: R-HSA-975956|Reactome: R-HSA-975957
NC_008261.1_142_335	195103.CPF_1942	4.5e-42	176.8	Clostridiaceae	ylxR			ko:K02600,ko:K07742					ko00000,ko03009,ko03021				Bacteria	1VEJS@1239,24QSJ@186801,36KH1@31979,COG2740@1,COG2740@2	NA|NA|NA	K	Nucleic-acid-binding protein implicated in transcription termination	SUPERFAMILY, Pfam, PANTHER, Gene3D, CDD	SSF64376, PF04296, PTHR34215, G3DSA:3.30.1230.10, cd00279	Protein of unknown function (DUF448), YlxR	IPR035931, IPR007393, IPR037465, IPR035931, IPR037465	YlxR-like superfamily, Domain of unknown function DUF448, Uncharacterized protein YlxR, YlxR-like superfamily, Uncharacterized protein YlxR
NC_008261.1_142_336	195103.CPF_1943	4.5e-189	667.2	Clostridiaceae	nusA	GO:0005575,GO:0005622,GO:0005623,GO:0005737,GO:0005829,GO:0006355,GO:0008150,GO:0009889,GO:0010468,GO:0010556,GO:0019219,GO:0019222,GO:0031323,GO:0031326,GO:0031554,GO:0031564,GO:0043244,GO:0044424,GO:0044444,GO:0044464,GO:0050789,GO:0050794,GO:0051128,GO:0051171,GO:0051252,GO:0060255,GO:0065007,GO:0080090,GO:1903506,GO:2000112,GO:2001141		ko:K02600,ko:K02945	ko03010,map03010	M00178			br01610,ko00000,ko00001,ko00002,ko03009,ko03011,ko03021				Bacteria	1TPB3@1239,247W8@186801,36DXE@31979,COG0195@1,COG0195@2	NA|NA|NA	K	Participates in both transcription termination and antitermination	Gene3D, CDD, TIGRFAM, SUPERFAMILY, Hamap, Gene3D, SUPERFAMILY, Pfam, SMART, SMART, ProSiteProfiles, Pfam, CDD, Pfam, Gene3D, ProSiteProfiles, SUPERFAMILY, SMART, CDD, Gene3D, SUPERFAMILY, PANTHER	G3DSA:3.30.1480.10, cd02134, TIGR01953, SSF54814, MF_00945_B, G3DSA:3.30.300.20, SSF54814, PF13184, SM00322, SM00322, PS50084, PF08529, cd04455, PF00575, G3DSA:3.30.300.20, PS50126, SSF69705, SM00316, cd02134, G3DSA:2.40.50.140, SSF50249, PTHR22648	NusA_KH, NusA: transcription termination factor NusA, Transcription termination/antitermination protein NusA [nusA]., NusA-like KH domain, Type-1 KH domain profile., NusA N-terminal domain, S1_NusA, S1 RNA binding domain, S1 domain profile., NusA_KH	IPR036555, IPR010213, IPR009019, IPR030842, IPR015946, IPR009019, IPR025249, IPR004087, IPR004087, IPR013735, IPR003029, IPR015946, IPR003029, IPR036555, IPR022967, IPR012340, IPR030842	NusA, N-terminal domain superfamily, Transcription termination factor NusA, K homology domain superfamily, prokaryotic type, Transcription termination/antitermination protein NusA, bacterial, K homology domain-like, alpha/beta, K homology domain superfamily, prokaryotic type, KH domain, NusA-like, K Homology domain, K Homology domain, Transcription factor NusA, N-terminal, S1 domain, K homology d…	GO:0003700, GO:0031554, GO:0003723, GO:0003723, GO:0006353, GO:0031564, GO:0003723, GO:0003723, GO:0003676, GO:0003676, GO:0003700, GO:0031554, GO:0003676, GO:0003676, GO:0003700, GO:0031554, GO:0006353, GO:0031564
NC_008261.1_142_337	195103.CPF_1944	4.7e-79	300.4	Clostridiaceae	rimP	GO:0000028,GO:0005575,GO:0005622,GO:0005623,GO:0005737,GO:0005829,GO:0005886,GO:0006412,GO:0006518,GO:0006807,GO:0006996,GO:0008150,GO:0008152,GO:0009058,GO:0009059,GO:0009987,GO:0010467,GO:0016020,GO:0016043,GO:0019538,GO:0022607,GO:0022613,GO:0022618,GO:0034622,GO:0034641,GO:0034645,GO:0042254,GO:0042255,GO:0042274,GO:0043043,GO:0043170,GO:0043603,GO:0043604,GO:0043933,GO:0044085,GO:0044237,GO:…		ko:K09748					ko00000,ko03009				Bacteria	1V6KT@1239,24N1G@186801,36JKE@31979,COG0779@1,COG0779@2	NA|NA|NA	S	Required for maturation of 30S ribosomal subunits	PANTHER, Pfam, Pfam, Hamap, SUPERFAMILY, SUPERFAMILY, Gene3D, CDD, Gene3D	PTHR33867, PF02576, PF17384, MF_01077, SSF75420, SSF74942, G3DSA:3.30.300.70, cd01734, G3DSA:2.30.30.180	RimP N-terminal domain, RimP C-terminal SH3 domain, Ribosome maturation factor RimP [rimP]., YlxS_C	IPR003728, IPR028989, IPR028998, IPR003728, IPR035956, IPR036847, IPR035956, IPR028998	Ribosome maturation factor RimP, Ribosome maturation factor RimP, N-terminal, Ribosome maturation factor RimP, C-terminal, Ribosome maturation factor RimP, RimP, N-terminal domain superfamily, Ribosome maturation factor RimP, C-terminal domain superfamily, RimP, N-terminal domain superfamily, Ribosome maturation factor RimP, C-terminal	GO:0042274, GO:0042274
NC_008261.1_142_338	195103.CPF_1945	0	2855.9	Clostridiaceae	polC	GO:0005575,GO:0005622,GO:0005623,GO:0005737,GO:0044424,GO:0044464	2.7.7.7	ko:K02342,ko:K03763	ko00230,ko00240,ko01100,ko03030,ko03430,ko03440,map00230,map00240,map01100,map03030,map03430,map03440	M00260	R00375,R00376,R00377,R00378	RC02795	ko00000,ko00001,ko00002,ko01000,ko03032,ko03400				Bacteria	1TPAG@1239,248YB@186801,36DEW@31979,COG2176@1,COG2176@2	NA|NA|NA	L	Required for replicative DNA synthesis. This DNA polymerase also exhibits 3 to 5 exonuclease activity	Pfam, CDD, MobiDBLite, TIGRFAM, Pfam, Pfam, SMART, Gene3D, Gene3D, Gene3D, Gene3D, Gene3D, SUPERFAMILY, PANTHER, CDD, Pfam, SMART, Gene3D, Hamap, PANTHER, MobiDBLite, Pfam, Gene3D, TIGRFAM, Gene3D, Coils, CDD, Gene3D	PF02811, cd04484, mobidb-lite, TIGR01405, PF14579, PF00929, SM00479, G3DSA:1.10.150.870, G3DSA:1.10.100.20, G3DSA:1.10.150.700, G3DSA:1.10.150.700, G3DSA:3.20.20.140, SSF53098, PTHR23044:SF26, cd07435, PF11490, SM00481, G3DSA:2.40.50.140, MF_00356, PTHR23044, mobidb-lite, PF07733, G3DSA:3.30.1900.20, TIGR00573, G3DSA:3.20.20.140, Coil, cd06127, G3DSA:3.30.420.10	PHP domain, polC_OBF, consensus disorder prediction, polC_Gram_pos: DNA polymerase III, alpha subunit, Gram-positive type, Helix-hairpin-helix motif, Exonuclease, PHP_PolIIIA_POLC, DNA polymerase III polC-type N-terminus II, DNA polymerase III PolC-type [polC]., consensus disorder prediction, Bacterial DNA polymerase III alpha subunit, dnaq: exonuclease, DNA polymerase III, epsilon subunit family…	IPR004013, IPR006308, IPR029460, IPR013520, IPR013520, IPR012337, IPR024754, IPR003141, IPR006308, IPR011708, IPR006054, IPR036397	PHP domain, DNA polymerase III, alpha subunit, Gram-positive type, DNA polymerase, helix-hairpin-helix motif, Exonuclease, RNase T/DNA polymerase III, Exonuclease, RNase T/DNA polymerase III, Ribonuclease H-like superfamily, DNA polymerase III polC-like, N-terminal domain II, Polymerase/histidinol phosphatase, N-terminal, DNA polymerase III, alpha subunit, Gram-positive type, Bacterial DNA polyme…	GO:0003824, GO:0003677, GO:0003887, GO:0005737, GO:0006260, GO:0003677, GO:0003887, GO:0005737, GO:0006260, GO:0006260, GO:0008408, GO:0003677, GO:0003887, GO:0006260, GO:0003676	KEGG: 00230+2.7.7.7|KEGG: 00240+2.7.7.7, KEGG: 00230+2.7.7.7|KEGG: 00240+2.7.7.7, KEGG: 00230+2.7.7.7|KEGG: 00240+2.7.7.7, KEGG: 00230+2.7.7.7|KEGG: 00240+2.7.7.7, KEGG: 00230+2.7.7.7|KEGG: 00240+2.7.7.7, KEGG: 00230+2.7.7.7|KEGG: 00240+2.7.7.7
NC_008261.1_142_339	195103.CPF_1946	3.7e-188	664.1	Clostridiaceae	ispG	GO:0003674,GO:0003824,GO:0005488,GO:0005575,GO:0005618,GO:0005622,GO:0005623,GO:0005737,GO:0005829,GO:0005886,GO:0006081,GO:0006082,GO:0006090,GO:0006091,GO:0006629,GO:0006644,GO:0006720,GO:0006793,GO:0006796,GO:0008150,GO:0008152,GO:0008299,GO:0008610,GO:0008654,GO:0009055,GO:0009058,GO:0009240,GO:0009987,GO:0016020,GO:0016491,GO:0016725,GO:0019288,GO:0019637,GO:0019682,GO:0019752,GO:0022900,GO:…	1.17.7.1,1.17.7.3	ko:K03526	ko00900,ko01100,ko01110,ko01130,map00900,map01100,map01110,map01130	M00096	R08689,R10859	RC01486	ko00000,ko00001,ko00002,ko01000			iAF1260.b2515,iAPECO1_1312.APECO1_4009,iB21_1397.B21_02369,iBWG_1329.BWG_2279,iE2348C_1286.E2348C_2798,iEC55989_1330.EC55989_2800,iECABU_c1320.ECABU_c28200,iECBD_1354.ECBD_1171,iECB_1328.ECB_02407,iECDH10B_1368.ECDH10B_2681,iECDH1ME8569_1439.ECDH1ME8569_2442,iECDH1ME8569_1439.EcDH1_1153,iECD_1391.ECD_02407,iECED1_1282.ECED1_2946,iECH74115_1262.ECH74115_3740,iECIAI39_1322.ECIAI39_2716,iECNA114_130…	Bacteria	1TPFR@1239,247N1@186801,36DRW@31979,COG0821@1,COG0821@2	NA|NA|NA	I	Converts 2C-methyl-D-erythritol 2,4-cyclodiphosphate (ME-2,4cPP) into 1-hydroxy-2-methyl-2-(E)-butenyl 4-diphosphate	Gene3D, TIGRFAM, Hamap, PANTHER, SUPERFAMILY, Pfam, SUPERFAMILY, Gene3D, PIRSF	G3DSA:3.30.413.10, TIGR00612, MF_00159, PTHR30454, SSF56014, PF04551, SSF51717, G3DSA:3.20.20.20, PIRSF004640	ispG_gcpE: 4-hydroxy-3-methylbut-2-en-1-yl diphosphate synthase, 4-hydroxy-3-methylbut-2-en-1-yl diphosphate synthase (ferredoxin) [ispG]., GcpE protein	IPR004588, IPR004588, IPR004588, IPR004588, IPR011005, IPR011005, IPR016425	4-hydroxy-3-methylbut-2-en-1-yl diphosphate synthase, bacterial-type, 4-hydroxy-3-methylbut-2-en-1-yl diphosphate synthase, bacterial-type, 4-hydroxy-3-methylbut-2-en-1-yl diphosphate synthase, bacterial-type, 4-hydroxy-3-methylbut-2-en-1-yl diphosphate synthase, bacterial-type, Dihydropteroate synthase-like, Dihydropteroate synthase-like, 4-hydroxy-3-methylbut-2-en-1-yl diphosphate synthase, bac…	GO:0016114, GO:0046429, GO:0055114, GO:0016114, GO:0046429, GO:0055114, GO:0016114, GO:0046429, GO:0055114, GO:0016114, GO:0046429, GO:0055114, GO:0044237, GO:0044237, GO:0005506, GO:0008299, GO:0046429, GO:0055114	KEGG: 00900+1.17.7.3, KEGG: 00900+1.17.7.3, KEGG: 00900+1.17.7.3, KEGG: 00900+1.17.7.3, Reactome: R-HSA-156581|Reactome: R-HSA-1614635|Reactome: R-HSA-196741|Reactome: R-HSA-3359467|Reactome: R-HSA-3359469, Reactome: R-HSA-156581|Reactome: R-HSA-1614635|Reactome: R-HSA-196741|Reactome: R-HSA-3359467|Reactome: R-HSA-3359469, KEGG: 00900+1.17.7.3
NC_008261.1_142_34	1280689.AUJC01000001_gene2143	2.6e-07	62.4	Clostridiaceae													Bacteria	1UFNQ@1239,24HWH@186801,29UYE@1,30GBA@2,36NRK@31979	NA|NA|NA			MobiDBLite, MobiDBLite, MobiDBLite	mobidb-lite, mobidb-lite, mobidb-lite	consensus disorder prediction, consensus disorder prediction, consensus disorder prediction
NC_008261.1_142_340	195103.CPF_1947	7.3e-178	629.8	Clostridiaceae	rseP		3.4.21.116	ko:K06399,ko:K11749	ko02024,ko04112,map02024,map04112				ko00000,ko00001,ko01000,ko01002				Bacteria	1TPMC@1239,247MT@186801,36G12@31979,COG0750@1,COG0750@2	NA|NA|NA	M	zinc metalloprotease	Pfam, Pfam, ProSiteProfiles, SMART, CDD, PANTHER, SUPERFAMILY, Gene3D, TIGRFAM, CDD	PF13180, PF02163, PS50106, SM00228, cd00989, PTHR42837, SSF50156, G3DSA:2.30.42.10, TIGR00054, cd06163	PDZ domain, Peptidase family M50, PDZ domain profile., PDZ_metalloprotease, TIGR00054: RIP metalloprotease RseP, S2P-M50_PDZ_RseP-like	IPR001478, IPR008915, IPR001478, IPR001478, IPR036034, IPR004387	PDZ domain, Peptidase M50, PDZ domain, PDZ domain, PDZ superfamily, Peptidase M50, putative membrane-associated zinc metallopeptidase	GO:0005515, GO:0004222, GO:0006508, GO:0005515, GO:0005515, GO:0005515, GO:0004222, GO:0006508, GO:0016021	Reactome: R-HSA-1655829|Reactome: R-HSA-381033|Reactome: R-HSA-8874211|Reactome: R-HSA-8963889
NC_008261.1_142_341	195103.CPF_1948	1.5e-214	751.9	Clostridiaceae	dxr	GO:0000166,GO:0000287,GO:0003674,GO:0003824,GO:0005488,GO:0005515,GO:0006081,GO:0006082,GO:0006090,GO:0006629,GO:0006644,GO:0006720,GO:0006721,GO:0006793,GO:0006796,GO:0008150,GO:0008152,GO:0008299,GO:0008610,GO:0008654,GO:0009058,GO:0009240,GO:0009987,GO:0016114,GO:0016491,GO:0016614,GO:0016616,GO:0019288,GO:0019637,GO:0019682,GO:0019752,GO:0030145,GO:0030604,GO:0032787,GO:0036094,GO:0042802,GO:…	1.1.1.267	ko:K00099	ko00900,ko01100,ko01110,ko01130,map00900,map01100,map01110,map01130	M00096	R05688	RC01452	ko00000,ko00001,ko00002,ko01000			iAPECO1_1312.APECO1_1814,iECOK1_1307.ECOK1_0174,iECS88_1305.ECS88_0183,iHN637.CLJU_RS06420,iNJ661.Rv2870c,iUMN146_1321.UM146_23670,iUTI89_1310.UTI89_C0188	Bacteria	1TP1C@1239,2483M@186801,36ECF@31979,COG0743@1,COG0743@2	NA|NA|NA	I	Catalyzes the NADP-dependent rearrangement and reduction of 1-deoxy-D-xylulose-5-phosphate (DXP) to 2-C-methyl-D-erythritol 4-phosphate (MEP)	PANTHER, Gene3D, SUPERFAMILY, Gene3D, PIRSF, Pfam, SUPERFAMILY, SUPERFAMILY, Pfam, Hamap, Pfam, TIGRFAM	PTHR30525, G3DSA:3.40.50.720, SSF55347, G3DSA:1.10.1740.10, PIRSF006205, PF08436, SSF51735, SSF69055, PF13288, MF_00183, PF02670, TIGR00243	1-deoxy-D-xylulose 5-phosphate reductoisomerase C-terminal, DXP reductoisomerase C-terminal domain, 1-deoxy-D-xylulose 5-phosphate reductoisomerase [dxr]., 1-deoxy-D-xylulose 5-phosphate reductoisomerase, Dxr: 1-deoxy-D-xylulose 5-phosphate reductoisomerase	IPR003821, IPR003821, IPR013644, IPR036291, IPR036169, IPR026877, IPR003821, IPR013512, IPR003821	1-deoxy-D-xylulose 5-phosphate reductoisomerase, 1-deoxy-D-xylulose 5-phosphate reductoisomerase, 1-deoxy-D-xylulose 5-phosphate reductoisomerase, C-terminal, NAD(P)-binding domain superfamily, DXP reductoisomerase, C-terminal domain superfamily, DXP reductoisomerase C-terminal domain, 1-deoxy-D-xylulose 5-phosphate reductoisomerase, 1-deoxy-D-xylulose 5-phosphate reductoisomerase, N-terminal, 1-…	GO:0008299, GO:0030604, GO:0046872, GO:0055114, GO:0008299, GO:0030604, GO:0046872, GO:0055114, GO:0005515, GO:0008299, GO:0030604, GO:0046872, GO:0055114, GO:0055114, GO:0070402, GO:0008299, GO:0030604, GO:0046872, GO:0055114	KEGG: 00900+1.1.1.267|MetaCyc: PWY-7560, KEGG: 00900+1.1.1.267|MetaCyc: PWY-7560, KEGG: 00900+1.1.1.267|MetaCyc: PWY-7560, KEGG: 00900+1.1.1.267|MetaCyc: PWY-7560, KEGG: 00900+1.1.1.267|MetaCyc: PWY-7560, KEGG: 00900+1.1.1.267|MetaCyc: PWY-7560, KEGG: 00900+1.1.1.267|MetaCyc: PWY-7560, KEGG: 00900+1.1.1.267|MetaCyc: PWY-7560
NC_008261.1_142_342	195103.CPF_1949	1.3e-140	505.8	Clostridiaceae	cdsA	GO:0003674,GO:0003824,GO:0004605,GO:0005575,GO:0006139,GO:0006220,GO:0006221,GO:0006629,GO:0006644,GO:0006650,GO:0006655,GO:0006725,GO:0006753,GO:0006793,GO:0006796,GO:0006807,GO:0008150,GO:0008152,GO:0008610,GO:0008654,GO:0009058,GO:0009117,GO:0009165,GO:0009987,GO:0016020,GO:0016024,GO:0016740,GO:0016772,GO:0016779,GO:0018130,GO:0019438,GO:0019637,GO:0034641,GO:0034654,GO:0044237,GO:0044238,GO:…	2.7.7.41	ko:K00981	ko00564,ko01100,ko01110,ko04070,map00564,map01100,map01110,map04070	M00093	R01799	RC00002	ko00000,ko00001,ko00002,ko01000			iLJ478.TM1397	Bacteria	1UPNB@1239,248BP@186801,36E6I@31979,COG0575@1,COG0575@2	NA|NA|NA	I	Belongs to the CDS family	PANTHER, PANTHER, ProSitePatterns, Pfam	PTHR13773:SF0, PTHR13773, PS01315, PF01148	Phosphatidate cytidylyltransferase signature., Cytidylyltransferase family	IPR000374	Phosphatidate cytidylyltransferase	GO:0016020, GO:0016772	KEGG: 00564+2.7.7.41|KEGG: 04070+2.7.7.41|MetaCyc: PWY-5667|MetaCyc: PWY-5981|MetaCyc: PWY-7817
NC_008261.1_142_343	195103.CPF_1950	3.4e-143	514.2	Clostridiaceae	uppS	GO:0002094,GO:0003674,GO:0003824,GO:0004659,GO:0005575,GO:0005622,GO:0005623,GO:0005737,GO:0005829,GO:0006066,GO:0006629,GO:0006720,GO:0008150,GO:0008152,GO:0008299,GO:0008610,GO:0009058,GO:0009987,GO:0016093,GO:0016094,GO:0016740,GO:0016765,GO:0044237,GO:0044238,GO:0044249,GO:0044255,GO:0044281,GO:0044283,GO:0044424,GO:0044444,GO:0044464,GO:0046165,GO:0071704,GO:1901576,GO:1901615,GO:1901617	2.5.1.31	ko:K00806	ko00900,ko01110,map00900,map01110		R06447	RC00279,RC02839	ko00000,ko00001,ko01000,ko01006				Bacteria	1TQTS@1239,247TE@186801,36DDR@31979,COG0020@1,COG0020@2	NA|NA|NA	H	Catalyzes the condensation of isopentenyl diphosphate (IPP) with allylic pyrophosphates generating different type of terpenoids	SUPERFAMILY, CDD, Gene3D, PANTHER, Pfam, ProSitePatterns, TIGRFAM, Hamap, PANTHER	SSF64005, cd00475, G3DSA:3.40.1180.10, PTHR10291:SF0, PF01255, PS01066, TIGR00055, MF_01139, PTHR10291	Cis_IPPS, Putative undecaprenyl diphosphate synthase, Undecaprenyl pyrophosphate synthase family signature., uppS: di-trans,poly-cis-decaprenylcistransferase, Ditrans,polycis-undecaprenyl-diphosphate synthase ((2E,6E)-farnesyl-diphosphate specific) [uppS].	IPR036424, IPR001441, IPR036424, IPR001441, IPR018520, IPR001441, IPR001441, IPR001441	Decaprenyl diphosphate synthase-like superfamily, Decaprenyl diphosphate synthase-like, Decaprenyl diphosphate synthase-like superfamily, Decaprenyl diphosphate synthase-like, Di-trans-poly-cis-decaprenylcistransferase-like, conserved site, Decaprenyl diphosphate synthase-like, Decaprenyl diphosphate synthase-like, Decaprenyl diphosphate synthase-like	GO:0016765, GO:0016765, GO:0016765, GO:0016765, GO:0016765, GO:0016765, GO:0016765, GO:0016765	Reactome: R-HSA-446199, Reactome: R-HSA-446199, Reactome: R-HSA-446199, Reactome: R-HSA-446199, Reactome: R-HSA-446199|Reactome: R-HSA-4755609, Reactome: R-HSA-446199, Reactome: R-HSA-446199, Reactome: R-HSA-446199
NC_008261.1_142_344	195103.CPF_1951	1.1e-93	349.4	Clostridiaceae	frr	GO:0002181,GO:0002184,GO:0003674,GO:0003676,GO:0003723,GO:0005488,GO:0005575,GO:0005618,GO:0005622,GO:0005623,GO:0005737,GO:0005829,GO:0005886,GO:0006412,GO:0006415,GO:0006518,GO:0006807,GO:0008079,GO:0008135,GO:0008150,GO:0008152,GO:0009058,GO:0009059,GO:0009987,GO:0010467,GO:0016020,GO:0016043,GO:0019538,GO:0022411,GO:0030312,GO:0032984,GO:0034641,GO:0034645,GO:0040007,GO:0043021,GO:0043023,GO:…		ko:K02838					ko00000,ko03012				Bacteria	1V1F2@1239,24HWS@186801,36E62@31979,COG0233@1,COG0233@2	NA|NA|NA	J	Responsible for the release of ribosomes from messenger RNA at the termination of protein biosynthesis. May increase the efficiency of translation by recycling ribosomes from one round of translation to another	Pfam, PANTHER, Gene3D, Hamap, Gene3D, CDD, TIGRFAM, SUPERFAMILY	PF01765, PTHR20982, G3DSA:1.10.132.20, MF_00040, G3DSA:3.30.1360.40, cd00520, TIGR00496, SSF55194	Ribosome recycling factor, Ribosome-recycling factor [frr]., RRF, frr: ribosome recycling factor	IPR023584, IPR002661, IPR002661, IPR002661, IPR002661, IPR036191	Ribosome recycling factor domain, Ribosome recycling factor, Ribosome recycling factor, Ribosome recycling factor, Ribosome recycling factor, RRF superfamily	GO:0006412, GO:0006412, GO:0006412, GO:0006412	Reactome: R-HSA-5419276, Reactome: R-HSA-5419276, Reactome: R-HSA-5419276, Reactome: R-HSA-5419276, Reactome: R-HSA-5419276, Reactome: R-HSA-5419276
NC_008261.1_142_345	195103.CPF_1952	7.1e-127	459.9	Clostridiaceae	pyrH	GO:0000287,GO:0003674,GO:0003824,GO:0005488,GO:0005575,GO:0005623,GO:0005886,GO:0006139,GO:0006213,GO:0006220,GO:0006221,GO:0006225,GO:0006725,GO:0006753,GO:0006793,GO:0006796,GO:0006807,GO:0008150,GO:0008152,GO:0009041,GO:0009058,GO:0009116,GO:0009117,GO:0009119,GO:0009123,GO:0009132,GO:0009133,GO:0009138,GO:0009139,GO:0009163,GO:0009165,GO:0009185,GO:0009188,GO:0009193,GO:0009194,GO:0009218,GO:…	2.7.4.22	ko:K09903	ko00240,ko01100,map00240,map01100		R00158	RC00002	ko00000,ko00001,ko01000			iSB619.SA_RS06240	Bacteria	1TPXN@1239,247KR@186801,36DV4@31979,COG0528@1,COG0528@2	NA|NA|NA	F	Catalyzes the reversible phosphorylation of UMP to UDP	TIGRFAM, PIRSF, PRINTS, PRINTS, PANTHER, Pfam, SUPERFAMILY, Hamap, CDD, Gene3D	TIGR02075, PIRSF005650, PR00474, PR00474, PTHR42833, PF00696, SSF53633, MF_01220_B, cd04254, G3DSA:3.40.1160.10	pyrH_bact: UMP kinase, Glutamate 5-kinase family signature, Glutamate 5-kinase family signature, Amino acid kinase family, Uridylate kinase [pyrH]., AAK_UMPK-PyrH-Ec	IPR015963, IPR011817, IPR001057, IPR001057, IPR001048, IPR036393, IPR015963, IPR036393	Uridylate kinase, bacteria, Uridylate kinase, Glutamate/acetylglutamate kinase, Glutamate/acetylglutamate kinase, Aspartate/glutamate/uridylate kinase, Acetylglutamate kinase-like superfamily, Uridylate kinase, bacteria, Acetylglutamate kinase-like superfamily	GO:0005737, GO:0006221, GO:0033862, GO:0006221, GO:0009041, GO:0005737, GO:0006221, GO:0033862	KEGG: 00240+2.7.4.22, KEGG: 00240+2.7.4.22, Reactome: R-HSA-70614, Reactome: R-HSA-70614, Reactome: R-HSA-70614, KEGG: 00240+2.7.4.22
NC_008261.1_142_346	195103.CPF_1953	6.2e-160	570.1	Clostridiaceae	tsf	GO:0001871,GO:0003674,GO:0003676,GO:0003723,GO:0003746,GO:0005085,GO:0005488,GO:0005515,GO:0005575,GO:0005622,GO:0005623,GO:0005737,GO:0005829,GO:0006412,GO:0006414,GO:0006518,GO:0006807,GO:0008135,GO:0008150,GO:0008152,GO:0008270,GO:0009058,GO:0009059,GO:0009986,GO:0009987,GO:0010467,GO:0019538,GO:0019899,GO:0030246,GO:0030247,GO:0034641,GO:0034645,GO:0043043,GO:0043167,GO:0043169,GO:0043170,GO:…		ko:K02357					ko00000,ko03012,ko03029				Bacteria	1TPFJ@1239,248J2@186801,36DEJ@31979,COG0264@1,COG0264@2	NA|NA|NA	J	Associates with the EF-Tu.GDP complex and induces the exchange of GDP to GTP. It remains bound to the aminoacyl-tRNA.EF- Tu.GTP complex up to the GTP hydrolysis stage on the ribosome	Gene3D, Hamap, Gene3D, Coils, Pfam, SUPERFAMILY, TIGRFAM, Gene3D, ProSitePatterns, Gene3D, SUPERFAMILY, ProSitePatterns, SUPERFAMILY, PANTHER, Coils, CDD	G3DSA:1.10.8.10, MF_00050, G3DSA:1.10.286.20, Coil, PF00889, SSF46934, TIGR00116, G3DSA:3.30.479.20, PS01127, G3DSA:3.30.479.20, SSF54713, PS01126, SSF54713, PTHR11741, Coil, cd14275	Elongation factor Ts [tsf]., Elongation factor TS, tsf: translation elongation factor Ts, Elongation factor Ts signature 2., Elongation factor Ts signature 1., UBA_EF-Ts	IPR001816, IPR014039, IPR009060, IPR001816, IPR036402, IPR018101, IPR036402, IPR036402, IPR018101, IPR036402, IPR001816	Translation elongation factor EFTs/EF1B, Translation elongation factor EFTs/EF1B, dimerisation, UBA-like superfamily, Translation elongation factor EFTs/EF1B, Elongation factor Ts, dimerisation domain superfamily, Translation elongation factor Ts, conserved site, Elongation factor Ts, dimerisation domain superfamily, Elongation factor Ts, dimerisation domain superfamily, Translation elongation fa…	GO:0003746, GO:0005622, GO:0006414, GO:0003746, GO:0006414, GO:0005515, GO:0003746, GO:0005622, GO:0006414, GO:0003746, GO:0005622, GO:0006414, GO:0003746, GO:0005622, GO:0006414, GO:0003746, GO:0005622, GO:0006414	Reactome: R-HSA-5389840, Reactome: R-HSA-5389840, Reactome: R-HSA-5389840, Reactome: R-HSA-5389840, Reactome: R-HSA-5389840, Reactome: R-HSA-5389840, Reactome: R-HSA-5389840, Reactome: R-HSA-5389840, Reactome: R-HSA-5389840, Reactome: R-HSA-5389840
NC_008261.1_142_347	195103.CPF_1954	1.7e-125	455.3	Clostridiaceae	rpsB	GO:0000028,GO:0003674,GO:0003735,GO:0005198,GO:0005488,GO:0005575,GO:0005618,GO:0005622,GO:0005623,GO:0005737,GO:0005829,GO:0005840,GO:0005886,GO:0006412,GO:0006518,GO:0006807,GO:0006996,GO:0008150,GO:0008152,GO:0008270,GO:0009058,GO:0009059,GO:0009987,GO:0010467,GO:0015935,GO:0016020,GO:0016043,GO:0019538,GO:0022607,GO:0022613,GO:0022618,GO:0022626,GO:0022627,GO:0030312,GO:0032991,GO:0034622,GO:…		ko:K02967	ko03010,map03010	M00178,M00179			br01610,ko00000,ko00001,ko00002,ko03011				Bacteria	1TPNA@1239,247ZR@186801,36DHW@31979,COG0052@1,COG0052@2	NA|NA|NA	J	Belongs to the universal ribosomal protein uS2 family	TIGRFAM, Coils, Gene3D, Pfam, Hamap, PANTHER, SUPERFAMILY, PANTHER, Gene3D, PRINTS, PRINTS, PRINTS, PRINTS, PRINTS, PRINTS, ProSitePatterns, CDD	TIGR01011, Coil, G3DSA:1.10.287.610, PF00318, MF_00291_B, PTHR12534:SF0, SSF52313, PTHR12534, G3DSA:3.40.50.10490, PR00395, PR00395, PR00395, PR00395, PR00395, PR00395, PS00962, cd01425	rpsB_bact: ribosomal protein uS2, Ribosomal protein S2, 30S ribosomal protein S2 [rpsB]., Ribosomal protein S2 signature, Ribosomal protein S2 signature, Ribosomal protein S2 signature, Ribosomal protein S2 signature, Ribosomal protein S2 signature, Ribosomal protein S2 signature, Ribosomal protein S2 signature 1., RPS2	IPR005706, IPR001865, IPR005706, IPR023591, IPR005706, IPR001865, IPR001865, IPR001865, IPR001865, IPR001865, IPR001865, IPR018130, IPR001865	Ribosomal protein S2, bacteria/mitochondria/plastid, Ribosomal protein S2, Ribosomal protein S2, bacteria/mitochondria/plastid, Ribosomal protein S2, flavodoxin-like domain superfamily, Ribosomal protein S2, bacteria/mitochondria/plastid, Ribosomal protein S2, Ribosomal protein S2, Ribosomal protein S2, Ribosomal protein S2, Ribosomal protein S2, Ribosomal protein S2, Ribosomal protein S2, conser…	GO:0003735, GO:0006412, GO:0015935, GO:0003735, GO:0005622, GO:0005840, GO:0006412, GO:0003735, GO:0006412, GO:0015935, GO:0003735, GO:0006412, GO:0015935, GO:0003735, GO:0005622, GO:0005840, GO:0006412, GO:0003735, GO:0005622, GO:0005840, GO:0006412, GO:0003735, GO:0005622, GO:0005840, GO:0006412, GO:0003735, GO:0005622, GO:0005840, GO:0006412, GO:0003735, GO:0005622, GO:0005840, GO:0006412, GO:…	Reactome: R-HSA-5368286|Reactome: R-HSA-5389840|Reactome: R-HSA-5419276, Reactome: R-HSA-5368286|Reactome: R-HSA-5389840|Reactome: R-HSA-5419276, Reactome: R-HSA-5368286|Reactome: R-HSA-5389840|Reactome: R-HSA-5419276
NC_008261.1_142_348	195103.CPF_1955	9.7e-138	496.1	Clostridiaceae	codY			ko:K03706					ko00000,ko03000				Bacteria	1TS7A@1239,2480R@186801,36E2I@31979,COG4465@1,COG4465@2	NA|NA|NA	K	DNA-binding protein that represses the expression of many genes that are induced as cells make the transition from rapid exponential growth to stationary phase. It is a GTP-binding protein that senses the intracellular GTP concentration as an indicator of nutritional limitations. At low GTP concentration it no longer binds GTP and stop to act as a transcriptional repressor	Gene3D, SUPERFAMILY, PIRSF, Hamap, Gene3D, PANTHER, Pfam, Pfam, TIGRFAM	G3DSA:1.10.10.10, SSF46785, PIRSF011572, MF_00621, G3DSA:3.30.450.40, PTHR40062, PF06018, PF08222, TIGR02787	GTP-sensing transcriptional pleiotropic repressor CodY [codY]., CodY GAF-like domain, CodY helix-turn-helix domain, codY_Gpos: GTP-sensing transcriptional pleiotropic repressor CodY	IPR036388, IPR036390, IPR014154, IPR014154, IPR029016, IPR014154, IPR010312, IPR013198, IPR014154	Winged helix-like DNA-binding domain superfamily, Winged helix DNA-binding domain superfamily, GTP-sensing transcriptional pleiotropic repressor CodY, GTP-sensing transcriptional pleiotropic repressor CodY, GAF-like domain superfamily, GTP-sensing transcriptional pleiotropic repressor CodY, GTP-sensing transcriptional pleiotropic repressor CodY, N-terminal, GTP-sensing helix-turn-helix, CodY, C-t…	GO:0003677, GO:0003700, GO:0005525, GO:0045892, GO:0003677, GO:0003700, GO:0005525, GO:0045892, GO:0003677, GO:0003700, GO:0005525, GO:0045892, GO:0003677, GO:0005525, GO:0003677, GO:0003700, GO:0005525, GO:0045892
NC_008261.1_142_349	195103.CPF_1956	0	1319.7	Clostridiaceae	topA		5.99.1.2	ko:K03168					ko00000,ko01000,ko03032,ko03400				Bacteria	1TPUS@1239,248MG@186801,36DSI@31979,COG0550@1,COG0550@2	NA|NA|NA	L	Releases the supercoiling and torsional tension of DNA, which is introduced during the DNA replication and transcription, by transiently cleaving and rejoining one strand of the DNA duplex. Introduces a single-strand break via transesterification at a target site in duplex DNA. The scissile phosphodiester is attacked by the catalytic tyrosine of the enzyme, resulting in the formation of a DNA-(5-…	Pfam, CDD, Gene3D, Pfam, Gene3D, ProSitePatterns, PANTHER, TIGRFAM, SUPERFAMILY, Hamap, SMART, Coils, SUPERFAMILY, SMART, Pfam, Pfam, Pfam, Gene3D, PRINTS, PRINTS, PRINTS, PRINTS, PRINTS, Gene3D, ProSiteProfiles, CDD, SUPERFAMILY, Gene3D, SMART	PF01131, cd00186, G3DSA:3.40.50.140, PF01751, G3DSA:2.70.20.10, PS00396, PTHR42785, TIGR01051, SSF57783, MF_00952, SM00436, Coil, SSF56712, SM00437, PF01396, PF01396, PF01396, G3DSA:1.10.290.10, PR00417, PR00417, PR00417, PR00417, PR00417, G3DSA:3.30.65.10, PS50880, cd03363, SSF57783, G3DSA:1.10.460.10, SM00493	DNA topoisomerase, TOP1Ac, Toprim domain, Prokaryotic DNA topoisomerase I active site., topA_bact: DNA topoisomerase I, DNA topoisomerase 1 [topA]., Topoisomerase DNA binding C4 zinc finger, Topoisomerase DNA binding C4 zinc finger, Topoisomerase DNA binding C4 zinc finger, Prokaryotic DNA topoisomerase I signature, Prokaryotic DNA topoisomerase I signature, Prokaryotic DNA topoisomerase I signat…	IPR013497, IPR013497, IPR006171, IPR013825, IPR023406, IPR000380, IPR005733, IPR028612, IPR003601, IPR023405, IPR003602, IPR013498, IPR013498, IPR013498, IPR013826, IPR013497, IPR013497, IPR013497, IPR013497, IPR013497, IPR006171, IPR034149, IPR013824, IPR006171	DNA topoisomerase, type IA, central, DNA topoisomerase, type IA, central, TOPRIM domain, DNA topoisomerase, type IA, central region, subdomain 2, DNA topoisomerase, type IA, active site, DNA topoisomerase, type IA, DNA topoisomerase I, bacterial-type, DNA topoisomerase I, type IA, DNA topoisomerase, type IA, domain 2, DNA topoisomerase, type IA, core domain, DNA topoisomerase, type IA, DNA-bindin…	GO:0003677, GO:0003916, GO:0006265, GO:0003677, GO:0003916, GO:0006265, GO:0003917, GO:0003677, GO:0003917, GO:0006265, GO:0003677, GO:0003917, GO:0006265, GO:0003677, GO:0003916, GO:0006265, GO:0003677, GO:0003916, GO:0006265, GO:0003677, GO:0003916, GO:0006265, GO:0003677, GO:0003916, GO:0005694, GO:0006265, GO:0003677, GO:0003916, GO:0005694, GO:0006265, GO:0003677, GO:0003916, GO:0005694, GO:…	Reactome: R-HSA-5685938|Reactome: R-HSA-5685942|Reactome: R-HSA-5693554|Reactome: R-HSA-5693568|Reactome: R-HSA-5693579|Reactome: R-HSA-5693607|Reactome: R-HSA-5693616|Reactome: R-HSA-6804756|Reactome: R-HSA-69473|Reactome: R-HSA-912446, Reactome: R-HSA-5685938|Reactome: R-HSA-5685942|Reactome: R-HSA-5693554|Reactome: R-HSA-5693568|Reactome: R-HSA-5693579|Reactome: R-HSA-5693607|Reactome: R-HSA-5…
NC_008261.1_142_350	195103.CPF_1957	1.9e-203	714.9	Clostridiaceae	dprA			ko:K04096					ko00000				Bacteria	1TPP7@1239,24AS2@186801,36EJZ@31979,COG0758@1,COG0758@2	NA|NA|NA	LU	DNA protecting protein DprA	TIGRFAM, Pfam, SUPERFAMILY, Gene3D, PANTHER	TIGR00732, PF02481, SSF102405, G3DSA:3.40.50.450, PTHR43022	dprA: DNA protecting protein DprA, DNA recombination-mediator protein A	IPR003488, IPR003488, IPR003488	DNA recombination-mediator protein A, DNA recombination-mediator protein A, DNA recombination-mediator protein A	GO:0009294, GO:0009294, GO:0009294
NC_008261.1_142_351	195103.CPF_1958	2.1e-285	987.6	Clostridiaceae	comM			ko:K07391					ko00000				Bacteria	1TPPB@1239,248T8@186801,36EFG@31979,COG0606@1,COG0606@2	NA|NA|NA	O	magnesium chelatase	SUPERFAMILY, Gene3D, Pfam, Pfam, Gene3D, Pfam, CDD, PANTHER, SUPERFAMILY, ProSitePatterns, TIGRFAM, PANTHER, Coils, SMART	SSF54211, G3DSA:3.30.230.10, PF13335, PF01078, G3DSA:3.40.50.300, PF13541, cd00009, PTHR32039:SF7, SSF52540, PS00676, TIGR00368, PTHR32039, Coil, SM00382	Magnesium chelatase, subunit ChlI C-terminal, Magnesium chelatase, subunit ChlI, Subunit ChlI of Mg-chelatase, AAA, Sigma-54 interaction domain ATP-binding region B signature., TIGR00368: Mg chelatase-like protein	IPR020568, IPR014721, IPR025158, IPR000523, IPR004482, IPR027417, IPR025943, IPR004482, IPR003593	Ribosomal protein S5 domain 2-type fold, Ribosomal protein S5 domain 2-type fold, subgroup, Mg chelatase-related protein, C-terminal domain, Magnesium chelatase ChlI domain, Mg chelatase-related protein, P-loop containing nucleoside triphosphate hydrolase, Sigma-54 interaction domain, ATP-binding site 2, Mg chelatase-related protein, AAA+ ATPase domain
NC_008261.1_142_352	195103.CPF_1959	2e-61	241.5	Clostridiaceae	yraN			ko:K07460					ko00000				Bacteria	1VFHQ@1239,24QNK@186801,36MV2@31979,COG0792@1,COG0792@2	NA|NA|NA	L	Belongs to the UPF0102 family	Pfam, Gene3D, PANTHER, Hamap, SUPERFAMILY, TIGRFAM	PF02021, G3DSA:3.40.1350.10, PTHR34039, MF_00048, SSF52980, TIGR00252	Uncharacterised protein family UPF0102, UPF0102 protein YraN [yraN]., TIGR00252: TIGR00252 family protein	IPR003509, IPR011856, IPR003509, IPR003509, IPR011335, IPR003509	Uncharacterised protein family UPF0102, tRNA endonuclease-like domain superfamily, Uncharacterised protein family UPF0102, Uncharacterised protein family UPF0102, Restriction endonuclease type II-like, Uncharacterised protein family UPF0102	GO:0003676, GO:0004518	Reactome: R-HSA-6783310
NC_008261.1_142_353	195103.CPF_1960	5.8e-149	533.5	Clostridiaceae	rnhB	GO:0003674,GO:0003824,GO:0004518,GO:0004519,GO:0004521,GO:0004523,GO:0004540,GO:0005575,GO:0005622,GO:0005623,GO:0006139,GO:0006259,GO:0006260,GO:0006261,GO:0006271,GO:0006273,GO:0006281,GO:0006298,GO:0006401,GO:0006725,GO:0006807,GO:0006950,GO:0006974,GO:0008150,GO:0008152,GO:0009056,GO:0009057,GO:0009058,GO:0009059,GO:0009987,GO:0016070,GO:0016787,GO:0016788,GO:0016891,GO:0016893,GO:0019439,GO:…	3.1.26.4	ko:K03470	ko03030,map03030				ko00000,ko00001,ko01000,ko03032				Bacteria	1V1D6@1239,248IT@186801,36DHX@31979,COG0164@1,COG0164@2	NA|NA|NA	L	Endonuclease that specifically degrades the RNA of RNA- DNA hybrids	Pfam, SUPERFAMILY, CDD, Coils, Coils, PANTHER, Gene3D, PANTHER, Hamap	PF01351, SSF53098, cd07182, Coil, Coil, PTHR10954, G3DSA:3.30.420.10, PTHR10954:SF18, MF_00052_B	Ribonuclease HII, RNase_HII_bacteria_HII_like, Ribonuclease HII [rnhB].	IPR024567, IPR012337, IPR022898, IPR001352, IPR036397, IPR022898, IPR022898	Ribonuclease HII/HIII domain, Ribonuclease H-like superfamily, Ribonuclease HII, Ribonuclease HII/HIII, Ribonuclease H superfamily, Ribonuclease HII, Ribonuclease HII	GO:0004523, GO:0003723, GO:0004523, GO:0003676, GO:0004523, GO:0004523
NC_008261.1_142_354	195103.CPF_1961	6.6e-156	556.6	Clostridiaceae	ylqF	GO:0003674,GO:0003824,GO:0003924,GO:0008150,GO:0016462,GO:0016787,GO:0016817,GO:0016818,GO:0017111,GO:0022613,GO:0042254,GO:0044085,GO:0071840		ko:K14540					ko00000,ko03009				Bacteria	1TQGK@1239,2490H@186801,36DQN@31979,COG1161@1,COG1161@2	NA|NA|NA	S	Required for a late step of 50S ribosomal subunit assembly. Has GTPase activity	Gene3D, Pfam, TIGRFAM, PANTHER, PANTHER, Gene3D, ProSiteProfiles, SUPERFAMILY, PIRSF, CDD	G3DSA:3.40.50.300, PF01926, TIGR03596, PTHR11089:SF4, PTHR11089, G3DSA:1.10.1580.10, PS51721, SSF52540, PIRSF006230, cd01856	50S ribosome-binding GTPase, GTPase_YlqF: ribosome biogenesis GTP-binding protein YlqF, Circularly permuted (CP)-type guanine nucleotide-binding (G) domain profile., YlqF	IPR006073, IPR019991, IPR023179, IPR030378, IPR027417, IPR016478	GTP binding domain, GTP-binding protein, ribosome biogenesis, GTP-binding protein, orthogonal bundle domain superfamily, Circularly permuted (CP)-type guanine nucleotide-binding (G) domain, P-loop containing nucleoside triphosphate hydrolase, GTPase, MTG1	GO:0005525, GO:0005525
NC_008261.1_142_355	195103.CPF_1962	3.2e-56	224.2	Clostridiaceae	rplS	GO:0000027,GO:0003674,GO:0003676,GO:0003723,GO:0003735,GO:0005198,GO:0005488,GO:0005575,GO:0005622,GO:0005623,GO:0005737,GO:0005829,GO:0005840,GO:0005886,GO:0006412,GO:0006518,GO:0006807,GO:0006996,GO:0008150,GO:0008152,GO:0009058,GO:0009059,GO:0009987,GO:0010467,GO:0015934,GO:0016020,GO:0016043,GO:0019538,GO:0019843,GO:0022607,GO:0022613,GO:0022618,GO:0022625,GO:0022626,GO:0032991,GO:0034622,GO:…		ko:K02884	ko03010,map03010	M00178			br01610,ko00000,ko00001,ko00002,ko03011				Bacteria	1V6FT@1239,24J83@186801,36JJ4@31979,COG0335@1,COG0335@2	NA|NA|NA	J	This protein is located at the 30S-50S ribosomal subunit interface and may play a role in the structure and function of the aminoacyl-tRNA binding site	Hamap, PRINTS, PRINTS, PRINTS, PIRSF, SUPERFAMILY, Gene3D, TIGRFAM, PANTHER, ProSitePatterns, Pfam	MF_00402, PR00061, PR00061, PR00061, PIRSF002191, SSF50104, G3DSA:2.30.30.790, TIGR01024, PTHR15680, PS01015, PF01245	50S ribosomal protein L19 [rplS]., Ribosomal protein L19 signature, Ribosomal protein L19 signature, Ribosomal protein L19 signature, rplS_bact: ribosomal protein bL19, Ribosomal protein L19 signature., Ribosomal protein L19	IPR001857, IPR001857, IPR001857, IPR001857, IPR001857, IPR008991, IPR038657, IPR001857, IPR001857, IPR018257, IPR001857	Ribosomal protein L19, Ribosomal protein L19, Ribosomal protein L19, Ribosomal protein L19, Ribosomal protein L19, Translation protein SH3-like domain superfamily, Ribosomal protein L19 superfamily, Ribosomal protein L19, Ribosomal protein L19, Ribosomal protein L19, conserved site, Ribosomal protein L19	GO:0003735, GO:0005622, GO:0005840, GO:0006412, GO:0003735, GO:0005622, GO:0005840, GO:0006412, GO:0003735, GO:0005622, GO:0005840, GO:0006412, GO:0003735, GO:0005622, GO:0005840, GO:0006412, GO:0003735, GO:0005622, GO:0005840, GO:0006412, GO:0003735, GO:0005622, GO:0005840, GO:0006412, GO:0003735, GO:0005622, GO:0005840, GO:0006412, GO:0003735, GO:0005622, GO:0005840, GO:0006412, GO:0003735, GO:…	Reactome: R-HSA-5368286|Reactome: R-HSA-5389840|Reactome: R-HSA-5419276, Reactome: R-HSA-5368286|Reactome: R-HSA-5389840|Reactome: R-HSA-5419276, Reactome: R-HSA-5368286|Reactome: R-HSA-5389840|Reactome: R-HSA-5419276, Reactome: R-HSA-5368286|Reactome: R-HSA-5389840|Reactome: R-HSA-5419276, Reactome: R-HSA-5368286|Reactome: R-HSA-5389840|Reactome: R-HSA-5419276, Reactome: R-HSA-5368286|Reactome: …
NC_008261.1_142_356	195103.CPF_1963	1.6e-131	475.3	Clostridiaceae	trmD	GO:0000287,GO:0001510,GO:0002939,GO:0003674,GO:0003824,GO:0005488,GO:0005515,GO:0005575,GO:0005622,GO:0005623,GO:0005737,GO:0005829,GO:0006139,GO:0006396,GO:0006399,GO:0006400,GO:0006725,GO:0006807,GO:0008033,GO:0008150,GO:0008152,GO:0008168,GO:0008173,GO:0008175,GO:0008757,GO:0009019,GO:0009451,GO:0009987,GO:0010467,GO:0016070,GO:0016423,GO:0016740,GO:0016741,GO:0016772,GO:0016779,GO:0030488,GO:…	2.1.1.228,4.6.1.12	ko:K00554,ko:K01770	ko00900,ko01100,ko01110,ko01130,map00900,map01100,map01110,map01130	M00096	R00597,R05637	RC00002,RC00003,RC00334,RC01440	ko00000,ko00001,ko00002,ko01000,ko03016				Bacteria	1TPBV@1239,247JF@186801,36EJ7@31979,COG0336@1,COG0336@2	NA|NA|NA	J	Belongs to the RNA methyltransferase TrmD family	PANTHER, SUPERFAMILY, Hamap, PIRSF, Gene3D, Gene3D, PANTHER, Pfam, TIGRFAM	PTHR32125, SSF75217, MF_00605, PIRSF000386, G3DSA:1.10.1270.20, G3DSA:3.40.1280.10, PTHR32125:SF1, PF01746, TIGR00088	tRNA (guanine-N(1)-)-methyltransferase [trmD]., tRNA (Guanine-1)-methyltransferase, trmD: tRNA (guanine(37)-N(1))-methyltransferase	IPR029028, IPR002649, IPR002649, IPR023148, IPR029026, IPR002649, IPR016009, IPR002649	Alpha/beta knot methyltransferases, tRNA (guanine-N1-)-methyltransferase, bacteria, tRNA (guanine-N1-)-methyltransferase, bacteria, tRNA (guanine-N1-)-methyltransferase, C-terminal, tRNA (guanine-N1-)-methyltransferase, N-terminal, tRNA (guanine-N1-)-methyltransferase, bacteria, tRNA methyltransferase TRMD/TRM10-type domain, tRNA (guanine-N1-)-methyltransferase, bacteria	GO:0008033, GO:0052906, GO:0008033, GO:0052906, GO:0008033, GO:0052906, GO:0008033, GO:0052906, GO:0008033, GO:0052906	MetaCyc: PWY-6829|MetaCyc: PWY-7285|MetaCyc: PWY-7286, MetaCyc: PWY-6829|MetaCyc: PWY-7285|MetaCyc: PWY-7286, MetaCyc: PWY-6829|MetaCyc: PWY-7285|MetaCyc: PWY-7286, MetaCyc: PWY-6829|MetaCyc: PWY-7285|MetaCyc: PWY-7286, MetaCyc: PWY-6829|MetaCyc: PWY-7285|MetaCyc: PWY-7286, MetaCyc: PWY-6829|MetaCyc: PWY-7285|MetaCyc: PWY-7286
NC_008261.1_142_357	195103.CPF_1964	1.2e-85	322.4	Clostridiaceae	rimM	GO:0000028,GO:0005575,GO:0005622,GO:0005623,GO:0005737,GO:0005829,GO:0006139,GO:0006364,GO:0006396,GO:0006725,GO:0006807,GO:0006996,GO:0008150,GO:0008152,GO:0009987,GO:0010467,GO:0016043,GO:0016070,GO:0016072,GO:0022607,GO:0022613,GO:0022618,GO:0030490,GO:0034470,GO:0034622,GO:0034641,GO:0034660,GO:0040007,GO:0042254,GO:0042255,GO:0042274,GO:0043170,GO:0043933,GO:0044085,GO:0044237,GO:0044238,GO:…		ko:K02860					ko00000,ko03009				Bacteria	1V6HD@1239,24I1G@186801,36IPC@31979,COG0806@1,COG0806@2	NA|NA|NA	J	An accessory protein needed during the final step in the assembly of 30S ribosomal subunit, possibly for assembly of the head region. Probably interacts with S19. Essential for efficient processing of 16S rRNA. May be needed both before and after RbfA during the maturation of 16S rRNA. It has affinity for free ribosomal 30S subunits but not for 70S ribosomes	TIGRFAM, Pfam, Hamap, Gene3D, PANTHER, SUPERFAMILY, Pfam, Gene3D, SUPERFAMILY	TIGR02273, PF05239, MF_00014, G3DSA:2.40.30.60, PTHR33692, SSF50447, PF01782, G3DSA:2.30.30.240, SSF50346	16S_RimM: 16S rRNA processing protein RimM, PRC-barrel domain, Ribosome maturation factor RimM [rimM]., RimM N-terminal domain	IPR011961, IPR027275, IPR011961, IPR036976, IPR009000, IPR002676, IPR011033	16S rRNA processing protein RimM, PRC-barrel domain, 16S rRNA processing protein RimM, RimM, N-terminal domain superfamily, Translation protein, beta-barrel domain superfamily, RimM, N-terminal, PRC-barrel-like superfamily	GO:0005840, GO:0006364, GO:0043022, GO:0005840, GO:0006364, GO:0043022, GO:0006364, GO:0006364
NC_008261.1_142_358	195103.CPF_1965	1.8e-28	131.3	Clostridiaceae				ko:K06960					ko00000				Bacteria	1VEG7@1239,24QKN@186801,36KGX@31979,COG1837@1,COG1837@2	NA|NA|NA	S	Belongs to the UPF0109 family	SUPERFAMILY, PANTHER, Gene3D, Hamap, ProSiteProfiles, Pfam	SSF54814, PTHR34654, G3DSA:3.30.300.20, MF_00088, PS50084, PF13083	UPF0109 protein <locus_tag>., Type-1 KH domain profile., KH domain	IPR009019, IPR020627, IPR015946, IPR020627	K homology domain superfamily, prokaryotic type, Uncharacterised protein family UPF0109, K homology domain-like, alpha/beta, Uncharacterised protein family UPF0109	GO:0003723
NC_008261.1_142_359	195103.CPF_1966	2.8e-38	164.1	Clostridiaceae	rpsP	GO:0000028,GO:0000217,GO:0000400,GO:0003674,GO:0003676,GO:0003677,GO:0003735,GO:0003824,GO:0004518,GO:0004519,GO:0004520,GO:0004536,GO:0005198,GO:0005488,GO:0005575,GO:0005622,GO:0005623,GO:0005737,GO:0005829,GO:0005840,GO:0006139,GO:0006259,GO:0006412,GO:0006518,GO:0006725,GO:0006807,GO:0006996,GO:0008150,GO:0008152,GO:0009058,GO:0009059,GO:0009987,GO:0010467,GO:0015935,GO:0016043,GO:0016787,GO:…		ko:K02959	ko03010,map03010	M00178			br01610,ko00000,ko00001,ko00002,ko03011,ko03029				Bacteria	1VA0X@1239,24MND@186801,36KP2@31979,COG0228@1,COG0228@2	NA|NA|NA	J	Belongs to the bacterial ribosomal protein bS16 family	TIGRFAM, Hamap, PANTHER, Pfam, SUPERFAMILY, PANTHER, Gene3D	TIGR00002, MF_00385, PTHR12919, PF00886, SSF54565, PTHR12919:SF20, G3DSA:3.30.1320.10	S16: ribosomal protein bS16, 30S ribosomal protein S16 [rpsP]., Ribosomal protein S16	IPR000307, IPR000307, IPR000307, IPR000307, IPR023803, IPR023803	Ribosomal protein S16, Ribosomal protein S16, Ribosomal protein S16, Ribosomal protein S16, Ribosomal protein S16 domain superfamily, Ribosomal protein S16 domain superfamily	GO:0003735, GO:0005622, GO:0005840, GO:0006412, GO:0003735, GO:0005622, GO:0005840, GO:0006412, GO:0003735, GO:0005622, GO:0005840, GO:0006412, GO:0003735, GO:0005622, GO:0005840, GO:0006412	Reactome: R-HSA-5368286|Reactome: R-HSA-5389840|Reactome: R-HSA-5419276, Reactome: R-HSA-5368286|Reactome: R-HSA-5389840|Reactome: R-HSA-5419276, Reactome: R-HSA-5368286|Reactome: R-HSA-5389840|Reactome: R-HSA-5419276, Reactome: R-HSA-5368286|Reactome: R-HSA-5389840|Reactome: R-HSA-5419276, Reactome: R-HSA-5368286|Reactome: R-HSA-5389840|Reactome: R-HSA-5419276, Reactome: R-HSA-5368286|Reactome: …
NC_008261.1_142_360	195103.CPF_1967	2e-242	844.7	Clostridiaceae	ffh	GO:0005575,GO:0005618,GO:0005623,GO:0005886,GO:0008150,GO:0016020,GO:0030312,GO:0040007,GO:0044464,GO:0071944	3.6.5.4	ko:K03106	ko02024,ko03060,ko03070,map02024,map03060,map03070	M00335			ko00000,ko00001,ko00002,ko01000,ko02044	3.A.5.1,3.A.5.2,3.A.5.7,3.A.5.8,3.A.5.9			Bacteria	1TP06@1239,248EU@186801,36E8W@31979,COG0541@1,COG0541@2	NA|NA|NA	U	Involved in targeting and insertion of nascent membrane proteins into the cytoplasmic membrane. Binds to the hydrophobic signal sequence of the ribosome-nascent chain (RNC) as it emerges from the ribosomes. The SRP-RNC complex is then targeted to the cytoplasmic membrane where it interacts with the SRP receptor FtsY	Pfam, Gene3D, Gene3D, Pfam, SUPERFAMILY, PANTHER, Coils, PANTHER, Pfam, SMART, SUPERFAMILY, CDD, SMART, SMART, TIGRFAM, Hamap, ProSitePatterns, Gene3D	PF02881, G3DSA:1.10.260.30, G3DSA:1.20.120.140, PF00448, SSF47446, PTHR11564, Coil, PTHR11564:SF7, PF02978, SM00962, SSF52540, cd03115, SM00963, SM00382, TIGR00959, MF_00306, PS00300, G3DSA:3.40.50.300	SRP54-type protein, helical bundle domain, SRP54-type protein, GTPase domain, Signal peptide binding domain, SRP, ffh: signal recognition particle protein, Signal recognition particle 54 kDa protein [srp54]., SRP54-type proteins GTP-binding domain signature.	IPR013822, IPR036891, IPR000897, IPR036891, IPR022941, IPR004780, IPR004125, IPR000897, IPR027417, IPR013822, IPR003593, IPR004780, IPR022941, IPR000897	Signal recognition particle, SRP54 subunit, helical bundle, Signal recognition particle, SRP54 subunit, M-domain superfamily, Signal recognition particle, SRP54 subunit, GTPase domain, Signal recognition particle, SRP54 subunit, M-domain superfamily, Signal recognition particle, SRP54 subunit, Signal recognition particle protein Ffh, Signal recognition particle, SRP54 subunit, M-domain, Signal re…	GO:0005525, GO:0006614, GO:0006614, GO:0008312, GO:0048500, GO:0005525, GO:0006614, GO:0006614, GO:0008312, GO:0048500, GO:0003924, GO:0005525, GO:0006614, GO:0048500, GO:0003924, GO:0005525, GO:0006614, GO:0048500, GO:0006614, GO:0008312, GO:0048500, GO:0005525, GO:0006614, GO:0005525, GO:0006614, GO:0003924, GO:0005525, GO:0006614, GO:0048500, GO:0003924, GO:0005525, GO:0006614, GO:0048500, GO:…	Reactome: R-HSA-1799339, Reactome: R-HSA-1799339, Reactome: R-HSA-1799339, Reactome: R-HSA-1799339, Reactome: R-HSA-1799339, Reactome: R-HSA-1799339, Reactome: R-HSA-1799339, Reactome: R-HSA-1799339, Reactome: R-HSA-1799339, Reactome: R-HSA-1799339
NC_008261.1_142_361	195103.CPF_1968	1.3e-49	202.2	Clostridiaceae	ylxM	GO:0003674,GO:0008150,GO:0030234,GO:0030695,GO:0050790,GO:0060589,GO:0065007,GO:0065009,GO:0098772		ko:K09787					ko00000				Bacteria	1VEGP@1239,24QNM@186801,36MJ0@31979,COG2739@1,COG2739@2	NA|NA|NA	S	Might take part in the signal recognition particle (SRP) pathway. This is inferred from the conservation of its genetic proximity to ftsY ffh. May be a regulatory protein	Gene3D, Pfam, PANTHER, SUPERFAMILY, Hamap	G3DSA:1.10.10.10, PF04297, PTHR40083, SSF88659, MF_00245	Putative helix-turn-helix protein, YlxM / p13 like, UPF0122 protein <locus_tag>.	IPR036388, IPR007394, IPR007394, IPR013324, IPR007394	Winged helix-like DNA-binding domain superfamily, Putative helix-turn-helix protein, YlxM/p13-like, Putative helix-turn-helix protein, YlxM/p13-like, RNA polymerase sigma factor, region 3/4-like, Putative helix-turn-helix protein, YlxM/p13-like
NC_008261.1_142_362	195103.CPF_1969	2.9e-157	561.2	Clostridiaceae	ftsY			ko:K03110	ko02024,ko03060,ko03070,map02024,map03060,map03070	M00335			ko00000,ko00001,ko00002,ko02044	3.A.5.1,3.A.5.2,3.A.5.7			Bacteria	1TPRI@1239,247JD@186801,36EQQ@31979,COG0552@1,COG0552@2	NA|NA|NA	U	Involved in targeting and insertion of nascent membrane proteins into the cytoplasmic membrane. Acts as a receptor for the complex formed by the signal recognition particle (SRP) and the ribosome-nascent chain (RNC)	SMART, PANTHER, Pfam, Hamap, Gene3D, SMART, ProSitePatterns, TIGRFAM, Gene3D, SMART, Pfam, SUPERFAMILY, SUPERFAMILY, PANTHER	SM00962, PTHR43134, PF00448, MF_00920, G3DSA:3.40.50.300, SM00963, PS00300, TIGR00064, G3DSA:1.20.120.140, SM00382, PF02881, SSF47364, SSF52540, PTHR43134:SF2	SRP54-type protein, GTPase domain, Signal recognition particle receptor FtsY [ftsY]., SRP54-type proteins GTP-binding domain signature., ftsY: signal recognition particle-docking protein FtsY, SRP54-type protein, helical bundle domain	IPR000897, IPR000897, IPR004390, IPR013822, IPR000897, IPR004390, IPR003593, IPR013822, IPR036225, IPR027417, IPR004390	Signal recognition particle, SRP54 subunit, GTPase domain, Signal recognition particle, SRP54 subunit, GTPase domain, Signal-recognition particle receptor FtsY, Signal recognition particle, SRP54 subunit, helical bundle, Signal recognition particle, SRP54 subunit, GTPase domain, Signal-recognition particle receptor FtsY, AAA+ ATPase domain, Signal recognition particle, SRP54 subunit, helical bund…	GO:0005525, GO:0006614, GO:0005525, GO:0006614, GO:0006614, GO:0005525, GO:0006614, GO:0005525, GO:0006614, GO:0006614, GO:0005525, GO:0006614, GO:0006614	Reactome: R-HSA-1799339, Reactome: R-HSA-1799339, Reactome: R-HSA-1799339, Reactome: R-HSA-1799339, Reactome: R-HSA-1799339, Reactome: R-HSA-1799339
NC_008261.1_142_363	195103.CPF_1970	0	1423.3	Clostridiaceae	smc			ko:K03529					ko00000,ko03036				Bacteria	1TPJV@1239,249F4@186801,36ECC@31979,COG1196@1,COG1196@2	NA|NA|NA	D	Required for chromosome condensation and partitioning	SUPERFAMILY, Coils, PANTHER, Coils, Coils, Coils, PIRSF, Coils, Coils, SMART, CDD, Coils, Coils, Pfam, Gene3D, Coils, Coils, Coils, Gene3D, Gene3D, CDD, SUPERFAMILY, Pfam, Gene3D, Hamap, TIGRFAM	SSF75553, Coil, PTHR43941, Coil, Coil, Coil, PIRSF005719, Coil, Coil, SM00968, cd03278, Coil, Coil, PF06470, G3DSA:3.40.50.300, Coil, Coil, Coil, G3DSA:1.20.1060.20, G3DSA:3.40.50.300, cd03278, SSF52540, PF02463, G3DSA:3.30.70.1620, MF_01894, TIGR02168	ABC_SMC_barmotin, SMC proteins Flexible Hinge Domain, ABC_SMC_barmotin, RecF/RecN/SMC N terminal domain, Chromosome partition protein Smc [smc]., SMC_prok_B: chromosome segregation protein SMC	IPR036277, IPR024704, IPR010935, IPR010935, IPR027417, IPR003395, IPR011890, IPR011890	SMCs flexible hinge superfamily, Structural maintenance of chromosomes protein, SMCs flexible hinge, SMCs flexible hinge, P-loop containing nucleoside triphosphate hydrolase, RecF/RecN/SMC, N-terminal, Structural maintenance of chromosomes protein, prokaryotic, Structural maintenance of chromosomes protein, prokaryotic	GO:0005515, GO:0005524, GO:0005694, GO:0051276, GO:0005515, GO:0005524, GO:0005694, GO:0051276, GO:0005515, GO:0005524, GO:0005694, GO:0051276, GO:0007062, GO:0030261, GO:0007062, GO:0030261
NC_008261.1_142_365	195103.CPF_1971	3.2e-203	714.1	Clostridiaceae			2.3.1.48	ko:K07739					ko00000,ko01000,ko03016,ko03036				Bacteria	1TS1F@1239,248YV@186801,36DYS@31979,COG1243@1,COG1243@2	NA|NA|NA	BK	Radical SAM	PANTHER, SUPERFAMILY, PANTHER, SFLD, SFLD, SFLD, Gene3D, Pfam, CDD, SMART, Pfam	PTHR11135, SSF102114, PTHR11135:SF0, SFLDS00029, SFLDG01082, SFLDG01086, G3DSA:3.80.30.20, PF16199, cd01335, SM00729, PF04055	Radical SAM, B12-binding domain containing, elongater protein-like, Radical_SAM C-terminal domain, Radical_SAM, Radical SAM superfamily	IPR039661, IPR034687, IPR007197, IPR039661, IPR023404, IPR032432, IPR006638, IPR007197	ELP3/YhcC, Elongator complex protein 3-like, Radical SAM, ELP3/YhcC, Radical SAM, alpha/beta horseshoe, Radical SAM, C-terminal extension, Elp3/MiaB/NifB, Radical SAM	GO:0003824, GO:0051536, GO:0003824, GO:0051536, GO:0003824, GO:0051536	Reactome: R-HSA-3214847, Reactome: R-HSA-3214847, Reactome: R-HSA-3214847, Reactome: R-HSA-3214847
NC_008261.1_142_366	195103.CPF_1972	2.4e-127	461.5	Clostridiaceae	rnc		3.1.26.3	ko:K03685	ko03008,ko05205,map03008,map05205				ko00000,ko00001,ko01000,ko03009,ko03019,ko03036				Bacteria	1TPGC@1239,249QD@186801,36FEP@31979,COG0571@1,COG0571@2	NA|NA|NA	J	Digests double-stranded RNA. Involved in the processing of primary rRNA transcript to yield the immediate precursors to the large and small rRNAs (23S and 16S). Processes some mRNAs, and tRNAs when they are encoded in the rRNA operon. Processes pre- crRNA and tracrRNA of type II CRISPR loci if present in the organism	CDD, SUPERFAMILY, ProSitePatterns, TIGRFAM, CDD, SMART, Pfam, Pfam, ProSiteProfiles, Hamap, ProSiteProfiles, Gene3D, SUPERFAMILY, Gene3D, SMART, PANTHER	cd00048, SSF54768, PS00517, TIGR02191, cd00593, SM00358, PF14622, PF00035, PS50137, MF_00104, PS50142, G3DSA:1.10.1520.10, SSF69065, G3DSA:3.30.160.20, SM00535, PTHR14950	DSRM, Ribonuclease III family signature., RNaseIII: ribonuclease III, RIBOc, Ribonuclease-III-like, Double-stranded RNA binding motif, Double stranded RNA-binding domain (dsRBD) profile., Ribonuclease 3 [rnc]., Ribonuclease III family domain profile.	IPR014720, IPR000999, IPR011907, IPR000999, IPR014720, IPR000999, IPR014720, IPR014720, IPR011907, IPR000999, IPR036389, IPR036389, IPR000999	Double-stranded RNA-binding domain, Ribonuclease III domain, Ribonuclease III, Ribonuclease III domain, Double-stranded RNA-binding domain, Ribonuclease III domain, Double-stranded RNA-binding domain, Double-stranded RNA-binding domain, Ribonuclease III, Ribonuclease III domain, Ribonuclease III, endonuclease domain superfamily, Ribonuclease III, endonuclease domain superfamily, Ribonuclease III …	GO:0004525, GO:0006396, GO:0003723, GO:0004525, GO:0016075, GO:0004525, GO:0006396, GO:0004525, GO:0006396, GO:0003723, GO:0004525, GO:0016075, GO:0004525, GO:0006396, GO:0004525, GO:0006396, GO:0004525, GO:0006396, GO:0004525, GO:0006396	Reactome: R-HSA-203927, Reactome: R-HSA-203927, Reactome: R-HSA-203927, Reactome: R-HSA-203927, Reactome: R-HSA-203927, Reactome: R-HSA-203927, Reactome: R-HSA-203927
NC_008261.1_142_367	195103.CPF_1973	8.9e-31	139	Clostridiaceae	acpP			ko:K02078					ko00000,ko00001				Bacteria	1VEE3@1239,24QME@186801,36MIP@31979,COG0236@1,COG0236@2	NA|NA|NA	IQ	Carrier of the growing fatty acid chain in fatty acid biosynthesis	TIGRFAM, PANTHER, Gene3D, SUPERFAMILY, ProSitePatterns, Hamap, Pfam, ProSiteProfiles, PANTHER	TIGR00517, PTHR20863, G3DSA:1.10.1200.10, SSF47336, PS00012, MF_01217, PF00550, PS50075, PTHR20863:SF28	acyl_carrier: acyl carrier protein, Phosphopantetheine attachment site., Acyl carrier protein [acpP]., Phosphopantetheine attachment site, Carrier protein (CP) domain profile.	IPR003231, IPR036736, IPR036736, IPR006162, IPR003231, IPR009081, IPR009081	Acyl carrier protein (ACP), ACP-like superfamily, ACP-like superfamily, Phosphopantetheine attachment site, Acyl carrier protein (ACP), Phosphopantetheine binding ACP domain, Phosphopantetheine binding ACP domain	GO:0006633, GO:0006633	Reactome: R-HSA-389661|Reactome: R-HSA-611105|Reactome: R-HSA-6799198|Reactome: R-HSA-77289, Reactome: R-HSA-389661|Reactome: R-HSA-611105|Reactome: R-HSA-6799198|Reactome: R-HSA-77289
NC_008261.1_142_368	195103.CPF_1974	3.1e-184	651	Clostridiaceae	plsX		2.3.1.15	ko:K03621	ko00561,ko00564,ko01100,ko01110,map00561,map00564,map01100,map01110	M00089	R00851,R09380	RC00004,RC00039,RC00041	ko00000,ko00001,ko00002,ko01000,ko01004				Bacteria	1TPXS@1239,247KW@186801,36E96@31979,COG0416@1,COG0416@2	NA|NA|NA	I	Catalyzes the reversible formation of acyl-phosphate (acyl-PO(4)) from acyl- acyl-carrier-protein (acyl-ACP). This enzyme utilizes acyl-ACP as fatty acyl donor, but not acyl-CoA	Gene3D, Hamap, PANTHER, TIGRFAM, SUPERFAMILY, PIRSF, Pfam	G3DSA:3.40.718.10, MF_00019, PTHR30100, TIGR00182, SSF53659, PIRSF002465, PF02504	Phosphate acyltransferase [plsX]., plsX: fatty acid/phospholipid synthesis protein PlsX, Fatty acid synthesis protein	IPR012281, IPR012281, IPR012281, IPR012281, IPR003664	Phospholipid biosynthesis protein, PlsX-like, Phospholipid biosynthesis protein, PlsX-like, Phospholipid biosynthesis protein, PlsX-like, Phospholipid biosynthesis protein, PlsX-like, Fatty acid synthesis PlsX protein	GO:0006633, GO:0006633, GO:0006633, GO:0006633, GO:0003824, GO:0006633, GO:0016747
NC_008261.1_142_369	195103.CPF_1975	3.3e-28	130.2	Clostridiaceae	rpmF	GO:0000027,GO:0000302,GO:0003674,GO:0003735,GO:0005198,GO:0005575,GO:0005622,GO:0005623,GO:0005737,GO:0005829,GO:0005840,GO:0006412,GO:0006518,GO:0006807,GO:0006950,GO:0006979,GO:0006996,GO:0008150,GO:0008152,GO:0009058,GO:0009059,GO:0009314,GO:0009628,GO:0009987,GO:0010467,GO:0015934,GO:0016043,GO:0019538,GO:0022607,GO:0022613,GO:0022618,GO:0022625,GO:0022626,GO:0032991,GO:0034622,GO:0034641,GO:…		ko:K02911	ko03010,map03010	M00178			br01610,ko00000,ko00001,ko00002,ko03011,ko03029				Bacteria	1VEFI@1239,24QM0@186801,36MII@31979,COG0333@1,COG0333@2	NA|NA|NA	J	Belongs to the bacterial ribosomal protein bL32 family	Hamap, Pfam, TIGRFAM, SUPERFAMILY	MF_00340, PF01783, TIGR01031, SSF57829	50S ribosomal protein L32 [rpmF]., Ribosomal L32p protein family, rpmF_bact: ribosomal protein bL32	IPR002677, IPR002677, IPR002677, IPR011332	Ribosomal protein L32p, Ribosomal protein L32p, Ribosomal protein L32p, Zinc-binding ribosomal protein	GO:0003735, GO:0006412, GO:0015934, GO:0003735, GO:0006412, GO:0015934, GO:0003735, GO:0006412, GO:0015934, GO:0006412	Reactome: R-HSA-5368286|Reactome: R-HSA-5389840|Reactome: R-HSA-5419276, Reactome: R-HSA-5368286|Reactome: R-HSA-5389840|Reactome: R-HSA-5419276, Reactome: R-HSA-5368286|Reactome: R-HSA-5389840|Reactome: R-HSA-5419276
NC_008261.1_142_370	195103.CPF_1976	4.8e-86	323.9	Clostridiaceae	yceD	GO:0005575,GO:0005622,GO:0005623,GO:0005737,GO:0005829,GO:0008150,GO:0040007,GO:0044424,GO:0044444,GO:0044464		ko:K07040					ko00000				Bacteria	1VEXU@1239,24RKT@186801,36JU8@31979,COG1399@1,COG1399@2	NA|NA|NA	S	Uncharacterized ACR, COG1399	PANTHER, Pfam	PTHR34374, PF02620	Uncharacterized ACR, COG1399	IPR003772	Large ribosomal RNA subunit accumulation protein YceD
NC_008261.1_142_371	195103.CPF_1977	3.7e-221	773.9	Clostridiaceae	ackA	GO:0005575,GO:0005622,GO:0005623,GO:0005737,GO:0044424,GO:0044464	2.7.2.1	ko:K00925	ko00430,ko00620,ko00640,ko00680,ko00720,ko01100,ko01120,ko01200,map00430,map00620,map00640,map00680,map00720,map01100,map01120,map01200	M00357,M00579	R00315,R01353	RC00002,RC00043	ko00000,ko00001,ko00002,ko01000			iNJ661.Rv0409	Bacteria	1TQ22@1239,248ZM@186801,36EE0@31979,COG0282@1,COG0282@2	NA|NA|NA	F	Catalyzes the formation of acetyl phosphate from acetate and ATP. Can also catalyze the reverse reaction	PIRSF, PANTHER, PRINTS, PRINTS, PRINTS, PRINTS, PRINTS, PRINTS, SUPERFAMILY, ProSitePatterns, ProSitePatterns, TIGRFAM, Gene3D, SUPERFAMILY, Hamap, Pfam, Gene3D, PANTHER	PIRSF000722, PTHR21060, PR00471, PR00471, PR00471, PR00471, PR00471, PR00471, SSF53067, PS01076, PS01075, TIGR00016, G3DSA:3.30.420.40, SSF53067, MF_00020, PF00871, G3DSA:3.30.420.40, PTHR21060:SF11	Acetate kinase family signature, Acetate kinase family signature, Acetate kinase family signature, Acetate kinase family signature, Acetate kinase family signature, Acetate kinase family signature, Acetate and butyrate kinases family signature 2., Acetate and butyrate kinases family signature 1., ackA: acetate kinase, Acetate kinase [ackA]., Acetokinase family	IPR004372, IPR000890, IPR000890, IPR000890, IPR000890, IPR000890, IPR000890, IPR000890, IPR023865, IPR023865, IPR004372, IPR004372, IPR000890	Acetate/propionate kinase, Aliphatic acid kinase, short-chain, Aliphatic acid kinase, short-chain, Aliphatic acid kinase, short-chain, Aliphatic acid kinase, short-chain, Aliphatic acid kinase, short-chain, Aliphatic acid kinase, short-chain, Aliphatic acid kinase, short-chain, Aliphatic acid kinase, short-chain, conserved site, Aliphatic acid kinase, short-chain, conserved site, Acetate/propiona…	GO:0006082, GO:0016301, GO:0016774, GO:0005622, GO:0016301, GO:0016310, GO:0016774, GO:0005622, GO:0016301, GO:0016310, GO:0016774, GO:0005622, GO:0016301, GO:0016310, GO:0016774, GO:0005622, GO:0016301, GO:0016310, GO:0016774, GO:0005622, GO:0016301, GO:0016310, GO:0016774, GO:0005622, GO:0016301, GO:0016310, GO:0016774, GO:0005622, GO:0016301, GO:0016310, GO:0016774, GO:0016301, GO:0016310, GO:…	KEGG: 00430+2.7.2.1|KEGG: 00620+2.7.2.1|KEGG: 00640+2.7.2.1|KEGG: 00680+2.7.2.1|KEGG: 00720+2.7.2.1|MetaCyc: PWY-5482|MetaCyc: PWY-5485|MetaCyc: PWY-5497, KEGG: 00430+2.7.2.1|KEGG: 00620+2.7.2.1|KEGG: 00640+2.7.2.1|KEGG: 00680+2.7.2.1|KEGG: 00720+2.7.2.1|MetaCyc: PWY-5482|MetaCyc: PWY-5485|MetaCyc: PWY-5497, KEGG: 00430+2.7.2.1|KEGG: 00620+2.7.2.1|KEGG: 00640+2.7.2.1|KEGG: 00680+2.7.2.1|KEGG: 007…
NC_008261.1_142_372	195103.CPF_1978	9.8e-183	646	Clostridiaceae	pta	GO:0006082,GO:0006083,GO:0008150,GO:0008152,GO:0009058,GO:0009987,GO:0016053,GO:0016999,GO:0017000,GO:0017144,GO:0019413,GO:0019752,GO:0032787,GO:0043436,GO:0044237,GO:0044249,GO:0044281,GO:0044283,GO:0046394,GO:0071704,GO:0072330,GO:1901576	2.3.1.19,2.3.1.8	ko:K00625,ko:K00634,ko:K13788	ko00430,ko00620,ko00640,ko00650,ko00680,ko00720,ko01100,ko01120,ko01200,map00430,map00620,map00640,map00650,map00680,map00720,map01100,map01120,map01200	M00357,M00579	R00230,R00921,R01174	RC00004,RC02746,RC02816	ko00000,ko00001,ko00002,ko01000			iAF987.Gmet_1035	Bacteria	1TPQ0@1239,247W9@186801,36DRX@31979,COG0280@1,COG0280@2	NA|NA|NA	C	phosphate acetyltransferase	PANTHER, Gene3D, PIRSF, Pfam, SUPERFAMILY, Gene3D, PANTHER, TIGRFAM	PTHR43356, G3DSA:3.40.50.10750, PIRSF000428, PF01515, SSF53659, G3DSA:3.40.50.10950, PTHR43356:SF3, TIGR00651	Phosphate acetyl/butaryl transferase, pta: phosphate acetyltransferase	IPR012147, IPR002505, IPR004614	Phosphate acetyl/butyryltransferase, Phosphate acetyl/butaryl transferase, Phosphate acetyltransferase	GO:0016746, GO:0016746, GO:0016407	KEGG: 00430+2.3.1.8|KEGG: 00620+2.3.1.8|KEGG: 00640+2.3.1.8|KEGG: 00680+2.3.1.8|KEGG: 00720+2.3.1.8|MetaCyc: PWY-1281|MetaCyc: PWY-5482|MetaCyc: PWY-5485|MetaCyc: PWY-5497|MetaCyc: PWY-6637, KEGG: 00430+2.3.1.8|KEGG: 00620+2.3.1.8|KEGG: 00640+2.3.1.8|KEGG: 00680+2.3.1.8|KEGG: 00720+2.3.1.8|MetaCyc: PWY-1281|MetaCyc: PWY-5482|MetaCyc: PWY-5485|MetaCyc: PWY-5497|MetaCyc: PWY-6637, KEGG: 00430+2.3.1…
NC_008261.1_142_373	195103.CPF_1979	2.8e-224	784.3	Clostridiaceae	ylbM												Bacteria	1TPP2@1239,247UP@186801,36DM0@31979,COG1323@1,COG1323@2	NA|NA|NA	S	Belongs to the UPF0348 family	Pfam, Hamap, Gene3D, SUPERFAMILY, PANTHER	PF05636, MF_01539, G3DSA:3.40.50.620, SSF52374, PTHR37825	HIGH Nucleotidyl Transferase, UPF0348 protein <locus_tag>.	IPR008513, IPR008513, IPR014729, IPR008513	Uncharacterised protein family UPF0348, Uncharacterised protein family UPF0348, Rossmann-like alpha/beta/alpha sandwich fold, Uncharacterised protein family UPF0348
NC_008261.1_142_374	195103.CPF_1981	2.1e-192	678.3	Clostridiaceae	ylbJ												Bacteria	1TR0V@1239,247XA@186801,36ESY@31979,COG3314@1,COG3314@2	NA|NA|NA	S	Sporulation integral membrane protein YlbJ	TIGRFAM	TIGR02871	spore_ylbJ: sporulation integral membrane protein YlbJ	IPR014226	Sporulation integral membrane protein YlbJ
NC_008261.1_142_375	195103.CPF_1980	4.2e-84	317.4	Clostridiaceae													Bacteria	1V97P@1239,24JGQ@186801,36INC@31979,COG0711@1,COG0711@2	NA|NA|NA	C	Psort location Cytoplasmic, score	PANTHER, Coils, Coils	PTHR38010, Coil, Coil
NC_008261.1_142_376	195103.CPF_1982	5.1e-84	317	Clostridiaceae	coaD	GO:0003674,GO:0003824,GO:0004595,GO:0005488,GO:0005515,GO:0006082,GO:0006139,GO:0006163,GO:0006164,GO:0006575,GO:0006725,GO:0006732,GO:0006753,GO:0006766,GO:0006767,GO:0006793,GO:0006796,GO:0006807,GO:0008150,GO:0008152,GO:0009058,GO:0009108,GO:0009110,GO:0009117,GO:0009150,GO:0009152,GO:0009165,GO:0009259,GO:0009260,GO:0009987,GO:0015936,GO:0015937,GO:0015939,GO:0015940,GO:0016053,GO:0016740,GO:…	2.7.7.3	ko:K00954	ko00770,ko01100,map00770,map01100	M00120	R03035	RC00002	ko00000,ko00001,ko00002,ko01000			iPC815.YPO0053,iSDY_1059.SDY_4064	Bacteria	1V3MR@1239,24HC3@186801,36IRH@31979,COG0669@1,COG0669@2	NA|NA|NA	H	Reversibly transfers an adenylyl group from ATP to 4- phosphopantetheine, yielding dephospho-CoA (dPCoA) and pyrophosphate	Hamap, TIGRFAM, SUPERFAMILY, PANTHER, ProDom, PANTHER, CDD, TIGRFAM, Gene3D, Pfam, PRINTS, PRINTS, PRINTS, PRINTS, PRINTS	MF_00151, TIGR01510, SSF52374, PTHR21342, PD016147, PTHR21342:SF1, cd02163, TIGR00125, G3DSA:3.40.50.620, PF01467, PR01020, PR01020, PR01020, PR01020, PR01020	Phosphopantetheine adenylyltransferase [coaD]., coaD_prev_kdtB: pantetheine-phosphate adenylyltransferase, LIGASE LYASE CITRATE PRO-3S-LYASE SYNTHETASE TRANSFERASE CYTIDYLTRANSFERASE-RELATED:CITRATE ACETATE:SH-CITRATE CITC PLASMID, PPAT, cyt_tran_rel: cytidyltransferase-like domain, Cytidylyltransferase-like, Lipopolysaccharide core biosynthesis protein signature, Lipopolysaccharide core biosynth…	IPR001980, IPR001980, IPR001980, IPR001980, IPR004821, IPR014729, IPR004821, IPR001980, IPR001980, IPR001980, IPR001980, IPR001980	Phosphopantetheine adenylyltransferase, Phosphopantetheine adenylyltransferase, Phosphopantetheine adenylyltransferase, Phosphopantetheine adenylyltransferase, Cytidyltransferase-like domain, Rossmann-like alpha/beta/alpha sandwich fold, Cytidyltransferase-like domain, Phosphopantetheine adenylyltransferase, Phosphopantetheine adenylyltransferase, Phosphopantetheine adenylyltransferase, Phosphopa…	GO:0004595, GO:0015937, GO:0004595, GO:0015937, GO:0004595, GO:0015937, GO:0004595, GO:0015937, GO:0003824, GO:0009058, GO:0003824, GO:0009058, GO:0004595, GO:0015937, GO:0004595, GO:0015937, GO:0004595, GO:0015937, GO:0004595, GO:0015937, GO:0004595, GO:0015937	KEGG: 00770+2.7.7.3|MetaCyc: PWY-7851, KEGG: 00770+2.7.7.3|MetaCyc: PWY-7851, KEGG: 00770+2.7.7.3|MetaCyc: PWY-7851, KEGG: 00770+2.7.7.3|MetaCyc: PWY-7851, KEGG: 00770+2.7.7.3|MetaCyc: PWY-7851, KEGG: 00770+2.7.7.3|MetaCyc: PWY-7851, KEGG: 00770+2.7.7.3|MetaCyc: PWY-7851, KEGG: 00770+2.7.7.3|MetaCyc: PWY-7851, KEGG: 00770+2.7.7.3|MetaCyc: PWY-7851
[truncated: 2,354 more rows]

## Sheet: antibiotic_resistance_genes
NC_008261.1_0_102	195103.CPF_0111	2.4e-146	525	Clostridiaceae			3.5.1.28	ko:K01448	ko01503,map01503	M00727	R04112	RC00064,RC00141	ko00000,ko00001,ko00002,ko01000,ko01011,ko03036				Bacteria	1UY5Q@1239,247Y6@186801,36HS7@31979,COG0860@1,COG0860@2	NA|NA|NA	M	N-acetylmuramoyl-L-alanine amidase	['ProSiteProfiles', 'Gene3D', 'CDD', 'Pfam', 'MobiDBLite', 'MobiDBLite', 'SMART', 'MobiDBLite', 'Coils', 'PANTHER', 'PANTHER', 'SUPERFAMILY']	['PS51257', 'G3DSA:3.40.630.40', 'cd02696', 'PF01520', 'mobidb-lite', 'mobidb-lite', 'SM00646', 'mobidb-lite', 'Coil', 'PTHR30404', 'PTHR30404:SF3', 'SSF53187']	['Prokaryotic membrane lipoprotein lipid attachment site profile.', nan, 'MurNAc-LAA', 'N-acetylmuramoyl-L-alanine amidase', 'consensus disorder prediction', 'consensus disorder prediction', nan, 'consensus disorder prediction', nan, nan, nan, nan]	[nan, nan, 'IPR002508', 'IPR002508', nan, nan, 'IPR002508', nan, nan, nan, nan, nan]	[nan, nan, 'N-acetylmuramoyl-L-alanine amidase, catalytic domain', 'N-acetylmuramoyl-L-alanine amidase, catalytic domain', nan, nan, 'N-acetylmuramoyl-L-alanine amidase, catalytic domain', nan, nan, nan, nan, nan]	[nan, nan, 'GO:0008745|GO:0009253', 'GO:0008745|GO:0009253', nan, nan, 'GO:0008745|GO:0009253', nan, nan, nan, nan, nan]	[nan, nan, nan, nan, nan, nan, nan, nan, nan, nan, nan, nan]
[truncated: 24 more rows]
