# Supplementary material for: First metagenomic analysis of the Andean condor (Vultur gryphus) gut microbiome reveals microbial diversity and wide resistome
Source: PeerJ. 2023 Jul 7;11:e15235. doi: 10.7717/peerj.15235 (PMC10332357; doi:10.7717/peerj.15235)
Supplement: Supplemental Information 6 [file peerj-11-15235-s006.xlsx]

## Sheet: contigs_ps_annotation_final
gene_id	seed_eggNOG_ortholog	seed_ortholog_evalue	seed_ortholog_score	best_tax_level	Preferred_name	GOs	EC	KEGG_ko	KEGG_Pathway	KEGG_Module	KEGG_Reaction	KEGG_rclass	BRITE	KEGG_TC	CAZy	BiGG_Reaction	Tax.scope	eggNOG.Ogs	Best.Ogs	COGs	eggNOG.HMM.Description	Analysis	AnAccess	Description	InterPro_ann	Interpro_description	GO	Pathways
NZ_CP050969.1_1_1	574966.KB898654_gene1207	5.7e-34	149.8	Oceanospirillales	yefM		2.3.1.15	ko:K08591,ko:K19158,ko:K19159	ko00561,ko00564,ko01100,ko01110,map00561,map00564,map01100,map01110	M00089	R00851,R09380	RC00004,RC00039,RC00041	ko00000,ko00001,ko00002,ko01000,ko01004,ko02048				Bacteria	1N6X6@1224,1S9S2@1236,1XK5I@135619,COG2161@1,COG2161@2	NA|NA|NA	D	Antitoxin component of a toxin-antitoxin (TA) module	SUPERFAMILY, Gene3D, TIGRFAM, PANTHER, PANTHER, Pfam, Gene3D	SSF143120, G3DSA:3.40.1620.10, TIGR01552, PTHR33713, PTHR33713:SF6, PF02604, G3DSA:1.10.1220.170	phd_fam: prevent-host-death family protein, Antitoxin Phd_YefM, type II toxin-antitoxin system	IPR036165,IPR006442	YefM-like superfamily,Type II toxin-antitoxin system, antitoxin Phd/YefM
NZ_CP050969.1_100_1	55207.KP22_04115	7e-29	133.3	Gammaproteobacteria													Bacteria	1R85J@1224,1RZ1V@1236,28ICN@1,2Z8EY@2	NA|NA|NA	S	Protein of unknown function (DUF4043)	Pfam	PF13252	Protein of unknown function (DUF4043)	IPR025267	Protein of unknown function DUF4043
NZ_CP050969.1_101_1	667121.ET1_07_00910	4.9e-08	63.5	Gammaproteobacteria													Bacteria	1RIPZ@1224,1S7Y0@1236,2B5CE@1,31Y6M@2	NA|NA|NA			MobiDBLite, MobiDBLite, MobiDBLite	mobidb-lite, mobidb-lite, mobidb-lite	consensus disorder prediction, consensus disorder prediction, consensus disorder prediction
NZ_CP050969.1_104_1	1190606.AJYG01000064_gene1366	3.4e-09	66.6	Vibrionales			2.7.11.1	ko:K12132					ko00000,ko01000,ko01001				Bacteria	1N4R0@1224,1RY0B@1236,1XWKY@135623,COG3170@1,COG3170@2	NA|NA|NA	NU	Tfp pilus assembly protein FimV	MobiDBLite	mobidb-lite	consensus disorder prediction
NZ_CP050969.1_106_1	55207.KP22_04100	2.3e-14	84.7	Gammaproteobacteria			2.7.11.1	ko:K12132					ko00000,ko01000,ko01001				Bacteria	1N4R0@1224,1RY0B@1236,COG3170@1,COG3170@2	NA|NA|NA	NU	Tfp pilus assembly protein FimV	NA	NA	NA	NA	NA	NA	NA
NZ_CP050969.1_111_1	1190606.AJYG01000064_gene1365	3.1e-13	80.5	Vibrionales													Bacteria	1R2FH@1224,1RN1F@1236,1XV21@135623,COG4626@1,COG4626@2	NA|NA|NA	S	Terminase	NA	NA	NA	NA	NA	NA	NA
NZ_CP050969.1_113_1	1441930.Z042_23155	5.2e-21	106.3	Gammaproteobacteria													Bacteria	1R2FH@1224,1RN1F@1236,COG4626@1,COG4626@2	NA|NA|NA	F	Terminase	Gene3D	G3DSA:3.40.50.300
NZ_CP050969.1_114_1	380703.AHA_2055	3.3e-08	62.8	Gammaproteobacteria	apt		2.4.2.7	ko:K00759	ko00230,ko01100,map00230,map01100		R00190,R01229,R04378	RC00063	ko00000,ko00001,ko01000,ko04147				Bacteria	1R2FH@1224,1RN1F@1236,COG0503@1,COG0503@2,COG4626@1,COG4626@2	NA|NA|NA	F	Terminase	NA	NA	NA	NA	NA	NA	NA
NZ_CP050969.1_115_1	NA	NA	NA	NA	NA	NA	NA	NA	NA	NA	NA	NA	NA	NA	NA	NA	NA	NA	NA	NA	NA	Coils	Coil
NZ_CP050969.1_116_1	1441930.Z042_23150	9.8e-10	70.1	Gammaproteobacteria				ko:K07474					ko00000				Bacteria	1N9GQ@1224,1SEU3@1236,COG3728@1,COG3728@2	NA|NA|NA	L	DNA packaging	MobiDBLite, MobiDBLite, MobiDBLite	mobidb-lite, mobidb-lite, mobidb-lite	consensus disorder prediction, consensus disorder prediction, consensus disorder prediction
NZ_CP050969.1_119_1	NA	NA	NA	NA	NA	NA	NA	NA	NA	NA	NA	NA	NA	NA	NA	NA	NA	NA	NA	NA	NA	Coils	Coil
NZ_CP050969.1_120_1	1357272.AVEO02000199_gene173	2.4e-28	131.7	Pseudomonas syringae group			3.2.1.17	ko:K01185,ko:K21471					ko00000,ko01000,ko01002,ko01011				Bacteria	1R92U@1224,1S23X@1236,1ZAAD@136849,COG4678@1,COG4678@2	NA|NA|NA	G	Phage lysozyme	Gene3D, SUPERFAMILY	G3DSA:1.10.530.10, SSF53955		IPR023346	Lysozyme-like domain superfamily
NZ_CP050969.1_120_2	NA	NA	NA	NA	NA	NA	NA	NA	NA	NA	NA	NA	NA	NA	NA	NA	NA	NA	NA	NA	NA	Pfam	PF05106	Phage holin family (Lysis protein S)	IPR006481	Bacteriophage lambda, GpS, holin
NZ_CP050969.1_120_3	55207.KP22_04050	4.9e-28	131.7	Pectobacterium													Bacteria	1MT9Y@122277,1MYM0@1224,1S7JY@1236,2AEEQ@1,3149K@2	NA|NA|NA			TIGRFAM	TIGR02642	phage_xxxx: uncharacterized phage protein	IPR013464	Conserved hypothetical protein CHP02642
NZ_CP050969.1_120_4	380703.AHA_2041	2.7e-29	134.4	Gammaproteobacteria			2.1.1.72	ko:K07316					ko00000,ko01000,ko02048				Bacteria	1N7EJ@1224,1SF5D@1236,COG2852@1,COG2852@2	NA|NA|NA	S	Protein conserved in bacteria	Gene3D, SUPERFAMILY	G3DSA:3.40.960.10, SSF52980		IPR011335	Restriction endonuclease type II-like		Reactome: R-HSA-6783310
NZ_CP050969.1_121_1	1122139.KB907863_gene1767	5e-19	99.8	Gammaproteobacteria													Bacteria	1N2H1@1224,1S9D0@1236,2E7QF@1,32TYS@2	NA|NA|NA			Gene3D	G3DSA:3.30.50.20
NZ_CP050969.1_122_1	675817.VDA_000930	2.3e-10	71.2	Vibrionales													Bacteria	1R6SC@1224,1RR2K@1236,1XX09@135623,28KZZ@1,2ZAF4@2	NA|NA|NA	S	Protein of unknown function (DUF1367)	Pfam	PF07105	Protein of unknown function (DUF1367)	IPR009797	Protein of unknown function DUF1367
NZ_CP050969.1_125_1	1316936.K678_08164	2.4e-11	74.3	Rhodospirillales													Bacteria	1MZY9@1224,2JTAV@204441,2UC68@28211,COG4675@1,COG4675@2	NA|NA|NA	S	Phage Tail Collar Domain	Pfam, SUPERFAMILY	PF07484, SSF88874	Phage Tail Collar Domain	IPR011083	Phage tail collar domain
NZ_CP050969.1_130_1	NA	NA	NA	NA	NA	NA	NA	NA	NA	NA	NA	NA	NA	NA	NA	NA	NA	NA	NA	NA	NA	MobiDBLite	mobidb-lite	consensus disorder prediction
NZ_CP050969.1_131_1	NA	NA	NA	NA	NA	NA	NA	NA	NA	NA	NA	NA	NA	NA	NA	NA	NA	NA	NA	NA	NA	Gene3D, SUPERFAMILY, Pfam, MobiDBLite	G3DSA:2.60.40.10, SSF49313, PF05345, mobidb-lite	Putative Ig domain, consensus disorder prediction	IPR013783, IPR015919, IPR008009	Immunoglobulin-like fold, Cadherin-like superfamily, Putative Ig	GO:0005509, GO:0016020
NZ_CP050969.1_132_1	1124983.PFLCHA0_c35610	1.7e-32	146.4	Bacteria			3.4.21.50	ko:K01337,ko:K20276,ko:K21449	ko02024,map02024				ko00000,ko00001,ko01000,ko01002,ko02000	1.B.40.2			Bacteria	COG4625@1,COG4625@2	NA|NA|NA	T	pathogenesis	Gene3D, Pfam, SUPERFAMILY	G3DSA:2.60.40.10, PF05345, SSF49313	Putative Ig domain	IPR013783, IPR008009, IPR015919	Immunoglobulin-like fold, Putative Ig, Cadherin-like superfamily	GO:0005509, GO:0016020
NZ_CP050969.1_135_1	1124983.PFLCHA0_c35610	8.3e-10	68.9	Bacteria			3.4.21.50	ko:K01337,ko:K20276,ko:K21449	ko02024,map02024				ko00000,ko00001,ko01000,ko01002,ko02000	1.B.40.2			Bacteria	COG4625@1,COG4625@2	NA|NA|NA	T	pathogenesis	SUPERFAMILY, Gene3D, Pfam	SSF103515, G3DSA:2.40.128.130, PF03797	Autotransporter beta-domain	IPR036709, IPR036709, IPR005546	Autotransporter beta-domain superfamily, Autotransporter beta-domain superfamily, Autotransporter beta-domain
NZ_CP050969.1_136_1	1124983.PFLCHA0_c35610	2.9e-15	88.2	Bacteria			3.4.21.50	ko:K01337,ko:K20276,ko:K21449	ko02024,map02024				ko00000,ko00001,ko01000,ko01002,ko02000	1.B.40.2			Bacteria	COG4625@1,COG4625@2	NA|NA|NA	T	pathogenesis	SUPERFAMILY, Gene3D, Pfam, ProSiteProfiles	SSF103515, G3DSA:2.40.128.130, PF03797, PS51208	Autotransporter beta-domain, Autotransporter beta-domain profile.	IPR036709, IPR036709, IPR005546, IPR005546	Autotransporter beta-domain superfamily, Autotransporter beta-domain superfamily, Autotransporter beta-domain, Autotransporter beta-domain
NZ_CP050969.1_138_1	316275.VSAL_I1517	1e-39	169.5	Gammaproteobacteria													Bacteria	1RCP3@1224,1S3DJ@1236,COG0500@1,COG0500@2	NA|NA|NA	Q	Methyltransferase domain	SUPERFAMILY, Pfam, Gene3D, CDD	SSF53335, PF08241, G3DSA:3.40.50.150, cd02440	Methyltransferase domain, AdoMet_MTases	IPR029063, IPR013216	S-adenosyl-L-methionine-dependent methyltransferase, Methyltransferase type 11	GO:0008168
NZ_CP050969.1_142_1	529507.PMI0909	1.7e-23	115.9	Proteus	ybl78												Bacteria	1PR7I@1224,1TGCT@1236,3Z378@583,COG3935@1,COG3935@2	NA|NA|NA	L	DnaD domain protein	MobiDBLite, MobiDBLite	mobidb-lite, mobidb-lite	consensus disorder prediction, consensus disorder prediction
NZ_CP050969.1_148_1	NA	NA	NA	NA	NA	NA	NA	NA	NA	NA	NA	NA	NA	NA	NA	NA	NA	NA	NA	NA	NA	Coils	Coil
NZ_CP050969.1_149_1	380703.AHA_2020	1.4e-49	202.2	Gammaproteobacteria				ko:K10906					ko00000,ko01000,ko03400				Bacteria	1QUEK@1224,1T1W3@1236,2DBBN@1,2Z88V@2	NA|NA|NA	S	PDDEXK-like domain of unknown function (DUF3799)	Gene3D	G3DSA:3.90.320.10		IPR011604	Exonuclease, phage-type/RecB, C-terminal
NZ_CP050969.1_15_2	1190603.AJYD01000023_gene642	1.4e-87	329.3	Vibrionales													Bacteria	1MUWA@1224,1RRAF@1236,1XWRT@135623,COG3897@1,COG3897@2	NA|NA|NA	S	Lysine methyltransferase	CDD, PANTHER, SUPERFAMILY, Gene3D, Pfam	cd02440, PTHR14614, SSF53335, G3DSA:3.40.50.150, PF10294	AdoMet_MTases, Lysine methyltransferase	IPR029063, IPR019410	S-adenosyl-L-methionine-dependent methyltransferase, Lysine methyltransferase
NZ_CP050969.1_150_1	380703.AHA_2020	2.6e-21	107.5	Gammaproteobacteria				ko:K10906					ko00000,ko01000,ko03400				Bacteria	1QUEK@1224,1T1W3@1236,2DBBN@1,2Z88V@2	NA|NA|NA	S	PDDEXK-like domain of unknown function (DUF3799)	NA	NA	NA	NA	NA	NA	NA
NZ_CP050969.1_151_1	380703.AHA_2020	6.2e-77	293.9	Gammaproteobacteria				ko:K10906					ko00000,ko01000,ko03400				Bacteria	1QUEK@1224,1T1W3@1236,2DBBN@1,2Z88V@2	NA|NA|NA	S	PDDEXK-like domain of unknown function (DUF3799)	Pfam, Gene3D	PF12684, G3DSA:3.90.320.10	PDDEXK-like domain of unknown function (DUF3799)	IPR024432, IPR011604	Putative exodeoxyribonuclease 8, PDDEXK-like domain, Exonuclease, phage-type/RecB, C-terminal
NZ_CP050969.1_152_1	399795.CtesDRAFT_PD3322	5.6e-72	277.7	Proteobacteria	STY2074												Bacteria	1MXNC@1224,28JXH@1,2Z9MZ@2	NA|NA|NA	S	RecT family	Pfam, MobiDBLite	PF03837, mobidb-lite	RecT family, consensus disorder prediction	IPR018330	RecT family	GO:0003677, GO:0006259
NZ_CP050969.1_153_1	NA	NA	NA	NA	NA	NA	NA	NA	NA	NA	NA	NA	NA	NA	NA	NA	NA	NA	NA	NA	NA	MobiDBLite, MobiDBLite	mobidb-lite, mobidb-lite	consensus disorder prediction, consensus disorder prediction
NZ_CP050969.1_155_1	NA	NA	NA	NA	NA	NA	NA	NA	NA	NA	NA	NA	NA	NA	NA	NA	NA	NA	NA	NA	NA	Coils	Coil
NZ_CP050969.1_157_1	NA	NA	NA	NA	NA	NA	NA	NA	NA	NA	NA	NA	NA	NA	NA	NA	NA	NA	NA	NA	NA	Coils	Coil
NZ_CP050969.1_158_1	55207.KP22_03910	2.6e-32	145.2	Gammaproteobacteria													Bacteria	1NRPC@1224,1SMZD@1236,2F012@1,33T4X@2	NA|NA|NA			Gene3D, Pfam, SUPERFAMILY	G3DSA:1.10.150.20, PF03118, SSF47789	Bacterial RNA polymerase, alpha chain C terminal domain	IPR011260	RNA polymerase, alpha subunit, C-terminal	GO:0003677, GO:0003899, GO:0006351	KEGG: 00230+2.7.7.6|KEGG: 00240+2.7.7.6
NZ_CP050969.1_162_10	1332071.L581_0285	7.8e-83	313.5	Serratia													Bacteria	1N0YI@1224,1RMWT@1236,401IG@613,COG0745@1,COG0745@2	NA|NA|NA	K	response regulator	PANTHER, SMART, Pfam, Pfam, SUPERFAMILY, SMART, CDD, ProSiteProfiles, CDD, Gene3D, Gene3D, ProSiteProfiles, PANTHER	PTHR26402:SF716, SM00448, PF00072, PF00486, SSF52172, SM00862, cd00383, PS51755, cd00156, G3DSA:1.10.10.10, G3DSA:3.40.50.2300, PS50110, PTHR26402	Response regulator receiver domain, Transcriptional regulatory protein, C terminal, trans_reg_C, OmpR/PhoB-type DNA-binding domain profile., REC, Response regulatory domain profile.	IPR001789, IPR001789, IPR001867, IPR011006, IPR001867, IPR001867, IPR001867, IPR001789, IPR036388, IPR001789, IPR039420	Signal transduction response regulator, receiver domain, Signal transduction response regulator, receiver domain, OmpR/PhoB-type DNA-binding domain, CheY-like superfamily, OmpR/PhoB-type DNA-binding domain, OmpR/PhoB-type DNA-binding domain, OmpR/PhoB-type DNA-binding domain, Signal transduction response regulator, receiver domain, Winged helix-like DNA-binding domain superfamily, Signal transduc…	GO:0000160, GO:0000160, GO:0000160, GO:0003677, GO:0006355, GO:0000160, GO:0003677, GO:0006355, GO:0000160, GO:0003677, GO:0006355, GO:0000160, GO:0003677, GO:0006355, GO:0000160, GO:0000160
NZ_CP050969.1_162_11	1267600.JFGT01000006_gene1228	4.9e-146	524.6	Pantoea													Bacteria	1QTVU@1224,1RPFY@1236,3VYCD@53335,COG0642@1,COG2205@2	NA|NA|NA	T	PhoQ Sensor	PANTHER, SMART, SUPERFAMILY, Gene3D, CDD, Pfam, ProSiteProfiles, Gene3D, Pfam, ProSiteProfiles, PRINTS, PRINTS, CDD, Gene3D, SUPERFAMILY	PTHR45436, SM00387, SSF55874, G3DSA:3.30.565.10, cd00075, PF02518, PS50885, G3DSA:1.10.287.130, PF08918, PS50109, PR00344, PR00344, cd00082, G3DSA:3.30.450.140, SSF47384	HATPase_c, Histidine kinase-, DNA gyrase B-, and HSP90-like ATPase, HAMP domain profile., PhoQ Sensor, Histidine kinase domain profile., Bacterial sensor protein C-terminal signature, Bacterial sensor protein C-terminal signature, HisKA	IPR003594, IPR036890, IPR036890, IPR003594, IPR003594, IPR003660, IPR015014, IPR005467, IPR004358, IPR004358, IPR003661, IPR038429, IPR036097	Histidine kinase/HSP90-like ATPase, Histidine kinase/HSP90-like ATPase superfamily, Histidine kinase/HSP90-like ATPase superfamily, Histidine kinase/HSP90-like ATPase, Histidine kinase/HSP90-like ATPase, HAMP domain, PhoQ Sensor, Histidine kinase domain, Signal transduction histidine kinase-related protein, C-terminal, Signal transduction histidine kinase-related protein, C-terminal, Signal trans…	GO:0007165, GO:0016021, GO:0000160, GO:0004673, GO:0005524, GO:0016020, GO:0018106, GO:0046872, GO:0016310, GO:0016772, GO:0016310, GO:0016772, GO:0000155, GO:0007165, GO:0000155, GO:0007165	Reactome: R-HSA-204174|Reactome: R-HSA-5362517, Reactome: R-HSA-70895, Reactome: R-HSA-70895
NZ_CP050969.1_162_12	1344012.ATMI01000031_gene2831	4.2e-137	494.6	Tatumella	ycfD	GO:0003674,GO:0003824,GO:0005488,GO:0005506,GO:0006464,GO:0006807,GO:0008150,GO:0008152,GO:0008198,GO:0009987,GO:0016491,GO:0016705,GO:0016706,GO:0018193,GO:0018195,GO:0019538,GO:0030961,GO:0036211,GO:0043167,GO:0043169,GO:0043170,GO:0043412,GO:0043687,GO:0044237,GO:0044238,GO:0044260,GO:0044267,GO:0046872,GO:0046914,GO:0051213,GO:0055114,GO:0071704,GO:1901564	1.14.11.47	ko:K18850					ko00000,ko01000,ko03009				Bacteria	1MW30@1224,1RN2Q@1236,4BUKU@82986,COG2850@1,COG2850@2	NA|NA|NA	S	A domain family that is part of the cupin metalloenzyme superfamily.	ProSiteProfiles, Pfam, SMART, Gene3D, SUPERFAMILY, Gene3D, PANTHER, PANTHER	PS51184, PF08007, SM00558, G3DSA:2.60.120.650, SSF51197, G3DSA:1.10.10.2510, PTHR13096:SF8, PTHR13096	JmjC domain profile., Cupin superfamily protein	IPR003347, IPR003347, IPR003347,IPR039994	JmjC domain, JmjC domain, JmjC domain,JmjC domain-containing
NZ_CP050969.1_162_13	1005048.CFU_1195	1.9e-29	136	Oxalobacteraceae	pgpB		3.6.1.27	ko:K19302	ko00550,map00550		R05627	RC00002	ko00000,ko00001,ko01000,ko01011				Bacteria	1R56P@1224,2VQMD@28216,4751B@75682,COG0671@1,COG0671@2	NA|NA|NA	I	Acid phosphatase homologues	CDD, PANTHER, SUPERFAMILY, PANTHER, SMART, Pfam, Gene3D	cd03385, PTHR14969, SSF48317, PTHR14969:SF13, SM00014, PF01569, G3DSA:1.20.144.10	PAP2_BcrC_like,PAP2 superfamily	IPR033879, IPR036938, IPR000326, IPR000326	Undecaprenyl-diphosphatase, Phosphatidic acid phosphatase type 2/haloperoxidase superfamily, Phosphatidic acid phosphatase type 2/haloperoxidase, Phosphatidic acid phosphatase type 2/haloperoxidase	GO:0005886, GO:0050380
NZ_CP050969.1_162_14	592316.Pat9b_2660	6.2e-88	331.6	Pantoea	rtn	GO:0003674,GO:0003824,GO:0005575,GO:0005623,GO:0005886,GO:0008081,GO:0016020,GO:0016787,GO:0016788,GO:0042578,GO:0044464,GO:0071111,GO:0071944											Bacteria	1NJQD@1224,1RNEP@1236,3VZ0A@53335,COG2200@1,COG2200@2	NA|NA|NA	T	Involved in resistance to the phages N4 and lambda	Gene3D, SMART, Pfam, PANTHER, PANTHER, CDD, ProSiteProfiles, Pfam, SUPERFAMILY	G3DSA:3.20.20.450, SM00052, PF12792, PTHR33121:SF1, PTHR33121, cd01948, PS50883, PF00563, SSF141868	CSS motif domain associated with EAL, EAL, EAL domain profile., EAL domain	IPR035919, IPR001633, IPR024744, IPR001633, IPR001633, IPR001633, IPR035919	EAL domain superfamily, EAL domain, Putative cyclic diguanylate phosphodiesterase, CSS motif-containing domain, EAL domain, EAL domain, EAL domain, EAL domain superfamily
NZ_CP050969.1_162_15	NA	NA	NA	NA	NA	NA	NA	NA	NA	NA	NA	NA	NA	NA	NA	NA	NA	NA	NA	NA	NA	Pfam	PF05666	Fels-1 Prophage Protein-like	IPR008617	Uncharacterised protein family, YcgJ
NZ_CP050969.1_162_17	529507.PMI1392	2e-62	245	Proteus	gloA	GO:0003674,GO:0003824,GO:0004462,GO:0005488,GO:0005575,GO:0005622,GO:0005623,GO:0005737,GO:0005829,GO:0006081,GO:0006082,GO:0006089,GO:0006518,GO:0006575,GO:0006749,GO:0006790,GO:0006807,GO:0008150,GO:0008152,GO:0009056,GO:0009438,GO:0009987,GO:0016151,GO:0016829,GO:0016846,GO:0019243,GO:0019752,GO:0032787,GO:0034641,GO:0042180,GO:0042182,GO:0043167,GO:0043169,GO:0043436,GO:0043603,GO:0044237,GO:…	4.4.1.5	ko:K01759	ko00620,map00620		R02530	RC00004,RC00740	ko00000,ko00001,ko01000			iAPECO1_1312.APECO1_733,iECABU_c1320.ECABU_c19040,iECED1_1282.ECED1_1851,iECNA114_1301.ECNA114_1699,iECOK1_1307.ECOK1_1770,iECP_1309.ECP_1597,iECS88_1305.ECS88_1700,iECSF_1327.ECSF_1514,iLF82_1304.LF82_0861,iNRG857_1313.NRG857_08275,iUMN146_1321.UM146_08895,iUTI89_1310.UTI89_C1842,ic_1306.c2044	Bacteria	1RCYX@1224,1S1Z9@1236,3Z2K7@583,COG0346@1,COG0346@2	NA|NA|NA	H	Catalyzes the conversion of hemimercaptal, formed from methylglyoxal and glutathione, to S-lactoylglutathione	PANTHER, ProSiteProfiles, ProSitePatterns, TIGRFAM, Pfam, CDD, ProSitePatterns, PANTHER, SUPERFAMILY, Gene3D	PTHR10374:SF25, PS51819, PS00934, TIGR00068, PF00903, cd16358, PS00935, PTHR10374, SSF54593, G3DSA:3.10.180.10	Vicinal oxygen chelate (VOC) domain profile., Glyoxalase I signature 1., glyox_I: lactoylglutathione lyase, Glyoxalase/Bleomycin resistance protein/Dioxygenase superfamily, GlxI_Ni, Glyoxalase I signature 2.	IPR037523, IPR018146, IPR004361, IPR004360, IPR018146, IPR029068, IPR029068	Vicinal oxygen chelate (VOC) domain, Glyoxalase I, conserved site, Glyoxalase I, Glyoxalase/fosfomycin resistance/dioxygenase domain, Glyoxalase I, conserved site, Glyoxalase/Bleomycin resistance protein/Dihydroxybiphenyl dioxygenase, Glyoxalase/Bleomycin resistance protein/Dihydroxybiphenyl dioxygenase	GO:0004462, GO:0046872, GO:0004462, GO:0046872, GO:0004462, GO:0046872	KEGG: 00620+4.4.1.5|MetaCyc: PWY-5386|Reactome: R-HSA-70268, KEGG: 00620+4.4.1.5|MetaCyc: PWY-5386|Reactome: R-HSA-70268, KEGG: 00620+4.4.1.5|MetaCyc: PWY-5386|Reactome: R-HSA-70268
NZ_CP050969.1_162_18	675813.VIB_001691	2.8e-77	295.4	Vibrionales	motY			ko:K21218	ko02040,map02040				ko00000,ko00001,ko02000,ko02035	1.A.30.1			Bacteria	1PGGZ@1224,1RNFU@1236,1XUNB@135623,COG2885@1,COG2885@2	NA|NA|NA	N	flagellar protein MotY	SUPERFAMILY, CDD, PANTHER, Gene3D, PANTHER, Gene3D, ProSiteProfiles, PRINTS, PRINTS, PRINTS, PRINTS, PRINTS, PRINTS, PRINTS, PRINTS, PRINTS, PRINTS, PRINTS, PRINTS, Pfam	SSF103088, cd07185, PTHR30128:SF22, G3DSA:2.60.40.2540, PTHR30128, G3DSA:3.30.1330.60, PS51123, PR01023, PR01023, PR01023, PR01023, PR01023, PR01023, PR01023, PR01023, PR01023, PR01023, PR01023, PR01023, PF00691	OmpA_C-like,OmpA-like domain profile., Sodium-type flagellar protein MotY precursor signature, Sodium-type flagellar protein MotY precursor signature, Sodium-type flagellar protein MotY precursor signature, Sodium-type flagellar protein MotY precursor signature, Sodium-type flagellar protein MotY precursor signature, Sodium-type flagellar protein MotY precursor signature, Sodium-type flagellar pr…	IPR036737, IPR006665, IPR036737, IPR006665, IPR006665	OmpA-like domain superfamily, OmpA-like domain, OmpA-like domain superfamily, OmpA-like domain, OmpA-like domain
NZ_CP050969.1_162_19	1082705.JIBP01000010_gene215	8e-96	356.7	Gammaproteobacteria	rnt	GO:0000287,GO:0003674,GO:0003824,GO:0004518,GO:0004527,GO:0004540,GO:0005488,GO:0005515,GO:0005575,GO:0005622,GO:0005623,GO:0005737,GO:0005829,GO:0006139,GO:0006396,GO:0006399,GO:0006725,GO:0006807,GO:0008033,GO:0008150,GO:0008152,GO:0008408,GO:0009987,GO:0010467,GO:0016070,GO:0016787,GO:0016788,GO:0031123,GO:0034470,GO:0034641,GO:0034660,GO:0042780,GO:0042802,GO:0043167,GO:0043169,GO:0043170,GO:…		ko:K03683					ko00000,ko01000,ko03016				Bacteria	1MUPK@1224,1RMMH@1236,COG0847@1,COG0847@2	NA|NA|NA	L	Trims short 3 overhangs of a variety of RNA species, leaving a one or two nucleotide 3 overhang. Responsible for the end-turnover of tRNA specifically removes the terminal AMP residue from uncharged tRNA (tRNA-C-C-A). Also appears to be involved in tRNA biosynthesis	Hamap, CDD, SMART, SUPERFAMILY, Pfam, PANTHER, TIGRFAM, Gene3D, PANTHER	MF_00157, cd06134, SM00479, SSF53098, PF00929, PTHR30231:SF2, TIGR01298, G3DSA:3.30.420.10, PTHR30231	Ribonuclease T [rnt]., RNaseT, Exonuclease, RNaseT: ribonuclease T	IPR005987, IPR005987, IPR013520, IPR012337, IPR013520, IPR005987, IPR005987, IPR036397	Ribonuclease T, Ribonuclease T, Exonuclease, RNase T/DNA polymerase III, Ribonuclease H-like superfamily, Exonuclease, RNase T/DNA polymerase III, Ribonuclease T, Ribonuclease T, Ribonuclease H superfamily	GO:0004540, GO:0006396, GO:0004540, GO:0006396, GO:0004540, GO:0006396, GO:0004540, GO:0006396, GO:0003676
NZ_CP050969.1_162_2	NA	NA	NA	NA	NA	NA	NA	NA	NA	NA	NA	NA	NA	NA	NA	NA	NA	NA	NA	NA	NA	SUPERFAMILY	SSF46955		IPR009061	Putative DNA-binding domain superfamily
NZ_CP050969.1_162_20	558884.JRGM01000008_gene3417	2.6e-71	275	Aeromonadales	phnA	GO:0005575,GO:0005622,GO:0005623,GO:0005737,GO:0005829,GO:0044424,GO:0044444,GO:0044464		ko:K06193	ko01120,map01120				ko00000				Bacteria	1RGUU@1224,1S60W@1236,1Y4W8@135624,COG2824@1,COG2824@2	NA|NA|NA	P	PhnA domain	PANTHER, PANTHER, SMART, SUPERFAMILY, Gene3D, Pfam, Pfam	PTHR30305, PTHR30305:SF3, SM00782, SSF82057, G3DSA:2.30.30.40, PF08274, PF03831	PhnA Zinc-Ribbon, PhnA domain	IPR004624, IPR013991, IPR013987, IPR013988	PhnA protein, PhnA protein N-terminal, proteobacterial, PhnA protein, N-terminal, PhnA protein, C-terminal
NZ_CP050969.1_162_21	590409.Dd586_1734	7.2e-109	400.6	Dickeya	zntB	GO:0000041,GO:0003674,GO:0005215,GO:0005385,GO:0005575,GO:0005623,GO:0005886,GO:0005887,GO:0006810,GO:0006811,GO:0006812,GO:0006829,GO:0008150,GO:0008324,GO:0015075,GO:0015318,GO:0015562,GO:0016020,GO:0016021,GO:0022857,GO:0022883,GO:0022890,GO:0030001,GO:0031224,GO:0031226,GO:0034220,GO:0044425,GO:0044459,GO:0044464,GO:0046583,GO:0046873,GO:0046915,GO:0051179,GO:0051234,GO:0055085,GO:0070838,GO:…		ko:K03284,ko:K16074					ko00000,ko02000	1.A.35.1,1.A.35.3,1.A.35.4			Bacteria	1MW8W@1224,1RRTZ@1236,2JCIR@204037,COG0598@1,COG0598@2	NA|NA|NA	P	PFAM Mg2 transporter protein CorA family protein	Gene3D, Pfam, Gene3D, CDD, SUPERFAMILY, PANTHER, SUPERFAMILY, Gene3D, PANTHER	G3DSA:1.20.58.340, PF01544, G3DSA:3.30.460.20, cd12833, SSF144083, PTHR21535:SF60, SSF143865, G3DSA:1.20.58.340, PTHR21535	CorA-like Mg2+ transporter protein, ZntB-like_1,nan]	IPR002523	Mg2+ transporter protein, CorA-like/Zinc transport protein ZntB	GO:0016020, GO:0030001, GO:0046873, GO:0055085
NZ_CP050969.1_162_23	1524467.IV04_08790	1.2e-55	222.6	Serratia	menI	GO:0003674,GO:0003824,GO:0006732,GO:0008150,GO:0008152,GO:0009058,GO:0009108,GO:0009233,GO:0009234,GO:0009987,GO:0016289,GO:0016787,GO:0016788,GO:0016790,GO:0042180,GO:0042181,GO:0044237,GO:0044249,GO:0044281,GO:0044283,GO:0051186,GO:0051188,GO:0061522,GO:0071704,GO:1901576,GO:1901661,GO:1901663	3.1.2.28	ko:K19222	ko00130,ko01100,ko01110,map00130,map01100,map01110	M00116	R07262	RC00004,RC00174	ko00000,ko00001,ko00002,ko01000				Bacteria	1RGVP@1224,1S5WY@1236,4037D@613,COG2050@1,COG2050@2	NA|NA|NA	Q	Catalyzes the hydrolysis of 1,4-dihydroxy-2-naphthoyl- CoA (DHNA-CoA) to 1,4-dihydroxy-2-naphthoate (DHNA)	TIGRFAM, PANTHER, SUPERFAMILY, CDD, Gene3D, PANTHER, Pfam	TIGR00369, PTHR43240, SSF54637, cd03443, G3DSA:3.10.129.10, PTHR43240:SF2, PF03061	unchar_dom_1: uncharacterized domain 1, PaaI_thioesterase, Thioesterase superfamily	IPR003736, IPR029069, IPR006683	Phenylacetic acid degradation-related domain, HotDog domain superfamily, Thioesterase domain		Reactome: R-HSA-77289, Reactome: R-HSA-77289
NZ_CP050969.1_162_24	590409.Dd586_1652	0	1497.6	Dickeya	ydiJ	GO:0000166,GO:0003674,GO:0005488,GO:0036094,GO:0043167,GO:0043168,GO:0048037,GO:0050660,GO:0050662,GO:0051536,GO:0051539,GO:0051540,GO:0097159,GO:1901265,GO:1901363											Bacteria	1MU6Y@1224,1RQX2@1236,2JC15@204037,COG0247@1,COG0247@2,COG0277@1,COG0277@2	NA|NA|NA	C	PFAM FAD linked oxidase domain protein	SUPERFAMILY, ProSiteProfiles, SUPERFAMILY, ProSitePatterns, PANTHER, Pfam, Pfam, Pfam, PANTHER, SUPERFAMILY, Gene3D	SSF56176, PS51387, SSF46548, PS00198, PTHR11748:SF35, PF02913, PF13183, PF01565, PTHR11748, SSF55103, G3DSA:3.30.465.40	PCMH-type FAD-binding domain profile., 4Fe-4S ferredoxin-type iron-sulfur binding region signature., FAD linked oxidases, C-terminal domain, 4Fe-4S dicluster domain, FAD binding domain	IPR036318, IPR016166, IPR009051, IPR017900, IPR004113, IPR017896, IPR006094, IPR016164	FAD-binding, type PCMH-like superfamily, FAD-binding domain, PCMH-type, Alpha-helical ferredoxin, 4Fe-4S ferredoxin, iron-sulphur binding, conserved site, FAD-linked oxidase, C-terminal, 4Fe-4S ferredoxin-type, iron-sulphur binding domain, FAD linked oxidase, N-terminal, FAD-linked oxidase-like, C-terminal	GO:0050660, GO:0071949, GO:0051536, GO:0003824, GO:0050660, GO:0016491, GO:0050660, GO:0055114, GO:0003824, GO:0050660
NZ_CP050969.1_162_25	380703.AHA_1626	8.6e-190	669.8	Aeromonadales	gdhA	GO:0003674,GO:0003824,GO:0004353,GO:0004354,GO:0005488,GO:0005515,GO:0005575,GO:0005622,GO:0005623,GO:0005737,GO:0005829,GO:0006082,GO:0006520,GO:0006536,GO:0006537,GO:0006807,GO:0008150,GO:0008152,GO:0008652,GO:0009058,GO:0009064,GO:0009084,GO:0009987,GO:0016053,GO:0016491,GO:0016638,GO:0016639,GO:0019752,GO:0042802,GO:0043436,GO:0043648,GO:0043650,GO:0044237,GO:0044238,GO:0044249,GO:0044281,GO:…	1.4.1.4	ko:K00262	ko00220,ko00250,ko00910,ko01100,map00220,map00250,map00910,map01100		R00248	RC00006,RC02799	ko00000,ko00001,ko01000			iECH74115_1262.ECH74115_2481,iECSP_1301.ECSP_2329,iECs_1301.ECs2467,iG2583_1286.G2583_2207,iPC815.YPO3971,iSDY_1059.SDY_1514,iYL1228.KPN_01210,iZ_1308.Z2793	Bacteria	1MUMF@1224,1RPUZ@1236,1Y53H@135624,COG0334@1,COG0334@2	NA|NA|NA	E	Belongs to the Glu Leu Phe Val dehydrogenases family	Pfam, Pfam, Gene3D, PIRSF, ProSitePatterns, Gene3D, Gene3D, PANTHER, SUPERFAMILY, Gene3D, SUPERFAMILY, CDD, SMART, PRINTS, PRINTS, PRINTS, PRINTS	PF00208, PF02812, G3DSA:3.40.50.10860, PIRSF000185, PS00074, G3DSA:3.40.50.720, G3DSA:1.10.285.10, PTHR43571, SSF53223, G3DSA:1.10.285.10, SSF51735, cd05313, SM00839, PR00082, PR00082, PR00082, PR00082	Glutamate/Leucine/Phenylalanine/Valine dehydrogenase, Glu/Leu/Phe/Val dehydrogenase, dimerisation domain, Glu / Leu / Phe / Val dehydrogenases active site., NAD_bind_2_Glu_DH, Glutamate/leucine/phenylalanine/valine dehydrogenase signature, Glutamate/leucine/phenylalanine/valine dehydrogenase signature, Glutamate/leucine/phenylalanine/valine dehydrogenase signature, Glutamate/leucine/phenylalanine…	IPR006096, IPR006097, IPR014362, IPR033524, IPR036291, IPR033922, IPR006096, IPR006095, IPR006095, IPR006095, IPR006095	Glutamate/phenylalanine/leucine/valine dehydrogenase, C-terminal, Glutamate/phenylalanine/leucine/valine dehydrogenase, dimerisation domain, Glutamate dehydrogenase, Leu/Phe/Val dehydrogenases active site, NAD(P)-binding domain superfamily, NAD(P) binding domain of glutamate dehydrogenase, Glutamate/phenylalanine/leucine/valine dehydrogenase, C-terminal, Glutamate/phenylalanine/leucine/valine deh…	GO:0006520, GO:0016491, GO:0055114, GO:0006520, GO:0016491, GO:0055114, GO:0016639, GO:0055114, GO:0016639, GO:0006520, GO:0016491, GO:0055114, GO:0006520, GO:0016491, GO:0055114, GO:0006520, GO:0016491, GO:0055114, GO:0006520, GO:0016491, GO:0055114, GO:0006520, GO:0016491, GO:0055114	Reactome: R-HSA-2151201|Reactome: R-HSA-70614, Reactome: R-HSA-2151201|Reactome: R-HSA-70614, Reactome: R-HSA-2151201|Reactome: R-HSA-70614, Reactome: R-HSA-2151201|Reactome: R-HSA-70614, Reactome: R-HSA-2151201|Reactome: R-HSA-70614, Reactome: R-HSA-2151201|Reactome: R-HSA-70614, Reactome: R-HSA-2151201|Reactome: R-HSA-70614, Reactome: R-HSA-2151201|Reactome: R-HSA-70614, Reactome: R-HSA-2151201…
NZ_CP050969.1_162_26	1216966.BAUC01000017_gene684	0	1253.8	Gammaproteobacteria	ppsA	GO:0000287,GO:0003674,GO:0003824,GO:0005488,GO:0005575,GO:0005622,GO:0005623,GO:0005737,GO:0005829,GO:0005975,GO:0005996,GO:0006006,GO:0006094,GO:0006793,GO:0006796,GO:0008150,GO:0008152,GO:0008986,GO:0009058,GO:0009987,GO:0016051,GO:0016301,GO:0016310,GO:0016740,GO:0016772,GO:0016781,GO:0019318,GO:0019319,GO:0043167,GO:0043169,GO:0044237,GO:0044238,GO:0044281,GO:0044283,GO:0044424,GO:0044444,GO:…	2.7.9.2	ko:K01007	ko00620,ko00680,ko00720,ko01100,ko01120,ko01200,map00620,map00680,map00720,map01100,map01120,map01200	M00173,M00374	R00199	RC00002,RC00015	ko00000,ko00001,ko00002,ko01000			iEcE24377_1341.EcE24377A_1919,iYL1228.KPN_02160	Bacteria	1MU0R@1224,1RP3T@1236,COG0574@1,COG0574@2,COG1080@1,COG1080@2	NA|NA|NA	H	Catalyzes the phosphorylation of pyruvate to phosphoenolpyruvate	PIRSF, Gene3D, Gene3D, Pfam, TIGRFAM, ProSitePatterns, Pfam, SUPERFAMILY, Gene3D, SUPERFAMILY, Pfam, ProSitePatterns, SUPERFAMILY, PANTHER, Gene3D	PIRSF000854, G3DSA:3.20.20.60, G3DSA:3.30.470.20, PF02896, TIGR01418, PS00742, PF01326, SSF56059, G3DSA:3.30.1490.20, SSF52009, PF00391, PS00370, SSF51621, PTHR43030, G3DSA:3.50.30.10	PEP-utilising enzyme, TIM barrel domain, PEP_synth: phosphoenolpyruvate synthase, PEP-utilizing enzymes signature 2., Pyruvate phosphate dikinase, PEP/pyruvate binding domain, PEP-utilising enzyme, mobile domain, PEP-utilizing enzymes phosphorylation site signature.	IPR006319, IPR000121, IPR006319, IPR023151, IPR002192, IPR013815, IPR036637, IPR008279, IPR018274, IPR015813, IPR006319	Phosphoenolpyruvate synthase, PEP-utilising enzyme, C-terminal, Phosphoenolpyruvate synthase, PEP-utilising enzyme, conserved site, Pyruvate phosphate dikinase, PEP/pyruvate-binding, ATP-grasp fold, subdomain 1, Phosphohistidine domain superfamily, PEP-utilising enzyme, mobile domain, PEP-utilising enzyme, active site, Pyruvate/Phosphoenolpyruvate kinase-like domain superfamily, Phosphoenolpyruva…	GO:0006090, GO:0008986, GO:0016310, GO:0016772, GO:0006090, GO:0008986, GO:0016772, GO:0005524, GO:0016301, GO:0016310, GO:0005524, GO:0016310, GO:0016772, GO:0016310, GO:0016772, GO:0016310, GO:0016772, GO:0003824, GO:0006090, GO:0008986	KEGG: 00620+2.7.9.2|KEGG: 00680+2.7.9.2|KEGG: 00720+2.7.9.2|MetaCyc: PWY-5484|MetaCyc: PWY-6142, KEGG: 00620+2.7.9.2|KEGG: 00680+2.7.9.2|KEGG: 00720+2.7.9.2|MetaCyc: PWY-5484|MetaCyc: PWY-6142, KEGG: 00620+2.7.9.2|KEGG: 00680+2.7.9.2|KEGG: 00720+2.7.9.2|MetaCyc: PWY-5484|MetaCyc: PWY-6142
NZ_CP050969.1_162_27	1115512.EH105704_01_00540	5.4e-110	404.1	Escherichia	ydiA	GO:0003674,GO:0005575,GO:0005622,GO:0005623,GO:0005737,GO:0005829,GO:0008150,GO:0030234,GO:0044424,GO:0044444,GO:0044464,GO:0050790,GO:0065007,GO:0065009,GO:0098772	2.7.11.33,2.7.4.28	ko:K09773					ko00000,ko01000				Bacteria	1MUHU@1224,1RPHX@1236,3XN7K@561,COG1806@1,COG1806@2	NA|NA|NA	F	Bifunctional serine threonine kinase and phosphorylase involved in the regulation of the phosphoenolpyruvate synthase (PEPS) by catalyzing its phosphorylation dephosphorylation	Hamap, PANTHER, Pfam	MF_01062, PTHR31756, PF03618	Phosphoenolpyruvate synthase regulatory protein [ppsR]., Kinase/pyrophosphorylase	IPR026530, IPR005177, IPR005177	Phosphoenolpyruvate synthase regulatory protein, Bifunctional kinase-pyrophosphorylase, Bifunctional kinase-pyrophosphorylase	GO:0005524, GO:0016772, GO:0005524, GO:0016772
NZ_CP050969.1_162_28	1249634.D781_2019	3.9e-158	564.3	Serratia	aroH	GO:0003674,GO:0003824,GO:0003849,GO:0005488,GO:0005515,GO:0005575,GO:0005622,GO:0005623,GO:0005737,GO:0006082,GO:0006520,GO:0006725,GO:0006807,GO:0008150,GO:0008152,GO:0008652,GO:0009058,GO:0009072,GO:0009073,GO:0009987,GO:0016053,GO:0016740,GO:0016765,GO:0019438,GO:0019752,GO:0042802,GO:0043436,GO:0044237,GO:0044238,GO:0044249,GO:0044281,GO:0044283,GO:0044424,GO:0044464,GO:0046394,GO:0071704,GO:…	2.5.1.54	ko:K01626	ko00400,ko01100,ko01110,ko01130,ko01230,ko02024,map00400,map01100,map01110,map01130,map01230,map02024	M00022	R01826	RC00435	ko00000,ko00001,ko00002,ko01000			iSbBS512_1146.SbBS512_E1908	Bacteria	1MU5Q@1224,1RMAA@1236,400QZ@613,COG0722@1,COG0722@2	NA|NA|NA	E	Stereospecific condensation of phosphoenolpyruvate (PEP) and D-erythrose-4-phosphate (E4P) giving rise to 3-deoxy-D- arabino-heptulosonate-7-phosphate (DAHP)	TIGRFAM, SUPERFAMILY, PANTHER, PANTHER, Gene3D, Pfam, PIRSF	TIGR00034, SSF51569, PTHR21225:SF6, PTHR21225, G3DSA:3.20.20.70, PF00793, PIRSF001361	aroFGH: 3-deoxy-7-phosphoheptulonate synthase,DAHP synthetase I family	IPR006219, IPR006219, IPR013785, IPR006218, IPR006219	DHAP synthase, class 1, DHAP synthase, class 1, Aldolase-type TIM barrel, DAHP synthetase I/KDSA, DHAP synthase, class 1	GO:0003849, GO:0009073, GO:0003849, GO:0009073, GO:0003824, GO:0009058, GO:0003849, GO:0009073	KEGG: 00400+2.5.1.54|MetaCyc: PWY-6164, KEGG: 00400+2.5.1.54|MetaCyc: PWY-6164, KEGG: 00540+2.5.1.55|MetaCyc: PWY-1269|MetaCyc: PWY-7674, KEGG: 00400+2.5.1.54|MetaCyc: PWY-6164
NZ_CP050969.1_162_29	1217718.ALOU01000019_gene2606	1.3e-25	122.9	Burkholderiaceae	pspA	GO:0005575,GO:0005622,GO:0005623,GO:0005737,GO:0005829,GO:0044424,GO:0044444,GO:0044464		ko:K03969					ko00000				Bacteria	1K8SM@119060,1NZH3@1224,2W39H@28216,COG1842@1,COG1842@2	NA|NA|NA	KT	Lecithin retinol acyltransferase	Gene3D, PANTHER, PANTHER, Pfam	G3DSA:3.90.1720.10, PTHR13943:SF47, PTHR13943, PF04970	Lecithin retinol acyltransferase	IPR007053	LRAT-like domain
NZ_CP050969.1_162_3	520999.PROVALCAL_00742	4e-95	355.1	Providencia	intE			ko:K21039					ko00000,ko01000				Bacteria	1MX7E@1224,1RNX5@1236,3Z97K@586,COG0582@1,COG0582@2	NA|NA|NA	L	Belongs to the phage integrase family	Gene3D, Gene3D, PANTHER, Pfam, PANTHER, SUPERFAMILY, SUPERFAMILY, Gene3D, Pfam	G3DSA:1.10.443.10, G3DSA:1.10.150.130, PTHR30629:SF2, PF09003, PTHR30629, SSF54171, SSF56349, G3DSA:3.30.160.60, PF00589	Bacteriophage lambda integrase, Arm DNA-binding domain,Phage integrase family	IPR013762, IPR010998, IPR015094, IPR016177, IPR011010, IPR002104	Integrase-like, catalytic domain superfamily, Integrase/recombinase, N-terminal, Integrase, lambda-type, N-terminal DNA-binding, DNA-binding domain superfamily, DNA breaking-rejoining enzyme, catalytic core, Integrase, catalytic domain	GO:0003677, GO:0006310, GO:0015074, GO:0003677, GO:0008907, GO:0015074, GO:0003677, GO:0003677, GO:0003677, GO:0006310, GO:0015074
NZ_CP050969.1_162_30	595494.Tola_2810	2.3e-246	858.2	Aeromonadales	ydcP			ko:K08303	ko05120,map05120				ko00000,ko00001,ko01000,ko01002				Bacteria	1MUQG@1224,1RN7S@1236,1Y45V@135624,COG0826@1,COG0826@2	NA|NA|NA	O	Collagenase	PANTHER, PANTHER, Pfam, ProSitePatterns, Pfam, PANTHER, PANTHER	PTHR30217:SF10, PTHR30217:SF10, PF12392, PS01276, PF01136, PTHR30217, PTHR30217	Collagenase, Peptidase family U32 signature., Peptidase family U32	IPR020988, IPR001539, IPR001539	Peptidase U32, collagenase, Peptidase U32, Peptidase U32	GO:0006508, GO:0008233, GO:0006508, GO:0008233
NZ_CP050969.1_162_32	1005994.GTGU_00389	3.5e-33	147.9	Gammaproteobacteria	hns	GO:0000976,GO:0001067,GO:0001130,GO:0001217,GO:0003674,GO:0003676,GO:0003677,GO:0003681,GO:0003690,GO:0003700,GO:0005488,GO:0005515,GO:0005575,GO:0005622,GO:0005623,GO:0005737,GO:0005829,GO:0006355,GO:0008150,GO:0009889,GO:0009890,GO:0009892,GO:0010468,GO:0010556,GO:0010558,GO:0010605,GO:0010629,GO:0019219,GO:0019222,GO:0031323,GO:0031324,GO:0031326,GO:0031327,GO:0032991,GO:0032993,GO:0042802,GO:…		ko:K03746					ko00000,ko03036,ko03400				Bacteria	1R9YM@1224,1S24H@1236,COG2916@1,COG2916@2	NA|NA|NA	K	Belongs to the histone-like protein H-NS family	Coils, Gene3D, PANTHER, SUPERFAMILY, Pfam, SUPERFAMILY, SMART, Gene3D, PIRSF, PANTHER	Coil, G3DSA:1.10.287.1050, PTHR38097:SF1, SSF81273, PF00816, SSF81273, SM00528, G3DSA:4.10.430.10, PIRSF002096, PTHR38097	H-NS histone family,nan]	IPR027454, IPR001801, IPR027444, IPR037150, IPR001801	Histone-like protein H-NS, N-terminal, Histone-like protein H-NS, Histone-like protein H-NS, C-terminal domain, Histone-like protein H-NS, C-terminal domain superfamily, Histone-like protein H-NS	GO:0046983, GO:0003677, GO:0005622, GO:0006355, GO:0003677, GO:0003677, GO:0003677, GO:0005622, GO:0006355
NZ_CP050969.1_162_33	82995.CR62_08605	8.9e-124	450.3	Serratia	rlmG	GO:0000154,GO:0001510,GO:0003674,GO:0003824,GO:0005575,GO:0005622,GO:0005623,GO:0005737,GO:0005829,GO:0006139,GO:0006364,GO:0006396,GO:0006725,GO:0006807,GO:0008150,GO:0008152,GO:0008168,GO:0008170,GO:0008173,GO:0008649,GO:0008757,GO:0008990,GO:0009451,GO:0009987,GO:0010467,GO:0016070,GO:0016072,GO:0016435,GO:0016740,GO:0016741,GO:0022613,GO:0031167,GO:0032259,GO:0034470,GO:0034641,GO:0034660,GO:…	2.1.1.172,2.1.1.174	ko:K00564,ko:K11391			R07234	RC00003	ko00000,ko01000,ko03009				Bacteria	1NEMR@1224,1RMXE@1236,40285@613,COG2813@1,COG2813@2	NA|NA|NA	J	Specifically methylates the guanine in position 1835 (m2G1835) of 23S rRNA	Hamap, PIRSF, CDD, SUPERFAMILY, Pfam, PANTHER, Gene3D, ProSitePatterns, Gene3D, PANTHER	MF_01859, PIRSF037565, cd02440, SSF53335, PF05175, PTHR18895, G3DSA:3.40.50.150, PS00092, G3DSA:3.40.50.150, PTHR18895:SF6	Ribosomal RNA large subunit methyltransferase G [rlmG]., AdoMet_MTases, Methyltransferase small domain, N-6 Adenine-specific DNA methylases signature.	IPR017237, IPR017237, IPR029063, IPR007848, IPR002052, IPR017237	rRNA (guanine-N2-)-methyltransferase, RsmD, rRNA (guanine-N2-)-methyltransferase, RsmD, S-adenosyl-L-methionine-dependent methyltransferase, Methyltransferase small domain, DNA methylase, N-6 adenine-specific, conserved site, rRNA (guanine-N2-)-methyltransferase, RsmD	GO:0005737, GO:0008990, GO:0031167, GO:0005737, GO:0008990, GO:0031167, GO:0008168, GO:0003676, GO:0008168, GO:0032259, GO:0005737, GO:0008990, GO:0031167
NZ_CP050969.1_162_34	667121.ET1_07_01440	8.2e-177	626.7	Gammaproteobacteria	yuiF			ko:K07084					ko00000,ko02000	2.A.8.1.12		iSB619.SA_RS04585	Bacteria	1N8U2@1224,1RRW5@1236,COG2056@1,COG2056@2	NA|NA|NA	S	antiporter	PANTHER, Pfam, PRINTS, PRINTS, PRINTS, Pfam	PTHR37821, PF03553, PR00173, PR00173, PR00173, PF13726	Na+/H+ antiporter family, Glutamate-aspartate symporter signature, Glutamate-aspartate symporter signature, Glutamate-aspartate symporter signature, Na+-H+ antiporter family	IPR018461, IPR032813	Na+/H+ antiporter, NhaC-like, C-terminal, Putative Na+/H+ antiporter, N-terminal	GO:0016021, nan]
NZ_CP050969.1_162_35	179408.Osc7112_0286	1.9e-24	119.4	Oscillatoriales				ko:K09932					ko00000				Bacteria	1G3P9@1117,1HC0H@1150,COG3224@1,COG3224@2	NA|NA|NA	S	Antibiotic biosynthesis monooxygenase	PANTHER, Pfam, SUPERFAMILY	PTHR40057, PF03992, SSF54909	Antibiotic biosynthesis monooxygenase	IPR038762, IPR007138, IPR011008	Antibiotic biosynthesis monooxygenase, predicted, Antibiotic biosynthesis monooxygenase domain, Dimeric alpha-beta barrel
NZ_CP050969.1_162_36	557598.LHK_00714	7.2e-180	637.1	Betaproteobacteria	cueO												Bacteria	1MU0J@1224,2VH96@28216,COG2132@1,COG2132@2	NA|NA|NA	Q	copper-resistance protein, CopA family	ProSitePatterns, SUPERFAMILY, PANTHER, ProSitePatterns, SUPERFAMILY, Pfam, ProSitePatterns, ProSiteProfiles, Pfam, Gene3D, SUPERFAMILY, Gene3D, Pfam, CDD, Gene3D	PS00079, SSF49503, PTHR11709, PS00080, SSF49503, PF07732, PS00079, PS51318, PF07731, G3DSA:2.60.40.420, SSF49503, G3DSA:2.60.40.420, PF00394, cd13896, G3DSA:2.60.40.420	Multicopper oxidases signature 1., Multicopper oxidases signature 2., Multicopper oxidase, Multicopper oxidases signature 1., Twin arginine translocation (Tat) signal profile., Multicopper oxidase, Multicopper oxidase, CuRO_3_CopA	IPR033138, IPR008972, IPR002355, IPR008972, IPR011707, IPR033138, IPR006311, IPR011706, IPR008972, IPR008972, IPR008972, IPR001117, IPR034279, IPR008972	Multicopper oxidases, conserved site, Cupredoxin, Multicopper oxidase, copper-binding site, Cupredoxin, Multicopper oxidase, type 3, Multicopper oxidases, conserved site, Twin-arginine translocation pathway, signal sequence, Multicopper oxidase, type 2, Cupredoxin, Cupredoxin, Cupredoxin, Multicopper oxidase, type 1, Copper resistance protein, third cupredoxin domain, Cupredoxin	GO:0005507, GO:0005507, GO:0005507, GO:0016491, GO:0055114, GO:0055114, GO:0005507
NZ_CP050969.1_162_37	1144319.PMI16_04276	1.1e-88	333.6	Oxalobacteraceae	yedI	GO:0005575,GO:0005623,GO:0005886,GO:0016020,GO:0044464,GO:0071944		ko:K09781					ko00000				Bacteria	1MVYU@1224,2VHTU@28216,476M8@75682,COG2354@1,COG2354@2	NA|NA|NA	S	Protein of unknown function (DUF808)	PIRSF, PANTHER, Pfam	PIRSF016660, PTHR30503, PF05661	Protein of unknown function (DUF808)	IPR008526, IPR008526, IPR008526	Inner membrane protein YedI, Inner membrane protein YedI, Inner membrane protein YedI
NZ_CP050969.1_162_38	1268237.G114_15056	1.7e-150	540	Proteobacteria	luxQ												Bacteria	1R5EN@1224,COG0642@1,COG0642@2,COG5002@1,COG5002@2	NA|NA|NA	T	Histidine kinase	CDD, SMART, SMART, PANTHER, PANTHER, PANTHER, Gene3D, Gene3D, CDD, Pfam, SUPERFAMILY, PRINTS, PRINTS, PRINTS, PRINTS, CDD, Pfam, Pfam, CDD, Pfam, SUPERFAMILY, ProSiteProfiles, SMART, ProSiteProfiles, Gene3D, Gene3D, SUPERFAMILY, SMART, ProSiteProfiles, SUPERFAMILY	cd00082, SM00448, SM00448, PTHR43719, PTHR43719, PTHR43719, G3DSA:1.10.287.130, G3DSA:3.30.565.10, cd00156, PF00512, SSF47384, PR00344, PR00344, PR00344, PR00344, cd00075, PF00072, PF00072, cd00156, PF02518, SSF52172, PS50110, SM00388, PS50109, G3DSA:3.40.50.2300, G3DSA:3.40.50.12740, SSF55874, SM00387, PS50110, SSF52172	HisKA, REC, His Kinase A (phospho-acceptor) domain, Bacterial sensor protein C-terminal signature, Bacterial sensor protein C-terminal signature, Bacterial sensor protein C-terminal signature, Bacterial sensor protein C-terminal signature, HATPase_c, Response regulator receiver domain, Response regulator receiver domain, REC, Histidine kinase-, DNA gyrase B-, and HSP90-like ATPase, Response regul…	IPR003661, IPR001789, IPR001789,IPR036890, IPR001789, IPR003661, IPR036097, IPR004358, IPR004358, IPR004358, IPR004358, IPR003594, IPR001789, IPR001789, IPR001789, IPR003594, IPR011006, IPR001789, IPR003661, IPR005467, IPR036890, IPR003594, IPR001789, IPR011006	Signal transduction histidine kinase, dimerisation/phosphoacceptor domain, Signal transduction response regulator, receiver domain, Signal transduction response regulator, receiver domain,Histidine kinase/HSP90-like ATPase superfamily, Signal transduction response regulator, receiver domain, Signal transduction histidine kinase, dimerisation/phosphoacceptor domain, Signal transduction histidine k…	GO:0000155, GO:0007165, GO:0000160, GO:0000160, GO:0000160, GO:0000155, GO:0007165, GO:0000155, GO:0007165, GO:0016310, GO:0016772, GO:0016310, GO:0016772, GO:0016310, GO:0016772, GO:0016310, GO:0016772, GO:0000160, GO:0000160, GO:0000160, GO:0000160, GO:0000155, GO:0007165, GO:0000160	Reactome: R-HSA-70895, Reactome: R-HSA-70895, Reactome: R-HSA-70895, Reactome: R-HSA-70895, Reactome: R-HSA-204174|Reactome: R-HSA-5362517
NZ_CP050969.1_162_39	1121935.AQXX01000084_gene5375	5.4e-39	167.5	Oceanospirillales													Bacteria	1RHJS@1224,1S0M5@1236,1XM4W@135619,COG3915@1,COG3915@2	NA|NA|NA	S	protein conserved in bacteria	SUPERFAMILY, Pfam	SSF56524, PF00174	Oxidoreductase molybdopterin binding domain	IPR036374, IPR000572	Oxidoreductase, molybdopterin-binding domain superfamily, Oxidoreductase, molybdopterin-binding domain	GO:0042128, GO:0042128	Reactome: R-HSA-1614517, Reactome: R-HSA-1614517
NZ_CP050969.1_162_4	273526.SMDB11_1310	2.9e-216	757.7	Serratia	icd	GO:0003674,GO:0003824,GO:0004448,GO:0004450,GO:0005575,GO:0005622,GO:0005623,GO:0005737,GO:0005829,GO:0006091,GO:0006950,GO:0006979,GO:0008150,GO:0008152,GO:0009987,GO:0016491,GO:0016614,GO:0016616,GO:0022900,GO:0044237,GO:0044424,GO:0044444,GO:0044464,GO:0050896,GO:0055114	1.1.1.42	ko:K00031	ko00020,ko00480,ko00720,ko01100,ko01110,ko01120,ko01130,ko01200,ko01210,ko01230,ko04146,map00020,map00480,map00720,map01100,map01110,map01120,map01130,map01200,map01210,map01230,map04146	M00009,M00010,M00173,M00740	R00267,R00268,R01899	RC00001,RC00084,RC00114,RC00626,RC02801	br01601,ko00000,ko00001,ko00002,ko01000			e_coli_core.b1136,iAF1260.b1136,iECDH1ME8569_1439.ECDH1ME8569_1071,iEcDH1_1363.EcDH1_2511,iJO1366.b1136,iJR904.b1136,iY75_1357.Y75_RS05930,iYL1228.KPN_01144	Bacteria	1MW3J@1224,1RNMD@1236,402ND@613,COG0538@1,COG0538@2	NA|NA|NA	C	Isocitrate dehydrogenase	PANTHER, ProSitePatterns, Gene3D, SUPERFAMILY, Pfam, TIGRFAM, SMART	PTHR43504, PS00470, G3DSA:3.40.718.10, SSF53659, PF00180, TIGR00183, SM01329	Isocitrate and isopropylmalate dehydrogenases signature., Isocitrate/isopropylmalate dehydrogenase, prok_nadp_idh: isocitrate dehydrogenase, NADP-dependent	IPR004439, IPR019818, IPR024084, IPR004439, IPR024084	Isocitrate dehydrogenase NADP-dependent, dimeric, prokaryotic, Isocitrate/isopropylmalate dehydrogenase, conserved site, Isopropylmalate dehydrogenase-like domain, Isocitrate dehydrogenase NADP-dependent, dimeric, prokaryotic, Isopropylmalate dehydrogenase-like domain	GO:0004450, GO:0006099, GO:0055114, GO:0000287, GO:0016616, GO:0051287, GO:0055114, GO:0016616, GO:0055114, GO:0004450, GO:0006099, GO:0055114, GO:0016616, GO:0055114	KEGG: 00020+1.1.1.42|KEGG: 00480+1.1.1.42|KEGG: 00720+1.1.1.42|MetaCyc: PWY-5913|MetaCyc: PWY-6549|MetaCyc: PWY-6728|MetaCyc: PWY-6969|MetaCyc: PWY-7124|MetaCyc: PWY-7254|MetaCyc: PWY-7268, Reactome: R-HSA-71403, Reactome: R-HSA-71403, KEGG: 00020+1.1.1.42|KEGG: 00480+1.1.1.42|KEGG: 00720+1.1.1.42|MetaCyc: PWY-5913|MetaCyc: PWY-6549|MetaCyc: PWY-6728|MetaCyc: PWY-6969|MetaCyc: PWY-7124|MetaCyc: P…
NZ_CP050969.1_162_40	380703.AHA_1576	1.4e-12	79.3	Aeromonadales													Bacteria	1NH5B@1224,1SGR8@1236,1Y68K@135624,COG2198@1,COG2198@2	NA|NA|NA	T	Histidine Phosphotransfer domain	CDD, SUPERFAMILY, Gene3D, ProSiteProfiles, Pfam	cd00088, SSF47226, G3DSA:1.20.120.160, PS50894, PF01627	HPT, Histidine-containing phosphotransfer (HPt) domain profile., Hpt domain	IPR008207, IPR036641, IPR036641, IPR008207, IPR008207	Signal transduction histidine kinase, phosphotransfer (Hpt) domain, HPT domain superfamily, HPT domain superfamily, Signal transduction histidine kinase, phosphotransfer (Hpt) domain, Signal transduction histidine kinase, phosphotransfer (Hpt) domain	GO:0000160, GO:0000160, GO:0000160, GO:0000160, GO:0000160
NZ_CP050969.1_162_41	29486.NJ56_07145	6.7e-173	613.6	Yersinia	pepT	GO:0003674,GO:0003824,GO:0004177,GO:0005575,GO:0005622,GO:0005623,GO:0005737,GO:0005829,GO:0006508,GO:0006518,GO:0006807,GO:0008150,GO:0008152,GO:0008233,GO:0008238,GO:0009987,GO:0016787,GO:0019538,GO:0034641,GO:0034701,GO:0043170,GO:0043603,GO:0044237,GO:0044238,GO:0044424,GO:0044444,GO:0044464,GO:0045148,GO:0070011,GO:0071704,GO:0140096,GO:1901564	3.4.11.4	ko:K01258					ko00000,ko01000,ko01002				Bacteria	1MV7D@1224,1RMKZ@1236,41ERH@629,COG2195@1,COG2195@2	NA|NA|NA	E	Cleaves the N-terminal amino acid of tripeptides	SUPERFAMILY, TIGRFAM, ProSitePatterns, Gene3D, Hamap, Gene3D, PIRSF, PANTHER, Pfam, CDD, Pfam, SUPERFAMILY, ProSitePatterns, PANTHER	SSF53187, TIGR01882, PS00758, G3DSA:3.40.630.10, MF_00550, G3DSA:3.30.70.360, PIRSF037215, PTHR42994, PF01546, cd03892, PF07687, SSF55031, PS00759, PTHR42994:SF1	peptidase-T: peptidase T, ArgE / dapE / ACY1 / CPG2 / yscS family signature 1., Peptidase T [pepT]., Peptidase family M20/M25/M40, M20_peptT, Peptidase dimerisation domain, ArgE / dapE / ACY1 / CPG2 / yscS family signature 2.	IPR010161, IPR001261, IPR010161, IPR010161, IPR002933, IPR010161, IPR011650, IPR036264, IPR001261, IPR010161	Peptidase M20B, tripeptide aminopeptidase, ArgE/DapE/ACY1/CPG2/YscS, conserved site, Peptidase M20B, tripeptide aminopeptidase, Peptidase M20B, tripeptide aminopeptidase, Peptidase M20, Peptidase M20B, tripeptide aminopeptidase, Peptidase M20, dimerisation domain, Bacterial exopeptidase dimerisation domain, ArgE/DapE/ACY1/CPG2/YscS, conserved site, Peptidase M20B, tripeptide aminopeptidase	GO:0005737, GO:0006518, GO:0008270, GO:0045148, GO:0006508, GO:0008237, GO:0005737, GO:0006518, GO:0008270, GO:0045148, GO:0005737, GO:0006518, GO:0008270, GO:0045148, GO:0016787, GO:0005737, GO:0006518, GO:0008270, GO:0045148, GO:0006508, GO:0008237, GO:0005737, GO:0006518, GO:0008270, GO:0045148
NZ_CP050969.1_162_42	1190606.AJYG01000069_gene681	4.8e-19	101.7	Vibrionales	VV1682												Bacteria	1RHAD@1224,1S11Z@1236,1XUK1@135623,28IUI@1,2Z8T7@2	NA|NA|NA	S	Protein of unknown function (DUF2987)	Pfam	PF11205	Protein of unknown function (DUF2987)	IPR021370	Protein of unknown function DUF2987
NZ_CP050969.1_162_43	1214065.BAGV01000014_gene2947	8.7e-172	609.8	Gammaproteobacteria	potA	GO:0000166,GO:0003674,GO:0003824,GO:0005215,GO:0005488,GO:0005524,GO:0005575,GO:0005623,GO:0005886,GO:0006810,GO:0006811,GO:0006812,GO:0008144,GO:0008150,GO:0008324,GO:0008519,GO:0015075,GO:0015101,GO:0015203,GO:0015399,GO:0015405,GO:0015417,GO:0015595,GO:0015606,GO:0015695,GO:0015696,GO:0015846,GO:0015847,GO:0015848,GO:0016020,GO:0016021,GO:0016462,GO:0016787,GO:0016817,GO:0016818,GO:0016887,GO:…	3.6.3.31	ko:K11072	ko02010,map02010	M00299			ko00000,ko00001,ko00002,ko01000,ko02000	3.A.1.11.1		iB21_1397.B21_01132,iECBD_1354.ECBD_2473,iECB_1328.ECB_01124,iECD_1391.ECD_01124,iECO111_1330.ECO111_1474,iECO26_1355.ECO26_1643,iEcHS_1320.EcHS_A1246,iEcolC_1368.EcolC_2477,iSBO_1134.SBO_1915,iSSON_1240.SSON_1144,iSbBS512_1146.SbBS512_E1304,iUMNK88_1353.UMNK88_1456	Bacteria	1MU3I@1224,1RNPX@1236,COG3842@1,COG3842@2	NA|NA|NA	P	Part of the ABC transporter complex PotABCD involved in spermidine putrescine import. Responsible for energy coupling to the transport system	SUPERFAMILY, Pfam, PANTHER, Pfam, ProSiteProfiles, ProSitePatterns, ProSiteProfiles, CDD, PANTHER, Gene3D, SUPERFAMILY, SMART, TIGRFAM, Gene3D	SSF50331, PF00005, PTHR42781:SF4, PF08402, PS50893, PS00211, PS51305, cd03300, PTHR42781, G3DSA:2.40.50.940, SSF52540, SM00382, TIGR01187, G3DSA:3.40.50.300	ABC transporter, TOBE domain, ATP-binding cassette, ABC transporter-type domain profile., ABC transporters family signature., Spermidine/putrescine import ATP-binding protein potA family profile., ABC_PotA_N,potA: polyamine ABC transporter, ATP-binding protein	IPR008995, IPR003439, IPR013611, IPR003439, IPR017871, IPR017879, IPR027417, IPR003593, IPR005893	Molybdate/tungstate binding, C-terminal, ABC transporter-like, Transport-associated OB, type 2, ABC transporter-like, ABC transporter, conserved site, ABC transporter, spermidine/putrescine import ATP-binding protein, PotA, P-loop containing nucleoside triphosphate hydrolase, AAA+ ATPase domain, Spermidine/putrescine ABC transporter, ATP-binding subunit	GO:0005524, GO:0016887, GO:0005524, GO:0022857, GO:0043190, GO:0055085, GO:0005524, GO:0016887, GO:0005524, GO:0016887, GO:0015594, GO:0015595, GO:0015846, GO:0016020, GO:0015417, GO:0015846, GO:0043190
NZ_CP050969.1_162_44	1056512.D515_00297	1.7e-119	435.6	Vibrionales	potB	GO:0003674,GO:0003824,GO:0005215,GO:0005575,GO:0005623,GO:0005886,GO:0005887,GO:0006810,GO:0006811,GO:0006812,GO:0008150,GO:0008324,GO:0008519,GO:0015075,GO:0015101,GO:0015203,GO:0015399,GO:0015405,GO:0015417,GO:0015595,GO:0015606,GO:0015695,GO:0015696,GO:0015846,GO:0015847,GO:0015848,GO:0016020,GO:0016021,GO:0016462,GO:0016787,GO:0016817,GO:0016818,GO:0016887,GO:0017111,GO:0022804,GO:0022857,GO:…		ko:K11071	ko02010,map02010	M00299			ko00000,ko00001,ko00002,ko02000	3.A.1.11.1		iE2348C_1286.E2348C_1266,iECUMN_1333.ECUMN_1368,iSBO_1134.SBO_1916	Bacteria	1MVGM@1224,1RNNZ@1236,1XSQ9@135623,COG1176@1,COG1176@2	NA|NA|NA	P	Spermidine putrescine ABC transporter	CDD, Coils, ProSiteProfiles, SUPERFAMILY, PANTHER, Gene3D, PANTHER, Pfam	cd06261, Coil, PS50928, SSF161098, PTHR42929, G3DSA:1.10.3720.10, PTHR42929:SF1, PF00528	TM_PBP2, ABC transporter integral membrane type-1 domain profile.,Binding-protein-dependent transport system inner membrane component	IPR000515, IPR000515, IPR035906, IPR035906, IPR000515	ABC transporter type 1, transmembrane domain MetI-like, ABC transporter type 1, transmembrane domain MetI-like, MetI-like superfamily, MetI-like superfamily, ABC transporter type 1, transmembrane domain MetI-like	GO:0016020, GO:0055085, GO:0016020, GO:0055085,GO:0016020, GO:0055085
NZ_CP050969.1_162_45	1453496.AT03_10235	2.1e-108	398.7	Gammaproteobacteria	potC	GO:0003674,GO:0003824,GO:0005215,GO:0005575,GO:0005623,GO:0005886,GO:0005887,GO:0006810,GO:0006811,GO:0006812,GO:0008150,GO:0008324,GO:0008519,GO:0015075,GO:0015101,GO:0015203,GO:0015399,GO:0015405,GO:0015417,GO:0015595,GO:0015606,GO:0015695,GO:0015696,GO:0015846,GO:0015847,GO:0015848,GO:0016020,GO:0016021,GO:0016462,GO:0016787,GO:0016817,GO:0016818,GO:0016887,GO:0017111,GO:0022804,GO:0022857,GO:…		ko:K11070,ko:K11074	ko02010,map02010	M00299,M00300			ko00000,ko00001,ko00002,ko02000	3.A.1.11.1,3.A.1.11.2		iSBO_1134.SBO_1939	Bacteria	1MVC5@1224,1RQB7@1236,COG1177@1,COG1177@2	NA|NA|NA	P	ABC-type spermidine putrescine transport system, permease component II	ProSiteProfiles, CDD, PANTHER, Pfam, PANTHER, Gene3D, SUPERFAMILY	PS50928, cd06261, PTHR43848:SF3, PF00528, PTHR43848, G3DSA:1.10.3720.10, SSF161098	ABC transporter integral membrane type-1 domain profile., TM_PBP2, Binding-protein-dependent transport system inner membrane component	IPR000515, IPR000515, IPR000515, IPR035906, IPR035906	ABC transporter type 1, transmembrane domain MetI-like, ABC transporter type 1, transmembrane domain MetI-like, ABC transporter type 1, transmembrane domain MetI-like, MetI-like superfamily, MetI-like superfamily	GO:0016020, GO:0055085, GO:0016020, GO:0055085, GO:0016020, GO:0055085
NZ_CP050969.1_162_46	469595.CSAG_00915	2e-157	562	Citrobacter	potD	GO:0003674,GO:0005488,GO:0005575,GO:0005623,GO:0006810,GO:0006811,GO:0006812,GO:0008150,GO:0015695,GO:0015696,GO:0015846,GO:0015847,GO:0015848,GO:0019808,GO:0019809,GO:0019810,GO:0030288,GO:0030313,GO:0031975,GO:0042597,GO:0043167,GO:0043169,GO:0044464,GO:0051179,GO:0051234,GO:0070405,GO:0071702,GO:0071705		ko:K11069,ko:K11070	ko02010,map02010	M00299			ko00000,ko00001,ko00002,ko02000	3.A.1.11.1		iSbBS512_1146.SbBS512_E2202	Bacteria	1MUYW@1224,1RM7W@1236,3WW6S@544,COG0687@1,COG0687@2	NA|NA|NA	P	Required for the activity of the bacterial periplasmic transport system of putrescine	Gene3D, PANTHER, PANTHER, PRINTS, PRINTS, PRINTS, PRINTS, PRINTS, PRINTS, PRINTS, PRINTS, PRINTS, PRINTS, SUPERFAMILY, Pfam, PIRSF, Gene3D	G3DSA:3.40.190.10, PTHR30222:SF5, PTHR30222, PR00909, PR00909, PR00909, PR00909, PR00909, PR00909, PR00909, PR00909, PR00909, PR00909, SSF53850, PF13343, PIRSF019574, G3DSA:3.40.190.10	Bacterial periplasmic spermidine/putrescine-binding protein signature, Bacterial periplasmic spermidine/putrescine-binding protein signature, Bacterial periplasmic spermidine/putrescine-binding protein signature, Bacterial periplasmic spermidine/putrescine-binding protein signature, Bacterial periplasmic spermidine/putrescine-binding protein signature, Bacterial periplasmic spermidine/putrescine-…	IPR001188, IPR001188, IPR001188, IPR001188, IPR001188, IPR001188, IPR001188, IPR001188, IPR001188, IPR001188, IPR001188	Bacterial periplasmic spermidine/putrescine-binding protein, Bacterial periplasmic spermidine/putrescine-binding protein, Bacterial periplasmic spermidine/putrescine-binding protein, Bacterial periplasmic spermidine/putrescine-binding protein, Bacterial periplasmic spermidine/putrescine-binding protein, Bacterial periplasmic spermidine/putrescine-binding protein, Bacterial periplasmic spermidine/…	GO:0015846, GO:0019808, GO:0042597, GO:0015846, GO:0019808, GO:0042597, GO:0015846, GO:0019808, GO:0042597, GO:0015846, GO:0019808, GO:0042597, GO:0015846, GO:0019808, GO:0042597, GO:0015846, GO:0019808, GO:0042597, GO:0015846, GO:0019808, GO:0042597, GO:0015846, GO:0019808, GO:0042597, GO:0015846, GO:0019808, GO:0042597, GO:0015846, GO:0019808, GO:0042597, GO:0015846, GO:0019808, GO:0042597
NZ_CP050969.1_162_5	716541.ECL_02499	1.3e-82	312.8	Enterobacter	rluE	GO:0000154,GO:0000455,GO:0001522,GO:0003674,GO:0003824,GO:0005575,GO:0005622,GO:0005623,GO:0005737,GO:0005829,GO:0006139,GO:0006364,GO:0006396,GO:0006725,GO:0006807,GO:0008150,GO:0008152,GO:0009451,GO:0009982,GO:0009987,GO:0010467,GO:0016070,GO:0016072,GO:0016853,GO:0016866,GO:0022613,GO:0031118,GO:0034470,GO:0034641,GO:0034660,GO:0042254,GO:0043170,GO:0043412,GO:0044085,GO:0044237,GO:0044238,GO:…	5.4.99.19,5.4.99.20,5.4.99.22	ko:K06178,ko:K06181,ko:K06183					ko00000,ko01000,ko03009				Bacteria	1R9VV@1224,1S1ZX@1236,3X1HE@547,COG1187@1,COG1187@2	NA|NA|NA	J	Belongs to the pseudouridine synthase RsuA family	ProSitePatterns, MobiDBLite, Pfam, MobiDBLite, Gene3D, CDD, Gene3D, PANTHER, TIGRFAM, SUPERFAMILY, PANTHER	PS01149, mobidb-lite, PF00849, mobidb-lite, G3DSA:3.30.70.580, cd02566, G3DSA:3.30.70.1560, PTHR21600:SF23, TIGR00093, SSF55120, PTHR21600	Rsu family of pseudouridine synthase signature., consensus disorder prediction, RNA pseudouridylate synthase, consensus disorder prediction, PseudoU_synth_RluE, TIGR00093: pseudouridine synthase	IPR018496, IPR006145, IPR000748, IPR020103, IPR000748	Pseudouridine synthase, RsuA/RluB/E/F, conserved site, Pseudouridine synthase, RsuA/RluB/C/D/E/F, Pseudouridine synthase, RsuA/RluB/E/F, Pseudouridine synthase, catalytic domain superfamily, Pseudouridine synthase, RsuA/RluB/E/F	GO:0001522, GO:0003723, GO:0009451, GO:0016866, GO:0001522, GO:0003723, GO:0009451, GO:0009982, GO:0001522, GO:0003723, GO:0009451, GO:0016866, GO:0001522, GO:0003723, GO:0009451, GO:0009982, GO:0001522, GO:0003723, GO:0009451, GO:0016866
NZ_CP050969.1_162_6	1249634.D781_1863	8.9e-43	179.9	Serratia	nudJ			ko:K12152					ko00000,ko01000				Bacteria	1QUCG@1224,1T1T8@1236,400MQ@613,COG0494@1,COG0494@2	NA|NA|NA	L	Belongs to the Nudix hydrolase family. NudJ subfamily	Pfam, SUPERFAMILY, CDD, PANTHER, ProSitePatterns, ProSiteProfiles, PANTHER, Gene3D	PF00293, SSF55811, cd03675, PTHR22769, PS00893, PS51462, PTHR22769:SF57, G3DSA:3.90.79.10	NUDIX domain, Nudix_Hydrolase_2, Nudix box signature., Nudix hydrolase domain profile.	IPR000086, IPR015797, IPR033713, IPR020084, IPR000086	NUDIX hydrolase domain, NUDIX hydrolase-like domain superfamily, Phosphatase NudJ, NUDIX hydrolase, conserved site, NUDIX hydrolase domain	GO:0016787, GO:0016787, GO:0004787, GO:0017110, GO:0017111, GO:0016787, GO:0016787
NZ_CP050969.1_162_7	1073999.BN137_1630	1.7e-180	638.6	Gammaproteobacteria	mnmA	GO:0001510,GO:0002097,GO:0002098,GO:0002143,GO:0003674,GO:0003824,GO:0004808,GO:0005575,GO:0005622,GO:0005623,GO:0005737,GO:0005829,GO:0006139,GO:0006396,GO:0006399,GO:0006400,GO:0006725,GO:0006807,GO:0008033,GO:0008150,GO:0008152,GO:0008168,GO:0008173,GO:0008175,GO:0008757,GO:0009451,GO:0009987,GO:0010467,GO:0016070,GO:0016740,GO:0016741,GO:0016782,GO:0016783,GO:0030488,GO:0032259,GO:0034227,GO:…	2.8.1.13	ko:K00566	ko04122,map04122		R08700	RC02313,RC02315	ko00000,ko00001,ko01000,ko03016				Bacteria	1MUT1@1224,1RMAK@1236,COG0482@1,COG0482@2	NA|NA|NA	J	Catalyzes the 2-thiolation of uridine at the wobble position (U34) of tRNA, leading to the formation of s(2)U34	PANTHER, Pfam, Gene3D, SUPERFAMILY, CDD, TIGRFAM, Hamap, Gene3D, Gene3D, PANTHER	PTHR11933, PF03054, G3DSA:3.40.50.620, SSF52402, cd01998, TIGR00420, MF_00144, G3DSA:2.40.30.10, G3DSA:2.30.30.280, PTHR11933:SF5	tRNA methyl transferase, tRNA_Me_trans, trmU: tRNA (5-methylaminomethyl-2-thiouridylate)-methyltransferase, tRNA-specific 2-thiouridylase MnmA [mnmA].	IPR004506, IPR014729, IPR004506, IPR004506, IPR004506, IPR023382	tRNA-specific 2-thiouridylase, Rossmann-like alpha/beta/alpha sandwich fold, tRNA-specific 2-thiouridylase, tRNA-specific 2-thiouridylase, tRNA-specific 2-thiouridylase, Adenine nucleotide alpha hydrolase-like domains	GO:0008033, GO:0016740, GO:0008033, GO:0016740, GO:0008033, GO:0016740, GO:0008033, GO:0016740, GO:0016783	MetaCyc: PWY-7887|MetaCyc: PWY-7892|Reactome: R-HSA-6787450, MetaCyc: PWY-7887|MetaCyc: PWY-7892|Reactome: R-HSA-6787450, MetaCyc: PWY-7887|MetaCyc: PWY-7892|Reactome: R-HSA-6787450, MetaCyc: PWY-7887|MetaCyc: PWY-7892|Reactome: R-HSA-6787450, MetaCyc: PWY-7887|MetaCyc: PWY-7892|Reactome: R-HSA-6787450
NZ_CP050969.1_162_8	1197719.A464_1169	1.9e-59	235.7	Salmonella	hflD	GO:0005575,GO:0005622,GO:0005623,GO:0005886,GO:0006950,GO:0008150,GO:0009266,GO:0009408,GO:0009628,GO:0009898,GO:0016020,GO:0019897,GO:0019898,GO:0031234,GO:0044424,GO:0044425,GO:0044459,GO:0044464,GO:0050896,GO:0071944,GO:0098552,GO:0098562	4.3.2.2	ko:K01756,ko:K07153	ko00230,ko00250,ko01100,ko01110,ko01130,map00230,map00250,map01100,map01110,map01130	M00048,M00049	R01083,R04559	RC00379,RC00444,RC00445	ko00000,ko00001,ko00002,ko01000				Bacteria	1RI8B@1224,1RPCC@1236,3ZM4D@590,COG2915@1,COG2915@2	NA|NA|NA	S	Protein of unknown function (DUF489)	Hamap, Gene3D, SUPERFAMILY, PANTHER, ProDom, Pfam	MF_00695, G3DSA:1.10.3890.10, SSF101322, PTHR38100, PD037115, PF04356	High frequency lysogenization protein HflD [hflD]., UPF0274 YCFC HI0638 METABOLISM UNCHARACTERIZED VV1342 PURINE INVOLVED SO2634 HFLD, Protein of unknown function (DUF489)	IPR007451, IPR035932, IPR035932, IPR007451, IPR007451	High frequency lysogenization protein HflD, HflD-like superfamily, HflD-like superfamily, High frequency lysogenization protein HflD, High frequency lysogenization protein HflD
NZ_CP050969.1_162_9	1441930.Z042_23610	2e-231	808.1	Serratia	purB	GO:0003674,GO:0003824,GO:0004018,GO:0005575,GO:0005622,GO:0005623,GO:0005737,GO:0005829,GO:0006950,GO:0006974,GO:0008150,GO:0009987,GO:0016829,GO:0016840,GO:0016842,GO:0033554,GO:0044424,GO:0044444,GO:0044464,GO:0050896,GO:0051716	4.3.2.2	ko:K01756	ko00230,ko00250,ko01100,ko01110,ko01130,map00230,map00250,map01100,map01110,map01130	M00048,M00049	R01083,R04559	RC00379,RC00444,RC00445	ko00000,ko00001,ko00002,ko01000			iAF1260.b1131,iBWG_1329.BWG_0979,iE2348C_1286.E2348C_1272,iEC042_1314.EC042_1202,iECABU_c1320.ECABU_c13450,iECDH10B_1368.ECDH10B_1203,iECP_1309.ECP_1126,iECUMN_1333.ECUMN_1375,iETEC_1333.ETEC_1255,iEcHS_1320.EcHS_A1251,iEcolC_1368.EcolC_2472,iJO1366.b1131,iJR904.b1131,iLF82_1304.LF82_1774,iNRG857_1313.NRG857_05460,iY75_1357.Y75_RS05905,ic_1306.c1510	Bacteria	1MV4B@1224,1RN93@1236,4029B@613,COG0015@1,COG0015@2	NA|NA|NA	F	Belongs to the lyase 1 family. Adenylosuccinate lyase subfamily	PANTHER, Pfam, Pfam, Gene3D, TIGRFAM, Gene3D, CDD, SUPERFAMILY, ProSitePatterns, PANTHER, Gene3D, PRINTS, PRINTS, PRINTS, PRINTS	PTHR43411:SF3, PF00206, PF08328, G3DSA:1.10.275.10, TIGR00928, G3DSA:1.20.200.10, cd01598, SSF48557, PS00163, PTHR43411, G3DSA:1.10.40.30, PR00149, PR00149, PR00149, PR00149	Lyase, Adenylosuccinate lyase C-terminal, purB: adenylosuccinate lyase, PurB, Fumarate lyases signature., Fumarate lyase superfamily signature, Fumarate lyase superfamily signature, Fumarate lyase superfamily signature, Fumarate lyase superfamily signature	IPR022761, IPR013539, IPR024083, IPR004769, IPR008948, IPR020557, IPR000362, IPR000362, IPR000362, IPR000362	Fumarate lyase, N-terminal, Adenylosuccinate lyase PurB, C-terminal, Fumarase/histidase, N-terminal, Adenylosuccinate lyase, L-Aspartase-like, Fumarate lyase, conserved site, Fumarate lyase family, Fumarate lyase family, Fumarate lyase family, Fumarate lyase family	GO:0004018, GO:0006188, GO:0004018, GO:0009152, GO:0003824, GO:0003824	KEGG: 00230+4.3.2.2|KEGG: 00250+4.3.2.2|MetaCyc: PWY-6123|MetaCyc: PWY-6124|MetaCyc: PWY-7219|MetaCyc: PWY-7234, KEGG: 00230+4.3.2.2|KEGG: 00250+4.3.2.2|MetaCyc: PWY-6123|MetaCyc: PWY-6124|MetaCyc: PWY-7219|MetaCyc: PWY-7234|Reactome: R-HSA-73817,nan]
NZ_CP050969.1_163_1	667121.ET1_06_00590	5.2e-101	374	Gammaproteobacteria	cobB	GO:0002252,GO:0002376,GO:0003674,GO:0003824,GO:0006464,GO:0006476,GO:0006807,GO:0006935,GO:0006950,GO:0006952,GO:0008150,GO:0008152,GO:0009605,GO:0009607,GO:0009615,GO:0009987,GO:0016787,GO:0016810,GO:0016811,GO:0018193,GO:0018205,GO:0019213,GO:0019538,GO:0033558,GO:0034979,GO:0034983,GO:0035601,GO:0036048,GO:0036049,GO:0036055,GO:0036211,GO:0040011,GO:0042221,GO:0042330,GO:0043170,GO:0043207,GO:…		ko:K12410					ko00000,ko01000				Bacteria	1MUK1@1224,1RMX5@1236,COG0846@1,COG0846@2	NA|NA|NA	K	NAD-dependent lysine deacetylase and desuccinylase that specifically removes acetyl and succinyl groups on target proteins. Modulates the activities of several proteins which are inactive in their acylated form	Gene3D, CDD, Hamap, ProSiteProfiles, Gene3D, SUPERFAMILY, PANTHER, Pfam, PANTHER	G3DSA:3.40.50.1220, cd01412, MF_01121, PS50305, G3DSA:3.30.1600.10, SSF52467, PTHR42984, PF02146, PTHR42984:SF1	SIRT5_Af1_CobB, NAD-dependent protein deacylase [cobB]., Sirtuin catalytic domain profile., Sir2 family	IPR027546, IPR027546, IPR026590, IPR026591, IPR029035, IPR003000	Sirtuin, class III, Sirtuin, class III, Sirtuin family, catalytic core domain, Sirtuin, catalytic core small domain superfamily, DHS-like NAD/FAD-binding domain superfamily, Sirtuin family	GO:0036054, GO:0036055, GO:0070403, GO:0036054, GO:0036055, GO:0070403,GO:0070403	Reactome: R-HSA-2151201, Reactome: R-HSA-2151201
NZ_CP050969.1_163_2	312309.VF_1408	5.9e-118	430.6	Vibrionales	nagK	GO:0003674,GO:0003824,GO:0005975,GO:0006793,GO:0006796,GO:0008150,GO:0008152,GO:0009987,GO:0016301,GO:0016310,GO:0016740,GO:0016772,GO:0019200,GO:0044237,GO:0044238,GO:0044262,GO:0045127,GO:0046835,GO:0071704	2.7.1.59	ko:K00884	ko00520,ko01100,map00520,map01100		R01201	RC00002,RC00017	ko00000,ko00001,ko01000			iE2348C_1286.E2348C_1211,iEcHS_1320.EcHS_A1241,iEcolC_1368.EcolC_2482	Bacteria	1MU94@1224,1RNHE@1236,1XSU2@135623,COG1940@1,COG1940@2	NA|NA|NA	F	Catalyzes the phosphorylation of N-acetyl-D-glucosamine (GlcNAc) derived from cell-wall degradation, yielding GlcNAc-6-P	Hamap, PANTHER, ProSitePatterns, Gene3D, CDD, SUPERFAMILY, Gene3D, PANTHER, Pfam	MF_01271, PTHR18964, PS01125, G3DSA:3.30.420.40, cd00012, SSF53067, G3DSA:3.30.420.40, PTHR18964:SF147, PF00480	N-acetyl-D-glucosamine kinase [nagK]., ROK family signature., NBD_sugar-kinase_HSP70_actin, ROK family	IPR023505, IPR000600, IPR000600, IPR000600	N-acetyl-D-glucosamine kinase, ROK family, ROK family, ROK family	GO:0045127	KEGG: 00520+2.7.1.59|MetaCyc: PWY-6517|MetaCyc: PWY-6906, Reactome: R-HSA-4085001|Reactome: R-HSA-4085011, Reactome: R-HSA-4085001|Reactome: R-HSA-4085011, Reactome: R-HSA-4085001|Reactome: R-HSA-4085011
NZ_CP050969.1_163_3	590409.Dd586_1683	1.3e-94	352.4	Dickeya	ribA	GO:0003674,GO:0003824,GO:0003933,GO:0003935,GO:0006766,GO:0006767,GO:0006771,GO:0006807,GO:0008150,GO:0008152,GO:0009058,GO:0009110,GO:0009231,GO:0009987,GO:0016787,GO:0016798,GO:0016799,GO:0016810,GO:0016814,GO:0017144,GO:0018130,GO:0019238,GO:0034641,GO:0042364,GO:0042726,GO:0042727,GO:0044237,GO:0044249,GO:0044271,GO:0044281,GO:0044283,GO:0046483,GO:0071704,GO:1901135,GO:1901360,GO:1901362,GO:…	3.5.4.25	ko:K01497	ko00740,ko00790,ko01100,ko01110,ko02024,map00740,map00790,map01100,map01110,map02024	M00125	R00425	RC00293,RC02504	ko00000,ko00001,ko00002,ko01000			iAPECO1_1312.APECO1_437,iPC815.YPO2222,iSbBS512_1146.SbBS512_E1505,iUTI89_1310.UTI89_C1548	Bacteria	1MWZR@1224,1RMFX@1236,2JCJ7@204037,COG0807@1,COG0807@2	NA|NA|NA	H	Catalyzes the conversion of GTP to 2,5-diamino-6- ribosylamino-4(3H)-pyrimidinone 5-phosphate (DARP), formate and pyrophosphate	Pfam, CDD, PANTHER, Gene3D, TIGRFAM, PANTHER, Hamap, SUPERFAMILY	PF00925, cd00641, PTHR21327, G3DSA:3.40.50.10990, TIGR00505, PTHR21327:SF30, MF_00179, SSF142695	GTP cyclohydrolase II, GTP_cyclohydro2, ribA: GTP cyclohydrolase II, GTP cyclohydrolase-2 [ribA].	IPR032677, IPR000926, IPR036144, IPR000926, IPR000926, IPR036144	GTP cyclohydrolase II, GTP cyclohydrolase II, RibA, RibA-like superfamily, GTP cyclohydrolase II, RibA, GTP cyclohydrolase II, RibA, RibA-like superfamily	GO:0003935, GO:0009231, GO:0003935, GO:0009231, GO:0003935, GO:0009231	KEGG: 00740+3.5.4.25|KEGG: 00790+3.5.4.25|MetaCyc: PWY-6168|MetaCyc: PWY-7539|MetaCyc: PWY-7991, KEGG: 00740+3.5.4.25|KEGG: 00790+3.5.4.25|MetaCyc: PWY-6168|MetaCyc: PWY-7539|MetaCyc: PWY-7991, KEGG: 00740+3.5.4.25|KEGG: 00790+3.5.4.25|MetaCyc: PWY-6168|MetaCyc: PWY-7539|MetaCyc: PWY-7991, KEGG: 00740+3.5.4.25|KEGG: 00790+3.5.4.25|MetaCyc: PWY-6168|MetaCyc: PWY-7539|MetaCyc: PWY-7991, KEGG: 00740…
NZ_CP050969.1_163_4	NA	NA	NA	NA	NA	NA	NA	NA	NA	NA	NA	NA	NA	NA	NA	NA	NA	NA	NA	NA	NA	MobiDBLite	mobidb-lite	consensus disorder prediction
NZ_CP050969.1_165_1	1192124.LIG30_4516	3.8e-09	66.6	Betaproteobacteria													Bacteria	1MZQA@1224,2VUFN@28216,COG0745@1,COG0745@2	NA|NA|NA	K	COG0745 Response regulators consisting of a CheY-like receiver domain and a winged-helix DNA-binding domain	Pfam, ProSiteProfiles, SUPERFAMILY, Gene3D	PF00486, PS51755, SSF46894, G3DSA:1.10.10.10	Transcriptional regulatory protein, C terminal, OmpR/PhoB-type DNA-binding domain profile.	IPR001867, IPR001867, IPR016032, IPR036388	OmpR/PhoB-type DNA-binding domain, OmpR/PhoB-type DNA-binding domain, Signal transduction response regulator, C-terminal effector, Winged helix-like DNA-binding domain superfamily	GO:0000160, GO:0003677, GO:0006355, GO:0000160, GO:0003677, GO:0006355, GO:0003677, GO:0006355
NZ_CP050969.1_169_1	911008.GLAD_03846	4.2e-61	241.9	Gammaproteobacteria	ybjX	GO:0005575,GO:0005622,GO:0005623,GO:0005737,GO:0005829,GO:0006950,GO:0006974,GO:0008150,GO:0009987,GO:0033554,GO:0044424,GO:0044444,GO:0044464,GO:0050896,GO:0051716		ko:K09824					ko00000				Bacteria	1NTXF@1224,1RPKK@1236,COG2990@1,COG2990@2	NA|NA|NA	S	protein conserved in bacteria	Pfam, PANTHER	PF04393, PTHR38785	Protein of unknown function (DUF535)	IPR007488, IPR007488	Protein of unknown function DUF535, Protein of unknown function DUF535
NZ_CP050969.1_169_10	558884.JRGM01000133_gene206	6.1e-52	209.9	Aeromonadales	grxD	GO:0003674,GO:0005488,GO:0005575,GO:0005622,GO:0005623,GO:0005737,GO:0005829,GO:0044424,GO:0044444,GO:0044464,GO:0048037,GO:0051536,GO:0051537,GO:0051540		ko:K07390					ko00000,ko03029,ko03110			iPC815.YPO2383,iYL1228.KPN_01992	Bacteria	1MZ4V@1224,1S640@1236,1Y4IQ@135624,COG0278@1,COG0278@2	NA|NA|NA	C	Belongs to the glutaredoxin family. Monothiol subfamily	SUPERFAMILY, PANTHER, ProSiteProfiles, CDD, TIGRFAM, Pfam, Gene3D, PANTHER, PIRSF	SSF52833, PTHR10293:SF16, PS51354, cd03028, TIGR00365, PF00462, G3DSA:3.40.30.10, PTHR10293, PIRSF005894	Glutaredoxin domain profile., GRX_PICOT_like, TIGR00365: monothiol glutaredoxin, Grx4 family, Glutaredoxin	IPR036249, IPR002109, IPR033658, IPR004480, IPR002109, IPR004480, IPR014434	Thioredoxin-like superfamily, Glutaredoxin, Glutaredoxin, PICOT-like, Monothiol glutaredoxin-related, Glutaredoxin, Monothiol glutaredoxin-related, Monothiol glutaredoxin	GO:0009055, GO:0015035, GO:0045454, GO:0009055, GO:0015035, GO:0045454, GO:0015036	Reactome: R-HSA-1362409
NZ_CP050969.1_169_11	511062.GU3_10950	4.2e-93	347.4	Aeromonadales	sodB	GO:0000302,GO:0000303,GO:0000305,GO:0003674,GO:0003824,GO:0004784,GO:0006801,GO:0006950,GO:0006979,GO:0008150,GO:0008152,GO:0009636,GO:0009987,GO:0010035,GO:0016209,GO:0016491,GO:0016721,GO:0019430,GO:0033554,GO:0034599,GO:0034614,GO:0042221,GO:0044237,GO:0050896,GO:0051716,GO:0055114,GO:0070887,GO:0071450,GO:0071451,GO:0072593,GO:0097237,GO:0098754,GO:0098869,GO:1901700,GO:1901701,GO:1990748	1.15.1.1,3.1.11.6	ko:K03601,ko:K04564	ko03430,ko04013,ko04068,ko04146,ko04211,ko04212,ko04213,ko05016,map03430,map04013,map04068,map04146,map04211,map04212,map04213,map05016				ko00000,ko00001,ko01000,ko03400				Bacteria	1MVW2@1224,1RP7X@1236,1Y3RW@135624,COG0605@1,COG0605@2	NA|NA|NA	P	Destroys radicals which are normally produced within the cells and which are toxic to biological systems	ProSitePatterns, PRINTS, PRINTS, PRINTS, PRINTS, PRINTS, Gene3D, PANTHER, SUPERFAMILY, SUPERFAMILY, Gene3D, Pfam, Pfam, PIRSF, PANTHER	PS00088, PR01703, PR01703, PR01703, PR01703, PR01703, G3DSA:1.10.287.990, PTHR42769, SSF54719, SSF46609, G3DSA:2.40.500.20, PF00081, PF02777, PIRSF000349, PTHR42769:SF3	Manganese and iron superoxide dismutases signature., Manganese superoxide dismutase signature, Manganese superoxide dismutase signature, Manganese superoxide dismutase signature, Manganese superoxide dismutase signature, Manganese superoxide dismutase signature, Iron/manganese superoxide dismutases, alpha-hairpin domain, Iron/manganese superoxide dismutases, C-terminal domain	IPR019833, IPR001189, IPR001189, IPR001189, IPR001189, IPR001189, IPR036324, IPR036314, IPR036324, IPR036314, IPR019831, IPR019832, IPR001189	Manganese/iron superoxide dismutase, binding site, Manganese/iron superoxide dismutase, Manganese/iron superoxide dismutase, Manganese/iron superoxide dismutase, Manganese/iron superoxide dismutase, Manganese/iron superoxide dismutase, Manganese/iron superoxide dismutase, N-terminal domain superfamily, Manganese/iron superoxide dismutase, C-terminal domain superfamily, Manganese/iron superoxide d…	GO:0004784, GO:0006801, GO:0046872, GO:0055114, GO:0004784, GO:0006801, GO:0046872, GO:0055114, GO:0004784, GO:0006801, GO:0046872, GO:0055114, GO:0004784, GO:0006801, GO:0046872, GO:0055114, GO:0004784, GO:0006801, GO:0046872, GO:0055114, GO:0004784, GO:0006801, GO:0046872, GO:0055114, GO:0004784, GO:0006801, GO:0046872, GO:0055114, GO:0004784, GO:0006801, GO:0046872, GO:0055114, GO:0004784, GO:…	MetaCyc: PWY-6854|Reactome: R-HSA-2151201|Reactome: R-HSA-3299685|Reactome: R-HSA-8862803|Reactome: R-HSA-8950505, MetaCyc: PWY-6854|Reactome: R-HSA-2151201|Reactome: R-HSA-3299685|Reactome: R-HSA-8862803|Reactome: R-HSA-8950505, MetaCyc: PWY-6854|Reactome: R-HSA-2151201|Reactome: R-HSA-3299685|Reactome: R-HSA-8862803|Reactome: R-HSA-8950505, MetaCyc: PWY-6854|Reactome: R-HSA-2151201|Reactome: R-…
NZ_CP050969.1_169_12	1045856.EcWSU1_00275	1.2e-92	346.3	Enterobacter	aphA	GO:0003674,GO:0003824,GO:0003993,GO:0004647,GO:0005488,GO:0005575,GO:0005623,GO:0006793,GO:0006796,GO:0008150,GO:0008152,GO:0009987,GO:0016311,GO:0016787,GO:0016788,GO:0016791,GO:0030288,GO:0030313,GO:0031975,GO:0042578,GO:0042597,GO:0044237,GO:0044464,GO:0048037	3.1.3.2	ko:K03788	ko00740,ko01100,map00740,map01100		R00548	RC00017	ko00000,ko00001,ko01000			iECIAI39_1322.ECIAI39_4476,iYL1228.KPN_04442	Bacteria	1PRRA@1224,1RP0N@1236,3X17R@547,COG3700@1,COG3700@2	NA|NA|NA	S	Belongs to the class B bacterial acid phosphatase family	SFLD, Pfam, PIRSF, SFLD, Gene3D, TIGRFAM, CDD, SUPERFAMILY	SFLDG01127, PF03767, PIRSF017818, SFLDS00003, G3DSA:3.40.50.1000, TIGR01672, cd07499, SSF56784	C1.3: Acid Phosphatase Like, HAD superfamily, subfamily IIIB (Acid phosphatase), Haloacid Dehalogenase, AphA: HAD phosphatase, family IIIB, HAD_CBAP	IPR010025, IPR005519, IPR010025, IPR023214, IPR010025, IPR010025, IPR036412	HAD-superfamily phosphatase, subfamily IIIB, AphA, Acid phosphatase, class B-like, HAD-superfamily phosphatase, subfamily IIIB, AphA, HAD superfamily, HAD-superfamily phosphatase, subfamily IIIB, AphA, HAD-superfamily phosphatase, subfamily IIIB, AphA, HAD-like superfamily	GO:0003993, GO:0030288, GO:0003993, GO:0030288, GO:0003993, GO:0030288, GO:0003993, GO:0030288	KEGG: 00730+3.1.3.2|KEGG: 00740+3.1.3.2|MetaCyc: PWY-6348, KEGG: 00730+3.1.3.2|KEGG: 00740+3.1.3.2|MetaCyc: PWY-6348, KEGG: 00730+3.1.3.2|KEGG: 00740+3.1.3.2|MetaCyc: PWY-6348, KEGG: 00730+3.1.3.2|KEGG: 00740+3.1.3.2|MetaCyc: PWY-6348
NZ_CP050969.1_169_13	319224.Sputcn32_1207	6.8e-11	76.3	Shewanellaceae													Bacteria	1MX15@1224,1S007@1236,2QAKK@267890,COG5184@1,COG5184@2	NA|NA|NA	DZ	regulator of chromosome condensation, RCC1	SUPERFAMILY, Gene3D	SSF50985, G3DSA:2.130.10.30		IPR009091, IPR009091	Regulator of chromosome condensation 1/beta-lactamase-inhibitor protein II, Regulator of chromosome condensation 1/beta-lactamase-inhibitor protein II
NZ_CP050969.1_169_14	667121.ET1_27_00170	3.5e-113	414.5	Gammaproteobacteria	pnuC			ko:K03811					ko00000,ko02000	4.B.1.1			Bacteria	1MXN4@1224,1RMZE@1236,COG3201@1,COG3201@2	NA|NA|NA	H	nicotinamide mononucleotide transporter	PANTHER, Pfam, TIGRFAM	PTHR36122, PF04973, TIGR01528	Nicotinamide mononucleotide transporter, NMN_trans_PnuC: nicotinamide mononucleotide transporter PnuC	IPR006419, IPR006419, IPR006419	Nicotinamide mononucleotide transporter PnuC, Nicotinamide mononucleotide transporter PnuC, Nicotinamide mononucleotide transporter PnuC	GO:0016020, GO:0034257, GO:0034258, GO:0016020, GO:0034257, GO:0034258, GO:0016020, GO:0034257, GO:0034258
NZ_CP050969.1_169_15	667121.ET1_27_00180	1.4e-101	375.9	Gammaproteobacteria	udp		2.4.2.1,2.4.2.3	ko:K00757,ko:K03784	ko00230,ko00240,ko00760,ko00983,ko01100,ko01110,map00230,map00240,map00760,map00983,map01100,map01110		R01561,R01863,R01876,R01969,R02147,R02294,R02295,R02297,R02484,R02557,R02748,R08229,R08368,R10244	RC00033,RC00063,RC00122	ko00000,ko00001,ko01000				Bacteria	1P0EC@1224,1RZGR@1236,COG2820@1,COG2820@2	NA|NA|NA	F	Uridine phosphorylase	Pfam, SUPERFAMILY, PANTHER, Gene3D, ProSitePatterns, PANTHER	PF01048, SSF53167, PTHR43691, G3DSA:3.40.50.1580, PS01232, PTHR43691:SF5	Phosphorylase superfamily, Purine and other phosphorylases family 1 signature.	IPR000845, IPR035994, IPR018016	Nucleoside phosphorylase domain, Nucleoside phosphorylase superfamily, Nucleoside phosphorylase, conserved site	GO:0003824, GO:0009116, GO:0003824, GO:0009116, GO:0016763	KEGG: 00230+2.4.2.1|KEGG: 00240+2.4.2.1|KEGG: 00760+2.4.2.1|MetaCyc: PWY-4202|MetaCyc: PWY-5532|MetaCyc: PWY-5695|MetaCyc: PWY-6608|MetaCyc: PWY-6609|MetaCyc: PWY-6611|MetaCyc: PWY-6620|MetaCyc: PWY-6627|MetaCyc: PWY-6644|MetaCyc: PWY-7179|MetaCyc: PWY-7179-1|Reactome: R-HSA-73614|Reactome: R-HSA-73621
NZ_CP050969.1_169_16	667121.ET1_27_00190	1.1e-82	313.2	Gammaproteobacteria	crp_2			ko:K10914	ko02020,ko02024,ko02025,ko02026,ko05111,map02020,map02024,map02025,map02026,map05111				ko00000,ko00001,ko03000				Bacteria	1RAW7@1224,1S36G@1236,COG0664@1,COG0664@2	NA|NA|NA	K	Cyclic nucleotide-binding domain	SUPERFAMILY, SUPERFAMILY, CDD, SMART, Pfam, Gene3D, Pfam, ProSiteProfiles, PANTHER, Gene3D, ProSiteProfiles, PANTHER	SSF51206, SSF46785, cd00038, SM00100, PF00027, G3DSA:2.60.120.10, PF13545, PS50042, PTHR24567, G3DSA:1.10.10.10, PS51063, PTHR24567:SF28	CAP_ED, Cyclic nucleotide-binding domain, Crp-like helix-turn-helix domain, cAMP/cGMP binding motif profile., Crp-type HTH domain profile.	IPR018490, IPR036390, IPR000595, IPR000595, IPR000595, IPR014710, IPR012318, IPR000595, IPR036388, IPR012318	Cyclic nucleotide-binding-like, Winged helix DNA-binding domain superfamily, Cyclic nucleotide-binding domain, Cyclic nucleotide-binding domain, Cyclic nucleotide-binding domain, RmlC-like jelly roll fold, Crp-type HTH domain, Cyclic nucleotide-binding domain, Winged helix-like DNA-binding domain superfamily, Crp-type HTH domain	GO:0003677, GO:0006355, GO:0003677, GO:0006355
NZ_CP050969.1_169_17	575788.VS_2052	4.4e-98	364.4	Vibrionales	miaE			ko:K06169					ko00000,ko01000,ko03016				Bacteria	1MVFE@1224,1RQ8Z@1236,1XUJD@135623,COG4445@1,COG4445@2	NA|NA|NA	FJ	COG4445 Hydroxylase for synthesis of 2-methylthio-cis-ribozeatin in tRNA	PIRSF, Gene3D, Gene3D, Pfam, SUPERFAMILY, PANTHER	PIRSF020736, G3DSA:1.20.1260.10, G3DSA:1.20.1260.10, PF06175, SSF47240, PTHR42637	tRNA-(MS[2]IO[6]A)-hydroxylase (MiaE)	IPR010386, IPR012347, IPR012347, IPR010386, IPR009078, IPR010386	tRNA-hydroxylase MiaE, Ferritin-like, Ferritin-like, tRNA-hydroxylase MiaE, Ferritin-like superfamily, tRNA-hydroxylase MiaE	GO:0006400, GO:0045301, GO:0006400, GO:0045301, GO:0006400, GO:0045301
NZ_CP050969.1_169_18	1391646.AVSU01000105_gene2214	2.4e-75	288.9	Clostridia	yoxB												Bacteria	1V3TG@1239,2488T@186801,28PVT@1,2ZCGB@2	NA|NA|NA			ProDom	PD315856	ORF119 CPE0798 YOXB	IPR020530	Uncharacterised protein family, YoxB
NZ_CP050969.1_169_19	945543.VIBR0546_17798	2e-91	342	Vibrionales	cat		2.3.1.28	ko:K00638,ko:K18234					br01600,ko00000,ko01000,ko01504				Bacteria	1MUCJ@1224,1RPPT@1236,1XU90@135623,COG0110@1,COG0110@2	NA|NA|NA	S	COG0110 Acetyltransferase (isoleucine patch superfamily)	ProSitePatterns, SUPERFAMILY, PANTHER, PANTHER, Gene3D, Pfam, CDD	PS00101, SSF51161, PTHR43300:SF5, PTHR43300, G3DSA:2.160.10.10, PF00132, cd03349	Hexapeptide-repeat containing-transferases signature.,Bacterial transferase hexapeptide (six repeats), LbH_XAT	IPR018357, IPR011004, IPR001451	Hexapeptide transferase, conserved site, Trimeric LpxA-like superfamily, Hexapeptide repeat	GO:0016740	Reactome: R-HSA-446205
NZ_CP050969.1_169_2	754436.JCM19237_4521	1.7e-72	279.6	Vibrionales	fruK	GO:0003674,GO:0003824,GO:0005575,GO:0005622,GO:0005623,GO:0005737,GO:0005829,GO:0005975,GO:0005996,GO:0006000,GO:0006001,GO:0006793,GO:0006796,GO:0008150,GO:0008152,GO:0008443,GO:0008662,GO:0009056,GO:0009987,GO:0016052,GO:0016301,GO:0016310,GO:0016740,GO:0016772,GO:0016773,GO:0019200,GO:0019318,GO:0019320,GO:0044237,GO:0044238,GO:0044262,GO:0044281,GO:0044282,GO:0044424,GO:0044444,GO:0044464,GO:…	2.7.1.11,2.7.1.56	ko:K00882,ko:K16370	ko00010,ko00030,ko00051,ko00052,ko00680,ko01100,ko01110,ko01120,ko01130,ko01200,ko01230,map00010,map00030,map00051,map00052,map00680,map01100,map01110,map01120,map01130,map01200,map01230	M00001,M00345	R00756,R02071,R03236,R03237,R03238,R03239,R04779	RC00002,RC00017	ko00000,ko00001,ko00002,ko01000			iAF1260.b2168,iAPECO1_1312.APECO1_4386,iB21_1397.B21_02056,iEC042_1314.EC042_2401,iEC55989_1330.EC55989_2421,iECABU_c1320.ECABU_c24990,iECBD_1354.ECBD_1490,iECB_1328.ECB_02097,iECDH10B_1368.ECDH10B_2325,iECDH1ME8569_1439.ECDH1ME8569_2104,iECD_1391.ECD_02097,iECED1_1282.ECED1_2616,iECH74115_1262.ECH74115_3304,iECIAI1_1343.ECIAI1_2248,iECIAI39_1322.ECIAI39_2308,iECNA114_1301.ECNA114_2259,iECO103_13…	Bacteria	1MVNW@1224,1RP6K@1236,1XSVH@135623,COG1105@1,COG1105@2	NA|NA|NA	H	belongs to the carbohydrate kinase PfkB family	SUPERFAMILY, ProSitePatterns, PANTHER, Pfam, PANTHER, Gene3D, TIGRFAM, CDD, PIRSF, TIGRFAM	SSF53613, PS00583, PTHR10584, PF00294, PTHR10584:SF170, G3DSA:3.40.1190.20, TIGR03828, cd01164, PIRSF000535, TIGR03168	pfkB family of carbohydrate kinases signature 1., pfkB family carbohydrate kinase, pfkB: 1-phosphofructokinase, FruK_PfkB_like, 1-PFK: hexose kinase, 1-phosphofructokinase family	IPR029056, IPR002173, IPR011611, IPR029056, IPR022463, IPR017583, IPR017583, IPR017583	Ribokinase-like, Carbohydrate/puine kinase, PfkB, conserved site, Carbohydrate kinase PfkB, Ribokinase-like, Fructose 1-phosphate kinase, Tagatose/fructose phosphokinase, Tagatose/fructose phosphokinase, Tagatose/fructose phosphokinase	GO:0016773,GO:0008662, GO:0005975, GO:0016773, GO:0005975, GO:0016773, GO:0005975, GO:0016773	KEGG: 00051+2.7.1.56
NZ_CP050969.1_169_20	765913.ThidrDRAFT_0631	7e-140	503.8	Chromatiales	yqhD			ko:K00100,ko:K08325,ko:K19955	ko00640,ko00650,ko01120,map00640,map00650,map01120		R02528,R03544,R03545	RC00087,RC00739	ko00000,ko00001,ko01000				Bacteria	1QUBJ@1224,1RP7C@1236,1WX8P@135613,COG1979@1,COG1979@2	NA|NA|NA	C	Iron-containing alcohol dehydrogenase	PANTHER, CDD, Gene3D, Gene3D, SUPERFAMILY, ProSitePatterns, Pfam	PTHR43633, cd08187, G3DSA:1.20.1090.10, G3DSA:3.40.50.1970, SSF56796, PS00060, PF00465	BDH, Iron-containing alcohol dehydrogenases signature 2., Iron-containing alcohol dehydrogenase	IPR018211, IPR001670	Alcohol dehydrogenase, iron-type, conserved site, Alcohol dehydrogenase, iron-type/glycerol dehydrogenase GldA	GO:0016491, GO:0046872, GO:0055114, GO:0016491, GO:0046872, GO:0055114	Reactome: R-HSA-880009
NZ_CP050969.1_169_21	298386.PBPRA1894	1.3e-48	199.5	Vibrionales	SO4011												Bacteria	1RBZ8@1224,1S3VD@1236,1Y29R@135623,2BYAF@1,2ZWH8@2	NA|NA|NA	S	Protein of unknown function (DUF3581)	Pfam	PF12119	Protein of unknown function (DUF3581)	IPR021974	Protein of unknown function DUF3581
NZ_CP050969.1_169_22	1484157.PSNIH2_12655	5e-38	164.1	Pantoea	tesC	GO:0003674,GO:0003824,GO:0006082,GO:0006629,GO:0006631,GO:0006635,GO:0008150,GO:0008152,GO:0009056,GO:0009062,GO:0009987,GO:0016042,GO:0016054,GO:0016289,GO:0016787,GO:0016788,GO:0016790,GO:0019395,GO:0019752,GO:0030258,GO:0032787,GO:0034440,GO:0043436,GO:0044237,GO:0044238,GO:0044242,GO:0044248,GO:0044255,GO:0044281,GO:0044282,GO:0046395,GO:0047617,GO:0055114,GO:0071704,GO:0072329,GO:1901575		ko:K07107,ko:K12500					ko00000,ko01000,ko01004				Bacteria	1REIH@1224,1S40Z@1236,3W0TT@53335,COG0824@1,COG0824@2	NA|NA|NA	S	thioesterase	Gene3D, CDD, PANTHER, TIGRFAM, Pfam, PANTHER, PIRSF, SUPERFAMILY	G3DSA:3.10.129.10, cd00586, PTHR31793:SF22, TIGR00051, PF13279, PTHR31793, PIRSF003230, SSF54637	4HBT, TIGR00051: acyl-CoA thioester hydrolase, YbgC/YbaW family, Thioesterase-like superfamily	IPR006684, IPR006684, IPR029069	Acyl-CoA thioester hydrolase YbgC/YbaW family, Acyl-CoA thioester hydrolase YbgC/YbaW family, HotDog domain superfamily	GO:0016787, GO:0016787
NZ_CP050969.1_169_23	298386.PBPRA1830	1.8e-17	95.9	Vibrionales													Bacteria	1NG9I@1224,1TGNN@1236,1XXYY@135623,2DRYR@1,33DQT@2	NA|NA|NA			NA	NA	NA	NA	NA	NA	NA
NZ_CP050969.1_169_24	225849.swp_2572	1.1e-240	839	Shewanellaceae	ccoN	GO:0003674,GO:0003824,GO:0004129,GO:0005215,GO:0005488,GO:0005506,GO:0005507,GO:0005575,GO:0005623,GO:0005886,GO:0005887,GO:0006091,GO:0006119,GO:0006139,GO:0006163,GO:0006725,GO:0006753,GO:0006793,GO:0006796,GO:0006807,GO:0006810,GO:0006811,GO:0006812,GO:0008144,GO:0008150,GO:0008152,GO:0008324,GO:0009055,GO:0009060,GO:0009117,GO:0009123,GO:0009126,GO:0009141,GO:0009144,GO:0009150,GO:0009161,GO:…	1.9.3.1	ko:K00404,ko:K15862	ko00190,ko01100,ko02020,map00190,map01100,map02020	M00156			ko00000,ko00001,ko00002,ko01000	3.D.4.3		iIT341.HP0144	Bacteria	1MU18@1224,1RM7I@1236,2Q905@267890,COG3278@1,COG3278@2	NA|NA|NA	C	Belongs to the heme-copper respiratory oxidase family	TIGRFAM, ProSiteProfiles, SUPERFAMILY, Gene3D, Pfam, ProSitePatterns, CDD, PANTHER, PANTHER	TIGR00780, PS50855, SSF81442, G3DSA:1.20.210.10, PF00115, PS00077, cd01661, PTHR10422, PTHR10422:SF29	ccoN: cytochrome c oxidase, cbb3-type, subunit I, Cytochrome oxidase subunit I profile., Cytochrome C and Quinol oxidase polypeptide I, Heme-copper oxidase catalytic subunit, copper B binding region signature., cbb3_Oxidase_I	IPR004677, IPR023616, IPR036927, IPR036927, IPR000883, IPR023615, IPR004677, IPR000883, IPR004677	Cytochrome c oxidase cbb3-type, subunit I, Cytochrome c oxidase-like, subunit I domain, Cytochrome c oxidase-like, subunit I superfamily, Cytochrome c oxidase-like, subunit I superfamily, Cytochrome c oxidase subunit I, Cytochrome c oxidase, subunit I, copper-binding site, Cytochrome c oxidase cbb3-type, subunit I, Cytochrome c oxidase subunit I, Cytochrome c oxidase cbb3-type, subunit I	GO:0004129, GO:0045278, GO:0055114, GO:0004129, GO:0055114, GO:0055114, GO:0055114, GO:0004129, GO:0009060, GO:0016021, GO:0020037, GO:0055114, GO:0004129, GO:0055114, GO:0004129, GO:0045278, GO:0055114, GO:0004129, GO:0009060, GO:0016021, GO:0020037, GO:0055114, GO:0004129, GO:0045278, GO:0055114	KEGG: 00190+1.9.3.1|MetaCyc: PWY-3781|MetaCyc: PWY-4521|MetaCyc: PWY-6692|MetaCyc: PWY-7279, KEGG: 00190+1.9.3.1|MetaCyc: PWY-3781|MetaCyc: PWY-4521|MetaCyc: PWY-6692|MetaCyc: PWY-7279|Reactome: R-HSA-5628897|Reactome: R-HSA-611105, KEGG: 00190+1.9.3.1|MetaCyc: PWY-3781|MetaCyc: PWY-4521|MetaCyc: PWY-6692|MetaCyc: PWY-7279|Reactome: R-HSA-5628897|Reactome: R-HSA-611105, KEGG: 00190+1.9.3.1|MetaCy…
NZ_CP050969.1_169_25	754436.JCM19237_6490	3.1e-94	351.3	Vibrionales	ccoO		1.9.3.1	ko:K00405,ko:K15862	ko00190,ko01100,ko02020,map00190,map01100,map02020	M00156			ko00000,ko00001,ko00002,ko01000	3.D.4.3		iIT341.HP0145	Bacteria	1MXEY@1224,1RPU6@1236,1XUDZ@135623,COG2993@1,COG2993@2	NA|NA|NA	C	Cbb3-type cytochrome oxidase, cytochrome c subunit	Gene3D, Pfam, SUPERFAMILY, TIGRFAM, ProSiteProfiles	G3DSA:1.10.760.10, PF02433, SSF46626, TIGR00781, PS51007	Cytochrome C oxidase, mono-heme subunit/FixO, ccoO: cytochrome c oxidase, cbb3-type, subunit II, Cytochrome c family profile.	IPR036909, IPR003468, IPR036909, IPR003468, IPR009056	Cytochrome c-like domain superfamily, Cytochrome c oxidase, monohaem subunit/FixO, Cytochrome c-like domain superfamily, Cytochrome c oxidase, monohaem subunit/FixO, Cytochrome c-like domain	GO:0009055, GO:0020037, GO:0009055, GO:0020037, GO:0009055, GO:0020037	Reactome: R-HSA-611105, Reactome: R-HSA-611105, Reactome: R-HSA-111457|Reactome: R-HSA-111458|Reactome: R-HSA-111459|Reactome: R-HSA-2151201|Reactome: R-HSA-3299685|Reactome: R-HSA-5628897|Reactome: R-HSA-611105
NZ_CP050969.1_169_26	29495.EA26_07880	1.8e-13	81.3	Vibrionales	ccoQ			ko:K00407	ko00190,ko01100,ko02020,map00190,map01100,map02020	M00156			ko00000,ko00001,ko00002	3.D.4.3			Bacteria	1NGAN@1224,1SGJ2@1236,1XYUT@135623,COG4736@1,COG4736@2	NA|NA|NA	O	COG4736 Cbb3-type cytochrome oxidase, subunit 3	CDD, Pfam	cd01324, PF05545	cbb3_Oxidase_CcoQ, Cbb3-type cytochrome oxidase component FixQ	IPR008621, IPR008621	Cbb3-type cytochrome oxidase component, Cbb3-type cytochrome oxidase component
NZ_CP050969.1_169_27	1187848.AJYQ01000076_gene1677	3.6e-124	451.4	Vibrionales	ccoP			ko:K00406	ko00190,ko01100,ko02020,map00190,map01100,map02020	M00156			ko00000,ko00001,ko00002	3.D.4.3		iJN746.PP_4253	Bacteria	1MUCW@1224,1RPYJ@1236,1XSF6@135623,COG2010@1,COG2010@2	NA|NA|NA	C	C-type cytochrome. Part of the cbb3-type cytochrome c oxidase complex	PRINTS, PRINTS, PANTHER, ProSiteProfiles, Pfam, Pfam, Gene3D, PANTHER, Gene3D, PANTHER, TIGRFAM, ProSiteProfiles, Pfam, SUPERFAMILY, SUPERFAMILY, PANTHER, PIRSF, Gene3D	PR00605, PR00605, PTHR33751:SF1, PS51007, PF13442, PF13442, G3DSA:1.10.760.10, PTHR33751, G3DSA:1.20.58.1490, PTHR33751, TIGR00782, PS51007, PF14715, SSF46626, SSF46626, PTHR33751:SF1, PIRSF000006, G3DSA:1.10.760.10	Class IC cytochrome C signature, Class IC cytochrome C signature, Cytochrome c family profile., Cytochrome C oxidase, cbb3-type, subunit III, Cytochrome C oxidase, cbb3-type, subunit III,ccoP: cytochrome c oxidase, cbb3-type, subunit III, Cytochrome c family profile., N-terminal domain of cytochrome oxidase-cbb3, FixP,nan]	IPR008168, IPR008168, IPR009056, IPR009056, IPR009056, IPR036909, IPR038414, IPR004678, IPR009056, IPR032858, IPR036909, IPR036909, IPR004678, IPR036909	Cytochrome c, class IC, Cytochrome c, class IC, Cytochrome c-like domain, Cytochrome c-like domain, Cytochrome c-like domain, Cytochrome c-like domain superfamily, Cbb3-type cytochrome c oxidase subunit CcoP, N-terminal domain superfamily, Cytochrome c oxidase cbb3-type, subunit III, Cytochrome c-like domain, Cbb3-type cytochrome c oxidase subunit CcoP, N-terminal, Cytochrome c-like domain superf…	GO:0005506, GO:0009055, GO:0005506, GO:0009055, GO:0009055, GO:0020037, GO:0009055, GO:0020037, GO:0009055, GO:0020037, GO:0009055, GO:0020037,GO:0009055, GO:0020037, GO:0009055, GO:0020037, GO:0009055, GO:0020037, GO:0009055, GO:0020037	Reactome: R-HSA-111457|Reactome: R-HSA-111458|Reactome: R-HSA-111459|Reactome: R-HSA-2151201|Reactome: R-HSA-3299685|Reactome: R-HSA-5628897|Reactome: R-HSA-611105, Reactome: R-HSA-111457|Reactome: R-HSA-111458|Reactome: R-HSA-111459|Reactome: R-HSA-2151201|Reactome: R-HSA-3299685|Reactome: R-HSA-5628897|Reactome: R-HSA-611105, Reactome: R-HSA-111457|Reactome: R-HSA-111458|Reactome: R-HSA-111459|…
NZ_CP050969.1_169_28	94122.Shewana3_2111	1.7e-34	152.5	Shewanellaceae	ccoH			ko:K09926					ko00000				Bacteria	1N75J@1224,1SC87@1236,2QBT2@267890,COG3198@1,COG3198@2	NA|NA|NA	S	FixH	Pfam	PF05751	FixH	IPR008620	Nitrogen fixation protein FixH
NZ_CP050969.1_169_29	1248232.BANQ01000056_gene2964	7.6e-245	853.6	Vibrionales	fixI	GO:0003674,GO:0003824,GO:0005215,GO:0005388,GO:0005575,GO:0005622,GO:0005623,GO:0005886,GO:0005887,GO:0006810,GO:0006811,GO:0006812,GO:0006816,GO:0008150,GO:0008324,GO:0015075,GO:0015085,GO:0015318,GO:0015399,GO:0015405,GO:0015662,GO:0016020,GO:0016021,GO:0016462,GO:0016787,GO:0016817,GO:0016818,GO:0016887,GO:0017111,GO:0019829,GO:0022804,GO:0022853,GO:0022857,GO:0022890,GO:0030001,GO:0031224,GO:…	3.6.3.4,3.6.3.54	ko:K01533,ko:K17686	ko01524,ko04016,map01524,map04016		R00086	RC00002	ko00000,ko00001,ko01000	3.A.3.5			Bacteria	1MU08@1224,1RN2C@1236,1XSV0@135623,COG2217@1,COG2217@2	NA|NA|NA	P	cation transport ATPase	PANTHER, TIGRFAM, SUPERFAMILY, Pfam, Gene3D, Pfam, TIGRFAM, Pfam, SFLD, ProSiteProfiles, PANTHER, Gene3D, SFLD, Gene3D, Pfam, SUPERFAMILY, CDD, ProSitePatterns, SUPERFAMILY, PRINTS, PRINTS, PRINTS, PRINTS, PRINTS, PRINTS, ProSitePatterns, TIGRFAM, TIGRFAM, SUPERFAMILY, Gene3D, CDD	PTHR43520:SF5, TIGR01525, SSF55008, PF12156, G3DSA:3.40.50.1000, PF00403, TIGR01511, PF00702, SFLDF00027, PS50846, PTHR43520, G3DSA:2.70.150.20, SFLDG00002, G3DSA:3.30.70.100, PF00122, SSF81665, cd00371, PS01229, SSF56784, PR00119, PR00119, PR00119, PR00119, PR00119, PR00119, PS00154, TIGR01494, TIGR01494, SSF81653, G3DSA:3.40.1110.10, cd02079	ATPase-IB_hvy: heavy metal translocating P-type ATPase, Putative metal-binding domain of cation transport ATPase, Heavy-metal-associated domain, ATPase-IB1_Cu: copper-translocating P-type ATPase, haloacid dehalogenase-like hydrolase, p-type atpase, Heavy-metal-associated domain profile., C1.7: P-type atpase like, E1-E2 ATPase, HMA, Hypothetical cof family signature 2., P-type cation-transporting …	IPR027256, IPR036163, IPR021993, IPR023214, IPR006121, IPR006121, IPR023298, IPR006121, IPR036412, IPR018303, IPR001757, IPR001757, IPR008250, IPR023299	P-type ATPase, subfamily IB, Heavy metal-associated domain superfamily, Putative metal-binding domain of cation transport ATPase, HAD superfamily, Heavy metal-associated domain, HMA, Heavy metal-associated domain, HMA, P-type ATPase, transmembrane domain superfamily, Heavy metal-associated domain, HMA, HAD-like superfamily, P-type ATPase, phosphorylation site, P-type ATPase, P-type ATPase, P-type…	GO:0006812, GO:0016021, GO:0019829, GO:0030001, GO:0046872, GO:0030001, GO:0046872, GO:0030001, GO:0046872, GO:0030001, GO:0046872,GO:0016021, GO:0016021, GO:0000166	Reactome: R-HSA-936837, Reactome: R-HSA-936837,Reactome: R-HSA-936837, Reactome: R-HSA-936837, Reactome: R-HSA-936837, Reactome: R-HSA-936837, Reactome: R-HSA-936837
NZ_CP050969.1_169_3	349965.yinte0001_13540	6.8e-189	667.2	Yersinia	ybjD	GO:0000731,GO:0006139,GO:0006259,GO:0006281,GO:0006302,GO:0006725,GO:0006807,GO:0006950,GO:0006974,GO:0008150,GO:0008152,GO:0009058,GO:0009059,GO:0009987,GO:0018130,GO:0019438,GO:0033554,GO:0034641,GO:0034645,GO:0034654,GO:0043170,GO:0044237,GO:0044238,GO:0044249,GO:0044260,GO:0044271,GO:0046483,GO:0050896,GO:0051716,GO:0071704,GO:0071897,GO:0090304,GO:1901360,GO:1901362,GO:1901576		ko:K07459					ko00000				Bacteria	1N2CB@1224,1RQN2@1236,41F8G@629,COG3593@1,COG3593@2	NA|NA|NA	L	ATP-dependent endonuclease of the OLD family	ProSiteProfiles, SUPERFAMILY, PANTHER, Gene3D, Pfam, PANTHER, CDD	PS50880, SSF52540, PTHR32182:SF19, G3DSA:3.40.50.300, PF11398, PTHR32182, cd01026	Toprim domain profile., Protein of unknown function (DUF2813), TOPRIM_OLD	IPR006171, IPR027417, IPR022602, IPR034139	TOPRIM domain, P-loop containing nucleoside triphosphate hydrolase, Protein of unknown function DUF2813, OLD protein-like, TOPRIM domain
NZ_CP050969.1_169_30	398579.Spea_2220	4.5e-11	73.6	Shewanellaceae	ccoS												Bacteria	1NG90@1224,1SGQG@1236,2QCUI@267890,COG3197@1,COG3197@2	NA|NA|NA	P	TIGRFAM cytochrome oxidase maturation protein, cbb3-type	Pfam, PANTHER, TIGRFAM, MobiDBLite, MobiDBLite	PF03597, PTHR41532, TIGR00847, mobidb-lite, mobidb-lite	Cytochrome oxidase maturation protein cbb3-type, ccoS: cytochrome oxidase maturation protein, cbb3-type, consensus disorder prediction, consensus disorder prediction	IPR004714, IPR004714, IPR004714	Cytochrome oxidase maturation protein cbb3-type, Cytochrome oxidase maturation protein cbb3-type, Cytochrome oxidase maturation protein cbb3-type
NZ_CP050969.1_169_31	314292.VAS14_02793	6.7e-66	257.3	Vibrionales	braZ			ko:K09792					ko00000				Bacteria	1RIGJ@1224,1S5V1@1236,1XTG2@135623,COG2836@1,COG2836@2	NA|NA|NA	S	Cytochrome C biogenesis protein transmembrane region	Pfam, PANTHER	PF13386, PTHR42208	Cytochrome C biogenesis protein transmembrane region	IPR039447	Urease accessory protein UreH-like, transmembrane domain
NZ_CP050969.1_169_32	1453496.AT03_10965	5.9e-124	450.3	Gammaproteobacteria	fnr	GO:0000302,GO:0000976,GO:0001067,GO:0001130,GO:0001216,GO:0003674,GO:0003676,GO:0003677,GO:0003690,GO:0003700,GO:0005488,GO:0005575,GO:0005622,GO:0005623,GO:0005737,GO:0005829,GO:0006091,GO:0006355,GO:0006950,GO:0006979,GO:0008150,GO:0008152,GO:0009061,GO:0009889,GO:0009891,GO:0009893,GO:0009987,GO:0010035,GO:0010468,GO:0010556,GO:0010557,GO:0010604,GO:0010628,GO:0015980,GO:0019219,GO:0019222,GO:…		ko:K01420					ko00000,ko03000				Bacteria	1MVGE@1224,1RPTB@1236,COG0664@1,COG0664@2	NA|NA|NA	K	COG0664 cAMP-binding proteins - catabolite gene activator and regulatory subunit of cAMP-dependent protein kinases	PANTHER, ProSitePatterns, SUPERFAMILY, PANTHER, ProSiteProfiles, Pfam, SUPERFAMILY, SMART, Gene3D, PRINTS, PRINTS, Gene3D, SMART, ProSiteProfiles, CDD, CDD, Pfam	PTHR24567, PS00042, SSF46785, PTHR24567:SF28, PS51063, PF13545, SSF51206, SM00419, G3DSA:2.60.120.10, PR00034, PR00034, G3DSA:1.10.10.10, SM00100, PS50042, cd00038, cd00092, PF00027	Crp-type HTH domain signature., Crp-type HTH domain profile., Crp-like helix-turn-helix domain, CRP bacterial regulatory protein HTH signature, CRP bacterial regulatory protein HTH signature, cAMP/cGMP binding motif profile., CAP_ED, HTH_CRP, Cyclic nucleotide-binding domain	IPR018335, IPR036390, IPR012318, IPR012318, IPR018490, IPR012318, IPR014710, IPR012318, IPR012318, IPR036388, IPR000595, IPR000595, IPR000595, IPR000595	Transcription regulator HTH, Crp-type, conserved site, Winged helix DNA-binding domain superfamily, Crp-type HTH domain, Crp-type HTH domain, Cyclic nucleotide-binding-like, Crp-type HTH domain, RmlC-like jelly roll fold, Crp-type HTH domain, Crp-type HTH domain, Winged helix-like DNA-binding domain superfamily, Cyclic nucleotide-binding domain, Cyclic nucleotide-binding domain, Cyclic nucleotide…	GO:0003700, GO:0005622, GO:0006355, GO:0003677, GO:0006355, GO:0003677, GO:0006355, GO:0003677, GO:0006355, GO:0003677, GO:0006355, GO:0003677, GO:0006355
NZ_CP050969.1_169_33	1453496.AT03_10960	3.4e-116	424.9	Gammaproteobacteria	uspE	GO:0000302,GO:0001539,GO:0006928,GO:0006950,GO:0006979,GO:0008150,GO:0009314,GO:0009411,GO:0009416,GO:0009628,GO:0009636,GO:0009987,GO:0010035,GO:0033554,GO:0034599,GO:0034614,GO:0034644,GO:0035690,GO:0040011,GO:0042221,GO:0042493,GO:0042542,GO:0042710,GO:0044010,GO:0044764,GO:0046677,GO:0048870,GO:0050896,GO:0051179,GO:0051674,GO:0051704,GO:0051716,GO:0070301,GO:0070887,GO:0071214,GO:0071236,GO:…		ko:K14055					ko00000				Bacteria	1MVZS@1224,1RPAE@1236,COG0589@1,COG0589@2	NA|NA|NA	T	universal stress protein	PANTHER, CDD, PRINTS, PRINTS, PRINTS, SUPERFAMILY, CDD, SUPERFAMILY, PANTHER, Gene3D, Pfam, Pfam	PTHR31964:SF41, cd00293, PR01438, PR01438, PR01438, SSF52402, cd00293, SSF52402, PTHR31964, G3DSA:3.40.50.12370, PF00582, PF00582	USP_Like, Universal stress protein signature, Universal stress protein signature, Universal stress protein signature, USP_Like, Universal stress protein family, Universal stress protein family	IPR006015, IPR006015, IPR006015, IPR006016, IPR006016	Universal stress protein A, Universal stress protein A, Universal stress protein A, UspA, UspA
NZ_CP050969.1_169_34	298386.PBPRB0825	6.6e-93	347.4	Vibrionales													Bacteria	1MXVG@1224,1RSB7@1236,1XVFW@135623,COG3965@1,COG3965@2	NA|NA|NA	P	Cation efflux family	PANTHER, SUPERFAMILY, Pfam, TIGRFAM, Gene3D	PTHR43840, SSF161111, PF01545, TIGR01297, G3DSA:1.20.1510.10	Cation efflux family, CDF: cation diffusion facilitator family transporter	IPR027469, IPR002524, IPR002524, IPR027469	Cation efflux transmembrane domain superfamily, Cation efflux protein, Cation efflux protein, Cation efflux transmembrane domain superfamily	GO:0006812, GO:0008324, GO:0016021, GO:0055085, GO:0006812, GO:0008324, GO:0016021, GO:0055085
NZ_CP050969.1_169_36	402881.Plav_0525	2e-57	229.2	Alphaproteobacteria				ko:K09797					ko00000				Bacteria	1QU0K@1224,2U5D2@28211,COG2859@1,COG2859@2	NA|NA|NA	S	Protein conserved in bacteria	PIRSF, Gene3D, Pfam, Gene3D	PIRSF029033, G3DSA:3.30.110.170, PF04402, G3DSA:3.30.70.2970	Protein of unknown function (DUF541)	IPR016907, IPR007497	Uncharacterised conserved protein UCP029033, periplasmic protein, Protein of unknown function DUF541
NZ_CP050969.1_169_37	561230.PC1_2316	2.5e-148	531.6	Pectobacterium	ttcA	GO:0003674,GO:0003824,GO:0005488,GO:0005575,GO:0005622,GO:0005623,GO:0005737,GO:0005829,GO:0006139,GO:0006396,GO:0006399,GO:0006400,GO:0006725,GO:0006807,GO:0008033,GO:0008150,GO:0008152,GO:0009451,GO:0009987,GO:0010467,GO:0016070,GO:0016740,GO:0016782,GO:0016783,GO:0034227,GO:0034470,GO:0034641,GO:0034660,GO:0043170,GO:0043412,GO:0044237,GO:0044238,GO:0044424,GO:0044444,GO:0044464,GO:0046483,GO:…	6.3.4.19	ko:K04075,ko:K14058			R09597	RC02633,RC02634	ko00000,ko01000,ko03016				Bacteria	1MRJA@122277,1MW5Q@1224,1RN2H@1236,COG0037@1,COG0037@2	NA|NA|NA	J	Catalyzes the ATP-dependent 2-thiolation of cytidine in position 32 of tRNA, to form 2-thiocytidine (s(2)C32). The sulfur atoms are provided by the cysteine cysteine desulfurase (IscS) system	Hamap, PIRSF, PANTHER, PANTHER, Pfam, Gene3D, SUPERFAMILY, CDD	MF_01850, PIRSF004976, PTHR43686:SF2, PTHR43686, PF01171, G3DSA:3.40.50.620, SSF52402, cd01993	tRNA-cytidine(32) 2-sulfurtransferase [ttcA]., PP-loop family, Alpha_ANH_like_II	IPR012089, IPR035107, IPR011063, IPR014729	tRNA-cytidine(32) 2-sulfurtransferase, tRNA thiolation protein, TtcA/Ctu1 type, tRNA(Ile)-lysidine/2-thiocytidine synthase, N-terminal, Rossmann-like alpha/beta/alpha sandwich fold	GO:0008033, GO:0008033	Reactome: R-HSA-6782315, Reactome: R-HSA-6782315
NZ_CP050969.1_169_38	1268237.G114_00725	5e-83	313.9	Aeromonadales	efp	GO:0003674,GO:0003676,GO:0003723,GO:0003746,GO:0005488,GO:0005575,GO:0005622,GO:0005623,GO:0005737,GO:0006412,GO:0006414,GO:0006518,GO:0006807,GO:0008135,GO:0008150,GO:0008152,GO:0009058,GO:0009059,GO:0009987,GO:0010467,GO:0019538,GO:0034641,GO:0034645,GO:0043043,GO:0043170,GO:0043603,GO:0043604,GO:0044237,GO:0044238,GO:0044249,GO:0044260,GO:0044267,GO:0044271,GO:0044424,GO:0044464,GO:0071704,GO:…		ko:K02356					ko00000,ko03012				Bacteria	1MW2J@1224,1RPW7@1236,1Y44K@135624,COG0231@1,COG0231@2	NA|NA|NA	J	Involved in peptide bond synthesis. Stimulates efficient translation and peptide-bond synthesis on native or reconstituted 70S ribosomes in vitro. Probably functions indirectly by altering the affinity of the ribosome for aminoacyl-tRNA, thus increasing their reactivity as acceptors for peptidyl transferase	Pfam, PANTHER, SMART, Gene3D, CDD, Hamap, Pfam, PIRSF, SUPERFAMILY, SUPERFAMILY, SMART, PANTHER, Gene3D, Pfam, Gene3D, TIGRFAM, SUPERFAMILY	PF01132, PTHR30053:SF1, SM00841, G3DSA:2.30.30.30, cd04470, MF_00141, PF08207, PIRSF005901, SSF50249, SSF50104, SM01185, PTHR30053, G3DSA:2.40.50.140, PF09285, G3DSA:2.40.50.140, TIGR00038, SSF50249	Elongation factor P (EF-P) OB domain, S1_EF-P_repeat_1, Elongation factor P [efp]., Elongation factor P (EF-P) KOW-like domain, Elongation factor P, C-terminal, efp: translation elongation factor P	IPR001059, IPR015365, IPR014722, IPR001059, IPR011768, IPR013185, IPR020599, IPR012340, IPR008991, IPR001059, IPR020599, IPR015365, IPR011768, IPR012340	Translation elongation factor P/YeiP, central, Elongation factor P, C-terminal, Ribosomal protein L2, domain 2, Translation elongation factor P/YeiP, central, Translation elongation factor P, Translation elongation factor, KOW-like, Translation elongation factor P/YeiP, Nucleic acid-binding, OB-fold, Translation protein SH3-like domain superfamily, Translation elongation factor P/YeiP, central, T…	GO:0003746, GO:0006414, GO:0005737, GO:0043043, GO:0003746, GO:0006414, GO:0003746, GO:0005737, GO:0006414,GO:0003746, GO:0006414, GO:0005737, GO:0043043, GO:0003746, GO:0005737, GO:0006414
NZ_CP050969.1_169_39	380703.AHA_3226	9.4e-105	387.1	Aeromonadales													Bacteria	1MYVF@1224,1RY43@1236,1Y4CJ@135624,COG4394@1,COG4394@2	NA|NA|NA	S	Uncharacterized protein conserved in bacteria (DUF2331)	Pfam, TIGRFAM, PIRSF	PF10093, TIGR03837, PIRSF015557	Uncharacterized protein conserved in bacteria (DUF2331), efp_adjacent_2: conserved hypothetical protein, PP_1857 family	IPR016633, IPR016633, IPR016633	Uncharacterised conserved protein UCP015557, Uncharacterised conserved protein UCP015557, Uncharacterised conserved protein UCP015557
NZ_CP050969.1_169_4	667121.ET1_21_00330	3.4e-94	351.7	Gammaproteobacteria	ybjE	GO:0003333,GO:0003674,GO:0005215,GO:0005342,GO:0005575,GO:0005623,GO:0005886,GO:0005887,GO:0006810,GO:0006811,GO:0006812,GO:0006820,GO:0006855,GO:0006865,GO:0008150,GO:0008324,GO:0008509,GO:0008514,GO:0015075,GO:0015171,GO:0015174,GO:0015179,GO:0015189,GO:0015238,GO:0015318,GO:0015562,GO:0015661,GO:0015711,GO:0015802,GO:0015807,GO:0015849,GO:0015893,GO:0016020,GO:0016021,GO:0022857,GO:0031224,GO:…											Bacteria	1MYMF@1224,1RP7N@1236,COG2431@1,COG2431@2	NA|NA|NA	S	membrane	PANTHER, Pfam, ProDom	PTHR35804, PF03956, PD022789	Lysine exporter LysO, MEMBRANE SURFACE PRECURSOR SIGNAL PROTEIN YBJE TRANSMEMBRANE INNER PREDICTED STY0934	IPR005642, IPR005642, IPR005642	Lysine exporter LysO, Lysine exporter LysO, Lysine exporter LysO
NZ_CP050969.1_169_40	1117318.PRUB_00700	1.2e-254	885.6	Pseudoalteromonadaceae	ybiT	GO:0006950,GO:0008150,GO:0009266,GO:0009409,GO:0009628,GO:0050896		ko:K06158					ko00000,ko03012				Bacteria	1MU37@1224,1RPN9@1236,2Q06G@267888,COG0488@1,COG0488@2	NA|NA|NA	S	COG0488 ATPase components of ABC transporters with duplicated ATPase domains	Pfam, PANTHER, SUPERFAMILY, Pfam, Gene3D, SMART, SMART, ProSiteProfiles, Pfam, CDD, CDD, SUPERFAMILY, PANTHER, Gene3D, ProSiteProfiles	PF00005, PTHR19211, SSF52540, PF12848, G3DSA:3.40.50.300, SM00382, SM00382, PS50893, PF00005, cd03221, cd03221, SSF52540, PTHR19211:SF96, G3DSA:3.40.50.300, PS50893	ABC transporter, ABC transporter, ATP-binding cassette, ABC transporter-type domain profile., ABC transporter, ABCF_EF-3, ABCF_EF-3, ATP-binding cassette, ABC transporter-type domain profile.	IPR003439, IPR027417, IPR032781, IPR003593, IPR003593, IPR003439, IPR003439, IPR027417, IPR003439	ABC transporter-like, P-loop containing nucleoside triphosphate hydrolase, ABC-transporter extension domain, AAA+ ATPase domain, AAA+ ATPase domain, ABC transporter-like, ABC transporter-like, P-loop containing nucleoside triphosphate hydrolase, ABC transporter-like	GO:0005524, GO:0016887, GO:0005524, GO:0016887, GO:0005524, GO:0016887, GO:0005524, GO:0016887
NZ_CP050969.1_169_41	675817.VDA_000884	2.3e-53	217.2	Vibrionales	lapD			ko:K18765					ko00000,ko03019				Bacteria	1MUQV@1224,1RN0Q@1236,1XU7X@135623,COG2199@1,COG2199@2,COG2200@1,COG2200@2	NA|NA|NA	T	COG2199 FOG GGDEF domain	Gene3D, Pfam, SMART, SMART, ProSiteProfiles, SUPERFAMILY, PANTHER, CDD, Pfam, Gene3D, SUPERFAMILY, SMART, ProSiteProfiles	G3DSA:3.20.20.450, PF00563, SM00267, SM00052, PS50885, SSF141868, PTHR33121, cd01948, PF00990, G3DSA:3.30.70.270, SSF55073, SM00304, PS50883	EAL domain, HAMP domain profile., EAL, Diguanylate cyclase, GGDEF domain, EAL domain profile.	IPR035919, IPR001633, IPR000160, IPR001633, IPR003660, IPR035919, IPR001633, IPR000160, IPR029787, IPR003660, IPR001633	EAL domain superfamily, EAL domain, GGDEF domain, EAL domain, HAMP domain, EAL domain superfamily, EAL domain, GGDEF domain, Nucleotide cyclase, HAMP domain, EAL domain	GO:0007165, GO:0016021, GO:0007165, GO:0016021
NZ_CP050969.1_169_42	1073999.BN137_801	2e-65	255.4	Gammaproteobacteria	yaeQ												Bacteria	1RDR9@1224,1S43N@1236,COG4681@1,COG4681@2	NA|NA|NA	S	protein conserved in bacteria	PANTHER, Pfam, SUPERFAMILY, Gene3D, PIRSF, SMART	PTHR38784, PF07152, SSF52980, G3DSA:3.10.640.10, PIRSF011484, SM01322	YaeQ protein, nan]	IPR009822, IPR009822, IPR011335, IPR038590, IPR009822, IPR009822	YaeQ, YaeQ, Restriction endonuclease type II-like, YaeQ superfamily, YaeQ, YaeQ		Reactome: R-HSA-6783310
NZ_CP050969.1_169_5	590409.Dd586_2309	9.6e-260	902.5	Dickeya	hcp	GO:0000302,GO:0001505,GO:0003674,GO:0003824,GO:0004601,GO:0006807,GO:0006950,GO:0006979,GO:0008150,GO:0008152,GO:0009056,GO:0009636,GO:0009987,GO:0010035,GO:0016209,GO:0016491,GO:0016661,GO:0016684,GO:0017144,GO:0034641,GO:0042133,GO:0042135,GO:0042221,GO:0042493,GO:0042542,GO:0042737,GO:0044237,GO:0044248,GO:0044270,GO:0046209,GO:0046210,GO:0046677,GO:0050418,GO:0050896,GO:0051716,GO:0055114,GO:…	1.7.99.1	ko:K05601	ko00910,map00910		R00143	RC02797	ko00000,ko00001,ko01000				Bacteria	1N88B@1224,1RP1I@1236,2JDWQ@204037,COG0369@1,COG1151@2	NA|NA|NA	C	Catalyzes the reduction of hydroxylamine to form NH(3) and H(2)O	CDD, Gene3D, Hamap, PANTHER, Gene3D, Gene3D, Gene3D, PIRSF, Pfam, PANTHER, SUPERFAMILY, TIGRFAM	cd01914, G3DSA:3.40.50.2030, MF_00069, PTHR30109, G3DSA:1.20.1270.20, G3DSA:1.20.1270.20, G3DSA:3.40.50.2030, PIRSF000076, PF03063, PTHR30109:SF0, SSF56821, TIGR01703	HCP, Hydroxylamine reductase [hcp]., Prismane/CO dehydrogenase family, hybrid_clust: hydroxylamine reductase	IPR010048, IPR016099, IPR010048, IPR004137, IPR016100, IPR016100, IPR016099, IPR010048, IPR004137, IPR010048, IPR011254, IPR010048	Hydroxylamine reductase, Prismane-like, alpha/beta-sandwich, Hydroxylamine reductase, Hydroxylamine reductase/Ni-containing CO dehydrogenase, Prismane, alpha-bundle, Prismane, alpha-bundle, Prismane-like, alpha/beta-sandwich, Hydroxylamine reductase, Hydroxylamine reductase/Ni-containing CO dehydrogenase, Hydroxylamine reductase, Prismane-like superfamily, Hydroxylamine reductase	GO:0005737, GO:0016661, GO:0051536, GO:0055114, GO:0003824, GO:0055114, GO:0005737, GO:0016661, GO:0051536, GO:0055114, GO:0016491, GO:0055114, GO:0003824, GO:0055114, GO:0003824, GO:0055114, GO:0003824, GO:0055114, GO:0005737, GO:0016661, GO:0051536, GO:0055114, GO:0016491, GO:0055114, GO:0005737, GO:0016661, GO:0051536, GO:0055114, GO:0003824, GO:0016491, GO:0055114, GO:0005737, GO:0016661, GO:…	KEGG: 00910+1.7.99.1, KEGG: 00910+1.7.99.1, KEGG: 00910+1.7.99.1, KEGG: 00910+1.7.99.1, KEGG: 00910+1.7.99.1, KEGG: 00910+1.7.99.1, KEGG: 00910+1.7.99.1, KEGG: 00910+1.7.99.1, KEGG: 00910+1.7.99.1, KEGG: 00910+1.7.99.1, KEGG: 00910+1.7.99.1
NZ_CP050969.1_169_6	1111728.ATYS01000008_gene1497	1.9e-94	352.8	Gammaproteobacteria	hcr	GO:0000166,GO:0003674,GO:0003824,GO:0005488,GO:0008150,GO:0008152,GO:0016491,GO:0016651,GO:0036094,GO:0043167,GO:0043168,GO:0048037,GO:0050660,GO:0050662,GO:0051536,GO:0051537,GO:0051540,GO:0055114,GO:0097159,GO:1901265,GO:1901363		ko:K11933					ko00000,ko01000				Bacteria	1MY2Q@1224,1RR5A@1236,COG1018@1,COG1018@2	NA|NA|NA	C	oxidoreductase	PRINTS, PRINTS, PRINTS, Pfam, Gene3D, SUPERFAMILY, CDD, Gene3D, ProSitePatterns, CDD, Pfam, ProSiteProfiles, ProSiteProfiles, Pfam, Gene3D, SUPERFAMILY, PRINTS, PRINTS, PRINTS, PRINTS, SUPERFAMILY, PANTHER, PANTHER	PR00406, PR00406, PR00406, PF00970, G3DSA:3.10.20.30, SSF63380, cd06215, G3DSA:2.40.30.10, PS00197, cd00207, PF00175, PS51085, PS51384, PF00111, G3DSA:3.40.50.80, SSF52343, PR00371, PR00371, PR00371, PR00371, SSF54292, PTHR19370, PTHR19370:SF181	Cytochrome B5 reductase signature, Cytochrome B5 reductase signature, Cytochrome B5 reductase signature, Oxidoreductase FAD-binding domain, FNR_iron_sulfur_binding_1, 2Fe-2S ferredoxin-type iron-sulfur binding region signature., fer2, Oxidoreductase NAD-binding domain, 2Fe-2S ferredoxin-type iron-sulfur binding domain profile., Ferredoxin reductase-type FAD binding domain profile., 2Fe-2S iron-su…	IPR001834, IPR001834, IPR001834, IPR008333, IPR012675, IPR017938, IPR006058, IPR001041, IPR001433, IPR001041, IPR017927, IPR001041, IPR039261, IPR039261, IPR001709, IPR001709, IPR001709, IPR001709, IPR036010	NADH:cytochrome b5 reductase (CBR), NADH:cytochrome b5 reductase (CBR), NADH:cytochrome b5 reductase (CBR), Flavoprotein pyridine nucleotide cytochrome reductase-like, FAD-binding domain, Beta-grasp domain superfamily, Riboflavin synthase-like beta-barrel, 2Fe-2S ferredoxin, iron-sulphur binding site, 2Fe-2S ferredoxin-type iron-sulfur binding domain, Oxidoreductase FAD/NAD(P)-binding, 2Fe-2S fer…	GO:0016491, GO:0055114, GO:0016491, GO:0055114, GO:0016491, GO:0055114, GO:0051537, GO:0009055, GO:0051536, GO:0016491, GO:0055114, GO:0009055, GO:0051536, GO:0016491, GO:0055114, GO:0009055, GO:0051536, GO:0016491, GO:0055114, GO:0016491, GO:0055114, GO:0016491, GO:0055114, GO:0016491, GO:0055114, GO:0009055, GO:0051536	Reactome: R-HSA-1237044, Reactome: R-HSA-1237044, Reactome: R-HSA-1237044, Reactome: R-HSA-1237044, nan]
NZ_CP050969.1_169_7	502347.ESCAB7627_2557	5.2e-189	667.2	Escherichia	kch	GO:0003674,GO:0005215,GO:0005488,GO:0005515,GO:0005575,GO:0005623,GO:0005886,GO:0005887,GO:0006810,GO:0006811,GO:0006812,GO:0006813,GO:0008150,GO:0008324,GO:0009987,GO:0015075,GO:0015318,GO:0015672,GO:0016020,GO:0016021,GO:0016043,GO:0022607,GO:0022857,GO:0022890,GO:0030001,GO:0031224,GO:0031226,GO:0034220,GO:0042802,GO:0043933,GO:0044085,GO:0044425,GO:0044459,GO:0044464,GO:0051179,GO:0051234,GO:…		ko:K10716					ko00000,ko02000	1.A.1.1,1.A.1.13,1.A.1.17,1.A.1.24,1.A.1.25,1.A.1.6		iEC042_1314.EC042_1304,iECUMN_1333.ECUMN_1549	Bacteria	1R3QQ@1224,1RPFS@1236,3XNGG@561,COG1226@1,COG1226@2	NA|NA|NA	P	Potassium channel	MobiDBLite, Pfam, Gene3D, PANTHER, PANTHER, Gene3D, ProSiteProfiles, SUPERFAMILY, Pfam, SUPERFAMILY	mobidb-lite, PF02254, G3DSA:1.10.287.70, PTHR16254, PTHR16254:SF39, G3DSA:3.40.50.720, PS51201, SSF81324, PF07885, SSF51735	consensus disorder prediction, TrkA-N domain,RCK N-terminal domain profile., Ion channel	IPR003148,IPR003148, IPR013099, IPR036291	Regulator of K+ conductance, N-terminal,Regulator of K+ conductance, N-terminal, Potassium channel domain, NAD(P)-binding domain superfamily	GO:0006813,GO:0006813
NZ_CP050969.1_169_8	932213.SPM24T3_15361	2.1e-23	115.5	Serratia			5.3.3.1	ko:K01822,ko:K21972	ko00140,ko00984,ko01100,ko01120,map00140,map00984,map01100,map01120	M00107,M00110	R01837,R02216,R02499,R02840,R03327,R04163,R04678,R04849,R09955	RC00146,RC00762	ko00000,ko00001,ko00002,ko01000,ko03000				Bacteria	1MZS5@1224,1S8VN@1236,403US@613,COG3631@1,COG3631@2	NA|NA|NA	S	SnoaL-like domain	Gene3D, Coils, SUPERFAMILY, Pfam	G3DSA:3.10.450.50, Coil, SSF54427, PF12680	SnoaL-like domain	IPR032710, IPR037401	NTF2-like domain superfamily, SnoaL-like domain
NZ_CP050969.1_169_9	1268237.G114_13448	2.5e-183	648.3	Aeromonadales	pyrP			ko:K02824					ko00000,ko02000	2.A.40.1.1,2.A.40.1.2		iLJ478.TM0819	Bacteria	1MUN9@1224,1RRK5@1236,1Y45Y@135624,COG2233@1,COG2233@2	NA|NA|NA	F	Permease family	ProSitePatterns, PANTHER, PANTHER, TIGRFAM, Pfam	PS01116, PTHR11119, PTHR11119:SF49, TIGR00801, PF00860	Xanthine/uracil permeases family signature., ncs2: uracil-xanthine permease, Permease family	IPR006042, IPR029935, IPR006042, IPR006043	Xanthine/uracil permease, Uracil permease, Xanthine/uracil permease, Xanthine/uracil/vitamin C permease	GO:0005215, GO:0016020, GO:0055085, GO:0015210, GO:0015857, GO:0016021, GO:0005215, GO:0016020, GO:0055085, GO:0016020, GO:0022857, GO:0055085	Reactome: R-HSA-196836, Reactome: R-HSA-196836
NZ_CP050969.1_173_1	1005994.GTGU_01211	5.5e-101	374.4	Gammaproteobacteria				ko:K06905					ko00000				Bacteria	1MXT8@1224,1RMKC@1236,COG3500@1,COG3500@2	NA|NA|NA	S	late control	Pfam, SUPERFAMILY	PF05954, SSF69279	Phage late control gene D protein (GPD)
NZ_CP050969.1_173_2	NA	NA	NA	NA	NA	NA	NA	NA	NA	NA	NA	NA	NA	NA	NA	NA	NA	NA	NA	NA	NA	Gene3D, Pfam	G3DSA:3.10.350.10, PF05489	Phage Tail Protein X	IPR036779, IPR008861	LysM domain superfamily, Phage Tail Protein X-like
NZ_CP050969.1_173_3	1005994.GTGU_01213	1.5e-23	115.9	Bacteria				ko:K06906					ko00000				Bacteria	COG3499@1,COG3499@2	NA|NA|NA	S	P2 GpU family protein	Pfam	PF06995	Phage P2 GpU	IPR009734	Myoviridae, GpU
NZ_CP050969.1_174_1	1005994.GTGU_01214	4.9e-106	392.5	Gammaproteobacteria													Bacteria	1NFKU@1224,1RP2D@1236,COG5283@1,COG5283@2	NA|NA|NA	D	phage tail tape measure protein	MobiDBLite, MobiDBLite, PANTHER, Coils, Coils, TIGRFAM, Coils, Pfam, Coils, Coils, MobiDBLite	mobidb-lite, mobidb-lite, PTHR37813, Coil, Coil, TIGR01760, Coil, PF10145, Coil, Coil, mobidb-lite	consensus disorder prediction, consensus disorder prediction, tape_meas_TP901: phage tail tape measure protein, TP901 family, core region, Phage-related minor tail protein, consensus disorder prediction	IPR010090, IPR010090	Phage tail tape measure protein, Phage tail tape measure protein
NZ_CP050969.1_174_2	1005994.GTGU_01215	1.6e-21	109.8	Gammaproteobacteria													Bacteria	1NKIM@1224,1SJEV@1236,2EVB8@1,33NRU@2	NA|NA|NA			NA	NA	NA	NA	NA	NA	NA
NZ_CP050969.1_174_3	717774.Marme_1854	1.2e-27	129.8	Gammaproteobacteria				ko:K06908					ko00000				Bacteria	1N8X5@1224,1SFK0@1236,COG3498@1,COG3498@2	NA|NA|NA	S	Phage tail tube protein FII	Pfam	PF04985	Phage tail tube protein FII	IPR006498	Tail tube protein
NZ_CP050969.1_174_4	1005994.GTGU_01217	8.7e-140	503.8	Gammaproteobacteria				ko:K06907					ko00000				Bacteria	1RCA9@1224,1S2Z0@1236,COG3497@1,COG3497@2	NA|NA|NA	S	tail sheath protein	PANTHER, PANTHER	PTHR35861, PTHR35861:SF1
NZ_CP050969.1_175_1	754331.AEME01000001_gene790	1.6e-17	96.3	Escherichia													Bacteria	1MWNN@1224,1RR74@1236,3XQD4@561,COG5301@1,COG5301@2	NA|NA|NA	S	Phage tail-collar fibre protein	MobiDBLite, Pfam	mobidb-lite, PF12571	consensus disorder prediction, Phage tail-collar fibre protein	IPR022225	Phage tail fibre protein
NZ_CP050969.1_175_10	1080067.BAZH01000027_gene3183	1.5e-141	509.2	Citrobacter	JD73_18860												Bacteria	1PPA2@1224,1RZPQ@1236,2C57E@1,2Z8WK@2,3WYY2@544	NA|NA|NA	S	Phage major capsid protein E	Gene3D, Coils, Pfam, Gene3D	G3DSA:3.30.1930.10, Coil, PF03864, G3DSA:3.15.30.10	Phage major capsid protein E	IPR005564	Major capsid protein GpE
NZ_CP050969.1_175_11	10713.E4WL24_BPPH8	1e-27	129.4	Siphoviridae		GO:0005575,GO:0018995,GO:0019012,GO:0019028,GO:0030430,GO:0033643,GO:0033646,GO:0043656,GO:0043657,GO:0044215,GO:0044216,GO:0044217,GO:0044423,GO:0098021											Viruses	4QC10@10239,4QKP7@10699,4QPJC@28883,4QXEU@35237	NA|NA|NA	S	Bacteriophage lambda head decoration protein D	SUPERFAMILY, Gene3D, ProDom	SSF51274, G3DSA:2.40.300.10, PD020518	CAPSID HEAD PROPHAGE DECORATION SUBUNIT SMALL 3D-STRUCTURE MAJOR GIFSY-1 STRUCTURAL	IPR036630, IPR004195	Head decoration protein D superfamily, Head decoration protein D
NZ_CP050969.1_175_12	481805.EcolC_2094	4.3e-135	488	Escherichia	sppA			ko:K04773,ko:K04774,ko:K21511					ko00000,ko01000,ko01002				Bacteria	1QGPW@1224,1RZZW@1236,3XNW2@561,COG0616@1,COG0616@2	NA|NA|NA	OU	Peptidase family S49	SUPERFAMILY, CDD, Gene3D, Pfam, PANTHER, Gene3D	SSF52096, cd07022, G3DSA:3.40.1750.20, PF01343, PTHR33209, G3DSA:3.90.226.10	S49_Sppa_36K_type, Peptidase family S49	IPR029045, IPR033855, IPR002142	ClpP/crotonase-like domain superfamily, Bacteriophage protein C, Peptidase S49	GO:0006508, GO:0008233
NZ_CP050969.1_175_13	469008.B21_00733	5.7e-225	786.9	Escherichia	JD73_18735												Bacteria	1MVN4@1224,1RPUT@1236,3XQ5D@561,COG5511@1,COG5511@2	NA|NA|NA	S	Phage portal protein, lambda family	TIGRFAM, Pfam	TIGR01539, PF05136	portal_lambda: phage portal protein, lambda family, Phage portal protein, lambda family	IPR006429, IPR006429	Phage portal protein, lambda family, Phage portal protein, lambda family	GO:0005198, GO:0019068, GO:0005198, GO:0019068
NZ_CP050969.1_175_14	199310.c3172	4.5e-18	96.7	Escherichia	W												Bacteria	1NJ8E@1224,1SHCP@1236,2EHEK@1,33B6I@2,3XQ04@561	NA|NA|NA	S	gpW	ProDom, Pfam, SUPERFAMILY, Coils, Gene3D	PD019366, PF02831, SSF64210, Coil, G3DSA:3.30.1580.10	PROPHAGE HEAD JOINING GP3 COMPLETION HEAD-TO-TAIL W PROPHAGE-DERIVED DNA HEAD-TAIL, gpW	IPR004174, IPR004174, IPR036626, IPR036626	Head-to-tail joining protein W, Head-to-tail joining protein W, Head-to-tail joining protein W superfamily, Head-to-tail joining protein W superfamily	GO:0019058, GO:0019058, GO:0019058, GO:0019058
NZ_CP050969.1_175_15	35703.DQ02_13830	6.7e-305	1052.7	Citrobacter			3.1.21.4	ko:K21512					ko00000,ko01000				Bacteria	1MVS3@1224,1RRH5@1236,3WYY1@544,COG5525@1,COG5525@2	NA|NA|NA	S	Phage terminase large subunit (GpA)	Pfam, PANTHER, Coils, PANTHER, Gene3D	PF05876, PTHR34413, Coil, PTHR34413:SF2, G3DSA:3.40.50.300	Phage terminase large subunit (GpA), nan]	IPR008866, nan]	Bacteriophage lambda, GpA, nan]
NZ_CP050969.1_175_16	667121.ET1_05_01120	2.8e-48	198.4	Gammaproteobacteria				ko:K22014					ko00000				Bacteria	1RFQ1@1224,1S4F5@1236,COG4220@1,COG4220@2	NA|NA|NA	L	Phage DNA packaging protein Nu1	Pfam	PF07471	Phage DNA packaging protein Nu1	IPR010906	Bacteriophage lambda, Nu1, terminase small subunit
NZ_CP050969.1_175_17	598467.BrE312_2414	3.8e-30	138.3	Gammaproteobacteria													Bacteria	1NA8H@1224,1SA7Y@1236,2EDZZ@1,337UT@2	NA|NA|NA	S	Protein of unknown function (DUF2514)	Pfam, Coils	PF10721, Coil	Protein of unknown function (DUF2514)	IPR019659	Protein of unknown function DUF2514
NZ_CP050969.1_175_2	1005994.GTGU_01221	1e-33	150.2	Gammaproteobacteria													Bacteria	1NPRR@1224,1SIDS@1236,COG4385@1,COG4385@2	NA|NA|NA	S	Phage tail protein (Tail_P2_I)	Pfam	PF09684	Phage tail protein (Tail_P2_I)	IPR006521	Tail protein I
NZ_CP050969.1_175_3	1005994.GTGU_01222	1.4e-91	343.2	Gammaproteobacteria													Bacteria	1RIMI@1224,1S8MK@1236,COG3948@1,COG3948@2	NA|NA|NA	S	Baseplate J protein	Pfam, PANTHER, PANTHER, PIRSF, PANTHER, PANTHER	PF04865, PTHR35862:SF1, PTHR35862, PIRSF020481, PTHR35862:SF1, PTHR35862	Baseplate J-like protein,nan]	IPR006949, IPR014507	Baseplate protein J-like, Baseplate assembly protein J, predicted
NZ_CP050969.1_175_4	261726.A2I2X7_9CAUD	1.4e-16	92.4	Myoviridae													Viruses	4QAZ7@10239,4QHXC@10662,4QTYE@28883,4R0NI@35237	NA|NA|NA			SUPERFAMILY, Gene3D	SSF160719, G3DSA:3.10.450.40
NZ_CP050969.1_175_5	1005994.GTGU_01224	1.9e-37	162.5	Gammaproteobacteria													Bacteria	1NDPF@1224,1SE32@1236,COG4540@1,COG4540@2	NA|NA|NA	S	Type VI secretion system, phage-baseplate injector	Pfam, Gene3D	PF04717, G3DSA:2.40.50.230	Type VI secretion system, phage-baseplate injector	IPR006531, IPR037026	Gp5 N-terminal, Vgr protein, OB-fold domain superfamily
NZ_CP050969.1_175_6	261726.A2I2X3_9CAUD	4.6e-22	111.3	Myoviridae													Viruses	4QFG8@10239,4QJ2K@10662,4QTVN@28883,4QW2I@35237	NA|NA|NA			NA	NA	NA	NA	NA	NA	NA
NZ_CP050969.1_175_7	1120963.KB894494_gene3652	6.2e-17	94.4	Proteobacteria													Bacteria	1NB15@1224,2EM3Q@1,33ET7@2	NA|NA|NA			NA	NA	NA	NA	NA	NA	NA
NZ_CP050969.1_175_8	NA	NA	NA	NA	NA	NA	NA	NA	NA	NA	NA	NA	NA	NA	NA	NA	NA	NA	NA	NA	NA	Gene3D	G3DSA:2.40.10.180
NZ_CP050969.1_175_9	NA	NA	NA	NA	NA	NA	NA	NA	NA	NA	NA	NA	NA	NA	NA	NA	NA	NA	NA	NA	NA	Coils, Gene3D, Pfam	Coil, G3DSA:3.40.5.70, PF14000	DNA packaging protein FI	IPR025147	DNA packaging protein FI
NZ_CP050969.1_177_1	945083.W0LI70_9CAUD	1.8e-17	94.4	Siphoviridae													Viruses	4QHC8@10239,4QKZT@10699,4QSRC@28883,4QZ9A@35237	NA|NA|NA	S	D-alanyl-D-alanine carboxypeptidase	Gene3D, Pfam, SUPERFAMILY	G3DSA:3.30.1380.10, PF13539, SSF55166	D-alanyl-D-alanine carboxypeptidase	IPR009045, IPR039561, IPR009045	Hedgehog signalling/DD-peptidase zinc-binding domain superfamily, Peptidase M15C, Hedgehog signalling/DD-peptidase zinc-binding domain superfamily	GO:0008233	Reactome: R-HSA-373080|Reactome: R-HSA-5358346|Reactome: R-HSA-5362798|Reactome: R-HSA-5632681|Reactome: R-HSA-5632684|Reactome: R-HSA-5635838|Reactome: R-HSA-5658034, Reactome: R-HSA-373080|Reactome: R-HSA-5358346|Reactome: R-HSA-5362798|Reactome: R-HSA-5632681|Reactome: R-HSA-5632684|Reactome: R-HSA-5635838|Reactome: R-HSA-5658034
NZ_CP050969.1_178_1	471874.PROSTU_03067	2.2e-07	60.5	Gammaproteobacteria	Z012_12330			ko:K02395,ko:K03791,ko:K17733					ko00000,ko01000,ko01002,ko01011,ko02035		GH19		Bacteria	1RICX@1224,1S6D5@1236,COG3108@1,COG3108@2	NA|NA|NA	S	peptidase M15	NA	NA	NA	NA	NA	NA	NA
NZ_CP050969.1_178_10	1205683.CAKR01000013_gene1210	2.1e-62	245.7	Yersinia													Bacteria	1PBX0@1224,1SWNV@1236,2CB53@1,2ZB3U@2,41H0M@629	NA|NA|NA	L	Replication protein P	Pfam	PF06992	Replication protein P	IPR009731	Replication P	GO:0006270
NZ_CP050969.1_178_11	1278971.AOGF01000042_gene319	3e-52	212.2	Pasteurellales				ko:K19505,ko:K21885					ko00000,ko03000				Bacteria	1R194@1224,1T4WW@1236,1Y94K@135625,COG0640@1,COG0640@2	NA|NA|NA	K	Helix-turn-helix domain	SUPERFAMILY, Pfam, MobiDBLite, Gene3D	SSF46785, PF13730, mobidb-lite, G3DSA:1.10.10.10	Helix-turn-helix domain, consensus disorder prediction	IPR036390, IPR036388	Winged helix DNA-binding domain superfamily, Winged helix-like DNA-binding domain superfamily
NZ_CP050969.1_178_12	932213.SPM24T3_13945	2.3e-31	141.4	Gammaproteobacteria													Bacteria	1P00N@1224,1SSP8@1236,2ES8Y@1,33JTN@2	NA|NA|NA	S	regulatory protein CII	Pfam, Gene3D	PF05269, G3DSA:1.10.260.40	Bacteriophage CII protein	IPR007933	Transcription activator CII	GO:0003677, GO:0006355
NZ_CP050969.1_178_2	393598.A5X9I3_9CAUD	1e-24	119.4	Myoviridae		GO:0001906,GO:0001907,GO:0003674,GO:0005215,GO:0005575,GO:0006810,GO:0008150,GO:0015267,GO:0016032,GO:0018995,GO:0019048,GO:0019058,GO:0019076,GO:0020002,GO:0022803,GO:0022857,GO:0031640,GO:0033643,GO:0033644,GO:0034290,GO:0034291,GO:0035821,GO:0035890,GO:0035891,GO:0039633,GO:0040011,GO:0043657,GO:0044003,GO:0044004,GO:0044215,GO:0044216,GO:0044217,GO:0044218,GO:0044279,GO:0044364,GO:0044403,GO:…											Viruses	4QANN@10239,4QIIQ@10662,4QQKA@28883,4QWIF@35237	NA|NA|NA	S	Pfam:Phage_holin_3_1	Pfam, TIGRFAM	PF05106, TIGR01594	Phage holin family (Lysis protein S), holin_lambda: phage holin, lambda family	IPR006481, IPR006481	Bacteriophage lambda, GpS, holin, Bacteriophage lambda, GpS, holin
NZ_CP050969.1_178_3	1443113.LC20_03908	9.9e-133	479.9	Yersinia			2.1.1.72	ko:K00571,ko:K07319					ko00000,ko01000,ko02048				Bacteria	1QUB9@1224,1RMSJ@1236,41FHV@629,COG2189@1,COG2189@2	NA|NA|NA	L	DNA methylase	ProSitePatterns, PANTHER, PRINTS, PRINTS, PRINTS, PRINTS, PRINTS, SUPERFAMILY, Gene3D, Gene3D, Coils, PANTHER, Pfam	PS00092, PTHR13370, PR00508, PR00508, PR00508, PR00508, PR00508, SSF53335, G3DSA:3.40.50.150, G3DSA:3.40.50.150, Coil, PTHR13370:SF8, PF01555	N-6 Adenine-specific DNA methylases signature., S21 class N4 adenine-specific DNA methyltransferase signature, S21 class N4 adenine-specific DNA methyltransferase signature, S21 class N4 adenine-specific DNA methyltransferase signature, S21 class N4 adenine-specific DNA methyltransferase signature, S21 class N4 adenine-specific DNA methyltransferase signature, DNA methylase	IPR002052, IPR001091, IPR001091, IPR001091, IPR001091, IPR001091, IPR029063,IPR002941	DNA methylase, N-6 adenine-specific, conserved site, Restriction/modification DNA-methylase, Restriction/modification DNA-methylase, Restriction/modification DNA-methylase, Restriction/modification DNA-methylase, Restriction/modification DNA-methylase, S-adenosyl-L-methionine-dependent methyltransferase,DNA methylase N-4/N-6	GO:0003676, GO:0008168, GO:0032259, GO:0003677, GO:0006306, GO:0008170, GO:0003677, GO:0006306, GO:0008170, GO:0003677, GO:0006306, GO:0008170, GO:0003677, GO:0006306, GO:0008170, GO:0003677, GO:0006306, GO:0008170, GO:0003677, GO:0006306, GO:0008170
NZ_CP050969.1_178_5	1168549.I6S672_9CAUD	3.1e-52	211.5	Siphoviridae													Viruses	4QKYX@10699	NA|NA|NA	S	negative regulation of DNA-dependent transcription, termination	Pfam	PF06530	Phage antitermination protein Q	IPR010534	Bacteriophage 933W, GpQ	GO:0003677, GO:0060567
NZ_CP050969.1_178_6	1115512.EH105704_01_02490	9e-67	259.6	Gammaproteobacteria													Bacteria	1N1AU@1224,1SNCF@1236,2E1TC@1,32X37@2	NA|NA|NA	S	Psort location Cytoplasmic, score 8.96	Gene3D	G3DSA:3.30.40.60
NZ_CP050969.1_179_1	1484158.PSNIH1_00655	8.8e-08	62.8	Gammaproteobacteria													Bacteria	1P4JF@1224,1SV1J@1236,28W97@1,2ZI9Q@2	NA|NA|NA			NA	NA	NA	NA	NA	NA	NA
NZ_CP050969.1_179_2	NA	NA	NA	NA	NA	NA	NA	NA	NA	NA	NA	NA	NA	NA	NA	NA	NA	NA	NA	NA	NA	Pfam	PF02061	Lambda Phage CIII	IPR013056	Bacteriophage lambda, CIII, regulatory protein
NZ_CP050969.1_179_5	380703.AHA_2020	8.6e-176	623.2	Gammaproteobacteria				ko:K10906					ko00000,ko01000,ko03400				Bacteria	1QUEK@1224,1T1W3@1236,2DBBN@1,2Z88V@2	NA|NA|NA	S	PDDEXK-like domain of unknown function (DUF3799)	Pfam, Gene3D, Gene3D	PF12684, G3DSA:3.90.320.10, G3DSA:3.90.320.10	PDDEXK-like domain of unknown function (DUF3799)	IPR024432, IPR011604, IPR011604	Putative exodeoxyribonuclease 8, PDDEXK-like domain, Exonuclease, phage-type/RecB, C-terminal, Exonuclease, phage-type/RecB, C-terminal
NZ_CP050969.1_18_1	469595.CSAG_04718	1.2e-56	225.7	Citrobacter				ko:K07497					ko00000				Bacteria	1MVXQ@1224,1RR4F@1236,3WZ0P@544,COG2801@1,COG2801@2	NA|NA|NA	L	26 bp terminal inverted repeat of ISEc14, contains 4 mismatches	ProSiteProfiles, Gene3D, PANTHER, Pfam, SUPERFAMILY	PS50994, G3DSA:3.30.420.10, PTHR42648, PF00665, SSF53098	Integrase catalytic domain profile., Integrase core domain	IPR001584, IPR036397, IPR038965, IPR001584, IPR012337	Integrase, catalytic core, Ribonuclease H superfamily, Transposase InsF-like, Integrase, catalytic core, Ribonuclease H-like superfamily	GO:0015074, GO:0003676, GO:0032196, GO:0015074
NZ_CP050969.1_180_1	399795.CtesDRAFT_PD3322	7.5e-26	123.2	Proteobacteria	STY2074												Bacteria	1MXNC@1224,28JXH@1,2Z9MZ@2	NA|NA|NA	S	RecT family	Pfam	PF03837	RecT family	IPR018330	RecT family	GO:0003677, GO:0006259
NZ_CP050969.1_181_1	399795.CtesDRAFT_PD3322	2.7e-26	125.2	Proteobacteria	STY2074												Bacteria	1MXNC@1224,28JXH@1,2Z9MZ@2	NA|NA|NA	S	RecT family	MobiDBLite, Pfam	mobidb-lite, PF03837	consensus disorder prediction, RecT family	IPR018330	RecT family	GO:0003677, GO:0006259
NZ_CP050969.1_185_1	22034116506078	2.1e-21	108.2	Gammaproteobacteria													Bacteria	1N6M4@1224,1SANP@1236,2E1TT@1,32X3I@2	NA|NA|NA			NA	NA	NA	NA	NA	NA	NA
NZ_CP050969.1_186_1	585.DR95_1863	5.1e-81	307.8	Proteus	rdgC	GO:0000018,GO:0003674,GO:0003676,GO:0003677,GO:0003690,GO:0003697,GO:0005488,GO:0005575,GO:0005622,GO:0005623,GO:0005737,GO:0005829,GO:0008150,GO:0009295,GO:0019219,GO:0019222,GO:0031323,GO:0043226,GO:0043228,GO:0043229,GO:0043232,GO:0043590,GO:0044424,GO:0044444,GO:0044464,GO:0050789,GO:0050794,GO:0051052,GO:0051171,GO:0060255,GO:0065007,GO:0080090,GO:0097159,GO:1901363		ko:K03554					ko00000,ko03400				Bacteria	1MXPR@1224,1RMNN@1236,3Z1I9@583,COG2974@1,COG2974@2	NA|NA|NA	J	May be involved in recombination	Coils, Pfam, PANTHER	Coil, PF04381, PTHR38103	Putative exonuclease, RdgC	IPR007476, IPR007476	Putative exonuclease, RdgC, Putative exonuclease, RdgC	GO:0006310, GO:0006310
NZ_CP050969.1_188_1	76869.PputGB1_3465	8e-12	77	Gammaproteobacteria													Bacteria	1RKP6@1224,1S6DG@1236,2E6ZB@1,331IH@2	NA|NA|NA			NA	NA	NA	NA	NA	NA	NA
NZ_CP050969.1_188_2	NA	NA	NA	NA	NA	NA	NA	NA	NA	NA	NA	NA	NA	NA	NA	NA	NA	NA	NA	NA	NA	Pfam, SUPERFAMILY, Gene3D	PF07825, SSF46955, G3DSA:1.10.1660.20	Excisionase-like protein	IPR012884, IPR009061, IPR038137	Excisionase-like, Putative DNA-binding domain superfamily, Excisionase-like superfamily	GO:0003677, GO:0006310
NZ_CP050969.1_188_3	667121.ET1_05_00800	7.5e-17	92.8	Gammaproteobacteria													Bacteria	1MX7E@1224,1RNX5@1236,COG0582@1,COG0582@2	NA|NA|NA	L	Belongs to the phage integrase family	Pfam, Gene3D, SUPERFAMILY	PF09003, G3DSA:3.30.160.60, SSF54171	Bacteriophage lambda integrase, Arm DNA-binding domain	IPR015094, IPR016177	Integrase, lambda-type, N-terminal DNA-binding, DNA-binding domain superfamily	GO:0003677, GO:0008907, GO:0015074, GO:0003677
NZ_CP050969.1_19_1	754436.JCM19237_5543	3e-54	217.6	Vibrionales	yjaB			ko:K03827					ko00000,ko01000				Bacteria	1RI35@1224,1S66W@1236,1XWYT@135623,COG0454@1,COG0456@2	NA|NA|NA	K	Acetyltransferase (GNAT) domain	ProSiteProfiles, CDD, Gene3D, PANTHER, SUPERFAMILY, Pfam	PS51186, cd04301, G3DSA:3.40.630.30, PTHR43800, SSF55729, PF13673	Gcn5-related N-acetyltransferase (GNAT) domain profile., NAT_SF, Acetyltransferase (GNAT) domain	IPR000182, IPR016181, IPR000182	GNAT domain, Acyl-CoA N-acyltransferase, GNAT domain
NZ_CP050969.1_191_1	579405.Dd703_1033	7e-27	127.1	Dickeya	ybbJ	GO:0005575,GO:0005623,GO:0005886,GO:0016020,GO:0044464,GO:0071944		ko:K07340					ko00000				Bacteria	1N241@1224,1S5W4@1236,2JE2Y@204037,COG1585@1,COG1585@2	NA|NA|NA	OU	NfeD-like C-terminal, partner-binding	SUPERFAMILY, Pfam, PANTHER, PANTHER, Gene3D	SSF141322, PF01957, PTHR33507, PTHR33507:SF3, G3DSA:2.40.50.140	NfeD-like C-terminal, partner-binding	IPR002810	NfeD-like, C-terminal domain
NZ_CP050969.1_191_10	1216966.BAUC01000004_gene2057	5.9e-128	463.8	Gammaproteobacteria	hchA	GO:0003674,GO:0003700,GO:0003824,GO:0005575,GO:0005622,GO:0005623,GO:0005737,GO:0005829,GO:0006081,GO:0006082,GO:0006089,GO:0006139,GO:0006259,GO:0006281,GO:0006355,GO:0006464,GO:0006517,GO:0006725,GO:0006807,GO:0006950,GO:0006974,GO:0008150,GO:0008152,GO:0009056,GO:0009058,GO:0009100,GO:0009268,GO:0009438,GO:0009628,GO:0009889,GO:0009987,GO:0010033,GO:0010447,GO:0010468,GO:0010556,GO:0016053,GO:…	3.5.1.124,4.2.1.130,5.3.1.6	ko:K01807,ko:K03152,ko:K05523	ko00030,ko00620,ko00710,ko01100,ko01110,ko01120,ko01130,ko01200,ko01230,map00030,map00620,map00710,map01100,map01110,map01120,map01130,map01200,map01230	M00004,M00007,M00165,M00167,M00580	R01056,R09796	RC00434,RC02658	ko00000,ko00001,ko00002,ko01000,ko01002				Bacteria	1R41H@1224,1RR9T@1236,COG0693@1,COG0693@2	NA|NA|NA	S	Protein and nucleotide deglycase that catalyzes the deglycation of the Maillard adducts formed between amino groups of proteins or nucleotides and reactive carbonyl groups of glyoxals. Thus, functions as a protein deglycase that repairs methylglyoxal- and glyoxal-glycated proteins, and releases repaired proteins and lactate or glycolate, respectively. Deglycates cysteine, arginine and lysine resi…	PIRSF, Gene3D, Pfam, PANTHER, SUPERFAMILY, PANTHER	PIRSF037798, G3DSA:3.40.50.880, PF01965, PTHR11019, SSF52317, PTHR11019:SF109	DJ-1/PfpI family	IPR017283, IPR029062, IPR002818, IPR029062, IPR017283	Protein/nucleic acid deglycase HchA, Class I glutamine amidotransferase-like, DJ-1/PfpI, Class I glutamine amidotransferase-like, Protein/nucleic acid deglycase HchA	GO:0036524,GO:0036524	Reactome: R-HSA-3899300
NZ_CP050969.1_191_100	634176.NT05HA_1277	2e-55	221.9	Pasteurellales	yciA	GO:0003674,GO:0003824,GO:0005575,GO:0005622,GO:0005623,GO:0005737,GO:0005829,GO:0006082,GO:0006139,GO:0006163,GO:0006629,GO:0006631,GO:0006637,GO:0006725,GO:0006732,GO:0006753,GO:0006790,GO:0006793,GO:0006796,GO:0006807,GO:0008150,GO:0008152,GO:0009117,GO:0009150,GO:0009259,GO:0009987,GO:0016289,GO:0016787,GO:0016788,GO:0016790,GO:0019637,GO:0019693,GO:0019752,GO:0032787,GO:0033865,GO:0033875,GO:…		ko:K10806	ko01040,map01040				ko00000,ko00001,ko01000,ko01004				Bacteria	1MZAZ@1224,1SA9N@1236,1Y8IS@135625,COG1607@1,COG1607@2	NA|NA|NA	I	Thioesterase superfamily	CDD, Gene3D, ProSiteProfiles, SUPERFAMILY, Pfam, PANTHER, PANTHER	cd03442, G3DSA:3.10.129.10, PS51770, SSF54637, PF03061, PTHR11049:SF5, PTHR11049	BFIT_BACH, Hotdog acyl-CoA thioesterase (ACOT)-type domain profile., Thioesterase superfamily	IPR033120, IPR029069, IPR006683	Hotdog acyl-CoA thioesterase (ACOT)-type domain, HotDog domain superfamily, Thioesterase domain		Reactome: R-HSA-77289, Reactome: R-HSA-77289
NZ_CP050969.1_191_101	382245.ASA_2160	6.1e-35	153.7	Aeromonadales	liuR												Bacteria	1RITY@1224,1S61S@1236,1Y5V7@135624,COG0789@1,COG0789@2	NA|NA|NA	K	helix_turn_helix, mercury resistance	Pfam, PANTHER, Coils, SUPERFAMILY, ProSiteProfiles, SMART, PANTHER, CDD, Gene3D	PF13411, PTHR30204, Coil, SSF46955, PS50937, SM00422, PTHR30204:SF16, cd04776, G3DSA:1.10.1660.10	MerR HTH family regulatory protein, MerR-type HTH domain profile., HTH_GnyR	IPR000551, IPR009061, IPR000551, IPR000551	MerR-type HTH domain, Putative DNA-binding domain superfamily, MerR-type HTH domain, MerR-type HTH domain	GO:0003677, GO:0006355, GO:0003677, GO:0006355, GO:0003677, GO:0006355
NZ_CP050969.1_191_102	319224.Sputcn32_3017	4.5e-152	545	Shewanellaceae				ko:K03406	ko02020,ko02030,map02020,map02030				ko00000,ko00001,ko02035				Bacteria	1MU9B@1224,1RMH0@1236,2Q98T@267890,COG0840@1,COG0840@2	NA|NA|NA	NT	PFAM histidine kinase, HAMP region domain protein	Gene3D, CDD, SUPERFAMILY, PANTHER, PRINTS, PRINTS, PRINTS, Coils, ProSiteProfiles, SMART, SMART, Gene3D, Gene3D, SMART, Pfam, PANTHER, CDD, ProSiteProfiles, Coils, SUPERFAMILY, Pfam, Pfam	G3DSA:1.10.287.950, cd11386, SSF58104, PTHR32089, PR00260, PR00260, PR00260, Coil, PS50885, SM00304, SM00304, G3DSA:3.30.450.20, G3DSA:3.30.450.20, SM00283, PF02743, PTHR32089:SF59, cd06225, PS50111, Coil, SSF103190, PF00015, PF00672	MCP_signal, Bacterial chemotaxis sensory transducer signature, Bacterial chemotaxis sensory transducer signature, Bacterial chemotaxis sensory transducer signature, HAMP domain profile., Cache domain, HAMP, Bacterial chemotaxis sensory transducers domain profile., Methyl-accepting chemotaxis protein (MCP) signalling domain, HAMP domain	IPR004090, IPR004090, IPR004090, IPR003660, IPR003660, IPR003660, IPR004089, IPR033479, IPR003660, IPR004089, IPR029151, IPR004089, IPR003660	Chemotaxis methyl-accepting receptor, Chemotaxis methyl-accepting receptor, Chemotaxis methyl-accepting receptor, HAMP domain, HAMP domain, HAMP domain, Methyl-accepting chemotaxis protein (MCP) signalling domain, Double Cache domain 1, HAMP domain, Methyl-accepting chemotaxis protein (MCP) signalling domain, Periplasmic sensor-like domain superfamily, Methyl-accepting chemotaxis protein (MCP) si…	GO:0004888, GO:0006935, GO:0007165, GO:0016020, GO:0004888, GO:0006935, GO:0007165, GO:0016020, GO:0004888, GO:0006935, GO:0007165, GO:0016020, GO:0007165, GO:0016021, GO:0007165, GO:0016021, GO:0007165, GO:0016021, GO:0007165, GO:0016020, GO:0007165, GO:0016021, GO:0007165, GO:0016020, GO:0007165, GO:0016020, GO:0007165, GO:0016021
NZ_CP050969.1_191_103	1214065.BAGV01000011_gene3237	5.5e-174	617.5	unclassified Enterobacteriaceae	nuoN	GO:0003674,GO:0003824,GO:0003954,GO:0005575,GO:0005623,GO:0005886,GO:0005887,GO:0006091,GO:0006119,GO:0006120,GO:0006139,GO:0006163,GO:0006725,GO:0006753,GO:0006793,GO:0006796,GO:0006807,GO:0006810,GO:0006811,GO:0006812,GO:0008137,GO:0008150,GO:0008152,GO:0009060,GO:0009117,GO:0009123,GO:0009126,GO:0009141,GO:0009144,GO:0009150,GO:0009161,GO:0009167,GO:0009199,GO:0009205,GO:0009259,GO:0009987,GO:…	1.6.5.3	ko:K00343	ko00190,ko01100,map00190,map01100	M00144	R11945	RC00061	ko00000,ko00001,ko00002,ko01000	3.D.1		iEC042_1314.EC042_2517,iSbBS512_1146.SbBS512_E2652	Bacteria	1MV56@1224,1RPJB@1236,282KI@191675,COG1007@1,COG1007@2	NA|NA|NA	C	NDH-1 shuttles electrons from NADH, via FMN and iron- sulfur (Fe-S) centers, to quinones in the respiratory chain. The immediate electron acceptor for the enzyme in this species is believed to be ubiquinone. Couples the redox reaction to proton translocation (for every two electrons transferred, four hydrogen ions are translocated across the cytoplasmic membrane), and thus conserves the redox ene…	Pfam, TIGRFAM, PANTHER, PANTHER, Hamap	PF00361, TIGR01770, PTHR22773, PTHR22773:SF41, MF_00445	Proton-conducting membrane transporter, NDH_I_N: proton-translocating NADH-quinone oxidoreductase, chain N, NAD(P)H-quinone oxidoreductase subunit 2, chloroplastic [ndhB].	IPR001750, IPR010096, IPR010096	NADH:quinone oxidoreductase/Mrp antiporter, membrane subunit, NAD(P)H-quinone oxidoreductase, subunit N/subunit 2, NAD(P)H-quinone oxidoreductase, subunit N/subunit 2	GO:0008137, GO:0042773, GO:0055114, GO:0008137, GO:0042773, GO:0055114	Reactome: R-HSA-611105|Reactome: R-HSA-6799198, nan]
NZ_CP050969.1_191_104	1332071.L581_3240	2.4e-225	788.1	Serratia	nuoM	GO:0003674,GO:0005488,GO:0005575,GO:0005623,GO:0005886,GO:0005887,GO:0006091,GO:0006810,GO:0006811,GO:0006812,GO:0008150,GO:0008152,GO:0009060,GO:0009987,GO:0015672,GO:0015980,GO:0015988,GO:0015990,GO:0016020,GO:0016021,GO:0030964,GO:0031224,GO:0031226,GO:0032991,GO:0034220,GO:0044237,GO:0044425,GO:0044459,GO:0044464,GO:0045271,GO:0045272,GO:0045333,GO:0048037,GO:0048038,GO:0048039,GO:0051179,GO:…	1.6.5.3	ko:K00342	ko00190,ko01100,map00190,map01100	M00144	R11945	RC00061	ko00000,ko00001,ko00002,ko01000	3.D.1		iSDY_1059.SDY_2473	Bacteria	1MV7V@1224,1RNI4@1236,400ZN@613,COG1008@1,COG1008@2	NA|NA|NA	C	NADH ubiquinone oxidoreductase subunit	Pfam, TIGRFAM, PANTHER, PANTHER, PRINTS, PRINTS, PRINTS, PRINTS, PRINTS	PF00361, TIGR01972, PTHR43507, PTHR43507:SF7, PR01437, PR01437, PR01437, PR01437, PR01437	Proton-conducting membrane transporter, NDH_I_M: proton-translocating NADH-quinone oxidoreductase, chain M, NADH-ubiquinone oxidoreductase subunit 4 signature, NADH-ubiquinone oxidoreductase subunit 4 signature, NADH-ubiquinone oxidoreductase subunit 4 signature, NADH-ubiquinone oxidoreductase subunit 4 signature, NADH-ubiquinone oxidoreductase subunit 4 signature	IPR001750, IPR010227, IPR003918, IPR003918, IPR003918, IPR003918, IPR003918, IPR003918	NADH:quinone oxidoreductase/Mrp antiporter, membrane subunit, NADH-quinone oxidoreductase, chain M/4, NADH:ubiquinone oxidoreductase, NADH:ubiquinone oxidoreductase, NADH:ubiquinone oxidoreductase, NADH:ubiquinone oxidoreductase, NADH:ubiquinone oxidoreductase, NADH:ubiquinone oxidoreductase	GO:0008137, GO:0042773, GO:0055114, GO:0008137, GO:0042773, GO:0055114, GO:0008137, GO:0042773, GO:0055114, GO:0008137, GO:0042773, GO:0055114, GO:0008137, GO:0042773, GO:0055114, GO:0008137, GO:0042773, GO:0055114, GO:0008137, GO:0042773, GO:0055114	Reactome: R-HSA-611105|Reactome: R-HSA-6799198, Reactome: R-HSA-611105|Reactome: R-HSA-6799198, Reactome: R-HSA-611105|Reactome: R-HSA-6799198, Reactome: R-HSA-611105|Reactome: R-HSA-6799198, Reactome: R-HSA-611105|Reactome: R-HSA-6799198, Reactome: R-HSA-611105|Reactome: R-HSA-6799198, Reactome: R-HSA-611105|Reactome: R-HSA-6799198, Reactome: R-HSA-611105|Reactome: R-HSA-6799198
NZ_CP050969.1_191_105	1453496.AT03_14680	3.6e-247	860.9	Gammaproteobacteria	nuoL	GO:0005575,GO:0005623,GO:0005886,GO:0005887,GO:0006810,GO:0006811,GO:0006812,GO:0008150,GO:0015672,GO:0015988,GO:0015990,GO:0016020,GO:0016021,GO:0030964,GO:0031224,GO:0031226,GO:0032991,GO:0034220,GO:0044425,GO:0044459,GO:0044464,GO:0045271,GO:0045272,GO:0051179,GO:0051234,GO:0055085,GO:0070469,GO:0070470,GO:0071944,GO:0098655,GO:0098660,GO:0098662,GO:0098796,GO:0098797,GO:0098803,GO:1902494,GO:…	1.6.5.3	ko:K00341	ko00190,ko01100,map00190,map01100	M00144	R11945	RC00061	ko00000,ko00001,ko00002,ko01000	3.D.1		e_coli_core.b2278,iAF1260.b2278,iBWG_1329.BWG_2052,iECDH10B_1368.ECDH10B_2440,iECDH1ME8569_1439.ECDH1ME8569_2215,iEcDH1_1363.EcDH1_1379,iJN746.PP_4129,iJO1366.b2278,iJR904.b2278,iY75_1357.Y75_RS11945	Bacteria	1MW2M@1224,1RNKN@1236,COG1009@1,COG1009@2	NA|NA|NA	CP	NADH ubiquinone oxidoreductase subunit 5 (Chain L) Multisubunit Na H antiporter, MnhA subunit	Pfam, PRINTS, PRINTS, PRINTS, PRINTS, PRINTS, PRINTS, PRINTS, PANTHER, PRINTS, PRINTS, PRINTS, PRINTS, PANTHER, Pfam, TIGRFAM	PF00361, PR01434, PR01434, PR01434, PR01434, PR01434, PR01434, PR01434, PTHR42829:SF2, PR01435, PR01435, PR01435, PR01435, PTHR42829, PF00662, TIGR01974	Proton-conducting membrane transporter, NADH-ubiquinone oxidoreductase chain 5 signature, NADH-ubiquinone oxidoreductase chain 5 signature, NADH-ubiquinone oxidoreductase chain 5 signature, NADH-ubiquinone oxidoreductase chain 5 signature, NADH-ubiquinone oxidoreductase chain 5 signature, NADH-ubiquinone oxidoreductase chain 5 signature, NADH-ubiquinone oxidoreductase chain 5 signature, NADH-plas…	IPR001750, IPR018393, IPR018393, IPR018393, IPR018393, IPR001516, IPR003945	NADH:quinone oxidoreductase/Mrp antiporter, membrane subunit, NADH-plastoquinone oxidoreductase, chain 5 subgroup, NADH-plastoquinone oxidoreductase, chain 5 subgroup, NADH-plastoquinone oxidoreductase, chain 5 subgroup, NADH-plastoquinone oxidoreductase, chain 5 subgroup, NADH-Ubiquinone oxidoreductase (complex I), chain 5 N-terminal, NADH-plastoquinone oxidoreductase, chain 5	GO:0008137, GO:0042773, GO:0055114, GO:0008137, GO:0042773, GO:0055114, GO:0008137, GO:0042773, GO:0055114, GO:0008137, GO:0042773, GO:0055114, GO:0008137, GO:0042773, GO:0055114	Reactome: R-HSA-611105|Reactome: R-HSA-6799198, Reactome: R-HSA-611105|Reactome: R-HSA-6799198, Reactome: R-HSA-611105|Reactome: R-HSA-6799198
NZ_CP050969.1_191_106	214092.YPO2546	3.1e-34	151	Yersinia	nuoK	GO:0003674,GO:0003824,GO:0003954,GO:0005575,GO:0005623,GO:0005886,GO:0005887,GO:0008137,GO:0008150,GO:0008152,GO:0016020,GO:0016021,GO:0016491,GO:0016651,GO:0016655,GO:0030964,GO:0031224,GO:0031226,GO:0032991,GO:0044425,GO:0044459,GO:0044464,GO:0045271,GO:0045272,GO:0050136,GO:0055114,GO:0070469,GO:0070470,GO:0071944,GO:0098796,GO:0098797,GO:0098803,GO:1902494,GO:1990204	1.6.5.3	ko:K00340	ko00190,ko01100,map00190,map01100	M00144	R11945	RC00061	ko00000,ko00001,ko00002,ko01000	3.D.1		iIT341.HP1270	Bacteria	1RH0S@1224,1S6FN@1236,41G8S@629,COG0713@1,COG0713@2	NA|NA|NA	C	NDH-1 shuttles electrons from NADH, via FMN and iron- sulfur (Fe-S) centers, to quinones in the respiratory chain. The immediate electron acceptor for the enzyme in this species is believed to be ubiquinone. Couples the redox reaction to proton translocation (for every two electrons transferred, four hydrogen ions are translocated across the cytoplasmic membrane), and thus conserves the redox ene…	Pfam, PANTHER, Hamap, PANTHER	PF00420, PTHR11434, MF_01456, PTHR11434:SF4	NADH-ubiquinone/plastoquinone oxidoreductase chain 4L, NAD(P)H-quinone oxidoreductase subunit 4L, chloroplastic [ndhE].	IPR039428, IPR001133, IPR001133	NADH-ubiquinone oxidoreductase chain 4L/Mnh complex subunit C1-like, NADH-ubiquinone oxidoreductase chain 4L/K, NADH-ubiquinone oxidoreductase chain 4L/K	GO:0016651, GO:0042773, GO:0055114, GO:0016651, GO:0042773, GO:0055114
NZ_CP050969.1_191_107	380703.AHA_1774	1.1e-52	213	Aeromonadales	nuoJ	GO:0003674,GO:0003824,GO:0003954,GO:0005575,GO:0005623,GO:0005886,GO:0005887,GO:0008137,GO:0008150,GO:0008152,GO:0016020,GO:0016021,GO:0016491,GO:0016651,GO:0016655,GO:0030964,GO:0031224,GO:0031226,GO:0032991,GO:0044425,GO:0044459,GO:0044464,GO:0045271,GO:0045272,GO:0050136,GO:0055114,GO:0070469,GO:0070470,GO:0071944,GO:0098796,GO:0098797,GO:0098803,GO:1902494,GO:1990204	1.6.5.3	ko:K00339	ko00190,ko01100,map00190,map01100	M00144	R11945	RC00061	ko00000,ko00001,ko00002,ko01000	3.D.1		e_coli_core.b2280,iAF1260.b2280,iAPECO1_1312.APECO1_4285,iB21_1397.B21_02165,iBWG_1329.BWG_2054,iE2348C_1286.E2348C_2420,iEC042_1314.EC042_2521,iEC55989_1330.EC55989_2524,iECABU_c1320.ECABU_c26120,iECBD_1354.ECBD_1381,iECB_1328.ECB_02205,iECDH10B_1368.ECDH10B_2442,iECDH1ME8569_1439.ECDH1ME8569_2217,iECD_1391.ECD_02205,iECED1_1282.ECED1_2744,iECH74115_1262.ECH74115_3419,iECIAI1_1343.ECIAI1_2354,iE…	Bacteria	1MWJV@1224,1S65T@1236,1Y5R5@135624,COG0839@1,COG0839@2	NA|NA|NA	C	Belongs to the complex I subunit 6 family	PANTHER, Pfam, PANTHER, Gene3D	PTHR33269, PF00499, PTHR33269:SF9, G3DSA:1.20.120.1200	NADH-ubiquinone/plastoquinone oxidoreductase chain 6	IPR001457	NADH:ubiquinone/plastoquinone oxidoreductase, chain 6	GO:0008137, GO:0055114	Reactome: R-HSA-611105|Reactome: R-HSA-6799198
NZ_CP050969.1_191_108	743720.Psefu_2308	6e-78	297	Pseudomonas putida group	nuoI	GO:0003674,GO:0005488,GO:0005575,GO:0005623,GO:0005886,GO:0006091,GO:0008150,GO:0008152,GO:0009060,GO:0009987,GO:0015980,GO:0016020,GO:0030964,GO:0032991,GO:0044237,GO:0044425,GO:0044459,GO:0044464,GO:0045271,GO:0045272,GO:0045333,GO:0048037,GO:0051536,GO:0051539,GO:0051540,GO:0055114,GO:0070469,GO:0070470,GO:0071944,GO:0098796,GO:0098797,GO:0098803,GO:1902494,GO:1990204	1.6.5.3	ko:K00338	ko00190,ko01100,map00190,map01100	M00144	R11945	RC00061	ko00000,ko00001,ko00002,ko01000	3.D.1		e_coli_core.b2281,iAF1260.b2281,iAPECO1_1312.APECO1_4284,iB21_1397.B21_02166,iBWG_1329.BWG_2055,iE2348C_1286.E2348C_2421,iEC042_1314.EC042_2522,iEC55989_1330.EC55989_2525,iECABU_c1320.ECABU_c26130,iECBD_1354.ECBD_1380,iECB_1328.ECB_02206,iECDH10B_1368.ECDH10B_2443,iECDH1ME8569_1439.ECDH1ME8569_2218,iECD_1391.ECD_02206,iECED1_1282.ECED1_2745,iECH74115_1262.ECH74115_3420,iECIAI1_1343.ECIAI1_2355,iE…	Bacteria	1MV90@1224,1RN32@1236,1YXN9@136845,COG1143@1,COG1143@2	NA|NA|NA	C	NDH-1 shuttles electrons from NADH, via FMN and iron- sulfur (Fe-S) centers, to quinones in the respiratory chain. The immediate electron acceptor for the enzyme in this species is believed to be ubiquinone. Couples the redox reaction to proton translocation (for every two electrons transferred, four hydrogen ions are translocated across the cytoplasmic membrane), and thus conserves the redox ene…	Hamap, Pfam, PANTHER, PANTHER, ProSitePatterns, ProSiteProfiles, ProSiteProfiles, Gene3D, SUPERFAMILY, TIGRFAM, ProSitePatterns	MF_01351, PF12838, PTHR10849:SF24, PTHR10849, PS00198, PS51379, PS51379, G3DSA:3.30.70.3270, SSF54862, TIGR01971, PS00198	NAD(P)H-quinone oxidoreductase subunit I, chloroplastic [ndhI]., 4Fe-4S dicluster domain, 4Fe-4S ferredoxin-type iron-sulfur binding region signature., 4Fe-4S ferredoxin-type iron-sulfur binding domain profile., 4Fe-4S ferredoxin-type iron-sulfur binding domain profile., NuoI: NADH-quinone oxidoreductase, chain I, 4Fe-4S ferredoxin-type iron-sulfur binding region signature.	IPR010226, IPR017896, IPR010226, IPR017900, IPR017896, IPR017896, IPR010226, IPR017900	NADH-quinone oxidoreductase, chain I, 4Fe-4S ferredoxin-type, iron-sulphur binding domain, NADH-quinone oxidoreductase, chain I, 4Fe-4S ferredoxin, iron-sulphur binding, conserved site, 4Fe-4S ferredoxin-type, iron-sulphur binding domain, 4Fe-4S ferredoxin-type, iron-sulphur binding domain, NADH-quinone oxidoreductase, chain I, 4Fe-4S ferredoxin, iron-sulphur binding, conserved site	GO:0016020, GO:0016651, GO:0051539, GO:0055114, GO:0016020, GO:0016651, GO:0051539, GO:0055114, GO:0016020, GO:0016651, GO:0051539, GO:0055114	Reactome: R-HSA-611105|Reactome: R-HSA-6799198, Reactome: R-HSA-611105|Reactome: R-HSA-6799198, Reactome: R-HSA-611105|Reactome: R-HSA-6799198
NZ_CP050969.1_191_109	1207076.ALAT01000147_gene447	2.8e-150	538.1	Pseudomonas stutzeri group	nuoH	GO:0003674,GO:0003824,GO:0003954,GO:0005575,GO:0005623,GO:0005886,GO:0005887,GO:0006091,GO:0008150,GO:0008152,GO:0009060,GO:0009987,GO:0015980,GO:0016020,GO:0016021,GO:0016491,GO:0016651,GO:0016655,GO:0030964,GO:0031224,GO:0031226,GO:0032991,GO:0044237,GO:0044425,GO:0044459,GO:0044464,GO:0045271,GO:0045272,GO:0045333,GO:0050136,GO:0055114,GO:0070469,GO:0070470,GO:0071944,GO:0098796,GO:0098797,GO:…	1.6.5.3	ko:K00337	ko00190,ko01100,map00190,map01100	M00144	R11945	RC00061	ko00000,ko00001,ko00002,ko01000	3.D.1			Bacteria	1MU2R@1224,1RQE9@1236,1Z1UX@136846,COG1005@1,COG1005@2	NA|NA|NA	C	NDH-1 shuttles electrons from NADH, via FMN and iron- sulfur (Fe-S) centers, to quinones in the respiratory chain. The immediate electron acceptor for the enzyme in this species is believed to be ubiquinone. Couples the redox reaction to proton translocation (for every two electrons transferred, four hydrogen ions are translocated across the cytoplasmic membrane), and thus conserves the redox ene…	ProSitePatterns, PANTHER, ProSitePatterns, Hamap, Pfam, PANTHER	PS00668, PTHR11432, PS00667, MF_01350, PF00146, PTHR11432:SF12	Respiratory-chain NADH dehydrogenase subunit 1 signature 2., Respiratory-chain NADH dehydrogenase subunit 1 signature 1., NAD(P)H-quinone oxidoreductase subunit 1, chloroplastic [ndhA]., NADH dehydrogenase	IPR018086, IPR001694, IPR018086, IPR001694, IPR001694	NADH:ubiquinone oxidoreductase, subunit 1, conserved site, NADH:ubiquinone oxidoreductase, subunit 1/F420H2 oxidoreductase subunit H, NADH:ubiquinone oxidoreductase, subunit 1, conserved site, NADH:ubiquinone oxidoreductase, subunit 1/F420H2 oxidoreductase subunit H, NADH:ubiquinone oxidoreductase, subunit 1/F420H2 oxidoreductase subunit H	GO:0016020, GO:0055114, GO:0016020, GO:0055114, GO:0016020, GO:0055114, GO:0016020, GO:0055114, GO:0016020, GO:0055114	Reactome: R-HSA-611105|Reactome: R-HSA-6799198, Reactome: R-HSA-611105|Reactome: R-HSA-6799198, Reactome: R-HSA-611105|Reactome: R-HSA-6799198, Reactome: R-HSA-611105|Reactome: R-HSA-6799198, Reactome: R-HSA-611105|Reactome: R-HSA-6799198
NZ_CP050969.1_191_11	1001530.BACE01000011_gene2181	2.9e-81	308.1	Vibrionales	lacA		2.3.1.18,2.3.1.79	ko:K00633,ko:K00661					ko00000,ko01000				Bacteria	1RA2T@1224,1S3ZZ@1236,1XUHN@135623,COG0110@1,COG0110@2	NA|NA|NA	S	COG0110 Acetyltransferase (isoleucine patch superfamily)	SUPERFAMILY, Gene3D, PANTHER, PANTHER, CDD, SMART, Pfam, Pfam	SSF51161, G3DSA:2.160.10.10, PTHR23416, PTHR23416:SF23, cd03357, SM01266, PF00132, PF12464	LbH_MAT_GAT, Bacterial transferase hexapeptide (six repeats), Maltose acetyltransferase	IPR011004,IPR024688, IPR001451, IPR024688	Trimeric LpxA-like superfamily,Maltose/galactoside acetyltransferase, Hexapeptide repeat, Maltose/galactoside acetyltransferase	GO:0016407, GO:0016407
NZ_CP050969.1_191_110	1440052.EAKF1_ch3698	0	1152.5	Escherichia	nuoG	GO:0003674,GO:0003824,GO:0003954,GO:0005488,GO:0005575,GO:0005623,GO:0005886,GO:0006091,GO:0006119,GO:0006120,GO:0006139,GO:0006163,GO:0006725,GO:0006753,GO:0006793,GO:0006796,GO:0006807,GO:0008137,GO:0008150,GO:0008152,GO:0009060,GO:0009117,GO:0009123,GO:0009126,GO:0009141,GO:0009144,GO:0009150,GO:0009161,GO:0009167,GO:0009199,GO:0009205,GO:0009259,GO:0009987,GO:0015980,GO:0016020,GO:0016310,GO:…	1.6.5.3	ko:K00336	ko00190,ko01100,map00190,map01100	M00144	R11945	RC00061	ko00000,ko00001,ko00002,ko01000	3.D.1		iECs_1301.ECs3167,iG2583_1286.G2583_2820,iZ_1308.Z3542	Bacteria	1P8MN@1224,1RMUH@1236,3XM7D@561,COG1034@1,COG1034@2	NA|NA|NA	C	NDH-1 shuttles electrons from NADH, via FMN and iron- sulfur (Fe-S) centers, to quinones in the respiratory chain. The immediate electron acceptor for the enzyme in this species is believed to be ubiquinone. Couples the redox reaction to proton translocation (for every two electrons transferred, four hydrogen ions are translocated across the cytoplasmic membrane), and thus conserves the redox ene…	Gene3D, Pfam, ProSiteProfiles, ProSiteProfiles, SMART, Pfam, CDD, ProSitePatterns, ProSitePatterns, SUPERFAMILY, Gene3D, Pfam, TIGRFAM, ProSitePatterns, PANTHER, SUPERFAMILY, ProSiteProfiles, Gene3D, CDD, Pfam, SMART, CDD, SUPERFAMILY, SUPERFAMILY, PANTHER	G3DSA:2.20.25.90, PF10588, PS51085, PS51839, SM00929, PF13510, cd00207, PS00642, PS00643, SSF54862, G3DSA:3.40.50.740, PF04879, TIGR01973, PS00641, PTHR11615:SF216, SSF50692, PS51669, G3DSA:3.10.20.740, cd02788, PF00384, SM00926, cd02771, SSF53706, SSF54292, PTHR11615	NADH-ubiquinone oxidoreductase-G iron-sulfur binding region, 2Fe-2S ferredoxin-type iron-sulfur binding domain profile., His(Cys)3-ligated-type [4Fe-4S] domain profile., 2Fe-2S iron-sulfur cluster binding domain, fer2, Respiratory-chain NADH dehydrogenase 75 Kd subunit signature 2., Respiratory-chain NADH dehydrogenase 75 Kd subunit signature 3., Molybdopterin oxidoreductase Fe4S4 domain, NuoG: N…	IPR019574, IPR001041, IPR019574, IPR019574, IPR001041, IPR000283, IPR000283, IPR006963, IPR010228, IPR000283, IPR009010, IPR006963, IPR006656, IPR006963, IPR036010	NADH:ubiquinone oxidoreductase, subunit G, iron-sulphur binding, 2Fe-2S ferredoxin-type iron-sulfur binding domain, NADH:ubiquinone oxidoreductase, subunit G, iron-sulphur binding, NADH:ubiquinone oxidoreductase, subunit G, iron-sulphur binding, 2Fe-2S ferredoxin-type iron-sulfur binding domain, NADH:ubiquinone oxidoreductase, 75kDa subunit, conserved site, NADH:ubiquinone oxidoreductase, 75kDa s…	GO:0016491, GO:0055114, GO:0009055, GO:0051536, GO:0016491, GO:0055114, GO:0016491, GO:0055114, GO:0009055, GO:0051536, GO:0008137, GO:0016020, GO:0042773, GO:0055114, GO:0008137, GO:0016020, GO:0042773, GO:0055114, GO:0016491, GO:0055114, GO:0016651, GO:0051536, GO:0055114, GO:0008137, GO:0016020, GO:0042773, GO:0055114, GO:0016491, GO:0055114, GO:0016491, GO:0055114, GO:0016491, GO:0055114, GO:…	Reactome: R-HSA-611105|Reactome: R-HSA-6799198, Reactome: R-HSA-611105|Reactome: R-HSA-6799198, Reactome: R-HSA-611105|Reactome: R-HSA-6799198, Reactome: R-HSA-611105|Reactome: R-HSA-6799198, Reactome: R-HSA-611105|Reactome: R-HSA-6799198, Reactome: R-HSA-611105|Reactome: R-HSA-6799198, Reactome: R-HSA-611105|Reactome: R-HSA-6799198, Reactome: R-HSA-611105|Reactome: R-HSA-6799198, Reactome: R-HSA…
NZ_CP050969.1_191_111	1214065.BAGV01000011_gene3229	6.5e-214	750	unclassified Enterobacteriaceae	nuoF	GO:0000166,GO:0003674,GO:0005488,GO:0005575,GO:0005623,GO:0005886,GO:0006091,GO:0008150,GO:0008152,GO:0009060,GO:0009987,GO:0010181,GO:0015980,GO:0016020,GO:0030964,GO:0032553,GO:0032991,GO:0036094,GO:0043167,GO:0043168,GO:0044237,GO:0044425,GO:0044459,GO:0044464,GO:0045271,GO:0045272,GO:0045333,GO:0048037,GO:0050662,GO:0051287,GO:0051536,GO:0051539,GO:0051540,GO:0055114,GO:0070469,GO:0070470,GO:…	1.6.5.3	ko:K00335	ko00190,ko01100,map00190,map01100	M00144	R11945	RC00061	ko00000,ko00001,ko00002,ko01000	3.D.1			Bacteria	1MV8F@1224,1RMUD@1236,282HY@191675,COG1894@1,COG1894@2	NA|NA|NA	C	NDH-1 shuttles electrons from NADH, via FMN and iron- sulfur (Fe-S) centers, to quinones in the respiratory chain	SUPERFAMILY, Coils, ProSitePatterns, Pfam, SUPERFAMILY, ProSitePatterns, Gene3D, Pfam, Gene3D, SMART, SUPERFAMILY, PANTHER, TIGRFAM, Gene3D, Pfam	SSF142984, Coil, PS00644, PF10531, SSF142019, PS00645, G3DSA:1.20.1440.230, PF10589, G3DSA:3.40.50.11540, SM00928, SSF140490, PTHR43578, TIGR01959, G3DSA:3.10.20.600, PF01512	Respiratory-chain NADH dehydrogenase 51 Kd subunit signature 1., SLBB domain, Respiratory-chain NADH dehydrogenase 51 Kd subunit signature 2., NADH-ubiquinone oxidoreductase-F iron-sulfur binding region,nuoF_fam: NADH oxidoreductase (quinone), F subunit, Respiratory-chain NADH dehydrogenase 51 Kd subunit	IPR001949, IPR019554, IPR037225, IPR001949, IPR037207, IPR019575, IPR037225, IPR019575, IPR037207, IPR011537, IPR011538	NADH:ubiquinone oxidoreductase, 51kDa subunit, conserved site, Soluble ligand binding domain, NADH-ubiquinone oxidoreductase 51kDa subunit, FMN-binding domain superfamily, NADH:ubiquinone oxidoreductase, 51kDa subunit, conserved site, NADH-ubiquinone oxidoreductase 51kDa subunit, iron-sulphur binding domain superfamily, NADH-ubiquinone oxidoreductase 51kDa subunit, iron-sulphur binding domain, NA…	GO:0008137, GO:0010181, GO:0051539, GO:0055114, GO:0008137, GO:0010181, GO:0051539, GO:0055114, GO:0051539, GO:0051539, GO:0010181, GO:0016651, GO:0051287, GO:0051539, GO:0055114	Reactome: R-HSA-611105|Reactome: R-HSA-6799198, Reactome: R-HSA-611105|Reactome: R-HSA-6799198, Reactome: R-HSA-611105|Reactome: R-HSA-6799198, Reactome: R-HSA-611105|Reactome: R-HSA-6799198, Reactome: R-HSA-611105|Reactome: R-HSA-6799198, Reactome: R-HSA-611105|Reactome: R-HSA-6799198, Reactome: R-HSA-611105|Reactome: R-HSA-6799198, Reactome: R-HSA-611105|Reactome: R-HSA-6799198, Reactome: R-HSA…
NZ_CP050969.1_191_112	595494.Tola_2643	3e-63	248.1	Aeromonadales	nuoE	GO:0003674,GO:0003824,GO:0003954,GO:0005488,GO:0005575,GO:0005623,GO:0005886,GO:0006091,GO:0008137,GO:0008150,GO:0008152,GO:0009987,GO:0015980,GO:0016020,GO:0016491,GO:0016651,GO:0016655,GO:0022900,GO:0022904,GO:0030964,GO:0032991,GO:0044237,GO:0044425,GO:0044459,GO:0044464,GO:0045271,GO:0045272,GO:0045333,GO:0048037,GO:0050136,GO:0051536,GO:0051537,GO:0051540,GO:0055114,GO:0070469,GO:0070470,GO:…	1.6.5.3	ko:K00334	ko00190,ko01100,map00190,map01100	M00144	R11945	RC00061	ko00000,ko00001,ko00002,ko01000	3.D.1		iYL1228.KPN_02675	Bacteria	1MWS2@1224,1RN4C@1236,1Y4T8@135624,COG1905@1,COG1905@2	NA|NA|NA	C	Thioredoxin-like [2Fe-2S] ferredoxin	Gene3D, Gene3D, Pfam, PANTHER, SUPERFAMILY, PIRSF, TIGRFAM, CDD, PANTHER	G3DSA:3.40.30.10, G3DSA:1.10.10.1590, PF01257, PTHR10371:SF3, SSF52833, PIRSF000216, TIGR01958, cd03064, PTHR10371	Thioredoxin-like [2Fe-2S] ferredoxin, nuoE_fam: NADH-quinone oxidoreductase, E subunit, TRX_Fd_NuoE	IPR036249, IPR002023, IPR002023, IPR002023, IPR002023	Thioredoxin-like superfamily, NADH-quinone oxidoreductase subunit E-like, NADH-quinone oxidoreductase subunit E-like, NADH-quinone oxidoreductase subunit E-like, NADH-quinone oxidoreductase subunit E-like	GO:0016491, GO:0055114, GO:0016491, GO:0055114, GO:0016491, GO:0055114, GO:0016491, GO:0055114	Reactome: R-HSA-611105|Reactome: R-HSA-6799198, Reactome: R-HSA-611105|Reactome: R-HSA-6799198, Reactome: R-HSA-611105|Reactome: R-HSA-6799198, Reactome: R-HSA-611105|Reactome: R-HSA-6799198
NZ_CP050969.1_191_113	211586.SO_1019	2.2e-289	1001.1	Shewanellaceae	nuoC	GO:0003674,GO:0003824,GO:0003954,GO:0005575,GO:0005623,GO:0005886,GO:0006091,GO:0006119,GO:0006120,GO:0006139,GO:0006163,GO:0006725,GO:0006753,GO:0006793,GO:0006796,GO:0006807,GO:0008137,GO:0008150,GO:0008152,GO:0009117,GO:0009123,GO:0009126,GO:0009141,GO:0009144,GO:0009150,GO:0009161,GO:0009167,GO:0009199,GO:0009205,GO:0009259,GO:0009987,GO:0015980,GO:0016020,GO:0016310,GO:0016491,GO:0016651,GO:…	1.6.5.3	ko:K00332,ko:K00333,ko:K13378,ko:K13380	ko00190,ko01100,map00190,map01100	M00144	R11945	RC00061	ko00000,ko00001,ko00002,ko01000	3.D.1		iECDH10B_1368.ECDH10B_2448,iECDH1ME8569_1439.ECDH1ME8569_2223,iETEC_1333.ETEC_2421,iEcDH1_1363.EcDH1_1371,iPC815.YPO2553,iUMNK88_1353.UMNK88_2836	Bacteria	1MVIN@1224,1RM98@1236,2QBAX@267890,COG0649@1,COG0649@2,COG0852@1,COG0852@2	NA|NA|NA	C	NDH-1 shuttles electrons from NADH, via FMN and iron- sulfur (Fe-S) centers, to quinones in the respiratory chain. The immediate electron acceptor for the enzyme in this species is believed to be ubiquinone. Couples the redox reaction to proton translocation (for every two electrons transferred, four hydrogen ions are translocated across the cytoplasmic membrane), and thus conserves the redox ene…	Gene3D, TIGRFAM, Hamap, SUPERFAMILY, Pfam, Hamap, ProDom, Pfam, TIGRFAM, PANTHER, Gene3D, Hamap, SUPERFAMILY, ProSitePatterns, PANTHER	G3DSA:3.30.460.80, TIGR01962, MF_01357, SSF143243, PF00346, MF_01359, PD001581, PF00329, TIGR01961, PTHR11993, G3DSA:1.10.645.20, MF_01358, SSF56762, PS00535, PTHR11993:SF36	NuoD: NADH dehydrogenase (quinone), D subunit, NAD(P)H-quinone oxidoreductase subunit J, chloroplastic [ndhJ]., Respiratory-chain NADH dehydrogenase, 49 Kd subunit, NADH-quinone oxidoreductase subunit C/D [nuoC]., OXIDOREDUCTASE SUBUNIT NADH DEHYDROGENASE CHAIN C NAD DEHYDROGENASE UBIQUINONE F420H2, Respiratory-chain NADH dehydrogenase, 30 Kd subunit, NuoC_fam: NADH (or F420H2) dehydrogenase, sub…	IPR037232, IPR022885, IPR010218, IPR037232, IPR001135, IPR023062, IPR001268, IPR001268, IPR010218, IPR038290, IPR022885, IPR029014, IPR014029	NADH:ubiquinone oxidoreductase, 30kDa subunit superfamily, NAD(P)H-quinone oxidoreductase subunit D/H, NADH dehydrogenase, subunit C, NADH:ubiquinone oxidoreductase, 30kDa subunit superfamily, NADH-quinone oxidoreductase, subunit D, NADH dehydrogenase, subunit CD, NADH:ubiquinone oxidoreductase, 30kDa subunit, NADH:ubiquinone oxidoreductase, 30kDa subunit, NADH dehydrogenase, subunit C, NADH-quin…	GO:0016651, GO:0055114, GO:0016651, GO:0055114, GO:0016651, GO:0048038, GO:0051287, GO:0055114, GO:0030964, GO:0050136, GO:0055114, GO:0008137, GO:0055114, GO:0008137, GO:0055114, GO:0016651, GO:0055114, GO:0016651, GO:0055114, GO:0016651, GO:0055114	Reactome: R-HSA-611105|Reactome: R-HSA-6799198, Reactome: R-HSA-611105|Reactome: R-HSA-6799198, Reactome: R-HSA-611105|Reactome: R-HSA-6799198, Reactome: R-HSA-611105|Reactome: R-HSA-6799198, Reactome: R-HSA-611105|Reactome: R-HSA-6799198, KEGG: 00190+1.6.5.11, Reactome: R-HSA-611105|Reactome: R-HSA-6799198, Reactome: R-HSA-611105|Reactome: R-HSA-6799198, Reactome: R-HSA-611105|Reactome: R-HSA-67…
NZ_CP050969.1_191_114	287.DR97_5324	2.6e-110	404.8	Pseudomonas aeruginosa group	nuoB	GO:0003674,GO:0003824,GO:0003954,GO:0005488,GO:0005575,GO:0005623,GO:0005886,GO:0006091,GO:0006119,GO:0006120,GO:0006139,GO:0006163,GO:0006725,GO:0006753,GO:0006793,GO:0006796,GO:0006807,GO:0006810,GO:0006811,GO:0006812,GO:0008137,GO:0008150,GO:0008152,GO:0009060,GO:0009117,GO:0009123,GO:0009126,GO:0009141,GO:0009144,GO:0009150,GO:0009161,GO:0009167,GO:0009199,GO:0009205,GO:0009259,GO:0009987,GO:…	1.6.5.3	ko:K00331,ko:K13380	ko00190,ko01100,map00190,map01100	M00144	R11945	RC00061	ko00000,ko00001,ko00002,ko01000	3.D.1		iYL1228.KPN_02677	Bacteria	1MUI2@1224,1RP4R@1236,1YESW@136841,COG0377@1,COG0377@2	NA|NA|NA	C	NDH-1 shuttles electrons from NADH, via FMN and iron- sulfur (Fe-S) centers, to quinones in the respiratory chain. The immediate electron acceptor for the enzyme in this species is believed to be ubiquinone. Couples the redox reaction to proton translocation (for every two electrons transferred, four hydrogen ions are translocated across the cytoplasmic membrane), and thus conserves the redox ene…	Gene3D, Hamap, PANTHER, PANTHER, ProSitePatterns, SUPERFAMILY, Pfam, TIGRFAM	G3DSA:3.40.50.12280, MF_01356, PTHR11995, PTHR11995:SF14, PS01150, SSF56770, PF01058, TIGR01957	NAD(P)H-quinone oxidoreductase subunit K, chloroplastic [ndhK]., Respiratory-chain NADH dehydrogenase 20 Kd subunit signature., NADH ubiquinone oxidoreductase, 20 Kd subunit, nuoB_fam: NADH-quinone oxidoreductase, B subunit	IPR006138, IPR006138, IPR006137, IPR006138	NADH-ubiquinone oxidoreductase, 20 Kd subunit, NADH-ubiquinone oxidoreductase, 20 Kd subunit, NADH:ubiquinone oxidoreductase-like, 20kDa subunit, NADH-ubiquinone oxidoreductase, 20 Kd subunit	GO:0008137, GO:0048038, GO:0051539, GO:0055114, GO:0008137, GO:0048038, GO:0051539, GO:0055114, GO:0051536, GO:0055114, GO:0008137, GO:0048038, GO:0051539, GO:0055114	Reactome: R-HSA-611105|Reactome: R-HSA-6799198, Reactome: R-HSA-611105|Reactome: R-HSA-6799198, Reactome: R-HSA-611105|Reactome: R-HSA-6799198, Reactome: R-HSA-611105|Reactome: R-HSA-6799198
NZ_CP050969.1_191_115	998088.B565_2345	1.9e-47	195.3	Aeromonadales	nuoA	GO:0003674,GO:0003824,GO:0003954,GO:0005575,GO:0008137,GO:0008150,GO:0008152,GO:0016020,GO:0016491,GO:0016651,GO:0016655,GO:0030964,GO:0032991,GO:0044425,GO:0050136,GO:0055114,GO:0098796,GO:1902494	1.6.5.3	ko:K00330	ko00190,ko01100,map00190,map01100	M00144	R11945	RC00061	ko00000,ko00001,ko00002,ko01000	3.D.1			Bacteria	1RGUT@1224,1S644@1236,1Y5TM@135624,COG0838@1,COG0838@2	NA|NA|NA	C	NDH-1 shuttles electrons from NADH, via FMN and iron- sulfur (Fe-S) centers, to quinones in the respiratory chain. The immediate electron acceptor for the enzyme in this species is believed to be ubiquinone. Couples the redox reaction to proton translocation (for every two electrons transferred, four hydrogen ions are translocated across the cytoplasmic membrane), and thus conserves the redox ene…	Gene3D, Pfam, PANTHER, PANTHER, Hamap	G3DSA:1.20.58.1610, PF00507, PTHR11058, PTHR11058:SF9, MF_01394	NADH-ubiquinone/plastoquinone oxidoreductase, chain 3, NAD(P)H-quinone oxidoreductase subunit 3, chloroplastic [ndhC].	IPR038430, IPR000440, IPR000440, IPR023043	NADH:ubiquinone oxidoreductase, subunit 3 superfamily, NADH:ubiquinone/plastoquinone oxidoreductase, chain 3, NADH:ubiquinone/plastoquinone oxidoreductase, chain 3, NAD(P)H-quinone oxidoreductase subunit 3, bacterial/plastid	GO:0008137, GO:0055114, GO:0008137, GO:0055114, GO:0016651, GO:0055114	Reactome: R-HSA-611105|Reactome: R-HSA-6799198, Reactome: R-HSA-611105|Reactome: R-HSA-6799198, Reactome: R-HSA-611105|Reactome: R-HSA-6799198
NZ_CP050969.1_191_116	1111728.ATYS01000008_gene1391	8.1e-42	177.2	Gammaproteobacteria	sxy	GO:0006355,GO:0006810,GO:0007154,GO:0008150,GO:0009290,GO:0009292,GO:0009294,GO:0009605,GO:0009889,GO:0009987,GO:0009991,GO:0010468,GO:0010556,GO:0015931,GO:0019219,GO:0019222,GO:0030420,GO:0031323,GO:0031326,GO:0031344,GO:0031346,GO:0031668,GO:0044087,GO:0044089,GO:0044093,GO:0044764,GO:0048518,GO:0048522,GO:0050657,GO:0050789,GO:0050794,GO:0050896,GO:0051027,GO:0051090,GO:0051091,GO:0051128,GO:…		ko:K07343					ko00000				Bacteria	1RDWD@1224,1S496@1236,COG3070@1,COG3070@2	NA|NA|NA	K	regulator of competence-specific genes	Pfam, Gene3D, Gene3D, Pfam, PIRSF, PANTHER, SUPERFAMILY	PF04993, G3DSA:3.30.1460.30, G3DSA:1.10.150.20, PF04994, PIRSF028788, PTHR36121, SSF159894	TfoX N-terminal domain, TfoX C-terminal domain	IPR007076, IPR007077, IPR026256	TfoX, N-terminal, TfoX, C-terminal, Transcriptional regulator, TfoX/Sxy-type
NZ_CP050969.1_191_117	1524467.IV04_05575	1.7e-07	60.8	Serratia	ompA	GO:0000746,GO:0003674,GO:0005215,GO:0005488,GO:0005515,GO:0005575,GO:0005623,GO:0005886,GO:0006810,GO:0006811,GO:0006950,GO:0006974,GO:0008150,GO:0009279,GO:0009597,GO:0009605,GO:0009607,GO:0009615,GO:0009987,GO:0015267,GO:0015288,GO:0016020,GO:0016021,GO:0016032,GO:0019058,GO:0019867,GO:0022803,GO:0022829,GO:0022857,GO:0030260,GO:0030312,GO:0030313,GO:0031224,GO:0031975,GO:0032991,GO:0033554,GO:…		ko:K03286,ko:K03640					ko00000,ko02000	1.B.6,2.C.1.2		iECIAI1_1343.ECIAI1_0998,iECNA114_1301.ECNA114_1035,iECSF_1327.ECSF_0871,iUTI89_1310.UTI89_C1022	Bacteria	1N6EM@1224,1RMJ7@1236,401T0@613,COG2885@1,COG2885@2,COG3637@1,COG3637@2	NA|NA|NA	M	OmpA is believed to be a porin, involved in diffusion of nonspecific small solutes across the outer membrane. It is the most abundant integral protein of the outer membrane of E. coli, and it is known to play a role as a phage receptor, a mediator of F-factor dependent conjugation, and in maintaining the structural shape of the outer membrane	PANTHER, PANTHER, Gene3D	PTHR30128, PTHR30128:SF30, G3DSA:2.40.160.20
NZ_CP050969.1_191_12	380703.AHA_0382	9.3e-108	397.5	Aeromonadales													Bacteria	1MVKA@1224,1SYN2@1236,1Y5A2@135624,COG2200@1,COG2200@2	NA|NA|NA	T	Putative diguanylate phosphodiesterase	PANTHER, PANTHER, ProSiteProfiles, SMART, CDD, Pfam, SUPERFAMILY, Gene3D	PTHR33121:SF27, PTHR33121, PS50883, SM00052, cd01948, PF00563, SSF141868, G3DSA:3.20.20.450	EAL domain profile., EAL, EAL domain	IPR001633, IPR001633, IPR001633, IPR001633, IPR035919, IPR035919	EAL domain, EAL domain, EAL domain, EAL domain, EAL domain superfamily, EAL domain superfamily
NZ_CP050969.1_191_13	1166130.H650_24635	2e-122	445.7	Enterobacter	nagZ	GO:0000270,GO:0003674,GO:0003824,GO:0004553,GO:0004563,GO:0005575,GO:0005622,GO:0005623,GO:0005737,GO:0005829,GO:0006022,GO:0006807,GO:0008150,GO:0008152,GO:0009254,GO:0009273,GO:0009987,GO:0015929,GO:0016787,GO:0016798,GO:0030203,GO:0042546,GO:0043170,GO:0044085,GO:0044424,GO:0044444,GO:0044464,GO:0071554,GO:0071704,GO:0071840,GO:1901135,GO:1901564	2.7.8.7,3.2.1.21,3.2.1.52	ko:K00997,ko:K01207,ko:K05349	ko00460,ko00500,ko00520,ko00531,ko00770,ko00940,ko01100,ko01110,ko01501,map00460,map00500,map00520,map00531,map00770,map00940,map01100,map01110,map01501	M00628	R00022,R00026,R01625,R02558,R02887,R02985,R03527,R04949,R04998,R05963,R07809,R07810,R10035,R10039,R10040,R10831	RC00002,RC00049,RC00059,RC00171,RC00262,RC00397,RC00451,RC00714,RC00746,RC01248	ko00000,ko00001,ko00002,ko01000		GH3	iSFV_1184.SFV_1127,iUMN146_1321.UM146_11790	Bacteria	1MVAJ@1224,1RMQF@1236,3X04Z@547,COG1472@1,COG1472@2	NA|NA|NA	M	Plays a role in peptidoglycan recycling by cleaving the terminal beta-1,4-linked N-acetylglucosamine (GlcNAc) from peptide-linked peptidoglycan fragments, giving rise to free GlcNAc, anhydro-N-acetylmuramic acid and anhydro-N-acetylmuramic acid-linked peptides	PANTHER, Gene3D, Pfam, SUPERFAMILY, Hamap, PANTHER, ProSitePatterns	PTHR30480, G3DSA:3.20.20.300, PF00933, SSF51445, MF_00364, PTHR30480:SF7, PS00775	Glycosyl hydrolase family 3 N terminal domain, Beta-hexosaminidase [nagZ]., Glycosyl hydrolases family 3 active site.	IPR036962, IPR001764, IPR017853, IPR022956, IPR019800	Glycoside hydrolase, family 3, N-terminal domain superfamily, Glycoside hydrolase, family 3, N-terminal, Glycoside hydrolase superfamily, Beta-hexosaminidase, bacterial, Glycoside hydrolase, family 3, active site	GO:0004553, GO:0005975, GO:0004553, GO:0005975, GO:0004563, GO:0004553, GO:0005975	KEGG: 00511+3.2.1.52|KEGG: 00513+3.2.1.52|KEGG: 00520+3.2.1.52|KEGG: 00531+3.2.1.52|KEGG: 00603+3.2.1.52|KEGG: 00604+3.2.1.52|MetaCyc: PWY-6902|MetaCyc: PWY-7822|MetaCyc: PWY-7883
NZ_CP050969.1_191_14	399741.Spro_1923	4e-29	135.6	Serratia	thiK	GO:0003674,GO:0003824,GO:0006793,GO:0006796,GO:0008150,GO:0008152,GO:0009987,GO:0016301,GO:0016310,GO:0016740,GO:0016772,GO:0016773,GO:0019165,GO:0044237	2.7.1.89	ko:K07251	ko00730,ko01100,map00730,map01100		R02134	RC00002,RC00017	ko00000,ko00001,ko01000			iE2348C_1286.E2348C_1198,iEC042_1314.EC042_1176,iECED1_1282.ECED1_1249,iECO111_1330.ECO111_1383,iECO26_1355.ECO26_1439,iECUMN_1333.ECUMN_1284	Bacteria	1MURU@1224,1RNUN@1236,400QQ@613,COG0510@1,COG0510@2	NA|NA|NA	H	Catalyzes the phosphorylation of thiamine to thiamine phosphate	Pfam, Gene3D, SUPERFAMILY	PF01636, G3DSA:3.90.1200.10, SSF56112	Phosphotransferase enzyme family	IPR002575, IPR011009	Aminoglycoside phosphotransferase, Protein kinase-like domain superfamily
NZ_CP050969.1_191_15	298386.PBPRA2401	1.6e-07	62.8	Vibrionales	ycfL	GO:0006950,GO:0006974,GO:0008150,GO:0009987,GO:0033554,GO:0050896,GO:0051716											Bacteria	1NHHI@1224,1SH4I@1236,1Y31H@135623,COG5633@1,COG5633@2	NA|NA|NA	S	Protein of unknown function (DUF1425)	Gene3D, Pfam, CDD, ProSiteProfiles	G3DSA:2.60.40.3230, PF07233, cd09030, PS51257	Protein of unknown function (DUF1425), DUF1425, Prokaryotic membrane lipoprotein lipid attachment site profile.	IPR038483, IPR010824, IPR010824	YcfL-like superfamily, Protein of unknown function DUF1425, Protein of unknown function DUF1425
NZ_CP050969.1_191_16	1399774.JDWH01000013_gene747	1.2e-50	205.7	Enterobacter	hinT	GO:0003674,GO:0003824,GO:0005575,GO:0005622,GO:0005623,GO:0005737,GO:0005829,GO:0006082,GO:0006520,GO:0006522,GO:0006524,GO:0006807,GO:0008150,GO:0008152,GO:0009056,GO:0009063,GO:0009078,GO:0009080,GO:0009987,GO:0016054,GO:0016787,GO:0016810,GO:0016811,GO:0019478,GO:0019752,GO:0043436,GO:0043530,GO:0044237,GO:0044238,GO:0044248,GO:0044281,GO:0044282,GO:0044424,GO:0044444,GO:0044464,GO:0046144,GO:…		ko:K02503					ko00000,ko04147				Bacteria	1RDCJ@1224,1S3QE@1236,3X2CP@547,COG0537@1,COG0537@2	NA|NA|NA	FG	PFAM Histidine triad (HIT) protein	PRINTS, PRINTS, PRINTS, ProSitePatterns, CDD, Gene3D, SUPERFAMILY, PANTHER, ProSiteProfiles, PANTHER, Pfam	PR00332, PR00332, PR00332, PS00892, cd01276, G3DSA:3.30.428.10, SSF54197, PTHR23089:SF32, PS51084, PTHR23089, PF01230	Histidine triad family signature, Histidine triad family signature, Histidine triad family signature, HIT domain signature., PKCI_related, HIT domain profile., HIT domain	IPR001310, IPR001310, IPR001310, IPR019808, IPR036265, IPR036265, IPR011146, IPR001310, IPR001310	Histidine triad (HIT) protein, Histidine triad (HIT) protein, Histidine triad (HIT) protein, Histidine triad, conserved site, HIT-like superfamily, HIT-like superfamily, HIT-like domain, Histidine triad (HIT) protein, Histidine triad (HIT) protein	GO:0003824
NZ_CP050969.1_191_17	1248232.BANQ01000065_gene2145	4.8e-128	465.3	Vibrionales				ko:K03406	ko02020,ko02030,map02020,map02030				ko00000,ko00001,ko02035				Bacteria	1MU9B@1224,1RQ69@1236,1XSI1@135623,COG0840@1,COG0840@2	NA|NA|NA	NT	methyl-accepting chemotaxis protein	ProSiteProfiles, SMART, ProSiteProfiles, PANTHER, PANTHER, Gene3D, Pfam, Coils, CDD, CDD, Pfam, SUPERFAMILY, Coils, SMART	PS50885, SM00283, PS50111, PTHR32089:SF70, PTHR32089, G3DSA:1.10.287.950, PF00015, Coil, cd11386, cd06225, PF00672, SSF58104, Coil, SM00304	HAMP domain profile., Bacterial chemotaxis sensory transducers domain profile., Methyl-accepting chemotaxis protein (MCP) signalling domain, MCP_signal, HAMP, HAMP domain	IPR003660, IPR004089, IPR004089, IPR004089, IPR003660, IPR003660, IPR003660	HAMP domain, Methyl-accepting chemotaxis protein (MCP) signalling domain, Methyl-accepting chemotaxis protein (MCP) signalling domain, Methyl-accepting chemotaxis protein (MCP) signalling domain, HAMP domain, HAMP domain, HAMP domain	GO:0007165, GO:0016021, GO:0007165, GO:0016020, GO:0007165, GO:0016020, GO:0007165, GO:0016020, GO:0007165, GO:0016021, GO:0007165, GO:0016021, GO:0007165, GO:0016021
NZ_CP050969.1_191_18	1214065.BAGV01000014_gene2928	1.6e-196	692.2	Gammaproteobacteria	pyrC		3.5.2.3	ko:K01465	ko00240,ko01100,map00240,map01100	M00051	R01993	RC00632	ko00000,ko00001,ko00002,ko01000				Bacteria	1MW10@1224,1RMQC@1236,COG0044@1,COG0044@2	NA|NA|NA	F	Catalyzes the reversible hydrolysis of the amide bond within dihydroorotate. This metabolic intermediate is required for the biosynthesis of pyrimidine nucleotides	Gene3D, PANTHER, SUPERFAMILY, Pfam, Gene3D, ProSitePatterns, PANTHER, SUPERFAMILY, CDD	G3DSA:2.30.40.10, PTHR43668, SSF51556, PF01979, G3DSA:3.20.20.140, PS00483, PTHR43668:SF2, SSF51338, cd01318	Amidohydrolase family, Dihydroorotase signature 2., DHOase_IIb	IPR011059, IPR032466, IPR006680, IPR002195, IPR011059	Metal-dependent hydrolase, composite domain superfamily, Metal-dependent hydrolase, Amidohydrolase-related, Dihydroorotase, conserved site, Metal-dependent hydrolase, composite domain superfamily	GO:0016810, GO:0016787, GO:0016812, GO:0016810	KEGG: 00240+3.5.2.3|MetaCyc: PWY-5686|MetaCyc: PWY-7790|MetaCyc: PWY-7791
NZ_CP050969.1_191_19	1111728.ATYS01000017_gene3177	3.7e-231	807.4	Gammaproteobacteria	ptsG	GO:0003674,GO:0003824,GO:0005215,GO:0005575,GO:0005622,GO:0005623,GO:0005737,GO:0005829,GO:0005886,GO:0005887,GO:0006810,GO:0008150,GO:0008643,GO:0008645,GO:0009401,GO:0015144,GO:0015749,GO:0016020,GO:0016021,GO:0016740,GO:0016772,GO:0016773,GO:0022804,GO:0022857,GO:0031224,GO:0031226,GO:0034219,GO:0044424,GO:0044425,GO:0044444,GO:0044459,GO:0044464,GO:0051179,GO:0051234,GO:0055085,GO:0071702,GO:…	2.7.1.199	ko:K02778,ko:K02779,ko:K20116,ko:K20117,ko:K20118	ko00010,ko00520,ko02060,ko05111,map00010,map00520,map02060,map05111	M00265,M00809	R02738	RC00017,RC03206	ko00000,ko00001,ko00002,ko01000,ko02000	4.A.1.1.1,4.A.1.1.13,4.A.1.1.14,4.A.1.1.9			Bacteria	1MY1V@1224,1RMYZ@1236,COG1263@1,COG1263@2,COG1264@1,COG1264@2	NA|NA|NA	G	Phosphotransferase System	Pfam, PANTHER, Pfam, SUPERFAMILY, ProSiteProfiles, TIGRFAM, TIGRFAM, ProSitePatterns, CDD, ProSiteProfiles, Gene3D, PANTHER	PF00367, PTHR30009:SF21, PF02378, SSF55604, PS51103, TIGR00826, TIGR02002, PS01035, cd00212, PS51098, G3DSA:3.30.1360.60, PTHR30009	phosphotransferase system, EIIB, Phosphotransferase system, EIIC, PTS_EIIC type-1 domain profile., EIIB_glc: PTS system, glucose-like IIB component, PTS-II-BC-glcB: PTS system, glucose-specific IIBC component, PTS EIIB domains cysteine phosphorylation site signature., PTS_IIB_glc, PTS_EIIB type-1 domain profile.	IPR018113, IPR003352, IPR036878, IPR013013, IPR001996, IPR011299, IPR018113, IPR018113, IPR001996, IPR036878	Phosphotransferase system EIIB, cysteine phosphorylation site, Phosphotransferase system, EIIC, Glucose permease domain IIB, Phosphotransferase system, EIIC component, type 1, Phosphotransferase system, IIB component, type 1, PTS system glucose-specific IIBC component, Phosphotransferase system EIIB, cysteine phosphorylation site, Phosphotransferase system EIIB, cysteine phosphorylation site, Pho…	GO:0008982, GO:0008982, GO:0009401, GO:0016020, GO:0008982, GO:0009401, GO:0008982, GO:0009401, GO:0005355, GO:0016021, GO:1904659, GO:0008982, GO:0008982, GO:0008982, GO:0009401, GO:0008982, GO:0009401
NZ_CP050969.1_191_2	1216966.BAUC01000012_gene261	2.9e-99	368.6	Gammaproteobacteria	qmcA	GO:0005575,GO:0005623,GO:0005886,GO:0016020,GO:0044464,GO:0071944											Bacteria	1MUM8@1224,1RNW8@1236,COG0330@1,COG0330@2	NA|NA|NA	O	COG0330 Membrane protease subunits stomatin prohibitin homologs	CDD, PANTHER, PRINTS, PRINTS, PRINTS, PRINTS, PRINTS, SMART, PANTHER, SUPERFAMILY, Gene3D, ProSitePatterns, Pfam	cd08829, PTHR43327:SF15, PR00721, PR00721, PR00721, PR00721, PR00721, SM00244, PTHR43327, SSF117892, G3DSA:3.30.479.30, PS01270, PF01145	SPFH_paraslipin, Stomatin signature, Stomatin signature, Stomatin signature, Stomatin signature, Stomatin signature,Band 7 protein family signature., SPFH domain / Band 7 family	IPR001972, IPR001972, IPR001972, IPR001972, IPR001972, IPR001107, IPR036013, IPR018080, IPR001107	Stomatin family, Stomatin family, Stomatin family, Stomatin family, Stomatin family, Band 7 domain, Band 7/SPFH domain superfamily, Band 7/stomatin-like, conserved site, Band 7 domain	GO:0016020, GO:0016020, GO:0016020, GO:0016020, GO:0016020
NZ_CP050969.1_191_20	1484157.PSNIH2_10235	3.2e-96	358.2	Pantoea	ycfH	GO:0003674,GO:0003824,GO:0004518,GO:0004536,GO:0005575,GO:0005622,GO:0005623,GO:0005737,GO:0005829,GO:0006139,GO:0006259,GO:0006308,GO:0006725,GO:0006807,GO:0008150,GO:0008152,GO:0009056,GO:0009057,GO:0009987,GO:0016787,GO:0016788,GO:0019439,GO:0034641,GO:0034655,GO:0043170,GO:0044237,GO:0044238,GO:0044248,GO:0044260,GO:0044265,GO:0044270,GO:0044424,GO:0044444,GO:0044464,GO:0046483,GO:0046700,GO:…		ko:K03424					ko00000,ko01000				Bacteria	1MUC0@1224,1RP6E@1236,3VZTX@53335,COG0084@1,COG0084@2	NA|NA|NA	L	Hydrolase, TatD family	CDD, TIGRFAM, PANTHER, ProSitePatterns, Gene3D, PIRSF, ProSitePatterns, Pfam, SUPERFAMILY, PANTHER, ProSitePatterns	cd01310, TIGR00010, PTHR10060:SF40, PS01091, G3DSA:3.20.20.140, PIRSF005902, PS01137, PF01026, SSF51556, PTHR10060, PS01090	TatD_DNAse, TIGR00010: hydrolase, TatD family, TatD deoxyribonuclease family signature 3., TatD deoxyribonuclease family signature 1., TatD related DNase, TatD deoxyribonuclease family signature 2.	IPR001130, IPR015991, IPR018228, IPR001130, IPR018228, IPR001130, IPR032466, IPR001130, IPR018228	TatD family, Uncharacterised hydrolase TatD-type, Deoxyribonuclease, TatD-related, conserved site, TatD family, Deoxyribonuclease, TatD-related, conserved site, TatD family, Metal-dependent hydrolase, TatD family, Deoxyribonuclease, TatD-related, conserved site	GO:0016788, GO:0004536, GO:0016888, GO:0016788, GO:0016888, GO:0016788, GO:0016788, GO:0016888
NZ_CP050969.1_191_21	1441930.Z042_23485	1.5e-71	276.6	Serratia	holB	GO:0005575,GO:0005622,GO:0005623,GO:0006139,GO:0006259,GO:0006260,GO:0006261,GO:0006725,GO:0006807,GO:0008150,GO:0008152,GO:0009058,GO:0009059,GO:0009360,GO:0009987,GO:0032991,GO:0034641,GO:0034645,GO:0042575,GO:0043170,GO:0044237,GO:0044238,GO:0044249,GO:0044260,GO:0044424,GO:0044464,GO:0046483,GO:0061695,GO:0071704,GO:0090304,GO:1901360,GO:1901576,GO:1902494,GO:1990234	2.7.7.7	ko:K02341	ko00230,ko00240,ko01100,ko03030,ko03430,ko03440,map00230,map00240,map01100,map03030,map03430,map03440	M00260	R00375,R00376,R00377,R00378	RC02795	ko00000,ko00001,ko00002,ko01000,ko03032,ko03400				Bacteria	1MY1W@1224,1RNYA@1236,3ZZK8@613,COG0470@1,COG0470@2	NA|NA|NA	L	the delta subunit seems to interact with the gamma subunit to transfer the beta subunit on the DNA	TIGRFAM, PANTHER, Gene3D, SUPERFAMILY, PANTHER, Gene3D, Pfam, SUPERFAMILY, Pfam	TIGR00678, PTHR11669, G3DSA:3.40.50.300, SSF52540, PTHR11669:SF8, G3DSA:1.20.272.10, PF13177, SSF48019, PF09115	[\holB: DNA polymerase III, delta subunit\", DNA polymerase III, delta subunit, DNA polymerase III, delta subunit, C terminal"	IPR004622, IPR027417, IPR008921, IPR015199	DNA polymerase III, delta prime subunit, P-loop containing nucleoside triphosphate hydrolase, DNA polymerase III, clamp loader complex, gamma/delta/delta subunit, C-terminal, DNA polymerase III, delta subunit, C-terminal	GO:0003887, GO:0006260, GO:0008408, GO:0003677, GO:0006260, GO:0003677, GO:0003887, GO:0006260, GO:0009360	KEGG: 00230+2.7.7.7|KEGG: 00240+2.7.7.7, Reactome: R-HSA-110312|Reactome: R-HSA-110314|Reactome: R-HSA-110320|Reactome: R-HSA-174411|Reactome: R-HSA-5651801|Reactome: R-HSA-5655862|Reactome: R-HSA-5656121|Reactome: R-HSA-5656169|Reactome: R-HSA-5685942|Reactome: R-HSA-5696397|Reactome: R-HSA-5696400|Reactome: R-HSA-6782135|Reactome: R-HSA-6782210|Reactome: R-HSA-69091, KEGG: 00230+2.7.7.7|KEGG: 0…
NZ_CP050969.1_191_22	78398.KS43_00930	2.4e-81	308.5	Pectobacterium	tmk	GO:0003674,GO:0003824,GO:0004798,GO:0005575,GO:0005622,GO:0005623,GO:0005737,GO:0005829,GO:0006139,GO:0006220,GO:0006221,GO:0006227,GO:0006233,GO:0006235,GO:0006725,GO:0006753,GO:0006793,GO:0006796,GO:0006807,GO:0008150,GO:0008152,GO:0009041,GO:0009058,GO:0009117,GO:0009123,GO:0009132,GO:0009133,GO:0009138,GO:0009139,GO:0009141,GO:0009142,GO:0009147,GO:0009148,GO:0009165,GO:0009186,GO:0009189,GO:…	2.7.4.9	ko:K00943	ko00240,ko01100,map00240,map01100	M00053	R02094,R02098	RC00002	ko00000,ko00001,ko00002,ko01000			iECABU_c1320.ECABU_c13120,ic_1306.c1370	Bacteria	1MPTD@122277,1MV9C@1224,1S26C@1236,COG0125@1,COG0125@2	NA|NA|NA	F	Phosphorylation of dTMP to form dTDP in both de novo and salvage pathways of dTTP synthesis	TIGRFAM, Hamap, CDD, ProSitePatterns, SUPERFAMILY, Gene3D, Pfam, PANTHER	TIGR00041, MF_00165, cd01672, PS01331, SSF52540, G3DSA:3.40.50.300, PF02223, PTHR10344	DTMP_kinase: dTMP kinase, Thymidylate kinase [tmk]., TMPK, Thymidylate kinase signature., Thymidylate kinase	IPR018094, IPR018094, IPR018095, IPR027417, IPR039430	Thymidylate kinase, Thymidylate kinase, Thymidylate kinase, conserved site, P-loop containing nucleoside triphosphate hydrolase, Thymidylate kinase-like domain	GO:0004798, GO:0005524, GO:0006233, GO:0004798, GO:0005524, GO:0006233, GO:0004798, GO:0005524, GO:0006233, nan]	KEGG: 00240+2.7.4.9|MetaCyc: PWY-6545|MetaCyc: PWY-7184|MetaCyc: PWY-7187|MetaCyc: PWY-7197|MetaCyc: PWY-7198|MetaCyc: PWY-7210|Reactome: R-HSA-499943, KEGG: 00240+2.7.4.9|MetaCyc: PWY-6545|MetaCyc: PWY-7184|MetaCyc: PWY-7187|MetaCyc: PWY-7197|MetaCyc: PWY-7198|MetaCyc: PWY-7210|Reactome: R-HSA-499943, KEGG: 00240+2.7.4.9|MetaCyc: PWY-6545|MetaCyc: PWY-7184|MetaCyc: PWY-7187|MetaCyc: PWY-7197|Met…
NZ_CP050969.1_191_23	633.DJ40_4075	4.1e-112	411.4	Yersinia	mltG	GO:0000270,GO:0003674,GO:0003824,GO:0005575,GO:0005623,GO:0005886,GO:0005887,GO:0006022,GO:0006807,GO:0008150,GO:0008152,GO:0008932,GO:0008933,GO:0016020,GO:0016021,GO:0016740,GO:0016757,GO:0030203,GO:0030288,GO:0030313,GO:0031224,GO:0031226,GO:0031975,GO:0042597,GO:0043170,GO:0044425,GO:0044459,GO:0044464,GO:0061783,GO:0071704,GO:0071944,GO:1901135,GO:1901564		ko:K07082					ko00000				Bacteria	1MUQF@1224,1RMWD@1236,41EE1@629,COG1559@1,COG1559@2	NA|NA|NA	S	Functions as a peptidoglycan terminase that cleaves nascent peptidoglycan strands endolytically to terminate their elongation	PANTHER, Coils, Hamap, CDD, Pfam, TIGRFAM, Gene3D, Gene3D	PTHR30518, Coil, MF_02065, cd08010, PF02618, TIGR00247, G3DSA:3.30.160.60, G3DSA:3.30.160.60	Endolytic murein transglycosylase [mltG]., yceG_like, YceG-like family, TIGR00247: conserved hypothetical protein, YceG family	IPR003770, IPR003770, IPR003770, IPR003770, IPR003770	Endolytic murein transglycosylase, Endolytic murein transglycosylase, Endolytic murein transglycosylase, Endolytic murein transglycosylase, Endolytic murein transglycosylase
NZ_CP050969.1_191_24	891974.E05_36760	3.7e-69	268.5	unclassified Enterobacteriaceae	pabC	GO:0003674,GO:0003824,GO:0005488,GO:0006082,GO:0006575,GO:0006725,GO:0006732,GO:0006760,GO:0006807,GO:0008144,GO:0008150,GO:0008152,GO:0008696,GO:0009987,GO:0016829,GO:0016830,GO:0016833,GO:0019752,GO:0019842,GO:0030170,GO:0034641,GO:0036094,GO:0042558,GO:0043167,GO:0043168,GO:0043436,GO:0043603,GO:0044237,GO:0044281,GO:0046483,GO:0048037,GO:0050662,GO:0051186,GO:0070279,GO:0071704,GO:0097159,GO:…	2.6.1.42,4.1.3.38	ko:K00826,ko:K02619	ko00270,ko00280,ko00290,ko00770,ko00790,ko01100,ko01110,ko01130,ko01210,ko01230,map00270,map00280,map00290,map00770,map00790,map01100,map01110,map01130,map01210,map01230	M00019,M00036,M00119,M00570	R01090,R01214,R02199,R05553,R10991	RC00006,RC00036,RC01843,RC02148	ko00000,ko00001,ko00002,ko01000,ko01007			iAPECO1_1312.APECO1_177,iE2348C_1286.E2348C_1188,iECED1_1282.ECED1_1239,iECNA114_1301.ECNA114_1153,iECOK1_1307.ECOK1_1203,iECS88_1305.ECS88_1110,iECSF_1327.ECSF_0995,iECUMN_1333.ECUMN_1273,iJN746.PP_1917,iPC815.YPO1603,iUMN146_1321.UM146_11845,iUTI89_1310.UTI89_C1222,ic_1306.c1366	Bacteria	1MZAK@1224,1RPPG@1236,283D1@191675,COG0115@1,COG0115@2	NA|NA|NA	E	Amino-transferase class IV	SUPERFAMILY, PANTHER, TIGRFAM, Gene3D, Gene3D, Pfam, CDD, PANTHER	SSF56752, PTHR42743:SF2, TIGR03461, G3DSA:3.30.470.10, G3DSA:3.20.10.10, PF01063, cd01559, PTHR42743	pabC_Proteo: aminodeoxychorismate lyase, Amino-transferase class IV, ADCL_like	IPR036038, IPR017824, IPR001544, IPR017824	Aminotransferase-like, PLP-dependent enzymes, Aminodeoxychorismate lyase, class IV, Aminotransferase class IV, Aminodeoxychorismate lyase, class IV	GO:0003824, GO:0008696, GO:0030170, GO:0046656, GO:0003824, GO:0008696, GO:0030170, GO:0046656	Reactome: R-HSA-70895, KEGG: 00790+4.1.3.38|MetaCyc: PWY-6543, Reactome: R-HSA-70895, KEGG: 00790+4.1.3.38|MetaCyc: PWY-6543
NZ_CP050969.1_191_25	349966.DJ58_2531	3.9e-197	694.1	Yersinia	fabF	GO:0003674,GO:0003824,GO:0004312,GO:0004315,GO:0006082,GO:0006629,GO:0006631,GO:0006633,GO:0008150,GO:0008152,GO:0008610,GO:0009058,GO:0009987,GO:0016053,GO:0016740,GO:0016746,GO:0016747,GO:0019752,GO:0032787,GO:0033817,GO:0043436,GO:0044237,GO:0044238,GO:0044249,GO:0044255,GO:0044281,GO:0044283,GO:0046394,GO:0071704,GO:0072330,GO:1901576	2.3.1.179	ko:K09458	ko00061,ko00780,ko01100,ko01212,map00061,map00780,map01100,map01212	M00083,M00572	R04355,R04726,R04952,R04957,R04960,R04963,R04968,R07762,R10115,R10119	RC00039,RC02728,RC02729,RC02888	ko00000,ko00001,ko00002,ko01000,ko01004			iAF1260.b1095,iAPECO1_1312.APECO1_176,iB21_1397.B21_01099,iBWG_1329.BWG_0943,iE2348C_1286.E2348C_1187,iEC042_1314.EC042_1165,iEC55989_1330.EC55989_1207,iECABU_c1320.ECABU_c13085,iECBD_1354.ECBD_2506,iECB_1328.ECB_01091,iECDH10B_1368.ECDH10B_1167,iECDH1ME8569_1439.ECDH1ME8569_1030,iECD_1391.ECD_01091,iECED1_1282.ECED1_1238,iECH74115_1262.ECH74115_1474,iECIAI1_1343.ECIAI1_1130,iECIAI39_1322.ECIAI39…	Bacteria	1MU1X@1224,1RMDE@1236,41EUZ@629,COG0304@1,COG0304@2	NA|NA|NA	I	Catalyzes the condensation reaction of fatty acid synthesis by the addition to an acyl acceptor of two carbons from malonyl-ACP	SMART, Pfam, SUPERFAMILY, SUPERFAMILY, Gene3D, Gene3D, Pfam, PANTHER, ProSitePatterns, PIRSF, PANTHER, CDD, TIGRFAM	SM00825, PF02801, SSF53901, SSF53901, G3DSA:3.40.47.10, G3DSA:3.40.47.10, PF00109, PTHR11712, PS00606, PIRSF000447, PTHR11712:SF226, cd00834, TIGR03150	Beta-ketoacyl synthase, Beta-ketoacyl synthase, C-terminal domain,Beta-ketoacyl synthase, N-terminal domain, Beta-ketoacyl synthases active site., KAS_I_II, fabF: beta-ketoacyl-acyl-carrier-protein synthase II	IPR020841, IPR014031, IPR016039, IPR016039, IPR016039, IPR016039, IPR014030, IPR018201, IPR017568, IPR017568	Polyketide synthase, beta-ketoacyl synthase domain, Beta-ketoacyl synthase, C-terminal, Thiolase-like, Thiolase-like, Thiolase-like, Thiolase-like, Beta-ketoacyl synthase, N-terminal, Beta-ketoacyl synthase, active site, 3-oxoacyl-[acyl-carrier-protein] synthase 2, 3-oxoacyl-[acyl-carrier-protein] synthase 2	GO:0003824, GO:0003824, GO:0003824, GO:0003824, GO:0006633, GO:0016747, GO:0006633, GO:0016747
NZ_CP050969.1_191_26	747.DR93_17	1.1e-28	132.1	Pasteurellales	acpP	GO:0000035,GO:0000036,GO:0003674,GO:0005488,GO:0005575,GO:0005622,GO:0005623,GO:0005737,GO:0005829,GO:0005975,GO:0006082,GO:0006629,GO:0006631,GO:0006633,GO:0006643,GO:0006644,GO:0006664,GO:0006793,GO:0006796,GO:0008150,GO:0008152,GO:0008289,GO:0008610,GO:0008654,GO:0009058,GO:0009245,GO:0009247,GO:0009311,GO:0009312,GO:0009987,GO:0016051,GO:0016053,GO:0019637,GO:0019752,GO:0019842,GO:0031177,GO:…		ko:K02078					ko00000,ko00001				Bacteria	1MZ4P@1224,1S8X4@1236,1Y907@135625,COG0236@1,COG0236@2	NA|NA|NA	IQ	Carrier of the growing fatty acid chain in fatty acid biosynthesis	PANTHER, TIGRFAM, ProSiteProfiles, ProSitePatterns, Hamap, ProDom, SUPERFAMILY, Pfam, Gene3D, PANTHER	PTHR20863, TIGR00517, PS50075, PS00012, MF_01217, PD000887, SSF47336, PF00550, G3DSA:1.10.1200.10, PTHR20863:SF38	acyl_carrier: acyl carrier protein, Carrier protein (CP) domain profile., Phosphopantetheine attachment site., Acyl carrier protein [acpP]., CARRIER ACYL PHOSPHOPANTETHEINE ACP ACID FATTY BIOSYNTHESIS LIPID SYNTHESIS CHLOROPLAST, Phosphopantetheine attachment site	IPR003231, IPR009081, IPR006162, IPR003231, IPR003231, IPR036736, IPR009081, IPR036736	Acyl carrier protein (ACP), Phosphopantetheine binding ACP domain, Phosphopantetheine attachment site, Acyl carrier protein (ACP), Acyl carrier protein (ACP), ACP-like superfamily, Phosphopantetheine binding ACP domain, ACP-like superfamily	GO:0006633, GO:0006633, GO:0006633, nan]	Reactome: R-HSA-389661|Reactome: R-HSA-611105|Reactome: R-HSA-6799198|Reactome: R-HSA-77289, Reactome: R-HSA-389661|Reactome: R-HSA-611105|Reactome: R-HSA-6799198|Reactome: R-HSA-77289, Reactome: R-HSA-389661|Reactome: R-HSA-611105|Reactome: R-HSA-6799198|Reactome: R-HSA-77289, nan]
NZ_CP050969.1_191_27	1216966.BAUC01000003_gene2599	3.4e-108	397.9	Gammaproteobacteria													Bacteria	1MU6X@1224,1RMBB@1236,COG1028@1,COG1028@2	NA|NA|NA	IQ	reductase	PANTHER, PRINTS, PRINTS, PRINTS, TIGRFAM, PRINTS, PRINTS, PRINTS, PRINTS, PRINTS, PRINTS, PANTHER, Gene3D, CDD, Pfam, SUPERFAMILY, SMART, ProSitePatterns	PTHR42760:SF52, PR00080, PR00080, PR00080, TIGR01830, PR00081, PR00081, PR00081, PR00081, PR00081, PR00081, PTHR42760, G3DSA:3.40.50.720, cd05333, PF13561, SSF51735, SM00822, PS00061	Short-chain dehydrogenase/reductase (SDR) superfamily signature, Short-chain dehydrogenase/reductase (SDR) superfamily signature, Short-chain dehydrogenase/reductase (SDR) superfamily signature, 3oxo_ACP_reduc: 3-oxoacyl-[acyl-carrier-protein] reductase, Glucose/ribitol dehydrogenase family signature, Glucose/ribitol dehydrogenase family signature, Glucose/ribitol dehydrogenase family signature, …	IPR002347, IPR002347, IPR002347, IPR011284, IPR002347, IPR002347, IPR002347, IPR002347, IPR002347, IPR002347,IPR036291, IPR020904	Short-chain dehydrogenase/reductase SDR, Short-chain dehydrogenase/reductase SDR, Short-chain dehydrogenase/reductase SDR, 3-oxoacyl-(acyl-carrier-protein) reductase, Short-chain dehydrogenase/reductase SDR, Short-chain dehydrogenase/reductase SDR, Short-chain dehydrogenase/reductase SDR, Short-chain dehydrogenase/reductase SDR, Short-chain dehydrogenase/reductase SDR, Short-chain dehydrogenase/r…	GO:0004316, GO:0006633, GO:0051287, GO:0055114, GO:0016491	KEGG: 00061+1.1.1.100|KEGG: 00780+1.1.1.100|MetaCyc: PWY-5367|MetaCyc: PWY-5971|MetaCyc: PWY-5973|MetaCyc: PWY-5989|MetaCyc: PWY-5994|MetaCyc: PWY-6113|MetaCyc: PWY-6282|MetaCyc: PWY-6519|MetaCyc: PWY-7388|MetaCyc: PWY-7663|MetaCyc: PWY-7664|MetaCyc: PWY-7858|MetaCyc: PWYG-321
NZ_CP050969.1_191_28	399741.Spro_1905	1.6e-142	512.3	Serratia	fabD	GO:0003674,GO:0003824,GO:0004312,GO:0004314,GO:0005575,GO:0005622,GO:0005623,GO:0005737,GO:0005829,GO:0006082,GO:0006629,GO:0006631,GO:0006633,GO:0008150,GO:0008152,GO:0008610,GO:0009058,GO:0009987,GO:0016053,GO:0016417,GO:0016419,GO:0016420,GO:0016740,GO:0016746,GO:0016747,GO:0019752,GO:0032787,GO:0043436,GO:0044237,GO:0044238,GO:0044249,GO:0044255,GO:0044281,GO:0044283,GO:0044424,GO:0044444,GO:…	2.3.1.39	ko:K00645	ko00061,ko00333,ko01100,ko01130,ko01212,map00061,map00333,map01100,map01130,map01212	M00082	R01626,R11671	RC00004,RC00039,RC02727	ko00000,ko00001,ko00002,ko01000,ko01004			iEcE24377_1341.EcE24377A_1213,iJN746.PP_1913,iPC815.YPO1598	Bacteria	1MV6N@1224,1RNH3@1236,400V0@613,COG0331@1,COG0331@2	NA|NA|NA	I	malonyl CoA-acyl carrier protein transacylase	PANTHER, TIGRFAM, PANTHER, PIRSF, Gene3D, SUPERFAMILY, Pfam, Gene3D, SUPERFAMILY, SMART	PTHR42681:SF1, TIGR00128, PTHR42681, PIRSF000446, G3DSA:3.30.70.250, SSF52151, PF00698, G3DSA:3.40.366.10, SSF55048, SM00827	fabD: malonyl CoA-acyl carrier protein transacylase,Acyl transferase domain, Acyl transferase domain in polyketide synthase (PKS) enzymes.	IPR004410, IPR024925, IPR016035, IPR014043, IPR001227, IPR016036, IPR020801	Malonyl CoA-acyl carrier protein transacylase, FabD-type, Malonyl CoA-acyl carrier protein transacylase, Acyl transferase/acyl hydrolase/lysophospholipase, Acyl transferase, Acyl transferase domain superfamily, Malonyl-CoA ACP transacylase, ACP-binding, Polyketide synthase, acyl transferase domain	GO:0004314, GO:0016740	KEGG: 00061+2.3.1.39|MetaCyc: PWY-4381|MetaCyc: PWY-6799|MetaCyc: PWY-7388, KEGG: 00061+2.3.1.39|MetaCyc: PWY-4381|MetaCyc: PWY-6799|MetaCyc: PWY-7388
NZ_CP050969.1_191_29	527002.yaldo0001_17860	4.9e-139	500.7	Yersinia	fabH	GO:0003674,GO:0003824,GO:0004312,GO:0004315,GO:0005575,GO:0005622,GO:0005623,GO:0005737,GO:0005829,GO:0006082,GO:0006629,GO:0006631,GO:0006633,GO:0008150,GO:0008152,GO:0008610,GO:0009058,GO:0009987,GO:0016053,GO:0016740,GO:0016746,GO:0016747,GO:0019752,GO:0032787,GO:0033818,GO:0043436,GO:0044237,GO:0044238,GO:0044249,GO:0044255,GO:0044281,GO:0044283,GO:0044424,GO:0044444,GO:0044464,GO:0046394,GO:…	2.3.1.180	ko:K00648	ko00061,ko01100,ko01212,map00061,map01100,map01212	M00082,M00083	R10707	RC00004,RC02729,RC02888	ko00000,ko00001,ko00002,ko01000,ko01004			iAF1260.b1091,iAPECO1_1312.APECO1_172,iBWG_1329.BWG_0939,iE2348C_1286.E2348C_1183,iEC55989_1330.EC55989_1203,iECABU_c1320.ECABU_c13040,iECDH10B_1368.ECDH10B_1163,iECDH1ME8569_1439.ECDH1ME8569_1026,iECED1_1282.ECED1_1234,iECH74115_1262.ECH74115_1470,iECIAI39_1322.ECIAI39_2070,iECO103_1326.ECO103_1136,iECO111_1330.ECO111_1368,iECO26_1355.ECO26_1424,iECOK1_1307.ECOK1_1198,iECP_1309.ECP_1083,iECS88_1…	Bacteria	1MU9N@1224,1RNIR@1236,41F2B@629,COG0332@1,COG0332@2	NA|NA|NA	I	Catalyzes the condensation reaction of fatty acid synthesis by the addition to an acyl acceptor of two carbons from malonyl-ACP. Catalyzes the first condensation reaction which initiates fatty acid synthesis and may therefore play a role in governing the total rate of fatty acid production. Possesses both acetoacetyl-ACP synthase and acetyl transacylase activities. Its substrate specificity deter…	Hamap, Gene3D, SUPERFAMILY, Pfam, TIGRFAM, CDD, PANTHER, Pfam	MF_01815, G3DSA:3.40.47.10, SSF53901, PF08545, TIGR00747, cd00830, PTHR43091, PF08541	3-oxoacyl-[acyl-carrier-protein] synthase 3 [fabH]., 3-Oxoacyl-[acyl-carrier-protein (ACP)] synthase III, fabH: 3-oxoacyl-[acyl-carrier-protein] synthase III, KAS_III, 3-Oxoacyl-[acyl-carrier-protein (ACP)] synthase III C terminal	IPR004655, IPR016039, IPR016039, IPR013751, IPR004655, IPR013747	3-oxoacyl-[acyl-carrier-protein] synthase 3, Thiolase-like, Thiolase-like, 3-Oxoacyl-[acyl-carrier-protein (ACP)] synthase III, 3-oxoacyl-[acyl-carrier-protein] synthase 3, 3-Oxoacyl-[acyl-carrier-protein (ACP)] synthase III, C-terminal	GO:0004315, GO:0006633, GO:0003824, GO:0003824, GO:0004315, GO:0006633, GO:0004315, GO:0006633	KEGG: 00061+2.3.1.180|MetaCyc: PWY-4381, KEGG: 00061+2.3.1.180|MetaCyc: PWY-4381, KEGG: 00061+2.3.1.180|MetaCyc: PWY-4381, KEGG: 00061+2.3.1.180|MetaCyc: PWY-4381
NZ_CP050969.1_191_3	393305.YE1712	3.6e-158	564.7	Yersinia	lolE	GO:0005575,GO:0005623,GO:0005886,GO:0005887,GO:0008104,GO:0008150,GO:0016020,GO:0016021,GO:0031224,GO:0031226,GO:0032991,GO:0033036,GO:0034613,GO:0044425,GO:0044459,GO:0044464,GO:0044872,GO:0044873,GO:0044874,GO:0051179,GO:0051641,GO:0070727,GO:0071944,GO:0072657,GO:0098796,GO:0098797		ko:K02004,ko:K09808	ko02010,map02010	M00255,M00258			ko00000,ko00001,ko00002,ko02000	3.A.1,3.A.1.125			Bacteria	1MVV7@1224,1RMP9@1236,41F2G@629,COG4591@1,COG4591@2	NA|NA|NA	M	system transmembrane protein lolE	Pfam, PANTHER, TIGRFAM, Pfam, PANTHER, TIGRFAM	PF12704, PTHR30489:SF0, TIGR02213, PF02687, PTHR30489, TIGR02212	MacB-like periplasmic core domain, lolE_release: lipoprotein releasing system, transmembrane protein LolE, FtsX-like permease family, lolCE: lipoprotein releasing system, transmembrane protein, LolC/E family	IPR025857, IPR011926, IPR003838, IPR011925	MacB-like periplasmic core domain, Lipoprotein-releasing system transmembrane protein LolC/E, gammaproteobacteria type, ABC transporter permease protein domain, Lipoprotein-releasing system transmembrane protein LolC/E	GO:0016021, GO:0042953, GO:0042954, GO:0044874, GO:0016020, GO:0016021, GO:0042953, GO:0042954
NZ_CP050969.1_191_30	1214065.BAGV01000014_gene2916	2e-111	409.1	unclassified Enterobacteriaceae	plsX	GO:0003674,GO:0003824,GO:0005575,GO:0005622,GO:0005623,GO:0005737,GO:0006629,GO:0006644,GO:0006793,GO:0006796,GO:0008150,GO:0008152,GO:0008610,GO:0008654,GO:0009058,GO:0009987,GO:0019637,GO:0044237,GO:0044238,GO:0044249,GO:0044255,GO:0044424,GO:0044464,GO:0071704,GO:0090407,GO:1901576	2.3.1.15	ko:K03621	ko00561,ko00564,ko01100,ko01110,map00561,map00564,map01100,map01110	M00089	R00851,R09380	RC00004,RC00039,RC00041	ko00000,ko00001,ko00002,ko01000,ko01004			iEcDH1_1363.EcDH1_2557,iSFxv_1172.SFxv_1246,iY75_1357.Y75_RS05695	Bacteria	1MVM3@1224,1RM7R@1236,2839V@191675,COG0416@1,COG0416@2	NA|NA|NA	I	Catalyzes the reversible formation of acyl-phosphate (acyl-PO(4)) from acyl- acyl-carrier-protein (acyl-ACP). This enzyme utilizes acyl-ACP as fatty acyl donor, but not acyl-CoA	TIGRFAM, PIRSF, Gene3D, Pfam, PANTHER, SUPERFAMILY, Hamap	TIGR00182, PIRSF002465, G3DSA:3.40.718.10, PF02504, PTHR30100, SSF53659, MF_00019	plsX: fatty acid/phospholipid synthesis protein PlsX, Fatty acid synthesis protein, Phosphate acyltransferase [plsX].	IPR012281, IPR012281, IPR003664, IPR012281, IPR012281	Phospholipid biosynthesis protein, PlsX-like, Phospholipid biosynthesis protein, PlsX-like, Fatty acid synthesis PlsX protein, Phospholipid biosynthesis protein, PlsX-like, Phospholipid biosynthesis protein, PlsX-like	GO:0006633, GO:0006633, GO:0003824, GO:0006633, GO:0016747, GO:0006633, GO:0006633
NZ_CP050969.1_191_31	1577887.JSYG01000004_gene868	3.3e-19	100.1	Dickeya	rpmF	GO:0000027,GO:0000302,GO:0003674,GO:0003735,GO:0005198,GO:0005575,GO:0005622,GO:0005623,GO:0005737,GO:0005829,GO:0005840,GO:0006412,GO:0006518,GO:0006807,GO:0006950,GO:0006979,GO:0006996,GO:0008150,GO:0008152,GO:0009058,GO:0009059,GO:0009314,GO:0009628,GO:0009987,GO:0010467,GO:0015934,GO:0016043,GO:0019538,GO:0022607,GO:0022613,GO:0022618,GO:0022625,GO:0022626,GO:0032991,GO:0034622,GO:0034641,GO:…		ko:K02911	ko03010,map03010	M00178			br01610,ko00000,ko00001,ko00002,ko03011,ko03029				Bacteria	1N6RF@1224,1SC9G@1236,2JEJK@204037,COG0333@1,COG0333@2	NA|NA|NA	J	Belongs to the bacterial ribosomal protein bL32 family	Hamap, MobiDBLite, SUPERFAMILY, TIGRFAM, Pfam, PANTHER	MF_00340, mobidb-lite, SSF57829, TIGR01031, PF01783, PTHR35534	50S ribosomal protein L32 [rpmF]., consensus disorder prediction, rpmF_bact: ribosomal protein bL32, Ribosomal L32p protein family	IPR002677, IPR011332, IPR002677, IPR002677, IPR002677	Ribosomal protein L32p, Zinc-binding ribosomal protein, Ribosomal protein L32p, Ribosomal protein L32p, Ribosomal protein L32p	GO:0003735, GO:0006412, GO:0015934, GO:0006412, GO:0003735, GO:0006412, GO:0015934, GO:0003735, GO:0006412, GO:0015934, GO:0003735, GO:0006412, GO:0015934	Reactome: R-HSA-5368286|Reactome: R-HSA-5389840|Reactome: R-HSA-5419276, Reactome: R-HSA-5368286|Reactome: R-HSA-5389840|Reactome: R-HSA-5419276, Reactome: R-HSA-5368286|Reactome: R-HSA-5389840|Reactome: R-HSA-5419276, Reactome: R-HSA-5368286|Reactome: R-HSA-5389840|Reactome: R-HSA-5419276
NZ_CP050969.1_191_32	1453496.AT03_12980	9e-63	246.5	Gammaproteobacteria	yceD	GO:0005575,GO:0005622,GO:0005623,GO:0005737,GO:0005829,GO:0008150,GO:0040007,GO:0044424,GO:0044444,GO:0044464		ko:K07040					ko00000				Bacteria	1PGKW@1224,1RRK3@1236,COG1399@1,COG1399@2	NA|NA|NA	S	metal-binding, possibly nucleic acid-binding protein	Pfam, PANTHER	PF02620, PTHR38099	Uncharacterized ACR, COG1399	IPR003772, IPR039255	Large ribosomal RNA subunit accumulation protein YceD, Large ribosomal RNA subunit accumulation protein YceD, bacteria
NZ_CP050969.1_191_33	1286170.RORB6_09235	4e-67	261.2	Gammaproteobacteria	maf	GO:0003674,GO:0003824,GO:0005575,GO:0005618,GO:0005623,GO:0016462,GO:0016787,GO:0016817,GO:0016818,GO:0030312,GO:0044464,GO:0047429,GO:0071944	1.1.1.25,2.1.1.190	ko:K00014,ko:K03215,ko:K06287	ko00400,ko01100,ko01110,ko01130,ko01230,map00400,map01100,map01110,map01130,map01230	M00022	R02413	RC00206	ko00000,ko00001,ko00002,ko01000,ko03009				Bacteria	1RDA9@1224,1S3TQ@1236,COG0424@1,COG0424@2	NA|NA|NA	D	Maf-like protein	PANTHER, Gene3D, PANTHER, SUPERFAMILY, TIGRFAM, Hamap, PIRSF, CDD, Pfam	PTHR43213:SF7, G3DSA:3.90.950.10, PTHR43213, SSF52972, TIGR00172, MF_00528, PIRSF006305, cd00555, PF02545	maf: septum formation protein Maf, Septum formation protein Maf [maf]., Maf, Maf-like protein	IPR029001, IPR003697, IPR029001, IPR003697, IPR003697, IPR003697, IPR003697, IPR003697	Inosine triphosphate pyrophosphatase-like, Maf-like protein, Inosine triphosphate pyrophosphatase-like, Maf-like protein, Maf-like protein, Maf-like protein, Maf-like protein, Maf-like protein	GO:0047429, GO:0047429, GO:0047429, GO:0047429, GO:0047429, GO:0047429
NZ_CP050969.1_191_34	1453496.AT03_12990	1.4e-141	509.2	Gammaproteobacteria	rluC	GO:0000154,GO:0000455,GO:0001522,GO:0003674,GO:0003824,GO:0005575,GO:0005622,GO:0005623,GO:0005737,GO:0005829,GO:0006139,GO:0006364,GO:0006396,GO:0006725,GO:0006807,GO:0008150,GO:0008152,GO:0009451,GO:0009982,GO:0009987,GO:0010467,GO:0016070,GO:0016072,GO:0016853,GO:0016866,GO:0022613,GO:0031118,GO:0034470,GO:0034641,GO:0034660,GO:0042254,GO:0043170,GO:0043412,GO:0044085,GO:0044237,GO:0044238,GO:…	5.4.99.24	ko:K06179					ko00000,ko01000,ko03009				Bacteria	1MVDX@1224,1RPAN@1236,COG0564@1,COG0564@2	NA|NA|NA	J	Responsible for synthesis of pseudouridine from uracil	PANTHER, Gene3D, SUPERFAMILY, ProSiteProfiles, ProSitePatterns, SMART, CDD, SUPERFAMILY, TIGRFAM, Pfam, CDD, Gene3D, Pfam	PTHR45332, G3DSA:3.30.2350.10, SSF55120, PS50889, PS01129, SM00363, cd00165, SSF55174, TIGR00005, PF00849, cd02869, G3DSA:3.10.290.10, PF01479	S4 RNA-binding domain profile., Rlu family of pseudouridine synthase signature., S4, rluA_subfam: pseudouridine synthase, RluA family, RNA pseudouridylate synthase, PseudoU_synth_RluCD_like, S4 domain	IPR020103, IPR002942, IPR006224, IPR002942, IPR002942, IPR006225, IPR006145, IPR006145, IPR036986, IPR002942	Pseudouridine synthase, catalytic domain superfamily, RNA-binding S4 domain, Pseudouridine synthase, RluC/RluD, conserved site, RNA-binding S4 domain, RNA-binding S4 domain, Pseudouridine synthase, RluC/RluD, Pseudouridine synthase, RsuA/RluB/C/D/E/F, Pseudouridine synthase, RsuA/RluB/C/D/E/F, RNA-binding S4 domain superfamily, RNA-binding S4 domain	GO:0001522, GO:0003723, GO:0009451, GO:0009982, GO:0003723, GO:0001522, GO:0003723, GO:0009451, GO:0009982, GO:0003723, GO:0003723, GO:0001522, GO:0003723, GO:0009451, GO:0009982, GO:0001522, GO:0003723, GO:0009451, GO:0009982, GO:0001522, GO:0003723, GO:0009451, GO:0009982, GO:0003723, GO:0003723	Reactome: R-HSA-156827|Reactome: R-HSA-156902|Reactome: R-HSA-1799339|Reactome: R-HSA-192823|Reactome: R-HSA-2408557|Reactome: R-HSA-6791226|Reactome: R-HSA-72649|Reactome: R-HSA-72689|Reactome: R-HSA-72695|Reactome: R-HSA-72702|Reactome: R-HSA-72706|Reactome: R-HSA-72764|Reactome: R-HSA-9010553|Reactome: R-HSA-975956|Reactome: R-HSA-975957, Reactome: R-HSA-156827|Reactome: R-HSA-156902|Reactome:…
NZ_CP050969.1_191_36	1080067.BAZH01000013_gene836	4.5e-275	954.5	Citrobacter	rne	GO:0000287,GO:0000966,GO:0000967,GO:0003674,GO:0003676,GO:0003723,GO:0003824,GO:0004518,GO:0004540,GO:0005488,GO:0005515,GO:0005575,GO:0005622,GO:0005623,GO:0005737,GO:0006139,GO:0006364,GO:0006396,GO:0006399,GO:0006401,GO:0006402,GO:0006725,GO:0006807,GO:0008033,GO:0008150,GO:0008152,GO:0008312,GO:0008995,GO:0009056,GO:0009057,GO:0009892,GO:0009987,GO:0010467,GO:0010468,GO:0010605,GO:0010629,GO:…	3.1.26.12	ko:K08300	ko03018,map03018	M00394			ko00000,ko00001,ko00002,ko01000,ko03009,ko03019				Bacteria	1MV65@1224,1RMDS@1236,3WWD0@544,COG1530@1,COG1530@2	NA|NA|NA	J	Endoribonuclease that plays a central role in RNA processing and decay. Required for the maturation of 5S and 16S rRNAs and the majority of tRNAs. Also involved in the degradation of most mRNAs	Hamap, Gene3D, MobiDBLite, PANTHER, Coils, MobiDBLite, MobiDBLite, SUPERFAMILY, Pfam, Pfam, Gene3D, SMART, ProSiteProfiles, CDD, PANTHER, MobiDBLite, MobiDBLite, TIGRFAM, Pfam	MF_00970, G3DSA:3.40.1260.20, mobidb-lite, PTHR30001, Coil, mobidb-lite, mobidb-lite, SSF50249, PF12111, PF10150, G3DSA:2.40.50.140, SM00316, PS50126, cd04453, PTHR30001:SF1, mobidb-lite, mobidb-lite, TIGR00757, PF00575	Ribonuclease E [rne]., consensus disorder prediction, consensus disorder prediction, consensus disorder prediction, Polyribonucleotide phosphorylase C terminal, Ribonuclease E/G family, S1 domain profile., S1_RNase_E, consensus disorder prediction, consensus disorder prediction, RNaseEG: ribonuclease, Rne/Rng family, S1 RNA binding domain	IPR028878, IPR012340, IPR021968, IPR019307, IPR022967, IPR003029,IPR004659, IPR003029	Ribonuclease E, Nucleic acid-binding, OB-fold, Polyribonucleotide phosphorylase C-terminal, RNA-binding protein AU-1/Ribonuclease E/G, RNA-binding domain, S1, S1 domain,Ribonuclease E/G, S1 domain	GO:0006396, GO:0008995, GO:0003723, GO:0003676,GO:0003723, GO:0004540, GO:0006396, GO:0003676
NZ_CP050969.1_191_37	NA	NA	NA	NA	NA	NA	NA	NA	NA	NA	NA	NA	NA	NA	NA	NA	NA	NA	NA	NA	NA	Coils	Coil
NZ_CP050969.1_191_38	675817.VDA_001945	1.1e-121	443.4	Vibrionales	anmK	GO:0003674,GO:0003824,GO:0006793,GO:0006796,GO:0008150,GO:0008152,GO:0009987,GO:0016301,GO:0016310,GO:0016740,GO:0016772,GO:0044237	2.7.1.170,4.2.1.126	ko:K07106,ko:K09001	ko00520,ko01100,map00520,map01100		R08555	RC00397,RC00746	ko00000,ko00001,ko01000			iECABU_c1320.ECABU_c18930,iECED1_1282.ECED1_1841,ic_1306.c2032	Bacteria	1MV4E@1224,1RNTZ@1236,1XTEE@135623,COG2377@1,COG2377@2	NA|NA|NA	F	Catalyzes the specific phosphorylation of 1,6-anhydro-N- acetylmuramic acid (anhMurNAc) with the simultaneous cleavage of the 1,6-anhydro ring, generating MurNAc-6-P. Is required for the utilization of anhMurNAc either imported from the medium or derived from its own cell wall murein, and thus plays a role in cell wall recycling	PANTHER, Gene3D, SUPERFAMILY, Gene3D, Pfam, Hamap	PTHR30605, G3DSA:3.30.420.40, SSF53067, G3DSA:3.30.420.40, PF03702, MF_01270	Anhydro-N-acetylmuramic acid kinase, Anhydro-N-acetylmuramic acid kinase [anmK].	IPR005338, IPR005338, IPR005338	Anhydro-N-acetylmuramic acid kinase, Anhydro-N-acetylmuramic acid kinase, Anhydro-N-acetylmuramic acid kinase	GO:0005524, GO:0006040, GO:0009254, GO:0016773, GO:0005524, GO:0006040, GO:0009254, GO:0016773, GO:0005524, GO:0006040, GO:0009254, GO:0016773	MetaCyc: PWY-7883, MetaCyc: PWY-7883, MetaCyc: PWY-7883
NZ_CP050969.1_191_39	665029.EAMY_2255	1.1e-36	161.8	Erwinia	asmA	GO:0005575,GO:0005623,GO:0005886,GO:0008150,GO:0016020,GO:0032386,GO:0032879,GO:0032880,GO:0033157,GO:0044464,GO:0050789,GO:0051049,GO:0051223,GO:0060341,GO:0065007,GO:0070201,GO:0071944,GO:0090087,GO:0090313,GO:1903533,GO:1903827,GO:1905475		ko:K07289,ko:K07290					ko00000	9.B.121			Bacteria	1NVUY@1224,1RPFM@1236,3X4W2@551,COG2982@1,COG2982@2	NA|NA|NA	M	AsmA suppressor of OmpF assembly mutants	Coils, PANTHER, MobiDBLite, MobiDBLite, MobiDBLite, Pfam, Pfam, MobiDBLite, PANTHER	Coil, PTHR30441, mobidb-lite, mobidb-lite, mobidb-lite, PF05170, PF05170, mobidb-lite, PTHR30441:SF4	consensus disorder prediction, consensus disorder prediction, consensus disorder prediction, AsmA family, AsmA family, consensus disorder prediction	IPR007844, IPR007844	AsmA, AsmA
NZ_CP050969.1_191_4	1249634.D781_1846	5.4e-87	327.4	Serratia	lolD	GO:0000166,GO:0003674,GO:0003824,GO:0005215,GO:0005488,GO:0005524,GO:0005575,GO:0005623,GO:0005886,GO:0006807,GO:0006810,GO:0008104,GO:0008144,GO:0008150,GO:0008152,GO:0015031,GO:0015399,GO:0015405,GO:0015833,GO:0016020,GO:0016021,GO:0016462,GO:0016787,GO:0016817,GO:0016818,GO:0016887,GO:0017076,GO:0017111,GO:0019538,GO:0022804,GO:0022857,GO:0030554,GO:0031224,GO:0032553,GO:0032555,GO:0032559,GO:…		ko:K09810	ko02010,map02010	M00255			ko00000,ko00001,ko00002,ko01000,ko02000	3.A.1.125			Bacteria	1MVSQ@1224,1RMWK@1236,40278@613,COG1136@1,COG1136@2	NA|NA|NA	V	Part of the ABC transporter complex LolCDE involved in the translocation of lipoproteins, in an ATP-dependent manner	Gene3D, PANTHER, SMART, ProSitePatterns, CDD, Pfam, ProSiteProfiles, PANTHER, ProSiteProfiles, SUPERFAMILY, TIGRFAM	G3DSA:3.40.50.300, PTHR24220, SM00382, PS00211, cd03255, PF00005, PS50893, PTHR24220:SF654, PS51244, SSF52540, TIGR02211	ABC transporters family signature., ABC_MJ0796_LolCDE_FtsE, ABC transporter, ATP-binding cassette, ABC transporter-type domain profile., Lipoprotein release ATP-binding protein lolD family profile., LolD_lipo_ex: lipoprotein releasing system, ATP-binding protein	IPR003593, IPR017871, IPR003439, IPR003439, IPR015854, IPR027417, IPR011924	AAA+ ATPase domain, ABC transporter, conserved site, ABC transporter-like, ABC transporter-like, ABC transporter, lipoprotein release, LolD, P-loop containing nucleoside triphosphate hydrolase, Lipoprotein releasing system, ATP-binding protein	GO:0005524, GO:0016887, GO:0005524, GO:0016887, GO:0005524, GO:0016887, GO:0005524, GO:0016020, GO:0042953, GO:0042954, GO:0005524, GO:0016020, GO:0044873
NZ_CP050969.1_191_40	214092.YPO1525	1.9e-93	348.6	Yersinia	dcd	GO:0003674,GO:0003824,GO:0004170,GO:0005575,GO:0005622,GO:0005623,GO:0005737,GO:0005829,GO:0006139,GO:0006220,GO:0006244,GO:0006253,GO:0006725,GO:0006753,GO:0006793,GO:0006796,GO:0006807,GO:0008150,GO:0008152,GO:0008829,GO:0009056,GO:0009058,GO:0009117,GO:0009141,GO:0009143,GO:0009147,GO:0009149,GO:0009166,GO:0009200,GO:0009204,GO:0009211,GO:0009213,GO:0009219,GO:0009223,GO:0009262,GO:0009264,GO:…	3.5.4.13	ko:K01494	ko00240,ko01100,map00240,map01100	M00053	R00568,R02325	RC00074	ko00000,ko00001,ko00002,ko01000			iPC815.YPO1525	Bacteria	1MV2J@1224,1RMCD@1236,41EEZ@629,COG0717@1,COG0717@2	NA|NA|NA	F	Belongs to the dCTP deaminase family	TIGRFAM, PANTHER, Hamap, SUPERFAMILY, PANTHER, Pfam, CDD, Gene3D	TIGR02274, PTHR42680:SF3, MF_00146, SSF51283, PTHR42680, PF00692, cd07557, G3DSA:2.70.40.10	dCTP_deam: deoxycytidine triphosphate deaminase, dCTP deaminase [dcd]., dUTPase, trimeric_dUTPase	IPR011962, IPR011962, IPR036157, IPR029054, IPR033704, IPR036157	dCTP deaminase, dCTP deaminase, dUTPase-like superfamily, dUTPase-like, dUTPase, trimeric, dUTPase-like superfamily	GO:0006229, GO:0008829, GO:0006229, GO:0008829,nan]
NZ_CP050969.1_191_41	701347.Entcl_1625	1.5e-96	359	Enterobacter	udk	GO:0003674,GO:0003824,GO:0004849,GO:0005575,GO:0005622,GO:0005623,GO:0005737,GO:0005829,GO:0006139,GO:0006206,GO:0006213,GO:0006220,GO:0006221,GO:0006222,GO:0006725,GO:0006753,GO:0006793,GO:0006796,GO:0006807,GO:0008150,GO:0008152,GO:0008655,GO:0009058,GO:0009112,GO:0009116,GO:0009117,GO:0009119,GO:0009123,GO:0009124,GO:0009129,GO:0009130,GO:0009156,GO:0009161,GO:0009163,GO:0009165,GO:0009173,GO:…	2.7.1.48	ko:K00876	ko00240,ko00983,ko01100,map00240,map00983,map01100		R00513,R00516,R00517,R00962,R00964,R00967,R00968,R00970,R01548,R01549,R01880,R02091,R02096,R02097,R02327,R02332,R02371,R02372,R08232	RC00002,RC00017	ko00000,ko00001,ko01000			iSBO_1134.SBO_0893	Bacteria	1MWCH@1224,1RNZG@1236,3WZZJ@547,COG0572@1,COG0572@2	NA|NA|NA	F	Cytidine monophosphokinase	PANTHER, Hamap, SUPERFAMILY, TIGRFAM, CDD, PRINTS, PRINTS, PRINTS, PRINTS, PRINTS, PRINTS, Gene3D, Pfam, PANTHER	PTHR10285:SF123, MF_00551, SSF52540, TIGR00235, cd02023, PR00988, PR00988, PR00988, PR00988, PR00988, PR00988, G3DSA:3.40.50.300, PF00485, PTHR10285	Uridine kinase [udk]., udk: uridine kinase, UMPK, Uridine kinase signature, Uridine kinase signature, Uridine kinase signature, Uridine kinase signature, Uridine kinase signature, Uridine kinase signature, Phosphoribulokinase / Uridine kinase family	IPR026008, IPR027417, IPR000764, IPR000764, IPR006083	Uridine kinase, P-loop containing nucleoside triphosphate hydrolase, Uridine kinase-like, Uridine kinase-like, Phosphoribulokinase/uridine kinase	GO:0004849, GO:0005524, GO:0016773, GO:0005524, GO:0016301	KEGG: 00240+2.7.1.48|KEGG: 00983+2.7.1.48|MetaCyc: PWY-7193, KEGG: 00240+2.7.1.48|KEGG: 00983+2.7.1.48|MetaCyc: PWY-7193|Reactome: R-HSA-73614, KEGG: 00240+2.7.1.48|KEGG: 00983+2.7.1.48|MetaCyc: PWY-7193|Reactome: R-HSA-73614, Reactome: R-HSA-73614
NZ_CP050969.1_191_42	667121.ET1_01_00350	1.4e-145	522.7	Gammaproteobacteria	mrp	GO:0005575,GO:0005622,GO:0005623,GO:0005737,GO:0005829,GO:0044424,GO:0044444,GO:0044464		ko:K03593					ko00000,ko03029,ko03036				Bacteria	1MU7R@1224,1RMJF@1236,COG0489@1,COG0489@2	NA|NA|NA	D	Binds and transfers iron-sulfur (Fe-S) clusters to target apoproteins. Can hydrolyze ATP	Hamap, CDD, ProSitePatterns, Gene3D, PANTHER, SUPERFAMILY, SUPERFAMILY, PANTHER, Pfam	MF_02040, cd02037, PS01215, G3DSA:3.40.50.300, PTHR42961:SF2, SSF52540, SSF117916, PTHR42961, PF10609	Iron-sulfur cluster carrier protein., MRP-like, Mrp family signature., NUBPL iron-transfer P-loop NTPase	IPR019591, IPR019591, IPR000808, IPR027417, IPR034904, IPR033756	Mrp/NBP35 ATP-binding protein, Mrp/NBP35 ATP-binding protein, Mrp, conserved site, P-loop containing nucleoside triphosphate hydrolase, Fe-S cluster assembly domain superfamily, Flagellum site-determining protein YlxH/ Fe-S cluster assembling factor NBP35	GO:0005524
NZ_CP050969.1_191_43	561230.PC1_1287	0	1147.1	Pectobacterium	metG	GO:0003674,GO:0003824,GO:0004812,GO:0004825,GO:0005488,GO:0005575,GO:0005622,GO:0005623,GO:0005737,GO:0005829,GO:0006082,GO:0006139,GO:0006399,GO:0006412,GO:0006418,GO:0006431,GO:0006518,GO:0006520,GO:0006725,GO:0006807,GO:0008150,GO:0008152,GO:0008270,GO:0009058,GO:0009059,GO:0009987,GO:0010467,GO:0016070,GO:0016874,GO:0016875,GO:0019538,GO:0019752,GO:0034641,GO:0034645,GO:0034660,GO:0043038,GO:…	6.1.1.10,6.1.1.20	ko:K01874,ko:K01890,ko:K06878	ko00450,ko00970,map00450,map00970	M00359,M00360	R03659,R03660,R04773	RC00055,RC00523	ko00000,ko00001,ko00002,ko01000,ko01007,ko03016			iEC042_1314.EC042_2346,iECUMN_1333.ECUMN_2446	Bacteria	1MRRJ@122277,1MUBY@1224,1RMYM@1236,COG0073@1,COG0073@2,COG0143@1,COG0143@2	NA|NA|NA	J	Is required not only for elongation of protein synthesis but also for the initiation of all mRNA translation through initiator tRNA(fMet) aminoacylation	PRINTS, PRINTS, PRINTS, PRINTS, PRINTS, PRINTS, Gene3D, CDD, TIGRFAM, SUPERFAMILY, PANTHER, Hamap, SUPERFAMILY, SUPERFAMILY, CDD, Gene3D, Coils, CDD, Pfam, Pfam, Gene3D, ProSiteProfiles, TIGRFAM, ProSitePatterns, Gene3D, SUPERFAMILY, PANTHER	PR01041, PR01041, PR01041, PR01041, PR01041, PR01041, G3DSA:3.40.50.620, cd02800, TIGR00398, SSF57770, PTHR11946, MF_00098, SSF47323, SSF50249, cd00814, G3DSA:2.20.28.20, Coil, cd07957, PF01588, PF09334, G3DSA:1.10.730.10, PS50886, TIGR00399, PS00178, G3DSA:2.40.50.140, SSF52374, PTHR11946:SF86	Methionyl-tRNA synthetase signature, Methionyl-tRNA synthetase signature, Methionyl-tRNA synthetase signature, Methionyl-tRNA synthetase signature, Methionyl-tRNA synthetase signature, Methionyl-tRNA synthetase signature, tRNA_bind_EcMetRS_like, metG: methionine--tRNA ligase, Methionine--tRNA ligase [metG]., MetRS_core, Anticodon_Ia_Met, Putative tRNA binding domain, tRNA synthetases class I (M),…	IPR033911, IPR033911, IPR033911, IPR033911, IPR033911, IPR033911, IPR014729, IPR004495, IPR014758, IPR029038, IPR023458, IPR009080, IPR012340, IPR033911, IPR029038, IPR002547, IPR015413, IPR002547, IPR004495, IPR001412	Methioninyl-tRNA synthetase core domain, Methioninyl-tRNA synthetase core domain, Methioninyl-tRNA synthetase core domain, Methioninyl-tRNA synthetase core domain, Methioninyl-tRNA synthetase core domain, Methioninyl-tRNA synthetase core domain, Rossmann-like alpha/beta/alpha sandwich fold, Methionyl-tRNA synthetase, beta subunit, C-terminal, Methionyl-tRNA synthetase, Methionyl-tRNA synthetase, …	GO:0004825, GO:0006431, GO:0004825, GO:0006431, GO:0004825, GO:0006431, GO:0004825, GO:0006431, GO:0004825, GO:0006431, GO:0004825, GO:0006431, GO:0000166, GO:0004825, GO:0005524, GO:0005737, GO:0006431, GO:0000166, GO:0004825, GO:0005524, GO:0005737, GO:0006431, GO:0004825, GO:0000166, GO:0004812, GO:0005524, GO:0006418, GO:0004825, GO:0006431, GO:0000049, GO:0000166, GO:0004812, GO:0005524, GO:…	KEGG: 00450+6.1.1.10|KEGG: 00970+6.1.1.10, KEGG: 00450+6.1.1.10|KEGG: 00970+6.1.1.10, KEGG: 00450+6.1.1.10|KEGG: 00970+6.1.1.10, KEGG: 00450+6.1.1.10|KEGG: 00970+6.1.1.10, KEGG: 00450+6.1.1.10|KEGG: 00970+6.1.1.10, KEGG: 00450+6.1.1.10|KEGG: 00970+6.1.1.10, KEGG: 00450+6.1.1.10|KEGG: 00970+6.1.1.10, KEGG: 00450+6.1.1.10|KEGG: 00970+6.1.1.10, KEGG: 00450+6.1.1.10|KEGG: 00970+6.1.1.10|Reactome: R-H…
NZ_CP050969.1_191_44	1028805.GGC_1057	8.5e-99	367.1	Pasteurellales	hprA		1.1.1.29,1.1.1.399,1.1.1.95	ko:K00018,ko:K00058	ko00260,ko00630,ko00680,ko01100,ko01110,ko01120,ko01130,ko01200,ko01230,map00260,map00630,map00680,map01100,map01110,map01120,map01130,map01200,map01230	M00020,M00346	R00717,R01388,R01513	RC00031,RC00042	ko00000,ko00001,ko00002,ko01000,ko04147				Bacteria	1MU2D@1224,1RPM1@1236,1Y6VT@135625,COG1052@1,COG1052@2	NA|NA|NA	C	Belongs to the D-isomer specific 2-hydroxyacid dehydrogenase family	Pfam, Gene3D, ProSitePatterns, CDD, ProSitePatterns, Pfam, Gene3D, SUPERFAMILY, SUPERFAMILY, PANTHER	PF00389, G3DSA:3.40.50.720, PS00670, cd12162, PS00671, PF02826, G3DSA:3.40.50.720, SSF52283, SSF51735, PTHR43761	D-isomer specific 2-hydroxyacid dehydrogenase, catalytic domain, D-isomer specific 2-hydroxyacid dehydrogenases signature 2., 2-Hacid_dh_4, D-isomer specific 2-hydroxyacid dehydrogenases signature 3., D-isomer specific 2-hydroxyacid dehydrogenase, NAD binding domain, nan]	IPR006139, IPR029753, IPR029753, IPR006140, IPR036291	D-isomer specific 2-hydroxyacid dehydrogenase, catalytic domain, D-isomer specific 2-hydroxyacid dehydrogenase, NAD-binding domain conserved site, D-isomer specific 2-hydroxyacid dehydrogenase, NAD-binding domain conserved site, D-isomer specific 2-hydroxyacid dehydrogenase, NAD-binding domain, NAD(P)-binding domain superfamily	GO:0016616, GO:0051287, GO:0055114,GO:0051287, GO:0055114, nan]
NZ_CP050969.1_191_45	384765.SIAM614_29551	3.6e-14	85.1	Alphaproteobacteria	rubA	GO:0003674,GO:0003824,GO:0005488,GO:0005506,GO:0006091,GO:0008150,GO:0008152,GO:0008199,GO:0009055,GO:0009987,GO:0016491,GO:0022900,GO:0043167,GO:0043169,GO:0044237,GO:0046872,GO:0046914,GO:0055114											Bacteria	1N813@1224,2U0HG@28211,COG1773@1,COG1773@2	NA|NA|NA	C	[NiFe]-hydrogenase assembly, chaperone, HybE	TIGRFAM, ProDom, Gene3D, Pfam	TIGR03993, PD008308, G3DSA:3.30.1460.40, PF11939	hydrog_HybE: [NiFe] hydrogenase assembly chaperone, HybE family, HUPJ HYDROGENASE EXPRESSION/FORMATION HYDROGENASE-2 HYBE COMPONENT OPERON ELECTRON METAL-BINDING IRON, [NiFe]-hydrogenase assembly, chaperone, HybE	IPR023994, IPR023994, IPR038530, IPR023994	[NiFe]-hydrogenase assembly, chaperone, HybE, [NiFe]-hydrogenase assembly, chaperone, HybE, [NiFe]-hydrogenase assembly, chaperone, HybE superfamily, [NiFe]-hydrogenase assembly, chaperone, HybE
NZ_CP050969.1_191_46	1192124.LIG30_1253	6.8e-19	99.4	Burkholderiaceae	rubA	GO:0003674,GO:0003824,GO:0005488,GO:0005506,GO:0006091,GO:0008150,GO:0008152,GO:0008199,GO:0009055,GO:0009987,GO:0016491,GO:0022900,GO:0043167,GO:0043169,GO:0044237,GO:0046872,GO:0046914,GO:0055114											Bacteria	1K9A5@119060,1N6TQ@1224,2VWD0@28216,COG1773@1,COG1773@2	NA|NA|NA	C	Rubredoxin	Pfam, PRINTS, PRINTS, ProSitePatterns, CDD, ProSiteProfiles, PANTHER, SUPERFAMILY, Gene3D	PF00301, PR00163, PR00163, PS00202, cd00730, PS50903, PTHR44922, SSF57802, G3DSA:2.20.28.10	Rubredoxin, Rubredoxin signature, Rubredoxin signature, Rubredoxin signature., rubredoxin, Rubredoxin-like domain profile.	IPR024935, IPR024935, IPR024935, IPR018527, IPR024935, IPR024934	Rubredoxin domain, Rubredoxin domain, Rubredoxin domain, Rubredoxin, iron-binding site, Rubredoxin domain, Rubredoxin-like domain	GO:0005506, GO:0005506, GO:0005506, GO:0046872, GO:0005506, GO:0005506
NZ_CP050969.1_191_47	1216966.BAUC01000032_gene2762	7.9e-64	250.8	Gammaproteobacteria	hyaF			ko:K03618					ko00000				Bacteria	1MV2U@1224,1S2ZY@1236,COG1773@1,COG1773@2	NA|NA|NA	C	PFAM HupH hydrogenase expression protein, C-terminal conserved region	ProDom, ProDom, Pfam, Pfam, Gene3D, Gene3D	PD005668, PD005668, PF04809, PF04809, G3DSA:3.30.1370.140, G3DSA:3.30.1370.140	HYDROGENASE HUPH HYDROGENASE-1 EXPRESSION/FORMATION OPERON PROTEIN C-TERMINAL EXPRESSION HYAF HOXQ, HYDROGENASE HUPH HYDROGENASE-1 EXPRESSION/FORMATION OPERON PROTEIN C-TERMINAL EXPRESSION HYAF HOXQ, HupH hydrogenase expression protein, C-terminal conserved region, HupH hydrogenase expression protein, C-terminal conserved region	IPR006894, IPR006894, IPR006894, IPR006894, IPR038527, IPR038527	HupH hydrogenase expression protein, C-terminal, HupH hydrogenase expression protein, C-terminal, HupH hydrogenase expression protein, C-terminal, HupH hydrogenase expression protein, C-terminal, HupH, C-terminal domain superfamily, HupH, C-terminal domain superfamily
NZ_CP050969.1_191_48	90371.CY43_09145	5.3e-24	117.5	Salmonella	senC	GO:0000041,GO:0003674,GO:0003824,GO:0004601,GO:0005048,GO:0005488,GO:0005507,GO:0005575,GO:0005622,GO:0005623,GO:0005737,GO:0005739,GO:0005740,GO:0005743,GO:0006810,GO:0006811,GO:0006812,GO:0006825,GO:0008150,GO:0008152,GO:0008379,GO:0009636,GO:0009987,GO:0016020,GO:0016043,GO:0016209,GO:0016491,GO:0016684,GO:0019866,GO:0022607,GO:0030001,GO:0031090,GO:0031966,GO:0031967,GO:0031975,GO:0033218,GO:…		ko:K03619,ko:K07152					ko00000,ko03029				Bacteria	1RKWY@1224,1S7Q1@1236,3ZM6J@590,COG1999@1,COG1999@2	NA|NA|NA	S	Hydrogenase-1 expression protein HyaE	Gene3D, SUPERFAMILY, Pfam	G3DSA:3.40.30.10, SSF52833, PF07449	Hydrogenase-1 expression protein HyaE	IPR036249, IPR010893	Thioredoxin-like superfamily, [NiFe]-hydrogenase maturation factor HyaE
NZ_CP050969.1_191_49	1216966.BAUC01000032_gene2764	6.1e-61	240.7	Gammaproteobacteria	hyaD	GO:0003674,GO:0003824,GO:0004175,GO:0006464,GO:0006508,GO:0006807,GO:0008150,GO:0008152,GO:0008233,GO:0009987,GO:0010467,GO:0016485,GO:0016787,GO:0019538,GO:0036211,GO:0043170,GO:0043412,GO:0044237,GO:0044238,GO:0044260,GO:0044267,GO:0051604,GO:0070011,GO:0071704,GO:0140096,GO:1901564	3.4.23.51	ko:K03605,ko:K08315					ko00000,ko01000,ko01002				Bacteria	1RE1C@1224,1S1V0@1236,COG0680@1,COG0680@2	NA|NA|NA	C	of HyaB (the large subunit of hydrogenase 1)	Gene3D, TIGRFAM, CDD, SUPERFAMILY, Pfam, TIGRFAM, PANTHER, PANTHER, MobiDBLite, PRINTS, PRINTS, PRINTS, PRINTS, PRINTS	G3DSA:3.40.50.1450, TIGR00072, cd06062, SSF53163, PF01750, TIGR00140, PTHR30302:SF6, PTHR30302, mobidb-lite, PR00446, PR00446, PR00446, PR00446, PR00446	hydrog_prot: hydrogenase maturation protease, H2MP_MemB-H2up, Hydrogenase maturation protease, hupD: hydrogenase expression/formation protein, consensus disorder prediction, Hydrogen uptake protein signature, Hydrogen uptake protein signature, Hydrogen uptake protein signature, Hydrogen uptake protein signature, Hydrogen uptake protein signature	IPR023430, IPR000671, IPR023430, IPR000671, IPR004419, IPR000671, IPR000671, IPR000671, IPR000671, IPR000671, IPR000671	Peptidase HybD-like domain superfamily, Peptidase A31 family, Peptidase HybD-like domain superfamily, Peptidase A31 family, Peptidase A31, hydrogenase expression/formation protein, Peptidase A31 family, Peptidase A31 family, Peptidase A31 family, Peptidase A31 family, Peptidase A31 family, Peptidase A31 family	GO:0008047, GO:0008233, GO:0008047, GO:0008233, GO:0016485, GO:0046872, GO:0008047, GO:0008233, GO:0008047, GO:0008233, GO:0008047, GO:0008233, GO:0008047, GO:0008233, GO:0008047, GO:0008233, GO:0008047, GO:0008233
NZ_CP050969.1_191_5	1286170.RORB6_09090	7.5e-137	493.8	Gammaproteobacteria	lolC	GO:0005575,GO:0005623,GO:0005886,GO:0008104,GO:0008150,GO:0016020,GO:0032991,GO:0033036,GO:0034613,GO:0044425,GO:0044459,GO:0044464,GO:0044872,GO:0044873,GO:0044874,GO:0051179,GO:0051641,GO:0070727,GO:0071944,GO:0072657,GO:0089705,GO:0098796,GO:0098797,GO:1990778		ko:K02004,ko:K09808	ko02010,map02010	M00255,M00258			ko00000,ko00001,ko00002,ko02000	3.A.1,3.A.1.125			Bacteria	1MVV7@1224,1RMP9@1236,COG4591@1,COG4591@2	NA|NA|NA	M	Lipoprotein releasing system transmembrane protein	TIGRFAM, Pfam, PANTHER, Pfam, PANTHER	TIGR02212, PF02687, PTHR30489:SF8, PF12704, PTHR30489	lolCE: lipoprotein releasing system, transmembrane protein, LolC/E family, FtsX-like permease family, MacB-like periplasmic core domain	IPR011925, IPR003838, IPR025857	Lipoprotein-releasing system transmembrane protein LolC/E, ABC transporter permease protein domain, MacB-like periplasmic core domain	GO:0016021, GO:0042953, GO:0042954, GO:0016020
NZ_CP050969.1_191_50	155864.EDL933_1312	4.1e-97	361.3	Escherichia	cybH	GO:0003674,GO:0005488,GO:0005575,GO:0005623,GO:0005886,GO:0005887,GO:0006091,GO:0006113,GO:0008150,GO:0008152,GO:0009061,GO:0009987,GO:0015980,GO:0016020,GO:0016021,GO:0020037,GO:0031224,GO:0031226,GO:0032991,GO:0044237,GO:0044425,GO:0044459,GO:0044464,GO:0044569,GO:0045333,GO:0046906,GO:0048037,GO:0055114,GO:0071944,GO:0097159,GO:1901363,GO:1902494		ko:K03620	ko02020,map02020				ko00000,ko00001				Bacteria	1MU87@1224,1RNTH@1236,3XN5T@561,COG1969@1,COG1969@2	NA|NA|NA	C	Ni Fe-hydrogenase 1 B-type cytochrome subunit	PANTHER, Pfam, Gene3D, PRINTS, PRINTS, PRINTS, PRINTS, PRINTS, SUPERFAMILY, PANTHER, MobiDBLite, MobiDBLite, TIGRFAM, ProSitePatterns	PTHR30485, PF01292, G3DSA:1.20.950.20, PR00161, PR00161, PR00161, PR00161, PR00161, SSF81342, PTHR30485:SF0, mobidb-lite, mobidb-lite, TIGR02125, PS00883	Prokaryotic cytochrome b561, Nickel-dependent hydrogenase/B-type cytochrome signature, Nickel-dependent hydrogenase/B-type cytochrome signature, Nickel-dependent hydrogenase/B-type cytochrome signature, Nickel-dependent hydrogenase/B-type cytochrome signature, Nickel-dependent hydrogenase/B-type cytochrome signature, consensus disorder prediction, consensus disorder prediction, CytB-hydogenase: N…	IPR011577, IPR000516, IPR000516, IPR000516, IPR000516, IPR000516, IPR016174, IPR000516, IPR000516	Cytochrome b561, bacterial/Ni-hydrogenase, Nickel-dependent hydrogenase b-type cytochrome subunit, Nickel-dependent hydrogenase b-type cytochrome subunit, Nickel-dependent hydrogenase b-type cytochrome subunit, Nickel-dependent hydrogenase b-type cytochrome subunit, Nickel-dependent hydrogenase b-type cytochrome subunit, Di-haem cytochrome, transmembrane, Nickel-dependent hydrogenase b-type cytoc…	GO:0009055, GO:0016021, GO:0005506, GO:0009055, GO:0016021, GO:0005506, GO:0009055, GO:0016021, GO:0005506, GO:0009055, GO:0016021, GO:0005506, GO:0009055, GO:0016021, GO:0005506, GO:0009055, GO:0016021, GO:0016020, GO:0022904, GO:0005506, GO:0009055, GO:0016021, GO:0005506, GO:0009055, GO:0016021	Reactome: R-HSA-611105,nan]
NZ_CP050969.1_191_51	362663.ECP_0978	0	1099.7	Escherichia	hyaB	GO:0003674,GO:0003824,GO:0005488,GO:0005575,GO:0005623,GO:0005886,GO:0006091,GO:0006113,GO:0008150,GO:0008152,GO:0009055,GO:0009061,GO:0009987,GO:0015980,GO:0016020,GO:0016151,GO:0016491,GO:0022900,GO:0030288,GO:0030313,GO:0031975,GO:0032991,GO:0042597,GO:0043167,GO:0043169,GO:0044237,GO:0044464,GO:0044569,GO:0045333,GO:0046872,GO:0046914,GO:0055114,GO:0071944,GO:1902494	1.12.99.6	ko:K06281	ko00633,ko01120,map00633,map01120		R08034	RC00250	ko00000,ko00001,ko01000			iSbBS512_1146.SbBS512_E2342,ic_1306.c3731	Bacteria	1MWFJ@1224,1RMC3@1236,3XP0G@561,COG0374@1,COG0374@2	NA|NA|NA	C	Belongs to the NiFe NiFeSe hydrogenase large subunit family	PANTHER, SUPERFAMILY, Pfam, PANTHER, ProSitePatterns, ProSitePatterns, Gene3D	PTHR42958:SF3, SSF56762, PF00374, PTHR42958, PS00508, PS00507, G3DSA:1.10.645.10	Nickel-dependent hydrogenase, Nickel-dependent hydrogenases large subunit signature 2., Nickel-dependent hydrogenases large subunit signature 1.	IPR029014, IPR001501, IPR018194, IPR018194, IPR029014	[NiFe]-hydrogenase, large subunit, Nickel-dependent hydrogenase, large subunit, Nickel-dependent hydrogenase, large subunit, nickel binding site, Nickel-dependent hydrogenase, large subunit, nickel binding site, [NiFe]-hydrogenase, large subunit	GO:0016151, GO:0008901, GO:0016151, GO:0055114, GO:0008901, GO:0016151, GO:0055114	Reactome: R-HSA-611105|Reactome: R-HSA-6799198,Reactome: R-HSA-611105|Reactome: R-HSA-6799198
NZ_CP050969.1_191_52	198214.SF0973	3.1e-177	627.9	Gammaproteobacteria	hyaA	GO:0003674,GO:0003824,GO:0005488,GO:0005575,GO:0005623,GO:0005886,GO:0006091,GO:0006113,GO:0008150,GO:0008152,GO:0009055,GO:0009061,GO:0009897,GO:0009986,GO:0009987,GO:0015980,GO:0016020,GO:0016021,GO:0016491,GO:0022900,GO:0031224,GO:0031226,GO:0031233,GO:0031237,GO:0032991,GO:0044237,GO:0044425,GO:0044459,GO:0044464,GO:0044569,GO:0045333,GO:0048037,GO:0051536,GO:0051538,GO:0051539,GO:0051540,GO:…	1.12.99.6	ko:K06282	ko00633,ko01120,map00633,map01120		R08034	RC00250	ko00000,ko00001,ko01000			iAPECO1_1312.APECO1_76,iUTI89_1310.UTI89_C1040	Bacteria	1MWAC@1224,1RNTJ@1236,COG1740@1,COG1740@2	NA|NA|NA	C	small subunit	SUPERFAMILY, Gene3D, Pfam, TIGRFAM, Pfam, Gene3D, PANTHER, PRINTS, PRINTS, PRINTS, PRINTS, PRINTS, PRINTS, PRINTS, PRINTS, PRINTS, ProSiteProfiles, PIRSF, TIGRFAM, PANTHER	SSF56770, G3DSA:3.40.50.700, PF01058, TIGR01409, PF14720, G3DSA:4.10.480.10, PTHR30013, PR00614, PR00614, PR00614, PR00614, PR00614, PR00614, PR00614, PR00614, PR00614, PS51318, PIRSF000310, TIGR00391, PTHR30013:SF6	NADH ubiquinone oxidoreductase, 20 Kd subunit, TAT_signal_seq: Tat (twin-arginine translocation) pathway signal sequence, NiFe/NiFeSe hydrogenase small subunit C-terminal, Ni-Fe hydrogenase small subunit signature, Ni-Fe hydrogenase small subunit signature, Ni-Fe hydrogenase small subunit signature, Ni-Fe hydrogenase small subunit signature, Ni-Fe hydrogenase small subunit signature, Ni-Fe hydrog…	IPR037024, IPR006137, IPR019546, IPR027394, IPR037148, IPR001821,IPR006311, IPR001821, IPR001821	[NiFe]-hydrogenase, small subunit, N-terminal domain superfamily, NADH:ubiquinone oxidoreductase-like, 20kDa subunit, Twin-arginine translocation pathway, signal sequence, bacterial/archaeal, Cytochrome-c3 hydrogenase, C-terminal, [NiFe]-hydrogenase, small subunit, C-terminal domain superfamily, [NiFe]-hydrogenase, small subunit,Twin-arginine translocation pathway, signal sequence, [NiFe]-hydroge…	GO:0051536, GO:0055114, GO:0008901, GO:0009375, GO:0051536, GO:0055114, GO:0008901, GO:0009375, GO:0051536, GO:0055114, GO:0008901, GO:0009375, GO:0051536, GO:0055114	Reactome: R-HSA-611105|Reactome: R-HSA-6799198
NZ_CP050969.1_191_53	399742.Ent638_0545	1.4e-128	466.1	Enterobacter	lplA	GO:0003674,GO:0003824,GO:0005575,GO:0005622,GO:0005623,GO:0005737,GO:0005829,GO:0006082,GO:0006464,GO:0006629,GO:0006631,GO:0006633,GO:0006732,GO:0006790,GO:0006807,GO:0008150,GO:0008152,GO:0008610,GO:0009058,GO:0009106,GO:0009107,GO:0009108,GO:0009249,GO:0009987,GO:0010467,GO:0016053,GO:0016740,GO:0016746,GO:0016747,GO:0016772,GO:0016779,GO:0016874,GO:0016879,GO:0016979,GO:0017118,GO:0018065,GO:…	6.3.1.20	ko:K03800	ko00785,ko01100,map00785,map01100		R07770,R07771,R11143	RC00043,RC00070,RC00090,RC00992,RC02896	ko00000,ko00001,ko01000			iBWG_1329.BWG_4078,iE2348C_1286.E2348C_4684,iECDH10B_1368.ECDH10B_4544,iECDH1ME8569_1439.ECDH1ME8569_4242,iEcDH1_1363.EcDH1_3612,iJO1366.b4386,iSDY_1059.SDY_4647,iY75_1357.Y75_RS22890	Bacteria	1N1T8@1224,1RMGI@1236,3X1Y7@547,COG0095@1,COG0095@2	NA|NA|NA	H	Catalyzes both the ATP-dependent activation of exogenously supplied lipoate to lipoyl-AMP and the transfer of the activated lipoyl onto the lipoyl domains of lipoate-dependent enzymes	Gene3D, Pfam, CDD, Gene3D, TIGRFAM, PANTHER, Pfam, PANTHER, SUPERFAMILY, ProSiteProfiles, SUPERFAMILY	G3DSA:3.30.930.10, PF03099, cd16443, G3DSA:3.30.390.50, TIGR00545, PTHR12561, PF10437, PTHR12561:SF5, SSF55681, PS51733, SSF82649	Biotin/lipoate A/B protein ligase family, LplA, lipoyltrans: lipoyltransferase and lipoate-protein ligase, Bacterial lipoate protein ligase C-terminus, Biotinyl protein ligase (BPL) and lipoyl protein ligase (LPL) catalytic domain profile.	IPR004143, IPR004562, IPR004562, IPR019491, IPR023741, IPR004143	Biotinyl protein ligase (BPL) and lipoyl protein ligase (LPL), catalytic domain, Lipoyltransferase/lipoate-protein ligase, Lipoyltransferase/lipoate-protein ligase, Lipoate protein ligase, C-terminal, Lipoate-protein ligase A, Biotinyl protein ligase (BPL) and lipoyl protein ligase (LPL), catalytic domain	GO:0006464, GO:0009249, GO:0009249, GO:0009249, GO:0016979, GO:0006464	KEGG: 00785+2.3.1.181|MetaCyc: PWY-6987|MetaCyc: PWY-7382, KEGG: 00785+6.3.1.20|Reactome: R-HSA-389661, KEGG: 00785+6.3.1.20|Reactome: R-HSA-389661, KEGG: 00785+6.3.1.20, KEGG: 00785+6.3.1.20, KEGG: 00785+2.3.1.181|MetaCyc: PWY-6987|MetaCyc: PWY-7382
NZ_CP050969.1_191_54	1229172.JQFA01000002_gene2574	4.4e-90	337.8	Oscillatoriales													Bacteria	1G6HJ@1117,1HFJ2@1150,COG1028@1,COG1028@2	NA|NA|NA	IQ	Enoyl-(Acyl carrier protein) reductase	Pfam, Gene3D, PRINTS, PRINTS, PRINTS, SUPERFAMILY, ProSitePatterns, PRINTS, PRINTS, PRINTS, PRINTS, PRINTS, PRINTS, PANTHER, PANTHER	PF13561, G3DSA:3.40.50.720, PR00080, PR00080, PR00080, SSF51735, PS00061, PR00081, PR00081, PR00081, PR00081, PR00081, PR00081, PTHR24321:SF7, PTHR24321	Enoyl-(Acyl carrier protein) reductase, Short-chain dehydrogenase/reductase (SDR) superfamily signature, Short-chain dehydrogenase/reductase (SDR) superfamily signature, Short-chain dehydrogenase/reductase (SDR) superfamily signature, Short-chain dehydrogenases/reductases family signature., Glucose/ribitol dehydrogenase family signature, Glucose/ribitol dehydrogenase family signature, Glucose/rib…	IPR002347, IPR002347, IPR002347, IPR036291, IPR020904, IPR002347, IPR002347, IPR002347, IPR002347, IPR002347, IPR002347	Short-chain dehydrogenase/reductase SDR, Short-chain dehydrogenase/reductase SDR, Short-chain dehydrogenase/reductase SDR, NAD(P)-binding domain superfamily, Short-chain dehydrogenase/reductase, conserved site, Short-chain dehydrogenase/reductase SDR, Short-chain dehydrogenase/reductase SDR, Short-chain dehydrogenase/reductase SDR, Short-chain dehydrogenase/reductase SDR, Short-chain dehydrogenas…	GO:0016491
NZ_CP050969.1_191_55	911008.GLAD_03911	1.1e-37	163.3	Gammaproteobacteria	ymbA	GO:0003674,GO:0005488,GO:0005515,GO:0005575,GO:0005623,GO:0009279,GO:0016020,GO:0019867,GO:0030288,GO:0030312,GO:0030313,GO:0031224,GO:0031225,GO:0031230,GO:0031241,GO:0031246,GO:0031975,GO:0036405,GO:0036406,GO:0042597,GO:0042802,GO:0044425,GO:0044462,GO:0044464,GO:0071944,GO:0098552		ko:K09857					ko00000				Bacteria	1PJIN@1224,1RQTB@1236,COG3009@1,COG3009@2	NA|NA|NA	S	protein conserved in bacteria	SUPERFAMILY, Gene3D, Pfam, ProSiteProfiles	SSF159594, G3DSA:3.40.50.10610, PF03886, PS51257	ABC-type transport auxiliary lipoprotein component, Prokaryotic membrane lipoprotein lipid attachment site profile.	IPR005586	ABC-type transport auxiliary lipoprotein component
NZ_CP050969.1_191_56	506534.Rhein_0569	1.5e-151	543.1	Chromatiales	pqiB	GO:0003674,GO:0005488,GO:0005515,GO:0005575,GO:0005623,GO:0006810,GO:0006869,GO:0008150,GO:0009987,GO:0010876,GO:0016043,GO:0030288,GO:0030313,GO:0031975,GO:0033036,GO:0042597,GO:0042802,GO:0044464,GO:0051179,GO:0051234,GO:0061024,GO:0071702,GO:0071840,GO:0120009		ko:K02067,ko:K06192	ko02010,map02010	M00210,M00669,M00670			ko00000,ko00001,ko00002,ko02000	3.A.1.27			Bacteria	1MU1T@1224,1RN89@1236,1WWQS@135613,COG1463@1,COG1463@2,COG3008@1,COG3008@2	NA|NA|NA	Q	PFAM Mammalian cell entry related	Pfam, Pfam, Pfam, PANTHER, PANTHER	PF02470, PF02470, PF02470, PTHR30462:SF2, PTHR30462	MlaD protein, MlaD protein, MlaD protein	IPR003399, IPR003399, IPR003399	Mce/MlaD, Mce/MlaD, Mce/MlaD
NZ_CP050969.1_191_57	406817.XNC1_1596	2.9e-112	412.1	Gammaproteobacteria	pqiA	GO:0005575,GO:0005623,GO:0005886,GO:0005887,GO:0016020,GO:0016021,GO:0031224,GO:0031226,GO:0044425,GO:0044459,GO:0044464,GO:0071944		ko:K03808					ko00000				Bacteria	1MWG1@1224,1RM9Z@1236,COG2995@1,COG2995@2	NA|NA|NA	S	paraquat-inducible protein A	PANTHER, TIGRFAM, PANTHER, Pfam, Pfam	PTHR30462:SF3, TIGR00155, PTHR30462, PF04403, PF04403	pqiA_fam: integral membrane protein, PqiA family, Paraquat-inducible protein A, Paraquat-inducible protein A	IPR005219, IPR007498, IPR007498	Intermembrane transport protein PqiA-like, Enterobacteria-type, Intermembrane transport protein PqiA-like, Intermembrane transport protein PqiA-like
NZ_CP050969.1_191_58	1216966.BAUC01000050_gene77	9.3e-100	369.8	Gammaproteobacteria	narI	GO:0001666,GO:0003674,GO:0003824,GO:0005488,GO:0005575,GO:0005623,GO:0005886,GO:0006091,GO:0006950,GO:0008150,GO:0008152,GO:0008940,GO:0009055,GO:0009061,GO:0009628,GO:0009987,GO:0015980,GO:0016020,GO:0016491,GO:0016661,GO:0019645,GO:0020037,GO:0022900,GO:0022904,GO:0036293,GO:0044237,GO:0044464,GO:0045333,GO:0046906,GO:0048037,GO:0050896,GO:0055114,GO:0070482,GO:0071944,GO:0097159,GO:1901363	1.7.5.1	ko:K00370,ko:K00374,ko:K02575	ko00910,ko01120,ko02020,map00910,map01120,map02020	M00529,M00530,M00615,M00804	R00798,R01106,R09497	RC02812	ko00000,ko00001,ko00002,ko01000,ko02000	2.A.1.8,5.A.3.1		iNJ661.Rv1164	Bacteria	1MXGZ@1224,1RPTD@1236,COG2181@1,COG2181@2	NA|NA|NA	C	nitrate reductase, gamma subunit	PANTHER, SUPERFAMILY, Pfam, Gene3D, TIGRFAM	PTHR30598, SSF103501, PF02665, G3DSA:1.20.950.20, TIGR00351	Nitrate reductase gamma subunit, narI: respiratory nitrate reductase, gamma subunit	IPR036197, IPR023234, IPR003816	NarG-like superfamily, NarG-like domain, Nitrate reductase, gamma subunit	GO:0008940, GO:0009325, GO:0055114
NZ_CP050969.1_191_59	667121.ET1_23_00070	2.6e-57	228.8	Gammaproteobacteria	narJ	GO:0001666,GO:0003674,GO:0005575,GO:0005622,GO:0005623,GO:0005737,GO:0006082,GO:0006807,GO:0006950,GO:0008150,GO:0008152,GO:0009628,GO:0009987,GO:0016043,GO:0016530,GO:0022607,GO:0034622,GO:0036293,GO:0042126,GO:0042128,GO:0043436,GO:0043933,GO:0044085,GO:0044237,GO:0044281,GO:0044424,GO:0044464,GO:0050896,GO:0051131,GO:0065003,GO:0070482,GO:0071704,GO:0071840,GO:0071941,GO:0140104,GO:2001057	1.7.5.1	ko:K00370,ko:K00373,ko:K17052	ko00910,ko01120,ko02020,map00910,map01120,map02020	M00529,M00530,M00804	R00798,R01106,R09497	RC02812	ko00000,ko00001,ko00002,ko01000,ko02000	5.A.3.1,5.A.3.8		iE2348C_1286.E2348C_1350,iECABU_c1320.ECABU_c15020,iECIAI1_1343.ECIAI1_1469,iECO103_1326.ECO103_1331,iECO111_1330.ECO111_1557,iECW_1372.ECW_m1594,iEKO11_1354.EKO11_2354,iLF82_1304.LF82_1462,iNRG857_1313.NRG857_06280,iSSON_1240.SSON_1659,iWFL_1372.ECW_m1594,iYO844.BSU37260,ic_1306.c1687	Bacteria	1MY4E@1224,1RQ23@1236,COG2180@1,COG2180@2	NA|NA|NA	C	Nitrate reductase	TIGRFAM, SUPERFAMILY, Gene3D, Coils, Pfam, Gene3D, PANTHER	TIGR00684, SSF89155, G3DSA:1.20.120.700, Coil, PF02613, G3DSA:1.10.4070.10, PTHR43680	narJ: nitrate reductase molybdenum cofactor assembly chaperone, Nitrate reductase delta subunit	IPR003765, IPR036411, IPR020945, IPR003765	Nitrate reductase chaperone, NarJ, TorD-like superfamily, DMSO/Nitrate reductase chaperone, Nitrate reductase chaperone, NarJ	GO:0051082, GO:0051131, GO:0051082, GO:0051131
NZ_CP050969.1_191_6	1120963.KB894496_gene2708	4.3e-34	151.4	Pseudoalteromonadaceae	VV12079												Bacteria	1MZN3@1224,1S9S8@1236,2CHGH@1,2Q27C@267888,32S61@2	NA|NA|NA			Pfam	PF07238	PilZ domain	IPR009875	PilZ domain	GO:0035438
NZ_CP050969.1_191_60	667121.ET1_23_00060	2.1e-253	881.3	Gammaproteobacteria	narH		1.7.5.1	ko:K00371	ko00910,ko01120,ko02020,map00910,map01120,map02020	M00529,M00530,M00804	R00798,R01106,R09497	RC02812	ko00000,ko00001,ko00002,ko01000	5.A.3.1		iAF987.Gmet_1021	Bacteria	1MW9Q@1224,1RNMJ@1236,COG1140@1,COG1140@2	NA|NA|NA	C	nitrate reductase beta subunit	SUPERFAMILY, Gene3D, PANTHER, ProSiteProfiles, Gene3D, Pfam, Pfam, ProSiteProfiles, PANTHER, TIGRFAM, ProSiteProfiles	SSF54862, G3DSA:1.10.3650.10, PTHR43518:SF1, PS51379, G3DSA:3.30.70.20, PF14711, PF13247, PS51379, PTHR43518, TIGR01660, PS51379	4Fe-4S ferredoxin-type iron-sulfur binding domain profile., Respiratory nitrate reductase beta C-terminal, 4Fe-4S dicluster domain, 4Fe-4S ferredoxin-type iron-sulfur binding domain profile., narH: nitrate reductase, beta subunit, 4Fe-4S ferredoxin-type iron-sulfur binding domain profile.	IPR038262, IPR017896, IPR029263, IPR017896, IPR017896, IPR006547, IPR017896	Nitrate reductase beta, C-terminal domain superfamily, 4Fe-4S ferredoxin-type, iron-sulphur binding domain, Respiratory nitrate reductase beta, C-terminal, 4Fe-4S ferredoxin-type, iron-sulphur binding domain, 4Fe-4S ferredoxin-type, iron-sulphur binding domain, Nitrate reductase, beta subunit, 4Fe-4S ferredoxin-type, iron-sulphur binding domain	GO:0008940, GO:0009325, GO:0042126, GO:0055114	KEGG: 00910+1.7.5.1|MetaCyc: PWY-6748, KEGG: 00910+1.7.5.1|MetaCyc: PWY-6748, KEGG: 00910+1.7.5.1|MetaCyc: PWY-6748
NZ_CP050969.1_191_61	667121.ET1_23_00050	0	2084.3	Gammaproteobacteria	narG	GO:0005575,GO:0005623,GO:0005886,GO:0016020,GO:0044464,GO:0071944	1.7.5.1	ko:K00370,ko:K17050	ko00910,ko01120,ko02020,map00910,map01120,map02020	M00529,M00530,M00804	R00798,R01106,R09497	RC02812	ko00000,ko00001,ko00002,ko01000,ko02000	5.A.3.1,5.A.3.8			Bacteria	1MW9S@1224,1RQ27@1236,COG5013@1,COG5013@2	NA|NA|NA	C	Belongs to the prokaryotic molybdopterin-containing oxidoreductase family	ProSiteProfiles, Pfam, ProSitePatterns, ProSitePatterns, SUPERFAMILY, CDD, PANTHER, ProSitePatterns, SMART, Gene3D, CDD, SUPERFAMILY, PANTHER, Pfam, TIGRFAM, Pfam	PS51669, PF01568, PS00490, PS00551, SSF53706, cd02776, PTHR43105:SF2, PS00932, SM00926, G3DSA:3.40.50.12440, cd02750, SSF50692, PTHR43105, PF00384, TIGR01580, PF14710	Prokaryotic molybdopterin oxidoreductases 4Fe-4S domain profile., Molydopterin dinucleotide binding domain, Prokaryotic molybdopterin oxidoreductases signature 2., Prokaryotic molybdopterin oxidoreductases signature 1., MopB_CT_Nitrate-R-NarG-like, Prokaryotic molybdopterin oxidoreductases signature 3., MopB_Nitrate-R-NarG-like, Molybdopterin oxidoreductase, narG: nitrate reductase, alpha subunit…	IPR006963, IPR006657, IPR006655, IPR027467, IPR037943, IPR006655, IPR006963, IPR009010, IPR006656, IPR006468, IPR028189	Molybdopterin oxidoreductase, 4Fe-4S domain, Molybdopterin dinucleotide-binding domain, Molybdopterin oxidoreductase, prokaryotic, conserved site, Molybdopterin oxidoreductase, molybdopterin cofactor binding site, Nitrate reductase alpha subunit-like, MopB domain, Molybdopterin oxidoreductase, prokaryotic, conserved site, Molybdopterin oxidoreductase, 4Fe-4S domain, Aspartate decarboxylase-like d…	GO:0016491, GO:0055114, GO:0016491, GO:0043546, GO:0055114, GO:0009055, GO:0016491, GO:0055114, GO:0051539, GO:0009055, GO:0016491, GO:0055114, GO:0016491, GO:0055114,GO:0016491, GO:0055114, GO:0008940, GO:0009325, GO:0042126, GO:0055114	Reactome: R-HSA-611105|Reactome: R-HSA-6799198, Reactome: R-HSA-611105|Reactome: R-HSA-6799198,Reactome: R-HSA-611105|Reactome: R-HSA-6799198, KEGG: 00910+1.7.5.1|MetaCyc: PWY-6748, KEGG: 00910+1.7.5.1|MetaCyc: PWY-6748
NZ_CP050969.1_191_62	667121.ET1_23_00040	2.4e-224	784.6	Gammaproteobacteria	narK	GO:0003674,GO:0005215,GO:0005452,GO:0005575,GO:0005623,GO:0005886,GO:0005887,GO:0006810,GO:0006811,GO:0006820,GO:0008150,GO:0008509,GO:0015075,GO:0015103,GO:0015291,GO:0015318,GO:0015698,GO:0016020,GO:0016021,GO:0022804,GO:0022857,GO:0031224,GO:0031226,GO:0034220,GO:0044425,GO:0044459,GO:0044464,GO:0051179,GO:0051234,GO:0055085,GO:0071944,GO:0098656		ko:K02575	ko00910,map00910	M00615			ko00000,ko00001,ko00002,ko02000	2.A.1.8		iEcolC_1368.EcolC_2187,iUTI89_1310.UTI89_C1420	Bacteria	1MU27@1224,1RMUK@1236,COG2223@1,COG2223@2	NA|NA|NA	P	nitrate nitrite transporter	Pfam, PANTHER, Gene3D, CDD, TIGRFAM, PANTHER, Gene3D, SUPERFAMILY	PF07690, PTHR23515:SF8, G3DSA:1.20.1250.20, cd06174, TIGR00886, PTHR23515, G3DSA:1.20.1250.20, SSF103473	Major Facilitator Superfamily, MFS, 2A0108: nitrite transporter	IPR011701, IPR020846, IPR004737, IPR036259	Major facilitator superfamily, Major facilitator superfamily domain, Nitrate transporter, MFS transporter superfamily	GO:0016021, GO:0055085, GO:0015112, GO:0015113, GO:0015706, GO:0015707, GO:0016021
NZ_CP050969.1_191_63	558884.JRGM01000132_gene408	1.2e-115	422.9	Gammaproteobacteria	ylqF	GO:0003674,GO:0003824,GO:0003924,GO:0008150,GO:0016462,GO:0016787,GO:0016817,GO:0016818,GO:0017111,GO:0022613,GO:0042254,GO:0044085,GO:0071840		ko:K14540					ko00000,ko03009				Bacteria	1MV5H@1224,1RP79@1236,COG1161@1,COG1161@2	NA|NA|NA	S	Required for a late step of 50S ribosomal subunit assembly. Has GTPase activity	CDD, Pfam, SUPERFAMILY, PANTHER, Gene3D, PANTHER, PIRSF, Coils, Gene3D, TIGRFAM, ProSiteProfiles	cd01856, PF01926, SSF52540, PTHR11089, G3DSA:3.40.50.300, PTHR11089:SF4, PIRSF006230, Coil, G3DSA:1.10.1580.10, TIGR03596, PS51721	YlqF, 50S ribosome-binding GTPase, GTPase_YlqF: ribosome biogenesis GTP-binding protein YlqF, Circularly permuted (CP)-type guanine nucleotide-binding (G) domain profile.	IPR006073, IPR027417, IPR016478, IPR023179, IPR019991, IPR030378	GTP binding domain, P-loop containing nucleoside triphosphate hydrolase, GTPase, MTG1, GTP-binding protein, orthogonal bundle domain superfamily, GTP-binding protein, ribosome biogenesis, Circularly permuted (CP)-type guanine nucleotide-binding (G) domain	GO:0005525, GO:0005525
NZ_CP050969.1_191_65	1524467.IV04_08805	2.3e-230	804.7	Serratia	pyk	GO:0001871,GO:0003674,GO:0003824,GO:0004743,GO:0005488,GO:0005515,GO:0005575,GO:0005622,GO:0005623,GO:0005737,GO:0005829,GO:0005975,GO:0006082,GO:0006090,GO:0006091,GO:0006096,GO:0006116,GO:0006139,GO:0006163,GO:0006164,GO:0006165,GO:0006725,GO:0006732,GO:0006733,GO:0006734,GO:0006753,GO:0006754,GO:0006757,GO:0006793,GO:0006796,GO:0006807,GO:0006950,GO:0008150,GO:0008152,GO:0009056,GO:0009058,GO:…	2.7.1.40,2.7.7.4	ko:K00873,ko:K00958	ko00010,ko00230,ko00261,ko00450,ko00620,ko00920,ko01100,ko01110,ko01120,ko01130,ko01200,ko01230,ko04922,ko04930,ko05165,ko05203,ko05230,map00010,map00230,map00261,map00450,map00620,map00920,map01100,map01110,map01120,map01130,map01200,map01230,map04922,map04930,map05165,map05203,map05230	M00001,M00002,M00049,M00050,M00176,M00596	R00200,R00430,R00529,R01138,R01858,R02320,R04929	RC00002,RC00015,RC02809,RC02889	ko00000,ko00001,ko00002,ko01000,ko04131,ko04147			iECO103_1326.ECO103_1819,iPC815.YPO2393	Bacteria	1MU21@1224,1RMW3@1236,3ZZX4@613,COG0469@1,COG0469@2	NA|NA|NA	G	Pyruvate kinase	Pfam, TIGRFAM, PANTHER, SUPERFAMILY, Gene3D, PANTHER, SUPERFAMILY, Gene3D, SUPERFAMILY, PRINTS, PRINTS, PRINTS, PRINTS, PRINTS, PRINTS, PRINTS, Gene3D, CDD, Pfam, ProSitePatterns	PF00224, TIGR01064, PTHR11817, SSF50800, G3DSA:3.40.1380.20, PTHR11817:SF3, SSF51621, G3DSA:2.40.33.10, SSF52935, PR01050, PR01050, PR01050, PR01050, PR01050, PR01050, PR01050, G3DSA:3.20.20.60, cd00288, PF02887, PS00110	Pyruvate kinase, barrel domain, pyruv_kin: pyruvate kinase, Pyruvate kinase family signature, Pyruvate kinase family signature, Pyruvate kinase family signature, Pyruvate kinase family signature, Pyruvate kinase family signature, Pyruvate kinase family signature, Pyruvate kinase family signature, Pyruvate_Kinase, Pyruvate kinase, alpha/beta domain, Pyruvate kinase active site signature.	IPR015793, IPR001697, IPR001697, IPR011037, IPR036918, IPR015813, IPR015806, IPR036918, IPR001697, IPR001697, IPR001697, IPR001697, IPR001697, IPR001697, IPR001697, IPR001697, IPR015795, IPR018209	Pyruvate kinase, barrel, Pyruvate kinase, Pyruvate kinase, Pyruvate kinase-like, insert domain superfamily, Pyruvate kinase, C-terminal domain superfamily, Pyruvate/Phosphoenolpyruvate kinase-like domain superfamily, Pyruvate kinase, insert domain superfamily, Pyruvate kinase, C-terminal domain superfamily, Pyruvate kinase, Pyruvate kinase, Pyruvate kinase, Pyruvate kinase, Pyruvate kinase, Pyruv…	GO:0000287, GO:0004743, GO:0006096, GO:0030955, GO:0000287, GO:0004743, GO:0006096, GO:0030955, GO:0000287, GO:0004743, GO:0006096, GO:0030955, GO:0003824, GO:0004743, GO:0006096, GO:0000287, GO:0004743, GO:0006096, GO:0030955, GO:0000287, GO:0004743, GO:0006096, GO:0030955, GO:0000287, GO:0004743, GO:0006096, GO:0030955, GO:0000287, GO:0004743, GO:0006096, GO:0030955, GO:0000287, GO:0004743, GO:…	KEGG: 00010+2.7.1.40|KEGG: 00230+2.7.1.40|KEGG: 00620+2.7.1.40|MetaCyc: PWY-1042|MetaCyc: PWY-2221|MetaCyc: PWY-5484|MetaCyc: PWY-5723|MetaCyc: PWY-6142|MetaCyc: PWY-6886|MetaCyc: PWY-6901|MetaCyc: PWY-7003|MetaCyc: PWY-7218|MetaCyc: PWY-7383|Reactome: R-HSA-70171, KEGG: 00010+2.7.1.40|KEGG: 00230+2.7.1.40|KEGG: 00620+2.7.1.40|MetaCyc: PWY-1042|MetaCyc: PWY-2221|MetaCyc: PWY-5484|MetaCyc: PWY-572…
NZ_CP050969.1_191_66	1144664.F973_00475	1.3e-13	82.8	Moraxellaceae													Bacteria	1Q734@1224,1TMWX@1236,2DI48@1,301ZF@2,3NPKJ@468	NA|NA|NA			NA	NA	NA	NA	NA	NA	NA
NZ_CP050969.1_191_67	1448139.AI20_14500	1.7e-190	672.2	Aeromonadales	purP	GO:0003674,GO:0005215,GO:0005345,GO:0005575,GO:0005623,GO:0005886,GO:0005887,GO:0006810,GO:0006811,GO:0006812,GO:0006863,GO:0008150,GO:0008324,GO:0015075,GO:0015077,GO:0015078,GO:0015205,GO:0015207,GO:0015291,GO:0015293,GO:0015294,GO:0015295,GO:0015318,GO:0015672,GO:0015851,GO:0015853,GO:0016020,GO:0016021,GO:0022804,GO:0022857,GO:0022890,GO:0031224,GO:0031226,GO:0034220,GO:0044425,GO:0044459,GO:…		ko:K06901					ko00000,ko02000	2.A.1.40		iECH74115_1262.ECH74115_5145,iECOK1_1307.ECOK1_4117,iECSP_1301.ECSP_4762,iECUMN_1333.ECUMN_4191,iECs_1301.ECs4651,iG2583_1286.G2583_4505,iJO1366.b3714,iUTI89_1310.UTI89_C4220,iY75_1357.Y75_RS18500,iZ_1308.Z5209	Bacteria	1MUV0@1224,1RMBE@1236,1Y3XN@135624,COG2252@1,COG2252@2	NA|NA|NA	S	Permease family	Pfam, PANTHER, PANTHER, PIRSF	PF00860, PTHR43337, PTHR43337:SF1, PIRSF005353	Permease family	IPR006043, IPR026033	Xanthine/uracil/vitamin C permease, Purine permease PbuG-like	GO:0016020, GO:0022857, GO:0055085
NZ_CP050969.1_191_68	1076550.LH22_11470	1.4e-13	82	Pantoea	yoaH			ko:K09917					ko00000				Bacteria	1N89H@1224,1SCHP@1236,3W1D2@53335,COG3140@1,COG3140@2	NA|NA|NA	S	Belongs to the UPF0181 family	Pfam, MobiDBLite, ProDom, Hamap, MobiDBLite	PF03701, mobidb-lite, PD026807, MF_00507, mobidb-lite	Uncharacterised protein family (UPF0181), consensus disorder prediction, UPF0181 YOAH YPTB1650 VV20310 VPA0916 VCA0569 YPO1774/Y2534/YP1619 PLU2693 VVA0806 PM0480, UPF0181 protein YoaH [yoaH]., consensus disorder prediction	IPR005371, IPR005371, IPR005371	Uncharacterised protein family UPF0181, Uncharacterised protein family UPF0181, Uncharacterised protein family UPF0181
NZ_CP050969.1_191_69	675812.VHA_001226	2.3e-252	877.9	Vibrionales	fumA		4.2.1.2	ko:K01676,ko:K01677,ko:K01678	ko00020,ko00620,ko00720,ko01100,ko01110,ko01120,ko01130,ko01200,map00020,map00620,map00720,map01100,map01110,map01120,map01130,map01200	M00009,M00011,M00173,M00374,M00620	R01082	RC00443	ko00000,ko00001,ko00002,ko01000				Bacteria	1MUV9@1224,1RN8U@1236,1XT4K@135623,COG1838@1,COG1838@2,COG1951@1,COG1951@2	NA|NA|NA	C	Catalyzes the reversible hydration of fumarate to (S)- malate	Pfam, PANTHER, Gene3D, TIGRFAM, TIGRFAM, SUPERFAMILY, PIRSF, Pfam	PF05681, PTHR30389, G3DSA:3.20.130.10, TIGR00723, TIGR00722, SSF117457, PIRSF001394, PF05683	Fumarate hydratase (Fumerase), ttdB_fumA_fumB: hydrolyase, tartrate beta subunit/fumarate domain protein, Fe-S type, ttdA_fumA_fumB: hydrolyase, tartrate alpha subunit/fumarate domain protein, Fe-S type, Fumarase C-terminus	IPR004646, IPR036660, IPR004647, IPR004646, IPR036660, IPR011167, IPR004647	Fe-S hydro-lyase, tartrate dehydratase alpha-type, catalytic domain, Fe-S hydro-lyase, tartrate dehydratase beta-type, catalytic domain superfamily, Fe-S hydro-lyase, tartrate dehydratase beta-type, catalytic domain, Fe-S hydro-lyase, tartrate dehydratase alpha-type, catalytic domain, Fe-S hydro-lyase, tartrate dehydratase beta-type, catalytic domain superfamily, Iron-dependent fumarate hydratase…	GO:0016829, GO:0016836, GO:0016836, GO:0016829, GO:0016836, GO:0004333, GO:0006091, GO:0016836	KEGG: 00020+4.2.1.2|KEGG: 00620+4.2.1.2|KEGG: 00720+4.2.1.2|MetaCyc: PWY-5392|MetaCyc: PWY-561|MetaCyc: PWY-5690|MetaCyc: PWY-5913|MetaCyc: PWY-6728|MetaCyc: PWY-6969|MetaCyc: PWY-7254|MetaCyc: PWY-7384
NZ_CP050969.1_191_7	745277.GRAQ_01998	0	1646.7	Rahnella	mfd	GO:0000715,GO:0000716,GO:0003674,GO:0003676,GO:0003677,GO:0003824,GO:0005488,GO:0005515,GO:0005575,GO:0005622,GO:0005623,GO:0005737,GO:0005829,GO:0006139,GO:0006259,GO:0006281,GO:0006283,GO:0006289,GO:0006355,GO:0006725,GO:0006807,GO:0006950,GO:0006974,GO:0006996,GO:0008094,GO:0008150,GO:0008152,GO:0009889,GO:0009987,GO:0010468,GO:0010556,GO:0015616,GO:0016043,GO:0016462,GO:0016787,GO:0016817,GO:…		ko:K03723	ko03420,map03420				ko00000,ko00001,ko01000,ko03400				Bacteria	1MUXG@1224,1RNCU@1236,3FFES@34037,COG1197@1,COG1197@2	NA|NA|NA	L	Couples transcription and DNA repair by recognizing RNA polymerase (RNAP) stalled at DNA lesions. Mediates ATP-dependent release of RNAP and its truncated transcript from the DNA, and recruitment of nucleotide excision repair machinery to the damaged site	Pfam, ProSiteProfiles, Gene3D, SUPERFAMILY, Gene3D, SMART, SUPERFAMILY, Pfam, PANTHER, TIGRFAM, PANTHER, Pfam, SMART, SMART, CDD, SUPERFAMILY, Gene3D, Gene3D, SUPERFAMILY, CDD, Gene3D, SMART, Gene3D, SUPERFAMILY, Pfam, Gene3D, Hamap, ProSiteProfiles, SUPERFAMILY	PF00270, PS51192, G3DSA:3.40.50.300, SSF52540, G3DSA:2.30.30.840, SM00490, SSF141259, PF03461, PTHR14025:SF27, TIGR00580, PTHR14025, PF02559, SM00487, SM01058, cd00046, SSF52540, G3DSA:3.90.1150.50, G3DSA:3.40.50.11140, SSF52540, cd00079, G3DSA:3.30.2060.10, SM00982, G3DSA:3.40.50.11180, SSF143517, PF00271, G3DSA:3.40.50.300, MF_00969, PS51194, SSF52540	DEAD/DEAH box helicase, Superfamilies 1 and 2 helicase ATP-binding type-1 domain profile., TRCF domain, mfd: transcription-repair coupling factor, CarD-like/TRCF domain, DEXDc,HELICc,Helicase conserved C-terminal domain, Transcription-repair-coupling factor [mfd]., Superfamilies 1 and 2 helicase C-terminal domain profile.	IPR011545, IPR014001, IPR027417, IPR001650, IPR036101, IPR005118, IPR004576, IPR003711, IPR014001, IPR003711, IPR027417, IPR037235, IPR027417, IPR001650, IPR005118, IPR037235, IPR001650, IPR004576, IPR001650, IPR027417	DEAD/DEAH box helicase domain, Helicase superfamily 1/2, ATP-binding domain, P-loop containing nucleoside triphosphate hydrolase, Helicase, C-terminal, CarD-like/TRCF domain superfamily, Transcription-repair-coupling factor, C-terminal domain, Transcription-repair coupling factor, CarD-like/TRCF domain, Helicase superfamily 1/2, ATP-binding domain, CarD-like/TRCF domain, P-loop containing nucleos…	GO:0003676, GO:0005524, GO:0006281, GO:0003684, GO:0005524, GO:0006281, GO:0006281,GO:0003684, GO:0005524, GO:0006281
NZ_CP050969.1_191_70	1453496.AT03_11890	5.3e-167	594.3	Gammaproteobacteria	pabB	GO:0000287,GO:0003674,GO:0003824,GO:0005488,GO:0005575,GO:0005622,GO:0005623,GO:0005737,GO:0006082,GO:0006575,GO:0006725,GO:0006732,GO:0006760,GO:0006807,GO:0008150,GO:0008152,GO:0008483,GO:0009058,GO:0009108,GO:0009396,GO:0009987,GO:0016053,GO:0016740,GO:0016769,GO:0018130,GO:0019438,GO:0019752,GO:0034641,GO:0042398,GO:0042558,GO:0042559,GO:0043167,GO:0043169,GO:0043436,GO:0043603,GO:0043604,GO:…	2.6.1.85	ko:K01665,ko:K13950	ko00790,map00790		R01716	RC00010,RC01418	ko00000,ko00001,ko01000			iEC042_1314.EC042_1977	Bacteria	1MVBJ@1224,1RMSE@1236,COG0147@1,COG0147@2	NA|NA|NA	EH	Part of a heterotetrameric complex that catalyzes the two-step biosynthesis of anthranilate, an intermediate in the biosynthesis of L-tryptophan. In the first step, the glutamine- binding beta subunit (TrpG) of anthranilate synthase (AS) provides the glutamine amidotransferase activity which generates ammonia as a substrate that, along with chorismate, is used in the second step, catalyzed by the…	Gene3D, Pfam, TIGRFAM, MobiDBLite, SUPERFAMILY, Pfam, MobiDBLite, PRINTS, PRINTS, PRINTS, PRINTS, PANTHER	G3DSA:3.60.120.10, PF04715, TIGR00553, mobidb-lite, SSF56322, PF00425, mobidb-lite, PR00095, PR00095, PR00095, PR00095, PTHR11236	Anthranilate synthase component I, N terminal region, pabB: aminodeoxychorismate synthase, component I, consensus disorder prediction, chorismate binding enzyme, consensus disorder prediction, Anthranilate synthase component I signature, Anthranilate synthase component I signature, Anthranilate synthase component I signature, Anthranilate synthase component I signature	IPR005801, IPR006805, IPR005802, IPR005801, IPR015890, IPR019999, IPR019999, IPR019999, IPR019999	ADC synthase, Anthranilate synthase component I, N-terminal, Para-aminobenzoate synthase, component I, ADC synthase, Chorismate-utilising enzyme, C-terminal, Anthranilate synthase component I-like, Anthranilate synthase component I-like, Anthranilate synthase component I-like, Anthranilate synthase component I-like	GO:0009058, GO:0009058, GO:0009396, GO:0009058, GO:0009058, GO:0009058, GO:0009058, GO:0009058	KEGG: 00400+4.1.3.27|KEGG: 00405+4.1.3.27|MetaCyc: PWY-5958|MetaCyc: PWY-6660|MetaCyc: PWY-6661, KEGG: 00790+2.6.1.85|MetaCyc: PWY-6543,KEGG: 00400+4.1.3.27|KEGG: 00405+4.1.3.27|MetaCyc: PWY-5958|MetaCyc: PWY-6660|MetaCyc: PWY-6661, KEGG: 00400+4.1.3.27|KEGG: 00405+4.1.3.27|MetaCyc: PWY-5958|MetaCyc: PWY-6660|MetaCyc: PWY-6661, KEGG: 00400+4.1.3.27|KEGG: 00405+4.1.3.27|MetaCyc: PWY-5958|MetaCyc: …
NZ_CP050969.1_191_71	1216966.BAUC01000017_gene643	6.2e-41	174.1	Gammaproteobacteria	nudL	GO:0003674,GO:0003824,GO:0016787,GO:0016817,GO:0016818											Bacteria	1RD2C@1224,1SA4Q@1236,COG0494@1,COG0494@2	NA|NA|NA	L	NUDIX hydrolase	ProSiteProfiles, PANTHER, CDD, Pfam, SUPERFAMILY, PANTHER, ProSitePatterns, Gene3D	PS51462, PTHR12992:SF11, cd03426, PF00293, SSF55811, PTHR12992, PS01293, G3DSA:3.90.79.10	Nudix hydrolase domain profile., CoAse, NUDIX domain, Nudix CoA signature.	IPR000086, IPR000086, IPR015797, IPR000059	NUDIX hydrolase domain, NUDIX hydrolase domain, NUDIX hydrolase-like domain superfamily, NUDIX hydrolase, NudL, conserved site	GO:0016787, GO:0016787, GO:0016787, GO:0000287, GO:0009132, GO:0016818, GO:0030145	Reactome: R-HSA-390918|Reactome: R-HSA-9033241
NZ_CP050969.1_191_72	675812.VHA_001229	4.9e-179	634	Vibrionales	sdaC			ko:K03834,ko:K03835,ko:K03837					ko00000,ko02000	2.A.42.1.1,2.A.42.1.2,2.A.42.2.1			Bacteria	1NQFA@1224,1RQ8Q@1236,1XSJ0@135623,COG0814@1,COG0814@2	NA|NA|NA	E	serine transporter	PANTHER, TIGRFAM, Pfam, PANTHER	PTHR35334:SF2, TIGR00814, PF03222, PTHR35334	stp: serine transporter, Tryptophan/tyrosine permease family	IPR004694, IPR018227	Hydroxy amino acid transporter, Amino acid/polyamine transporter 2	GO:0006865, GO:0015171, GO:0016021, GO:0003333
NZ_CP050969.1_191_73	29486.NJ56_09555	5.4e-216	756.9	Yersinia	sdaA	GO:0003674,GO:0003824,GO:0003941,GO:0005575,GO:0005622,GO:0005623,GO:0005737,GO:0005829,GO:0006082,GO:0006520,GO:0006563,GO:0006565,GO:0006807,GO:0008150,GO:0008152,GO:0009056,GO:0009063,GO:0009069,GO:0009071,GO:0009987,GO:0016054,GO:0016829,GO:0016840,GO:0016841,GO:0019752,GO:0043436,GO:0044237,GO:0044238,GO:0044248,GO:0044281,GO:0044282,GO:0044424,GO:0044444,GO:0044464,GO:0046395,GO:0071704,GO:…	4.3.1.17	ko:K01752	ko00260,ko00270,ko01100,ko01110,ko01130,ko01200,ko01230,map00260,map00270,map01100,map01110,map01130,map01200,map01230		R00220,R00590	RC00331,RC02600	ko00000,ko00001,ko01000			iECUMN_1333.ECUMN_2106	Bacteria	1MUZN@1224,1RMJZ@1236,41ER6@629,COG1760@1,COG1760@2	NA|NA|NA	E	L-serine dehydratase	Gene3D, SUPERFAMILY, PANTHER, TIGRFAM, Pfam, PANTHER, Pfam	G3DSA:3.30.1330.90, SSF143548, PTHR30182:SF11, TIGR00720, PF03315, PTHR30182, PF03313	sda_mono: L-serine ammonia-lyase, Serine dehydratase beta chain, Serine dehydratase alpha chain	IPR029009, IPR029009, IPR004644, IPR005131, IPR005130	Allosteric substrate binding domain superfamily, Allosteric substrate binding domain superfamily, Iron-sulphur-dependent L-serine dehydratase single chain form, Serine dehydratase beta chain, Serine dehydratase-like, alpha subunit	GO:0003941, GO:0006094, GO:0003941, GO:0006094, GO:0051539	Reactome: R-HSA-977347, Reactome: R-HSA-977347, KEGG: 00260+4.3.1.17|KEGG: 00270+4.3.1.17, KEGG: 00260+4.3.1.17|KEGG: 00270+4.3.1.17
NZ_CP050969.1_191_74	1448139.AI20_08805	2.5e-103	382.5	Aeromonadales	PP0279												Bacteria	1NHK1@1224,1RQ17@1236,1Y4YH@135624,2C7MP@1,2Z7Q4@2	NA|NA|NA	S	Methyltransferase domain	SUPERFAMILY, Pfam, PANTHER	SSF53335, PF13679, PTHR13369	Methyltransferase domain	IPR029063, IPR025714	S-adenosyl-L-methionine-dependent methyltransferase, Methyltransferase domain
NZ_CP050969.1_191_75	1001530.BACE01000010_gene3404	2.1e-153	548.5	Vibrionales	cysB	GO:0003674,GO:0003676,GO:0003677,GO:0005488,GO:0005515,GO:0005575,GO:0005622,GO:0005623,GO:0005737,GO:0005829,GO:0008150,GO:0009314,GO:0009628,GO:0010165,GO:0010212,GO:0042802,GO:0044424,GO:0044444,GO:0044464,GO:0050896,GO:0097159,GO:1901363		ko:K13634					ko00000,ko03000				Bacteria	1MU8N@1224,1RN7T@1236,1XTGJ@135623,COG0583@1,COG0583@2	NA|NA|NA	K	Transcriptional regulator	Gene3D, Pfam, Gene3D, Gene3D, Pfam, PRINTS, PRINTS, PRINTS, ProSiteProfiles, CDD, SUPERFAMILY, PANTHER, PANTHER, SUPERFAMILY	G3DSA:3.40.190.10, PF03466, G3DSA:3.40.190.10, G3DSA:1.10.10.10, PF00126, PR00039, PR00039, PR00039, PS50931, cd08413, SSF53850, PTHR30126, PTHR30126:SF6, SSF46785	LysR substrate binding domain, Bacterial regulatory helix-turn-helix protein, lysR family, LysR bacterial regulatory protein HTH signature, LysR bacterial regulatory protein HTH signature, LysR bacterial regulatory protein HTH signature, LysR-type HTH domain profile., PBP2_CysB_like, nan]	IPR005119, IPR036388, IPR000847, IPR000847, IPR000847, IPR000847, IPR000847, IPR037423, IPR036390	LysR, substrate-binding, Winged helix-like DNA-binding domain superfamily, Transcription regulator HTH, LysR, Transcription regulator HTH, LysR, Transcription regulator HTH, LysR, Transcription regulator HTH, LysR, Transcription regulator HTH, LysR, HTH-type transcriptional regulator CysB, PBP2 domain, Winged helix DNA-binding domain superfamily	GO:0003700, GO:0006355, GO:0003700, GO:0006355, GO:0003700, GO:0006355, GO:0003700, GO:0006355, GO:0003700, GO:0006355, GO:0006355, nan]
NZ_CP050969.1_191_76	312309.VF_1491	3e-46	192.2	Vibrionales	EBIG1844												Bacteria	1R415@1224,1RNDD@1236,1XSGV@135623,28HXC@1,2Z831@2	NA|NA|NA			Coils	Coil
NZ_CP050969.1_191_77	273526.SMDB11_1923	0	1432.2	Serratia	topA	GO:0003674,GO:0003824,GO:0003916,GO:0003917,GO:0006139,GO:0006259,GO:0006265,GO:0006725,GO:0006807,GO:0006996,GO:0008150,GO:0008152,GO:0009987,GO:0016043,GO:0016853,GO:0034641,GO:0043170,GO:0044237,GO:0044238,GO:0044260,GO:0046483,GO:0051276,GO:0071103,GO:0071704,GO:0071840,GO:0090304,GO:0140097,GO:1901360	5.99.1.2	ko:K03168					ko00000,ko01000,ko03032,ko03400				Bacteria	1MUFZ@1224,1RNZ2@1236,3ZZIV@613,COG0550@1,COG0550@2	NA|NA|NA	L	Releases the supercoiling and torsional tension of DNA, which is introduced during the DNA replication and transcription, by transiently cleaving and rejoining one strand of the DNA duplex. Introduces a single-strand break via transesterification at a target site in duplex DNA. The scissile phosphodiester is attacked by the catalytic tyrosine of the enzyme, resulting in the formation of a DNA-(5-…	CDD, SUPERFAMILY, SUPERFAMILY, Hamap, Gene3D, TIGRFAM, PRINTS, PRINTS, PRINTS, PRINTS, PRINTS, ProSiteProfiles, Gene3D, Pfam, Pfam, Gene3D, Gene3D, MobiDBLite, SUPERFAMILY, Pfam, Pfam, ProSitePatterns, Coils, Gene3D, Pfam, Pfam, SUPERFAMILY, Gene3D, CDD, SMART, SMART, SMART, Gene3D, PANTHER	cd03363, SSF57783, SSF56712, MF_00952, G3DSA:3.40.50.140, TIGR01051, PR00417, PR00417, PR00417, PR00417, PR00417, PS50880, G3DSA:2.70.20.10, PF01131, PF01751, G3DSA:3.30.65.10, G3DSA:3.30.65.10, mobidb-lite, SSF57783, PF01396, PF01396, PS00396, Coil, G3DSA:1.10.290.10, PF08272, PF08272, SSF57783, G3DSA:2.20.25.10, cd00186, SM00437, SM00436, SM00493, G3DSA:1.10.460.10, PTHR42785	TOPRIM_TopoIA_TopoI, DNA topoisomerase 1 [topA]., topA_bact: DNA topoisomerase I, Prokaryotic DNA topoisomerase I signature, Prokaryotic DNA topoisomerase I signature, Prokaryotic DNA topoisomerase I signature, Prokaryotic DNA topoisomerase I signature, Prokaryotic DNA topoisomerase I signature, Toprim domain profile., DNA topoisomerase, Toprim domain, consensus disorder prediction, Topoisomerase…	IPR034149, IPR023405, IPR028612, IPR005733, IPR013497, IPR013497, IPR013497, IPR013497, IPR013497, IPR006171, IPR013825, IPR013497, IPR006171,IPR013498, IPR013498, IPR023406, IPR013826, IPR013263, IPR013263, IPR013497, IPR003602, IPR003601, IPR006171, IPR013824, IPR000380	DNA topoisomerase 1, TOPRIM domain, DNA topoisomerase, type IA, core domain, DNA topoisomerase I, type IA, DNA topoisomerase I, bacterial-type, DNA topoisomerase, type IA, central, DNA topoisomerase, type IA, central, DNA topoisomerase, type IA, central, DNA topoisomerase, type IA, central, DNA topoisomerase, type IA, central, TOPRIM domain, DNA topoisomerase, type IA, central region, subdomain 2…	GO:0003677, GO:0003916, GO:0006265, GO:0003677, GO:0003917, GO:0006265, GO:0003677, GO:0003916, GO:0006265, GO:0003677, GO:0003916, GO:0006265, GO:0003677, GO:0003916, GO:0006265, GO:0003677, GO:0003916, GO:0006265, GO:0003677, GO:0003916, GO:0006265, GO:0003677, GO:0003916, GO:0006265, GO:0003677, GO:0003916, GO:0005694, GO:0006265, GO:0003677, GO:0003916, GO:0005694, GO:0006265, GO:0003917, GO:…	Reactome: R-HSA-5685938|Reactome: R-HSA-5685942|Reactome: R-HSA-5693554|Reactome: R-HSA-5693568|Reactome: R-HSA-5693579|Reactome: R-HSA-5693607|Reactome: R-HSA-5693616|Reactome: R-HSA-6804756|Reactome: R-HSA-69473|Reactome: R-HSA-912446, Reactome: R-HSA-5685938|Reactome: R-HSA-5685942|Reactome: R-HSA-5693554|Reactome: R-HSA-5693568|Reactome: R-HSA-5693579|Reactome: R-HSA-5693607|Reactome: R-HSA-5…
NZ_CP050969.1_191_78	382245.ASA_3112	9.1e-155	553.5	Aeromonadales	astB	GO:0003674,GO:0003824,GO:0006082,GO:0006520,GO:0006525,GO:0006527,GO:0006807,GO:0008150,GO:0008152,GO:0009015,GO:0009056,GO:0009063,GO:0009064,GO:0009065,GO:0009987,GO:0016054,GO:0016787,GO:0016810,GO:0016813,GO:0019752,GO:0043436,GO:0044237,GO:0044238,GO:0044248,GO:0044281,GO:0044282,GO:0046395,GO:0071704,GO:1901564,GO:1901565,GO:1901575,GO:1901605,GO:1901606	3.5.3.23	ko:K01484	ko00330,ko01100,map00330,map01100		R04189	RC00024	ko00000,ko00001,ko01000			iECH74115_1262.ECH74115_2463,iECSP_1301.ECSP_2313,iECs_1301.ECs2451,iG2583_1286.G2583_2191	Bacteria	1MUJV@1224,1RNSS@1236,1Y3ZM@135624,COG3724@1,COG3724@2	NA|NA|NA	E	Catalyzes the hydrolysis of N(2)-succinylarginine into N(2)-succinylornithine, ammonia and CO(2)	Hamap, PANTHER, SUPERFAMILY, PANTHER, TIGRFAM, Gene3D, Pfam	MF_01172, PTHR30420, SSF55909, PTHR30420:SF2, TIGR03241, G3DSA:3.75.10.20, PF04996	N-succinylarginine dihydrolase [astB]., arg_catab_astB: succinylarginine dihydrolase, Succinylarginine dihydrolase	IPR007079, IPR007079, IPR037031, IPR007079	Succinylarginine dihydrolase, Succinylarginine dihydrolase, Succinylarginine dihydrolase superfamily, Succinylarginine dihydrolase	GO:0006525, GO:0009015, GO:0006525, GO:0009015, GO:0006525, GO:0009015, GO:0006525, GO:0009015	KEGG: 00330+3.5.3.23, KEGG: 00330+3.5.3.23, KEGG: 00330+3.5.3.23, KEGG: 00330+3.5.3.23
NZ_CP050969.1_191_79	1249634.D781_2408	6e-26	123.2	Serratia	yciN	GO:0005575,GO:0005622,GO:0005623,GO:0005737,GO:0005829,GO:0044424,GO:0044444,GO:0044464											Bacteria	1N8PV@1224,1S938@1236,2CK10@1,32SBA@2,403YK@613	NA|NA|NA	S	Protein of unknown function (DUF2498)	Pfam, Gene3D	PF10692, G3DSA:1.10.1900.30	Protein of unknown function (DUF2498)	IPR019633, IPR038191	Protein of unknown function DUF2498, YciN superfamily
NZ_CP050969.1_191_8	1214065.BAGV01000014_gene2934	1.6e-193	682.2	unclassified Enterobacteriaceae	ndh	GO:0000166,GO:0003674,GO:0003824,GO:0003954,GO:0005488,GO:0005575,GO:0005623,GO:0005886,GO:0006091,GO:0008137,GO:0008150,GO:0008152,GO:0009060,GO:0009061,GO:0009987,GO:0015980,GO:0016020,GO:0016491,GO:0016651,GO:0016655,GO:0019646,GO:0022900,GO:0022904,GO:0030964,GO:0032991,GO:0036094,GO:0042592,GO:0043167,GO:0043168,GO:0044237,GO:0044425,GO:0044464,GO:0045333,GO:0048037,GO:0048878,GO:0050136,GO:…	1.6.99.3	ko:K03885	ko00190,map00190				ko00000,ko00001,ko01000			iECIAI39_1322.ECIAI39_2051,iPC815.YPO1617	Bacteria	1MX96@1224,1RM9I@1236,2832W@191675,COG1252@1,COG1252@2	NA|NA|NA	C	Pyridine nucleotide-disulphide oxidoreductase	Pfam, PRINTS, PRINTS, PRINTS, PANTHER, PRINTS, PRINTS, PRINTS, PRINTS, Gene3D, SUPERFAMILY, PANTHER	PF07992, PR00411, PR00411, PR00411, PTHR43706:SF9, PR00368, PR00368, PR00368, PR00368, G3DSA:3.50.50.100, SSF51905, PTHR43706	Pyridine nucleotide-disulphide oxidoreductase, Pyridine nucleotide disulphide reductase class-I signature, Pyridine nucleotide disulphide reductase class-I signature, Pyridine nucleotide disulphide reductase class-I signature, FAD-dependent pyridine nucleotide reductase signature, FAD-dependent pyridine nucleotide reductase signature, FAD-dependent pyridine nucleotide reductase signature, FAD-dep…	IPR023753,IPR036188	FAD/NAD(P)-binding domain,FAD/NAD(P)-binding domain superfamily	GO:0016491, GO:0055114
NZ_CP050969.1_191_80	NA	NA	NA	NA	NA	NA	NA	NA	NA	NA	NA	NA	NA	NA	NA	NA	NA	NA	NA	NA	NA	Pfam	PF05656	Protein of unknown function (DUF805)	IPR008523	Protein of unknown function DUF805	GO:0016021
NZ_CP050969.1_191_81	1111728.ATYS01000032_gene1659	1.3e-113	416.4	Gammaproteobacteria	sohB	GO:0005575,GO:0005623,GO:0005886,GO:0006508,GO:0006807,GO:0008150,GO:0008152,GO:0016020,GO:0019538,GO:0043170,GO:0044238,GO:0044464,GO:0071704,GO:0071944,GO:1901564		ko:K04773,ko:K04774					ko00000,ko01000,ko01002				Bacteria	1MUXE@1224,1RNN9@1236,COG0616@1,COG0616@2	NA|NA|NA	OU	peptidase	CDD, Pfam, MobiDBLite, PANTHER, Pfam, Gene3D, PANTHER, SUPERFAMILY, Gene3D, Coils	cd07023, PF08496, mobidb-lite, PTHR42987:SF1, PF01343, G3DSA:3.40.1750.20, PTHR42987, SSF52096, G3DSA:3.90.226.10, Coil	S49_Sppa_N_C, Peptidase family S49 N-terminal, consensus disorder prediction, Peptidase family S49,nan]	IPR013703, IPR002142, IPR029045	Peptidase S49, N-terminal proteobacteria, Peptidase S49, ClpP/crotonase-like domain superfamily	GO:0004252, GO:0005886, GO:0006508, GO:0008233,nan]
NZ_CP050969.1_191_82	550540.Fbal_2529	9.7e-90	336.7	Gammaproteobacteria													Bacteria	1MWBC@1224,1RNNV@1236,COG1028@1,COG1028@2	NA|NA|NA	IQ	COG1028 Dehydrogenases with different specificities (related to short-chain alcohol dehydrogenases)	Gene3D, PANTHER, PRINTS, PRINTS, PRINTS, PRINTS, PRINTS, ProSitePatterns, SUPERFAMILY, Pfam, PANTHER	G3DSA:3.40.50.720, PTHR42901, PR00081, PR00081, PR00081, PR00081, PR00081, PS00061, SSF51735, PF00106, PTHR42901:SF2	Glucose/ribitol dehydrogenase family signature, Glucose/ribitol dehydrogenase family signature, Glucose/ribitol dehydrogenase family signature, Glucose/ribitol dehydrogenase family signature, Glucose/ribitol dehydrogenase family signature, Short-chain dehydrogenases/reductases family signature., short chain dehydrogenase	IPR002347, IPR002347, IPR002347, IPR002347, IPR002347, IPR020904, IPR036291, IPR002347	Short-chain dehydrogenase/reductase SDR, Short-chain dehydrogenase/reductase SDR, Short-chain dehydrogenase/reductase SDR, Short-chain dehydrogenase/reductase SDR, Short-chain dehydrogenase/reductase SDR, Short-chain dehydrogenase/reductase, conserved site, NAD(P)-binding domain superfamily, Short-chain dehydrogenase/reductase SDR	GO:0016491
NZ_CP050969.1_191_83	NA	NA	NA	NA	NA	NA	NA	NA	NA	NA	NA	NA	NA	NA	NA	NA	NA	NA	NA	NA	NA	MobiDBLite, MobiDBLite	mobidb-lite, mobidb-lite	consensus disorder prediction, consensus disorder prediction
NZ_CP050969.1_191_84	1073999.BN137_4071	8.9e-124	449.9	Gammaproteobacteria	rluB	GO:0000154,GO:0000455,GO:0001522,GO:0003674,GO:0003824,GO:0005575,GO:0005622,GO:0005623,GO:0005737,GO:0005829,GO:0006139,GO:0006364,GO:0006396,GO:0006725,GO:0006807,GO:0008150,GO:0008152,GO:0009451,GO:0009982,GO:0009987,GO:0010467,GO:0016070,GO:0016072,GO:0016853,GO:0016866,GO:0022613,GO:0031118,GO:0034470,GO:0034641,GO:0034660,GO:0042254,GO:0043170,GO:0043412,GO:0044085,GO:0044237,GO:0044238,GO:…	5.4.99.22	ko:K06178					ko00000,ko01000,ko03009				Bacteria	1MUCE@1224,1RQU0@1236,COG1187@1,COG1187@2	NA|NA|NA	J	Belongs to the pseudouridine synthase RsuA family	Pfam, PANTHER, PANTHER, Gene3D, TIGRFAM, ProSiteProfiles, SMART, Gene3D, ProSitePatterns, CDD, SUPERFAMILY, MobiDBLite, Pfam, SUPERFAMILY, MobiDBLite, CDD	PF00849, PTHR21600, PTHR21600:SF2, G3DSA:3.30.2350.10, TIGR00093, PS50889, SM00363, G3DSA:3.10.290.10, PS01149, cd02556, SSF55120, mobidb-lite, PF01479, SSF55174, mobidb-lite, cd00165	RNA pseudouridylate synthase, TIGR00093: pseudouridine synthase, S4 RNA-binding domain profile., Rsu family of pseudouridine synthase signature., PseudoU_synth_RluB, consensus disorder prediction, S4 domain, consensus disorder prediction, S4	IPR006145, IPR000748, IPR000748, IPR002942, IPR002942, IPR036986, IPR018496, IPR020103, IPR002942, IPR002942	Pseudouridine synthase, RsuA/RluB/C/D/E/F, Pseudouridine synthase, RsuA/RluB/E/F, Pseudouridine synthase, RsuA/RluB/E/F, RNA-binding S4 domain, RNA-binding S4 domain, RNA-binding S4 domain superfamily, Pseudouridine synthase, RsuA/RluB/E/F, conserved site, Pseudouridine synthase, catalytic domain superfamily, RNA-binding S4 domain, RNA-binding S4 domain	GO:0001522, GO:0003723, GO:0009451, GO:0009982, GO:0001522, GO:0003723, GO:0009451, GO:0016866, GO:0001522, GO:0003723, GO:0009451, GO:0016866, GO:0003723, GO:0003723, GO:0003723, GO:0001522, GO:0003723, GO:0009451, GO:0016866, GO:0001522, GO:0003723, GO:0009451, GO:0009982, GO:0003723, GO:0003723	Reactome: R-HSA-156827|Reactome: R-HSA-156902|Reactome: R-HSA-1799339|Reactome: R-HSA-192823|Reactome: R-HSA-2408557|Reactome: R-HSA-6791226|Reactome: R-HSA-72649|Reactome: R-HSA-72689|Reactome: R-HSA-72695|Reactome: R-HSA-72702|Reactome: R-HSA-72706|Reactome: R-HSA-72764|Reactome: R-HSA-9010553|Reactome: R-HSA-975956|Reactome: R-HSA-975957, Reactome: R-HSA-156827|Reactome: R-HSA-156902|Reactome:…
NZ_CP050969.1_191_85	1214065.BAGV01000014_gene3096	7.9e-90	336.7	unclassified Enterobacteriaceae	yciO	GO:0005575,GO:0005622,GO:0005623,GO:0005737,GO:0005829,GO:0044424,GO:0044444,GO:0044464	2.7.7.87	ko:K07566			R10463	RC00745	ko00000,ko01000,ko03009,ko03016				Bacteria	1MVPM@1224,1RNU8@1236,283CE@191675,COG0009@1,COG0009@2	NA|NA|NA	J	Belongs to the SUA5 family	ProSiteProfiles, TIGRFAM, Pfam, PANTHER, SUPERFAMILY, PANTHER, Gene3D	PS51163, TIGR00057, PF01300, PTHR42828, SSF55821, PTHR42828:SF2, G3DSA:3.90.870.10	YrdC-like domain profile., TIGR00057: tRNA threonylcarbamoyl adenosine modification protein, Sua5/YciO/YrdC/YwlC family, Telomere recombination, nan]	IPR006070, IPR006070, IPR006070, IPR017945	YrdC-like domain, YrdC-like domain, YrdC-like domain, DHBP synthase RibB-like alpha/beta domain superfamily	GO:0003725, GO:0003725, GO:0003725, nan]
NZ_CP050969.1_191_86	218491.ECA2293	2.1e-102	379	Pectobacterium	trpH	GO:0003674,GO:0003824,GO:0004518,GO:0004527,GO:0004529,GO:0004532,GO:0004534,GO:0004536,GO:0004540,GO:0005488,GO:0006139,GO:0006259,GO:0006521,GO:0006725,GO:0006793,GO:0006796,GO:0006807,GO:0008150,GO:0008152,GO:0008252,GO:0008409,GO:0009987,GO:0010565,GO:0016070,GO:0016311,GO:0016787,GO:0016788,GO:0016791,GO:0016796,GO:0016895,GO:0016896,GO:0019222,GO:0030145,GO:0031323,GO:0033238,GO:0034641,GO:…	3.1.3.97	ko:K07053			R00188,R11188	RC00078	ko00000,ko01000				Bacteria	1MQ1W@122277,1MWIH@1224,1RNCG@1236,COG0613@1,COG0613@2	NA|NA|NA	S	DNA polymerase alpha chain like domain	PANTHER, Gene3D, SMART, Gene3D, Pfam, CDD, SUPERFAMILY	PTHR42924, G3DSA:3.20.20.140, SM00481, G3DSA:1.10.150.650, PF02811, cd07438, SSF89550	PHP domain, PHP_HisPPase_AMP	IPR003141, IPR004013, IPR016195	Polymerase/histidinol phosphatase, N-terminal, PHP domain, Polymerase/histidinol phosphatase-like	GO:0003824, GO:0003824	Reactome: R-HSA-6784531|Reactome: R-HSA-6791226
NZ_CP050969.1_191_88	1348635.BBJY01000017_gene4120	1e-173	616.7	Vibrionales	trpE	GO:0000162,GO:0003674,GO:0003824,GO:0004049,GO:0005575,GO:0005622,GO:0005623,GO:0005737,GO:0005829,GO:0005950,GO:0006082,GO:0006520,GO:0006568,GO:0006576,GO:0006586,GO:0006725,GO:0006807,GO:0008150,GO:0008152,GO:0008652,GO:0009058,GO:0009072,GO:0009073,GO:0009308,GO:0009309,GO:0009987,GO:0016053,GO:0016829,GO:0016830,GO:0016833,GO:0018130,GO:0019438,GO:0019752,GO:0032991,GO:0034641,GO:0042401,GO:…	4.1.3.27	ko:K01657	ko00400,ko00405,ko01100,ko01110,ko01130,ko01230,ko02024,ko02025,map00400,map00405,map01100,map01110,map01130,map01230,map02024,map02025	M00023	R00985,R00986	RC00010,RC02148,RC02414	ko00000,ko00001,ko00002,ko01000			iG2583_1286.G2583_1603,iIT341.HP1282	Bacteria	1MVBJ@1224,1RMSE@1236,1XSGC@135623,COG0147@1,COG0147@2	NA|NA|NA	E	COG0147 Anthranilate para-aminobenzoate synthases component I	Pfam, PIRSF, PANTHER, PRINTS, PRINTS, PRINTS, PRINTS, Pfam, TIGRFAM, PANTHER, SUPERFAMILY, Gene3D	PF00425, PIRSF001373, PTHR11236, PR00095, PR00095, PR00095, PR00095, PF04715, TIGR00565, PTHR11236:SF22, SSF56322, G3DSA:3.60.120.10	chorismate binding enzyme, Anthranilate synthase component I signature, Anthranilate synthase component I signature, Anthranilate synthase component I signature, Anthranilate synthase component I signature, Anthranilate synthase component I, N terminal region, trpE_proteo: anthranilate synthase component I	IPR015890, IPR005257, IPR019999, IPR019999, IPR019999, IPR019999, IPR006805, IPR005257, IPR005257, IPR005801, IPR005801	Chorismate-utilising enzyme, C-terminal, Anthranilate synthase component I, TrpE-like, bacterial, Anthranilate synthase component I-like, Anthranilate synthase component I-like, Anthranilate synthase component I-like, Anthranilate synthase component I-like, Anthranilate synthase component I, N-terminal, Anthranilate synthase component I, TrpE-like, bacterial, Anthranilate synthase component I, Tr…	GO:0004049, GO:0009058, GO:0009058, GO:0009058, GO:0009058, GO:0009058, GO:0009058, GO:0004049, GO:0009058, GO:0004049, GO:0009058, GO:0009058, GO:0009058	KEGG: 00400+4.1.3.27|KEGG: 00405+4.1.3.27|MetaCyc: PWY-5958|MetaCyc: PWY-6660|MetaCyc: PWY-6661, KEGG: 00400+4.1.3.27|KEGG: 00405+4.1.3.27|MetaCyc: PWY-5958|MetaCyc: PWY-6660|MetaCyc: PWY-6661, KEGG: 00400+4.1.3.27|KEGG: 00405+4.1.3.27|MetaCyc: PWY-5958|MetaCyc: PWY-6660|MetaCyc: PWY-6661, KEGG: 00400+4.1.3.27|KEGG: 00405+4.1.3.27|MetaCyc: PWY-5958|MetaCyc: PWY-6660|MetaCyc: PWY-6661, KEGG: 00400…
NZ_CP050969.1_191_89	1267600.JFGT01000007_gene1669	3.5e-67	261.5	Pantoea	trpG	GO:0000162,GO:0003674,GO:0003824,GO:0004048,GO:0004049,GO:0005575,GO:0005622,GO:0005623,GO:0005737,GO:0005950,GO:0006082,GO:0006520,GO:0006568,GO:0006576,GO:0006586,GO:0006725,GO:0006807,GO:0008150,GO:0008152,GO:0008652,GO:0009058,GO:0009072,GO:0009073,GO:0009308,GO:0009309,GO:0009987,GO:0016053,GO:0016740,GO:0016757,GO:0016763,GO:0016829,GO:0016830,GO:0016833,GO:0018130,GO:0019438,GO:0019752,GO:…	2.4.2.18,2.6.1.85,4.1.3.27	ko:K01658,ko:K01664,ko:K13497	ko00400,ko00405,ko00790,ko01100,ko01110,ko01130,ko01230,ko02024,ko02025,map00400,map00405,map00790,map01100,map01110,map01130,map01230,map02024,map02025	M00023	R00985,R00986,R01073,R01716	RC00010,RC00440,RC01418,RC02148,RC02414	ko00000,ko00001,ko00002,ko01000			iIT341.HP1281,iSBO_1134.SBO_1803,iSbBS512_1146.SbBS512_E1488,iYL1228.KPN_01256	Bacteria	1RAKJ@1224,1RREB@1236,3VZ2C@53335,COG0512@1,COG0512@2	NA|NA|NA	EH	anthranilate	PRINTS, PRINTS, PRINTS, PRINTS, PRINTS, PRINTS, Pfam, TIGRFAM, ProSiteProfiles, PANTHER, PANTHER, CDD, PRINTS, PRINTS, PRINTS, PRINTS, PRINTS, SUPERFAMILY, Gene3D	PR00097, PR00097, PR00097, PR00097, PR00097, PR00097, PF00117, TIGR00566, PS51273, PTHR43418:SF2, PTHR43418, cd01743, PR00096, PR00096, PR00096, PR00099, PR00099, SSF52317, G3DSA:3.40.50.880	Anthranilate synthase component II signature, Anthranilate synthase component II signature, Anthranilate synthase component II signature, Anthranilate synthase component II signature, Anthranilate synthase component II signature, Anthranilate synthase component II signature, Glutamine amidotransferase class-I, trpG_papA: glutamine amidotransferase of anthranilate synthase or aminodeoxychorismate …	IPR017926, IPR006221, IPR017926, IPR029062, IPR029062	Glutamine amidotransferase, Anthranilate synthase/para-aminobenzoate synthase like domain, Glutamine amidotransferase, Class I glutamine amidotransferase-like, Class I glutamine amidotransferase-like		KEGG: 00400+4.1.3.27|KEGG: 00405+4.1.3.27|MetaCyc: PWY-5958|MetaCyc: PWY-6660|MetaCyc: PWY-6661
NZ_CP050969.1_191_9	1248232.BANQ01000065_gene2139	2.4e-82	311.6	Vibrionales	ycfP	GO:0005575,GO:0005622,GO:0005623,GO:0005737,GO:0005829,GO:0044424,GO:0044444,GO:0044464		ko:K07000					ko00000				Bacteria	1NV1Y@1224,1RPQX@1236,1XUBH@135623,COG3150@1,COG3150@2	NA|NA|NA	S	Belongs to the UPF0227 family	PANTHER, SUPERFAMILY, Hamap, PANTHER, Gene3D, Pfam	PTHR35602:SF2, SSF53474, MF_01047, PTHR35602, G3DSA:3.40.50.1820, PF05728	UPF0227 protein YcfP [ycfP]., Uncharacterised protein family (UPF0227)	IPR029058, IPR022987, IPR008886, IPR029058, IPR008886	Alpha/Beta hydrolase fold, Uncharacterised protein family UPF0227, Uncharacterised protein family UPF0227/Esterase YqiA, Alpha/Beta hydrolase fold, Uncharacterised protein family UPF0227/Esterase YqiA
NZ_CP050969.1_191_90	1249634.D781_2419	1.4e-125	456.1	Serratia	trpD	GO:0000162,GO:0003674,GO:0003824,GO:0003921,GO:0003922,GO:0004048,GO:0004049,GO:0005575,GO:0005622,GO:0005623,GO:0005737,GO:0005950,GO:0006082,GO:0006139,GO:0006163,GO:0006164,GO:0006177,GO:0006520,GO:0006568,GO:0006576,GO:0006586,GO:0006725,GO:0006753,GO:0006793,GO:0006796,GO:0006807,GO:0008150,GO:0008152,GO:0008652,GO:0009058,GO:0009072,GO:0009073,GO:0009116,GO:0009117,GO:0009119,GO:0009123,GO:…	2.4.2.18,4.1.3.27	ko:K00766,ko:K13497	ko00400,ko01100,ko01110,ko01130,ko01230,map00400,map01100,map01110,map01130,map01230	M00023	R00985,R00986,R01073	RC00010,RC00440,RC02148,RC02414	ko00000,ko00001,ko00002,ko01000			iSBO_1134.SBO_1803,iSbBS512_1146.SbBS512_E1488,iYL1228.KPN_01256	Bacteria	1MUPV@1224,1RNXV@1236,3ZZNA@613,COG0547@1,COG0547@2	NA|NA|NA	F	Catalyzes the transfer of the phosphoribosyl group of 5- phosphorylribose-1-pyrophosphate (PRPP) to anthranilate to yield N-(5-phosphoribosyl)-anthranilate (PRA)	Gene3D, Gene3D, Hamap, TIGRFAM, Pfam, SUPERFAMILY, PANTHER, PANTHER, Pfam, SUPERFAMILY	G3DSA:1.20.970.10, G3DSA:3.40.1030.10, MF_00211, TIGR01245, PF00591, SSF47648, PTHR43418:SF2, PTHR43418, PF02885, SSF52418	Anthranilate phosphoribosyltransferase [trpD]., trpD: anthranilate phosphoribosyltransferase, Glycosyl transferase family, a/b domain, Glycosyl transferase family, helical bundle domain	IPR035902, IPR005940, IPR005940, IPR000312, IPR036320, IPR017459, IPR035902	Nucleoside phosphorylase/phosphoribosyltransferase catalytic domain superfamily, Anthranilate phosphoribosyl transferase, Anthranilate phosphoribosyl transferase, Glycosyl transferase, family 3, Glycosyl transferase family 3, N-terminal domain superfamily, Glycosyl transferase family 3, N-terminal domain, Nucleoside phosphorylase/phosphoribosyltransferase catalytic domain superfamily	GO:0000162, GO:0004048, GO:0000162, GO:0004048, GO:0016757,nan]	Reactome: R-HSA-73614|Reactome: R-HSA-73621, KEGG: 00400+2.4.2.18, KEGG: 00400+2.4.2.18, Reactome: R-HSA-73614|Reactome: R-HSA-73621, Reactome: R-HSA-73614|Reactome: R-HSA-73621, Reactome: R-HSA-73614|Reactome: R-HSA-73621, Reactome: R-HSA-73614|Reactome: R-HSA-73621
NZ_CP050969.1_191_91	1005999.GLGR_1233	1.9e-168	599	Gammaproteobacteria	trpF	GO:0000162,GO:0003674,GO:0003824,GO:0004425,GO:0004640,GO:0006082,GO:0006520,GO:0006568,GO:0006576,GO:0006586,GO:0006725,GO:0006807,GO:0008150,GO:0008152,GO:0008652,GO:0009058,GO:0009072,GO:0009073,GO:0009308,GO:0009309,GO:0009987,GO:0016053,GO:0016829,GO:0016830,GO:0016831,GO:0016853,GO:0016860,GO:0016861,GO:0018130,GO:0019438,GO:0019752,GO:0034641,GO:0042401,GO:0042430,GO:0042435,GO:0043436,GO:…	4.1.1.48,4.2.1.160,4.2.1.20,5.3.1.24	ko:K01609,ko:K01696,ko:K01817,ko:K13498,ko:K22100	ko00260,ko00400,ko00790,ko01100,ko01110,ko01130,ko01230,map00260,map00400,map00790,map01100,map01110,map01130,map01230	M00023,M00840	R00674,R02340,R02722,R03508,R03509,R11072	RC00209,RC00210,RC00700,RC00701,RC00944,RC00945,RC02868,RC03343	ko00000,ko00001,ko00002,ko01000			iJN678.trpF,iPC815.YPO2205,iSBO_1134.SBO_1804,iSDY_1059.SDY_1330	Bacteria	1MW5K@1224,1RNYH@1236,COG0134@1,COG0134@2,COG0135@1,COG0135@2	NA|NA|NA	E	Belongs to the TrpC family	Hamap, Gene3D, PANTHER, SUPERFAMILY, Pfam, SUPERFAMILY, Pfam, Hamap, Gene3D, CDD, ProSitePatterns, CDD	MF_00135, G3DSA:3.20.20.70, PTHR22854, SSF51366, PF00218, SSF51366, PF00697, MF_00134_B, G3DSA:3.20.20.70, cd00331, PS00614, cd00405	[\N-(5-phosphoribosyl)anthranilate isomerase [trpF].\", Indole-3-glycerol phosphate synthase, \"N-(5phosphoribosyl)anthranilate (PRA) isomerase\", Indole-3-glycerol phosphate synthase [trpC]., IGPS, Indole-3-glycerol phosphate synthase signature., PRAI"	IPR001240, IPR013785, IPR011060, IPR013798, IPR011060, IPR001240, IPR013798, IPR013785, IPR013798, IPR001468, IPR001240	[\N-(5phosphoribosyl) anthranilate isomerase (PRAI)\", Aldolase-type TIM barrel, Ribulose-phosphate binding barrel, Indole-3-glycerol phosphate synthase, Ribulose-phosphate binding barrel, \"N-(5phosphoribosyl) anthranilate isomerase (PRAI)\", Indole-3-glycerol phosphate synthase, Aldolase-type TIM barrel, Indole-3-glycerol phosphate synthase, Indole-3-glycerol phosphate synthase, conserved site,…	GO:0004640, GO:0006568, GO:0003824, GO:0003824, GO:0004425, GO:0003824, GO:0004640, GO:0006568, GO:0004425, GO:0003824, GO:0004425, GO:0004425, GO:0006568, GO:0004640, GO:0006568	KEGG: 00400+5.3.1.24, KEGG: 00400+4.1.1.48, KEGG: 00400+5.3.1.24, KEGG: 00400+4.1.1.48, KEGG: 00400+4.1.1.48, KEGG: 00400+4.1.1.48, KEGG: 00400+5.3.1.24
NZ_CP050969.1_191_92	1577887.JSYG01000015_gene2361	6.8e-199	699.9	Dickeya	trpB	GO:0000162,GO:0003674,GO:0003824,GO:0004834,GO:0005488,GO:0005515,GO:0005575,GO:0005622,GO:0005623,GO:0005737,GO:0005829,GO:0006082,GO:0006520,GO:0006568,GO:0006576,GO:0006586,GO:0006725,GO:0006807,GO:0008144,GO:0008150,GO:0008152,GO:0008652,GO:0009058,GO:0009072,GO:0009073,GO:0009308,GO:0009309,GO:0009987,GO:0016053,GO:0016829,GO:0016835,GO:0016836,GO:0018130,GO:0019438,GO:0019752,GO:0019842,GO:…	4.2.1.20	ko:K01696	ko00260,ko00400,ko01100,ko01110,ko01130,ko01230,map00260,map00400,map01100,map01110,map01130,map01230	M00023	R00674,R02340,R02722	RC00209,RC00210,RC00700,RC00701,RC02868	ko00000,ko00001,ko00002,ko01000			iECSF_1327.ECSF_1239,iPC815.YPO2204	Bacteria	1MUS8@1224,1RP4D@1236,2JBXB@204037,COG0133@1,COG0133@2	NA|NA|NA	E	The beta subunit is responsible for the synthesis of L- tryptophan from indole and L-serine	Gene3D, PIRSF, PANTHER, CDD, TIGRFAM, PANTHER, SUPERFAMILY, Hamap, Pfam, ProSitePatterns, Gene3D	G3DSA:3.40.50.1100, PIRSF001413, PTHR42882, cd06446, TIGR00263, PTHR42882:SF1, SSF53686, MF_00133, PF00291, PS00168, G3DSA:3.40.50.1100	Trp-synth_B, trpB: tryptophan synthase, beta subunit, Tryptophan synthase beta chain [trpB]., Pyridoxal-phosphate dependent enzyme, Tryptophan synthase beta chain pyridoxal-phosphate attachment site.	IPR023026, IPR006654, IPR006654, IPR006654, IPR036052, IPR023026, IPR001926, IPR006653	Tryptophan synthase beta chain/beta chain-like, Tryptophan synthase, beta chain, Tryptophan synthase, beta chain, Tryptophan synthase, beta chain, Tryptophan synthase beta subunit-like PLP-dependent enzyme, Tryptophan synthase beta chain/beta chain-like, Pyridoxal-phosphate dependent enzyme, Tryptophan synthase, beta chain, conserved site	GO:0000162, GO:0004834, GO:0004834, GO:0006568, GO:0004834, GO:0006568, GO:0004834, GO:0006568, GO:0000162, GO:0004834, GO:0004834, GO:0006568	KEGG: 00260+4.2.1.20|KEGG: 00400+4.2.1.20, KEGG: 00260+4.2.1.20|KEGG: 00400+4.2.1.20, KEGG: 00260+4.2.1.20|KEGG: 00400+4.2.1.20, KEGG: 00260+4.2.1.20|KEGG: 00400+4.2.1.20, KEGG: 00260+4.2.1.20|KEGG: 00400+4.2.1.20, KEGG: 00260+4.2.1.20|KEGG: 00400+4.2.1.20
NZ_CP050969.1_191_93	1080067.BAZH01000021_gene3004	3.5e-98	364.8	Citrobacter	trpA	GO:0000162,GO:0003674,GO:0003824,GO:0004834,GO:0005575,GO:0005622,GO:0005623,GO:0005737,GO:0005829,GO:0006082,GO:0006520,GO:0006568,GO:0006576,GO:0006586,GO:0006725,GO:0006807,GO:0008150,GO:0008152,GO:0008652,GO:0009058,GO:0009072,GO:0009073,GO:0009308,GO:0009309,GO:0009987,GO:0016053,GO:0016829,GO:0016835,GO:0016836,GO:0018130,GO:0019438,GO:0019752,GO:0034641,GO:0042401,GO:0042430,GO:0042435,GO:…	4.2.1.20	ko:K01695	ko00260,ko00400,ko01100,ko01110,ko01130,ko01230,map00260,map00400,map01100,map01110,map01130,map01230	M00023	R00674,R02340,R02722	RC00209,RC00210,RC00700,RC00701,RC02868	ko00000,ko00001,ko00002,ko01000			iECED1_1282.ECED1_1467,iECP_1309.ECP_1308	Bacteria	1MXJV@1224,1RMGN@1236,3WWIJ@544,COG0159@1,COG0159@2	NA|NA|NA	E	The alpha subunit is responsible for the aldol cleavage of indoleglycerol phosphate to indole and glyceraldehyde 3- phosphate	Gene3D, TIGRFAM, SUPERFAMILY, CDD, PANTHER, PANTHER, Pfam, Hamap	G3DSA:3.20.20.70, TIGR00262, SSF51366, cd04724, PTHR43406, PTHR43406:SF1, PF00290, MF_00131	trpA: tryptophan synthase, alpha subunit, Tryptophan_synthase_alpha, Tryptophan synthase alpha chain, Tryptophan synthase alpha chain [trpA].	IPR013785, IPR002028, IPR011060, IPR002028, IPR002028, IPR002028	Aldolase-type TIM barrel, Tryptophan synthase, alpha chain, Ribulose-phosphate binding barrel, Tryptophan synthase, alpha chain, Tryptophan synthase, alpha chain, Tryptophan synthase, alpha chain	GO:0003824, GO:0004834, GO:0006568, GO:0003824, GO:0004834, GO:0006568, GO:0004834, GO:0006568, GO:0004834, GO:0006568	KEGG: 00260+4.2.1.20|KEGG: 00400+4.2.1.20, KEGG: 00260+4.2.1.20|KEGG: 00400+4.2.1.20, KEGG: 00260+4.2.1.20|KEGG: 00400+4.2.1.20, KEGG: 00260+4.2.1.20|KEGG: 00400+4.2.1.20
NZ_CP050969.1_191_94	393305.YE2216A	3.8e-39	167.5	Yersinia	ykgJ			ko:K06940					ko00000				Bacteria	1N027@1224,1S949@1236,41GDT@629,COG0727@1,COG0727@2	NA|NA|NA	S	Putative zinc- or iron-chelating domain	Pfam	PF03692	Putative zinc- or iron-chelating domain	IPR005358	Putative zinc- or iron-chelating domain containing protein
NZ_CP050969.1_191_95	214092.YPO2199	4e-16	92	Yersinia	yciC	GO:0005575,GO:0005623,GO:0005886,GO:0016020,GO:0044464,GO:0071944											Bacteria	1PYD0@1224,1RQC3@1236,28JC8@1,2Z96Y@2,41D5Q@629	NA|NA|NA	S	UPF0259 membrane protein	Pfam	PF06790	Uncharacterised protein family (UPF0259)	IPR009627	Uncharacterised protein family UPF0259
NZ_CP050969.1_191_96	28152.DJ57_1385	3.9e-195	688	Yersinia	sulP			ko:K03321					ko00000,ko02000	2.A.53.3			Bacteria	1MWDF@1224,1SYC8@1236,41EHA@629,COG0659@1,COG0659@2	NA|NA|NA	U	Sulfate permease family protein	ProSiteProfiles, Pfam, SUPERFAMILY, PANTHER, CDD, Pfam, Gene3D	PS50801, PF01740, SSF52091, PTHR11814, cd07042, PF00916, G3DSA:3.30.750.24	STAS domain profile., STAS domain, STAS_SulP_like_sulfate_transporter, Sulfate permease family	IPR002645, IPR002645, IPR036513, IPR001902, IPR011547, IPR036513	STAS domain, STAS domain, STAS domain superfamily, SLC26A/SulP transporter, SLC26A/SulP transporter domain, STAS domain superfamily	GO:0008271, GO:0008272, GO:0016020, GO:0055085, GO:0008272, GO:0015116, GO:0016021
NZ_CP050969.1_191_97	1128421.JAGA01000003_gene3169	9.1e-159	567.4	unclassified Bacteria	ptrB	GO:0003674,GO:0003824,GO:0004175,GO:0004252,GO:0005575,GO:0005622,GO:0005623,GO:0005737,GO:0006508,GO:0006807,GO:0008150,GO:0008152,GO:0008233,GO:0008236,GO:0016787,GO:0017171,GO:0019538,GO:0043170,GO:0044238,GO:0044424,GO:0044464,GO:0070011,GO:0070012,GO:0071704,GO:0140096,GO:1901564	3.4.21.83	ko:K01354	ko05142,ko05143,map05142,map05143				ko00000,ko00001,ko01000,ko01002				Bacteria	2NNMF@2323,COG1770@1,COG1770@2	NA|NA|NA	E	Prolyl oligopeptidase, N-terminal beta-propeller domain	SUPERFAMILY, Pfam, SUPERFAMILY, PRINTS, PRINTS, PRINTS, PRINTS, PRINTS, PRINTS, Gene3D, PANTHER, Pfam, PANTHER, Gene3D	SSF50993, PF02897, SSF53474, PR00862, PR00862, PR00862, PR00862, PR00862, PR00862, G3DSA:2.130.10.120, PTHR11757, PF00326, PTHR11757:SF3, G3DSA:3.40.50.1820	Prolyl oligopeptidase, N-terminal beta-propeller domain, Prolyl oligopeptidase serine protease (S9A) signature, Prolyl oligopeptidase serine protease (S9A) signature, Prolyl oligopeptidase serine protease (S9A) signature, Prolyl oligopeptidase serine protease (S9A) signature, Prolyl oligopeptidase serine protease (S9A) signature, Prolyl oligopeptidase serine protease (S9A) signature, Prolyl oligo…	IPR023302, IPR029058, IPR002470, IPR002470, IPR002470, IPR002470, IPR002470, IPR002470, IPR001375, IPR029058	Peptidase S9A, N-terminal domain, Alpha/Beta hydrolase fold, Peptidase S9A, prolyl oligopeptidase, Peptidase S9A, prolyl oligopeptidase, Peptidase S9A, prolyl oligopeptidase, Peptidase S9A, prolyl oligopeptidase, Peptidase S9A, prolyl oligopeptidase, Peptidase S9A, prolyl oligopeptidase, Peptidase S9, prolyl oligopeptidase, catalytic domain, Alpha/Beta hydrolase fold	GO:0004252, GO:0070008, GO:0004252, GO:0006508, GO:0004252, GO:0006508, GO:0004252, GO:0006508, GO:0004252, GO:0006508, GO:0004252, GO:0006508, GO:0004252, GO:0006508, GO:0006508, GO:0008236
NZ_CP050969.1_191_98	1111728.ATYS01000008_gene1402	6.7e-111	407.1	Gammaproteobacteria	mmsB		1.1.1.31,1.1.1.60	ko:K00020,ko:K00042	ko00280,ko00630,ko01100,map00280,map00630,map01100		R01745,R01747,R05066	RC00099	ko00000,ko00001,ko01000				Bacteria	1MUGU@1224,1RQ2D@1236,COG2084@1,COG2084@2	NA|NA|NA	I	COG2084 3-hydroxyisobutyrate dehydrogenase and related beta-hydroxyacid dehydrogenases	SUPERFAMILY, PANTHER, Gene3D, ProSitePatterns, PANTHER, SUPERFAMILY, Pfam, PIRSF, Pfam, Gene3D	SSF48179, PTHR43060, G3DSA:3.40.50.720, PS00895, PTHR43060:SF11, SSF51735, PF14833, PIRSF000103, PF03446, G3DSA:1.10.1040.10	3-hydroxyisobutyrate dehydrogenase signature., NAD-binding of NADP-dependent 3-hydroxyisobutyrate dehydrogenase, NAD binding domain of 6-phosphogluconate dehydrogenase	IPR008927, IPR002204, IPR036291, IPR029154, IPR015815, IPR006115, IPR013328	6-phosphogluconate dehydrogenase-like, C-terminal domain superfamily, 3-hydroxyisobutyrate dehydrogenase-related, conserved site, NAD(P)-binding domain superfamily, 3-hydroxyisobutyrate dehydrogenase, NAD-binding domain, 3-hydroxyisobutyrate dehydrogenase-related, 6-phosphogluconate dehydrogenase, NADP-binding, 6-phosphogluconate dehydrogenase, domain 2	GO:0055114, GO:0016491, GO:0055114, GO:0051287, GO:0016491, GO:0055114, GO:0050661, GO:0016491, GO:0055114	Reactome: R-HSA-70895, Reactome: R-HSA-70895
NZ_CP050969.1_191_99	273526.SMDB11_1946	4e-64	251.1	Serratia	ispZ	GO:0005575,GO:0005623,GO:0005886,GO:0005887,GO:0016020,GO:0016021,GO:0031224,GO:0031226,GO:0044425,GO:0044459,GO:0044464,GO:0071944		ko:K06190					ko00000				Bacteria	1NWIZ@1224,1RQAB@1236,401G7@613,COG2917@1,COG2917@2	NA|NA|NA	D	probably involved in intracellular septation	PANTHER, TIGRFAM, Hamap, Pfam	PTHR36917, TIGR00997, MF_00189, PF04279	ispZ: intracellular septation protein A, Probable intracellular septation protein A [yciB]., Intracellular septation protein A	IPR006008, IPR006008, IPR006008, IPR006008	Intracellular septation protein A, Intracellular septation protein A, Intracellular septation protein A, Intracellular septation protein A	GO:0016021, GO:0016021, GO:0016021, GO:0016021
NZ_CP050969.1_192_1	1453496.AT03_08520	5.3e-87	327.8	Gammaproteobacteria	ompA	GO:0000746,GO:0003674,GO:0005215,GO:0005488,GO:0005515,GO:0005575,GO:0005623,GO:0005886,GO:0006810,GO:0006811,GO:0006950,GO:0006974,GO:0008150,GO:0009279,GO:0009597,GO:0009605,GO:0009607,GO:0009615,GO:0009987,GO:0015267,GO:0015288,GO:0016020,GO:0016021,GO:0016032,GO:0019058,GO:0019867,GO:0022803,GO:0022829,GO:0022857,GO:0030260,GO:0030312,GO:0030313,GO:0031224,GO:0031975,GO:0032991,GO:0033554,GO:…		ko:K03286,ko:K03640					ko00000,ko02000	1.B.6,2.C.1.2		iECIAI1_1343.ECIAI1_0998,iECNA114_1301.ECNA114_1035,iECSF_1327.ECSF_0871,iUTI89_1310.UTI89_C1022	Bacteria	1N6EM@1224,1RMJ7@1236,COG2885@1,COG2885@2,COG3637@1,COG3637@2	NA|NA|NA	M	Belongs to the ompA family	SUPERFAMILY, SUPERFAMILY, PRINTS, PRINTS, PRINTS, PRINTS, PRINTS, PRINTS, PRINTS, Gene3D, PANTHER, Pfam, ProSiteProfiles, Pfam, Gene3D, CDD, PRINTS, PRINTS, PRINTS, PANTHER	SSF56925, SSF103088, PR01022, PR01022, PR01022, PR01022, PR01022, PR01022, PR01022, G3DSA:3.30.1330.60, PTHR30128:SF30, PF00691, PS51123, PF01389, G3DSA:2.40.160.20, cd07185, PR01021, PR01021, PR01021, PTHR30128	Outer membrane protein A signature, Outer membrane protein A signature, Outer membrane protein A signature, Outer membrane protein A signature, Outer membrane protein A signature, Outer membrane protein A signature, Outer membrane protein A signature, OmpA family, OmpA-like domain profile., OmpA-like transmembrane domain, OmpA_C-like, OMPA domain signature, OMPA domain signature, OMPA domain sign…	IPR011250, IPR036737, IPR002368, IPR002368, IPR002368, IPR002368, IPR002368, IPR002368, IPR002368, IPR036737, IPR006665, IPR006665, IPR000498, IPR006665, IPR006664, IPR006664, IPR006664	Outer membrane protein/outer membrane enzyme PagP, beta-barrel, OmpA-like domain superfamily, Outer membrane protein, OmpA, Outer membrane protein, OmpA, Outer membrane protein, OmpA, Outer membrane protein, OmpA, Outer membrane protein, OmpA, Outer membrane protein, OmpA, Outer membrane protein, OmpA, OmpA-like domain superfamily, OmpA-like domain, OmpA-like domain, Outer membrane protein OmpA-l…	GO:0005198, GO:0009279, GO:0016021, GO:0005198, GO:0009279, GO:0016021, GO:0005198, GO:0009279, GO:0016021, GO:0005198, GO:0009279, GO:0016021, GO:0005198, GO:0009279, GO:0016021, GO:0005198, GO:0009279, GO:0016021, GO:0005198, GO:0009279, GO:0016021,GO:0009279, GO:0016021, GO:0009279, GO:0016021, GO:0009279, GO:0016021, GO:0009279, GO:0016021
NZ_CP050969.1_192_2	1249634.D781_1658	1.1e-37	162.9	Serratia	matP	GO:0003674,GO:0003676,GO:0003677,GO:0005488,GO:0005575,GO:0005622,GO:0005623,GO:0005694,GO:0006996,GO:0007059,GO:0008150,GO:0009987,GO:0016043,GO:0032991,GO:0032993,GO:0043226,GO:0043228,GO:0043229,GO:0043232,GO:0043565,GO:0044422,GO:0044424,GO:0044427,GO:0044446,GO:0044464,GO:0051276,GO:0051301,GO:0071840,GO:0097047,GO:0097159,GO:1901363		ko:K09911					ko00000				Bacteria	1RA57@1224,1S28S@1236,400MZ@613,COG3120@1,COG3120@2	NA|NA|NA	D	Required for spatial organization of the terminus region of the chromosome (Ter macrodomain) during the cell cycle. Prevents early segregation of duplicated Ter macrodomains during cell division. Binds specifically to matS, which is a 13 bp signature motif repeated within the Ter macrodomain	Gene3D, ProDom, Pfam, Coils, Gene3D, Pfam	G3DSA:1.20.1270.380, PD033720, PF17414, Coil, G3DSA:1.10.1220.10, PF06303	UPF0268 YCBG DEHYDROGENASE PM0482 PBPRA1775 PLU1774 YPO1433/Y2737/YP0877 VV1664 HI1323 HD0178, MatP C-terminal ribbon-helix-helix domain, MatP N-terminal domain	IPR038339, IPR009390, IPR035375, IPR013321, IPR035087	MatP, N-terminal domain superfamily, Macrodomain Ter protein, MatP, MatP, C-terminal ribbon-helix-helix domain, Arc-type ribbon-helix-helix, MatP, N-terminal	GO:0043565, GO:0006355
NZ_CP050969.1_192_3	399741.Spro_1752	2.4e-187	662.1	Serratia	ycbZ			ko:K04770					ko00000,ko01000,ko01002				Bacteria	1MWGB@1224,1RMPC@1236,4005S@613,COG1067@1,COG1067@2	NA|NA|NA	O	Belongs to the peptidase S16 family	PANTHER, Pfam, Gene3D, PANTHER, Gene3D, SUPERFAMILY, PRINTS, PRINTS, PRINTS, PRINTS, Pfam, ProSiteProfiles	PTHR10046, PF13654, G3DSA:3.40.50.300, PTHR10046:SF49, G3DSA:3.30.230.10, SSF54211, PR00830, PR00830, PR00830, PR00830, PF05362, PS51786	AAA domain,Endopeptidase La (Lon) serine protease (S16) signature, Endopeptidase La (Lon) serine protease (S16) signature, Endopeptidase La (Lon) serine protease (S16) signature, Endopeptidase La (Lon) serine protease (S16) signature, Lon protease (S16) C-terminal proteolytic domain, Lon proteolytic domain profile.	IPR027065, IPR014721, IPR020568,IPR008269, IPR008269	Lon protease, Ribosomal protein S5 domain 2-type fold, subgroup, Ribosomal protein S5 domain 2-type fold,Peptidase S16, Lon proteolytic domain, Peptidase S16, Lon proteolytic domain	GO:0004176, GO:0004252, GO:0005524, GO:0030163,GO:0004176, GO:0004252, GO:0006508, GO:0004176, GO:0004252, GO:0006508
NZ_CP050969.1_192_4	1224318.DT73_10445	1.3e-82	312.4	Gammaproteobacteria	fabA	GO:0003674,GO:0003824,GO:0005575,GO:0005622,GO:0005623,GO:0005737,GO:0005829,GO:0006082,GO:0006629,GO:0006631,GO:0006633,GO:0008150,GO:0008152,GO:0008610,GO:0008693,GO:0009058,GO:0009987,GO:0016053,GO:0016829,GO:0016835,GO:0016836,GO:0016853,GO:0016860,GO:0016863,GO:0019171,GO:0019752,GO:0032787,GO:0034017,GO:0043436,GO:0044237,GO:0044238,GO:0044249,GO:0044255,GO:0044281,GO:0044283,GO:0044424,GO:…	4.2.1.59,5.3.3.14	ko:K01716	ko00061,ko01100,ko01212,map00061,map01100,map01212	M00083	R04428,R04535,R04537,R04544,R04568,R04954,R04965,R07639	RC00831,RC01078,RC01095	ko00000,ko00001,ko00002,ko01000,ko01004			iAF1260.b0954,iB21_1397.B21_00965,iBWG_1329.BWG_0806,iE2348C_1286.E2348C_0940,iEC042_1314.EC042_1039,iECBD_1354.ECBD_2641,iECB_1328.ECB_00958,iECDH10B_1368.ECDH10B_1024,iECD_1391.ECD_00958,iECED1_1282.ECED1_0977,iECH74115_1262.ECH74115_1118,iECIAI1_1343.ECIAI1_0995,iECIAI39_1322.ECIAI39_2193,iECNA114_1301.ECNA114_1032,iECO103_1326.ECO103_1000,iECO111_1330.ECO111_1022,iECO26_1355.ECO26_1081,iECOK1…	Bacteria	1MWV8@1224,1RP6W@1236,COG0764@1,COG0764@2	NA|NA|NA	I	Necessary for the introduction of cis unsaturation into fatty acids. Catalyzes the dehydration of (3R)-3-hydroxydecanoyl- ACP to E-(2)-decenoyl-ACP and then its isomerization to Z-(3)- decenoyl-ACP. Can catalyze the dehydratase reaction for beta- hydroxyacyl-ACPs with saturated chain lengths up to 16 0, being most active on intermediate chain length	PANTHER, TIGRFAM, Hamap, Pfam, PANTHER, SUPERFAMILY, CDD, Gene3D	PTHR30272, TIGR01749, MF_00405, PF07977, PTHR30272:SF8, SSF54637, cd01287, G3DSA:3.10.129.10	fabA: beta-hydroxyacyl-(acyl-carrier-protein) dehydratase FabA, 3-hydroxydecanoyl-[acyl-carrier-protein] dehydratase [fabA]., FabA-like domain, FabA	IPR010083, IPR010083, IPR013114, IPR010083, IPR029069, IPR010083	Beta-hydroxyacyl-(acyl-carrier-protein) dehydratase FabA, Beta-hydroxyacyl-(acyl-carrier-protein) dehydratase FabA, Beta-hydroxydecanoyl thiol ester dehydrase, FabA/FabZ, Beta-hydroxyacyl-(acyl-carrier-protein) dehydratase FabA, HotDog domain superfamily, Beta-hydroxyacyl-(acyl-carrier-protein) dehydratase FabA	GO:0005737, GO:0006633, GO:0008693, GO:0005737, GO:0006633, GO:0008693, GO:0005737, GO:0006633, GO:0008693, GO:0005737, GO:0006633, GO:0008693	KEGG: 00061+4.2.1.59+5.3.3.14|KEGG: 00780+4.2.1.59|MetaCyc: PWY-5971|MetaCyc: PWY-5973|MetaCyc: PWY-5989|MetaCyc: PWY-5994|MetaCyc: PWY-6113|MetaCyc: PWY-6282|MetaCyc: PWY-6519|MetaCyc: PWY-7388|MetaCyc: PWY-7663|MetaCyc: PWY-7664|MetaCyc: PWY-7858|MetaCyc: PWYG-321, KEGG: 00061+4.2.1.59+5.3.3.14|KEGG: 00780+4.2.1.59|MetaCyc: PWY-5971|MetaCyc: PWY-5973|MetaCyc: PWY-5989|MetaCyc: PWY-5994|MetaCyc:…
NZ_CP050969.1_194_1	489653.NLA_1240	1.6e-51	209.5	Betaproteobacteria													Bacteria	1MVUE@1224,2WG3W@28216,COG4245@1,COG4245@2	NA|NA|NA	S	von Willebrand factor type A domain	SMART, SUPERFAMILY, PANTHER, ProSiteProfiles, PANTHER, PIRSF, Pfam, Gene3D	SM00327, SSF53300, PTHR10579:SF92, PS50234, PTHR10579, PIRSF020634, PF00092, G3DSA:3.40.50.410	VWFA domain profile., von Willebrand factor type A domain	IPR002035, IPR036465, IPR002035, IPR011392, IPR002035, IPR036465	von Willebrand factor, type A, von Willebrand factor A-like domain superfamily, von Willebrand factor, type A, Tellurite resistance, TerY, von Willebrand factor, type A, von Willebrand factor A-like domain superfamily
NZ_CP050969.1_194_10	1278309.KB907102_gene200	1.2e-140	506.5	Oceanospirillales	srmB	GO:0003674,GO:0003724,GO:0003824,GO:0004004,GO:0004386,GO:0005575,GO:0005622,GO:0005623,GO:0005737,GO:0008026,GO:0008104,GO:0008150,GO:0008186,GO:0016462,GO:0016787,GO:0016817,GO:0016818,GO:0016887,GO:0017111,GO:0032991,GO:0033036,GO:0035770,GO:0036464,GO:0042623,GO:0043186,GO:0043226,GO:0043228,GO:0043229,GO:0043232,GO:0044424,GO:0044444,GO:0044464,GO:0045495,GO:0051179,GO:0060293,GO:0070035,GO:…	3.6.4.13	ko:K11927	ko03018,map03018				ko00000,ko00001,ko01000,ko03019				Bacteria	1MU49@1224,1RMWA@1236,1XI8E@135619,COG0513@1,COG0513@2	NA|NA|NA	L	Belongs to the DEAD box helicase family	PANTHER, ProSiteProfiles, ProSiteProfiles, MobiDBLite, Gene3D, Pfam, ProSitePatterns, PANTHER, MobiDBLite, CDD, Gene3D, MobiDBLite, CDD, SUPERFAMILY, Pfam, SMART, ProSiteProfiles, SMART	PTHR24031, PS51194, PS51192, mobidb-lite, G3DSA:3.40.50.300, PF00271, PS00039, PTHR24031:SF540, mobidb-lite, cd00079, G3DSA:3.40.50.300, mobidb-lite, cd00268, SSF52540, PF00270, SM00487, PS51195, SM00490	Superfamilies 1 and 2 helicase C-terminal domain profile., Superfamilies 1 and 2 helicase ATP-binding type-1 domain profile., consensus disorder prediction, Helicase conserved C-terminal domain, DEAD-box subfamily ATP-dependent helicases signature., consensus disorder prediction, HELICc, consensus disorder prediction, DEADc, DEAD/DEAH box helicase, DEAD-box RNA helicase Q motif profile.	IPR001650, IPR014001, IPR001650, IPR000629, IPR001650, IPR027417, IPR011545, IPR014001, IPR014014, IPR001650	Helicase, C-terminal, Helicase superfamily 1/2, ATP-binding domain, Helicase, C-terminal, ATP-dependent RNA helicase DEAD-box, conserved site, Helicase, C-terminal, P-loop containing nucleoside triphosphate hydrolase, DEAD/DEAH box helicase domain, Helicase superfamily 1/2, ATP-binding domain, RNA helicase, DEAD-box type, Q motif, Helicase, C-terminal	GO:0003676, GO:0005524
NZ_CP050969.1_194_11	1441930.Z042_25130	1.9e-213	748.4	Serratia	pntB		1.6.1.2	ko:K00325	ko00760,ko01100,map00760,map01100		R00112	RC00001	ko00000,ko00001,ko01000				Bacteria	1MUP4@1224,1RMR4@1236,3ZZVB@613,COG1282@1,COG1282@2	NA|NA|NA	C	The transhydrogenation between NADH and NADP is coupled to respiration and ATP hydrolysis and functions as a proton pump across the membrane	SUPERFAMILY, PANTHER, PIRSF, Gene3D, Pfam, PANTHER	SSF52467, PTHR44758, PIRSF000204, G3DSA:3.40.50.1220, PF02233, PTHR44758:SF1	NAD(P) transhydrogenase beta subunit	IPR029035, IPR012136, IPR034300	DHS-like NAD/FAD-binding domain superfamily, NADP transhydrogenase, beta subunit, NADP transhydrogenase beta-like domain	GO:0008750, GO:0016021, GO:0050661, GO:0055114	KEGG: 00760+1.6.1.2, KEGG: 00760+1.6.1.2|Reactome: R-HSA-71403
NZ_CP050969.1_194_12	1332071.L581_3866	5.3e-228	797	Serratia	pntA	GO:0000166,GO:0003674,GO:0003824,GO:0005488,GO:0005515,GO:0005575,GO:0005623,GO:0005886,GO:0005887,GO:0006139,GO:0006725,GO:0006732,GO:0006733,GO:0006739,GO:0006740,GO:0006753,GO:0006793,GO:0006796,GO:0006807,GO:0008150,GO:0008152,GO:0008746,GO:0008750,GO:0009117,GO:0009987,GO:0016020,GO:0016021,GO:0016491,GO:0016651,GO:0016652,GO:0019362,GO:0019637,GO:0031224,GO:0031226,GO:0034641,GO:0036094,GO:…	1.6.1.2	ko:K00324	ko00760,ko01100,map00760,map01100		R00112	RC00001	ko00000,ko00001,ko01000				Bacteria	1MVXU@1224,1RN23@1236,400GA@613,COG3288@1,COG3288@2	NA|NA|NA	C	The transhydrogenation between NADH and NADP is coupled to respiration and ATP hydrolysis and functions as a proton pump across the membrane	PIRSF, TIGRFAM, ProSitePatterns, Gene3D, Pfam, ProSitePatterns, CDD, SMART, Gene3D, SMART, PANTHER, SUPERFAMILY, PANTHER, Pfam, SUPERFAMILY, Pfam	PIRSF000203, TIGR00561, PS00836, G3DSA:3.40.50.720, PF12769, PS00837, cd05304, SM01002, G3DSA:3.40.50.720, SM01003, PTHR10160:SF19, SSF51735, PTHR10160, PF01262, SSF52283, PF05222	pntA: NAD(P)(+) transhydrogenase (AB-specific), alpha subunit, Alanine dehydrogenase & pyridine nucleotide transhydrogenase signature 1., 4TM region of pyridine nucleotide transhydrogenase, mitoch, Alanine dehydrogenase & pyridine nucleotide transhydrogenase signature 2., Rubrum_tdh, Alanine dehydrogenase/PNT, C-terminal domain, Alanine dehydrogenase/PNT, N-terminal domain	IPR026255, IPR026255, IPR008142, IPR024605, IPR008143, IPR007698, IPR007886, IPR036291, IPR007698, IPR007886	NAD(P) transhydrogenase, alpha subunit, NAD(P) transhydrogenase, alpha subunit, Alanine dehydrogenase/NAD(P) transhydrogenase, conserved site-1, NAD(P) transhydrogenase, alpha subunit, C-terminal, Alanine dehydrogenase/pyridine nucleotide transhydrogenase, conserved site-2, Alanine dehydrogenase/pyridine nucleotide transhydrogenase, NAD(H)-binding domain, Alanine dehydrogenase/pyridine nucleotide…	GO:0008746, GO:0055114, GO:1902600, GO:0008746, GO:0055114, GO:1902600, GO:0016491, GO:0055114, GO:0016491, GO:0055114,nan]	KEGG: 00760+1.6.1.2|Reactome: R-HSA-71403, KEGG: 00760+1.6.1.2|Reactome: R-HSA-71403, Reactome: R-HSA-71403, KEGG: 00760+1.6.1.2|Reactome: R-HSA-71403, KEGG: 00250+1.4.1.1|KEGG: 00430+1.4.1.1|Reactome: R-HSA-71403,nan]
NZ_CP050969.1_194_13	675817.VDA_002080	1.3e-29	136.7	Vibrionales	VP1605												Bacteria	1QJDQ@1224,1THCV@1236,1XU2R@135623,2AM7R@1,31C2D@2	NA|NA|NA			NA	NA	NA	NA	NA	NA	NA
NZ_CP050969.1_194_14	1216966.BAUC01000001_gene1831	1.1e-262	912.5	Gammaproteobacteria	prc	GO:0003674,GO:0003824,GO:0004175,GO:0005575,GO:0005623,GO:0005886,GO:0006508,GO:0006807,GO:0007154,GO:0007165,GO:0008150,GO:0008152,GO:0008233,GO:0009056,GO:0009057,GO:0009987,GO:0016020,GO:0016787,GO:0019538,GO:0023052,GO:0030163,GO:0030288,GO:0030313,GO:0031975,GO:0042221,GO:0042597,GO:0043170,GO:0044238,GO:0044464,GO:0046677,GO:0050789,GO:0050794,GO:0050896,GO:0051716,GO:0065007,GO:0070011,GO:…	3.4.21.102	ko:K03797					ko00000,ko01000,ko01002				Bacteria	1MU39@1224,1RMSR@1236,COG0793@1,COG0793@2	NA|NA|NA	M	Belongs to the peptidase S41A family	SMART, Pfam, ProSiteProfiles, Coils, SUPERFAMILY, Gene3D, TIGRFAM, ProSiteProfiles, Pfam, PANTHER, Gene3D, CDD, SUPERFAMILY, Pfam, Coils, CDD, PANTHER, SMART	SM00228, PF03572, PS51257, Coil, SSF50156, G3DSA:2.30.42.10, TIGR00225, PS50106, PF00595, PTHR32060, G3DSA:3.90.226.10, cd00988, SSF52096, PF11818, Coil, cd07560, PTHR32060:SF20, SM00245	Peptidase family S41, Prokaryotic membrane lipoprotein lipid attachment site profile., prc: C-terminal processing peptidase, PDZ domain profile., PDZ domain (Also known as DHR or GLGF), PDZ_CTP_protease, C-terminal domain of tail specific protease (DUF3340), Peptidase_S41_CPP	IPR001478, IPR005151, IPR036034, IPR004447, IPR001478, IPR001478, IPR029045, IPR020992, IPR004447, IPR005151	PDZ domain, Tail specific protease, PDZ superfamily, C-terminal-processing peptidase S41A, PDZ domain, PDZ domain, ClpP/crotonase-like domain superfamily, Tail specific protease, C-terminal, C-terminal-processing peptidase S41A, Tail specific protease	GO:0005515, GO:0006508, GO:0008236, GO:0005515, GO:0006508, GO:0008236, GO:0005515, GO:0005515, GO:0006508, GO:0008236, GO:0006508, GO:0008236	Reactome: R-HSA-2187335|Reactome: R-HSA-2453902, Reactome: R-HSA-2187335|Reactome: R-HSA-2453902
NZ_CP050969.1_194_15	1344012.ATMI01000041_gene451	2.3e-63	248.8	Tatumella	proQ	GO:0003674,GO:0003676,GO:0003723,GO:0003725,GO:0003727,GO:0003729,GO:0003730,GO:0005488,GO:0005575,GO:0005622,GO:0005623,GO:0005737,GO:0005829,GO:0006950,GO:0006970,GO:0006972,GO:0006974,GO:0007154,GO:0007165,GO:0007231,GO:0008150,GO:0009628,GO:0009651,GO:0009987,GO:0010468,GO:0010608,GO:0010958,GO:0019222,GO:0023052,GO:0032879,GO:0032890,GO:0032892,GO:0033554,GO:0033592,GO:0034057,GO:0034762,GO:…		ko:K03607					ko00000				Bacteria	1N68T@1224,1RP4S@1236,4BTY7@82986,COG3109@1,COG3109@2	NA|NA|NA	T	RNA chaperone with significant RNA binding, RNA strand exchange and RNA duplexing activities. May regulate ProP activity through an RNA-based, post-transcriptional mechanism	SUPERFAMILY, Gene3D, Hamap, SMART, MobiDBLite, MobiDBLite, Pfam, Pfam, PANTHER, Coils, MobiDBLite	SSF48657, G3DSA:1.10.1710.10, MF_00749, SM00945, mobidb-lite, mobidb-lite, PF17516, PF04352, PTHR38106, Coil, mobidb-lite	RNA chaperone ProQ [proQ]., consensus disorder prediction, consensus disorder prediction, ProQ C-terminal domain, ProQ/FINO family, consensus disorder prediction	IPR036442, IPR036442, IPR023529, IPR016103, IPR035236, IPR016103, IPR023529	ProQ/FinO domain superfamily, ProQ/FinO domain superfamily, RNA chaperone ProQ, ProQ/FinO domain, RNA chaperone ProQ, C-terminal, ProQ/FinO domain, RNA chaperone ProQ	GO:0003723, GO:0010608, GO:0033592, GO:0034057, GO:0003723, GO:0010608, GO:0033592, GO:0034057
NZ_CP050969.1_194_16	82996.sch_11465	2.2e-52	211.8	Serratia	yebR	GO:0003674,GO:0003824,GO:0005575,GO:0005622,GO:0005623,GO:0005737,GO:0005829,GO:0008150,GO:0008152,GO:0016491,GO:0016667,GO:0016671,GO:0033745,GO:0044424,GO:0044444,GO:0044464,GO:0055114	1.8.4.14	ko:K08968	ko00270,map00270		R02025	RC00639	ko00000,ko00001,ko01000				Bacteria	1RDBM@1224,1S6QU@1236,401VT@613,COG1956@1,COG1956@2	NA|NA|NA	T	GAF domain	SUPERFAMILY, Gene3D, PANTHER, SMART, Pfam, ProSitePatterns, PANTHER	SSF55781, G3DSA:3.30.450.40, PTHR21021, SM00065, PF13185, PS01320, PTHR21021:SF15	GAF domain, Uncharacterized protein family UPF0067 signature.	IPR029016, IPR003018, IPR003018, IPR000614	GAF-like domain superfamily, GAF domain, GAF domain, Free Met sulfoxide reductase conserved site	GO:0005515, GO:0005515
NZ_CP050969.1_194_17	393305.YE1865	3.4e-116	425.2	Yersinia	yebS	GO:0005575,GO:0005623,GO:0005886,GO:0005887,GO:0006950,GO:0008150,GO:0009266,GO:0009408,GO:0009628,GO:0016020,GO:0016021,GO:0031224,GO:0031226,GO:0044425,GO:0044459,GO:0044464,GO:0050896,GO:0071944		ko:K03808					ko00000				Bacteria	1MWG1@1224,1RM9Z@1236,41F0H@629,COG2995@1,COG2995@2	NA|NA|NA	S	Paraquat-inducible protein A	PANTHER, TIGRFAM, PANTHER, Pfam, Pfam	PTHR30462:SF1, TIGR00155, PTHR30462, PF04403, PF04403	pqiA_fam: integral membrane protein, PqiA family, Paraquat-inducible protein A, Paraquat-inducible protein A	IPR005219, IPR007498, IPR007498	Intermembrane transport protein PqiA-like, Enterobacteria-type, Intermembrane transport protein PqiA-like, Intermembrane transport protein PqiA-like
NZ_CP050969.1_194_18	1332071.L581_0216	1.2e-288	999.2	Serratia	yebT	GO:0003674,GO:0005488,GO:0005515,GO:0005575,GO:0005623,GO:0005886,GO:0005887,GO:0006810,GO:0006869,GO:0008150,GO:0009987,GO:0010876,GO:0016020,GO:0016021,GO:0016043,GO:0030288,GO:0030313,GO:0031224,GO:0031226,GO:0031975,GO:0033036,GO:0042597,GO:0042802,GO:0044425,GO:0044459,GO:0044464,GO:0051179,GO:0051234,GO:0061024,GO:0071702,GO:0071840,GO:0071944,GO:0120009		ko:K06192					ko00000				Bacteria	1MU1T@1224,1RN89@1236,3ZZKE@613,COG3008@1,COG3008@2	NA|NA|NA	Q	MlaD protein	Pfam, Pfam, Pfam, Pfam, Pfam, PANTHER, PANTHER	PF02470, PF02470, PF02470, PF02470, PF02470, PTHR30462, PTHR30462:SF0	MlaD protein, MlaD protein, MlaD protein, MlaD protein, MlaD protein	IPR003399, IPR003399, IPR003399, IPR003399, IPR003399	Mce/MlaD, Mce/MlaD, Mce/MlaD, Mce/MlaD, Mce/MlaD
NZ_CP050969.1_194_2	32057.KB217483_gene10130	2.6e-56	226.1	Nostocales				ko:K11130	ko03008,map03008	M00425			ko00000,ko00001,ko00002,ko03009,ko03032				Bacteria	1G1D0@1117,1HJ43@1161,COG4248@1,COG4248@2	NA|NA|NA	S	PFAM Protein kinase domain	Gene3D, SUPERFAMILY, PANTHER, ProSitePatterns, ProSiteProfiles, Pfam	G3DSA:1.10.510.10, SSF56112, PTHR24347, PS00290, PS50011, PF00069	Immunoglobulins and major histocompatibility complex proteins signature., Protein kinase domain profile., Protein kinase domain	IPR011009, IPR003006, IPR000719, IPR000719	Protein kinase-like domain superfamily, Immunoglobulin/major histocompatibility complex, conserved site, Protein kinase domain, Protein kinase domain	GO:0004672, GO:0005524, GO:0006468, GO:0004672, GO:0005524, GO:0006468
NZ_CP050969.1_194_3	298386.PBPRB0829	3.7e-59	234.6	Vibrionales	ycdZ	GO:0005575,GO:0005623,GO:0005886,GO:0016020,GO:0044464,GO:0071944											Bacteria	1RA69@1224,1S1YX@1236,1XWYY@135623,28NYX@1,2ZBVY@2	NA|NA|NA	S	Protein of unknown function (DUF1097)	Pfam	PF06496	Protein of unknown function (DUF1097)	IPR009476	Protein of unknown function DUF1097
NZ_CP050969.1_194_4	1332071.L581_1671	1.9e-47	195.7	Serratia	zapC	GO:0003674,GO:0005488,GO:0005515,GO:0005575,GO:0005623,GO:0008150,GO:0032153,GO:0042802,GO:0044464,GO:0050789,GO:0050794,GO:0051302,GO:0065007		ko:K18657					ko00000,ko03036				Bacteria	1N1DT@1224,1RYK3@1236,28I7M@1,2Z8AH@2,3ZZSP@613	NA|NA|NA	D	Contributes to the efficiency of the cell division process by stabilizing the polymeric form of the cell division protein FtsZ. Acts by promoting interactions between FtsZ protofilaments and suppressing the GTPase activity of FtsZ	PIRSF, Hamap, Pfam	PIRSF010252, MF_00906, PF07126	Cell division protein ZapC [zapC]., Cell-division protein ZapC	IPR009809, IPR009809, IPR009809	Cell division protein ZapC, Cell division protein ZapC, Cell division protein ZapC
NZ_CP050969.1_194_5	1249634.D781_1646	2.8e-153	548.1	Serratia	pyrD	GO:0000166,GO:0003674,GO:0003824,GO:0004152,GO:0004158,GO:0005488,GO:0005575,GO:0005622,GO:0005623,GO:0005737,GO:0005829,GO:0005886,GO:0006139,GO:0006206,GO:0006207,GO:0006220,GO:0006221,GO:0006725,GO:0006753,GO:0006793,GO:0006796,GO:0006807,GO:0008150,GO:0008152,GO:0009058,GO:0009112,GO:0009117,GO:0009165,GO:0009218,GO:0009220,GO:0009259,GO:0009260,GO:0009987,GO:0010181,GO:0016020,GO:0016491,GO:…	1.3.1.14,1.3.5.2	ko:K00254,ko:K02823,ko:K17828	ko00240,ko01100,map00240,map01100	M00051	R01868,R01869	RC00051	ko00000,ko00001,ko00002,ko01000			iEC042_1314.EC042_1029,iECIAI39_1322.ECIAI39_2202,iECUMN_1333.ECUMN_1134,iEcSMS35_1347.EcSMS35_2174,iPC815.YPO1415,iYL1228.KPN_00974	Bacteria	1MU7C@1224,1RMCP@1236,40105@613,COG0167@1,COG0167@2	NA|NA|NA	F	Catalyzes the conversion of dihydroorotate to orotate with quinone as electron acceptor	SUPERFAMILY, CDD, ProSitePatterns, TIGRFAM, PIRSF, PANTHER, Hamap, Gene3D, ProSitePatterns, Pfam	SSF51395, cd04738, PS00911, TIGR01036, PIRSF000164, PTHR43517, MF_00225, G3DSA:3.20.20.70, PS00912, PF01180	DHOD_2_like, Dihydroorotate dehydrogenase signature 1., pyrD_sub2: dihydroorotate dehydrogenase (fumarate), Dihydroorotate dehydrogenase (quinone) [pyrD]., Dihydroorotate dehydrogenase signature 2., Dihydroorotate dehydrogenase	IPR005719, IPR001295, IPR005719, IPR012135, IPR005719, IPR013785, IPR001295, IPR005720	Dihydroorotate dehydrogenase, class 2, Dihydroorotate dehydrogenase, conserved site, Dihydroorotate dehydrogenase, class 2, Dihydroorotate dehydrogenase, class 1/ 2, Dihydroorotate dehydrogenase, class 2, Aldolase-type TIM barrel, Dihydroorotate dehydrogenase, conserved site, Dihydroorotate dehydrogenase domain	GO:0004152, GO:0006207, GO:0016020, GO:0055114, GO:0004152, GO:0006207, GO:0055114, GO:0004152, GO:0006207, GO:0016020, GO:0055114, GO:0004152, GO:0006222, GO:0055114, GO:0004152, GO:0006207, GO:0016020, GO:0055114, GO:0003824, GO:0004152, GO:0006207, GO:0055114, GO:0005737, GO:0016627, GO:0055114	KEGG: 00240+1.3.5.2|MetaCyc: PWY-5686|Reactome: R-HSA-500753, Reactome: R-HSA-500753, KEGG: 00240+1.3.5.2|MetaCyc: PWY-5686|Reactome: R-HSA-500753, KEGG: 00240+1.3.5.2|MetaCyc: PWY-5686|Reactome: R-HSA-500753, Reactome: R-HSA-500753
NZ_CP050969.1_194_7	1453496.AT03_08440	0	1303.1	Gammaproteobacteria	pepN	GO:0003674,GO:0003824,GO:0004177,GO:0005488,GO:0005515,GO:0005575,GO:0005622,GO:0005623,GO:0005737,GO:0005886,GO:0006508,GO:0006518,GO:0006807,GO:0008150,GO:0008152,GO:0008233,GO:0008235,GO:0008237,GO:0008238,GO:0008270,GO:0009056,GO:0009987,GO:0016020,GO:0016787,GO:0019538,GO:0033218,GO:0034641,GO:0042277,GO:0042802,GO:0043167,GO:0043169,GO:0043170,GO:0043171,GO:0043603,GO:0044237,GO:0044238,GO:…	3.4.11.2	ko:K01256	ko00480,ko01100,map00480,map01100		R00899,R04951	RC00096,RC00141	ko00000,ko00001,ko01000,ko01002			iECIAI1_1343.ECIAI1_0973,iECO103_1326.ECO103_0977,iECP_1309.ECP_0944,iECSE_1348.ECSE_0993,iECW_1372.ECW_m1042,iEKO11_1354.EKO11_2898,iWFL_1372.ECW_m1042	Bacteria	1MUCI@1224,1RMA7@1236,COG0308@1,COG0308@2	NA|NA|NA	E	aminopeptidase N	Gene3D, PANTHER, Pfam, PANTHER, Gene3D, Gene3D, TIGRFAM, SUPERFAMILY, Pfam, PRINTS, PRINTS, PRINTS, PRINTS, PRINTS, CDD, Gene3D, Pfam, Gene3D, SUPERFAMILY	G3DSA:2.60.40.1730, PTHR11533, PF11940, PTHR11533:SF208, G3DSA:1.25.50.10, G3DSA:1.10.1740.60, TIGR02414, SSF55486, PF01433, PR00756, PR00756, PR00756, PR00756, PR00756, cd09600, G3DSA:1.10.390.10, PF17432, G3DSA:2.60.40.1840, SSF63737	Domain of unknown function (DUF3458) Ig-like fold, pepN_proteo: aminopeptidase N, Peptidase family M1 domain, Membrane alanyl dipeptidase (M1) family signature, Membrane alanyl dipeptidase (M1) family signature, Membrane alanyl dipeptidase (M1) family signature, Membrane alanyl dipeptidase (M1) family signature, Membrane alanyl dipeptidase (M1) family signature, M1_APN_1, Domain of unknown functi…	IPR001930, IPR035414, IPR037144, IPR012779, IPR014782, IPR014782, IPR014782, IPR014782, IPR014782, IPR014782, IPR012779, IPR027268, IPR024601, IPR038438	Peptidase M1, alanine aminopeptidase/leukotriene A4 hydrolase, Peptidase M1, alanyl aminopeptidase, Ig-like fold, Peptidase M1, alanyl aminopeptidase, C-terminal domain superfamily, Peptidase M1, alanyl aminopeptidase, Peptidase M1, membrane alanine aminopeptidase, N-terminal, Peptidase M1, membrane alanine aminopeptidase, N-terminal, Peptidase M1, membrane alanine aminopeptidase, N-terminal, Pep…	GO:0006508,GO:0008270, GO:0008237, GO:0008270, GO:0008237, GO:0008270, GO:0008237, GO:0008270, GO:0008237, GO:0008270, GO:0008237, GO:0008270, GO:0008237, GO:0008270, GO:0008270, nan]
NZ_CP050969.1_194_8	1283284.AZUK01000002_gene2987	1.7e-59	235.7	Aeromonadales	nudF		3.6.1.13	ko:K01515	ko00230,map00230		R01054	RC00002	ko00000,ko00001,ko01000				Bacteria	1RCX7@1224,1RSM2@1236,1Y6B1@135624,COG0494@1,COG0494@2	NA|NA|NA	L	NUDIX domain	PANTHER, Gene3D, Pfam, PANTHER, SUPERFAMILY, CDD, ProSitePatterns, ProSiteProfiles	PTHR11839, G3DSA:3.90.79.10, PF00293, PTHR11839:SF1, SSF55811, cd03424, PS00893, PS51462	NUDIX domain, ADPRase_NUDT5, Nudix box signature., Nudix hydrolase domain profile.	IPR000086, IPR015797, IPR020084, IPR000086	NUDIX hydrolase domain, NUDIX hydrolase-like domain superfamily, NUDIX hydrolase, conserved site, NUDIX hydrolase domain	GO:0016787, GO:0016787, GO:0016787, GO:0016787
NZ_CP050969.1_194_9	399741.Spro_1732	8.8e-162	576.6	Serratia	pncB	GO:0000183,GO:0001302,GO:0003674,GO:0003824,GO:0004516,GO:0005575,GO:0005622,GO:0005623,GO:0005634,GO:0005737,GO:0005829,GO:0006139,GO:0006325,GO:0006342,GO:0006348,GO:0006355,GO:0006725,GO:0006732,GO:0006733,GO:0006734,GO:0006753,GO:0006793,GO:0006796,GO:0006807,GO:0006950,GO:0006996,GO:0007568,GO:0007569,GO:0008150,GO:0008152,GO:0009058,GO:0009108,GO:0009117,GO:0009165,GO:0009266,GO:0009408,GO:…	6.3.4.21	ko:K00763	ko00760,ko01100,map00760,map01100		R01724	RC00033	ko00000,ko00001,ko01000			iAF1260.b0931,iBWG_1329.BWG_0783,iECDH10B_1368.ECDH10B_1001,iECDH1ME8569_1439.ECDH1ME8569_0882,iECIAI39_1322.ECIAI39_2216,iETEC_1333.ETEC_0999,iEcDH1_1363.EcDH1_2712,iEcSMS35_1347.EcSMS35_2189,iJO1366.b0931,iJR904.b0931,iUMNK88_1353.UMNK88_1085,iY75_1357.Y75_RS04840	Bacteria	1MV8U@1224,1RQWS@1236,400IX@613,COG1488@1,COG1488@2	NA|NA|NA	F	Catalyzes the synthesis of beta-nicotinate D- ribonucleotide from nicotinate and 5-phospho-D-ribose 1-phosphate at the expense of ATP	CDD, TIGRFAM, SUPERFAMILY, PIRSF, Pfam, Gene3D, PANTHER, Hamap, PANTHER, SUPERFAMILY	cd01401, TIGR01514, SSF51690, PIRSF000484, PF04095, G3DSA:3.20.140.10, PTHR11098, MF_00570, PTHR11098:SF18, SSF54675	PncB_like, NAPRTase: nicotinate phosphoribosyltransferase, Nicotinate phosphoribosyltransferase (NAPRTase) family, Nicotinate phosphoribosyltransferase [pncB].	IPR006406, IPR006406, IPR036068, IPR007229, IPR007229, IPR007229, IPR006406	Nicotinate phosphoribosyltransferase, Nicotinate phosphoribosyltransferase, Nicotinate phosphoribosyltransferase-like, C-terminal, Nicotinate phosphoribosyltransferase family, Nicotinate phosphoribosyltransferase family, Nicotinate phosphoribosyltransferase family, Nicotinate phosphoribosyltransferase	GO:0004516, GO:0019357, GO:0004516, GO:0019357, GO:0004514, GO:0009435,GO:0004516, GO:0019357	KEGG: 00760+6.3.4.21|MetaCyc: PWY-5381, KEGG: 00760+6.3.4.21|MetaCyc: PWY-5381, KEGG: 00760+6.3.4.21|MetaCyc: PWY-5381, KEGG: 00760+6.3.4.21|MetaCyc: PWY-5381|Reactome: R-HSA-197264, KEGG: 00760+6.3.4.21|MetaCyc: PWY-5381|Reactome: R-HSA-197264, KEGG: 00760+6.3.4.21|MetaCyc: PWY-5381|Reactome: R-HSA-197264, KEGG: 00760+6.3.4.21|MetaCyc: PWY-5381
NZ_CP050969.1_195_1	598467.BrE312_2414	9.1e-18	96.7	Gammaproteobacteria													Bacteria	1NA8H@1224,1SA7Y@1236,2EDZZ@1,337UT@2	NA|NA|NA	S	Protein of unknown function (DUF2514)	Coils, Pfam	Coil, PF10721	Protein of unknown function (DUF2514)	IPR019659	Protein of unknown function DUF2514
NZ_CP050969.1_195_2	1448139.AI20_16330	3.2e-72	278.1	Aeromonadales	maa		2.3.1.79	ko:K00661					ko00000,ko01000				Bacteria	1N6SQ@1224,1SCHA@1236,1Y6ET@135624,COG0110@1,COG0110@2	NA|NA|NA	S	Maltose acetyltransferase	Pfam, SUPERFAMILY, ProSitePatterns, PANTHER, SMART, Pfam, PANTHER, CDD, Pfam, Gene3D	PF14602, SSF51161, PS00101, PTHR23416, SM01266, PF00132, PTHR23416:SF23, cd03357, PF12464, G3DSA:2.160.10.10	Hexapeptide repeat of succinyl-transferase, Hexapeptide-repeat containing-transferases signature., Bacterial transferase hexapeptide (six repeats), LbH_MAT_GAT, Maltose acetyltransferase	IPR001451, IPR011004, IPR018357, IPR024688, IPR001451, IPR024688	Hexapeptide repeat, Trimeric LpxA-like superfamily, Hexapeptide transferase, conserved site, Maltose/galactoside acetyltransferase, Hexapeptide repeat, Maltose/galactoside acetyltransferase	GO:0016740, GO:0016407, GO:0016407	Reactome: R-HSA-446205
NZ_CP050969.1_195_4	667121.ET1_07_00840	1.6e-51	208.8	Gammaproteobacteria				ko:K07741					ko00000				Bacteria	1N1AT@1224,1RRY7@1236,COG3561@1,COG3561@2	NA|NA|NA	K	Antirepressor	NA	NA	NA	NA	NA	NA	NA
NZ_CP050969.1_196_1	61647.LG71_03430	5.4e-12	76.6	Gammaproteobacteria				ko:K07741					ko00000				Bacteria	1N1AT@1224,1RRY7@1236,COG3561@1,COG3561@2	NA|NA|NA	K	Antirepressor	Pfam	PF08346	AntA/AntB antirepressor	IPR013557	AntA/AntB antirepressor
NZ_CP050969.1_196_2	945083.W0LI70_9CAUD	2.5e-52	211.5	Siphoviridae													Viruses	4QHC8@10239,4QKZT@10699,4QSRC@28883,4QZ9A@35237	NA|NA|NA	S	D-alanyl-D-alanine carboxypeptidase	Gene3D, Pfam, SUPERFAMILY	G3DSA:3.30.1380.10, PF13539, SSF55166	D-alanyl-D-alanine carboxypeptidase	IPR009045, IPR039561, IPR009045	Hedgehog signalling/DD-peptidase zinc-binding domain superfamily, Peptidase M15C, Hedgehog signalling/DD-peptidase zinc-binding domain superfamily	GO:0008233	Reactome: R-HSA-373080|Reactome: R-HSA-5358346|Reactome: R-HSA-5362798|Reactome: R-HSA-5632681|Reactome: R-HSA-5632684|Reactome: R-HSA-5635838|Reactome: R-HSA-5658034, Reactome: R-HSA-373080|Reactome: R-HSA-5358346|Reactome: R-HSA-5362798|Reactome: R-HSA-5632681|Reactome: R-HSA-5632684|Reactome: R-HSA-5635838|Reactome: R-HSA-5658034
NZ_CP050969.1_2_1	1219065.VPR01S_05_02550	1.7e-20	104.4	Vibrionales	yoeB			ko:K19158					ko00000,ko01000,ko02048				Bacteria	1MZBP@1224,1S99Z@1236,1XY05@135623,COG4115@1,COG4115@2	NA|NA|NA	S	YoeB-like toxin of bacterial type II toxin-antitoxin system	SUPERFAMILY, PANTHER, TIGRFAM, Pfam, Gene3D	SSF143011, PTHR38039, TIGR02116, PF06769, G3DSA:3.30.2310.20	toxin_Txe_YoeB: addiction module toxin, Txe/YoeB family, YoeB-like toxin of bacterial type II toxin-antitoxin system	IPR035093, IPR009614, IPR009614, IPR009614, IPR035093	Toxin-antitoxin system, RelE/ParE toxin domain superfamily, Toxin YoeB, Toxin YoeB, Toxin YoeB, Toxin-antitoxin system, RelE/ParE toxin domain superfamily	GO:0004519, GO:0006401, GO:0004519, GO:0006401, GO:0004519, GO:0006401
NZ_CP050969.1_203_1	1127673.GLIP_3823	2.8e-11	73.6	Alteromonadaceae				ko:K07483					ko00000				Bacteria	1MZ5C@1224,1S9KN@1236,46DK3@72275,COG2963@1,COG2963@2	NA|NA|NA	L	Transposase	Coils, PANTHER, SUPERFAMILY, PANTHER	Coil, PTHR33215:SF5, SSF46689, PTHR33215		IPR009057	Homeobox-like domain superfamily	GO:0003677
NZ_CP050969.1_204_1	1123236.KB899393_gene3246	7.9e-98	363.2	Alteromonadaceae	insF			ko:K07497					ko00000				Bacteria	1MVXQ@1224,1RR4F@1236,4686H@72275,COG2801@1,COG2801@2	NA|NA|NA	L	COG2801 Transposase and inactivated derivatives	Pfam, ProSiteProfiles, SUPERFAMILY, PANTHER, Gene3D	PF00665, PS50994, SSF53098, PTHR42648, G3DSA:3.30.420.10	Integrase core domain, Integrase catalytic domain profile.	IPR001584, IPR001584, IPR012337, IPR038965, IPR036397	Integrase, catalytic core, Integrase, catalytic core, Ribonuclease H-like superfamily, Transposase InsF-like, Ribonuclease H superfamily	GO:0015074, GO:0015074, GO:0032196, GO:0003676
NZ_CP050969.1_204_10	667121.ET1_09_00530	6.6e-77	293.5	Gammaproteobacteria	yodB	GO:0005575,GO:0005623,GO:0005886,GO:0016020,GO:0044464,GO:0071944		ko:K12262					ko00000				Bacteria	1RBP8@1224,1S563@1236,COG3038@1,COG3038@2	NA|NA|NA	C	Cytochrome B561	PANTHER, Coils, Pfam, PANTHER, SUPERFAMILY	PTHR30529:SF3, Coil, PF01292, PTHR30529, SSF81342	Prokaryotic cytochrome b561	IPR011577, IPR016174	Cytochrome b561, bacterial/Ni-hydrogenase, Di-haem cytochrome, transmembrane	GO:0009055, GO:0016021, GO:0016020, GO:0022904	Reactome: R-HSA-611105
NZ_CP050969.1_204_11	29486.NJ56_08345	2.9e-43	181	Yersinia	yciH	GO:0001731,GO:0002181,GO:0002183,GO:0002188,GO:0002190,GO:0002192,GO:0003674,GO:0003676,GO:0003723,GO:0003729,GO:0003743,GO:0005488,GO:0005575,GO:0005622,GO:0005623,GO:0005737,GO:0006412,GO:0006413,GO:0006518,GO:0006807,GO:0008135,GO:0008150,GO:0008152,GO:0009058,GO:0009059,GO:0009987,GO:0010467,GO:0016043,GO:0019538,GO:0022607,GO:0022613,GO:0022618,GO:0032991,GO:0034622,GO:0034641,GO:0034645,GO:…		ko:K03113	ko03013,map03013				ko00000,ko00001,ko03012				Bacteria	1MZ8T@1224,1S929@1236,41GAA@629,COG0023@1,COG0023@2	NA|NA|NA	J	translation initiation	Gene3D, CDD, PANTHER, ProSiteProfiles, TIGRFAM, PIRSF, SUPERFAMILY, Pfam	G3DSA:3.30.780.10, cd11567, PTHR12789, PS50296, TIGR01158, PIRSF037511, SSF55159, PF01253	YciH_like, Translation initiation factor SUI1 family profile., SUI1_rel: putative translation initiation factor SUI1, Translation initiation factor SUI1	IPR005872, IPR005872, IPR001950, IPR005872, IPR005872, IPR036877, IPR001950	Archaeal/bacterial translation initiation factor SUI1, Archaeal/bacterial translation initiation factor SUI1, SUI1 domain, Archaeal/bacterial translation initiation factor SUI1, Archaeal/bacterial translation initiation factor SUI1, SUI1 domain superfamily, SUI1 domain	GO:0003743, GO:0003743, GO:0003743, GO:0006413, GO:0003743, GO:0003743, GO:0003743, GO:0006413, GO:0003743, GO:0006413
NZ_CP050969.1_204_12	55207.KP22_06230	1.3e-99	369.4	Pectobacterium	pyrF	GO:0003674,GO:0003824,GO:0004590,GO:0005488,GO:0005515,GO:0005575,GO:0005622,GO:0005623,GO:0005737,GO:0005829,GO:0006139,GO:0006206,GO:0006207,GO:0006220,GO:0006221,GO:0006725,GO:0006753,GO:0006793,GO:0006796,GO:0006807,GO:0008150,GO:0008152,GO:0009058,GO:0009112,GO:0009117,GO:0009165,GO:0009218,GO:0009220,GO:0009259,GO:0009260,GO:0009987,GO:0016829,GO:0016830,GO:0016831,GO:0018130,GO:0019438,GO:…	4.1.1.23	ko:K01591	ko00240,ko01100,map00240,map01100	M00051	R00965	RC00409	ko00000,ko00001,ko00002,ko01000				Bacteria	1MR65@122277,1MW2C@1224,1RNJR@1236,COG0284@1,COG0284@2	NA|NA|NA	F	Catalyzes the decarboxylation of orotidine 5- monophosphate (OMP) to uridine 5-monophosphate (UMP)	PANTHER, PANTHER, Gene3D, SMART, SUPERFAMILY, Pfam, ProSitePatterns, TIGRFAM, Hamap, CDD	PTHR32119, PTHR32119:SF2, G3DSA:3.20.20.70, SM00934, SSF51366, PF00215, PS00156, TIGR01740, MF_01200_B, cd04725	[\Orotidine 5-phosphate decarboxylase / HUMPS family\", \"Orotidine 5-phosphate decarboxylase active site.\", \"pyrF: orotidine 5-phosphate decarboxylase\", \"Orotidine 5-phosphate decarboxylase [pyrF].\", OMP_decarboxylase_like"	IPR014732, IPR013785, IPR001754, IPR011060, IPR001754, IPR018089, IPR014732, IPR014732	[ \Orotidine 5-phosphate decarboxylase\", Aldolase-type TIM barrel, \"Orotidine 5-phosphate decarboxylase domain\", Ribulose-phosphate binding barrel, \"Orotidine 5-phosphate decarboxylase domain\", \"Orotidine 5-phosphate decarboxylase, active site\", \"Orotidine 5-phosphate decarboxylase\", \"Orotidine 5-phosphate decarboxylase\"]"	GO:0004590, GO:0044205, GO:0003824, GO:0004590, GO:0006207, GO:0003824, GO:0004590, GO:0006207, GO:0004590, GO:0006207, GO:0004590, GO:0044205, GO:0004590, GO:0044205	KEGG: 00240+4.1.1.23|MetaCyc: PWY-5686|MetaCyc: PWY-7790|MetaCyc: PWY-7791|Reactome: R-HSA-500753, KEGG: 00240+4.1.1.23|MetaCyc: PWY-5686|MetaCyc: PWY-7790|MetaCyc: PWY-7791|Reactome: R-HSA-500753, KEGG: 00240+4.1.1.23|MetaCyc: PWY-5686|MetaCyc: PWY-7790|MetaCyc: PWY-7791|Reactome: R-HSA-500753, KEGG: 00240+4.1.1.23|MetaCyc: PWY-5686|MetaCyc: PWY-7790|MetaCyc: PWY-7791|Reactome: R-HSA-500753, KEG…
NZ_CP050969.1_204_13	1453496.AT03_12895	6.8e-167	593.6	Gammaproteobacteria	lapB	GO:0003674,GO:0005488,GO:0005575,GO:0005622,GO:0005623,GO:0005737,GO:0005829,GO:0005886,GO:0005887,GO:0005975,GO:0005976,GO:0006629,GO:0008150,GO:0008152,GO:0008653,GO:0009987,GO:0016020,GO:0016021,GO:0031224,GO:0031226,GO:0043167,GO:0043169,GO:0043170,GO:0044237,GO:0044238,GO:0044255,GO:0044260,GO:0044262,GO:0044264,GO:0044424,GO:0044425,GO:0044444,GO:0044459,GO:0044464,GO:0046872,GO:0071704,GO:…		ko:K19804					ko00000				Bacteria	1MVDP@1224,1RP29@1236,COG2956@1,COG2956@2	NA|NA|NA	G	Modulates cellular lipopolysaccharide (LPS) levels by regulating LpxC, which is involved in lipid A biosynthesis. May act by modulating the proteolytic activity of FtsH towards LpxC. May also coordinate assembly of proteins involved in LPS synthesis at the plasma membrane	ProSiteProfiles, SUPERFAMILY, Gene3D, PANTHER, Hamap, Pfam, Gene3D	PS50293, SSF48452, G3DSA:1.25.40.10, PTHR45586, MF_00994, PF14559, G3DSA:1.25.40.10	TPR repeat region circular profile., Lipopolysaccharide assembly protein B [lapB]., Tetratricopeptide repeat	IPR013026, IPR011990, IPR011990, IPR030865, IPR011990	Tetratricopeptide repeat-containing domain, Tetratricopeptide-like helical domain superfamily, Tetratricopeptide-like helical domain superfamily, Lipopolysaccharide assembly protein B, Tetratricopeptide-like helical domain superfamily	GO:0005515, GO:0005515, GO:0005515, GO:0008653, GO:0005515
NZ_CP050969.1_204_14	1484158.PSNIH1_14010	1.5e-25	122.1	Pantoea	lapA	GO:0005575,GO:0005623,GO:0005886,GO:0005887,GO:0005975,GO:0005976,GO:0006629,GO:0008150,GO:0008152,GO:0008653,GO:0009987,GO:0016020,GO:0016021,GO:0031224,GO:0031226,GO:0043170,GO:0044237,GO:0044238,GO:0044255,GO:0044260,GO:0044262,GO:0044264,GO:0044425,GO:0044459,GO:0044464,GO:0071704,GO:0071944,GO:1901135,GO:1903509		ko:K08992					ko00000				Bacteria	1MZGX@1224,1S9X9@1236,3W12T@53335,COG3771@1,COG3771@2	NA|NA|NA	S	involved in the assembly of lipopolysaccharide (LPS)	Hamap, MobiDBLite, Coils, Pfam, MobiDBLite	MF_01948, mobidb-lite, Coil, PF06305, mobidb-lite	Lipopolysaccharide assembly protein A [lapA]., consensus disorder prediction, Lipopolysaccharide assembly protein A domain, consensus disorder prediction	IPR032906, IPR010445	Lipopolysaccharide assembly protein A, Lipopolysaccharide assembly protein A domain	GO:0005886, GO:0008653, GO:0005887
NZ_CP050969.1_204_15	1141663.OOC_08203	3.1e-41	174.1	Providencia	himD	GO:0003674,GO:0003676,GO:0003677,GO:0005488,GO:0005575,GO:0005622,GO:0005623,GO:0005737,GO:0005829,GO:0006139,GO:0006351,GO:0006725,GO:0006807,GO:0008150,GO:0008152,GO:0009058,GO:0009059,GO:0009889,GO:0009987,GO:0010467,GO:0010556,GO:0016070,GO:0018130,GO:0019219,GO:0019222,GO:0019438,GO:0031323,GO:0031326,GO:0032774,GO:0034641,GO:0034645,GO:0034654,GO:0043170,GO:0044237,GO:0044238,GO:0044249,GO:…		ko:K05788					ko00000,ko03032,ko03036,ko03400				Bacteria	1MZ7M@1224,1S8XZ@1236,3Z98Q@586,COG0776@1,COG0776@2	NA|NA|NA	K	This protein is one of the two subunits of integration host factor, a specific DNA-binding protein that functions in genetic recombination as well as in transcriptional and translational control	PRINTS, PRINTS, PRINTS, TIGRFAM, PANTHER, Pfam, PANTHER, Hamap, SUPERFAMILY, SMART, ProSitePatterns, CDD, Gene3D, Gene3D	PR01727, PR01727, PR01727, TIGR00988, PTHR33175, PF00216, PTHR33175:SF5, MF_00381, SSF47729, SM00411, PS00045, cd13836, G3DSA:4.10.520.10, G3DSA:4.10.520.10	Prokaryotic integration host factor signature, Prokaryotic integration host factor signature, Prokaryotic integration host factor signature, hip: integration host factor, beta subunit, Bacterial DNA-binding protein, Integration host factor subunit beta [ihfB]., Bacterial histone-like DNA-binding proteins signature., IHF_B	IPR000119, IPR000119, IPR000119, IPR005685, IPR000119, IPR000119, IPR005685, IPR010992, IPR000119, IPR020816, IPR010992, IPR010992	Histone-like DNA-binding protein, Histone-like DNA-binding protein, Histone-like DNA-binding protein, Integration host factor, beta subunit, Histone-like DNA-binding protein, Histone-like DNA-binding protein, Integration host factor, beta subunit, Integration host factor (IHF)-like DNA-binding domain superfamily, Histone-like DNA-binding protein, Histone-like DNA-binding protein, conserved site, …	GO:0003677, GO:0003677, GO:0003677, GO:0003677, GO:0005694, GO:0006310, GO:0006355, GO:0003677, GO:0003677, GO:0003677, GO:0005694, GO:0006310, GO:0006355, GO:0003677, GO:0003677, GO:0003677, GO:0003677, GO:0003677
NZ_CP050969.1_204_16	667121.ET1_21_00710	5.1e-293	1013.1	Gammaproteobacteria	rpsA	GO:0000028,GO:0003674,GO:0003676,GO:0003723,GO:0003729,GO:0003735,GO:0005198,GO:0005488,GO:0005575,GO:0005622,GO:0005623,GO:0005737,GO:0005829,GO:0005840,GO:0006412,GO:0006417,GO:0006518,GO:0006807,GO:0006996,GO:0008150,GO:0008152,GO:0009058,GO:0009059,GO:0009889,GO:0009890,GO:0009892,GO:0009987,GO:0010467,GO:0010468,GO:0010556,GO:0010558,GO:0010605,GO:0010608,GO:0010629,GO:0015935,GO:0016043,GO:…	1.17.7.4	ko:K02945,ko:K03527	ko00900,ko01100,ko01110,ko01130,ko03010,map00900,map01100,map01110,map01130,map03010	M00096,M00178	R05884,R08210	RC01137,RC01487	br01610,ko00000,ko00001,ko00002,ko01000,ko03011				Bacteria	1MVAV@1224,1RMFY@1236,COG0539@1,COG0539@2	NA|NA|NA	J	thus facilitating recognition of the initiation point. It is needed to translate mRNA with a short Shine-Dalgarno (SD) purine-rich sequence	SUPERFAMILY, CDD, ProSiteProfiles, SUPERFAMILY, SUPERFAMILY, Gene3D, SUPERFAMILY, Gene3D, SUPERFAMILY, TIGRFAM, ProSiteProfiles, ProSiteProfiles, PANTHER, ProSiteProfiles, CDD, SUPERFAMILY, ProSiteProfiles, PRINTS, PRINTS, PRINTS, PRINTS, PRINTS, PRINTS, PRINTS, PRINTS, PRINTS, PANTHER, PANTHER, Pfam, Pfam, Pfam, Pfam, Pfam, Pfam, Gene3D, ProSiteProfiles, CDD, PIRSF, CDD, PANTHER, CDD, CDD, Gene3…	SSF50249, cd05687, PS50126, SSF50249, SSF50249, G3DSA:2.40.50.140, SSF50249, G3DSA:2.40.50.140, SSF50249, TIGR00717, PS50126, PS50126, PTHR10724, PS50126, cd05688, SSF50249, PS50126, PR00681, PR00681, PR00681, PR00681, PR00681, PR00681, PR00681, PR00681, PR00681, PTHR10724, PTHR10724:SF7, PF00575, PF00575, PF00575, PF00575, PF00575, PF00575, G3DSA:2.40.50.140, PS50126, cd05689, PIRSF002111, cd044…	S1_RPS1_repeat_ec1_hs1, S1 domain profile., rpsA: ribosomal protein bS1, S1 domain profile., S1 domain profile., S1 domain profile., S1_RPS1_repeat_ec3, S1 domain profile., Ribosomal protein S1 signature, Ribosomal protein S1 signature, Ribosomal protein S1 signature, Ribosomal protein S1 signature, Ribosomal protein S1 signature, Ribosomal protein S1 signature, Ribosomal protein S1 signature, Ri…	IPR012340, IPR003029, IPR012340, IPR012340, IPR012340, IPR012340, IPR000110, IPR003029, IPR003029, IPR003029, IPR012340, IPR003029, IPR003029, IPR003029, IPR003029, IPR003029, IPR003029, IPR003029, IPR003029, IPR000110, IPR022967, IPR022967, IPR022967, IPR022967, IPR022967, IPR022967	Nucleic acid-binding, OB-fold, S1 domain, Nucleic acid-binding, OB-fold, Nucleic acid-binding, OB-fold, Nucleic acid-binding, OB-fold, Nucleic acid-binding, OB-fold, Ribosomal protein S1, S1 domain, S1 domain, S1 domain, Nucleic acid-binding, OB-fold, S1 domain, S1 domain, S1 domain, S1 domain, S1 domain, S1 domain, S1 domain, S1 domain, Ribosomal protein S1, RNA-binding domain, S1, RNA-binding d…	GO:0003676, GO:0003723, GO:0003735, GO:0005840, GO:0006412, GO:0003676, GO:0003676, GO:0003676, GO:0003676, GO:0003676, GO:0003676, GO:0003676, GO:0003676, GO:0003676, GO:0003676, GO:0003676, GO:0003723, GO:0003735, GO:0005840, GO:0006412
NZ_CP050969.1_204_17	1216966.BAUC01000004_gene2016	1.5e-94	352.4	Gammaproteobacteria	cmk	GO:0003674,GO:0003824,GO:0004127,GO:0004592,GO:0005575,GO:0005622,GO:0005623,GO:0005737,GO:0005829,GO:0006082,GO:0006139,GO:0006520,GO:0006573,GO:0006575,GO:0006725,GO:0006732,GO:0006753,GO:0006766,GO:0006767,GO:0006793,GO:0006796,GO:0006807,GO:0008150,GO:0008152,GO:0009058,GO:0009081,GO:0009108,GO:0009110,GO:0009117,GO:0009123,GO:0009165,GO:0009314,GO:0009628,GO:0009987,GO:0010165,GO:0010212,GO:…	1.17.7.4,2.5.1.19,2.7.1.26,2.7.4.25,2.7.7.2,6.3.2.1	ko:K00800,ko:K00945,ko:K02945,ko:K03527,ko:K03977,ko:K11753,ko:K13799	ko00240,ko00400,ko00410,ko00740,ko00770,ko00900,ko01100,ko01110,ko01130,ko01230,ko03010,map00240,map00400,map00410,map00740,map00770,map00900,map01100,map01110,map01130,map01230,map03010	M00022,M00052,M00096,M00119,M00125,M00178	R00158,R00161,R00512,R00549,R01665,R02473,R03460,R05884,R08210	RC00002,RC00017,RC00096,RC00141,RC00350,RC01137,RC01487	br01610,ko00000,ko00001,ko00002,ko01000,ko03009,ko03011			iPC815.YPO1391,iSDY_1059.SDY_2348	Bacteria	1MUUD@1224,1RNKT@1236,COG0283@1,COG0283@2	NA|NA|NA	F	Belongs to the cytidylate kinase family. Type 1 subfamily	Gene3D, Hamap, TIGRFAM, Pfam, PANTHER, CDD, PANTHER, SUPERFAMILY	G3DSA:3.40.50.300, MF_00238, TIGR00017, PF02224, PTHR21299, cd02020, PTHR21299:SF2, SSF52540	Cytidylate kinase [cmk]., cmk: cytidylate kinase, Cytidylate kinase, CMPK	IPR003136, IPR003136, IPR011994, IPR027417	Cytidylate kinase, Cytidylate kinase, Cytidylate kinase domain, P-loop containing nucleoside triphosphate hydrolase	GO:0004127, GO:0005524, GO:0006139, GO:0004127, GO:0005524, GO:0006139, GO:0004127, GO:0005524, GO:0006139, nan]	KEGG: 00240+2.7.4.25|MetaCyc: PWY-7205, KEGG: 00240+2.7.4.25|MetaCyc: PWY-7205, KEGG: 00240+2.7.4.25|MetaCyc: PWY-7205, nan]
NZ_CP050969.1_204_18	273526.SMDB11_0990	6.5e-187	660.2	Serratia	aroA	GO:0003674,GO:0003824,GO:0003866,GO:0005575,GO:0005622,GO:0005623,GO:0005737,GO:0005829,GO:0006082,GO:0008150,GO:0008152,GO:0009058,GO:0009423,GO:0009987,GO:0016053,GO:0016740,GO:0016765,GO:0019752,GO:0043436,GO:0043648,GO:0043650,GO:0044237,GO:0044249,GO:0044281,GO:0044283,GO:0044424,GO:0044444,GO:0044464,GO:0046394,GO:0046417,GO:0071704,GO:1901576	2.5.1.19	ko:K00800	ko00400,ko01100,ko01110,ko01130,ko01230,map00400,map01100,map01110,map01130,map01230	M00022	R03460	RC00350	ko00000,ko00001,ko00002,ko01000			iEC042_1314.EC042_0998,iECNA114_1301.ECNA114_0940,iECSF_1327.ECSF_0829,iPC815.YPO1390	Bacteria	1MWMK@1224,1RQ8U@1236,4028V@613,COG0128@1,COG0128@2	NA|NA|NA	E	Catalyzes the transfer of the enolpyruvyl moiety of phosphoenolpyruvate (PEP) to the 5-hydroxyl of shikimate-3- phosphate (S3P) to produce enolpyruvyl shikimate-3-phosphate and inorganic phosphate	Gene3D, Pfam, Hamap, PANTHER, SUPERFAMILY, Gene3D, PIRSF, CDD, PANTHER, ProSitePatterns, TIGRFAM, ProSitePatterns	G3DSA:3.65.10.10, PF00275, MF_00210, PTHR21090, SSF55205, G3DSA:3.65.10.10, PIRSF000505, cd01556, PTHR21090:SF23, PS00104, TIGR01356, PS00885	EPSP synthase (3-phosphoshikimate 1-carboxyvinyltransferase), 3-phosphoshikimate 1-carboxyvinyltransferase [aroA].,EPSP_synthase, EPSP synthase signature 1., aroA: 3-phosphoshikimate 1-carboxyvinyltransferase, EPSP synthase signature 2.	IPR036968, IPR001986, IPR006264, IPR013792, IPR036968, IPR006264, IPR006264, IPR023193, IPR006264, IPR023193	Enolpyruvate transferase domain superfamily, Enolpyruvate transferase domain, 3-phosphoshikimate 1-carboxyvinyltransferase, \RNA 3-terminal phosphate cyclase/enolpyruvate transferase, alpha/beta\", Enolpyruvate transferase domain superfamily, 3-phosphoshikimate 1-carboxyvinyltransferase, 3-phosphoshikimate 1-carboxyvinyltransferase, 3-phosphoshikimate 1-carboxyvinyltransferase, conserved site, 3-…	GO:0016765, GO:0016765, GO:0003866, GO:0009073, GO:0003824, GO:0016765, GO:0003866, GO:0009073, GO:0003866, GO:0009073, GO:0003866, GO:0009073	KEGG: 00400+2.5.1.19|MetaCyc: PWY-6163, KEGG: 00400+2.5.1.19|MetaCyc: PWY-6163, KEGG: 00400+2.5.1.19|MetaCyc: PWY-6163, KEGG: 00400+2.5.1.19|MetaCyc: PWY-6163, KEGG: 00400+2.5.1.19|MetaCyc: PWY-6163, KEGG: 00400+2.5.1.19|MetaCyc: PWY-6163
NZ_CP050969.1_204_19	1214065.BAGV01000019_gene2658	1.5e-147	529.3	Gammaproteobacteria	hisC		2.6.1.9	ko:K00817	ko00340,ko00350,ko00360,ko00400,ko00401,ko00960,ko01100,ko01110,ko01130,ko01230,map00340,map00350,map00360,map00400,map00401,map00960,map01100,map01110,map01130,map01230	M00026	R00694,R00734,R03243	RC00006,RC00888	ko00000,ko00001,ko00002,ko01000,ko01007				Bacteria	1MW7I@1224,1RP4T@1236,COG0079@1,COG0079@2	NA|NA|NA	E	Belongs to the class-II pyridoxal-phosphate-dependent aminotransferase family. Histidinol-phosphate aminotransferase subfamily	Gene3D, Hamap, PANTHER, ProSitePatterns, Pfam, SUPERFAMILY, PANTHER, Gene3D, CDD, TIGRFAM	G3DSA:3.90.1150.10, MF_01023, PTHR43643, PS00599, PF00155, SSF53383, PTHR43643:SF3, G3DSA:3.40.640.10, cd00609, TIGR01141	Histidinol-phosphate aminotransferase [hisC]., Aminotransferases class-II pyridoxal-phosphate attachment site., Aminotransferase class I and II, AAT_like, hisC: histidinol-phosphate transaminase	IPR015422, IPR005861, IPR001917, IPR004839, IPR015424, IPR015421, IPR005861	Pyridoxal phosphate-dependent transferase domain 1, Histidinol-phosphate aminotransferase family, Aminotransferase, class-II, pyridoxal-phosphate binding site, Aminotransferase, class I/classII, Pyridoxal phosphate-dependent transferase, Pyridoxal phosphate-dependent transferase, major domain, Histidinol-phosphate aminotransferase family	GO:0003824, GO:0000105, GO:0004400, GO:0016740, GO:0009058, GO:0030170, GO:0003824, GO:0000105, GO:0004400	KEGG: 00340+2.6.1.9|KEGG: 00350+2.6.1.9|KEGG: 00360+2.6.1.9|KEGG: 00400+2.6.1.9|KEGG: 00401+2.6.1.9|KEGG: 00960+2.6.1.9, KEGG: 00340+2.6.1.9|KEGG: 00350+2.6.1.9|KEGG: 00360+2.6.1.9|KEGG: 00400+2.6.1.9|KEGG: 00401+2.6.1.9|KEGG: 00960+2.6.1.9
NZ_CP050969.1_204_20	82995.CR62_03350	1.9e-187	662.1	Serratia	gnd	GO:0003674,GO:0003824,GO:0004616,GO:0005488,GO:0005515,GO:0005575,GO:0005622,GO:0005623,GO:0005737,GO:0005829,GO:0005975,GO:0006081,GO:0006082,GO:0006098,GO:0006139,GO:0006725,GO:0006732,GO:0006733,GO:0006739,GO:0006753,GO:0006793,GO:0006796,GO:0006807,GO:0008150,GO:0008152,GO:0009056,GO:0009117,GO:0009987,GO:0016052,GO:0016054,GO:0016491,GO:0016614,GO:0016616,GO:0019362,GO:0019520,GO:0019521,GO:…	1.1.1.343,1.1.1.44	ko:K00033	ko00030,ko00480,ko01100,ko01110,ko01120,ko01130,ko01200,map00030,map00480,map01100,map01110,map01120,map01130,map01200	M00004,M00006	R01528,R10221	RC00001,RC00539	ko00000,ko00001,ko00002,ko01000			iECS88_1305.ECS88_2128,iECW_1372.ECW_m2189,iEKO11_1354.EKO11_1765,iPC815.YPO1541,iWFL_1372.ECW_m2189	Bacteria	1MVV8@1224,1RM7P@1236,401KQ@613,COG0362@1,COG0362@2	NA|NA|NA	G	Catalyzes the oxidative decarboxylation of 6- phosphogluconate to ribulose 5-phosphate and CO(2), with concomitant reduction of NADP to NADPH	SUPERFAMILY, PRINTS, PRINTS, PRINTS, PRINTS, PRINTS, PRINTS, Gene3D, Gene3D, Gene3D, PANTHER, PANTHER, PIRSF, Pfam, Pfam, ProSitePatterns, SMART, TIGRFAM, SUPERFAMILY	SSF51735, PR00076, PR00076, PR00076, PR00076, PR00076, PR00076, G3DSA:3.40.50.720, G3DSA:1.10.1040.10, G3DSA:1.20.5.320, PTHR11811, PTHR11811:SF25, PIRSF000109, PF00393, PF03446, PS00461, SM01350, TIGR00873, SSF48179	6-phosphogluconate dehydrogenase signature, 6-phosphogluconate dehydrogenase signature, 6-phosphogluconate dehydrogenase signature, 6-phosphogluconate dehydrogenase signature, 6-phosphogluconate dehydrogenase signature, 6-phosphogluconate dehydrogenase signature, 6-phosphogluconate dehydrogenase, C-terminal domain, NAD binding domain of 6-phosphogluconate dehydrogenase, 6-phosphogluconate dehydro…	IPR036291, IPR006183, IPR006183, IPR006183, IPR006183, IPR006183, IPR006183, IPR013328, IPR006183, IPR006113, IPR006114, IPR006115, IPR006184, IPR006114, IPR006113, IPR008927	NAD(P)-binding domain superfamily, 6-phosphogluconate dehydrogenase, 6-phosphogluconate dehydrogenase, 6-phosphogluconate dehydrogenase, 6-phosphogluconate dehydrogenase, 6-phosphogluconate dehydrogenase, 6-phosphogluconate dehydrogenase, 6-phosphogluconate dehydrogenase, domain 2, 6-phosphogluconate dehydrogenase, 6-phosphogluconate dehydrogenase, decarboxylating, 6-phosphogluconate dehydrogenas…	GO:0004616, GO:0055114, GO:0004616, GO:0055114, GO:0004616, GO:0055114, GO:0004616, GO:0055114, GO:0004616, GO:0055114, GO:0004616, GO:0055114, GO:0016491, GO:0055114, GO:0004616, GO:0055114, GO:0004616, GO:0006098, GO:0055114, GO:0004616, GO:0006098, GO:0055114, GO:0050661, GO:0004616, GO:0006098, GO:0055114, GO:0004616, GO:0006098, GO:0055114, GO:0004616, GO:0006098, GO:0055114, GO:0055114	KEGG: 00030+1.1.1.44|KEGG: 00480+1.1.1.44|Reactome: R-HSA-71336, KEGG: 00030+1.1.1.44|KEGG: 00480+1.1.1.44|Reactome: R-HSA-71336, KEGG: 00030+1.1.1.44|KEGG: 00480+1.1.1.44|Reactome: R-HSA-71336, KEGG: 00030+1.1.1.44|KEGG: 00480+1.1.1.44|Reactome: R-HSA-71336, KEGG: 00030+1.1.1.44|KEGG: 00480+1.1.1.44|Reactome: R-HSA-71336, KEGG: 00030+1.1.1.44|KEGG: 00480+1.1.1.44|Reactome: R-HSA-71336, KEGG: 000…
NZ_CP050969.1_204_21	1214065.BAGV01000019_gene2659	1.7e-164	585.5	unclassified Enterobacteriaceae	serC	GO:0003674,GO:0003824,GO:0004648,GO:0005488,GO:0005575,GO:0005622,GO:0005623,GO:0005737,GO:0005829,GO:0006081,GO:0006082,GO:0006520,GO:0006553,GO:0006563,GO:0006564,GO:0006725,GO:0006732,GO:0006766,GO:0006767,GO:0006793,GO:0006796,GO:0006807,GO:0008144,GO:0008150,GO:0008152,GO:0008483,GO:0008652,GO:0009058,GO:0009066,GO:0009067,GO:0009069,GO:0009070,GO:0009085,GO:0009089,GO:0009108,GO:0009110,GO:…	2.6.1.52	ko:K00831	ko00260,ko00680,ko00750,ko01100,ko01120,ko01130,ko01200,ko01230,map00260,map00680,map00750,map01100,map01120,map01130,map01200,map01230	M00020,M00124	R04173,R05085	RC00006,RC00036	ko00000,ko00001,ko00002,ko01000,ko01007			iEcE24377_1341.EcE24377A_1004,iPC815.YPO1389,iYL1228.KPN_00935	Bacteria	1MUB5@1224,1RMKU@1236,282KQ@191675,COG1932@1,COG1932@2	NA|NA|NA	H	Catalyzes the reversible conversion of 3- phosphohydroxypyruvate to phosphoserine and of 3-hydroxy-2-oxo-4- phosphonooxybutanoate to phosphohydroxythreonine	ProSitePatterns, Gene3D, CDD, Hamap, TIGRFAM, Gene3D, PANTHER, SUPERFAMILY, Pfam, PIRSF, PANTHER	PS00595, G3DSA:3.90.1150.10, cd00611, MF_00160, TIGR01364, G3DSA:3.40.640.10, PTHR43247:SF2, SSF53383, PF00266, PIRSF000525, PTHR43247	Aminotransferases class-V pyridoxal-phosphate attachment site., PSAT_like, Phosphoserine aminotransferase [serC]., serC_1: phosphoserine transaminase, Aminotransferase class-V	IPR020578, IPR015422, IPR022278, IPR022278, IPR022278, IPR015421, IPR015424, IPR000192, IPR022278	Aminotransferase class-V, pyridoxal-phosphate binding site, Pyridoxal phosphate-dependent transferase domain 1, Phosphoserine aminotransferase, Phosphoserine aminotransferase, Phosphoserine aminotransferase, Pyridoxal phosphate-dependent transferase, major domain, Pyridoxal phosphate-dependent transferase, Aminotransferase class V domain, Phosphoserine aminotransferase	GO:0003824, GO:0004648, GO:0006564, GO:0004648, GO:0006564, GO:0004648, GO:0006564, GO:0003824, GO:0004648, GO:0006564	KEGG: 00260+2.6.1.52|KEGG: 00680+2.6.1.52|KEGG: 00750+2.6.1.52|Reactome: R-HSA-977347, KEGG: 00260+2.6.1.52|KEGG: 00680+2.6.1.52|KEGG: 00750+2.6.1.52|Reactome: R-HSA-977347, KEGG: 00260+2.6.1.52|KEGG: 00680+2.6.1.52|KEGG: 00750+2.6.1.52|Reactome: R-HSA-977347,KEGG: 00260+2.6.1.52|KEGG: 00680+2.6.1.52|KEGG: 00750+2.6.1.52|Reactome: R-HSA-977347
NZ_CP050969.1_204_22	557598.LHK_00745	5.6e-15	87.4	Proteobacteria	hdeA	GO:0003674,GO:0005488,GO:0005515,GO:0008150,GO:0009268,GO:0009628,GO:0009987,GO:0010447,GO:0042802,GO:0050896,GO:0051087,GO:0051716,GO:0071214,GO:0071467,GO:0071468,GO:0104004		ko:K19777					ko00000,ko03110				Bacteria	1NBBC@1224,2E34D@1,32Y4G@2	NA|NA|NA	M	Required for optimal acid stress protection. Exhibits a chaperone-like activity only at low pH by suppressing non- specifically the aggregation of denaturated periplasmic proteins	SUPERFAMILY, Pfam, ProDom, Gene3D	SSF47752, PF06411, PD065392, G3DSA:1.10.890.10	HdeA/HdeB family, HDEA PRECURSOR SIGNAL PERIPLASMIC 3D-STRUCTURE DIRECT 10K-S SEQUENCING	IPR036831, IPR010486, IPR024972, IPR038303	HNS-dependent expression A superfamily, HNS-dependent expression A/B, HNS-dependent expression A, HNS-dependent expression A/B superfamily	GO:0030288, GO:0071468, GO:0030288, GO:0071468
NZ_CP050969.1_204_23	520999.PROVALCAL_03391	0	1302.7	Providencia	gyrA	GO:0003674,GO:0003676,GO:0003677,GO:0003824,GO:0003916,GO:0003918,GO:0005488,GO:0005515,GO:0005575,GO:0005622,GO:0005623,GO:0005737,GO:0005829,GO:0006139,GO:0006259,GO:0006265,GO:0006351,GO:0006725,GO:0006807,GO:0006996,GO:0008094,GO:0008150,GO:0008152,GO:0009058,GO:0009059,GO:0009987,GO:0010467,GO:0016043,GO:0016070,GO:0016462,GO:0016787,GO:0016817,GO:0016818,GO:0016853,GO:0016887,GO:0017111,GO:…	5.99.1.3	ko:K02469,ko:K02621					ko00000,ko01000,ko02048,ko03032,ko03036,ko03400				Bacteria	1MUGG@1224,1RN03@1236,3Z6WK@586,COG0188@1,COG0188@2	NA|NA|NA	L	A type II topoisomerase that negatively supercoils closed circular double-stranded (ds) DNA in an ATP-dependent manner to modulate DNA topology and maintain chromosomes in an underwound state. Negative supercoiling favors strand separation, and DNA replication, transcription, recombination and repair, all of which involve strand separation. Also able to catalyze the interconversion of other topol…	Gene3D, MobiDBLite, MobiDBLite, SUPERFAMILY, TIGRFAM, SUPERFAMILY, CDD, Gene3D, Pfam, Hamap, Gene3D, SMART, Gene3D, PANTHER, Coils, PANTHER, Pfam, Pfam, Pfam, Pfam, Pfam, Pfam	G3DSA:1.10.268.10, mobidb-lite, mobidb-lite, SSF101904, TIGR01063, SSF56719, cd00187, G3DSA:2.120.10.90, PF00521, MF_01897, G3DSA:3.30.1360.40, SM00434, G3DSA:3.90.199.10, PTHR43493:SF5, Coil, PTHR43493, PF03989, PF03989, PF03989, PF03989, PF03989, PF03989	consensus disorder prediction, consensus disorder prediction, gyrA: DNA gyrase, A subunit, TOP4c, DNA gyrase/topoisomerase IV, subunit A, DNA gyrase subunit A [gyrA]., DNA gyrase C-terminal domain, beta-propeller, DNA gyrase C-terminal domain, beta-propeller, DNA gyrase C-terminal domain, beta-propeller, DNA gyrase C-terminal domain, beta-propeller, DNA gyrase C-terminal domain, beta-propeller, D…	IPR013757, IPR035516, IPR013760, IPR002205, IPR035516, IPR002205, IPR005743, IPR002205, IPR013758, IPR006691, IPR006691, IPR006691, IPR006691, IPR006691, IPR006691	Type IIA DNA topoisomerase subunit A, alpha-helical domain superfamily, DNA gyrase/topoisomerase IV, subunit A, C-terminal, DNA topoisomerase, type IIA-like domain superfamily, DNA topoisomerase, type IIA, subunit A/C-terminal, DNA gyrase/topoisomerase IV, subunit A, C-terminal, DNA topoisomerase, type IIA, subunit A/C-terminal, DNA gyrase, subunit A, DNA topoisomerase, type IIA, subunit A/C-term…	GO:0003677, GO:0003918, GO:0005524,GO:0003918, GO:0005524, GO:0003677, GO:0003918, GO:0005524, GO:0006265, GO:0003677, GO:0003918, GO:0005524, GO:0006265, GO:0003677, GO:0003918, GO:0005524, GO:0005694, GO:0006265, GO:0003677, GO:0003918, GO:0005524, GO:0006265, GO:0003677, GO:0003918, GO:0005524, GO:0006259, GO:0006265, GO:0003677, GO:0003916, GO:0005524, GO:0005694, GO:0006265, GO:0003677, GO:0…	Reactome: R-HSA-4615885,Reactome: R-HSA-4615885, Reactome: R-HSA-4615885, Reactome: R-HSA-4615885, Reactome: R-HSA-4615885, Reactome: R-HSA-4615885, nan]
NZ_CP050969.1_204_24	158822.LH89_06445	3.8e-104	384.4	Gammaproteobacteria	ubiG	GO:0003674,GO:0003824,GO:0005488,GO:0005543,GO:0005575,GO:0005622,GO:0005623,GO:0005737,GO:0005829,GO:0006732,GO:0006733,GO:0006743,GO:0006744,GO:0006950,GO:0006970,GO:0006972,GO:0008150,GO:0008152,GO:0008168,GO:0008171,GO:0008289,GO:0008689,GO:0008757,GO:0009058,GO:0009108,GO:0009628,GO:0009651,GO:0009987,GO:0016740,GO:0016741,GO:0032259,GO:0042180,GO:0042181,GO:0042538,GO:0043167,GO:0043168,GO:…	2.1.1.222,2.1.1.64	ko:K00568	ko00130,ko01100,ko01110,map00130,map01100,map01110	M00117	R04988,R05614,R08769,R08781	RC00003,RC00392,RC01895	ko00000,ko00001,ko00002,ko01000			iE2348C_1286.E2348C_2376	Bacteria	1MU89@1224,1RMV7@1236,COG2227@1,COG2227@2	NA|NA|NA	H	O-methyltransferase that catalyzes the 2 O-methylation steps in the ubiquinone biosynthetic pathway	Hamap, TIGRFAM, Gene3D, Pfam, SUPERFAMILY, PANTHER, PANTHER, CDD	MF_00472, TIGR01983, G3DSA:3.40.50.150, PF13489, SSF53335, PTHR43464:SF15, PTHR43464, cd02440	Ubiquinone biosynthesis O-methyltransferase [ubiG]., UbiG: 3-demethylubiquinone-9 3-O-methyltransferase, Methyltransferase domain, AdoMet_MTases	IPR010233, IPR010233, IPR029063	Ubiquinone biosynthesis O-methyltransferase, Ubiquinone biosynthesis O-methyltransferase, S-adenosyl-L-methionine-dependent methyltransferase	GO:0006744, GO:0008425, GO:0006744, GO:0008425	KEGG: 00130+2.1.1.222+2.1.1.64|MetaCyc: PWY-5855|MetaCyc: PWY-5856|MetaCyc: PWY-5857|MetaCyc: PWY-5870|MetaCyc: PWY-5871|MetaCyc: PWY-5872|MetaCyc: PWY-5873|MetaCyc: PWY-6708|MetaCyc: PWY-7230|MetaCyc: PWY-7233|Reactome: R-HSA-2142789, KEGG: 00130+2.1.1.222+2.1.1.64|MetaCyc: PWY-5855|MetaCyc: PWY-5856|MetaCyc: PWY-5857|MetaCyc: PWY-5870|MetaCyc: PWY-5871|MetaCyc: PWY-5872|MetaCyc: PWY-5873|MetaCy…
NZ_CP050969.1_204_25	675812.VHA_001447	1.3e-58	233	Vibrionales	gph	GO:0000270,GO:0003674,GO:0003824,GO:0005575,GO:0005622,GO:0005623,GO:0005737,GO:0005829,GO:0006022,GO:0006040,GO:0006082,GO:0006139,GO:0006259,GO:0006281,GO:0006725,GO:0006793,GO:0006796,GO:0006807,GO:0006950,GO:0006974,GO:0008150,GO:0008152,GO:0008967,GO:0009254,GO:0009987,GO:0016311,GO:0016787,GO:0016788,GO:0016791,GO:0019752,GO:0030203,GO:0033554,GO:0034641,GO:0042578,GO:0043170,GO:0043436,GO:…	3.1.3.105,3.1.3.18	ko:K01091,ko:K22292	ko00520,ko00630,ko01100,ko01110,ko01130,map00520,map00630,map01100,map01110,map01130		R01334,R11785	RC00017	ko00000,ko00001,ko01000				Bacteria	1RCXJ@1224,1S3VU@1236,1XX0T@135623,COG0546@1,COG0546@2	NA|NA|NA	S	HAD-hyrolase-like	SFLD, SFLD, TIGRFAM, TIGRFAM, Pfam, Gene3D, SUPERFAMILY, PANTHER, TIGRFAM, Gene3D, PANTHER	SFLDG01135, SFLDG01129, TIGR01509, TIGR01449, PF13419, G3DSA:3.40.50.1000, SSF56784, PTHR43434:SF4, TIGR01549, G3DSA:1.10.150.240, PTHR43434	C1.5.6: HAD, Beta-PGM, Phosphatase Like, C1.5: HAD, Beta-PGM, Phosphatase Like, HAD-SF-IA-v3: HAD hydrolase, family IA, variant 3, PGP_bact: phosphoglycolate phosphatase, bacterial, Haloacid dehalogenase-like hydrolase, HAD-SF-IA-v1: HAD hydrolase, family IA, variant 1	IPR006439, IPR006346, IPR023214, IPR036412, IPR006439, IPR023198	HAD hydrolase, subfamily IA, 2-phosphoglycolate phosphatase-like, prokaryotic, HAD superfamily, HAD-like superfamily, HAD hydrolase, subfamily IA, Phosphoglycolate phosphatase-like, domain 2	GO:0016787, GO:0016791,GO:0016787	KEGG: 00630+3.1.3.18|MetaCyc: PWY-181
NZ_CP050969.1_204_27	158822.LH89_06450	0	1362.4	Gammaproteobacteria	nrdA	GO:0000166,GO:0003674,GO:0003824,GO:0004748,GO:0005488,GO:0005515,GO:0005524,GO:0005575,GO:0005622,GO:0005623,GO:0005737,GO:0005829,GO:0005971,GO:0006139,GO:0006725,GO:0006753,GO:0006793,GO:0006796,GO:0006807,GO:0008144,GO:0008150,GO:0008152,GO:0009058,GO:0009117,GO:0009165,GO:0009262,GO:0009263,GO:0009987,GO:0015949,GO:0016491,GO:0016725,GO:0016728,GO:0017076,GO:0018130,GO:0019438,GO:0019637,GO:…	1.17.4.1	ko:K00525	ko00230,ko00240,ko01100,map00230,map00240,map01100	M00053	R02017,R02018,R02019,R02024	RC00613	ko00000,ko00001,ko00002,ko01000,ko03400			iSDY_1059.SDY_2428	Bacteria	1MUJ8@1224,1RMPV@1236,COG0209@1,COG0209@2	NA|NA|NA	F	Provides the precursors necessary for DNA synthesis. Catalyzes the biosynthesis of deoxyribonucleotides from the corresponding ribonucleotides	SUPERFAMILY, SUPERFAMILY, ProSitePatterns, Pfam, PANTHER, PANTHER, TIGRFAM, ProSiteProfiles, PANTHER, PANTHER, PRINTS, PRINTS, PRINTS, PRINTS, PRINTS, PRINTS, Pfam, Gene3D, Gene3D, Pfam	SSF48168, SSF51998, PS00089, PF03477, PTHR11573:SF6, PTHR11573:SF6, TIGR02506, PS51161, PTHR11573, PTHR11573, PR01183, PR01183, PR01183, PR01183, PR01183, PR01183, PF02867, G3DSA:1.10.1650.20, G3DSA:3.20.70.20, PF00317	Ribonucleotide reductase large subunit signature., ATP cone domain, NrdE_NrdA: ribonucleoside-diphosphate reductase, alpha subunit, ATP-cone domain profile., Ribonucleotide reductase large chain signature, Ribonucleotide reductase large chain signature, Ribonucleotide reductase large chain signature, Ribonucleotide reductase large chain signature, Ribonucleotide reductase large chain signature, R…	IPR008926, IPR000788, IPR005144, IPR013346, IPR005144, IPR039718, IPR039718, IPR000788, IPR000788, IPR000788, IPR000788, IPR000788, IPR000788, IPR000788, IPR013509	Ribonucleotide reductase R1 subunit, N-terminal, Ribonucleotide reductase large subunit, C-terminal, ATP-cone domain, Ribonucleotide reductase, class I , alpha subunit, ATP-cone domain, Ribonucleoside-diphosphate reductase large subunit, Ribonucleoside-diphosphate reductase large subunit, Ribonucleotide reductase large subunit, C-terminal, Ribonucleotide reductase large subunit, C-terminal, Ribon…	GO:0006260, GO:0055114, GO:0055114, GO:0006260, GO:0055114, GO:0006260, GO:0055114, GO:0006260, GO:0055114, GO:0006260, GO:0055114, GO:0006260, GO:0055114, GO:0006260, GO:0055114, GO:0006260, GO:0055114, GO:0004748, GO:0005524, GO:0006260, GO:0055114	KEGG: 00230+1.17.4.1|KEGG: 00240+1.17.4.1|KEGG: 00480+1.17.4.1|KEGG: 00983+1.17.4.1|MetaCyc: PWY-6545|MetaCyc: PWY-7184|MetaCyc: PWY-7198|MetaCyc: PWY-7210|MetaCyc: PWY-7220|MetaCyc: PWY-7222|MetaCyc: PWY-7226|MetaCyc: PWY-7227|Reactome: R-HSA-499943, KEGG: 00230+1.17.4.1|KEGG: 00240+1.17.4.1|KEGG: 00480+1.17.4.1|KEGG: 00983+1.17.4.1|MetaCyc: PWY-6545|MetaCyc: PWY-7184|MetaCyc: PWY-7198|MetaCyc: …
NZ_CP050969.1_204_28	1453496.AT03_14350	1.6e-189	668.7	Gammaproteobacteria	nrdB	GO:0003674,GO:0005488,GO:0005506,GO:0005515,GO:0005575,GO:0005622,GO:0005623,GO:0005737,GO:0005829,GO:0005971,GO:0006139,GO:0006725,GO:0006753,GO:0006793,GO:0006796,GO:0006807,GO:0008150,GO:0008152,GO:0009058,GO:0009117,GO:0009165,GO:0009262,GO:0009263,GO:0009987,GO:0015949,GO:0018130,GO:0019438,GO:0019637,GO:0032991,GO:0034641,GO:0034654,GO:0042802,GO:0043167,GO:0043169,GO:0044237,GO:0044238,GO:…	1.17.4.1	ko:K00526	ko00230,ko00240,ko01100,map00230,map00240,map01100	M00053	R02017,R02018,R02019,R02024	RC00613	ko00000,ko00001,ko00002,ko01000,ko03400			iAPECO1_1312.APECO1_4325	Bacteria	1MWUS@1224,1RMJC@1236,COG0208@1,COG0208@2	NA|NA|NA	F	Provides the precursors necessary for DNA synthesis. Catalyzes the biosynthesis of deoxyribonucleotides from the corresponding ribonucleotides	Gene3D, CDD, PANTHER, Pfam, PANTHER, ProSitePatterns, SUPERFAMILY	G3DSA:1.10.620.20, cd01049, PTHR23409:SF18, PF00268, PTHR23409, PS00368, SSF47240	RNRR2, Ribonucleotide reductase, small chain, Ribonucleotide reductase small subunit signature.	IPR012348, IPR033909, IPR000358, IPR000358, IPR030475, IPR009078	Ribonucleotide reductase-like, Ribonucleotide reductase small subunit, Ribonucleotide reductase small subunit family, Ribonucleotide reductase small subunit family, Ribonucleotide reductase small subunit, acitve site, Ferritin-like superfamily	GO:0016491, GO:0055114, GO:0009263, GO:0055114, GO:0055114	Reactome: R-HSA-499943, KEGG: 00230+1.17.4.1|KEGG: 00240+1.17.4.1|KEGG: 00480+1.17.4.1|KEGG: 00983+1.17.4.1|MetaCyc: PWY-6545|MetaCyc: PWY-7184|MetaCyc: PWY-7198|MetaCyc: PWY-7210|MetaCyc: PWY-7220|MetaCyc: PWY-7222|MetaCyc: PWY-7226|MetaCyc: PWY-7227|Reactome: R-HSA-499943, KEGG: 00230+1.17.4.1|KEGG: 00240+1.17.4.1|KEGG: 00480+1.17.4.1|KEGG: 00983+1.17.4.1|MetaCyc: PWY-6545|MetaCyc: PWY-7184|Met…
NZ_CP050969.1_204_29	1120953.AUBH01000001_gene1098	2.5e-17	95.1	Alteromonadaceae	yfaE	GO:0003674,GO:0003824,GO:0005488,GO:0005575,GO:0005622,GO:0005623,GO:0005737,GO:0006091,GO:0006124,GO:0006464,GO:0006807,GO:0008150,GO:0008152,GO:0009055,GO:0009987,GO:0016491,GO:0019538,GO:0022900,GO:0030091,GO:0036211,GO:0043170,GO:0043412,GO:0044237,GO:0044238,GO:0044260,GO:0044267,GO:0044424,GO:0044464,GO:0048037,GO:0051536,GO:0051537,GO:0051540,GO:0055114,GO:0071704,GO:1901564		ko:K11107					ko00000				Bacteria	1N6XY@1224,1SC8M@1236,468AJ@72275,COG1018@1,COG1018@2	NA|NA|NA	C	COG0633 Ferredoxin	CDD, SUPERFAMILY, ProSitePatterns, Pfam, Gene3D	cd00207, SSF54292, PS00197, PF00111, G3DSA:3.10.20.30	fer2, 2Fe-2S ferredoxin-type iron-sulfur binding region signature., 2Fe-2S iron-sulfur cluster binding domain	IPR001041, IPR036010, IPR006058, IPR001041, IPR012675	2Fe-2S ferredoxin-type iron-sulfur binding domain, 2Fe-2S ferredoxin-like superfamily, 2Fe-2S ferredoxin, iron-sulphur binding site, 2Fe-2S ferredoxin-type iron-sulfur binding domain, Beta-grasp domain superfamily	GO:0009055, GO:0051536, GO:0009055, GO:0051536, GO:0051537, GO:0009055, GO:0051536
NZ_CP050969.1_204_30	316275.VSAL_I1773	9.7e-95	354	Vibrionales	cinA	GO:0003674,GO:0003676,GO:0003677,GO:0005488,GO:0006139,GO:0006259,GO:0006725,GO:0006807,GO:0008150,GO:0008152,GO:0009987,GO:0034641,GO:0043170,GO:0044237,GO:0044238,GO:0044260,GO:0046483,GO:0071704,GO:0090304,GO:0097159,GO:1901360,GO:1901363	3.5.1.42	ko:K03742,ko:K03743	ko00760,map00760		R02322	RC00100	ko00000,ko00001,ko01000				Bacteria	1RH2Y@1224,1T236@1236,1Y364@135623,COG1058@1,COG1058@2,COG1546@1,COG1546@2	NA|NA|NA	S	Probable molybdopterin binding domain	Gene3D, CDD, SUPERFAMILY, Hamap, TIGRFAM, SUPERFAMILY, PANTHER, Pfam, PIRSF, TIGRFAM, Gene3D, PANTHER, SMART	G3DSA:3.90.950.20, cd00885, SSF53218, MF_00226_B, TIGR00177, SSF142433, PTHR13939:SF3, PF00994, PIRSF006728, TIGR00200, G3DSA:3.40.980.10, PTHR13939, SM00852	cinA, Putative competence-damage inducible protein [cinA]., molyb_syn: molybdenum cofactor synthesis domain, Probable molybdopterin binding domain, cinA_nterm: competence/damage-inducible protein CinA N-terminal domain	IPR036653, IPR001453, IPR036425, IPR008135, IPR001453, IPR036653, IPR001453, IPR008135, IPR008135, IPR036425, IPR001453	CinA-like, C-terminal, MoaB/Mog domain, MoaB/Mog-like domain superfamily, Competence-induced protein CinA, MoaB/Mog domain, CinA-like, C-terminal, MoaB/Mog domain, Competence-induced protein CinA, Competence-induced protein CinA, MoaB/Mog-like domain superfamily, MoaB/Mog domain
NZ_CP050969.1_204_31	1006004.GBAG_1949	3.2e-119	435.3	Gammaproteobacteria	tyrP	GO:0003333,GO:0003674,GO:0005215,GO:0005575,GO:0005623,GO:0005886,GO:0005887,GO:0006810,GO:0006811,GO:0006820,GO:0006865,GO:0008150,GO:0015291,GO:0015293,GO:0015711,GO:0015849,GO:0016020,GO:0016021,GO:0022804,GO:0022857,GO:0031224,GO:0031226,GO:0034220,GO:0044425,GO:0044459,GO:0044464,GO:0046942,GO:0051179,GO:0051234,GO:0055085,GO:0071702,GO:0071705,GO:0071944,GO:0098656,GO:1903825,GO:1905039		ko:K03834					ko00000,ko02000	2.A.42.1.1		iECUMN_1333.ECUMN_2202	Bacteria	1N35H@1224,1RNNC@1236,COG0814@1,COG0814@2	NA|NA|NA	E	amino acid	Gene3D, ProSitePatterns, PRINTS, PRINTS, PRINTS, PRINTS, PRINTS, PRINTS, PRINTS, PRINTS, PRINTS, PANTHER, TIGRFAM, Pfam, PANTHER	G3DSA:1.20.1740.10, PS00594, PR00166, PR00166, PR00166, PR00166, PR00166, PR00166, PR00166, PR00166, PR00166, PTHR32195, TIGR00837, PF03222, PTHR32195:SF21	Aromatic amino acids permeases signature., Aromatic amino acid permease signature, Aromatic amino acid permease signature, Aromatic amino acid permease signature, Aromatic amino acid permease signature, Aromatic amino acid permease signature, Aromatic amino acid permease signature, Aromatic amino acid permease signature, Aromatic amino acid permease signature, Aromatic amino acid permease signatu…	IPR013061, IPR013059, IPR013059, IPR013059, IPR013059, IPR013059, IPR013059, IPR013059, IPR013059, IPR013059, IPR013059, IPR013059, IPR018227	Tryptophan/tryrosine permease, conserved site, Tryptophan/tyrosine transporter, Tryptophan/tyrosine transporter, Tryptophan/tyrosine transporter, Tryptophan/tyrosine transporter, Tryptophan/tyrosine transporter, Tryptophan/tyrosine transporter, Tryptophan/tyrosine transporter, Tryptophan/tyrosine transporter, Tryptophan/tyrosine transporter, Tryptophan/tyrosine transporter, Tryptophan/tyrosine tr…	GO:0005887, GO:0015173, GO:0015801, GO:0005887, GO:0015173, GO:0015801, GO:0005887, GO:0015173, GO:0015801, GO:0005887, GO:0015173, GO:0015801, GO:0005887, GO:0015173, GO:0015801, GO:0005887, GO:0015173, GO:0015801, GO:0005887, GO:0015173, GO:0015801, GO:0005887, GO:0015173, GO:0015801, GO:0005887, GO:0015173, GO:0015801, GO:0005887, GO:0015173, GO:0015801, GO:0005887, GO:0015173, GO:0015801, GO:…
NZ_CP050969.1_204_32	1453496.AT03_14455	6e-134	484.2	Gammaproteobacteria	tyrP	GO:0003333,GO:0003674,GO:0005215,GO:0005575,GO:0005623,GO:0005886,GO:0005887,GO:0006810,GO:0006811,GO:0006820,GO:0006865,GO:0008150,GO:0015291,GO:0015293,GO:0015711,GO:0015849,GO:0016020,GO:0016021,GO:0022804,GO:0022857,GO:0031224,GO:0031226,GO:0034220,GO:0044425,GO:0044459,GO:0044464,GO:0046942,GO:0051179,GO:0051234,GO:0055085,GO:0071702,GO:0071705,GO:0071944,GO:0098656,GO:1903825,GO:1905039		ko:K03834,ko:K03835,ko:K03837,ko:K03838					ko00000,ko02000	2.A.42.1.1,2.A.42.1.2,2.A.42.2.1,2.A.42.2.2		iECUMN_1333.ECUMN_2202	Bacteria	1N35H@1224,1RNNC@1236,COG0814@1,COG0814@2	NA|NA|NA	E	amino acid	TIGRFAM, PANTHER, Gene3D, ProSitePatterns, PANTHER, PRINTS, PRINTS, PRINTS, PRINTS, PRINTS, PRINTS, PRINTS, PRINTS, PRINTS, Pfam	TIGR00837, PTHR32195:SF21, G3DSA:1.20.1740.10, PS00594, PTHR32195, PR00166, PR00166, PR00166, PR00166, PR00166, PR00166, PR00166, PR00166, PR00166, PF03222	araaP: aromatic amino acid transport protein, Aromatic amino acids permeases signature., Aromatic amino acid permease signature, Aromatic amino acid permease signature, Aromatic amino acid permease signature, Aromatic amino acid permease signature, Aromatic amino acid permease signature, Aromatic amino acid permease signature, Aromatic amino acid permease signature, Aromatic amino acid permease s…	IPR013059, IPR013061, IPR013059, IPR013059, IPR013059, IPR013059, IPR013059, IPR013059, IPR013059, IPR013059, IPR013059, IPR013059, IPR018227	Tryptophan/tyrosine transporter, Tryptophan/tryrosine permease, conserved site, Tryptophan/tyrosine transporter, Tryptophan/tyrosine transporter, Tryptophan/tyrosine transporter, Tryptophan/tyrosine transporter, Tryptophan/tyrosine transporter, Tryptophan/tyrosine transporter, Tryptophan/tyrosine transporter, Tryptophan/tyrosine transporter, Tryptophan/tyrosine transporter, Tryptophan/tyrosine tr…	GO:0005887, GO:0015173, GO:0015801, GO:0005887, GO:0015173, GO:0015801, GO:0005887, GO:0015173, GO:0015801, GO:0005887, GO:0015173, GO:0015801, GO:0005887, GO:0015173, GO:0015801, GO:0005887, GO:0015173, GO:0015801, GO:0005887, GO:0015173, GO:0015801, GO:0005887, GO:0015173, GO:0015801, GO:0005887, GO:0015173, GO:0015801, GO:0005887, GO:0015173, GO:0015801, GO:0005887, GO:0015173, GO:0015801, GO:…
NZ_CP050969.1_204_33	910964.GEAM_0171	4e-158	564.7	Gammaproteobacteria	sdaC	GO:0005575,GO:0005623,GO:0005886,GO:0005887,GO:0016020,GO:0016021,GO:0031224,GO:0031226,GO:0044425,GO:0044459,GO:0044464,GO:0071944		ko:K03837					ko00000,ko02000	2.A.42.2.1		iAPECO1_1312.APECO1_3735,iE2348C_1286.E2348C_3063,iECABU_c1320.ECABU_c30650,iECED1_1282.ECED1_3249,iECNA114_1301.ECNA114_2835,iECOK1_1307.ECOK1_3172,iECP_1309.ECP_2778,iECS88_1305.ECS88_3065,iECSF_1327.ECSF_2587,iEcSMS35_1347.EcSMS35_2936,iLF82_1304.LF82_2096,iNRG857_1313.NRG857_13695,iPC815.YPO1321,iSDY_1059.SDY_3013,iUMN146_1321.UM146_02585,iUTI89_1310.UTI89_C3167,iYL1228.KPN_03139,ic_1306.c3364	Bacteria	1NQFA@1224,1RQ8Q@1236,COG0814@1,COG0814@2	NA|NA|NA	E	Serine transporter	Pfam, PANTHER, PANTHER, TIGRFAM	PF03222, PTHR35334, PTHR35334:SF2, TIGR00814	Tryptophan/tyrosine permease family, stp: serine transporter	IPR018227, IPR004694	Amino acid/polyamine transporter 2, Hydroxy amino acid transporter	GO:0003333, GO:0006865, GO:0015171, GO:0016021
NZ_CP050969.1_204_34	998088.B565_0563	1.7e-42	179.1	Gammaproteobacteria	elaA	GO:0003674,GO:0003824,GO:0006464,GO:0006473,GO:0006807,GO:0008150,GO:0008152,GO:0009987,GO:0016740,GO:0016746,GO:0016747,GO:0019538,GO:0036211,GO:0043170,GO:0043412,GO:0043543,GO:0044237,GO:0044238,GO:0044260,GO:0044267,GO:0071704,GO:1901564		ko:K02348					ko00000				Bacteria	1MZHA@1224,1S9IF@1236,COG2153@1,COG2153@2	NA|NA|NA	S	Acyltransferase	PANTHER, SUPERFAMILY, Pfam, Gene3D, ProSiteProfiles, PANTHER	PTHR43072, SSF55729, PF13673, G3DSA:3.40.630.30, PS51186, PTHR43072:SF9	Acetyltransferase (GNAT) domain, Gcn5-related N-acetyltransferase (GNAT) domain profile.	IPR016181, IPR000182, IPR000182	Acyl-CoA N-acyltransferase, GNAT domain, GNAT domain
NZ_CP050969.1_204_35	1121015.N789_06835	3.4e-39	167.9	Xanthomonadales													Bacteria	1RIFC@1224,1S6DF@1236,1X6KK@135614,COG0454@1,COG0454@2	NA|NA|NA	K	Acetyltransferase (GNAT) domain	Gene3D, PANTHER, ProSiteProfiles, Pfam, CDD, SUPERFAMILY	G3DSA:3.40.630.30, PTHR43233, PS51186, PF13508, cd04301, SSF55729	Gcn5-related N-acetyltransferase (GNAT) domain profile., Acetyltransferase (GNAT) domain, NAT_SF	IPR000182, IPR000182, IPR016181	GNAT domain, GNAT domain, Acyl-CoA N-acyltransferase
NZ_CP050969.1_204_36	1249634.D781_3072	4.6e-131	474.9	Serratia	menE	GO:0003674,GO:0003824,GO:0005488,GO:0005515,GO:0006732,GO:0008150,GO:0008152,GO:0008756,GO:0009058,GO:0009108,GO:0009233,GO:0009234,GO:0009987,GO:0016043,GO:0016405,GO:0016874,GO:0016877,GO:0016878,GO:0022607,GO:0042180,GO:0042181,GO:0042802,GO:0043933,GO:0044085,GO:0044237,GO:0044249,GO:0044281,GO:0044283,GO:0051186,GO:0051188,GO:0051259,GO:0051260,GO:0051262,GO:0051289,GO:0065003,GO:0071704,GO:…	4.2.1.113,6.2.1.26	ko:K01911,ko:K02549	ko00130,ko01100,ko01110,map00130,map01100,map01110	M00116	R04030,R04031	RC00004,RC00014,RC01053	ko00000,ko00001,ko00002,ko01000			iECNA114_1301.ECNA114_2354,iECSF_1327.ECSF_2141,iEcE24377_1341.EcE24377A_2556,iEcHS_1320.EcHS_A2406,iJN678.menE,iLF82_1304.LF82_1314,iNRG857_1313.NRG857_11465	Bacteria	1MW0Y@1224,1RN35@1236,402H6@613,COG0318@1,COG0318@2	NA|NA|NA	IQ	O-succinylbenzoic acid--CoA ligase	Gene3D, SUPERFAMILY, PANTHER, Pfam, Gene3D, TIGRFAM, PANTHER, Pfam, CDD	G3DSA:3.40.50.12780, SSF56801, PTHR24096:SF297, PF13193, G3DSA:3.30.300.30, TIGR01923, PTHR24096, PF00501, cd05912	AMP-binding enzyme C-terminal domain, menE: O-succinylbenzoate-CoA ligase, AMP-binding enzyme, OSB_CoA_lg	IPR025110, IPR010192, IPR000873, IPR010192	AMP-binding enzyme, C-terminal domain, 2-succinylbenzoate--CoA ligase, AMP-dependent synthetase/ligase, 2-succinylbenzoate--CoA ligase	GO:0005524, GO:0008756, GO:0009234, GO:0003824, GO:0005524, GO:0008756, GO:0009234	KEGG: 00130+6.2.1.26|MetaCyc: PWY-5837, KEGG: 00130+6.2.1.26|MetaCyc: PWY-5837
NZ_CP050969.1_204_37	1524467.IV04_05850	1.5e-132	479.2	Serratia	menC	GO:0003674,GO:0003824,GO:0006732,GO:0008150,GO:0008152,GO:0009058,GO:0009108,GO:0009233,GO:0009234,GO:0009987,GO:0016829,GO:0016835,GO:0016836,GO:0042180,GO:0042181,GO:0044237,GO:0044249,GO:0044281,GO:0044283,GO:0051186,GO:0051188,GO:0071704,GO:1901576,GO:1901661,GO:1901663	4.2.1.113	ko:K02549	ko00130,ko01100,ko01110,map00130,map01100,map01110	M00116	R04031	RC01053	ko00000,ko00001,ko00002,ko01000			iE2348C_1286.E2348C_2406,iSbBS512_1146.SbBS512_E2640	Bacteria	1MV33@1224,1RRC0@1236,401I3@613,COG1441@1,COG1441@2	NA|NA|NA	H	Converts 2-succinyl-6-hydroxy-2,4-cyclohexadiene-1- carboxylate (SHCHC) to 2-succinylbenzoate (OSB)	SFLD, TIGRFAM, SFLD, Pfam, Gene3D, SMART, SUPERFAMILY, PANTHER, Hamap, CDD, Gene3D, SUPERFAMILY	SFLDF00009, TIGR01927, SFLDS00001, PF13378, G3DSA:3.30.390.10, SM00922, SSF51604, PTHR42969, MF_00470, cd03320, G3DSA:3.20.20.120, SSF54826	o-succinylbenzoate synthase, menC_gamma/gm+: o-succinylbenzoate synthase, Enolase, Enolase C-terminal domain-like,o-succinylbenzoate synthase [menC]., OSBS	IPR034390, IPR029065, IPR029017, IPR013342, IPR036849, IPR010196, IPR036849	Enolase-like superfamily, Enolase C-terminal domain-like, Enolase-like, N-terminal, Mandelate racemase/muconate lactonizing enzyme, C-terminal, Enolase-like, C-terminal domain superfamily, o-Succinylbenzoate synthase, MenC type1, Enolase-like, C-terminal domain superfamily	GO:0046872, GO:0000287, GO:0009234, GO:0016836	KEGG: 00130+4.2.1.113|MetaCyc: PWY-5837
NZ_CP050969.1_204_38	667121.ET1_09_00650	1.4e-158	565.5	Gammaproteobacteria	menB	GO:0003674,GO:0003824,GO:0005488,GO:0005575,GO:0005622,GO:0005623,GO:0005737,GO:0005829,GO:0006732,GO:0008150,GO:0008152,GO:0008935,GO:0009058,GO:0009108,GO:0009233,GO:0009234,GO:0009987,GO:0016829,GO:0016830,GO:0016833,GO:0042180,GO:0042181,GO:0043167,GO:0043168,GO:0044237,GO:0044249,GO:0044281,GO:0044283,GO:0044424,GO:0044444,GO:0044464,GO:0051186,GO:0051188,GO:0071704,GO:0071890,GO:1901576,GO:…	4.1.3.36	ko:K01661	ko00130,ko01100,ko01110,map00130,map01100,map01110	M00116	R07263	RC01923	ko00000,ko00001,ko00002,ko01000			iJN678.menB,iYL1228.KPN_02660	Bacteria	1QTZ2@1224,1T1TZ@1236,COG0447@1,COG0447@2	NA|NA|NA	H	Converts o-succinylbenzoyl-CoA (OSB-CoA) to 1,4- dihydroxy-2-naphthoyl-CoA (DHNA-CoA)	PANTHER, ProSitePatterns, SUPERFAMILY, Gene3D, CDD, Hamap, PANTHER, Gene3D, TIGRFAM, Pfam	PTHR43113, PS00166, SSF52096, G3DSA:1.10.12.10, cd06558, MF_01934, PTHR43113:SF1, G3DSA:3.90.226.10, TIGR01929, PF00378	Enoyl-CoA hydratase/isomerase signature., crotonase-like, 1,4-dihydroxy-2-naphthoyl-CoA synthase [menB]., menB: naphthoate synthase, Enoyl-CoA hydratase/isomerase	IPR010198, IPR018376, IPR029045, IPR014748, IPR010198, IPR010198, IPR001753	1,4-Dihydroxy-2-naphthoyl-CoA synthase, MenB, Enoyl-CoA hydratase/isomerase, conserved site, ClpP/crotonase-like domain superfamily, Enoyl-CoA hydratase, C-terminal, 1,4-Dihydroxy-2-naphthoyl-CoA synthase, MenB, 1,4-Dihydroxy-2-naphthoyl-CoA synthase, MenB, Enoyl-CoA hydratase/isomerase	GO:0008935, GO:0009234, GO:0003824, GO:0008935, GO:0009234, GO:0008935, GO:0009234, GO:0003824	KEGG: 00130+4.1.3.36|MetaCyc: PWY-5837,KEGG: 00130+4.1.3.36|MetaCyc: PWY-5837, KEGG: 00130+4.1.3.36|MetaCyc: PWY-5837
NZ_CP050969.1_204_39	561231.Pecwa_3202	2.2e-72	279.3	Pectobacterium	menH	GO:0003674,GO:0003824,GO:0005575,GO:0005622,GO:0005623,GO:0005737,GO:0005829,GO:0006732,GO:0008150,GO:0008152,GO:0009058,GO:0009108,GO:0009233,GO:0009234,GO:0009987,GO:0016787,GO:0016829,GO:0016835,GO:0042180,GO:0042181,GO:0044237,GO:0044249,GO:0044281,GO:0044283,GO:0044424,GO:0044444,GO:0044464,GO:0051186,GO:0051188,GO:0070205,GO:0071704,GO:1901576,GO:1901661,GO:1901663	4.2.99.20	ko:K08680	ko00130,ko01100,ko01110,map00130,map01100,map01110	M00116	R08166	RC02148,RC02475	ko00000,ko00001,ko00002,ko01000			iAPECO1_1312.APECO1_4298,iEC55989_1330.EC55989_2511,iECO103_1326.ECO103_2730,iECOK1_1307.ECOK1_2500,iECS88_1305.ECS88_2414,iETEC_1333.ETEC_2398,iEcE24377_1341.EcE24377A_2559,iSBO_1134.SBO_2300,iUMN146_1321.UM146_05480,iUTI89_1310.UTI89_C2547	Bacteria	1MRV2@122277,1R3WK@1224,1RQHH@1236,COG0596@1,COG0596@2	NA|NA|NA	H	Catalyzes a proton abstraction reaction that results in 2,5-elimination of pyruvate from 2-succinyl-5-enolpyruvyl-6- hydroxy-3-cyclohexene-1-carboxylate (SEPHCHC) and the formation of 2-succinyl-6-hydroxy-2,4-cyclohexadiene-1-carboxylate (SHCHC)	PANTHER, TIGRFAM, Pfam, Gene3D, SUPERFAMILY, MobiDBLite, Hamap	PTHR10992, TIGR03695, PF12697, G3DSA:3.40.50.1820, SSF53474, mobidb-lite, MF_01660	menH_SHCHC: 2-succinyl-6-hydroxy-2,4-cyclohexadiene-1-carboxylate synthase, Alpha/beta hydrolase family, consensus disorder prediction, 2-succinyl-6-hydroxy-2,4-cyclohexadiene-1-carboxylate synthase [menH].	IPR022485, IPR000073, IPR029058, IPR029058, IPR022485	2-succinyl-6-hydroxy-2,4-cyclohexadiene-1-carboxylate synthase, Alpha/beta hydrolase fold-1, Alpha/Beta hydrolase fold, Alpha/Beta hydrolase fold, 2-succinyl-6-hydroxy-2,4-cyclohexadiene-1-carboxylate synthase	GO:0009234, GO:0070205,GO:0009234, GO:0070205	KEGG: 00130+4.2.99.20|MetaCyc: PWY-5837,KEGG: 00130+4.2.99.20|MetaCyc: PWY-5837
NZ_CP050969.1_204_4	675817.VDA_000571	3.3e-138	498	Vibrionales	msrP	GO:0000302,GO:0001101,GO:0003674,GO:0003824,GO:0005488,GO:0005575,GO:0005623,GO:0006807,GO:0006950,GO:0006979,GO:0008150,GO:0008152,GO:0009987,GO:0010035,GO:0016491,GO:0016667,GO:0016672,GO:0016675,GO:0019538,GO:0030091,GO:0030288,GO:0030313,GO:0031975,GO:0042221,GO:0042597,GO:0043170,GO:0043546,GO:0044237,GO:0044238,GO:0044260,GO:0044267,GO:0044464,GO:0048037,GO:0050662,GO:0050896,GO:0055114,GO:…		ko:K07147					ko00000,ko01000				Bacteria	1MUW0@1224,1RQ2J@1236,1XUE9@135623,COG2041@1,COG2041@2	NA|NA|NA	C	Part of the MsrPQ system that repairs oxidized periplasmic proteins containing methionine sulfoxide residues (Met-O), using respiratory chain electrons. Thus protects these proteins from oxidative-stress damage caused by reactive species of oxygen and chlorine generated by the host defense mechanisms. MsrPQ is essential for the maintenance of envelope integrity under bleach stress, rescuing a wid…	PANTHER, Pfam, Gene3D, PANTHER, SUPERFAMILY, Hamap	PTHR43032:SF3, PF00174, G3DSA:3.90.420.10, PTHR43032, SSF56524, MF_01206	Oxidoreductase molybdopterin binding domain, Protein-methionine-sulfoxide reductase catalytic subunit MsrP [msrP].	IPR000572, IPR036374, IPR036374, IPR022867	Oxidoreductase, molybdopterin-binding domain, Oxidoreductase, molybdopterin-binding domain superfamily, Oxidoreductase, molybdopterin-binding domain superfamily, Protein-methionine-sulfoxide reductase subunit MsrP	GO:0042128, GO:0042128, GO:0042128, GO:0016667, GO:0030091, GO:0043546, GO:0055114	Reactome: R-HSA-1614517, Reactome: R-HSA-1614517, Reactome: R-HSA-1614517
NZ_CP050969.1_204_40	399741.Spro_3283	7.5e-191	673.7	Serratia	menD	GO:0003674,GO:0003824,GO:0005488,GO:0006732,GO:0008150,GO:0008152,GO:0008683,GO:0009058,GO:0009108,GO:0009233,GO:0009234,GO:0009987,GO:0016740,GO:0016744,GO:0016829,GO:0016830,GO:0016831,GO:0016833,GO:0019842,GO:0030976,GO:0036094,GO:0042180,GO:0042181,GO:0043167,GO:0043168,GO:0043169,GO:0044237,GO:0044249,GO:0044281,GO:0044283,GO:0048037,GO:0050662,GO:0051186,GO:0051188,GO:0070204,GO:0071704,GO:…	2.2.1.9	ko:K02551	ko00130,ko01100,ko01110,map00130,map01100,map01110	M00116	R08165	RC02186	ko00000,ko00001,ko00002,ko01000			iSBO_1134.SBO_2301	Bacteria	1MVMZ@1224,1RNRS@1236,3ZZSW@613,COG1165@1,COG1165@2	NA|NA|NA	H	Catalyzes the thiamine diphosphate-dependent decarboxylation of 2-oxoglutarate and the subsequent addition of the resulting succinic semialdehyde-thiamine pyrophosphate anion to isochorismate to yield 2-succinyl-5-enolpyruvyl-6-hydroxy-3- cyclohexene-1-carboxylate (SEPHCHC)	Gene3D, CDD, SUPERFAMILY, Gene3D, SUPERFAMILY, PIRSF, Hamap, TIGRFAM, PANTHER, Pfam, SUPERFAMILY, Pfam, Gene3D, Pfam, CDD	G3DSA:3.40.50.1220, cd07037, SSF52518, G3DSA:3.40.50.970, SSF52518, PIRSF004983, MF_01659, TIGR00173, PTHR42916, PF02775, SSF52467, PF02776, G3DSA:3.40.50.970, PF16582, cd02009	TPP_PYR_MenD,2-succinyl-5-enolpyruvyl-6-hydroxy-3-cyclohexene-1-carboxylate synthase [menD]., menD: 2-succinyl-5-enolpyruvyl-6-hydroxy-3-cyclohexene-1-carboxylic-acid synthase, Thiamine pyrophosphate enzyme, C-terminal TPP binding domain, Thiamine pyrophosphate enzyme, N-terminal TPP binding domain, Middle domain of thiamine pyrophosphate, TPP_SHCHC_synthase	IPR029061, IPR029061, IPR004433, IPR004433, IPR004433, IPR004433, IPR011766, IPR029035, IPR012001, IPR032264	Thiamin diphosphate-binding fold, Thiamin diphosphate-binding fold, 2-succinyl-5-enolpyruvyl-6-hydroxy-3-cyclohexene-1-carboxylic-acid synthase, 2-succinyl-5-enolpyruvyl-6-hydroxy-3-cyclohexene-1-carboxylic-acid synthase, 2-succinyl-5-enolpyruvyl-6-hydroxy-3-cyclohexene-1-carboxylic-acid synthase, 2-succinyl-5-enolpyruvyl-6-hydroxy-3-cyclohexene-1-carboxylic-acid synthase, Thiamine pyrophosphate …	GO:0009234, GO:0030976, GO:0070204, GO:0009234, GO:0030976, GO:0070204, GO:0009234, GO:0030976, GO:0070204, GO:0009234, GO:0030976, GO:0070204, GO:0003824, GO:0030976, GO:0030976	KEGG: 00130+2.2.1.9|MetaCyc: PWY-5837, KEGG: 00130+2.2.1.9|MetaCyc: PWY-5837, KEGG: 00130+2.2.1.9|MetaCyc: PWY-5837, KEGG: 00130+2.2.1.9|MetaCyc: PWY-5837,KEGG: 00130+2.2.1.9|MetaCyc: PWY-5837
NZ_CP050969.1_204_41	1453496.AT03_14525	1.7e-121	443	Gammaproteobacteria	menF	GO:0000162,GO:0000287,GO:0003674,GO:0003824,GO:0004049,GO:0005488,GO:0005575,GO:0005622,GO:0005623,GO:0005737,GO:0005950,GO:0006082,GO:0006520,GO:0006568,GO:0006576,GO:0006586,GO:0006725,GO:0006732,GO:0006807,GO:0008150,GO:0008152,GO:0008652,GO:0008909,GO:0009058,GO:0009072,GO:0009073,GO:0009108,GO:0009233,GO:0009234,GO:0009308,GO:0009309,GO:0009987,GO:0016053,GO:0016829,GO:0016830,GO:0016833,GO:…	5.4.4.2	ko:K02361,ko:K02552	ko00130,ko01053,ko01100,ko01110,ko01130,map00130,map01053,map01100,map01110,map01130	M00116	R01717	RC00588	ko00000,ko00001,ko00002,ko01000			iECABU_c1320.ECABU_c26010,iECIAI39_1322.ECIAI39_2413,iSF_1195.SF2344,iS_1188.S2478,ic_1306.c2809	Bacteria	1MVB7@1224,1RNSR@1236,COG1169@1,COG1169@2	NA|NA|NA	H	Catalyzes the conversion of chorismate to isochorismate	TIGRFAM, Pfam, Hamap, PANTHER, SUPERFAMILY, Gene3D	TIGR00543, PF00425, MF_01935, PTHR42839, SSF56322, G3DSA:3.60.120.10	isochor_syn: isochorismate synthase, chorismate binding enzyme, Isochorismate synthase MenF [menF].	IPR004561, IPR015890, IPR034681, IPR005801, IPR005801	Isochorismate synthase, Chorismate-utilising enzyme, C-terminal, Isochorismate synthase MenF, ADC synthase, ADC synthase	GO:0008909, GO:0009058, GO:0008909, GO:0009234, GO:0009058, GO:0009058	KEGG: 00130+5.4.4.2|MetaCyc: PWY-5837|MetaCyc: PWY-5901|MetaCyc: PWY-6406, KEGG: 00130+5.4.4.2|MetaCyc: PWY-5837|MetaCyc: PWY-5901|MetaCyc: PWY-6406
NZ_CP050969.1_204_42	1441930.Z042_03325	1.6e-211	741.9	Serratia	alaA	GO:0003674,GO:0003824,GO:0004021,GO:0005488,GO:0005575,GO:0005623,GO:0005886,GO:0006082,GO:0006090,GO:0006520,GO:0006522,GO:0006523,GO:0006807,GO:0006950,GO:0006974,GO:0008144,GO:0008150,GO:0008152,GO:0008483,GO:0008652,GO:0009058,GO:0009078,GO:0009079,GO:0009987,GO:0016020,GO:0016053,GO:0016740,GO:0016769,GO:0019272,GO:0019752,GO:0019842,GO:0030170,GO:0030632,GO:0032787,GO:0033554,GO:0036094,GO:…	2.6.1.2,2.6.1.66	ko:K00814,ko:K14260	ko00220,ko00250,ko00290,ko00710,ko01100,ko01110,ko01120,ko01130,ko01200,ko01210,ko01230,map00220,map00250,map00290,map00710,map01100,map01110,map01120,map01130,map01200,map01210,map01230	M00171	R00258,R01215	RC00006,RC00008,RC00036	ko00000,ko00001,ko00002,ko01000,ko01007			iNJ661.Rv0337c	Bacteria	1MW0Z@1224,1RN5B@1236,3ZZTB@613,COG0436@1,COG0436@2	NA|NA|NA	E	in Corynebacterium glutamicum this protein can use glutamate, 2-aminobutyrate, and aspartate as amino donors and pyruvate as the acceptor	CDD, SUPERFAMILY, Pfam, Gene3D, PANTHER, Gene3D, PANTHER	cd00609, SSF53383, PF00155, G3DSA:3.90.1150.10, PTHR43488:SF2, G3DSA:3.40.640.10, PTHR43488	AAT_like, Aminotransferase class I and II, nan]	IPR015424, IPR004839, IPR015422, IPR015421	Pyridoxal phosphate-dependent transferase, Aminotransferase, class I/classII, Pyridoxal phosphate-dependent transferase domain 1, Pyridoxal phosphate-dependent transferase, major domain	GO:0009058, GO:0030170, GO:0003824, GO:0003824
NZ_CP050969.1_204_43	218491.ECA3034	7.7e-82	310.1	Pectobacterium	yfbR	GO:0002953,GO:0003674,GO:0003824,GO:0005488,GO:0005515,GO:0006139,GO:0006220,GO:0006221,GO:0006226,GO:0006725,GO:0006753,GO:0006793,GO:0006796,GO:0006807,GO:0008150,GO:0008152,GO:0008655,GO:0009058,GO:0009117,GO:0009123,GO:0009124,GO:0009129,GO:0009130,GO:0009157,GO:0009162,GO:0009165,GO:0009176,GO:0009177,GO:0009219,GO:0009221,GO:0009262,GO:0009263,GO:0009265,GO:0009394,GO:0009987,GO:0010139,GO:…	3.1.3.89	ko:K08722	ko00240,ko01100,map00240,map01100		R01569,R01664,R01968,R02088,R02102,R10776	RC00017	ko00000,ko00001,ko01000			iB21_1397.B21_02176,iEC55989_1330.EC55989_2535,iECBD_1354.ECBD_1368,iECB_1328.ECB_02216,iECD_1391.ECD_02216,iECH74115_1262.ECH74115_3430,iECIAI1_1343.ECIAI1_2365,iECIAI39_1322.ECIAI39_2438,iECO111_1330.ECO111_3039,iECO26_1355.ECO26_3279,iECSE_1348.ECSE_2548,iECSP_1301.ECSP_3165,iECUMN_1333.ECUMN_2630,iECs_1301.ECs3175,iEcHS_1320.EcHS_A2440,iEcSMS35_1347.EcSMS35_2446,iEcolC_1368.EcolC_1361,iG2583_…	Bacteria	1MQ9N@122277,1MVGJ@1224,1RSED@1236,COG1896@1,COG1896@2	NA|NA|NA	F	Catalyzes the strictly specific dephosphorylation of 2- deoxyribonucleoside 5-monophosphates	CDD, SUPERFAMILY, ProDom, Pfam, Gene3D, Hamap, PANTHER, PANTHER, ProSiteProfiles, SMART	cd00077, SSF109604, PD353566, PF13023, G3DSA:1.10.3210.10, MF_01100, PTHR11845:SF13, PTHR11845, PS51831, SM00471	HDc, UPF0207 HYDROLASE HD PHOSPHOHYDROLASE METAL-DEPENDENT SUBDOMAIN YFBR PHOSPHOHYDROLASE NUCLEOTIDE-BINDING NUCLEOSIDE, HD domain, \5-deoxynucleotidase YfbR [yfbR].\", HD domain profile."	IPR003607, IPR006674, IPR022971, IPR039356, IPR003607, IPR003607	HD/PDEase domain, HD domain, \5-deoxynucleotidase YfbR\", \"Metal-dependent nucleoside 5-monophosphatase\", HD/PDEase domain, HD/PDEase domain"	GO:0002953	KEGG: 00240+3.1.3.89, KEGG: 00240+3.1.3.89
NZ_CP050969.1_204_44	NA	NA	NA	NA	NA	NA	NA	NA	NA	NA	NA	NA	NA	NA	NA	NA	NA	NA	NA	NA	NA	ProSiteProfiles	PS51257	Prokaryotic membrane lipoprotein lipid attachment site profile.
NZ_CP050969.1_204_45	1448139.AI20_00055	9.7e-144	516.5	Aeromonadales	ansB	GO:0003674,GO:0003824,GO:0004067,GO:0005488,GO:0005515,GO:0005575,GO:0005622,GO:0005623,GO:0005737,GO:0005829,GO:0006082,GO:0006520,GO:0006528,GO:0006530,GO:0006807,GO:0008150,GO:0008152,GO:0009056,GO:0009063,GO:0009064,GO:0009065,GO:0009066,GO:0009068,GO:0009987,GO:0016043,GO:0016054,GO:0016787,GO:0016810,GO:0016811,GO:0019752,GO:0022607,GO:0030288,GO:0030313,GO:0031975,GO:0032787,GO:0034641,GO:…	3.5.1.1,3.5.1.38	ko:K01424,ko:K05597	ko00220,ko00250,ko00460,ko00471,ko01100,ko01110,ko02020,map00220,map00250,map00460,map00471,map01100,map01110,map02020		R00256,R00485,R01579	RC00010,RC02798	ko00000,ko00001,ko01000				Bacteria	1MWIR@1224,1RNPN@1236,1Y6JZ@135624,COG0252@1,COG0252@2	NA|NA|NA	EJ	Belongs to the asparaginase 1 family	TIGRFAM, PIRSF, PANTHER, Pfam, ProSiteProfiles, SMART, ProSitePatterns, Gene3D, Gene3D, SUPERFAMILY, CDD, ProSitePatterns, PANTHER, PIRSF, PRINTS, PRINTS, PRINTS	TIGR00520, PIRSF001220, PTHR43828:SF3, PF00710, PS51732, SM00870, PS00144, G3DSA:3.40.50.1170, G3DSA:3.40.50.40, SSF53774, cd08964, PS00917, PTHR43828, PIRSF500176, PR00139, PR00139, PR00139	asnASE_II: L-asparaginase, type II, Asparaginase, N-terminal, Asparaginase / glutaminase domain profile., Asparaginase / glutaminase active site signature 1., L-asparaginase_II, Asparaginase / glutaminase active site signature 2., Asparaginase/glutaminase family signature, Asparaginase/glutaminase family signature, Asparaginase/glutaminase family signature	IPR004550, IPR006034, IPR027474, IPR006034, IPR006034, IPR020827, IPR037152, IPR027473, IPR036152, IPR027475, IPR006034, IPR006034, IPR006034	L-asparaginase, type II, Asparaginase/glutaminase-like, L-asparaginase, N-terminal, Asparaginase/glutaminase-like, Asparaginase/glutaminase-like, Asparaginase/glutaminase, active site 1, L-asparaginase, N-terminal domain superfamily, L-asparaginase, C-terminal, Asparaginase/glutaminase-like superfamily, Asparaginase/glutaminase, active site 2, Asparaginase/glutaminase-like, Asparaginase/glutamina…	GO:0004067, GO:0006528, GO:0006520,nan]	Reactome: R-HSA-70614, Reactome: R-HSA-70614, Reactome: R-HSA-70614, Reactome: R-HSA-70614, Reactome: R-HSA-70614, Reactome: R-HSA-70614, Reactome: R-HSA-70614, Reactome: R-HSA-70614, Reactome: R-HSA-70614, Reactome: R-HSA-70614, Reactome: R-HSA-70614
NZ_CP050969.1_204_46	321332.CYB_2053	1.8e-11	76.3	Bacteria													Bacteria	2BZXA@1,33P5U@2	NA|NA|NA			NA	NA	NA	NA	NA	NA	NA
NZ_CP050969.1_204_47	1225785.CM001983_gene1915	5.6e-266	923.3	Dickeya	ycaO	GO:0000287,GO:0003674,GO:0003824,GO:0005488,GO:0005575,GO:0005622,GO:0005623,GO:0005737,GO:0005829,GO:0006464,GO:0006807,GO:0008150,GO:0008152,GO:0009987,GO:0016462,GO:0016787,GO:0016817,GO:0016818,GO:0018193,GO:0018197,GO:0018198,GO:0018339,GO:0019538,GO:0036211,GO:0043167,GO:0043169,GO:0043170,GO:0043412,GO:0044237,GO:0044238,GO:0044260,GO:0044267,GO:0044424,GO:0044444,GO:0044464,GO:0046872,GO:…		ko:K09136					ko00000,ko03009				Bacteria	1MV7K@1224,1RN47@1236,2JBQM@204037,COG1944@1,COG1944@2	NA|NA|NA	S	YcaO cyclodehydratase, ATP-ad Mg2+-binding	PANTHER, ProSiteProfiles, TIGRFAM, Pfam	PTHR37809, PS51664, TIGR00702, PF02624	YcaO domain profile., TIGR00702: YcaO-type kinase domain, YcaO cyclodehydratase, ATP-ad Mg2+-binding	IPR003776, IPR003776, IPR003776	YcaO-like domain, YcaO-like domain, YcaO-like domain
NZ_CP050969.1_204_48	675817.VDA_001480	3.4e-107	394.8	Vibrionales	focA	GO:0003674,GO:0005215,GO:0005342,GO:0005488,GO:0005515,GO:0005575,GO:0005623,GO:0005886,GO:0005887,GO:0006810,GO:0006811,GO:0006820,GO:0006855,GO:0008028,GO:0008150,GO:0008509,GO:0008514,GO:0015075,GO:0015238,GO:0015318,GO:0015499,GO:0015711,GO:0015718,GO:0015724,GO:0015849,GO:0015893,GO:0016020,GO:0016021,GO:0022857,GO:0031224,GO:0031226,GO:0034220,GO:0042221,GO:0042493,GO:0042802,GO:0042891,GO:…		ko:K02598,ko:K03459,ko:K06212,ko:K21993					ko00000,ko02000	1.A.16.1.1,1.A.16.1.2,1.A.16.1.3,1.A.16.2,1.A.16.3		iB21_1397.B21_02346,iECBD_1354.ECBD_1196,iECB_1328.ECB_02384,iECD_1391.ECD_02384,iECIAI39_1322.ECIAI39_2632,iEcSMS35_1347.EcSMS35_2639,iSF_1195.SF0899,iS_1188.S0963	Bacteria	1MU0W@1224,1RQ6K@1236,1XUCS@135623,COG2116@1,COG2116@2	NA|NA|NA	P	COG2116 Formate nitrite family of transporters	PANTHER, ProSitePatterns, ProSitePatterns, Pfam, PANTHER, TIGRFAM, Gene3D, TIGRFAM	PTHR30520, PS01005, PS01006, PF01226, PTHR30520:SF4, TIGR00790, G3DSA:1.20.1080.10, TIGR04060	Formate and nitrite transporters signature 1., Formate and nitrite transporters signature 2., Formate/nitrite transporter, fnt: formate/nitrite transporter, formate_focA: formate transporter FocA	IPR000292, IPR024002, IPR024002, IPR000292, IPR000292, IPR023271, IPR023999	Formate/nitrite transporter, Formate/nitrite transporter, conserved site, Formate/nitrite transporter, conserved site, Formate/nitrite transporter, Formate/nitrite transporter, Aquaporin-like, Formate transporter FocA, putative	GO:0016020, GO:0022857, GO:0055085, GO:0016020, GO:0022857, GO:0055085, GO:0016020, GO:0022857, GO:0055085, GO:0015499, GO:0015724, GO:0016021	Reactome: R-HSA-432047
[truncated: 2,685 more rows]

## Sheet: antibiotic_resistant_genes
NZ_CP050969.1_162_10	1332071.L581_0285	7.8e-83	313.5	Serratia													Bacteria	1N0YI@1224,1RMWT@1236,401IG@613,COG0745@1,COG0745@2	NA|NA|NA	K	response regulator	['PANTHER', 'SMART', 'Pfam', 'Pfam', 'SUPERFAMILY', 'SMART', 'CDD', 'ProSiteProfiles', 'CDD', 'Gene3D', 'Gene3D', 'ProSiteProfiles', 'PANTHER']	['PTHR26402:SF716', 'SM00448', 'PF00072', 'PF00486', 'SSF52172', 'SM00862', 'cd00383', 'PS51755', 'cd00156', 'G3DSA:1.10.10.10', 'G3DSA:3.40.50.2300', 'PS50110', 'PTHR26402']	[nan, nan, 'Response regulator receiver domain', 'Transcriptional regulatory protein, C terminal', nan, nan, 'trans_reg_C', 'OmpR/PhoB-type DNA-binding domain profile.', 'REC', nan, nan, 'Response regulatory domain profile.', nan]	[nan, 'IPR001789', 'IPR001789', 'IPR001867', 'IPR011006', 'IPR001867', 'IPR001867', 'IPR001867', 'IPR001789', 'IPR036388', nan, 'IPR001789', 'IPR039420']		[nan, 'GO:0000160', 'GO:0000160', 'GO:0000160|GO:0003677|GO:0006355', nan, 'GO:0000160|GO:0003677|GO:0006355', 'GO:0000160|GO:0003677|GO:0006355', 'GO:0000160|GO:0003677|GO:0006355', 'GO:0000160', nan, nan, 'GO:0000160', nan]	[nan, nan, nan, nan, nan, nan, nan, nan, nan, nan, nan, nan, nan]
[truncated: 51 more rows]
